# Supplementary material for: Convergent organization of aberrant MYB complex controls oncogenic gene expression in acute myeloid leukemia
Source: eLife. 2021 Feb 2;10:e65905. doi: 10.7554/eLife.65905 (PMC7886351; doi:10.7554/eLife.65905)
Supplement: Figure 1—source data 1. [file elife-65905-fig1-data1.xlsx]

## Sheet: MYBMIM_GeCKO_gene_summary
id	num	neg|score	neg|p-value	neg|fdr	neg|rank	neg|goodsgrna	neg|lfc	pos|score	pos|p-value	pos|fdr	pos|rank	pos|goodsgrna	pos|lfc
A1BG	6	0.26573	0.47081	1	7971	3	-0.11191	0.58116	0.78752	1	15388	3	-0.11191
A1CF	6	0.82835	0.86828	1	16736	1	-0.0020745	0.37007	0.62104	1	12292	2	-0.0020745
A2M	6	0.30865	0.51937	1	8833	3	0.01761	0.29345	0.55497	1	11111	3	0.01761
A2ML1	6	0.79415	0.85457	1	16338	1	0.28207	0.061747	0.19109	0.897646	4331	5	0.28207
A3GALT2	6	0.93641	0.93651	1	18694	1	0.38684	0.14361	0.34467	0.95907	7332	4	0.38684
A4GALT	6	0.36269	0.57905	1	10028	3	0.22418	0.057648	0.1808	0.893537	4117	3	0.22418
A4GNT	6	0.48884	0.67052	1	11953	1	0.1993	0.33076	0.5891	1	11707	3	0.1993
AAAS	6	0.3949	0.61265	1	10688	2	0.2112	0.24639	0.493	1	9974	3	0.2112
AACS	6	0.021283	0.07623	0.666934	2316	5	-0.50231	0.65111	0.82692	1	16144	1	-0.50231
AADAC	6	0.86331	0.88497	1	17215	1	-0.054731	0.41846	0.65992	1	12994	1	-0.054731
AADACL2	6	0.97506	0.97518	1	19805	0	0.45461	0.0067793	0.031441	0.761191	816	5	0.45461
AADACL3	6	0.15051	0.33521	1	5809	3	-0.3049	0.51956	0.73989	1	14477	2	-0.3049
AADACL4	6	0.41736	0.62612	1	10984	1	0.31194	0.19169	0.4167	0.985936	8615	4	0.31194
AADAT	6	0.99414	0.99419	1	20463	0	0.41609	0.0058628	0.027412	0.761191	708	6	0.41609
AAED1	6	0.027547	0.09562	0.745234	2593	5	-0.53077	0.98344	0.98361	1	19701	0	-0.53077
AAGAB	6	0.00012565	0.00068087	0.032701	431	4	-1.5555	0.23624	0.47926	1	9736	2	-1.5555
AAK1	6	0.12531	0.29569	1	5250	4	-0.29441	0.10068	0.27563	0.933352	6015	2	-0.29441
AAMDC	6	0.19941	0.39381	1	6710	2	0.045401	0.12935	0.32215	0.954023	6865	3	0.045401
AAMP	6	0.079509	0.2074	1	4002	2	0.071258	0.50952	0.73201	1	14338	3	0.071258
AANAT	6	0.5228	0.69233	1	12446	2	-0.077605	0.6646	0.83259	1	16248	2	-0.077605
AAR2	6	0.030838	0.1039	0.774765	2708	4	-0.45274	0.97426	0.97484	1	19428	1	-0.45274
AARD	6	0.36711	0.58387	1	10133	3	0.096747	0.46048	0.69331	1	13654	3	0.096747
AARS	6	0.00082784	0.0043328	0.109777	806	5	-1.8342	0.89565	0.94112	1	18438	1	-1.8342
AARS2	6	0.0064946	0.027042	0.359754	1533	3	-0.1916	0.97528	0.97572	1	19457	1	-0.1916
AARSD1	6	0.33919	0.55333	1	9523	3	-0.085818	0.75807	0.87524	1	17030	2	-0.085818
AASDH	6	0.36106	0.57725	1	9984	1	0.70431	0.0053795	0.025286	0.761191	664	4	0.70431
AASDHPPT	6	0.00010335	0.0005613	0.029047	400	5	-1.1706	0.9922	0.99228	1	20004	0	-1.1706
AASS	6	0.14355	0.3267	1	5697	3	-0.36737	0.46289	0.69522	1	13695	2	-0.36737
AATF	6	0.011301	0.043686	0.48488	1834	5	-1.0457	0.24087	0.48559	1	9854	1	-1.0457
AATK	6	0.95035	0.95041	1	19099	0	0.81385	0.025216	0.092817	0.838106	2231	4	0.81385
ABAT	6	0.67154	0.79577	1	14818	1	0.51712	0.068026	0.20646	0.905457	4647	5	0.51712
ABCA1	6	0.89873	0.90599	1	17829	1	0.52111	0.044255	0.14595	0.88275	3374	4	0.52111
ABCA10	6	0.99828	0.99828	1	20611	0	0.38693	0.0017235	0.0086672	0.680397	247	6	0.38693
ABCA12	6	0.097755	0.24358	1	4504	4	-0.26159	0.97917	0.97931	1	19567	1	-0.26159
ABCA13	6	0.23894	0.43971	1	7444	3	-0.048189	0.44364	0.67997	1	13391	2	-0.048189
ABCA2	6	0.55329	0.71258	1	12900	1	0.14936	0.52412	0.74341	1	14543	3	0.14936
ABCA3	6	0.2967	0.50584	1	8600	3	-0.10138	0.21283	0.44684	0.995853	9171	3	-0.10138
ABCA4	6	0.29114	0.49962	1	8483	2	-0.1211	0.10847	0.28838	0.937125	6266	1	-0.1211
ABCA5	6	0.11	0.26704	1	4845	3	-0.20601	0.76242	0.87736	1	17077	2	-0.20601
ABCA6	6	0.55761	0.71545	1	12961	2	-0.0033654	0.48832	0.71525	1	14046	2	-0.0033654
ABCA7	6	0.02475	0.087116	0.715671	2459	4	-0.61584	0.12966	0.32264	0.954023	6876	2	-0.61584
ABCA8	6	0.384	0.60229	1	10500	3	0.061338	0.24397	0.48976	1	9917	3	0.061338
ABCA9	6	0.52843	0.69609	1	12533	2	0.21743	0.28101	0.53891	1	10848	4	0.21743
ABCB1	6	0.22911	0.42845	1	7254	2	0.070681	0.49034	0.71682	1	14073	3	0.070681
ABCB10	6	0.31703	0.52877	1	9015	3	-0.1598	0.99335	0.99342	1	20050	0	-0.1598
ABCB11	6	0.6367	0.77035	1	14224	2	0.26307	0.32165	0.58161	1	11578	3	0.26307
ABCB4	6	0.69617	0.8142	1	15250	2	0.082765	0.48078	0.70929	1	13934	3	0.082765
ABCB5	6	0.64455	0.77603	1	14361	1	0.22165	0.17763	0.39622	0.975569	8276	4	0.22165
ABCB6	6	0.76727	0.84509	1	16056	1	0.053507	0.3423	0.59848	1	11866	2	0.053507
ABCB7	6	0.00089721	0.0046948	0.116271	825	6	-1.2961	0.9991	0.99911	1	20424	0	-1.2961
ABCB8	6	0.81568	0.86296	1	16577	1	0.12441	0.20886	0.44123	0.993825	9064	3	0.12441
ABCB9	6	0.28146	0.48866	1	8286	3	-0.13621	0.80289	0.89798	1	17492	1	-0.13621
ABCC1	6	0.74133	0.83669	1	15785	1	0.041593	0.51463	0.73607	1	14399	3	0.041593
ABCC10	6	0.86311	0.88486	1	17210	1	0.33773	0.045112	0.14817	0.884307	3423	4	0.33773
ABCC11	6	0.081262	0.21089	1	4052	4	-0.36001	0.55951	0.77071	1	15073	2	-0.36001
ABCC12	6	0.76918	0.84574	1	16082	1	0.37597	0.094493	0.26523	0.923368	5831	4	0.37597
ABCC2	6	0.63703	0.7706	1	14232	2	0.15892	0.35762	0.61093	1	12094	3	0.15892
ABCC3	6	0.80362	0.85812	1	16447	1	0.15393	0.12303	0.31205	0.949113	6695	3	0.15393
ABCC4	6	0.14542	0.32896	1	5729	3	-0.20968	0.35615	0.60977	1	12065	2	-0.20968
ABCC5	6	0.38893	0.60763	1	10590	2	0.25406	0.14202	0.34212	0.95747	7289	3	0.25406
ABCC6	6	0.040515	0.12565	0.853912	2981	2	-0.041312	0.71228	0.85374	1	16633	2	-0.041312
ABCC8	6	0.98408	0.98424	1	20089	0	0.28437	0.070163	0.21166	0.906118	4752	5	0.28437
ABCC9	6	0.41352	0.62382	1	10938	2	0.14902	0.41491	0.65706	1	12946	3	0.14902
ABCD1	6	0.70669	0.8223	1	15435	1	0.11223	0.78043	0.88643	1	17266	2	0.11223
ABCD2	6	0.35485	0.57051	1	9853	2	0.19669	0.13345	0.32867	0.954428	7014	4	0.19669
ABCD3	6	0.93401	0.93421	1	18625	1	0.36386	0.14377	0.34492	0.95919	7336	4	0.36386
ABCD4	6	0.89759	0.90523	1	17809	1	0.34903	0.12024	0.30753	0.947174	6605	4	0.34903
ABCE1	6	0.0026559	0.012996	0.218711	1211	3	-0.40391	0.51001	0.73242	1	14344	2	-0.40391
ABCF1	6	0.089115	0.22656	1	4265	1	0.27841	0.19388	0.41986	0.986912	8676	4	0.27841
ABCF2	6	0.008988	0.035796	0.4308	1698	5	-0.88604	0.65072	0.82675	1	16136	1	-0.88604
ABCF3	6	0.17226	0.36154	1	6186	2	0.46207	0.062045	0.19184	0.89825	4348	4	0.46207
ABCG1	6	0.98947	0.98957	1	20302	0	0.52533	0.010526	0.047051	0.78356	1192	6	0.52533
ABCG2	6	0.69649	0.81444	1	15257	2	-0.089472	0.43725	0.67476	1	13283	2	-0.089472
ABCG4	6	0.3521	0.56752	1	9800	2	-0.054283	0.055095	0.17432	0.893243	3971	2	-0.054283
ABCG5	6	0.63152	0.76667	1	14150	2	0.069169	0.69123	0.84424	1	16462	2	0.069169
ABCG8	6	0.25375	0.45695	1	7725	2	0.30933	0.1238	0.31326	0.949971	6713	4	0.30933
ABHD1	6	0.96545	0.96542	1	19509	0	0.11063	0.6033	0.8045	1	15700	2	0.11063
ABHD10	6	0.44465	0.64287	1	11364	2	-0.085242	0.30607	0.56864	1	11350	2	-0.085242
ABHD11	6	0.043309	0.13179	0.873565	3051	4	-0.4136	0.99139	0.99144	1	19970	0	-0.4136
ABHD12	6	0.3927	0.61137	1	10669	2	0.35504	0.13538	0.33171	0.954735	7086	4	0.35504
ABHD12B	6	0.95562	0.95564	1	19241	0	0.19451	0.081822	0.23945	0.910182	5321	3	0.19451
ABHD13	6	0.31261	0.52384	1	8931	2	-0.035874	0.49857	0.72339	1	14187	2	-0.035874
ABHD14A	6	0.28253	0.48988	1	8311	2	-0.011619	0.52222	0.74193	1	14522	2	-0.011619
ABHD14B	6	0.69092	0.81025	1	15165	1	0.08532	0.38193	0.63066	1	12481	3	0.08532
ABHD15	6	0.02793	0.096793	0.749293	2609	5	-0.42424	0.95077	0.96018	1	19014	1	-0.42424
ABHD16A	6	0.52997	0.69714	1	12556	2	0.67186	0.032232	0.11293	0.867579	2652	4	0.67186
ABHD16B	6	0.045818	0.13724	0.891737	3114	3	0.070475	0.25038	0.49836	1	10066	3	0.070475
ABHD17A	6	0.17291	0.36232	1	6201	3	-0.31494	0.87928	0.93706	1	18340	1	-0.31494
ABHD17B	6	0.058055	0.16357	0.968292	3408	4	-0.57245	0.98959	0.9897	1	19893	0	-0.57245
ABHD17C	6	0.65829	0.78593	1	14608	2	0.18506	0.39875	0.64427	1	12740	3	0.18506
ABHD2	6	0.95782	0.95778	1	19296	0	0.55829	0.024944	0.092033	0.837101	2218	4	0.55829
ABHD3	6	0.57747	0.72892	1	13266	2	0.046217	0.57696	0.78423	1	15328	3	0.046217
ABHD4	6	0.48938	0.67085	1	11958	2	0.29159	0.061049	0.18937	0.897633	4295	4	0.29159
ABHD5	6	0.27709	0.48372	1	8201	2	0.11602	0.30175	0.56504	1	11278	3	0.11602
ABHD6	6	0.070042	0.18829	1	3750	4	-0.49323	0.15815	0.36704	0.970476	7718	1	-0.49323
ABHD8	6	0.21849	0.41606	1	7036	3	-0.12618	0.44352	0.67987	1	13387	2	-0.12618
ABI1	6	0.99335	0.99343	1	20432	0	0.45417	0.0066467	0.030855	0.761191	804	6	0.45417
ABI2	6	0.63096	0.76627	1	14139	2	-0.035261	0.84813	0.9231	1	18013	2	-0.035261
ABI3	6	0.10676	0.26086	1	4752	4	-0.32326	0.27483	0.53091	1	10694	2	-0.32326
ABI3BP	6	0.17055	0.35952	1	6161	2	0.38156	0.033946	0.11777	0.872199	2751	3	0.38156
ABL1	6	0.083963	0.2163	1	4132	4	-0.38182	0.46579	0.69752	1	13739	2	-0.38182
ABL2	6	0.75174	0.84	1	15895	1	0.25031	0.18579	0.40813	0.980588	8486	4	0.25031
ABLIM1	6	0.94835	0.94842	1	19027	0	0.50796	0.041703	0.13909	0.880623	3205	5	0.50796
ABLIM2	6	0.58579	0.73464	1	13397	2	0.23862	0.019837	0.076918	0.827779	1866	3	0.23862
ABLIM3	6	0.64615	0.77718	1	14388	2	0.19808	0.11415	0.29773	0.941322	6439	4	0.19808
ABO	6	0.20409	0.39933	1	6804	2	0.046452	0.54901	0.76266	1	14923	3	0.046452
ABP1	6	0.98971	0.98981	1	20308	0	0.40707	0.010288	0.046068	0.780168	1170	6	0.40707
ABR	6	0.57179	0.72506	1	13188	1	0.15431	0.20538	0.43632	0.993006	8968	3	0.15431
ABRA	6	0.49204	0.6725	1	11996	2	0.1104	0.5852	0.79067	1	15448	3	0.1104
ABRACL	6	0.10215	0.25208	1	4616	4	-0.2313	0.93196	0.9522	1	18761	1	-0.2313
ABT1	6	0.0023954	0.011836	0.204682	1173	5	-0.75785	0.99447	0.99451	1	20109	0	-0.75785
ABTB1	6	0.52786	0.69569	1	12524	1	0.26289	0.080279	0.23576	0.910182	5242	5	0.26289
ABTB2	6	0.28348	0.49093	1	8325	2	0.37416	0.090559	0.25858	0.919235	5707	4	0.37416
ACAA1	6	0.16262	0.34994	1	6029	3	-0.05859	0.42991	0.669	1	13168	2	-0.05859
ACAA2	6	0.95306	0.95313	1	19170	0	0.81734	0.013373	0.056989	0.805138	1411	5	0.81734
ACACA	6	0.015472	0.057557	0.571699	2050	3	-0.15817	0.91144	0.94548	1	18568	1	-0.15817
ACACB	6	0.39497	0.61269	1	10689	2	0.092994	0.54605	0.76037	1	14867	3	0.092994
ACAD10	6	0.99351	0.99358	1	20440	0	0.27255	0.0064891	0.030177	0.761191	784	6	0.27255
ACAD11	6	0.44701	0.64432	1	11399	1	0.17391	0.019602	0.076198	0.827779	1852	4	0.17391
ACAD8	6	0.59076	0.73809	1	13484	2	0.18784	0.046101	0.15082	0.886571	3471	3	0.18784
ACAD9	6	0.28542	0.49313	1	8361	2	0.17567	0.26113	0.51297	1	10346	4	0.17567
ACADL	6	0.1479	0.33202	1	5772	3	-0.27562	0.60182	0.80342	1	15678	2	-0.27562
ACADM	6	0.51593	0.6879	1	12345	1	0.41396	0.14104	0.34065	0.957267	7252	4	0.41396
ACADS	6	0.094433	0.23706	1	4410	3	-0.14665	0.12264	0.31139	0.948664	6682	2	-0.14665
ACADSB	6	0.19528	0.38891	1	6623	3	-0.011487	0.036561	0.12499	0.878335	2889	2	-0.011487
ACADVL	6	0.60517	0.74808	1	13709	2	0.54785	0.091485	0.26013	0.920282	5734	4	0.54785
ACAN	6	0.095126	0.23849	1	4426	4	-0.23874	0.98682	0.9869	1	19808	0	-0.23874
ACAP1	6	0.52798	0.69577	1	12527	2	0.0053576	0.90331	0.94314	1	18497	1	0.0053576
ACAP2	6	0.94098	0.94109	1	18817	0	0.40687	0.016394	0.066349	0.816005	1632	4	0.40687
ACAP3	6	0.21455	0.4115	1	6971	3	0.0071082	0.37249	0.62294	1	12346	3	0.0071082
ACAT1	6	0.97896	0.9791	1	19931	0	0.41955	0.038346	0.12992	0.880623	2996	5	0.41955
ACAT2	6	0.24529	0.4471	1	7577	3	-0.19925	0.42929	0.6685	1	13153	2	-0.19925
ACBD3	6	0.37019	0.58722	1	10209	2	0.029613	0.52679	0.7455	1	14578	3	0.029613
ACBD4	6	0.15963	0.34634	1	5971	3	-0.1891	0.039536	0.13317	0.880623	3069	2	-0.1891
ACBD5	6	0.22983	0.42925	1	7273	1	0.31359	0.02178	0.082696	0.830034	2001	4	0.31359
ACBD6	6	0.81913	0.86438	1	16630	1	0.14805	0.56055	0.77151	1	15090	3	0.14805
ACBD7	6	0.3111	0.52215	1	8892	3	-0.19408	0.97833	0.97848	1	19546	1	-0.19408
ACCS	6	0.28328	0.4907	1	8322	1	0.18025	0.1757	0.39337	0.975177	8228	3	0.18025
ACCSL	6	0.70089	0.81786	1	15338	2	0.16028	0.25676	0.50705	1	10227	3	0.16028
ACD	6	0.048001	0.14197	0.908988	3163	4	-0.65767	0.44218	0.67879	1	13364	2	-0.65767
ACE	6	0.10873	0.26461	1	4805	4	-0.23924	0.76167	0.87698	1	17065	2	-0.23924
ACE2	6	0.22342	0.42178	1	7138	3	-0.082828	0.80608	0.8997	1	17519	2	-0.082828
ACER1	6	0.90601	0.91105	1	17967	1	0.53712	0.075456	0.22444	0.90855	5012	5	0.53712
ACER2	6	0.64127	0.77363	1	14315	2	0.037587	0.63128	0.81863	1	15973	2	0.037587
ACER3	6	0.21239	0.40899	1	6938	3	-0.026422	0.54521	0.75972	1	14850	3	-0.026422
ACHE	6	0.18284	0.37413	1	6395	2	0.0067731	0.57842	0.78535	1	15348	3	0.0067731
ACIN1	6	0.94063	0.94074	1	18804	0	0.47243	0.028383	0.10203	0.857731	2407	5	0.47243
ACKR2	6	0.027747	0.09622	0.746684	2601	4	-0.45974	0.94893	0.9593	1	18999	1	-0.45974
ACKR3	6	0.69386	0.81245	1	15213	1	0.55053	0.02407	0.089516	0.831091	2172	4	0.55053
ACKR4	6	0.23951	0.44039	1	7454	3	-0.13358	0.91081	0.94528	1	18558	1	-0.13358
ACLY	6	0.0070352	0.028974	0.380081	1562	5	-0.4847	0.99038	0.99046	1	19930	0	-0.4847
ACMSD	6	0.99005	0.99014	1	20318	0	0.69592	0.0099479	0.044706	0.778921	1133	6	0.69592
ACN9	6	0.98699	0.98707	1	20200	0	0.68264	0.017889	0.070971	0.816005	1746	5	0.68264
ACO1	6	0.99266	0.99273	1	20400	0	0.55727	0.0073389	0.033854	0.761407	883	6	0.55727
ACO2	6	1.59e-05	9.78e-05	0.010998	182	5	-1.6507	0.99652	0.99657	1	20217	0	-1.6507
ACOT1	6	0.58238	0.73227	1	13344	2	0.47941	0.015575	0.063891	0.814685	1572	4	0.47941
ACOT11	6	0.22848	0.42773	1	7239	3	-0.093666	0.55372	0.76629	1	14994	2	-0.093666
ACOT12	6	0.42648	0.63165	1	11114	2	0.15096	0.48541	0.71295	1	14007	3	0.15096
ACOT13	6	0.73034	0.83336	1	15699	1	0.12334	0.25323	0.5023	1	10142	3	0.12334
ACOT2	6	0.93161	0.93192	1	18565	1	0.28193	0.089578	0.25688	0.917835	5676	4	0.28193
ACOT4	6	0.85421	0.8803	1	17070	1	0.47708	0.035905	0.12316	0.878335	2852	4	0.47708
ACOT6	6	0.68846	0.80837	1	15122	2	0.42745	0.0029129	0.01425	0.724107	392	4	0.42745
ACOT7	6	0.4246	0.63057	1	11091	2	0.0030112	0.94879	0.95923	1	18995	1	0.0030112
ACOT8	6	0.85514	0.88076	1	17089	1	0.11776	0.3193	0.57969	1	11536	3	0.11776
ACOT9	6	0.99555	0.99561	1	20509	0	0.53738	0.0044537	0.021262	0.761191	551	6	0.53738
ACOX1	6	0.73579	0.83502	1	15742	1	0.46216	0.028449	0.10224	0.857731	2412	5	0.46216
ACOX2	6	0.45924	0.65188	1	11554	2	0.094141	0.09251	0.26185	0.922254	5763	3	0.094141
ACOX3	6	0.99992	0.99992	1	20691	0	1.0004	7.84e-05	0.00040967	0.235561	35	6	1.0004
ACOXL	6	0.12802	0.30071	1	5322	2	0.094652	0.44304	0.6795	1	13376	3	0.094652
ACP1	6	0.8226	0.86584	1	16677	1	0.19261	0.25995	0.51135	1	10314	4	0.19261
ACP2	6	0.3811	0.5991	1	10437	3	-0.094315	0.98444	0.98459	1	19731	0	-0.094315
ACP5	6	0.54202	0.70512	1	12733	2	0.13825	0.057178	0.17963	0.893243	4094	3	0.13825
ACP6	6	0.76347	0.84379	1	16013	1	0.40468	0.046585	0.1521	0.886571	3496	4	0.40468
ACPL2	6	0.88337	0.89617	1	17552	1	0.021187	0.13724	0.33464	0.956288	7131	2	0.021187
ACPP	6	0.080167	0.20867	1	4023	4	-0.20582	0.81119	0.90245	1	17577	2	-0.20582
ACPT	6	0.16711	0.35537	1	6099	2	0.021263	0.49961	0.72418	1	14202	2	0.021263
ACR	6	0.51948	0.69018	1	12393	2	-0.10975	0.83065	0.91313	1	17809	1	-0.10975
ACRBP	6	0.95302	0.95309	1	19167	0	0.49168	0.079434	0.23379	0.910182	5201	5	0.49168
ACRC	5	0.99276	0.99276	1	20404	0	0.53337	0.0072387	0.029404	0.761191	874	5	0.53337
ACRV1	6	0.35781	0.57369	1	9918	3	-0.013525	0.60458	0.80549	1	15717	3	-0.013525
ACSBG1	6	0.2622	0.46676	1	7907	3	0.10111	0.11753	0.30317	0.94298	6541	3	0.10111
ACSBG2	6	0.14324	0.32631	1	5692	3	0.11965	0.017928	0.071081	0.816005	1749	3	0.11965
ACSF2	6	0.6659	0.79154	1	14718	2	0.33175	0.047489	0.15448	0.88659	3558	3	0.33175
ACSF3	6	0.68966	0.80931	1	15140	2	-0.10633	0.15254	0.35848	0.967498	7560	2	-0.10633
ACSL1	6	0.96326	0.96323	1	19457	0	0.80078	0.0051999	0.024513	0.761191	636	5	0.80078
ACSL3	6	0.2786	0.48547	1	8238	1	0.0098256	0.11737	0.30293	0.94281	6536	2	0.0098256
ACSL4	6	0.2748	0.48113	1	8152	3	0.15894	0.067013	0.20403	0.904083	4595	3	0.15894
ACSL5	6	0.34725	0.56219	1	9693	3	-0.045843	0.34079	0.59726	1	11845	2	-0.045843
ACSL6	6	0.71328	0.82733	1	15554	1	0.34941	0.10714	0.28623	0.937045	6217	4	0.34941
ACSM1	6	0.36393	0.58043	1	10060	2	0.26999	0.25066	0.49875	1	10074	3	0.26999
ACSM2A	6	0.85464	0.88051	1	17079	1	0.39524	0.04835	0.15673	0.887526	3605	5	0.39524
ACSM2B	6	0.58445	0.73371	1	13375	2	0.40614	0.0089012	0.040362	0.77251	1034	4	0.40614
ACSM3	6	0.29619	0.5053	1	8592	2	0.29388	0.21016	0.44306	0.993825	9103	4	0.29388
ACSM4	6	0.099452	0.24695	1	4554	1	0.15308	0.49923	0.72386	1	14197	3	0.15308
ACSM5	6	0.32962	0.54279	1	9303	3	-0.15455	0.83488	0.91556	1	17874	1	-0.15455
ACSS1	6	0.63167	0.76678	1	14154	1	0.2075	0.29345	0.55497	1	11112	4	0.2075
ACSS2	6	0.43168	0.63484	1	11202	2	-0.070816	0.89335	0.94051	1	18423	1	-0.070816
ACSS3	6	0.92286	0.92414	1	18336	1	0.076831	0.74126	0.86707	1	16878	2	0.076831
ACTA1	6	0.97325	0.97329	1	19745	0	0.24552	0.24646	0.49308	1	9978	4	0.24552
ACTA2	6	0.93941	0.93951	1	18767	0	0.47701	0.039343	0.13264	0.880623	3057	5	0.47701
ACTB	6	0.0023316	0.011548	0.201047	1167	5	-1.6015	0.56988	0.77877	1	15214	1	-1.6015
ACTBL2	6	0.23067	0.43021	1	7288	1	0.038276	0.59801	0.8005	1	15632	2	0.038276
ACTC1	6	0.70575	0.82156	1	15419	2	0.12684	0.2549	0.50455	1	10191	3	0.12684
ACTG1	6	0.14964	0.33413	1	5800	2	-0.12628	0.33741	0.59451	1	11792	2	-0.12628
ACTG2	6	0.70434	0.82048	1	15398	1	0.64162	0.077654	0.22958	0.909255	5114	4	0.64162
ACTL10	6	0.67352	0.79724	1	14853	2	1.007	0.0016967	0.0085471	0.680397	240	4	1.007
ACTL6A	6	0.0011565	0.0059509	0.133027	917	3	-0.51455	0.49703	0.72214	1	14160	2	-0.51455
ACTL6B	6	0.31115	0.5222	1	8894	3	-0.15013	0.80726	0.90035	1	17534	1	-0.15013
ACTL7A	6	0.96521	0.96518	1	19502	0	0.45918	0.019877	0.077031	0.827779	1868	4	0.45918
ACTL7B	6	0.49913	0.67707	1	12096	2	-0.0013157	0.37387	0.62408	1	12373	2	-0.0013157
ACTL8	6	0.49884	0.67689	1	12091	2	0.32295	0.046627	0.1522	0.886571	3500	3	0.32295
ACTL9	6	0.15684	0.34294	1	5930	3	-0.26505	0.80974	0.90167	1	17566	2	-0.26505
ACTN1	6	0.12955	0.30356	1	5361	3	-0.19315	0.033716	0.11712	0.870167	2742	2	-0.19315
ACTN2	6	0.62598	0.7628	1	14056	2	0.17898	0.043624	0.14425	0.880623	3334	3	0.17898
ACTN4	6	0.068612	0.18538	1	3709	2	0.19005	0.23372	0.47578	1	9664	3	0.19005
ACTR10	6	0.043294	0.13175	0.873565	3050	4	-0.87065	0.17038	0.3855	0.975177	8054	2	-0.87065
ACTR1A	6	0.28221	0.48951	1	8305	2	0.11971	0.017236	0.068953	0.816005	1691	3	0.11971
ACTR1B	6	0.87486	0.89122	1	17419	1	0.29533	0.21893	0.45535	0.999314	9323	4	0.29533
ACTR2	6	0.004915	0.0213	0.308233	1413	4	-1.8325	0.56848	0.77767	1	15201	2	-1.8325
ACTR3	6	0.00051516	0.0027146	0.082168	681	5	-1.2717	0.9578	0.96374	1	19115	1	-1.2717
ACTR3B	6	0.05542	0.15799	0.955431	3343	3	-0.23996	0.85851	0.92925	1	18156	2	-0.23996
ACTR3C	6	0.26631	0.47145	1	7983	3	0.004038	0.41084	0.65387	1	12894	3	0.004038
ACTR5	6	0.025238	0.088555	0.721407	2480	2	0.059465	0.2876	0.54743	1	10986	3	0.059465
ACTR6	6	0.0011655	0.0059944	0.133567	920	2	0.11032	0.22334	0.46157	1	9438	3	0.11032
ACTR8	6	0.035935	0.11545	0.818677	2855	3	-0.28248	0.71787	0.85631	1	16685	2	-0.28248
ACTRT1	6	0.82949	0.86875	1	16752	1	0.28087	0.083863	0.24419	0.91142	5427	4	0.28087
ACTRT2	6	0.53236	0.69872	1	12592	2	0.061658	0.32283	0.5826	1	11597	3	0.061658
ACTRT3	6	0.58894	0.73679	1	13451	1	0.083938	0.43785	0.67525	1	13295	3	0.083938
ACVR1	6	0.22623	0.42508	1	7191	2	0.21396	0.10348	0.28023	0.935096	6098	4	0.21396
ACVR1B	6	0.21351	0.41031	1	6958	2	0.1553	0.24783	0.49489	1	10019	4	0.1553
ACVR1C	6	0.1024	0.25256	1	4620	4	-0.2179	0.090309	0.25812	0.918694	5700	2	-0.2179
ACVR2A	6	0.45113	0.64689	1	11457	1	0.26537	0.085111	0.24709	0.91298	5482	5	0.26537
ACVR2B	6	0.70041	0.8175	1	15325	2	0.37025	0.093739	0.26393	0.922854	5807	4	0.37025
ACVRL1	6	0.62748	0.76383	1	14081	2	0.11158	0.5819	0.78811	1	15396	3	0.11158
ACY1	6	0.38163	0.59966	1	10444	3	-0.13886	0.82933	0.9124	1	17792	2	-0.13886
ACY3	6	0.1247	0.29454	1	5236	4	-0.30031	0.95467	0.96213	1	19060	1	-0.30031
ACYP1	5	0.40327	0.57343	1	10794	2	0.4155	0.1444	0.33731	0.957147	7348	3	0.4155
ACYP2	6	0.24615	0.44806	1	7601	1	0.19948	0.077937	0.23026	0.909353	5126	3	0.19948
ADA	6	0.5369	0.70167	1	12661	2	-0.029064	0.36072	0.61348	1	12157	2	-0.029064
ADAD1	6	0.97418	0.97426	1	19781	0	0.31339	0.035761	0.12274	0.878335	2842	5	0.31339
ADAD2	6	0.048906	0.14391	0.915664	3180	4	-0.40905	0.60004	0.80206	1	15658	1	-0.40905
ADAL	6	0.093739	0.23568	1	4383	2	0.33649	0.35548	0.60924	1	12057	3	0.33649
ADAM10	6	0.25292	0.45598	1	7711	3	-0.27942	0.45079	0.68564	1	13511	1	-0.27942
ADAM11	6	0.30933	0.52013	1	8851	3	0.015562	0.45166	0.68634	1	13529	3	0.015562
ADAM12	6	0.376	0.59356	1	10328	1	0.37921	0.097135	0.26975	0.928731	5900	4	0.37921
ADAM15	6	0.35056	0.56585	1	9765	2	0.6659	0.012669	0.054772	0.801098	1362	4	0.6659
ADAM17	6	0.36471	0.5813	1	10084	1	0.357	0.073929	0.22076	0.908121	4937	5	0.357
ADAM18	6	0.9156	0.91823	1	18183	1	0.36409	0.059468	0.18537	0.896551	4212	5	0.36409
ADAM19	6	0.66942	0.79421	1	14787	2	0.095447	0.048966	0.15833	0.888658	3639	3	0.095447
ADAM2	6	0.66146	0.78825	1	14651	2	-0.10939	0.3882	0.63578	1	12577	2	-0.10939
ADAM20	6	0.51704	0.68864	1	12360	2	0.19637	0.23664	0.47981	1	9744	4	0.19637
ADAM21	6	0.87194	0.88957	1	17367	1	0.26964	0.20537	0.43631	0.993006	8967	4	0.26964
ADAM22	6	0.71884	0.83013	1	15617	1	0.13558	0.35053	0.60525	1	11984	3	0.13558
ADAM23	6	0.27207	0.47799	1	8105	2	0.28364	0.069892	0.21097	0.905925	4738	3	0.28364
ADAM28	6	0.61245	0.75321	1	13817	2	0.23612	0.23437	0.47665	1	9681	4	0.23612
ADAM29	6	0.69909	0.81648	1	15302	2	0.43564	0.072244	0.21671	0.907386	4853	4	0.43564
ADAM30	6	0.54213	0.70519	1	12736	2	0.46477	0.032675	0.11418	0.867851	2677	4	0.46477
ADAM32	6	0.10616	0.25975	1	4732	4	-0.14928	0.7889	0.89078	1	17349	2	-0.14928
ADAM33	6	0.11665	0.2796	1	5019	4	-0.42336	0.22016	0.45702	0.999595	9356	2	-0.42336
ADAM7	6	0.22541	0.42411	1	7174	3	-0.15248	0.33364	0.59144	1	11748	1	-0.15248
ADAM8	6	0.78486	0.85119	1	16240	1	0.30352	0.0044026	0.021027	0.761191	544	4	0.30352
ADAM9	6	0.9112	0.91485	1	18075	1	-0.00072386	0.58908	0.79361	1	15505	2	-0.00072386
ADAMDEC1	6	0.37539	0.59289	1	10314	2	0.28943	0.22315	0.46129	1	9433	3	0.28943
ADAMTS1	6	0.97867	0.97881	1	19925	0	0.67062	0.0066537	0.030883	0.761191	805	5	0.67062
ADAMTS10	6	0.30254	0.51245	1	8713	3	-0.098224	0.13557	0.33202	0.955094	7090	2	-0.098224
ADAMTS12	6	0.5569	0.715	1	12952	1	0.2374	0.26926	0.52368	1	10563	3	0.2374
ADAMTS13	6	0.27106	0.47691	1	8092	3	-0.073437	0.82462	0.90976	1	17727	2	-0.073437
ADAMTS14	6	0.30849	0.51919	1	8830	2	0.24866	0.30905	0.57112	1	11385	3	0.24866
ADAMTS15	6	0.22739	0.42646	1	7220	3	-0.19254	0.22975	0.47042	1	9575	3	-0.19254
ADAMTS16	6	0.31952	0.53159	1	9071	1	0.47191	0.039014	0.13175	0.880623	3035	4	0.47191
ADAMTS17	6	0.37001	0.58702	1	10201	2	0.57174	0.051055	0.16386	0.890245	3750	4	0.57174
ADAMTS18	6	0.85722	0.88184	1	17121	1	0.81502	0.029257	0.10454	0.858889	2465	4	0.81502
ADAMTS19	6	0.3245	0.53712	1	9177	2	0.39744	0.074683	0.22254	0.90855	4975	4	0.39744
ADAMTS2	6	0.8536	0.87998	1	17062	1	0.15697	0.42428	0.66454	1	13079	3	0.15697
ADAMTS20	6	0.22965	0.42904	1	7266	3	-0.33926	0.64173	0.82294	1	16059	1	-0.33926
ADAMTS3	6	0.11408	0.27479	1	4949	4	-0.30276	0.81201	0.90288	1	17586	1	-0.30276
ADAMTS4	6	0.59429	0.74056	1	13541	1	0.72687	0.0065143	0.030287	0.761191	786	5	0.72687
ADAMTS5	6	0.99371	0.99378	1	20447	0	0.26056	0.0062924	0.029302	0.761191	761	6	0.26056
ADAMTS6	6	0.4469	0.64425	1	11397	2	-0.0041592	0.3481	0.60323	1	11946	2	-0.0041592
ADAMTS7	6	0.28028	0.48734	1	8268	3	-0.2135	0.77566	0.88403	1	17207	2	-0.2135
ADAMTS8	6	0.34935	0.56453	1	9742	3	-0.0016249	0.56123	0.77204	1	15102	3	-0.0016249
ADAMTS9	6	0.32049	0.53267	1	9087	3	-0.10288	0.82485	0.90989	1	17732	2	-0.10288
ADAMTSL1	6	0.24807	0.45022	1	7628	2	0.57714	0.014195	0.059565	0.807552	1477	4	0.57714
ADAMTSL2	6	0.9785	0.97863	1	19916	0	0.2596	0.039819	0.13396	0.880623	3088	5	0.2596
ADAMTSL3	6	0.45377	0.64852	1	11493	2	0.24383	0.019183	0.074899	0.825026	1825	4	0.24383
ADAMTSL4	6	0.18676	0.37885	1	6467	2	-0.050422	0.76817	0.88024	1	17130	2	-0.050422
ADAMTSL5	6	0.80488	0.85863	1	16461	1	0.30013	0.23852	0.48231	1	9788	4	0.30013
ADAP1	6	0.99542	0.99548	1	20504	0	0.66842	0.0045828	0.02181	0.761191	564	6	0.66842
ADAP2	6	0.9107	0.91445	1	18062	1	0.27719	0.28323	0.54179	1	10895	4	0.27719
ADAR	6	0.6071	0.74941	1	13742	2	0.13894	0.30048	0.56394	1	11253	4	0.13894
ADARB1	6	0.34197	0.55636	1	9585	2	0.19922	0.22525	0.46421	1	9482	4	0.19922
ADARB2	6	0.64596	0.77703	1	14384	2	0.30825	0.040393	0.13551	0.880623	3116	4	0.30825
ADAT1	6	0.71047	0.82518	1	15511	2	0.46535	0.061609	0.19074	0.897646	4322	4	0.46535
ADAT2	6	0.026186	0.091485	0.732625	2523	5	-0.31271	0.71364	0.85434	1	16650	1	-0.31271
ADAT3	6	0.08461	0.21762	1	4148	3	-0.35118	0.84626	0.92201	1	17997	2	-0.35118
ADC	6	0.97745	0.97757	1	19880	0	0.28125	0.22835	0.46855	1	9547	4	0.28125
ADCK1	6	0.96665	0.96664	1	19547	0	0.74808	0.0094638	0.042707	0.775634	1092	5	0.74808
ADCK2	6	0.36299	0.57939	1	10035	3	0.038711	0.082939	0.24208	0.910793	5384	3	0.038711
ADCK3	6	0.44417	0.64258	1	11359	2	0.32075	0.13045	0.32392	0.954023	6908	4	0.32075
ADCK4	6	0.33194	0.54537	1	9353	3	0.066176	0.34236	0.59853	1	11868	3	0.066176
ADCK5	6	0.0452	0.13589	0.888785	3092	4	-0.39756	0.81833	0.90628	1	17657	2	-0.39756
ADCY1	6	0.52136	0.6914	1	12423	2	0.16073	0.2547	0.50428	1	10187	4	0.16073
ADCY10	6	0.96424	0.96422	1	19482	0	0.48801	0.062812	0.19372	0.900414	4378	5	0.48801
ADCY2	6	0.92286	0.92413	1	18335	1	0.27943	0.1977	0.4254	0.989567	8765	4	0.27943
ADCY3	6	0.34933	0.5645	1	9741	3	-0.14132	0.58956	0.79402	1	15514	1	-0.14132
ADCY4	6	0.66886	0.79381	1	14770	1	0.22367	0.4325	0.67103	1	13205	3	0.22367
ADCY5	6	0.66063	0.78764	1	14638	1	0.59753	0.014295	0.059882	0.808051	1485	5	0.59753
ADCY6	6	0.7181	0.8299	1	15614	1	0.34489	0.12952	0.32244	0.954023	6870	4	0.34489
ADCY7	6	0.34901	0.56415	1	9731	3	-0.099194	0.7182	0.85648	1	16691	2	-0.099194
ADCY8	6	0.33364	0.54721	1	9391	2	0.47372	0.092671	0.26213	0.922254	5771	4	0.47372
ADCY9	6	0.33777	0.55179	1	9489	2	0.19196	0.26396	0.5167	1	10428	3	0.19196
ADCYAP1	6	0.85001	0.87822	1	17005	1	0.10875	0.60719	0.80748	1	15746	3	0.10875
ADCYAP1R1	6	0.83339	0.87051	1	16809	1	0.13695	0.37107	0.62184	1	12314	3	0.13695
ADD1	6	0.90915	0.91333	1	18032	1	0.5248	0.029877	0.10629	0.858889	2507	5	0.5248
ADD2	6	0.092128	0.2325	1	4333	4	-0.19483	0.33304	0.59096	1	11739	2	-0.19483
ADD3	6	0.45851	0.65141	1	11542	2	0.16531	0.12874	0.3212	0.954023	6847	3	0.16531
ADH1A	6	0.050168	0.14661	0.921999	3215	4	-0.37823	0.62992	0.81807	1	15962	1	-0.37823
ADH1B	6	0.17555	0.36546	1	6251	3	-0.11162	0.24764	0.49465	1	10014	2	-0.11162
ADH4	6	0.99104	0.99111	1	20349	0	0.65611	0.0079847	0.036596	0.762898	944	6	0.65611
ADH5	6	0.53178	0.69834	1	12586	2	0.16054	0.28294	0.54142	1	10890	3	0.16054
ADH6	6	0.9394	0.9395	1	18766	0	0.21881	0.28856	0.54866	1	11019	4	0.21881
ADH7	6	0.66644	0.79196	1	14728	1	0.61864	0.014212	0.059624	0.807552	1479	5	0.61864
ADHFE1	6	0.57598	0.72792	1	13245	2	-0.065092	0.33438	0.59203	1	11756	2	-0.065092
ADI1	6	0.95074	0.9508	1	19115	0	0.48181	0.078682	0.23203	0.909353	5163	5	0.48181
ADIG	6	0.77974	0.8494	1	16200	1	0.54495	0.015018	0.06218	0.814594	1525	4	0.54495
ADIPOQ	6	0.12584	0.2967	1	5259	4	-0.19715	0.734	0.86369	1	16819	1	-0.19715
ADIPOR1	6	0.019474	0.070519	0.639679	2242	5	-0.58758	0.98007	0.98023	1	19599	0	-0.58758
ADIPOR2	6	0.39172	0.61063	1	10647	3	0.090954	0.16564	0.37838	0.972609	7945	3	0.090954
ADIRF	6	0.35096	0.5663	1	9774	2	0.0275	0.50811	0.73092	1	14314	3	0.0275
ADK	6	0.70407	0.82027	1	15393	1	0.22079	0.077393	0.22899	0.909255	5105	5	0.22079
ADM	6	0.95147	0.95156	1	19136	0	0.21874	0.28784	0.54773	1	10992	4	0.21874
ADM2	6	0.54256	0.70547	1	12745	2	0.064805	0.81394	0.90392	1	17605	2	0.064805
ADM5	6	0.64716	0.7779	1	14410	2	0.24864	0.56684	0.77641	1	15177	3	0.24864
ADNP	6	0.9499	0.94995	1	19081	0	0.55231	0.074816	0.22286	0.90855	4979	4	0.55231
ADNP2	6	0.55245	0.71203	1	12891	2	0.0062502	0.65767	0.82961	1	16195	2	0.0062502
ADO	6	0.13434	0.31233	1	5480	3	-0.21483	0.39559	0.64175	1	12691	2	-0.21483
ADORA1	6	0.55023	0.71056	1	12861	2	0.35268	0.0042396	0.020282	0.761191	522	4	0.35268
ADORA2A	6	0.99734	0.99737	1	20581	0	0.63072	0.0026618	0.013136	0.714521	359	6	0.63072
ADORA2B	6	0.60897	0.75073	1	13767	2	0.44428	0.047936	0.15567	0.887526	3582	4	0.44428
ADORA3	6	0.36328	0.5797	1	10043	3	0.12834	0.21655	0.45204	0.998517	9260	3	0.12834
ADPGK	6	0.97345	0.97351	1	19758	0	0.5348	0.022979	0.086269	0.830034	2083	5	0.5348
ADPRH	6	0.97785	0.97796	1	19894	0	0.4317	0.062905	0.19396	0.900414	4386	5	0.4317
ADPRHL1	6	0.11495	0.27638	1	4970	3	-0.14148	0.23209	0.4736	1	9626	2	-0.14148
ADPRHL2	6	0.71423	0.82805	1	15570	2	0.26127	0.11609	0.30084	0.942369	6499	4	0.26127
ADPRM	6	0.073384	0.19508	1	3836	4	-0.34592	0.84232	0.91976	1	17950	1	-0.34592
ADRA1A	6	0.02968	0.10126	0.764154	2673	4	-0.29008	0.91153	0.9455	1	18570	1	-0.29008
ADRA1B	6	0.081903	0.21221	1	4078	4	-0.27864	0.70351	0.84978	1	16561	2	-0.27864
ADRA1D	6	0.36046	0.57658	1	9973	3	0.10013	0.36553	0.6174	1	12228	3	0.10013
ADRA2A	6	0.38261	0.60075	1	10466	2	0.62052	0.09276	0.26228	0.922254	5776	4	0.62052
ADRA2B	6	0.96679	0.96678	1	19551	0	0.26008	0.23576	0.47856	1	9712	3	0.26008
ADRA2C	6	0.61667	0.75625	1	13892	2	0.058514	0.057556	0.18057	0.893537	4115	2	0.058514
ADRB1	6	0.40972	0.62151	1	10879	2	0.050682	0.51399	0.73555	1	14391	3	0.050682
ADRB2	6	0.73756	0.83554	1	15761	1	0.24036	0.26912	0.5235	1	10558	4	0.24036
ADRB3	6	0.095928	0.24004	1	4437	4	-0.38142	0.72547	0.85975	1	16740	2	-0.38142
ADRBK1	6	6.91e-07	6.94e-06	0.002815	51	5	-1.45	0.9918	0.99186	1	19987	0	-1.45
ADRBK2	6	0.096479	0.24113	1	4453	4	-0.36471	0.14729	0.35035	0.963485	7420	2	-0.36471
ADRM1	6	0.01797	0.065667	0.615379	2172	3	-0.33742	0.98103	0.9812	1	19626	0	-0.33742
ADSL	6	0.00015682	0.0008655	0.03851	465	6	-1.3558	0.99971	0.99971	1	20509	0	-1.3558
ADSS	6	0.020732	0.074494	0.658985	2294	3	-0.21104	0.067311	0.20476	0.904083	4612	2	-0.21104
ADSSL1	6	0.40196	0.61684	1	10782	2	-0.051906	0.36859	0.61988	1	12273	2	-0.051906
ADTRP	6	0.25393	0.45718	1	7730	3	-0.20344	0.62901	0.81771	1	15958	2	-0.20344
AEBP1	6	0.23275	0.43261	1	7326	2	-0.027306	0.51389	0.73548	1	14388	2	-0.027306
AEBP2	6	0.0017482	0.0087872	0.171924	1047	6	-0.50941	0.99825	0.99826	1	20331	0	-0.50941
AEN	6	0.0049006	0.021257	0.307918	1412	5	-0.83095	0.99069	0.99075	1	19942	0	-0.83095
AES	6	0.63723	0.77074	1	14235	1	0.45675	0.069391	0.20977	0.905539	4718	5	0.45675
AFAP1	6	0.98446	0.98461	1	20106	0	0.33458	0.0831	0.24246	0.910861	5391	5	0.33458
AFAP1L1	6	0.63975	0.77256	1	14286	2	0.0076679	0.26943	0.5239	1	10567	3	0.0076679
AFAP1L2	6	0.24277	0.44421	1	7518	1	0.29943	0.056565	0.17808	0.893243	4058	5	0.29943
AFF1	6	0.0568	0.1609	0.962062	3376	3	-0.099226	0.68741	0.84252	1	16426	2	-0.099226
AFF2	6	0.65789	0.78563	1	14604	2	0.17846	0.39307	0.63974	1	12652	3	0.17846
AFF3	6	0.0095181	0.037649	0.445332	1729	4	-0.74526	0.22675	0.46633	1	9514	2	-0.74526
AFF4	6	0.5357	0.70086	1	12643	1	0.55069	0.013383	0.057016	0.805138	1413	4	0.55069
AFG3L2	6	0.47296	0.66044	1	11744	2	0.41314	0.075151	0.22366	0.90855	4992	4	0.41314
AFM	6	0.09012	0.22855	1	4285	3	-0.36357	0.50872	0.73139	1	14326	2	-0.36357
AFMID	6	0.99418	0.99422	1	20465	0	0.62603	0.0058225	0.027242	0.761191	705	6	0.62603
AFP	6	0.11872	0.28342	1	5063	2	0.10622	0.49754	0.72254	1	14171	3	0.10622
AFTPH	6	0.27064	0.4764	1	8082	2	0.33407	0.14793	0.35135	0.963792	7436	4	0.33407
AGA	6	0.35157	0.56694	1	9787	2	-0.040803	0.56213	0.77275	1	15111	3	-0.040803
AGAP1	6	0.14555	0.32913	1	5730	3	-0.34061	0.72542	0.85972	1	16739	2	-0.34061
AGAP11	6	0.11859	0.28319	1	5060	3	0.02272	0.16804	0.38197	0.97469	8003	3	0.02272
AGAP2	6	0.18718	0.37934	1	6474	3	-0.42759	0.73285	0.86316	1	16811	2	-0.42759
AGAP3	6	0.81593	0.86307	1	16582	1	0.08534	0.51038	0.73271	1	14349	2	0.08534
AGAP4	6	1.26e-05	8.3e-05	0.010286	167	5	-1.8427	0.99434	0.99437	1	20099	0	-1.8427
AGAP5	3	0.091173	0.17509	0.992459	4310	1	0.37764	0.23945	0.3823	0.974996	9817	2	0.37764
AGAP6	4	0.37681	0.52421	1	10346	2	0.065321	0.35461	0.54784	1	12044	2	0.065321
AGAP9	2	0.044423	0.079694	0.682061	3075	2	-0.90619	0.95558	0.95574	1	19074	0	-0.90619
AGBL1	6	0.035164	0.11371	0.814064	2828	2	-0.055574	0.15116	0.35632	0.965802	7530	2	-0.055574
AGBL2	6	0.422	0.62897	1	11047	1	-0.079312	0.42772	0.66724	1	13129	2	-0.079312
AGBL3	6	0.96141	0.96138	1	19405	0	0.28394	0.15469	0.36177	0.968675	7618	4	0.28394
AGBL4	6	0.63024	0.76576	1	14133	2	0.10315	0.5845	0.79012	1	15436	3	0.10315
AGBL5	6	0.51129	0.68487	1	12272	2	0.30689	0.23267	0.47436	1	9642	4	0.30689
AGER	6	0.52191	0.69175	1	12434	2	0.14625	0.37485	0.62489	1	12395	3	0.14625
AGFG1	6	0.079699	0.20777	1	4008	3	-0.23952	0.79115	0.89188	1	17377	2	-0.23952
AGFG2	6	0.097916	0.2439	1	4510	4	-0.37968	0.37365	0.62389	1	12368	2	-0.37968
AGGF1	6	0.078262	0.20496	1	3972	3	-0.05684	0.61449	0.81177	1	15830	2	-0.05684
AGK	6	0.21474	0.41173	1	6975	3	-0.064644	0.22823	0.46839	1	9544	3	-0.064644
AGL	6	0.30583	0.51618	1	8778	3	0.042085	0.25782	0.50846	1	10255	3	0.042085
AGMAT	6	0.24027	0.44128	1	7467	3	-0.15316	0.067301	0.20473	0.904083	4611	1	-0.15316
AGMO	6	0.5207	0.69097	1	12411	2	0.36611	0.14496	0.34675	0.960611	7364	4	0.36611
AGO1	6	0.092849	0.23394	1	4353	3	-0.15215	0.84853	0.92335	1	18020	2	-0.15215
AGO2	6	0.058488	0.16444	0.970344	3419	4	-0.44471	0.29927	0.5624	1	11232	2	-0.44471
AGO3	6	0.8124	0.86159	1	16537	1	0.12944	0.54098	0.75642	1	14785	3	0.12944
AGO4	6	0.4052	0.61879	1	10814	2	0.13109	0.33346	0.5913	1	11745	3	0.13109
AGPAT1	6	0.34657	0.56141	1	9680	3	0.074159	0.17191	0.38777	0.975177	8107	3	0.074159
AGPAT2	6	0.22595	0.42474	1	7185	2	0.24862	0.3747	0.62476	1	12390	3	0.24862
AGPAT3	6	0.5064	0.68172	1	12203	2	0.15673	0.25891	0.50995	1	10277	4	0.15673
AGPAT4	6	0.87073	0.88892	1	17347	1	0.035416	0.76733	0.87981	1	17124	1	0.035416
AGPAT5	6	0.37641	0.59401	1	10336	2	0.26731	0.076682	0.22731	0.908717	5072	3	0.26731
AGPAT6	6	0.29536	0.50436	1	8578	2	0.69522	0.021493	0.081841	0.829644	1984	4	0.69522
AGPAT9	6	0.92861	0.92919	1	18484	1	0.32183	0.15535	0.36279	0.969183	7632	4	0.32183
AGPHD1	6	0.2952	0.50419	1	8575	1	0.26896	0.19846	0.42649	0.990064	8785	4	0.26896
AGPS	6	0.017595	0.064453	0.609768	2149	4	-0.65382	0.7439	0.86833	1	16900	1	-0.65382
AGR2	6	0.56349	0.71939	1	13046	2	-0.02591	0.71581	0.85535	1	16670	2	-0.02591
AGR3	6	0.28696	0.49489	1	8395	3	-0.092746	0.91767	0.94737	1	18631	1	-0.092746
AGRN	6	0.095038	0.23831	1	4423	2	0.11368	0.41339	0.65587	1	12925	3	0.11368
AGRP	6	0.32273	0.53515	1	9140	3	-0.044216	0.17333	0.38986	0.975177	8145	3	-0.044216
AGT	6	0.98459	0.98474	1	20111	0	0.3043	0.093706	0.26387	0.922854	5805	4	0.3043
AGTPBP1	6	0.97897	0.97911	1	19932	0	0.57436	0.012107	0.052973	0.797845	1325	5	0.57436
AGTR1	6	0.98191	0.98211	1	20026	0	0.23388	0.07133	0.21453	0.906151	4812	5	0.23388
AGTR2	6	0.44105	0.64066	1	11319	1	0.3566	0.086823	0.25101	0.913446	5566	4	0.3566
AGTRAP	6	0.51048	0.68437	1	12259	2	0.10682	0.2423	0.48751	1	9888	3	0.10682
AGXT	6	0.36874	0.58567	1	10175	3	-0.14048	0.18116	0.40137	0.977578	8368	2	-0.14048
AGXT2	6	0.36491	0.5815	1	10090	3	-0.074171	0.51561	0.73683	1	14417	2	-0.074171
AGXT2L1	6	0.81017	0.86069	1	16521	1	0.34977	0.10375	0.28068	0.935096	6109	4	0.34977
AGXT2L2	6	0.85186	0.87913	1	17030	1	0.27735	0.051325	0.16458	0.890245	3769	5	0.27735
AHCTF1	6	0.048919	0.14393	0.915664	3181	3	-0.10168	0.3593	0.61231	1	12124	3	-0.10168
AHCY	6	4.56e-08	2.39e-07	0.000248	18	6	-1.8956	0.99999	0.99999	1	20627	0	-1.8956
AHCYL1	6	0.0049954	0.021592	0.310379	1424	5	-0.72546	0.82786	0.91157	1	17771	1	-0.72546
AHCYL2	6	0.90461	0.91006	1	17934	1	0.58663	0.020463	0.07877	0.828035	1912	5	0.58663
AHDC1	6	0.99484	0.99487	1	20483	0	0.9254	0.005157	0.024318	0.761191	630	6	0.9254
AHI1	6	0.26856	0.47408	1	8036	3	-0.13931	0.4631	0.69538	1	13697	2	-0.13931
AHNAK	6	0.15772	0.34403	1	5949	1	0.072958	0.44231	0.67889	1	13366	2	0.072958
AHNAK2	6	0.61409	0.75436	1	13840	1	0.24223	0.21519	0.45016	0.997685	9235	4	0.24223
AHR	6	0.23739	0.43796	1	7418	3	-0.14919	0.72588	0.85993	1	16746	2	-0.14919
AHRR	6	0.0599	0.16737	0.974987	3464	4	-0.39833	0.52145	0.74134	1	14508	2	-0.39833
AHSA1	6	0.94183	0.94195	1	18842	0	0.70138	0.0096379	0.043426	0.777096	1103	5	0.70138
AHSA2	6	0.54612	0.70783	1	12800	2	0.34751	0.09476	0.26571	0.923938	5840	3	0.34751
AHSG	6	0.43908	0.6394	1	11288	1	0.35886	0.087355	0.25226	0.914763	5582	5	0.35886
AHSP	6	0.76259	0.8435	1	16001	1	0.73615	0.03763	0.12793	0.880623	2948	4	0.73615
AICDA	6	0.51599	0.68794	1	12346	2	0.18121	0.20041	0.42927	0.990915	8843	4	0.18121
AIDA	6	0.18551	0.37734	1	6441	2	0.086122	0.40861	0.65208	1	12863	3	0.086122
AIF1	6	0.33751	0.55151	1	9478	2	0.4385	0.067903	0.20618	0.905028	4642	4	0.4385
AIF1L	6	0.79072	0.85332	1	16292	1	0.18873	0.12144	0.30943	0.948011	6644	3	0.18873
AIFM1	6	5.7e-07	5.5e-06	0.002372	48	6	-1.8244	0.99942	0.99942	1	20464	0	-1.8244
AIFM2	6	0.080924	0.21018	1	4044	4	-0.482	0.55293	0.76566	1	14983	1	-0.482
AIFM3	6	0.10988	0.26682	1	4841	3	-0.19268	0.84313	0.92023	1	17958	2	-0.19268
AIG1	6	0.63301	0.76775	1	14172	1	0.46214	0.16122	0.37173	0.971444	7814	4	0.46214
AIM1	6	0.5168	0.68848	1	12359	1	0.13918	0.31739	0.57809	1	11504	3	0.13918
AIM2	6	0.682	0.80355	1	15004	2	0.22021	0.2351	0.47765	1	9698	4	0.22021
AIMP1	6	0.79159	0.85364	1	16305	1	0.05491	0.16163	0.37235	0.971638	7825	2	0.05491
AIMP2	6	0.8824	0.89557	1	17535	1	0.17421	0.24292	0.48833	1	9898	3	0.17421
AIP	6	0.048316	0.14265	0.911886	3168	4	-0.36022	0.17788	0.39658	0.975569	8284	2	-0.36022
AIPL1	6	0.50644	0.68174	1	12205	2	0.053776	0.37517	0.62515	1	12398	3	0.053776
AIRE	6	0.69563	0.81377	1	15239	2	0.0095797	0.65868	0.83006	1	16207	2	0.0095797
AJAP1	6	0.56427	0.7199	1	13067	2	0.28996	0.14666	0.34934	0.962568	7403	3	0.28996
AJUBA	6	0.16557	0.35349	1	6075	3	-0.18972	0.090263	0.25804	0.918694	5697	2	-0.18972
AK1	6	0.26167	0.46619	1	7890	2	0.23904	0.22991	0.47064	1	9579	3	0.23904
AK2	6	0.22265	0.42088	1	7121	2	-0.0041486	0.85404	0.9266	1	18094	2	-0.0041486
AK3	6	0.079229	0.20687	1	3996	4	-0.2272	0.37152	0.6222	1	12323	2	-0.2272
AK4	6	0.13656	0.31643	1	5543	3	-0.38076	0.61994	0.81405	1	15880	1	-0.38076
AK5	6	0.91949	0.92133	1	18262	1	0.04784	0.80587	0.8996	1	17516	2	0.04784
AK6	6	0.00038691	0.0020617	0.068504	619	6	-2.8986	0.99895	0.99894	1	20405	0	-2.8986
AK7	6	0.48622	0.66884	1	11924	2	0.41585	0.12119	0.30903	0.948011	6631	4	0.41585
AK8	6	0.643	0.77486	1	14337	1	0.72613	0.0011538	0.0059384	0.680397	170	5	0.72613
AK9	6	0.87168	0.88943	1	17359	1	0.41731	0.11849	0.30472	0.943599	6568	4	0.41731
AKAP1	6	0.99153	0.99159	1	20359	0	0.63359	0.0084733	0.038613	0.765634	999	6	0.63359
AKAP10	6	0.22144	0.41942	1	7097	2	0.2484	0.13995	0.33895	0.957267	7219	4	0.2484
AKAP11	6	0.46463	0.65529	1	11635	2	-0.022517	0.47532	0.70503	1	13855	2	-0.022517
AKAP12	6	0.24225	0.44362	1	7511	3	-0.081361	0.60052	0.80243	1	15666	3	-0.081361
AKAP13	6	0.37811	0.59588	1	10371	1	0.2948	0.047002	0.15321	0.886571	3521	3	0.2948
AKAP14	6	0.58683	0.73536	1	13416	1	0.12153	0.20688	0.43846	0.993006	9011	3	0.12153
AKAP17A_X	6	0.24257	0.44398	1	7516	3	-0.081864	0.82117	0.90783	1	17685	2	-0.081864
AKAP2	6	0.71195	0.8263	1	15536	2	0.14451	0.44443	0.68058	1	13406	3	0.14451
AKAP3	6	0.72972	0.83317	1	15694	1	0.22853	0.28669	0.54627	1	10968	3	0.22853
AKAP4	6	0.94655	0.94661	1	18974	0	0.52109	0.041526	0.13862	0.880623	3192	4	0.52109
AKAP5	6	0.97284	0.97286	1	19731	0	0.71218	0.0057296	0.026826	0.761191	698	5	0.71218
AKAP6	6	0.47174	0.65969	1	11726	1	0.5176	0.040472	0.13572	0.880623	3121	4	0.5176
AKAP7	6	0.9229	0.92417	1	18337	1	0.20517	0.049776	0.16046	0.888815	3682	5	0.20517
AKAP8	6	0.68273	0.80409	1	15017	1	-0.015309	0.91923	0.94787	1	18644	1	-0.015309
AKAP8L	6	0.33039	0.54367	1	9319	3	-0.073325	0.72834	0.86104	1	16763	2	-0.073325
AKAP9	6	0.32505	0.53772	1	9189	3	-0.075534	0.59758	0.80018	1	15629	3	-0.075534
AKIP1	6	0.25071	0.45334	1	7676	2	0.037955	0.20431	0.43488	0.993006	8940	2	0.037955
AKIRIN1	6	0.038372	0.12088	0.839679	2920	4	-0.57613	0.69972	0.84806	1	16524	1	-0.57613
AKIRIN2	6	0.01181	0.045384	0.495224	1868	4	-0.60214	0.03009	0.10689	0.859742	2522	2	-0.60214
AKNA	6	0.91363	0.91672	1	18126	1	0.40851	0.051849	0.16595	0.890472	3800	4	0.40851
AKNAD1	6	0.55635	0.71461	1	12944	2	0.066965	0.18268	0.40358	0.978542	8407	2	0.066965
AKR1A1	6	0.34381	0.55839	1	9616	1	0.21818	0.11137	0.29318	0.939042	6353	3	0.21818
AKR1B1	6	0.32604	0.53882	1	9214	2	0.047008	0.36929	0.62043	1	12282	2	0.047008
AKR1B10	6	0.26654	0.47171	1	7988	3	-0.19696	0.65559	0.82874	1	16178	2	-0.19696
AKR1B15	6	0.34266	0.55714	1	9598	3	0.0016591	0.38387	0.63225	1	12518	3	0.0016591
AKR1C1	6	0.42528	0.63096	1	11103	2	0.28127	0.061711	0.191	0.897646	4329	3	0.28127
AKR1C2	5	0.71826	0.78528	1	15615	1	0.55966	0.049787	0.1481	0.884307	3683	4	0.55966
AKR1C3	6	0.85299	0.87969	1	17053	1	0.39894	0.020925	0.080121	0.82925	1941	5	0.39894
AKR1C4	6	0.98935	0.98942	1	20299	0	0.53339	0.009416	0.042516	0.775634	1083	6	0.53339
AKR1D1	6	0.97816	0.97829	1	19904	0	0.35184	0.070214	0.21178	0.906118	4755	5	0.35184
AKR1E2	6	0.01296	0.049262	0.521873	1923	5	-0.28173	0.99687	0.99693	1	20240	0	-0.28173
AKR7A2	6	0.34618	0.56098	1	9674	2	0.13392	0.08962	0.25695	0.917835	5679	3	0.13392
AKR7A3	6	0.92271	0.92403	1	18329	1	0.5523	0.023265	0.087117	0.830034	2109	4	0.5523
AKT1	6	0.68575	0.80632	1	15068	2	-0.0095314	0.14056	0.33988	0.957267	7237	2	-0.0095314
AKT1S1	6	0.20545	0.4009	1	6833	3	-0.29707	0.97514	0.9756	1	19455	1	-0.29707
AKT2	6	0.0017932	0.0089896	0.173742	1060	5	-1.1134	0.25439	0.50389	1	10175	1	-1.1134
AKT3	6	0.80611	0.85912	1	16474	1	0.54449	0.021229	0.081051	0.829644	1956	5	0.54449
AKTIP	6	0.3168	0.52851	1	9008	2	0.14159	0.20294	0.43293	0.992719	8903	3	0.14159
ALAD	6	6.73e-05	0.00035754	0.022427	330	5	-1.1194	0.93611	0.95378	1	18828	1	-1.1194
ALAS1	6	0.00050792	0.0026773	0.081501	677	5	-1.1113	0.86663	0.93414	1	18256	1	-1.1113
ALAS2	6	0.1799	0.37067	1	6338	2	0.3853	0.057901	0.18146	0.893537	4133	4	0.3853
ALB	6	0.60898	0.75074	1	13768	1	-0.0046219	0.32369	0.5833	1	11609	2	-0.0046219
ALCAM	6	0.21878	0.41636	1	7042	3	-0.14374	0.56503	0.77498	1	15154	2	-0.14374
ALDH16A1	6	0.061047	0.16981	0.980542	3495	3	-0.32953	0.098996	0.27285	0.931077	5965	1	-0.32953
ALDH18A1	6	0.46978	0.6585	1	11701	2	0.34011	0.21274	0.44672	0.995853	9168	4	0.34011
ALDH1A1	6	0.23365	0.43361	1	7343	3	-0.20929	0.99198	0.99208	1	19994	0	-0.20929
ALDH1A2	6	0.69463	0.81301	1	15222	2	0.28625	0.18488	0.4068	0.980306	8463	4	0.28625
ALDH1A3	6	0.46261	0.65397	1	11603	2	0.31126	0.17817	0.397	0.97597	8290	3	0.31126
ALDH1B1	6	0.93156	0.93187	1	18563	1	0.24541	0.07998	0.23507	0.910182	5222	5	0.24541
ALDH1L1	6	0.13939	0.32158	1	5622	3	-0.083285	0.082107	0.24011	0.910182	5340	3	-0.083285
ALDH1L2	6	0.71516	0.82878	1	15590	1	0.069524	0.31116	0.57294	1	11421	3	0.069524
ALDH2	6	0.39539	0.61296	1	10697	2	0.25402	0.28745	0.54723	1	10982	4	0.25402
ALDH3A1	6	0.8467	0.87662	1	16965	1	0.51961	0.029753	0.10595	0.858889	2492	5	0.51961
ALDH3A2	6	0.6877	0.80778	1	15106	2	0.055933	0.38977	0.63706	1	12601	3	0.055933
ALDH3B1	6	0.94471	0.94479	1	18922	0	0.28888	0.1958	0.42264	0.988904	8711	4	0.28888
ALDH3B2	6	0.30264	0.51257	1	8716	2	0.077991	0.53135	0.74907	1	14649	2	0.077991
ALDH4A1	6	0.24751	0.44961	1	7621	3	-0.17317	0.79273	0.89269	1	17398	2	-0.17317
ALDH5A1	6	0.59182	0.73885	1	13505	1	0.20497	0.26221	0.51437	1	10379	4	0.20497
ALDH6A1	6	0.94465	0.94474	1	18920	0	0.41747	0.078418	0.23142	0.909353	5153	5	0.41747
ALDH7A1	6	0.59729	0.74262	1	13590	2	0.21102	0.22626	0.46563	1	9505	3	0.21102
ALDH8A1	6	0.66478	0.79071	1	14703	2	0.050632	0.29435	0.55616	1	11132	3	0.050632
ALDH9A1	6	0.70588	0.82167	1	15421	1	0.56603	0.019109	0.074692	0.825026	1822	5	0.56603
ALDOA	6	3.43e-06	2.56e-05	0.005233	97	6	-1.4772	0.9997	0.99971	1	20507	0	-1.4772
ALDOB	6	0.88635	0.89794	1	17608	1	0.63264	0.0059566	0.027826	0.761191	718	5	0.63264
ALDOC	6	0.073288	0.19489	1	3833	2	0.11968	0.52813	0.74654	1	14596	3	0.11968
ALG1	6	0.0011836	0.0060791	0.134585	926	5	-1.1329	0.86232	0.93154	1	18199	1	-1.1329
ALG10	6	0.11642	0.27914	1	5010	2	0.22719	0.27697	0.53369	1	10752	3	0.22719
ALG10B	6	0.59829	0.74331	1	13609	2	0.034678	0.022901	0.086033	0.830034	2076	1	0.034678
ALG11	6	0.015408	0.057344	0.57068	2046	3	-0.74616	0.65063	0.82671	1	16135	2	-0.74616
ALG12	6	0.083586	0.21554	1	4119	4	-0.38921	0.82303	0.90886	1	17705	2	-0.38921
ALG13	6	0.0016869	0.0084979	0.168331	1034	2	0.017814	0.53686	0.75328	1	14725	3	0.017814
ALG14	6	0.0033575	0.015574	0.248803	1281	4	-0.63597	0.85653	0.92805	1	18131	2	-0.63597
ALG1L	6	0.013432	0.05081	0.532276	1943	4	-0.74894	0.59832	0.80073	1	15635	2	-0.74894
ALG2	6	0.00034853	0.0018599	0.064274	597	5	-1.0089	0.93487	0.95329	1	18806	1	-1.0089
ALG3	6	0.78471	0.85115	1	16238	1	0.3726	0.048926	0.15823	0.888658	3634	5	0.3726
ALG5	6	0.34093	0.55523	1	9559	3	-0.084436	0.16197	0.37288	0.9722	7832	3	-0.084436
ALG6	6	0.19168	0.38466	1	6570	3	-0.21729	0.98496	0.98511	1	19746	0	-0.21729
ALG8	6	0.96215	0.96213	1	19420	0	0.23192	0.22857	0.46884	1	9549	4	0.23192
ALG9	6	0.36936	0.58633	1	10191	2	0.24208	0.29159	0.55262	1	11076	3	0.24208
ALK	6	0.99259	0.99266	1	20395	0	0.46794	0.0074103	0.03416	0.761407	894	6	0.46794
ALKBH1	6	0.66181	0.78851	1	14654	2	0.15599	0.20989	0.44268	0.993825	9094	3	0.15599
ALKBH2	6	0.38282	0.60099	1	10474	2	0.15909	0.53576	0.75245	1	14715	3	0.15909
ALKBH3	6	0.1541	0.33961	1	5874	2	0.15122	0.45299	0.68741	1	13550	3	0.15122
ALKBH4	6	0.90643	0.91136	1	17977	1	0.35145	0.035661	0.12246	0.878335	2838	5	0.35145
ALKBH5	6	0.51167	0.68511	1	12276	2	0.19107	0.25996	0.51136	1	10315	4	0.19107
ALKBH6	6	0.97342	0.97347	1	19757	0	0.59516	0.045011	0.1479	0.884307	3418	4	0.59516
ALKBH7	6	0.15172	0.3367	1	5827	3	-0.25852	0.66548	0.83297	1	16259	1	-0.25852
ALKBH8	6	0.15686	0.34297	1	5932	3	0.061917	0.39358	0.64013	1	12660	3	0.061917
ALLC	6	0.20368	0.39887	1	6798	3	-0.19231	0.23128	0.47252	1	9607	2	-0.19231
ALMS1	6	0.97286	0.97289	1	19732	0	0.35623	0.056295	0.17739	0.893243	4043	5	0.35623
ALOX12	6	0.64019	0.77286	1	14301	1	0.10714	0.58789	0.79274	1	15484	3	0.10714
ALOX12B	6	0.94848	0.94855	1	19033	0	0.38972	0.093337	0.26324	0.922854	5794	4	0.38972
ALOX15	6	0.26729	0.47257	1	8007	3	-0.056982	0.5959	0.79891	1	15608	2	-0.056982
ALOX15B	6	0.98674	0.98682	1	20192	0	0.55447	0.062239	0.19232	0.898772	4355	5	0.55447
ALOX5	6	0.44937	0.64583	1	11433	2	-0.026051	0.73878	0.86592	1	16857	2	-0.026051
ALOX5AP	6	0.95793	0.95789	1	19302	0	0.12802	0.012514	0.054278	0.800462	1349	3	0.12802
ALOXE3	6	0.98091	0.98108	1	19990	0	0.4188	0.056934	0.17902	0.893243	4075	5	0.4188
ALPI	6	0.59245	0.73929	1	13510	2	0.055549	0.8089	0.90119	1	17556	2	0.055549
ALPK1	6	0.95305	0.95312	1	19169	0	0.24836	0.20701	0.43866	0.993006	9018	3	0.24836
ALPK2	6	0.52852	0.69615	1	12534	2	0.56692	0.064667	0.19833	0.902688	4471	4	0.56692
ALPK3	6	0.99007	0.99016	1	20320	0	0.47419	0.0099319	0.044646	0.778921	1131	6	0.47419
ALPL	6	0.70357	0.81991	1	15387	2	0.1148	0.25233	0.50106	1	10117	3	0.1148
ALPP	6	0.14842	0.33262	1	5780	3	-0.2042	0.13829	0.33632	0.956819	7163	2	-0.2042
ALPPL2	6	0.68169	0.8033	1	14992	2	-0.10801	0.38978	0.63707	1	12602	2	-0.10801
ALS2	6	0.34404	0.55864	1	9620	3	-0.032763	0.41408	0.6564	1	12933	2	-0.032763
ALS2CL	6	0.62979	0.76544	1	14119	2	0.6001	0.004666	0.022183	0.761191	574	4	0.6001
ALS2CR11	6	0.96689	0.96687	1	19553	0	0.37022	0.12988	0.32302	0.954023	6887	4	0.37022
ALS2CR12	6	0.99228	0.99236	1	20386	0	0.5772	0.0077173	0.035473	0.761838	924	6	0.5772
ALS2CR8	6	0.84708	0.87678	1	16968	1	0.15897	0.3454	0.60103	1	11904	3	0.15897
ALX1	6	0.97272	0.97275	1	19726	0	0.16268	0.37102	0.62179	1	12311	3	0.16268
ALX3	6	0.37377	0.59107	1	10279	3	0.053844	0.16783	0.38166	0.974523	7998	3	0.053844
ALX4	6	0.63685	0.77047	1	14229	2	0.10242	0.56396	0.77415	1	15137	2	0.10242
ALYREF	6	0.076694	0.20183	1	3932	4	-0.4042	0.63172	0.81882	1	15982	2	-0.4042
AMACR	6	0.47706	0.66308	1	11797	2	0.10212	0.41415	0.65646	1	12935	3	0.10212
AMBN	6	0.69004	0.80958	1	15149	2	0.11523	0.47869	0.7077	1	13904	3	0.11523
AMBP	6	0.084463	0.21733	1	4145	1	0.28253	0.21911	0.45558	0.999314	9331	4	0.28253
AMBRA1	6	0.99722	0.99726	1	20570	0	1.7169	7.68e-07	7.41e-06	0.028996	5	6	1.7169
AMD1	6	0.98948	0.98958	1	20303	0	0.64616	0.010517	0.047015	0.78356	1191	6	0.64616
AMDHD1	6	0.23301	0.43292	1	7331	3	-0.13462	0.45865	0.69186	1	13625	2	-0.13462
AMDHD2	6	0.21127	0.40768	1	6920	2	0.55374	0.083956	0.2444	0.911747	5429	4	0.55374
AMELX	6	0.5792	0.73011	1	13294	2	0.21089	0.33097	0.58928	1	11709	3	0.21089
AMELY	5	0.38032	0.55507	1	10420	2	0.0066784	0.65096	0.79444	1	16141	2	0.0066784
AMER1	6	0.73404	0.83448	1	15721	1	0.23864	0.2608	0.51251	1	10335	4	0.23864
AMER2	6	0.59169	0.73875	1	13499	2	0.22356	0.15557	0.36312	0.969183	7640	4	0.22356
AMER3	6	0.33627	0.55013	1	9440	2	0.21055	0.34982	0.60466	1	11970	3	0.21055
AMFR	6	0.13018	0.30473	1	5370	3	-0.54594	0.29405	0.55577	1	11124	2	-0.54594
AMH	6	0.42764	0.63235	1	11140	2	0.057786	0.49817	0.72304	1	14180	3	0.057786
AMHR2	6	0.37159	0.58872	1	10235	2	0.11437	0.46109	0.6938	1	13665	3	0.11437
AMICA1	6	0.14534	0.32886	1	5728	2	0.29236	0.098521	0.27199	0.930164	5947	3	0.29236
AMIGO1	6	0.43893	0.6393	1	11284	2	0.28015	0.17154	0.3872	0.975177	8096	4	0.28015
AMIGO2	6	0.67165	0.79586	1	14822	2	0.21232	0.078274	0.23108	0.909353	5143	3	0.21232
AMIGO3	6	0.64783	0.77841	1	14421	1	0.1998	0.32333	0.58302	1	11604	3	0.1998
AMMECR1	6	0.85772	0.8821	1	17130	1	0.38787	0.051594	0.16527	0.890245	3784	4	0.38787
AMMECR1L	6	0.082867	0.21415	1	4100	4	-0.50242	0.54178	0.75706	1	14799	2	-0.50242
AMN	6	0.48921	0.67075	1	11957	2	0.41902	0.11794	0.30382	0.943599	6551	4	0.41902
AMN1	6	0.87183	0.88951	1	17364	1	0.019456	0.80045	0.89671	1	17473	2	0.019456
AMOT	6	0.94964	0.94967	1	19072	0	0.018128	0.35424	0.60819	1	12037	2	0.018128
AMOTL1	6	0.4631	0.6543	1	11609	1	0.57062	0.012151	0.0531	0.797845	1328	5	0.57062
AMOTL2	6	0.76956	0.84588	1	16088	1	0.082838	0.030284	0.10745	0.860939	2533	3	0.082838
AMPD1	6	0.94842	0.94848	1	19031	0	0.32614	0.12424	0.31396	0.950457	6727	4	0.32614
AMPD2	6	0.58368	0.73316	1	13362	1	0.28977	0.15584	0.36354	0.969183	7648	4	0.28977
AMPD3	6	0.878	0.89298	1	17461	1	0.59409	0.002988	0.014615	0.724107	401	5	0.59409
AMPH	6	0.8453	0.87597	1	16947	1	0.26186	0.0034475	0.016729	0.741576	450	4	0.26186
AMT	6	0.19553	0.38921	1	6627	2	0.22389	0.23256	0.47422	1	9638	4	0.22389
AMTN	6	0.40467	0.61848	1	10806	2	0.089611	0.83094	0.91331	1	17814	2	0.089611
AMY1A	6	0.12033	0.28643	1	5117	3	-0.09648	0.50891	0.73154	1	14329	3	-0.09648
AMY1B	2	0.53815	0.54051	1	12682	1	-0.17967	0.43652	0.48797	1	13263	1	-0.17967
AMY1C	3	0.029974	0.075288	0.663095	2682	2	-1.2961	0.16227	0.29737	0.941322	7844	1	-1.2961
AMY2A	4	0.052609	0.12801	0.860016	3286	3	-0.41013	0.96778	0.96772	1	19288	0	-0.41013
AMY2B	4	0.60397	0.6785	1	13695	1	0.62641	0.07999	0.1972	0.902688	5223	3	0.62641
AMZ1	6	0.084733	0.21787	1	4153	3	0.12687	0.19896	0.42719	0.990064	8798	3	0.12687
AMZ2	6	0.50366	0.67994	1	12166	2	0.3503	0.045722	0.14982	0.886571	3448	3	0.3503
ANAPC1	6	0.017021	0.062586	0.600045	2121	3	-0.49769	0.64775	0.8255	1	16106	2	-0.49769
ANAPC10	6	0.0027852	0.013456	0.223727	1227	5	-0.88844	0.28958	0.55005	1	11038	1	-0.88844
ANAPC11	6	0.028976	0.099648	0.760029	2646	2	0.25697	0.3201	0.58037	1	11547	3	0.25697
ANAPC13	6	0.10145	0.25071	1	4598	4	-0.22029	0.77671	0.88454	1	17220	2	-0.22029
ANAPC15	6	0.015763	0.058509	0.578383	2058	5	-0.35664	0.44659	0.68229	1	13449	1	-0.35664
ANAPC16	6	0.54655	0.70811	1	12805	2	0.13007	0.15176	0.35727	0.966589	7542	3	0.13007
ANAPC2	6	0.00012747	0.00069379	0.032962	434	5	-0.95035	0.65086	0.82682	1	16139	1	-0.95035
ANAPC4	6	0.0026047	0.012806	0.216757	1203	5	-1.3769	0.99706	0.99712	1	20248	0	-1.3769
ANAPC5	6	0.00012923	0.00070383	0.032962	442	6	-1.627	0.99987	0.99987	1	20543	0	-1.627
ANAPC7	6	0.020842	0.074813	0.659829	2298	5	-0.5808	0.96364	0.96717	1	19208	1	-0.5808
ANG	6	0.32972	0.54292	1	9308	3	-0.05164	0.094112	0.26457	0.923368	5819	3	-0.05164
ANGEL1	6	0.13836	0.3197	1	5592	4	-0.20494	0.93736	0.9543	1	18841	1	-0.20494
ANGEL2	6	0.11919	0.2843	1	5079	3	-0.16846	0.36012	0.61297	1	12142	3	-0.16846
ANGPT1	6	0.67661	0.79953	1	14912	2	-0.034452	0.9815	0.98167	1	19640	0	-0.034452
ANGPT2	6	0.14363	0.32681	1	5699	3	0.032728	0.16365	0.37541	0.972609	7878	3	0.032728
ANGPT4	6	0.52889	0.69642	1	12539	1	0.71186	0.0047169	0.022402	0.761191	578	4	0.71186
ANGPTL1	6	0.32695	0.53984	1	9233	2	0.33885	0.14054	0.33985	0.957267	7236	4	0.33885
ANGPTL2	6	0.94882	0.94887	1	19043	0	0.24671	0.24577	0.49217	1	9961	4	0.24671
ANGPTL3	6	0.96917	0.96917	1	19628	0	0.82335	0.0025999	0.012851	0.714521	345	5	0.82335
ANGPTL4	6	0.95855	0.95851	1	19322	0	0.32159	0.14872	0.35254	0.963792	7459	4	0.32159
ANGPTL5	6	0.87142	0.88928	1	17355	1	0.17194	0.093373	0.26331	0.922854	5796	3	0.17194
ANGPTL6	6	0.20115	0.39589	1	6741	3	0.2824	0.068659	0.20801	0.905539	4676	3	0.2824
ANGPTL7	6	0.33816	0.5522	1	9500	2	0.25965	0.51908	0.73951	1	14467	3	0.25965
ANHX	6	0.89343	0.90253	1	17722	1	0.62247	0.034379	0.11896	0.874403	2774	4	0.62247
ANK1	6	0.18288	0.37418	1	6397	3	-0.13971	0.53781	0.75403	1	14734	3	-0.13971
ANK2	6	0.85665	0.88156	1	17112	1	0.4888	0.011211	0.049771	0.787662	1263	5	0.4888
ANK3	6	0.48302	0.66678	1	11877	1	0.14407	0.38334	0.63183	1	12507	2	0.14407
ANKAR	6	0.97158	0.97163	1	19695	0	0.51289	0.024459	0.090639	0.832766	2195	5	0.51289
ANKDD1A	6	0.10739	0.26207	1	4766	4	-0.35684	0.34935	0.60428	1	11966	2	-0.35684
ANKDD1B	6	0.61159	0.75261	1	13800	2	0.24346	0.21062	0.44371	0.993825	9119	4	0.24346
ANKEF1	6	0.87735	0.89261	1	17450	1	0.45259	0.021304	0.08128	0.829644	1965	5	0.45259
ANKFN1	6	0.9862	0.98631	1	20176	0	0.26858	0.086767	0.2509	0.913446	5563	5	0.26858
ANKFY1	6	0.058922	0.16537	0.971816	3432	4	-0.28097	0.52971	0.7478	1	14626	2	-0.28097
ANKH	6	0.038005	0.12006	0.837635	2906	2	0.20005	0.29961	0.56281	1	11238	3	0.20005
ANKHD1	6	0.55031	0.71062	1	12862	1	0.217	0.29559	0.5577	1	11156	3	0.217
ANKHD1-EIF4EBP3	4	0.050908	0.12472	0.85149	3235	3	-0.37314	0.42882	0.60537	1	13149	1	-0.37314
ANKIB1	6	0.89218	0.90169	1	17704	1	0.05005	0.5845	0.79012	1	15437	2	0.05005
ANKK1	6	0.68782	0.80787	1	15108	2	0.26253	0.021683	0.082408	0.830034	1995	3	0.26253
ANKLE2	6	0.03101	0.10431	0.775569	2719	4	-0.50564	0.62891	0.81767	1	15954	2	-0.50564
ANKMY1	6	0.28977	0.49809	1	8451	2	-0.0011013	0.61384	0.81153	1	15823	1	-0.0011013
ANKMY2	6	0.85662	0.88154	1	17111	1	0.7591	0.00085783	0.0044949	0.653775	132	5	0.7591
ANKRA2	6	0.85307	0.87973	1	17054	1	0.30723	0.17181	0.38762	0.975177	8103	3	0.30723
ANKRD1	6	0.99938	0.99939	1	20667	0	0.88933	0.00061988	0.0032633	0.610257	100	6	0.88933
ANKRD10	6	0.17943	0.37008	1	6327	3	0.070241	0.019723	0.076573	0.827779	1860	3	0.070241
ANKRD11	6	0.9823	0.98249	1	20041	0	0.58301	0.07404	0.22102	0.908181	4943	5	0.58301
ANKRD12	6	0.30606	0.51644	1	8780	3	-0.095507	0.69047	0.84391	1	16455	1	-0.095507
ANKRD13A	6	0.63098	0.76628	1	14140	2	0.0035995	0.034018	0.11797	0.873034	2753	3	0.0035995
ANKRD13B	6	0.88484	0.89702	1	17582	1	0.71837	0.022516	0.084858	0.830034	2046	4	0.71837
ANKRD13C	6	0.99727	0.9973	1	20576	0	0.66239	0.0015348	0.0077598	0.680397	219	6	0.66239
ANKRD13D	6	0.74186	0.83686	1	15791	1	0.2551	0.1946	0.42091	0.987746	8692	4	0.2551
ANKRD16	6	0.03376	0.11056	0.801881	2790	4	-0.48616	0.25599	0.50598	1	10210	2	-0.48616
ANKRD17	6	0.00014241	0.00077893	0.035672	452	6	-1.9045	0.99885	0.99884	1	20391	0	-1.9045
ANKRD18A	6	0.11071	0.26839	1	4863	3	-0.23678	0.11509	0.29922	0.942025	6467	3	-0.23678
ANKRD18B	6	0.24333	0.44486	1	7530	2	0.46142	0.10782	0.28733	0.937045	6242	4	0.46142
ANKRD2	6	0.55523	0.71386	1	12924	2	0.13847	0.35143	0.60597	1	12000	3	0.13847
ANKRD20A1	6	0.0036045	0.0165	0.259536	1297	4	-0.62022	0.59825	0.80068	1	15634	1	-0.62022
ANKRD20A2	1	0.312	0.3121	1	8918	1	-0.13413	0.688	0.68798	1	16431	0	-0.13413
ANKRD20A3	2	0.097045	0.16509	0.971684	4474	1	-0.77402	0.60024	0.61205	1	15661	1	-0.77402
ANKRD22	6	0.61611	0.75584	1	13873	2	0.26445	0.18308	0.40415	0.978706	8420	4	0.26445
ANKRD23	6	0.32455	0.53718	1	9178	1	0.34063	0.032736	0.11435	0.867851	2682	3	0.34063
ANKRD24	6	0.14112	0.32368	1	5652	3	-0.2538	0.088379	0.25465	0.916565	5635	2	-0.2538
ANKRD26	6	0.37554	0.59306	1	10316	3	0.27921	0.13971	0.33858	0.957267	7211	3	0.27921
ANKRD27	6	0.94993	0.94997	1	19082	0	-0.047115	0.35753	0.61087	1	12091	2	-0.047115
ANKRD28	6	0.15523	0.34099	1	5891	3	-0.04193	0.098905	0.27269	0.931077	5962	3	-0.04193
ANKRD29	6	0.86203	0.88429	1	17193	1	0.40444	0.1161	0.30086	0.942369	6500	4	0.40444
ANKRD30A	6	0.93182	0.93214	1	18572	1	0.32928	0.030509	0.1081	0.860939	2551	5	0.32928
ANKRD30B	6	0.068137	0.18441	1	3687	3	-0.19755	0.74926	0.87093	1	16948	2	-0.19755
ANKRD32	6	0.45409	0.64871	1	11498	2	-0.050678	0.68479	0.84139	1	16410	2	-0.050678
ANKRD33	6	0.9887	0.9888	1	20277	0	0.57275	0.0044604	0.021297	0.761191	553	6	0.57275
ANKRD33B	6	0.9598	0.95973	1	19356	0	0.48595	0.051456	0.16491	0.890245	3776	4	0.48595
ANKRD34A	6	0.85386	0.88012	1	17068	1	0.055766	0.60969	0.80932	1	15770	3	0.055766
ANKRD34B	6	0.58949	0.73719	1	13459	1	0.41245	0.081975	0.23981	0.910182	5330	4	0.41245
ANKRD34C	6	0.54672	0.70824	1	12810	1	0.4307	0.13817	0.33614	0.956819	7158	4	0.4307
ANKRD35	6	0.88975	0.90007	1	17663	1	0.69671	0.003922	0.018866	0.761191	496	4	0.69671
ANKRD36	6	0.16789	0.3563	1	6112	3	-0.067935	0.51395	0.73552	1	14390	2	-0.067935
ANKRD37	6	0.97699	0.9771	1	19858	0	0.18311	0.251	0.49922	1	10084	4	0.18311
ANKRD39	6	0.96998	0.96998	1	19647	0	0.75586	0.0012529	0.0064187	0.680397	181	5	0.75586
ANKRD40	6	0.18075	0.37167	1	6354	3	-0.20112	0.43656	0.67425	1	13267	1	-0.20112
ANKRD42	6	0.85377	0.88007	1	17066	1	0.021685	0.7882	0.89041	1	17343	2	0.021685
ANKRD44	6	0.27725	0.48391	1	8207	3	0.014105	0.36093	0.61363	1	12162	3	0.014105
ANKRD45	6	0.8477	0.87709	1	16979	1	0.64877	0.0054489	0.025592	0.761191	672	5	0.64877
ANKRD46	6	0.64514	0.77645	1	14374	2	0.11293	0.45286	0.68731	1	13546	3	0.11293
ANKRD49	6	0.13059	0.30549	1	5380	2	0.31291	0.029693	0.10578	0.858889	2487	4	0.31291
ANKRD50	6	0.99723	0.99727	1	20573	0	0.7007	0.0027734	0.01363	0.714521	377	6	0.7007
ANKRD52	6	0.023129	0.082056	0.69329	2393	3	-0.43861	0.66642	0.8334	1	16267	2	-0.43861
ANKRD53	6	0.86693	0.88688	1	17277	1	0.45275	0.08155	0.23879	0.910182	5305	4	0.45275
ANKRD54	6	0.025672	0.089906	0.727673	2494	3	-0.33552	0.0051302	0.024204	0.761191	627	3	-0.33552
ANKRD55	6	0.46085	0.65289	1	11573	1	0.15891	0.07695	0.22795	0.908717	5085	3	0.15891
ANKRD6	6	0.3806	0.59856	1	10430	3	0.012899	0.3784	0.62779	1	12437	3	0.012899
ANKRD61	6	0.68771	0.8078	1	15107	1	0.29309	0.065413	0.20015	0.902847	4512	5	0.29309
ANKRD62	6	0.85743	0.88196	1	17126	1	0.255	0.094809	0.2658	0.923953	5842	4	0.255
ANKRD65	6	0.69652	0.81446	1	15259	2	0.22266	0.19801	0.42585	0.989684	8775	4	0.22266
ANKRD66	6	0.51833	0.68946	1	12380	2	0.16278	0.12445	0.31431	0.950679	6733	3	0.16278
ANKRD7	6	0.32934	0.54249	1	9297	3	-0.14572	0.51049	0.73279	1	14352	3	-0.14572
ANKRD9	6	0.59055	0.73795	1	13480	1	0.33488	0.014932	0.061891	0.814594	1521	5	0.33488
ANKS1A	6	0.25367	0.45684	1	7724	3	0.028624	0.2761	0.53256	1	10734	3	0.028624
ANKS1B	6	0.10816	0.2635	1	4792	1	0.42414	0.063707	0.19595	0.902457	4418	4	0.42414
ANKS3	6	0.12343	0.29218	1	5205	4	-0.15668	0.85375	0.92643	1	18090	1	-0.15668
ANKS4B	6	0.13063	0.30556	1	5382	1	0.18754	0.24642	0.49303	1	9976	4	0.18754
ANKS6	6	0.35557	0.5713	1	9869	1	-0.0051574	0.32919	0.58783	1	11682	2	-0.0051574
ANKZF1	6	0.044898	0.13524	0.887006	3083	3	-0.39936	0.6787	0.8387	1	16367	2	-0.39936
ANLN	6	0.12677	0.2984	1	5285	3	-0.11156	0.40811	0.65171	1	12857	3	-0.11156
ANO1	6	0.65105	0.78075	1	14481	2	0.033743	0.030913	0.10927	0.862558	2578	3	0.033743
ANO10	6	0.92702	0.92776	1	18442	1	0.38189	0.14499	0.3468	0.960625	7365	4	0.38189
ANO3	6	0.37009	0.58712	1	10205	2	0.11617	0.45429	0.68843	1	13565	3	0.11617
ANO4	6	0.64655	0.77747	1	14397	2	0.34809	0.20029	0.4291	0.990662	8841	4	0.34809
ANO5	6	0.70321	0.81962	1	15381	2	0.36849	0.047679	0.15495	0.887379	3566	4	0.36849
ANO6	6	0.56287	0.71896	1	13034	1	0.36842	0.038299	0.12979	0.880623	2993	5	0.36842
ANO7	6	0.74007	0.83632	1	15778	1	0.56212	0.023165	0.086811	0.830034	2103	5	0.56212
ANO8	6	0.36089	0.57705	1	9982	1	0.20553	0.20705	0.43873	0.993006	9022	3	0.20553
ANO9	6	0.5442	0.70655	1	12766	1	-0.044259	0.23393	0.47605	1	9669	2	-0.044259
ANP32A	6	0.10096	0.24982	1	4588	4	-0.38348	0.62042	0.81425	1	15884	2	-0.38348
ANP32B	6	0.0027727	0.013411	0.223158	1226	4	-0.9841	0.81177	0.90275	1	17581	2	-0.9841
ANP32D	6	0.80366	0.85813	1	16448	1	0.18908	0.031639	0.11129	0.866078	2619	3	0.18908
ANP32E	6	0.24701	0.44904	1	7614	3	-0.24239	0.86158	0.93108	1	18195	2	-0.24239
ANPEP	6	0.63484	0.76906	1	14194	1	0.27761	0.11119	0.29288	0.939042	6345	4	0.27761
ANTXR1	6	0.35378	0.56934	1	9832	1	-0.043214	0.086814	0.251	0.913446	5565	1	-0.043214
ANTXR2	6	0.93153	0.93185	1	18562	1	0.78903	0.018401	0.072507	0.81958	1778	4	0.78903
ANXA1	6	0.089418	0.22716	1	4269	4	-0.31459	0.056421	0.17771	0.893243	4050	2	-0.31459
ANXA10	6	0.98055	0.98073	1	19977	0	0.69474	0.0022642	0.01125	0.710634	308	5	0.69474
ANXA11	6	0.00013681	0.00074784	0.034554	448	3	-0.88379	0.030042	0.10675	0.859742	2516	3	-0.88379
ANXA13	6	0.24552	0.44736	1	7584	2	-0.023545	0.81768	0.90595	1	17648	2	-0.023545
ANXA2	6	0.0048256	0.020984	0.305264	1403	4	-0.60303	0.53427	0.75132	1	14691	2	-0.60303
ANXA2R	6	0.963	0.96298	1	19449	0	0.36553	0.080429	0.23612	0.910182	5250	5	0.36553
ANXA3	6	0.58749	0.73581	1	13427	1	0.39247	0.031801	0.11174	0.867579	2624	5	0.39247
ANXA4	6	0.66979	0.79447	1	14793	1	0.58916	0.0059685	0.027888	0.761191	721	5	0.58916
ANXA5	6	0.4286	0.63295	1	11158	1	0.40875	0.17038	0.3855	0.975177	8053	4	0.40875
ANXA6	6	0.75772	0.84192	1	15945	1	0.52383	0.016949	0.068054	0.816005	1676	5	0.52383
ANXA7	6	0.11839	0.28282	1	5055	4	-0.21525	0.88207	0.93773	1	18359	1	-0.21525
ANXA8	6	0.71617	0.82934	1	15602	1	0.12419	0.10796	0.28755	0.937088	6247	4	0.12419
ANXA8L1	4	0.14032	0.28497	1	5636	2	-0.30685	0.26155	0.46752	1	10361	2	-0.30685
ANXA8L2	3	0.011252	0.029999	0.387177	1832	3	-0.66017	0.98875	0.98887	1	19869	0	-0.66017
ANXA9	6	0.98488	0.98503	1	20118	0	0.4439	0.0737	0.22019	0.907788	4926	5	0.4439
AOAH	6	0.61341	0.7539	1	13831	2	0.0029399	0.61276	0.81109	1	15818	2	0.0029399
AOC2	6	0.028536	0.09864	0.756848	2629	4	-0.60951	0.74582	0.86928	1	16910	1	-0.60951
AOC3	6	0.062745	0.17334	0.988488	3546	4	-0.2981	0.59272	0.79647	1	15561	1	-0.2981
AOX1	6	0.99511	0.99516	1	20493	0	0.4123	0.0048905	0.023167	0.761191	603	6	0.4123
AP1AR	4	0.27092	0.41865	1	8089	1	0.30403	0.24565	0.4459	0.99536	9957	3	0.30403
AP1B1	6	0.24834	0.45058	1	7633	1	0.36876	0.077115	0.22833	0.908717	5093	4	0.36876
AP1G1	6	0.6358	0.76971	1	14210	2	0.46148	0.082959	0.24213	0.910807	5386	4	0.46148
AP1G2	6	0.075111	0.19859	1	3889	2	0.16721	0.24677	0.49351	1	9993	3	0.16721
AP1M1	6	0.6852	0.80592	1	15061	1	0.54065	0.039706	0.13364	0.880623	3081	4	0.54065
AP1M2	6	0.16663	0.35479	1	6088	3	-0.28685	0.23597	0.47885	1	9717	2	-0.28685
AP1S1	6	0.52185	0.69172	1	12432	2	0.075327	0.49368	0.71945	1	14128	3	0.075327
AP1S2	6	0.69784	0.81553	1	15279	1	0.38656	0.020316	0.078323	0.828035	1901	4	0.38656
AP1S3	6	0.62457	0.76182	1	14033	2	0.39998	0.046214	0.15111	0.886571	3477	4	0.39998
AP2A1	6	0.0049256	0.021338	0.308233	1415	5	-0.71423	0.95536	0.96248	1	19070	1	-0.71423
AP2A2	6	0.49522	0.67457	1	12035	2	-0.0066399	0.48702	0.71423	1	14032	2	-0.0066399
AP2B1	6	0.0313	0.10493	0.777699	2729	3	-0.22779	0.77626	0.88432	1	17215	2	-0.22779
AP2M1	6	0.0038517	0.01742	0.267103	1335	5	-0.78098	0.78271	0.88757	1	17292	1	-0.78098
AP2S1	6	2.2e-06	1.46e-05	0.003775	80	6	-1.9174	0.99978	0.99977	1	20522	0	-1.9174
AP3B1	6	0.99701	0.99708	1	20563	0	1.0017	0.0029869	0.014611	0.724107	400	6	1.0017
AP3B2	6	0.28523	0.49292	1	8355	3	-0.14816	0.65583	0.82885	1	16182	2	-0.14816
AP3D1	6	0.51272	0.68581	1	12288	2	0.064429	0.44251	0.67906	1	13373	3	0.064429
AP3M1	6	0.61651	0.75611	1	13885	1	0.0056313	0.77771	0.88502	1	17243	2	0.0056313
AP3M2	6	0.05839	0.16425	0.96961	3417	4	-0.32311	0.20885	0.44122	0.993825	9063	2	-0.32311
AP3S1	6	0.36635	0.58305	1	10113	1	0.38406	0.24661	0.49328	1	9985	4	0.38406
AP3S2	6	0.95013	0.95017	1	19092	0	0.28508	0.14187	0.34191	0.957363	7285	4	0.28508
AP4B1	6	0.9631	0.96307	1	19451	0	0.3526	0.094036	0.26445	0.923189	5816	4	0.3526
AP4E1	6	0.29366	0.50246	1	8543	2	0.45879	0.066273	0.20224	0.903397	4562	4	0.45879
AP4M1	6	0.93475	0.93492	1	18648	1	0.52123	0.035433	0.12183	0.87693	2826	4	0.52123
AP4S1	6	0.62261	0.76043	1	13996	2	0.17666	0.29873	0.56169	1	11222	4	0.17666
AP5B1	6	0.13473	0.31308	1	5490	4	-0.27681	0.94786	0.95881	1	18981	1	-0.27681
AP5M1	6	0.24072	0.44181	1	7479	1	0.32613	0.025586	0.093895	0.839214	2255	5	0.32613
AP5S1	6	0.79246	0.85395	1	16314	1	0.32902	0.065338	0.19998	0.902688	4508	5	0.32902
AP5Z1	6	0.92584	0.92675	1	18402	1	0.029689	0.34606	0.60154	1	11918	2	0.029689
APAF1	6	0.10549	0.25851	1	4712	3	-0.60151	0.57674	0.78406	1	15325	1	-0.60151
APBA1	6	0.82302	0.86601	1	16682	1	0.45165	0.013354	0.056931	0.805138	1409	5	0.45165
APBA2	6	0.84102	0.87394	1	16892	1	0.16828	0.50431	0.72787	1	14262	3	0.16828
APBA3	6	0.1263	0.29754	1	5275	2	0.38779	0.011789	0.051988	0.791566	1311	3	0.38779
APBB1	6	0.85472	0.88055	1	17084	1	0.66157	0.05986	0.18636	0.896602	4230	5	0.66157
APBB1IP	6	0.027301	0.094854	0.74243	2581	5	-0.20293	0.99114	0.99121	1	19959	0	-0.20293
APBB2	6	0.30049	0.51016	1	8682	2	0.30605	0.17114	0.38663	0.975177	8080	4	0.30605
APBB3	6	0.9532	0.95326	1	19174	0	0.42186	0.061582	0.19067	0.897646	4319	5	0.42186
APC	6	0.51795	0.68923	1	12376	2	-0.045201	0.56714	0.77664	1	15180	2	-0.045201
APC2	6	0.25768	0.46154	1	7798	3	-0.24209	0.98443	0.98458	1	19730	0	-0.24209
APCDD1	6	0.60173	0.74568	1	13661	2	-0.07488	0.55336	0.76601	1	14990	1	-0.07488
APCDD1L	6	0.58303	0.73271	1	13355	2	0.073221	0.38877	0.63626	1	12586	3	0.073221
APCS	6	0.85626	0.88135	1	17106	1	0.42668	0.20441	0.43502	0.993006	8942	4	0.42668
APEH	6	0.75384	0.84067	1	15918	1	0.54137	0.054092	0.17172	0.892097	3926	5	0.54137
APEX1	6	0.081416	0.21121	1	4062	4	-0.25073	0.80252	0.89778	1	17488	1	-0.25073
APEX2	6	0.13291	0.30973	1	5443	3	-0.13494	0.71266	0.85391	1	16640	2	-0.13494
APH1A	6	0.084619	0.21764	1	4149	3	-0.11619	0.29346	0.55499	1	11113	3	-0.11619
APH1B	6	0.92323	0.92446	1	18346	1	0.42456	0.049722	0.16032	0.888815	3679	5	0.42456
API5	6	0.88321	0.89607	1	17549	1	0.0637	0.78014	0.88627	1	17261	1	0.0637
APIP	6	0.51449	0.68696	1	12328	1	0.15153	0.44243	0.67899	1	13371	3	0.15153
APITD1	6	0.3205	0.53267	1	9088	2	0.10928	0.17413	0.39106	0.975177	8174	3	0.10928
APITD1-CORT	2	0.24016	0.29791	1	7464	1	-0.381	0.5987	0.6108	1	15638	1	-0.381
APLF	6	0.56174	0.71817	1	13022	2	0.085818	0.41726	0.65895	1	12973	2	0.085818
APLN	6	0.99399	0.99404	1	20456	0	0.53046	0.0060139	0.028088	0.761191	726	6	0.53046
APLNR	6	0.31769	0.52952	1	9026	2	-0.071697	0.9002	0.9423	1	18464	1	-0.071697
APLP1	6	0.13891	0.32069	1	5606	4	-0.28806	0.97482	0.97532	1	19447	1	-0.28806
APLP2	6	0.86625	0.88651	1	17260	1	0.15734	0.46074	0.69351	1	13659	3	0.15734
APMAP	6	0.9936	0.99368	1	20444	0	0.47281	0.0064023	0.029785	0.761191	775	6	0.47281
APOA1	6	0.61154	0.75257	1	13799	2	0.47698	0.04376	0.14463	0.880623	3348	4	0.47698
APOA1BP	6	0.61614	0.75588	1	13875	2	0.24119	0.41455	0.65678	1	12939	3	0.24119
APOA2	6	0.89937	0.90642	1	17840	1	0.46323	0.075329	0.22412	0.90855	5006	4	0.46323
APOA4	6	0.71116	0.8257	1	15523	1	0.40361	0.02985	0.10622	0.858889	2503	5	0.40361
APOA5	6	0.19573	0.38945	1	6631	2	0.063323	0.48613	0.71353	1	14023	2	0.063323
APOB	6	0.75738	0.84182	1	15944	1	0.48521	0.052017	0.16639	0.891444	3806	4	0.48521
APOBEC1	6	0.35204	0.56744	1	9797	2	0.095102	0.54445	0.75916	1	14833	3	0.095102
APOBEC2	6	0.0049608	0.021463	0.309222	1420	5	-0.60552	0.99643	0.99648	1	20208	0	-0.60552
APOBEC3A	6	0.50384	0.68006	1	12169	2	0.29341	0.10651	0.28517	0.936682	6197	4	0.29341
APOBEC3A_B	2	0.76199	0.76162	1	15998	0	0.23701	0.54026	0.56425	1	14774	1	0.23701
APOBEC3B	6	0.077257	0.20293	1	3947	4	-0.38769	0.74311	0.86796	1	16893	2	-0.38769
APOBEC3C	6	0.49853	0.67669	1	12086	1	0.093879	0.54829	0.76208	1	14914	3	0.093879
APOBEC3D	6	0.73341	0.83429	1	15717	1	0.25124	0.060861	0.18889	0.897633	4282	3	0.25124
APOBEC3F	6	0.55508	0.71377	1	12923	2	0.069613	0.12258	0.3113	0.948664	6680	2	0.069613
APOBEC3G	6	0.70601	0.82176	1	15425	2	0.19802	0.26008	0.51153	1	10321	3	0.19802
APOBEC3H	6	0.76487	0.84426	1	16030	1	-0.043683	0.54817	0.76199	1	14911	2	-0.043683
APOBEC4	6	0.9713	0.97134	1	19685	0	0.32805	0.15013	0.35469	0.964388	7506	4	0.32805
APOBR	6	0.86917	0.88805	1	17323	1	0.12936	0.55192	0.7649	1	14969	3	0.12936
APOC1	6	0.020147	0.072671	0.650645	2269	5	-0.41985	0.98721	0.98729	1	19819	0	-0.41985
APOC2	6	0.59849	0.74344	1	13614	1	0.53428	0.022057	0.08351	0.830034	2018	5	0.53428
APOC3	6	0.61773	0.75698	1	13908	2	0.15308	0.28831	0.54834	1	11012	3	0.15308
APOC4	6	0.73464	0.83465	1	15730	1	0.30648	0.18703	0.40997	0.981572	8519	3	0.30648
APOD	6	0.74279	0.83714	1	15803	1	0.10609	0.6493	0.82615	1	16117	2	0.10609
APOE	6	0.60225	0.74605	1	13668	2	0.3593	0.03352	0.11656	0.870167	2723	3	0.3593
APOF	6	0.6682	0.7933	1	14758	1	0.51465	0.046888	0.15289	0.886571	3514	4	0.51465
APOH	6	0.94078	0.9409	1	18808	0	0.35834	0.10524	0.28314	0.935814	6161	4	0.35834
APOL1	6	0.32765	0.54062	1	9253	2	0.33297	0.1052	0.28307	0.935772	6159	3	0.33297
APOL2	6	0.95777	0.95773	1	19294	0	0.43217	0.017372	0.069355	0.816005	1702	5	0.43217
APOL3	6	0.99658	0.99663	1	20542	0	0.49594	0.0034186	0.016595	0.741576	448	6	0.49594
APOL4	6	0.98982	0.98991	1	20311	0	0.7985	0.0020931	0.010431	0.708473	290	6	0.7985
APOL5	6	0.41635	0.6255	1	10974	2	0.38273	0.12233	0.31092	0.94853	6671	4	0.38273
APOL6	6	0.74953	0.83926	1	15874	1	0.14761	0.31566	0.57668	1	11477	3	0.14761
APOLD1	6	0.19247	0.3856	1	6580	3	-0.29184	0.99293	0.99302	1	20033	0	-0.29184
APOM	6	0.10136	0.25055	1	4596	3	-0.034075	0.83329	0.91466	1	17851	2	-0.034075
APOO	6	0.64439	0.77592	1	14358	1	0.56895	0.017498	0.069756	0.816005	1714	4	0.56895
APOOL	6	0.70231	0.81892	1	15367	2	0.22437	0.19413	0.42024	0.987237	8680	4	0.22437
APOPT1	6	0.45494	0.64922	1	11509	2	-0.11219	0.83839	0.91756	1	17913	1	-0.11219
APP	6	0.94837	0.94844	1	19030	0	0.39733	0.051114	0.16401	0.890245	3754	5	0.39733
APPBP2	6	0.57744	0.72891	1	13265	1	0.7372	0.015435	0.063441	0.814594	1559	4	0.7372
APPL1	6	0.9136	0.91669	1	18124	1	0.031612	0.33438	0.59203	1	11757	2	0.031612
APPL2	6	0.87843	0.89323	1	17470	1	0.30339	0.15735	0.36583	0.969866	7697	4	0.30339
APRT	6	0.72957	0.83312	1	15692	1	0.13817	0.090493	0.25846	0.919235	5703	3	0.13817
APTX	6	0.030333	0.10273	0.770711	2693	4	-0.55671	0.47083	0.70146	1	13803	2	-0.55671
AQP1	6	0.34627	0.56106	1	9675	3	-0.048335	0.03362	0.11686	0.870167	2735	2	-0.048335
AQP10	6	0.95446	0.95451	1	19217	0	0.53954	0.020782	0.07971	0.828311	1935	4	0.53954
AQP11	6	0.30038	0.51003	1	8680	3	-0.034004	0.29247	0.55375	1	11091	3	-0.034004
AQP12B	6	0.58507	0.73413	1	13383	1	0.92227	0.0033922	0.016466	0.741573	445	4	0.92227
AQP2	6	0.34272	0.5572	1	9599	2	0.24759	0.16027	0.37029	0.971108	7787	4	0.24759
AQP3	6	0.89836	0.90573	1	17822	1	0.50575	0.089471	0.2567	0.917732	5671	4	0.50575
AQP4	6	0.81338	0.862	1	16548	1	0.10817	0.28539	0.54461	1	10934	3	0.10817
AQP5	6	0.60648	0.749	1	13732	1	0.59837	0.06015	0.18707	0.896848	4248	4	0.59837
AQP6	6	0.19737	0.3914	1	6669	2	0.36337	0.10788	0.28743	0.937045	6245	4	0.36337
AQP7	6	0.053363	0.15353	0.943517	3296	4	-0.3745	0.77994	0.88617	1	17260	2	-0.3745
AQP8	6	0.78231	0.85026	1	16224	1	0.33923	0.081305	0.23822	0.910182	5292	4	0.33923
AQP9	6	0.49362	0.67354	1	12014	2	0.21185	0.38638	0.63433	1	12550	3	0.21185
AQPEP	6	0.10188	0.25155	1	4609	4	-0.31549	0.00050948	0.002685	0.600356	86	2	-0.31549
AQR	4	0.19767	0.34579	1	6674	2	-0.31183	0.7994	0.84123	1	17464	1	-0.31183
AR	6	0.67606	0.79912	1	14902	2	0.11778	0.39409	0.64056	1	12669	3	0.11778
ARAF	6	0.93443	0.93462	1	18641	1	0.25885	0.072401	0.21709	0.907459	4861	5	0.25885
ARAP1	6	0.96145	0.96142	1	19406	0	0.52873	0.023728	0.088495	0.830034	2140	5	0.52873
ARAP2	6	0.26668	0.47185	1	7992	2	0.27575	0.1494	0.35358	0.964319	7485	4	0.27575
ARAP3	6	0.39764	0.61427	1	10728	2	0.045283	0.44917	0.68436	1	13485	3	0.045283
ARC	6	0.93201	0.9323	1	18576	1	0.49403	0.00048694	0.0025601	0.592684	83	4	0.49403
ARCN1	6	0.00071262	0.0037363	0.099499	767	5	-1.4231	0.98667	0.98674	1	19802	0	-1.4231
AREG	6	0.71701	0.82958	1	15606	1	0.061311	0.32962	0.58818	1	11685	2	0.061311
AREL1	6	0.15588	0.34176	1	5903	3	-0.045263	0.54258	0.7577	1	14811	3	-0.045263
ARF1	6	7.24e-05	0.00038289	0.023204	341	5	-3.0001	0.99637	0.99642	1	20204	0	-3.0001
ARF3	6	0.13306	0.30999	1	5447	2	0.19175	0.073302	0.21925	0.907622	4903	3	0.19175
ARF4	6	1.8e-05	0.00010738	0.011103	198	5	-1.4793	0.87741	0.93661	1	18329	1	-1.4793
ARF5	6	0.045717	0.13704	0.891737	3106	2	0.054497	0.20676	0.43832	0.993006	9008	2	0.054497
ARF6	6	0.99689	0.99695	1	20555	0	0.94014	0.00063628	0.0033403	0.610257	104	6	0.94014
ARFGAP1	6	0.12372	0.29276	1	5214	4	-0.23015	0.81048	0.90207	1	17572	2	-0.23015
ARFGAP2	6	0.36194	0.57827	1	10010	2	0.57336	0.031882	0.11198	0.867579	2628	4	0.57336
ARFGAP3	6	0.28283	0.4902	1	8314	2	0.15547	0.16723	0.38077	0.97427	7986	3	0.15547
ARFGEF1	6	0.31214	0.52331	1	8923	3	-0.096829	0.35125	0.60583	1	11997	2	-0.096829
ARFGEF2	6	0.46312	0.65431	1	11610	2	-0.019646	0.85481	0.92705	1	18104	2	-0.019646
ARFIP1	6	0.53677	0.70158	1	12658	2	0.039874	0.72473	0.85941	1	16733	2	0.039874
ARFIP2	6	0.25502	0.45846	1	7749	2	0.047626	0.46442	0.69644	1	13719	2	0.047626
ARFRP1	6	0.00038394	0.0020484	0.068279	617	5	-0.96268	0.96697	0.96932	1	19270	1	-0.96268
ARG1	6	0.97999	0.98015	1	19959	0	0.50843	0.02317	0.086834	0.830034	2104	5	0.50843
ARG2	6	0.96506	0.96503	1	19498	0	0.39063	0.048622	0.15742	0.888136	3622	5	0.39063
ARGFX	6	0.22833	0.42757	1	7235	2	0.27989	0.082273	0.24053	0.910182	5350	4	0.27989
ARGLU1	6	0.068341	0.18482	1	3698	3	-0.10847	0.72161	0.858	1	16712	2	-0.10847
ARHGAP1	6	0.36601	0.58267	1	10108	2	0.45275	0.021016	0.080402	0.829337	1949	4	0.45275
ARHGAP10	4	0.20238	0.35051	1	6773	2	-0.3	0.87041	0.8809	1	18277	1	-0.3
ARHGAP11A	6	0.38836	0.60699	1	10581	3	-0.05848	0.38031	0.62935	1	12463	2	-0.05848
ARHGAP11B	5	0.14709	0.30131	1	5760	3	-0.37842	0.52477	0.72013	1	14552	2	-0.37842
ARHGAP12	6	0.62684	0.76337	1	14066	2	0.20896	0.26361	0.5162	1	10415	3	0.20896
ARHGAP15	6	0.042756	0.13057	0.870199	3031	2	0.096201	0.41394	0.65629	1	12932	3	0.096201
ARHGAP17	6	0.94638	0.94643	1	18968	0	0.070617	0.17361	0.39028	0.975177	8155	3	0.070617
ARHGAP18	6	0.85474	0.88056	1	17085	1	0.018194	0.46695	0.69842	1	13757	2	0.018194
ARHGAP19	6	0.26768	0.47302	1	8014	3	-0.13776	0.55311	0.76581	1	14985	2	-0.13776
ARHGAP20	6	0.24613	0.44805	1	7600	3	-0.03325	0.33854	0.59543	1	11814	3	-0.03325
ARHGAP21	6	0.17406	0.36371	1	6225	3	-0.4013	0.88997	0.93964	1	18406	1	-0.4013
ARHGAP22	6	0.77777	0.8487	1	16182	1	0.3279	0.21429	0.44889	0.996964	9208	4	0.3279
ARHGAP23	6	0.93532	0.93546	1	18659	1	0.63529	0.0063675	0.029638	0.761191	768	5	0.63529
ARHGAP24	6	0.96866	0.96865	1	19609	0	0.26941	0.15077	0.35573	0.965253	7521	3	0.26941
ARHGAP25	6	0.17314	0.36262	1	6206	2	0.052969	0.64109	0.82268	1	16055	2	0.052969
ARHGAP26	6	0.99578	0.99584	1	20520	0	0.64563	0.0042164	0.020175	0.761191	521	6	0.64563
ARHGAP27	6	0.99945	0.99945	1	20670	0	0.78375	0.00054934	0.0028864	0.600356	93	6	0.78375
ARHGAP28	6	0.70934	0.82432	1	15491	2	-0.10115	0.96464	0.9678	1	19223	1	-0.10115
ARHGAP29	6	0.15367	0.33911	1	5868	3	-0.037278	0.061907	0.1915	0.897646	4343	3	-0.037278
ARHGAP30	6	0.13173	0.30756	1	5403	4	-0.34467	0.86082	0.93062	1	18187	1	-0.34467
ARHGAP31	6	0.14999	0.33454	1	5803	3	-0.16101	0.80983	0.90171	1	17567	2	-0.16101
ARHGAP32	6	0.053567	0.15397	0.943714	3303	4	-0.43437	0.031094	0.10975	0.862558	2587	2	-0.43437
ARHGAP33	6	0.61809	0.75724	1	13919	1	0.16596	0.19938	0.42779	0.990064	8815	3	0.16596
ARHGAP35	6	0.38687	0.60541	1	10547	3	-0.082163	0.66348	0.83211	1	16241	2	-0.082163
ARHGAP36	6	0.50704	0.68215	1	12212	2	0.016003	0.047827	0.15537	0.887526	3573	3	0.016003
ARHGAP39	6	0.20283	0.39791	1	6780	3	-0.12555	0.90834	0.94458	1	18534	1	-0.12555
ARHGAP4	6	0.57629	0.72813	1	13249	2	0.39855	0.045446	0.1491	0.885122	3442	4	0.39855
ARHGAP40	6	0.6803	0.80226	1	14964	2	0.065948	0.12633	0.31732	0.952839	6781	2	0.065948
ARHGAP44	6	0.7003	0.81743	1	15323	1	0.13417	0.24591	0.49235	1	9965	3	0.13417
ARHGAP5	6	0.30381	0.51388	1	8738	1	0.70235	0.005017	0.023716	0.761191	614	5	0.70235
ARHGAP6	6	0.83511	0.8713	1	16825	1	0.56381	0.14455	0.34612	0.960545	7352	4	0.56381
ARHGAP8	6	0.83118	0.86949	1	16785	1	0.61206	0.02901	0.10382	0.858889	2442	4	0.61206
ARHGAP9	6	0.51338	0.68621	1	12297	2	0.17815	0.23027	0.47114	1	9591	4	0.17815
ARHGDIA	6	0.049458	0.14508	0.917758	3196	3	-0.24436	0.47308	0.70321	1	13825	2	-0.24436
ARHGDIB	6	0.87935	0.89376	1	17488	1	0.45511	0.039711	0.13365	0.880623	3082	4	0.45511
ARHGDIG	6	0.096359	0.2409	1	4450	4	-0.42996	0.18112	0.40132	0.977578	8366	2	-0.42996
ARHGEF1	6	0.053957	0.1548	0.944929	3312	3	-0.057043	0.43671	0.67435	1	13271	3	-0.057043
ARHGEF10	6	0.059486	0.16652	0.974267	3446	4	-0.46154	0.1128	0.29551	0.94049	6399	1	-0.46154
ARHGEF10L	6	0.67992	0.80197	1	14958	2	0.1647	0.055616	0.17567	0.893243	3995	3	0.1647
ARHGEF11	6	0.64788	0.77844	1	14424	1	0.37804	0.081741	0.23925	0.910182	5314	5	0.37804
ARHGEF12	6	0.64445	0.77596	1	14359	1	0.28952	0.21747	0.45335	0.998517	9287	4	0.28952
ARHGEF15	6	0.23278	0.43265	1	7327	1	0.34114	0.17356	0.3902	0.975177	8153	4	0.34114
ARHGEF16	6	0.093373	0.23494	1	4374	2	-0.045002	0.73596	0.8646	1	16834	2	-0.045002
ARHGEF17	6	0.12908	0.30269	1	5350	1	0.1341	0.37381	0.62403	1	12372	3	0.1341
ARHGEF18	6	0.5375	0.70208	1	12672	2	0.058116	0.47203	0.70239	1	13817	2	0.058116
ARHGEF19	6	0.081779	0.21195	1	4073	3	-0.1697	0.227	0.46668	1	9524	3	-0.1697
ARHGEF2	6	0.77602	0.84809	1	16157	1	0.64673	0.0060677	0.028318	0.761191	735	5	0.64673
ARHGEF25	6	0.25362	0.45679	1	7722	2	0.039605	0.91141	0.94547	1	18567	1	0.039605
ARHGEF26	6	0.69963	0.8169	1	15312	2	0.21009	0.2992	0.56232	1	11230	3	0.21009
ARHGEF28	6	0.96735	0.96735	1	19573	0	0.10323	0.17894	0.39812	0.976321	8311	3	0.10323
ARHGEF3	6	0.94495	0.94504	1	18932	0	0.42213	0.10207	0.2779	0.934027	6060	4	0.42213
ARHGEF33	6	0.65157	0.78112	1	14490	2	0.18746	0.086842	0.25106	0.913446	5567	3	0.18746
ARHGEF35	6	0.054319	0.15557	0.947484	3320	4	-0.46928	0.96429	0.96757	1	19217	1	-0.46928
ARHGEF37	6	0.96536	0.96533	1	19504	0	0.43853	0.015692	0.064232	0.814685	1580	4	0.43853
ARHGEF38	6	0.6889	0.80871	1	15128	1	0.27345	0.090859	0.25909	0.919771	5717	3	0.27345
ARHGEF39	6	0.49642	0.67532	1	12051	2	0.34587	0.12894	0.32151	0.954023	6853	4	0.34587
ARHGEF4	6	0.25295	0.45602	1	7712	3	0.07111	0.29074	0.55152	1	11064	3	0.07111
ARHGEF40	6	0.38982	0.60858	1	10603	3	-0.036219	0.84914	0.92371	1	18027	2	-0.036219
ARHGEF5	6	0.0038436	0.017394	0.266905	1333	4	-0.5522	0.37208	0.62263	1	12331	2	-0.5522
ARHGEF6	6	0.6987	0.81617	1	15294	1	0.35722	0.018736	0.073537	0.822678	1797	3	0.35722
ARHGEF7	6	0.38807	0.6067	1	10573	2	0.051325	0.9775	0.9777	1	19514	1	0.051325
ARHGEF9	6	0.98754	0.98763	1	20229	0	0.83634	0.0042832	0.020495	0.761191	528	5	0.83634
ARID1A	6	0.17454	0.36428	1	6236	2	0.12886	0.37328	0.62358	1	12361	3	0.12886
ARID1B	6	0.29403	0.50289	1	8551	2	0.21928	0.18815	0.41156	0.982948	8541	4	0.21928
ARID2	6	0.13232	0.30865	1	5427	3	-0.24716	0.37299	0.62336	1	12355	3	-0.24716
ARID3A	6	0.00074266	0.0038975	0.102514	777	5	-1.3071	0.97245	0.97332	1	19386	1	-1.3071
ARID3B	6	0.45296	0.64802	1	11478	2	0.27055	0.07399	0.22089	0.908121	4941	3	0.27055
ARID3C	6	0.27147	0.47735	1	8097	3	-0.14001	0.36934	0.62046	1	12283	2	-0.14001
ARID4A	6	0.92765	0.92833	1	18460	1	0.65466	0.0038139	0.018374	0.753718	487	5	0.65466
ARID4B	6	0.12301	0.29144	1	5194	4	-0.20601	0.47584	0.70544	1	13860	2	-0.20601
ARID5A	6	0.3796	0.59747	1	10411	3	-0.029027	0.37287	0.62327	1	12354	2	-0.029027
ARID5B	6	0.45883	0.65161	1	11546	2	0.10883	0.40456	0.64889	1	12805	3	0.10883
ARIH1	6	0.089036	0.22641	1	4262	4	-0.46198	0.7423	0.86757	1	16886	1	-0.46198
ARIH2	6	0.10828	0.26372	1	4795	3	-0.18762	0.030139	0.10702	0.860004	2526	2	-0.18762
ARIH2OS	6	0.42522	0.63092	1	11102	2	-0.10579	0.91397	0.94622	1	18588	1	-0.10579
ARL1	6	0.94189	0.94202	1	18847	0	0.2134	0.25203	0.50064	1	10109	3	0.2134
ARL10	6	0.19043	0.38317	1	6542	3	-0.16627	0.65088	0.82682	1	16140	2	-0.16627
ARL11	6	0.54479	0.70694	1	12778	2	0.0067171	0.82591	0.91049	1	17745	2	0.0067171
ARL13A	6	0.819	0.86433	1	16627	1	0.48794	0.032946	0.11496	0.867851	2697	4	0.48794
ARL13B	6	0.35381	0.56936	1	9833	2	0.097583	0.080719	0.23681	0.910182	5261	3	0.097583
ARL14	6	0.88139	0.89496	1	17523	1	0.30821	0.037043	0.12633	0.879759	2916	4	0.30821
ARL14EP	6	0.10413	0.25589	1	4675	3	-0.20119	0.59185	0.7958	1	15546	2	-0.20119
ARL14EPL	6	0.92271	0.92403	1	18330	1	0.6171	0.01908	0.074599	0.825026	1819	5	0.6171
ARL15	6	0.99998	0.99999	1	20695	0	0.97843	1.54e-05	9.59e-05	0.120198	16	6	0.97843
ARL16	6	0.64468	0.77612	1	14365	2	0.52225	0.051573	0.16522	0.890245	3781	4	0.52225
ARL17A	6	0.40474	0.61852	1	10807	1	0.43359	0.1488	0.35267	0.963792	7462	4	0.43359
ARL17B	2	0.055008	0.097442	0.752629	3336	2	-2.4219	0.94499	0.94505	1	18931	0	-2.4219
ARL2	6	8.12e-09	2.39e-07	0.000248	5	6	-1.8123	1	1	1	20696	0	-1.8123
ARL2BP	6	0.50204	0.67892	1	12141	2	0.15117	0.082061	0.24002	0.910182	5335	3	0.15117
ARL3	6	0.45663	0.65028	1	11524	2	0.25668	0.21571	0.4509	0.998472	9243	4	0.25668
ARL4A	6	0.56774	0.72231	1	13126	2	-0.0015992	0.78799	0.89031	1	17340	2	-0.0015992
ARL4C	6	0.80931	0.86035	1	16512	1	0.44148	0.14931	0.35344	0.964071	7484	4	0.44148
ARL4D	6	0.59599	0.74175	1	13566	2	0.038269	0.62525	0.81623	1	15913	2	0.038269
ARL5A	6	0.30088	0.51057	1	8686	3	0.037957	0.034923	0.12044	0.87693	2794	3	0.037957
ARL5B	6	0.92111	0.92269	1	18299	1	0.42086	0.074429	0.22194	0.908265	4964	5	0.42086
ARL5C	6	0.6263	0.763	1	14061	2	0.20976	0.31562	0.57665	1	11476	3	0.20976
ARL6	6	0.25692	0.46067	1	7780	1	0.7226	0.001538	0.0077754	0.680397	222	5	0.7226
ARL6IP1	6	0.12022	0.28624	1	5113	3	-0.0058281	0.0068107	0.031575	0.761191	821	3	-0.0058281
ARL6IP5	6	0.12104	0.28774	1	5141	2	0.2543	0.036224	0.12407	0.878335	2870	3	0.2543
ARL6IP6	6	0.7662	0.84471	1	16047	1	0.19576	0.20617	0.43748	0.993006	8990	3	0.19576
ARL8A	6	0.34547	0.56023	1	9655	2	0.21676	0.19146	0.41638	0.985936	8612	3	0.21676
ARL8B	6	0.20532	0.40077	1	6831	3	-0.079923	0.44734	0.68287	1	13460	3	-0.079923
ARL9	6	0.14049	0.3229	1	5640	2	0.11154	0.424	0.66432	1	13073	3	0.11154
ARMC1	6	0.093856	0.23591	1	4388	3	-0.20154	0.49061	0.71704	1	14076	3	-0.20154
ARMC10	6	0.96119	0.96116	1	19398	0	0.073826	0.5959	0.79891	1	15606	3	0.073826
ARMC12	6	0.1035	0.25467	1	4654	3	-0.18652	0.19714	0.42458	0.988904	8754	3	-0.18652
ARMC2	6	0.33523	0.54897	1	9422	3	0.06497	0.28288	0.54134	1	10888	3	0.06497
ARMC3	6	0.26989	0.47558	1	8059	2	0.25196	0.40773	0.6514	1	12852	3	0.25196
ARMC4	6	0.66298	0.78937	1	14674	1	0.17495	0.0095445	0.043041	0.777096	1099	4	0.17495
ARMC5	6	0.0023882	0.011801	0.204249	1172	4	-0.74047	0.86331	0.93211	1	18212	2	-0.74047
ARMC6	6	0.28448	0.49206	1	8340	3	-0.14174	0.86413	0.93263	1	18223	2	-0.14174
ARMC7	6	0.0080702	0.032627	0.405694	1643	5	-0.83185	0.49014	0.71666	1	14069	1	-0.83185
ARMC8	6	0.24961	0.45204	1	7655	3	-0.18137	0.49209	0.71817	1	14107	2	-0.18137
ARMC9	6	0.78186	0.85013	1	16216	1	0.19102	0.23378	0.47585	1	9667	4	0.19102
ARMCX1	6	0.44596	0.64367	1	11378	2	0.45696	0.074071	0.2211	0.908181	4945	4	0.45696
ARMCX2	6	0.97254	0.97259	1	19721	0	0.40894	0.040018	0.13451	0.880623	3096	5	0.40894
ARMCX3	6	0.37863	0.59643	1	10384	3	-0.035705	0.59846	0.80084	1	15636	2	-0.035705
ARMCX4	6	0.030896	0.10405	0.774917	2710	2	-0.03995	0.5626	0.77312	1	15122	2	-0.03995
ARMCX5	6	0.24548	0.44732	1	7582	2	0.28203	0.14634	0.34886	0.962568	7395	4	0.28203
ARMCX5-GPRASP2	6	0.21316	0.40988	1	6955	3	-0.063007	0.41236	0.65507	1	12911	3	-0.063007
ARMCX6	6	0.64694	0.77774	1	14407	1	0.22494	0.28684	0.54646	1	10971	4	0.22494
ARMS2	6	0.074829	0.19802	1	3882	2	0.39969	0.11563	0.30007	0.942197	6485	4	0.39969
ARNT	6	0.19601	0.38979	1	6637	3	0.038573	0.14697	0.34985	0.962568	7414	3	0.038573
ARNT2	6	0.22892	0.42823	1	7247	3	0.23779	0.049896	0.16076	0.888815	3690	3	0.23779
ARNTL	6	0.98253	0.9827	1	20049	0	0.46651	0.0194	0.075576	0.825989	1840	5	0.46651
ARNTL2	6	0.38397	0.60224	1	10499	2	0.28533	0.15018	0.35478	0.964388	7508	3	0.28533
ARPC1A	6	0.34256	0.55702	1	9597	3	-0.044918	0.11041	0.2916	0.939033	6324	2	-0.044918
ARPC1B	6	0.94834	0.94842	1	19026	0	0.25228	0.0043386	0.020738	0.761191	538	4	0.25228
ARPC2	6	0.082374	0.21317	1	4090	4	-0.36963	0.40962	0.65291	1	12879	2	-0.36963
ARPC3	6	0.0096058	0.037954	0.447402	1734	5	-0.654	0.79596	0.89436	1	17431	1	-0.654
ARPC4	6	0.00030047	0.0016203	0.058636	571	5	-0.77598	0.96145	0.96584	1	19168	1	-0.77598
ARPC4-TTLL3	3	0.023755	0.060701	0.590743	2419	3	-0.32454	0.97625	0.97633	1	19484	0	-0.32454
ARPC5	6	0.83882	0.87295	1	16869	1	0.040009	0.28591	0.54525	1	10948	2	0.040009
ARPC5L	6	0.38753	0.60612	1	10564	3	-0.089507	0.93467	0.95321	1	18801	1	-0.089507
ARPP19	6	0.29133	0.49984	1	8488	1	0.26608	0.14959	0.35389	0.964388	7490	4	0.26608
ARPP21	6	0.36646	0.58317	1	10118	2	0.23041	0.10209	0.27793	0.934027	6061	3	0.23041
ARR3	6	0.91718	0.91947	1	18214	1	0.41129	0.078076	0.23058	0.909353	5133	4	0.41129
ARRB1	6	0.82111	0.86521	1	16657	1	0.17679	0.51822	0.73887	1	14453	3	0.17679
ARRB2	6	0.19441	0.38787	1	6609	3	-0.066782	0.50818	0.73098	1	14316	1	-0.066782
ARRDC1	6	0.13335	0.31053	1	5455	4	-0.35925	0.96673	0.96917	1	19266	1	-0.35925
ARRDC2	6	0.75162	0.83995	1	15893	1	0.32565	0.015372	0.063241	0.814594	1554	5	0.32565
ARRDC3	6	0.28487	0.49248	1	8348	2	0.23431	0.2039	0.43427	0.992811	8931	4	0.23431
ARRDC4	6	0.18774	0.37999	1	6484	3	-0.14129	0.79366	0.89316	1	17410	2	-0.14129
ARRDC5	6	0.29177	0.50034	1	8497	3	-0.22612	0.10236	0.27838	0.93438	6069	1	-0.22612
ARSA	6	0.067954	0.18404	1	3684	4	-0.32335	0.83223	0.91406	1	17831	1	-0.32335
ARSB	6	0.77064	0.84628	1	16098	1	0.3261	0.08675	0.25085	0.913446	5560	4	0.3261
ARSD	6	0.080795	0.20994	1	4042	4	-0.28691	0.95628	0.96294	1	19086	1	-0.28691
ARSE	6	0.96864	0.96862	1	19608	0	0.38474	0.1288	0.32127	0.954023	6849	4	0.38474
ARSF	6	0.85697	0.8817	1	17116	1	0.19646	0.39069	0.6378	1	12614	3	0.19646
ARSG	6	0.66307	0.78943	1	14678	2	-0.043053	0.48525	0.71283	1	14005	2	-0.043053
ARSH	6	0.65628	0.78445	1	14572	1	0.16636	0.071554	0.21502	0.906151	4822	5	0.16636
ARSI	6	0.10366	0.25499	1	4662	3	-0.023297	0.17552	0.3931	0.975177	8219	3	-0.023297
ARSJ	6	0.14021	0.32256	1	5633	3	-0.16582	0.8165	0.90532	1	17631	2	-0.16582
ARSK	6	0.37405	0.5914	1	10287	2	0.21139	0.070819	0.21328	0.906151	4783	4	0.21139
ART1	6	0.14629	0.33002	1	5746	2	0.21086	0.20261	0.43244	0.992576	8895	3	0.21086
ART3	6	0.18971	0.38232	1	6529	1	0.37983	0.04013	0.13479	0.880623	3100	5	0.37983
ART4	6	0.29514	0.50413	1	8573	3	0.065531	0.26398	0.51672	1	10430	3	0.065531
ART5	6	0.97499	0.97511	1	19803	0	0.55934	0.020366	0.078485	0.828035	1903	5	0.55934
ARTN	6	0.50182	0.67878	1	12136	1	0.37233	0.13086	0.32456	0.954023	6926	4	0.37233
ARV1	6	0.16692	0.35515	1	6094	3	0.035138	0.1338	0.32923	0.954428	7032	3	0.035138
ARVCF	6	0.74939	0.83922	1	15872	1	0.41249	0.040642	0.13622	0.880623	3132	4	0.41249
ARX	6	0.34803	0.56307	1	9715	1	0.28526	0.18152	0.4019	0.978101	8376	4	0.28526
AS3MT	6	0.76985	0.84599	1	16089	1	0.38301	0.17538	0.3929	0.975177	8216	4	0.38301
ASAH1	6	0.12869	0.30193	1	5340	3	-0.29855	0.98697	0.98705	1	19815	0	-0.29855
ASAH2	6	0.011213	0.043388	0.482868	1829	3	-0.73572	0.65561	0.82875	1	16179	2	-0.73572
ASAH2B	6	0.52215	0.69191	1	12439	2	0.018699	0.94594	0.95789	1	18951	1	0.018699
ASAP1	6	0.12017	0.28615	1	5111	2	0.18113	0.28394	0.54271	1	10908	4	0.18113
ASAP2	6	0.22413	0.42259	1	7151	3	0.05222	0.27281	0.52824	1	10642	3	0.05222
ASAP3	6	0.6624	0.78894	1	14667	1	0.15395	0.31625	0.57717	1	11486	3	0.15395
ASB1	6	0.21092	0.40727	1	6913	3	-0.055014	0.057989	0.18169	0.893537	4139	3	-0.055014
ASB10	6	0.95659	0.95659	1	19265	0	0.41542	0.11195	0.29411	0.939239	6377	3	0.41542
ASB11	6	0.48439	0.66767	1	11900	1	0.097164	0.066504	0.2028	0.904083	4568	3	0.097164
ASB12	6	0.54067	0.70421	1	12716	2	0.21581	0.12379	0.31324	0.949971	6712	3	0.21581
ASB13	6	0.33424	0.54786	1	9401	2	0.23954	0.099735	0.27409	0.932519	5986	3	0.23954
ASB14	6	0.1571	0.34326	1	5938	3	-0.16111	0.39849	0.64407	1	12732	1	-0.16111
ASB15	6	0.96715	0.96714	1	19563	0	0.21025	0.052038	0.16645	0.891444	3808	4	0.21025
ASB16	6	0.54845	0.70935	1	12834	2	0.42221	0.19007	0.41433	0.984589	8580	4	0.42221
ASB17	6	0.62816	0.7643	1	14094	1	0.48074	0.10196	0.2777	0.934027	6057	4	0.48074
ASB18	6	0.31297	0.52422	1	8936	3	-0.14335	0.33865	0.59552	1	11817	2	-0.14335
ASB2	6	0.15034	0.33499	1	5806	3	-0.12301	0.83411	0.91513	1	17865	2	-0.12301
ASB3	6	0.88605	0.89775	1	17604	1	0.32682	0.21387	0.44833	0.996393	9203	4	0.32682
ASB4	6	0.056939	0.1612	0.962265	3381	3	-0.34744	0.61543	0.81217	1	15834	2	-0.34744
ASB5	6	0.57504	0.72728	1	13230	1	0.19501	0.069898	0.21099	0.905925	4739	4	0.19501
ASB6	6	0.44689	0.64425	1	11396	1	0.47773	0.043067	0.14273	0.880623	3292	5	0.47773
ASB7	6	0.97109	0.97113	1	19677	0	0.26135	0.081646	0.23902	0.910182	5310	5	0.26135
ASB8	6	0.95194	0.95201	1	19144	0	0.21143	0.042613	0.14154	0.880623	3257	4	0.21143
ASB9	6	0.52386	0.69302	1	12467	2	-0.089035	0.74793	0.87028	1	16937	2	-0.089035
ASCC1	6	0.41472	0.62452	1	10949	1	0.49127	0.050742	0.16303	0.890245	3734	5	0.49127
ASCC2	6	0.22575	0.4245	1	7180	1	0.062915	0.62896	0.81769	1	15956	2	0.062915
ASCC3	6	0.30181	0.51165	1	8700	2	0.33934	0.15548	0.36298	0.969183	7636	4	0.33934
ASCL1	6	0.68675	0.80705	1	15089	1	0.14951	0.16561	0.37834	0.972609	7942	3	0.14951
ASCL2	6	0.37803	0.5958	1	10369	3	-0.057431	0.30692	0.56938	1	11360	2	-0.057431
ASCL3	6	0.94137	0.94151	1	18831	0	0.35991	0.11873	0.30509	0.944102	6573	4	0.35991
ASCL4	6	0.26822	0.47367	1	8030	2	0.091242	0.17208	0.38803	0.975177	8113	3	0.091242
ASCL5	6	0.65816	0.78583	1	14607	1	0.18629	0.046603	0.15214	0.886571	3498	3	0.18629
ASF1A	6	0.49948	0.67728	1	12103	1	0.55208	0.013613	0.057738	0.807368	1431	4	0.55208
ASF1B	6	0.087275	0.22287	1	4208	3	-0.20109	0.81976	0.90704	1	17670	2	-0.20109
ASGR1	6	0.52623	0.6946	1	12501	1	0.47278	0.038612	0.13065	0.880623	3008	4	0.47278
ASGR2	6	0.66492	0.79081	1	14704	1	0.16603	0.29176	0.55284	1	11078	4	0.16603
ASH1L	6	0.98157	0.98175	1	20015	0	0.27977	0.23727	0.48068	1	9757	4	0.27977
ASH2L	6	0.00023668	0.0012764	0.049274	535	6	-0.71084	0.99976	0.99976	1	20520	0	-0.71084
ASIC1	6	0.61061	0.7519	1	13789	1	1.1183	0.0015985	0.0080621	0.680397	226	5	1.1183
ASIC2	6	0.41064	0.62208	1	10896	2	0.10367	0.13442	0.33019	0.954471	7054	3	0.10367
ASIC3	6	0.37427	0.59164	1	10293	3	0.066009	0.15634	0.36431	0.969183	7668	3	0.066009
ASIC4	6	0.62554	0.76248	1	14047	2	0.33791	0.12549	0.31595	0.952272	6760	3	0.33791
ASIC5	6	0.53399	0.69975	1	12615	1	0.091596	0.13383	0.32928	0.954428	7033	3	0.091596
ASIP	6	0.9096	0.91365	1	18037	1	0.30349	0.23231	0.47389	1	9630	3	0.30349
ASL	6	0.98868	0.98878	1	20275	0	0.49327	0.011316	0.050188	0.790005	1270	6	0.49327
ASMT_X	6	0.51579	0.68781	1	12343	2	0.64344	0.0080311	0.036802	0.762898	947	4	0.64344
ASMTL_X	6	0.48756	0.66969	1	11939	1	0.22468	0.15277	0.35884	0.967498	7567	4	0.22468
ASNA1	6	0.0039021	0.017605	0.26882	1338	5	-1.6547	0.93184	0.95215	1	18759	1	-1.6547
ASNS	6	0.022053	0.078648	0.677489	2348	5	-0.54485	0.98459	0.98474	1	19736	0	-0.54485
ASNSD1	6	0.63651	0.77021	1	14222	1	0.22248	0.16365	0.37542	0.972609	7879	4	0.22248
ASPA	6	0.093314	0.23482	1	4369	4	-0.32856	0.47688	0.70626	1	13874	2	-0.32856
ASPDH	6	0.64541	0.77663	1	14377	1	-0.0094309	0.10109	0.2763	0.933766	6027	2	-0.0094309
ASPG	6	0.49455	0.67413	1	12023	2	0.19631	0.034344	0.11885	0.874283	2771	3	0.19631
ASPH	6	0.66832	0.7934	1	14763	1	0.76717	0.054236	0.1721	0.892827	3933	4	0.76717
ASPHD1	6	0.32713	0.54005	1	9239	1	0.52606	0.0069269	0.0321	0.761191	836	5	0.52606
ASPHD2	6	0.75842	0.84215	1	15953	1	0.53673	0.026583	0.096806	0.845874	2314	4	0.53673
ASPM	6	0.98293	0.98311	1	20057	0	0.2232	0.27176	0.52689	1	10617	4	0.2232
ASPRV1	6	0.33115	0.5445	1	9331	2	0.30935	0.16105	0.37147	0.971246	7810	4	0.30935
ASPSCR1	6	0.41171	0.62273	1	10914	2	-0.016876	0.23175	0.47316	1	9621	2	-0.016876
ASRGL1	6	0.21289	0.40957	1	6947	2	0.069231	0.42181	0.66262	1	13050	2	0.069231
ASS1	6	0.30289	0.51284	1	8720	3	0.16976	0.19547	0.42217	0.9889	8707	3	0.16976
ASTE1	6	0.87821	0.8931	1	17466	1	0.35335	0.06857	0.20778	0.905539	4672	5	0.35335
ASTL	6	0.95639	0.95638	1	19263	0	0.27302	0.05592	0.17644	0.893243	4015	5	0.27302
ASTN1	6	0.99145	0.9915	1	20357	0	0.3801	0.0085548	0.038938	0.76807	1005	6	0.3801
ASTN2	6	0.28841	0.49651	1	8427	3	-0.09562	0.34461	0.60037	1	11891	2	-0.09562
ASUN	6	0.00024461	0.001317	0.050393	540	6	-0.87371	0.9986	0.9986	1	20358	0	-0.87371
ASXL1	6	0.89042	0.90052	1	17675	1	0.38763	0.069884	0.21095	0.905925	4737	4	0.38763
ASXL2	6	0.68212	0.80364	1	15007	2	0.013314	0.54039	0.75597	1	14777	3	0.013314
ASXL3	6	0.99648	0.99653	1	20540	0	1.1853	0.0019792	0.009918	0.693136	282	6	1.1853
ASZ1	6	0.53729	0.70194	1	12668	1	0.56358	0.0033381	0.016196	0.741408	438	5	0.56358
ATAD1	6	0.12238	0.29027	1	5176	2	0.27623	0.12211	0.31055	0.948464	6662	3	0.27623
ATAD2	6	0.014651	0.054867	0.554289	2016	4	-1.1831	0.99453	0.99456	1	20115	0	-1.1831
ATAD2B	6	0.62507	0.76218	1	14038	1	0.34841	0.12617	0.31707	0.952839	6777	4	0.34841
ATAD3A	6	0.00095072	0.0049522	0.120035	845	6	-0.79486	0.99905	0.99905	1	20419	0	-0.79486
ATAD3B	6	0.025849	0.09044	0.729718	2505	5	-0.45344	0.99663	0.99668	1	20221	0	-0.45344
ATAD3C	6	0.056377	0.16	0.960162	3364	3	0.021257	0.005027	0.023765	0.761191	616	3	0.021257
ATAD5	6	0.11248	0.27174	1	4909	4	-0.24089	0.85518	0.92726	1	18111	2	-0.24089
ATAT1	6	0.037711	0.11941	0.834855	2898	3	-0.48178	0.94207	0.95625	1	18889	1	-0.48178
ATCAY	6	0.38983	0.60859	1	10604	2	0.54027	0.0076528	0.035195	0.761838	915	3	0.54027
ATE1	6	0.98184	0.98204	1	20023	0	1.003	0.0013629	0.0069486	0.680397	198	5	1.003
ATF1	6	0.52956	0.69687	1	12550	2	0.29385	0.16647	0.37961	0.973734	7965	4	0.29385
ATF2	6	0.90611	0.91113	1	17970	1	0.7647	0.012088	0.052914	0.797758	1324	4	0.7647
ATF3	6	0.34143	0.55577	1	9571	1	0.44021	0.051195	0.16425	0.890245	3761	5	0.44021
ATF4	6	0.011453	0.044191	0.487871	1843	5	-0.96212	0.94507	0.95752	1	18932	1	-0.96212
ATF5	6	0.0095118	0.037629	0.445332	1728	5	-1.111	0.9753	0.97573	1	19458	1	-1.111
ATF6	6	0.9957	0.99575	1	20516	0	0.45	0.0043042	0.020593	0.761191	532	6	0.45
ATF6B	6	0.059595	0.16674	0.974267	3453	3	-0.26085	0.29043	0.55113	1	11057	2	-0.26085
ATF7	6	0.21586	0.41302	1	6998	2	0.30474	0.15294	0.3591	0.967554	7574	4	0.30474
ATF7IP	6	0.098013	0.24409	1	4514	4	-0.22266	0.95266	0.96113	1	19037	1	-0.22266
ATF7IP2	6	0.80901	0.86023	1	16505	1	0.43194	0.054147	0.17187	0.892553	3929	4	0.43194
ATG10	6	0.087307	0.22294	1	4210	3	-0.095771	0.67221	0.83591	1	16317	2	-0.095771
ATG12	6	0.069756	0.18768	1	3740	3	-0.36838	0.15391	0.36059	0.968139	7598	2	-0.36838
ATG13	6	0.16944	0.35814	1	6141	2	0.32295	0.13974	0.33863	0.957267	7213	4	0.32295
ATG14	6	0.46478	0.65538	1	11639	2	0.043359	0.23147	0.47277	1	9614	3	0.043359
ATG16L1	6	0.31268	0.52391	1	8932	2	0.40898	0.17261	0.3888	0.975177	8131	4	0.40898
ATG16L2	6	0.13062	0.30555	1	5381	4	-0.24441	0.61391	0.81156	1	15824	2	-0.24441
ATG2A	6	0.37485	0.59229	1	10305	2	0.58503	0.10778	0.28726	0.937045	6239	4	0.58503
ATG2B	6	0.96235	0.96234	1	19427	0	0.23436	0.041369	0.1382	0.880623	3182	5	0.23436
ATG3	6	0.31905	0.53105	1	9059	2	-0.12371	0.96238	0.96641	1	19189	1	-0.12371
ATG4A	6	0.075986	0.20039	1	3913	2	0.27235	0.23951	0.48369	1	9819	4	0.27235
ATG4B	6	0.36495	0.58155	1	10092	2	0.3932	0.12464	0.3146	0.950863	6738	4	0.3932
ATG4C	6	0.31352	0.52482	1	8947	2	0.10796	0.38371	0.63213	1	12513	3	0.10796
ATG4D	6	0.85137	0.87888	1	17020	1	0.19689	0.12682	0.3181	0.952839	6798	4	0.19689
ATG5	6	0.31592	0.52756	1	8994	3	-0.099721	0.58959	0.79404	1	15516	2	-0.099721
ATG7	6	0.077734	0.2039	1	3956	3	-0.30211	0.41615	0.65805	1	12964	3	-0.30211
ATG9A	6	0.016478	0.060808	0.591505	2091	5	-0.40314	0.70178	0.849	1	16542	1	-0.40314
ATHL1	6	0.90162	0.90792	1	17886	1	0.4403	0.027433	0.099267	0.849288	2364	5	0.4403
ATIC	6	1.5e-05	9.45e-05	0.010902	178	5	-1.3708	0.79484	0.8938	1	17423	1	-1.3708
ATL1	6	0.11113	0.26919	1	4873	4	-0.16603	0.41815	0.65967	1	12989	2	-0.16603
ATL2	6	0.49288	0.67307	1	12006	2	0.51939	0.069782	0.2107	0.905925	4732	4	0.51939
ATL3	6	0.21663	0.4139	1	7009	2	0.21574	0.26537	0.51853	1	10470	4	0.21574
ATM	6	0.99831	0.99831	1	20613	0	1.1604	0.0016887	0.0085065	0.680397	239	6	1.1604
ATMIN	6	0.068566	0.18528	1	3707	3	-0.24284	0.020609	0.07921	0.828042	1924	2	-0.24284
ATN1	6	0.19707	0.39102	1	6662	3	-0.062854	0.43109	0.66992	1	13184	3	-0.062854
ATOH1	6	0.79109	0.85346	1	16298	1	0.44481	0.030854	0.10909	0.862534	2575	5	0.44481
ATOH7	6	0.049536	0.14526	0.917823	3201	4	-0.40274	0.78102	0.88673	1	17271	2	-0.40274
ATOH8	6	0.61302	0.75361	1	13826	2	0.19588	0.21378	0.4482	0.996314	9201	3	0.19588
ATOX1	6	0.46336	0.65447	1	11615	2	0.29303	0.011579	0.051246	0.791212	1295	4	0.29303
ATP10A	6	0.89384	0.90278	1	17727	1	0.43223	0.041135	0.13757	0.880623	3162	5	0.43223
ATP10B	6	0.91119	0.91484	1	18074	1	0.16393	0.52203	0.74179	1	14518	3	0.16393
ATP10D	6	0.97744	0.97756	1	19877	0	0.50387	0.013951	0.058814	0.807552	1453	5	0.50387
ATP11A	6	0.41354	0.62383	1	10939	2	0.22801	0.36116	0.61383	1	12167	3	0.22801
ATP11B	6	0.80492	0.85864	1	16462	1	0.49168	0.03928	0.13247	0.880623	3054	5	0.49168
ATP11C	6	0.9537	0.95376	1	19192	0	0.29325	0.052424	0.16743	0.8915	3833	5	0.29325
ATP12A	6	0.31637	0.52806	1	9003	3	-0.092477	0.43795	0.67533	1	13299	2	-0.092477
ATP13A1	6	0.10602	0.25946	1	4727	4	-0.36265	0.61192	0.81076	1	15805	1	-0.36265
ATP13A2	6	0.093701	0.23559	1	4380	3	-0.15703	0.85787	0.92888	1	18150	1	-0.15703
ATP13A3	6	0.21267	0.40931	1	6943	3	0.20671	0.069077	0.20901	0.905539	4700	3	0.20671
ATP13A4	6	0.96729	0.96729	1	19570	0	0.22406	0.20785	0.43982	0.993744	9038	4	0.22406
ATP13A5	6	0.86142	0.88397	1	17185	1	0.35499	0.14002	0.33905	0.957267	7221	4	0.35499
ATP1A1	6	0.00043694	0.0023153	0.072825	653	4	-1.082	0.79783	0.89537	1	17451	2	-1.082
ATP1A2	6	0.82569	0.86712	1	16708	1	0.28068	0.12517	0.31544	0.951621	6750	4	0.28068
ATP1A3	6	0.77744	0.84858	1	16179	1	0.19331	0.12817	0.32026	0.954023	6832	3	0.19331
ATP1A4	6	0.95452	0.95458	1	19218	0	1.3103	0.0047737	0.022648	0.761191	587	4	1.3103
ATP1B1	6	0.26825	0.4737	1	8031	3	0.016461	0.032542	0.1138	0.867647	2669	3	0.016461
ATP1B2	6	0.83336	0.87049	1	16808	1	0.6033	0.0071138	0.032903	0.761191	852	5	0.6033
ATP1B3	6	0.00033077	0.0017719	0.062658	584	5	-1.6593	0.36212	0.61464	1	12178	1	-1.6593
ATP1B4	6	0.7008	0.81779	1	15335	1	0.24307	0.25859	0.50951	1	10273	4	0.24307
ATP2A1	6	0.38087	0.59885	1	10435	3	0.30388	0.0082969	0.037894	0.763519	982	3	0.30388
ATP2A2	6	3.4e-06	2.51e-05	0.005233	95	5	-2.0793	0.86583	0.93366	1	18244	1	-2.0793
ATP2A3	6	0.78636	0.85172	1	16252	1	0.17329	0.020542	0.079006	0.828035	1917	2	0.17329
ATP2B1	6	0.00018624	0.0010382	0.043092	496	5	-1.3917	0.43137	0.67014	1	13187	1	-1.3917
ATP2B2	6	0.13935	0.3215	1	5620	4	-0.13714	0.95783	0.96376	1	19116	1	-0.13714
ATP2B3	6	0.79424	0.85461	1	16339	1	0.062803	0.12246	0.31112	0.948614	6678	2	0.062803
ATP2B4	6	0.22779	0.42692	1	7227	2	0.036693	0.030623	0.10843	0.861308	2558	2	0.036693
ATP2C1	6	0.11109	0.2691	1	4870	1	0.032393	0.050627	0.16272	0.890245	3729	2	0.032393
ATP2C2	6	0.13639	0.3161	1	5538	3	-0.00055077	0.10144	0.27684	0.933848	6040	3	-0.00055077
ATP4A	6	0.58716	0.73559	1	13422	1	0.23737	0.047621	0.1548	0.887302	3564	5	0.23737
ATP4B	6	0.64585	0.77696	1	14382	1	0.29087	0.24902	0.49653	1	10041	4	0.29087
ATP5A1	6	6.1e-06	4.38e-05	0.007613	119	6	-1.4673	0.99999	1	1	20648	0	-1.4673
ATP5B	6	0.012527	0.047785	0.512515	1901	4	-0.4378	0.9897	0.9898	1	19895	0	-0.4378
ATP5C1	6	0.22451	0.42304	1	7156	2	-0.058131	0.76753	0.87991	1	17125	2	-0.058131
ATP5D	6	0.003543	0.016277	0.257203	1292	5	-0.62297	0.98888	0.98899	1	19874	0	-0.62297
ATP5E	4	0.045985	0.11513	0.818167	3123	3	-1.0347	0.91005	0.91095	1	18548	1	-1.0347
ATP5F1	6	0.0022748	0.011297	0.198984	1154	6	-0.80426	0.99773	0.99776	1	20296	0	-0.80426
ATP5G1	6	0.76649	0.84481	1	16050	1	0.49412	0.030574	0.10828	0.860939	2555	5	0.49412
ATP5G2	6	0.59711	0.7425	1	13588	1	0.29537	0.056305	0.17741	0.893243	4044	5	0.29537
ATP5G3	6	0.97213	0.97217	1	19709	0	0.27251	0.12561	0.31616	0.952415	6764	4	0.27251
ATP5H	6	0.014455	0.054221	0.551775	2000	3	-1.1212	0.44977	0.68483	1	13494	1	-1.1212
ATP5I	6	0.040849	0.1264	0.856223	2989	4	-0.49347	0.85458	0.92691	1	18101	1	-0.49347
ATP5J	6	0.0013032	0.0066593	0.142846	953	5	-1.1865	0.77284	0.88259	1	17181	1	-1.1865
ATP5J2	6	0.014802	0.055372	0.557487	2023	4	-0.91964	0.96788	0.96996	1	19294	1	-0.91964
ATP5J2-PTCD1	6	0.0099183	0.039052	0.456713	1745	4	-0.57986	0.60318	0.80442	1	15697	1	-0.57986
ATP5L	6	0.20609	0.40167	1	6841	2	-0.092077	0.70794	0.8518	1	16598	2	-0.092077
ATP5L2	6	0.60096	0.74514	1	13644	2	0.22895	0.062557	0.19311	0.899723	4369	3	0.22895
ATP5O	6	0.0014671	0.0074346	0.153896	989	6	-0.53733	0.99853	0.99852	1	20351	0	-0.53733
ATP5S	6	0.92026	0.92198	1	18277	1	0.19263	0.29796	0.56073	1	11202	4	0.19263
ATP5SL	6	0.69153	0.8107	1	15175	2	0.0049467	0.12879	0.32127	0.954023	6848	2	0.0049467
ATP6AP1	6	0.00043054	0.0022818	0.072554	647	5	-2.1755	0.28692	0.54656	1	10973	1	-2.1755
ATP6AP1L	6	0.78625	0.85168	1	16250	1	0.2925	0.079754	0.23453	0.910182	5213	5	0.2925
ATP6AP2	6	3.44e-05	0.00019969	0.015777	262	5	-1.614	0.94829	0.95901	1	18988	1	-1.614
ATP6V0A1	6	0.48516	0.66815	1	11909	1	0.26411	0.12793	0.31988	0.954023	6822	4	0.26411
ATP6V0A2	6	0.3571	0.57295	1	9906	2	0.22115	0.29447	0.55631	1	11133	3	0.22115
ATP6V0A4	6	0.62809	0.76426	1	14092	1	0.089799	0.46693	0.69841	1	13756	2	0.089799
ATP6V0B	6	5.69e-06	4.09e-05	0.007174	118	5	-1.9616	0.93436	0.95309	1	18793	1	-1.9616
ATP6V0C	6	0.00019143	0.0010583	0.043464	502	6	-2.8345	0.99981	0.9998	1	20529	0	-2.8345
ATP6V0D1	6	0.00019502	0.0010783	0.043854	508	5	-2.6664	0.99305	0.99314	1	20036	0	-2.6664
ATP6V0D2	6	0.49624	0.67521	1	12048	2	-0.10793	0.67541	0.83729	1	16342	2	-0.10793
ATP6V0E1	6	0.036754	0.11724	0.827751	2868	4	-1.0084	0.84776	0.92289	1	18011	1	-1.0084
ATP6V0E2	6	0.42162	0.62874	1	11041	1	0.40223	0.20569	0.43677	0.993006	8974	4	0.40223
ATP6V1A	6	0.0068656	0.028369	0.372616	1557	5	-0.9178	0.94553	0.95771	1	18945	1	-0.9178
ATP6V1B1	6	0.054297	0.15552	0.947484	3319	3	-0.10322	0.20094	0.43004	0.991412	8855	3	-0.10322
ATP6V1B2	6	6.87e-07	6.94e-06	0.002815	50	6	-1.3563	0.99995	0.99995	1	20578	0	-1.3563
ATP6V1C1	6	0.91667	0.91906	1	18207	1	0.02613	0.49719	0.72227	1	14165	2	0.02613
ATP6V1C2	6	0.82928	0.86867	1	16750	1	0.31436	0.070796	0.21322	0.906151	4782	3	0.31436
ATP6V1D	6	0.065844	0.17971	1	3620	4	-0.36872	0.58721	0.79222	1	15477	2	-0.36872
ATP6V1E1	6	0.084103	0.21658	1	4136	3	-0.22653	0.56431	0.77442	1	15143	1	-0.22653
ATP6V1E2	6	0.21432	0.41124	1	6967	2	0.18629	0.26145	0.51339	1	10358	4	0.18629
ATP6V1F	6	0.044527	0.13447	0.883657	3077	4	-0.52441	0.81891	0.90657	1	17660	1	-0.52441
ATP6V1G1	6	0.00024737	0.0013352	0.050636	543	6	-1.3672	0.99975	0.99975	1	20516	0	-1.3672
ATP6V1G2	6	0.38892	0.60763	1	10589	3	-0.084922	0.45521	0.68916	1	13582	2	-0.084922
ATP6V1G3	6	0.70603	0.82178	1	15426	1	0.17138	0.23922	0.48328	1	9811	3	0.17138
ATP6V1H	6	0.0079262	0.032128	0.40184	1633	5	-0.73757	0.77168	0.88203	1	17170	1	-0.73757
ATP7A	6	0.76012	0.84273	1	15976	1	0.49222	0.02211	0.083675	0.830034	2020	5	0.49222
ATP7B	6	0.3834	0.60163	1	10483	1	0.12542	0.50135	0.72554	1	14226	3	0.12542
ATP8A1	6	0.86065	0.88357	1	17174	1	0.044394	0.58846	0.79317	1	15498	3	0.044394
ATP8A2	6	0.099162	0.24638	1	4545	3	-0.036045	0.54972	0.76319	1	14932	3	-0.036045
ATP8B1	4	0.40961	0.55696	1	10875	1	0.00061927	0.56483	0.71319	1	15151	2	0.00061927
ATP8B2	6	0.80668	0.85933	1	16483	1	0.57318	0.04168	0.13903	0.880623	3202	4	0.57318
ATP8B3	6	0.31585	0.52748	1	8992	3	0.040261	0.43994	0.67696	1	13333	3	0.040261
ATP8B4	6	0.44266	0.64165	1	11345	2	-0.05912	0.97444	0.97498	1	19433	1	-0.05912
ATP9A	6	0.71435	0.82813	1	15573	2	0.050737	0.046979	0.15313	0.886571	3520	3	0.050737
ATP9B	6	0.38929	0.60801	1	10595	1	0.29346	0.044781	0.1473	0.883033	3409	5	0.29346
ATPAF1	6	0.63431	0.76868	1	14187	2	0.19035	0.5267	0.74543	1	14576	3	0.19035
ATPAF2	6	0.12408	0.29341	1	5222	2	-0.014724	0.56926	0.77828	1	15210	2	-0.014724
ATPBD4	6	0.00072004	0.0037784	0.100145	771	4	-0.99152	0.75447	0.87348	1	17004	2	-0.99152
ATPIF1	6	0.30475	0.51494	1	8762	3	-0.19399	0.69789	0.84722	1	16513	2	-0.19399
ATR	6	0.012666	0.048253	0.515204	1908	5	-0.68864	0.97102	0.97222	1	19350	1	-0.68864
ATRAID	6	0.019833	0.07168	0.645387	2258	5	-0.31541	0.53899	0.75488	1	14757	1	-0.31541
ATRIP	6	0.9231	0.92435	1	18343	1	0.54634	0.030375	0.10771	0.860939	2539	5	0.54634
ATRN	6	0.49416	0.67389	1	12020	2	-0.0005273	0.34567	0.60123	1	11908	2	-0.0005273
ATRNL1	6	0.94923	0.94928	1	19060	0	0.48485	0.086145	0.2495	0.913298	5536	4	0.48485
ATRX	6	0.76514	0.84436	1	16035	1	0.45667	0.050234	0.16166	0.88899	3711	5	0.45667
ATXN1	6	0.32566	0.53838	1	9201	1	0.34104	0.15754	0.36612	0.969866	7704	4	0.34104
ATXN10	6	0.028443	0.098399	0.756848	2621	3	-0.13102	0.6098	0.80941	1	15771	2	-0.13102
ATXN1L	6	0.55912	0.71641	1	12978	1	0.30074	0.058758	0.18363	0.895015	4177	5	0.30074
ATXN2	6	0.31989	0.53201	1	9078	2	0.2615	0.1281	0.32014	0.954023	6829	3	0.2615
ATXN2L	6	0.0070821	0.029145	0.381554	1564	5	-0.75219	0.93178	0.95213	1	18756	1	-0.75219
ATXN3	6	0.99033	0.99041	1	20328	0	0.83777	0.00093462	0.0048761	0.66405	144	6	0.83777
ATXN3L	6	0.22995	0.4294	1	7278	2	-0.025008	0.53136	0.74908	1	14650	2	-0.025008
ATXN7	6	0.14923	0.33361	1	5798	2	0.36589	0.097063	0.26963	0.928731	5895	4	0.36589
ATXN7L1	6	0.10136	0.25056	1	4597	4	-0.23801	0.10377	0.2807	0.935096	6110	1	-0.23801
ATXN7L2	6	0.29554	0.50455	1	8581	1	0.50618	0.042456	0.14111	0.880623	3248	5	0.50618
ATXN7L3	6	0.062781	0.17341	0.988606	3547	4	-0.43521	0.82991	0.91272	1	17798	2	-0.43521
ATXN7L3B	6	0.54236	0.70534	1	12741	2	0.093494	0.81777	0.90599	1	17651	2	0.093494
AUH	6	0.32123	0.53346	1	9102	2	0.51378	0.083505	0.24335	0.911276	5407	4	0.51378
AUNIP	6	0.082352	0.21313	1	4089	4	-0.3443	0.96969	0.97124	1	19325	1	-0.3443
AUP1	6	0.40076	0.61613	1	10767	2	0.20989	0.24858	0.49592	1	10032	4	0.20989
AURKA	6	0.0014418	0.0073236	0.152409	982	6	-0.69915	0.99856	0.99854	1	20353	0	-0.69915
AURKAIP1	6	0.059452	0.16645	0.974267	3445	3	-0.079299	0.035805	0.12286	0.878335	2846	2	-0.079299
AURKB	6	0.0055829	0.023709	0.331824	1459	5	-1.5121	0.30392	0.56684	1	11316	1	-1.5121
AURKC	6	0.24695	0.44898	1	7613	3	-0.20192	0.26595	0.5193	1	10483	2	-0.20192
AUTS2	6	0.97397	0.97405	1	19776	0	0.52499	0.027285	0.098817	0.847708	2358	5	0.52499
AVEN	6	0.14387	0.3271	1	5703	3	-0.1065	0.33446	0.59209	1	11758	3	-0.1065
AVIL	6	0.05106	0.14862	0.927927	3240	4	-0.17374	0.8092	0.90136	1	17561	1	-0.17374
AVL9	6	0.45299	0.64804	1	11479	1	0.05409	0.2485	0.49582	1	10028	2	0.05409
AVP	6	0.98343	0.98361	1	20067	0	0.59851	0.070293	0.21197	0.906151	4758	5	0.59851
AVPI1	6	0.8642	0.88542	1	17227	1	0.21964	0.31572	0.57674	1	11478	3	0.21964
AVPR1A	6	0.17145	0.36057	1	6176	3	-0.11839	0.15111	0.35625	0.965741	7529	2	-0.11839
AVPR1B	6	0.016766	0.06174	0.596135	2106	3	-0.45141	0.8596	0.9299	1	18176	2	-0.45141
AVPR2	6	0.98672	0.98679	1	20190	0	0.28668	0.049832	0.1606	0.888815	3687	5	0.28668
AWAT1	6	0.21585	0.41301	1	6997	3	-0.036826	0.50102	0.7253	1	14222	3	-0.036826
AWAT2	6	0.98046	0.98063	1	19972	0	0.24945	0.21764	0.45357	0.998517	9293	4	0.24945
AXDND1	6	0.61357	0.75402	1	13833	1	0.29405	0.24859	0.49594	1	10034	4	0.29405
AXIN1	6	0.74348	0.83735	1	15811	1	0.045631	0.31305	0.57449	1	11438	2	0.045631
AXIN2	6	0.81584	0.86303	1	16581	1	0.29616	0.024946	0.092041	0.837101	2219	4	0.29616
AXL	6	0.45167	0.64722	1	11462	1	0.32136	0.12046	0.30788	0.947189	6611	4	0.32136
AZGP1	6	0.94281	0.94292	1	18870	0	0.29377	0.22146	0.45882	0.999997	9389	3	0.29377
AZI1	6	0.95506	0.9551	1	19229	0	0.15964	0.3888	0.63628	1	12587	3	0.15964
AZI2	6	0.067193	0.18246	1	3660	3	-0.27601	0.6725	0.83604	1	16321	2	-0.27601
AZIN1	6	0.026101	0.091218	0.732054	2519	5	-0.36321	0.94807	0.95891	1	18985	1	-0.36321
AZU1	6	0.090684	0.22969	1	4295	3	-0.14946	0.46636	0.69796	1	13749	3	-0.14946
B2M	6	0.80089	0.85705	1	16409	1	0.13537	0.28921	0.54955	1	11031	4	0.13537
B3GALNT1	6	0.39757	0.61423	1	10725	2	0.27865	0.15389	0.36055	0.968139	7597	3	0.27865
B3GALNT2	6	0.24061	0.44169	1	7478	3	0.0082773	0.27716	0.53394	1	10756	3	0.0082773
B3GALT1	6	0.33356	0.54713	1	9388	3	-0.087425	0.84261	0.91992	1	17953	2	-0.087425
B3GALT2	6	0.2981	0.50743	1	8633	3	-0.098264	0.52005	0.74027	1	14483	2	-0.098264
B3GALT4	6	0.31579	0.52741	1	8989	3	-0.069742	0.69698	0.84676	1	16508	2	-0.069742
B3GALT5	6	0.653	0.78212	1	14514	2	-0.027415	0.36726	0.6188	1	12255	2	-0.027415
B3GALT6	6	0.98529	0.98543	1	20137	0	0.77658	0.0034645	0.016811	0.741576	453	5	0.77658
B3GALTL	6	0.33531	0.54907	1	9424	3	-0.026923	0.76066	0.87652	1	17057	2	-0.026923
B3GAT1	6	0.52572	0.69426	1	12492	2	-0.14043	0.83511	0.9157	1	17876	2	-0.14043
B3GAT2	6	0.9061	0.91112	1	17969	1	0.73752	0.023065	0.086515	0.830034	2093	5	0.73752
B3GAT3	6	0.64367	0.77536	1	14350	2	0.21644	0.0559	0.17638	0.893243	4010	3	0.21644
B3GNT1	6	0.16804	0.35647	1	6117	3	-0.27626	0.73152	0.86254	1	16797	2	-0.27626
B3GNT2	6	0.84257	0.87469	1	16920	1	0.18067	0.2671	0.5208	1	10505	4	0.18067
B3GNT3	6	0.13004	0.30447	1	5368	4	-0.26793	0.6502	0.82654	1	16131	2	-0.26793
B3GNT4	6	0.78095	0.84982	1	16209	1	0.89552	0.012465	0.054107	0.800462	1346	4	0.89552
B3GNT5	6	0.57125	0.7247	1	13175	2	0.64393	0.0037988	0.018309	0.753718	485	4	0.64393
B3GNT6	6	0.79124	0.85351	1	16300	1	0.47273	0.028045	0.10103	0.855287	2389	4	0.47273
B3GNT7	6	0.61637	0.75602	1	13881	1	0.23945	0.16934	0.38391	0.975177	8031	4	0.23945
B3GNT8	6	0.48372	0.66724	1	11891	2	0.20748	0.26319	0.51566	1	10400	4	0.20748
B3GNT9	6	0.077234	0.2029	1	3946	3	-0.16964	0.79687	0.89487	1	17442	2	-0.16964
B3GNTL1	6	0.28517	0.49284	1	8354	3	-0.16245	0.64462	0.82416	1	16079	1	-0.16245
B4GALNT1	6	0.91752	0.91973	1	18217	1	0.33894	0.026501	0.096583	0.845143	2310	4	0.33894
B4GALNT2	6	0.60937	0.75101	1	13771	2	0.092	0.24116	0.48598	1	9861	3	0.092
B4GALNT3	6	0.59751	0.74277	1	13596	2	-0.018918	0.094204	0.26473	0.923368	5822	2	-0.018918
B4GALNT4	6	0.7797	0.84939	1	16198	1	0.20095	0.19594	0.42285	0.988904	8718	4	0.20095
B4GALT1	6	0.75877	0.84226	1	15960	1	0.24492	0.057544	0.18053	0.893537	4114	5	0.24492
B4GALT2	6	0.18582	0.37772	1	6447	1	0.023915	0.40438	0.64875	1	12804	2	0.023915
B4GALT3	6	0.32303	0.53547	1	9144	3	-0.31402	0.97551	0.97592	1	19462	1	-0.31402
B4GALT4	6	0.47698	0.66302	1	11792	2	-0.024422	0.16424	0.37631	0.972609	7896	2	-0.024422
B4GALT5	6	0.85934	0.88292	1	17155	1	1.0308	0.0054952	0.025792	0.761191	674	5	1.0308
B4GALT6	6	0.31398	0.52533	1	8954	2	0.004064	0.69952	0.84797	1	16523	2	0.004064
B4GALT7	6	0.85314	0.87976	1	17058	1	0.43021	0.015717	0.064303	0.814685	1581	5	0.43021
B9D1	6	0.50506	0.68085	1	12183	1	0.25703	0.26507	0.51813	1	10458	4	0.25703
B9D2	6	0.31714	0.5289	1	9017	2	0.096791	0.33023	0.58868	1	11698	3	0.096791
BAALC	6	0.93303	0.93327	1	18599	1	0.39462	0.16313	0.37463	0.972609	7865	4	0.39462
BAAT	6	0.578	0.72926	1	13272	1	0.14533	0.36134	0.61397	1	12170	3	0.14533
BABAM1	6	0.54293	0.70573	1	12746	2	-0.11538	0.84916	0.92372	1	18028	2	-0.11538
BACE1	6	0.70933	0.8243	1	15490	2	0.36838	0.062349	0.19259	0.898893	4361	4	0.36838
BACE2	6	0.74364	0.83739	1	15812	1	0.027731	0.74267	0.86774	1	16889	2	0.027731
BACH1	6	0.10918	0.26544	1	4814	4	-0.36669	0.90224	0.94285	1	18487	1	-0.36669
BACH2	6	0.26401	0.46884	1	7945	3	0.028217	0.31349	0.57485	1	11442	3	0.028217
BAD	6	0.3511	0.56647	1	9777	3	0.038312	0.41616	0.65805	1	12965	3	0.038312
BAG1	6	0.49655	0.67541	1	12055	2	0.47884	0.096775	0.26913	0.928731	5886	4	0.47884
BAG2	6	0.1201	0.28604	1	5108	3	-0.13524	0.74563	0.86919	1	16909	2	-0.13524
BAG3	6	0.54943	0.71002	1	12847	2	0.076209	0.17829	0.39718	0.97597	8292	2	0.076209
BAG4	6	0.044097	0.13354	0.879517	3072	4	-0.32378	0.70973	0.85257	1	16615	1	-0.32378
BAG5	6	0.92136	0.9229	1	18303	1	0.41229	0.067634	0.20554	0.904132	4633	5	0.41229
BAG6	6	0.81753	0.86374	1	16605	1	1.0196	0.00051724	0.0027213	0.600356	87	5	1.0196
BAGE	6	0.00044253	0.0023444	0.073197	660	5	-0.9349	0.91479	0.94647	1	18600	1	-0.9349
BAGE2	6	0.020402	0.073467	0.654652	2280	4	-0.66509	0.74135	0.86712	1	16880	2	-0.66509
BAGE3	2	0.29102	0.33535	1	8477	1	-0.29183	0.44112	0.49118	1	13347	1	-0.29183
BAHCC1	6	0.55462	0.71346	1	12919	2	0.26998	0.14105	0.34066	0.957267	7253	3	0.26998
BAHD1	6	0.88711	0.89841	1	17622	1	0.89083	0.0015373	0.0077713	0.680397	221	5	0.89083
BAI1	6	0.38754	0.60613	1	10565	2	0.11403	0.35699	0.61044	1	12081	3	0.11403
BAI2	6	0.97232	0.97235	1	19713	0	0.62554	0.069751	0.21062	0.905925	4731	5	0.62554
BAI3	6	0.27207	0.478	1	8106	3	0.011012	0.14603	0.3484	0.961962	7390	3	0.011012
BAIAP2	6	0.92184	0.92327	1	18314	1	0.10665	0.58293	0.78888	1	15408	3	0.10665
BAIAP2L1	6	0.98128	0.98146	1	20004	0	0.47725	0.0094664	0.042716	0.775634	1093	5	0.47725
BAIAP2L2	6	0.38207	0.60014	1	10453	3	-0.05695	0.036368	0.12447	0.878335	2877	2	-0.05695
BAIAP3	6	0.9969	0.99696	1	20556	0	0.80917	0.0031029	0.015159	0.724107	420	6	0.80917
BAK1	6	0.48393	0.66738	1	11893	1	0.42419	0.013715	0.058051	0.807552	1436	5	0.42419
BAMBI	6	0.27538	0.48179	1	8162	3	0.020254	0.098104	0.27132	0.929825	5930	3	0.020254
BANF1	6	0.00036057	0.0019221	0.065076	608	5	-1.3603	0.68301	0.84061	1	16396	1	-1.3603
BANF2	6	0.13227	0.30858	1	5425	3	-0.11452	0.61018	0.80972	1	15780	3	-0.11452
BANK1	6	0.085722	0.21982	1	4180	3	-0.40576	0.56138	0.77215	1	15104	3	-0.40576
BANP	6	0.0010537	0.0054377	0.126329	883	4	-1.262	0.37243	0.6229	1	12343	2	-1.262
BAP1	6	0.00078539	0.0041166	0.106528	789	6	-0.7057	0.99921	0.99922	1	20434	0	-0.7057
BARD1	6	4.82e-05	0.00026666	0.018385	299	5	-3.7043	0.38777	0.63546	1	12570	1	-3.7043
BARHL1	6	0.44396	0.64244	1	11357	2	0.084388	0.30952	0.57152	1	11392	3	0.084388
BARHL2	6	0.52964	0.69692	1	12551	1	0.26003	0.18591	0.40832	0.980588	8492	4	0.26003
BARX1	6	0.80322	0.85796	1	16440	1	0.55256	0.05721	0.17971	0.893243	4095	4	0.55256
BARX2	6	0.60876	0.7506	1	13763	2	0.084038	0.43496	0.67299	1	13238	3	0.084038
BASP1	6	0.54375	0.70626	1	12758	2	0.065856	0.58314	0.78904	1	15413	3	0.065856
BATF	6	0.52336	0.69271	1	12455	2	0.21888	0.20804	0.44006	0.993744	9042	4	0.21888
BATF2	6	0.1604	0.34725	1	5991	3	-0.072106	0.19524	0.42182	0.98876	8700	3	-0.072106
BATF3	6	0.89023	0.9004	1	17673	1	0.34427	0.17345	0.39004	0.975177	8150	4	0.34427
BAX	6	0.54158	0.70483	1	12727	2	0.24123	0.20368	0.43397	0.992719	8926	4	0.24123
BAZ1A	6	0.96331	0.96329	1	19460	0	0.18413	0.04725	0.15387	0.886571	3537	4	0.18413
BAZ1B	6	0.02606	0.091086	0.731485	2518	4	-0.6732	0.89395	0.94067	1	18427	1	-0.6732
BAZ2A	6	0.79461	0.85474	1	16345	1	0.20467	0.085684	0.24842	0.91298	5508	5	0.20467
BAZ2B	6	0.00084941	0.0044432	0.112028	810	4	-1.7753	0.44322	0.67963	1	13382	2	-1.7753
BBC3	6	0.74793	0.83876	1	15854	1	0.59675	0.060518	0.18802	0.897024	4266	4	0.59675
BBIP1	6	0.74652	0.83833	1	15835	1	0.49819	0.079807	0.23466	0.910182	5217	4	0.49819
BBOX1	6	0.55536	0.71397	1	12927	1	0.28006	0.057367	0.18011	0.893537	4100	4	0.28006
BBS1	6	0.38862	0.60728	1	10585	3	0.21861	0.23393	0.47606	1	9670	3	0.21861
BBS10	6	0.2004	0.39499	1	6728	2	0.37214	0.098846	0.27257	0.930919	5961	4	0.37214
BBS12	6	0.32122	0.53345	1	9101	1	0.21545	0.25605	0.50607	1	10211	4	0.21545
BBS2	6	0.79469	0.85476	1	16346	1	0.11675	0.56856	0.77772	1	15202	3	0.11675
BBS4	6	0.080659	0.20968	1	4037	4	-0.23863	0.71734	0.85607	1	16680	2	-0.23863
BBS5	6	0.84737	0.87692	1	16971	1	0.40099	0.050097	0.16128	0.88899	3703	5	0.40099
BBS7	6	0.21192	0.40843	1	6930	3	-0.08915	0.6617	0.83135	1	16225	2	-0.08915
BBS9	6	0.7992	0.85643	1	16391	1	0.10021	0.28872	0.54886	1	11024	3	0.10021
BBX	6	0.12089	0.28746	1	5133	3	-0.28111	0.60937	0.80908	1	15766	2	-0.28111
BCAM	6	0.69725	0.81504	1	15269	2	0.18486	0.14525	0.34719	0.960635	7370	4	0.18486
BCAN	6	0.89842	0.90576	1	17823	1	0.19684	0.24515	0.49132	1	9942	3	0.19684
BCAP29	6	0.87722	0.89254	1	17448	1	0.33625	0.18416	0.40573	0.979892	8444	4	0.33625
BCAP31	6	0.14532	0.32885	1	5727	2	0.12718	0.42704	0.6667	1	13123	3	0.12718
BCAR1	6	0.82013	0.86481	1	16645	1	0.22588	0.022999	0.086332	0.830034	2086	4	0.22588
BCAR3	6	0.85601	0.88123	1	17104	1	0.31408	0.15622	0.36411	0.969183	7662	4	0.31408
BCAS1	6	0.79571	0.85513	1	16358	1	0.39183	0.11506	0.29916	0.942025	6465	4	0.39183
BCAS2	6	0.0012506	0.0064081	0.139483	939	6	-0.95927	0.99875	0.99874	1	20378	0	-0.95927
BCAS3	6	0.23518	0.4354	1	7372	3	-0.17456	0.66769	0.83395	1	16279	2	-0.17456
BCAS4	6	0.35521	0.57091	1	9861	3	0.095798	0.37438	0.62449	1	12380	3	0.095798
BCAT1	6	0.54819	0.70917	1	12831	2	0.1346	0.38909	0.63652	1	12589	3	0.1346
BCAT2	6	0.42322	0.62972	1	11071	2	0.2076	0.28713	0.54682	1	10974	3	0.2076
BCCIP	6	0.019104	0.069319	0.633513	2225	4	-1.1381	0.57935	0.78611	1	15362	1	-1.1381
BCDIN3D	6	0.45345	0.64832	1	11487	2	0.29334	0.23615	0.47912	1	9730	4	0.29334
BCHE	6	0.44914	0.64568	1	11431	2	0.11609	0.57291	0.7811	1	15252	3	0.11609
BCKDHA	6	0.92864	0.92923	1	18487	1	0.065279	0.038914	0.13148	0.880623	3029	3	0.065279
BCKDHB	6	0.2262	0.42504	1	7190	3	-0.065324	0.76222	0.87726	1	17076	2	-0.065324
BCKDK	6	0.73581	0.83502	1	15743	1	0.14647	0.25538	0.50517	1	10200	4	0.14647
BCL10	6	0.093926	0.23604	1	4391	4	-0.49935	0.86602	0.93378	1	18249	1	-0.49935
BCL11A	6	0.96196	0.96194	1	19415	0	0.46757	0.05857	0.18315	0.894149	4171	5	0.46757
BCL11B	6	0.47734	0.66326	1	11801	1	0.29947	0.016142	0.065578	0.816005	1615	5	0.29947
BCL2	6	0.00012872	0.00070192	0.032962	438	6	-2.2131	0.99987	0.99987	1	20546	0	-2.2131
BCL2A1	6	0.24742	0.4495	1	7619	3	-0.0078133	0.44953	0.68465	1	13492	3	-0.0078133
BCL2L1	6	0.55564	0.71415	1	12934	2	0.19948	0.30835	0.57056	1	11377	3	0.19948
BCL2L10	6	0.80368	0.85814	1	16449	1	0.54252	0.072719	0.21784	0.907622	4875	4	0.54252
BCL2L11	6	0.3208	0.53301	1	9096	3	-0.14082	0.26338	0.51592	1	10406	2	-0.14082
BCL2L12	6	0.49923	0.67712	1	12100	2	0.23245	0.1445	0.34605	0.960545	7350	3	0.23245
BCL2L13	6	0.91695	0.91929	1	18212	1	0.40014	0.0060202	0.02812	0.761191	728	5	0.40014
BCL2L14	6	0.53394	0.69971	1	12614	1	0.27426	0.094594	0.26541	0.923511	5836	3	0.27426
BCL2L15	6	0.93305	0.93328	1	18600	1	0.25573	0.23954	0.48373	1	9820	4	0.25573
BCL2L2	6	0.64874	0.77907	1	14442	2	0.13832	0.20018	0.42894	0.990647	8836	3	0.13832
BCL2L2-PABPN1	6	1.31e-07	2.15e-06	0.001392	30	6	-2.6438	0.99992	0.99992	1	20568	0	-2.6438
BCL3	6	0.19121	0.38409	1	6556	1	0.24263	0.19291	0.41847	0.986147	8652	4	0.24263
BCL6	6	0.014456	0.054221	0.551775	2001	4	-1.0366	0.4806	0.70917	1	13932	2	-1.0366
BCL6B	6	0.33206	0.5455	1	9357	3	0.12353	0.23763	0.48116	1	9766	3	0.12353
BCL7A	6	0.69925	0.81662	1	15306	2	0.13538	0.53246	0.74992	1	14667	3	0.13538
BCL7B	6	0.80507	0.85869	1	16464	1	0.78167	0.011128	0.049437	0.787662	1252	5	0.78167
BCL7C	6	0.96502	0.965	1	19497	0	0.24433	0.059477	0.1854	0.896551	4213	3	0.24433
BCL9	6	0.1812	0.3722	1	6362	3	0.028617	0.32465	0.5841	1	11626	3	0.028617
BCL9L	6	0.24158	0.44282	1	7497	2	0.22424	0.22959	0.47019	1	9570	4	0.22424
BCLAF1	6	0.00069846	0.0036622	0.098579	760	5	-1.2814	0.88871	0.93933	1	18396	1	-1.2814
BCMO1	6	0.24905	0.45139	1	7644	1	0.12197	0.56395	0.77415	1	15136	3	0.12197
BCO2	6	0.13698	0.31718	1	5556	2	0.27219	0.0028033	0.013773	0.714521	383	3	0.27219
BCOR	6	0.62561	0.76253	1	14048	2	0.51379	0.0048866	0.02315	0.761191	602	4	0.51379
BCORL1	6	0.91281	0.91609	1	18105	1	0.27809	0.14629	0.34878	0.962568	7393	3	0.27809
BCR	6	0.022658	0.080543	0.686386	2372	1	0.18434	0.52205	0.7418	1	14519	3	0.18434
BCS1L	6	0.011803	0.045363	0.495224	1867	3	-0.50852	0.68978	0.84361	1	16445	2	-0.50852
BDH1	6	0.90707	0.91182	1	17987	1	0.24812	0.21328	0.44747	0.995853	9188	4	0.24812
BDH2	6	0.45001	0.64622	1	11440	2	0.061279	0.17644	0.39444	0.975199	8251	3	0.061279
BDKRB1	6	0.82043	0.86494	1	16649	1	0.37221	0.19881	0.42698	0.990064	8794	4	0.37221
BDKRB2	6	0.13205	0.30816	1	5418	3	-0.35536	0.54572	0.76011	1	14860	1	-0.35536
BDNF	6	0.14216	0.32494	1	5674	2	0.25998	0.12935	0.32215	0.954023	6866	4	0.25998
BDP1	6	0.076945	0.20233	1	3940	3	-0.4904	0.50449	0.72803	1	14264	2	-0.4904
BEAN1	6	0.063074	0.17402	0.990438	3551	2	0.11016	0.52786	0.74633	1	14590	3	0.11016
BECN1	6	0.0036526	0.016672	0.261219	1303	4	-0.75886	0.91692	0.94714	1	18621	1	-0.75886
BEGAIN	6	0.96779	0.96778	1	19588	0	0.65296	0.019218	0.075016	0.825026	1828	5	0.65296
BEND2	5	0.22186	0.40665	1	7105	2	0.71033	0.02042	0.075819	0.826733	1909	3	0.71033
BEND3	6	0.95761	0.95757	1	19289	0	0.52844	0.017637	0.070197	0.816005	1724	5	0.52844
BEND4	6	0.63879	0.77186	1	14268	2	0.11501	0.26762	0.52151	1	10520	3	0.11501
BEND5	6	0.52351	0.69281	1	12459	1	0.45604	0.015116	0.062477	0.814594	1535	5	0.45604
BEND6	6	0.80338	0.85802	1	16444	1	0.23786	0.10671	0.2855	0.936682	6206	4	0.23786
BEND7	6	0.26894	0.47449	1	8044	2	0.23511	0.22055	0.45756	0.999595	9364	4	0.23511
BEST1	6	0.42282	0.62948	1	11062	2	-0.0063493	0.69649	0.84655	1	16502	2	-0.0063493
BEST2	6	0.15893	0.34549	1	5962	3	-0.06454	0.7951	0.89393	1	17426	2	-0.06454
BEST3	6	0.68294	0.80424	1	15019	1	0.26783	0.05559	0.17561	0.893243	3993	5	0.26783
BEST4	6	0.46277	0.65409	1	11604	2	0.22725	0.48575	0.71322	1	14014	3	0.22725
BET1	6	0.0073278	0.030027	0.387177	1583	4	-0.57392	0.15888	0.36816	0.970476	7740	2	-0.57392
BET1L	6	0.86185	0.88421	1	17191	1	0.5452	0.04787	0.15548	0.887526	3575	4	0.5452
BET3L	6	0.01698	0.062434	0.599161	2119	4	-0.53291	0.19383	0.41979	0.986912	8673	1	-0.53291
BEX1	6	0.64724	0.77796	1	14411	2	0.021482	0.75633	0.87439	1	17021	2	0.021482
BEX2	6	0.89175	0.90139	1	17698	1	0.46939	0.031376	0.11054	0.863432	2609	5	0.46939
BEX4	6	0.22482	0.42342	1	7162	2	0.28943	0.1185	0.30473	0.943599	6569	4	0.28943
BEX5	6	0.44572	0.64352	1	11375	2	0.31263	0.17932	0.39871	0.976944	8321	4	0.31263
BFAR	6	0.95481	0.95485	1	19226	0	0.35239	0.062026	0.19179	0.89825	4346	5	0.35239
BFSP1	6	0.53766	0.7022	1	12678	2	0.30251	0.11297	0.29581	0.940797	6405	4	0.30251
BFSP2	6	0.067385	0.18288	1	3668	3	-0.23132	0.81639	0.90526	1	17628	1	-0.23132
BGLAP	6	0.24016	0.44116	1	7465	3	-0.13433	0.68779	0.84271	1	16429	2	-0.13433
BGN	6	0.1297	0.30383	1	5363	4	-0.23938	0.97937	0.97951	1	19574	1	-0.23938
BHLHA15	6	0.27497	0.48132	1	8155	3	0.13967	0.39933	0.64474	1	12743	3	0.13967
BHLHA9	6	0.50638	0.6817	1	12202	2	0.1368	0.53116	0.74892	1	14644	2	0.1368
BHLHB9	6	0.36753	0.58432	1	10147	1	0.28277	0.076174	0.22613	0.908717	5047	5	0.28277
BHLHE22	6	0.66907	0.79396	1	14777	1	0.17351	0.57512	0.78281	1	15293	3	0.17351
BHLHE40	6	0.9556	0.95561	1	19239	0	0.12863	0.49256	0.71855	1	14114	3	0.12863
BHLHE41	6	0.83814	0.87265	1	16860	1	0.46446	0.043419	0.14372	0.880623	3325	5	0.46446
BHMT	6	0.48541	0.66831	1	11914	2	0.047343	0.47466	0.70449	1	13845	3	0.047343
BHMT2	6	0.59363	0.74009	1	13534	2	0.094532	0.36645	0.61815	1	12238	2	0.094532
BICC1	6	0.33995	0.55416	1	9538	2	0.15257	0.46883	0.69989	1	13779	3	0.15257
BICD1	6	0.57984	0.73057	1	13300	2	0.3102	0.04424	0.14592	0.88275	3372	4	0.3102
BICD2	6	0.68077	0.80261	1	14969	2	0.081357	0.22599	0.46526	1	9501	2	0.081357
BID	6	0.22498	0.42362	1	7164	1	0.079196	0.60049	0.8024	1	15665	3	0.079196
BIK	6	0.6073	0.74955	1	13745	1	0.14304	0.0024067	0.011891	0.714091	328	3	0.14304
BIN1	6	0.96629	0.96628	1	19536	0	0.50674	0.04266	0.14165	0.880623	3260	4	0.50674
BIN2	6	0.99315	0.99323	1	20422	0	0.43308	0.0068463	0.03173	0.761191	824	6	0.43308
BIN3	6	0.59811	0.7432	1	13606	2	0.11452	0.25742	0.50792	1	10242	3	0.11452
BIRC2	6	0.71293	0.82706	1	15548	2	0.13306	0.47858	0.70762	1	13902	2	0.13306
BIRC3	6	0.35209	0.56749	1	9799	1	0.092125	0.51053	0.73283	1	14354	3	0.092125
BIRC5	6	1.77e-05	0.00010642	0.01107	197	5	-3.6661	0.91367	0.94613	1	18585	1	-3.6661
BIRC6	6	0.99837	0.99837	1	20616	0	0.88	1.52e-06	9.81e-06	0.028996	7	6	0.88
BIRC7	6	0.67943	0.8016	1	14953	1	0.21062	0.40824	0.65181	1	12860	3	0.21062
BIRC8	6	0.95014	0.95018	1	19093	0	0.59194	0.11465	0.29851	0.941839	6451	4	0.59194
BIVM	6	0.21294	0.40964	1	6951	3	-0.10988	0.7914	0.892	1	17379	2	-0.10988
BIVM-ERCC5	3	0.83108	0.83112	1	16784	0	0.49627	0.11351	0.24243	0.910861	6417	2	0.49627
BLCAP	6	0.68307	0.80434	1	15021	2	0.35691	0.039883	0.13414	0.880623	3092	4	0.35691
BLID	6	0.68618	0.80665	1	15075	2	0.50474	0.0076158	0.035046	0.761838	912	3	0.50474
BLK	6	0.27378	0.47995	1	8139	2	0.026892	0.42578	0.66571	1	13104	3	0.026892
BLM	6	0.030017	0.10201	0.7676	2683	4	-0.8605	0.60984	0.80944	1	15772	2	-0.8605
BLMH	6	0.16159	0.34869	1	6013	3	-0.24032	0.40512	0.64931	1	12814	2	-0.24032
BLNK	6	0.20805	0.40392	1	6873	2	0.12405	0.22426	0.46282	1	9460	3	0.12405
BLOC1S1	6	0.84089	0.87388	1	16890	1	0.41146	0.064518	0.19795	0.902688	4456	4	0.41146
BLOC1S2	6	0.17587	0.36585	1	6261	2	0.31135	0.084713	0.24619	0.912931	5464	4	0.31135
BLOC1S3	6	0.42019	0.62785	1	11018	2	-0.0016567	0.69626	0.84645	1	16500	2	-0.0016567
BLOC1S4	6	0.53473	0.70023	1	12631	2	0.21055	0.10779	0.28728	0.937045	6240	3	0.21055
BLOC1S5	6	0.81013	0.86068	1	16520	1	0.39155	0.11555	0.29995	0.942197	6482	4	0.39155
BLOC1S6	6	0.9624	0.96238	1	19429	0	0.56867	0.025779	0.094461	0.841373	2263	5	0.56867
BLVRA	6	0.10341	0.2545	1	4651	4	-0.18147	0.43264	0.67114	1	13209	1	-0.18147
BLVRB	6	0.08619	0.22075	1	4189	4	-0.3314	0.41925	0.66054	1	13008	2	-0.3314
BLZF1	6	0.094383	0.23695	1	4408	4	-0.24225	0.14132	0.34106	0.957267	7261	2	-0.24225
BMF	6	0.45085	0.64672	1	11451	2	0.4153	0.0066261	0.030759	0.761191	802	3	0.4153
BMI1	6	0.58533	0.73432	1	13388	1	0.17134	0.27231	0.52759	1	10627	4	0.17134
BMP1	6	0.14746	0.33146	1	5766	3	-0.11167	0.27192	0.52708	1	10622	1	-0.11167
BMP10	6	0.40907	0.62114	1	10863	2	0.083553	0.077658	0.22959	0.909255	5115	3	0.083553
BMP15	6	0.94053	0.94063	1	18800	0	0.49325	0.01574	0.064371	0.814685	1583	4	0.49325
BMP2	6	0.077034	0.2025	1	3941	4	-0.23501	0.7223	0.85831	1	16717	2	-0.23501
BMP2K	6	0.6967	0.8146	1	15262	2	0.67873	0.0081708	0.037371	0.762898	966	4	0.67873
BMP3	6	0.55202	0.71175	1	12884	1	0.13173	0.031252	0.11019	0.862995	2603	3	0.13173
BMP4	6	0.47781	0.66354	1	11807	1	0.15048	0.32819	0.58703	1	11670	3	0.15048
BMP5	6	0.4437	0.6423	1	11354	2	0.18551	0.30595	0.56854	1	11346	3	0.18551
BMP6	6	0.59583	0.74164	1	13564	2	0.2481	0.16094	0.3713	0.971246	7805	3	0.2481
BMP7	6	0.92654	0.92736	1	18428	1	0.11327	0.32837	0.58718	1	11674	3	0.11327
BMP8A	6	0.082627	0.21367	1	4095	4	-0.51466	0.75415	0.87332	1	16999	1	-0.51466
BMP8B	5	0.51328	0.66256	1	12296	1	0.27134	0.055261	0.16041	0.888815	3977	3	0.27134
BMPER	6	0.97351	0.97357	1	19761	0	0.53168	0.037911	0.12872	0.880623	2969	5	0.53168
BMPR1A	6	0.036099	0.11583	0.820561	2859	2	0.3172	0.17586	0.39361	0.975177	8230	4	0.3172
BMPR1B	6	0.4457	0.64351	1	11374	2	0.06063	0.48181	0.71011	1	13946	3	0.06063
BMPR2	6	0.8143	0.86237	1	16560	1	0.031227	0.76651	0.87938	1	17115	2	0.031227
BMS1	6	0.00051545	0.0027151	0.082168	682	6	-0.85796	0.99948	0.99949	1	20472	0	-0.85796
BMX	6	0.99313	0.99321	1	20420	0	0.33902	0.0068651	0.031814	0.761191	827	6	0.33902
BNC1	6	0.23142	0.43108	1	7303	2	0.043596	0.91052	0.9452	1	18556	1	0.043596
BNC2	6	0.91909	0.92102	1	18252	1	0.21456	0.23276	0.47449	1	9644	4	0.21456
BNIP1	6	4.2e-05	0.00023724	0.017188	285	4	-1.4283	0.35495	0.60881	1	12049	2	-1.4283
BNIP2	6	0.09896	0.24596	1	4539	4	-0.19741	0.70781	0.85173	1	16595	2	-0.19741
BNIP3	6	0.8214	0.86533	1	16659	1	0.24694	0.17353	0.39016	0.975177	8152	4	0.24694
BNIP3L	6	0.6373	0.77078	1	14236	2	-0.10193	0.34632	0.60174	1	11923	2	-0.10193
BNIPL	6	0.50973	0.68387	1	12247	2	-0.067414	0.71401	0.85451	1	16656	2	-0.067414
BOC	6	0.06854	0.18523	1	3705	4	-0.30254	0.98332	0.9835	1	19698	0	-0.30254
BOD1	6	0.94709	0.94713	1	18988	0	0.43643	0.13412	0.32971	0.954471	7042	4	0.43643
BOD1L1	6	0.0058226	0.024586	0.340129	1478	4	-0.61364	0.97338	0.9741	1	19408	1	-0.61364
BOD1L2	6	0.93682	0.93694	1	18702	1	0.68073	0.0065486	0.030434	0.761191	791	4	0.68073
BOK	6	0.30754	0.5181	1	8810	2	-0.013103	0.20073	0.42976	0.991205	8850	3	-0.013103
BOLA1	6	0.48201	0.66613	1	11865	2	0.18001	0.29691	0.55937	1	11184	3	0.18001
BOLA2	6	0.00011128	0.00061104	0.03105	407	6	-1.4034	0.99984	0.99984	1	20537	0	-1.4034
BOLA3	6	0.8845	0.89683	1	17571	1	0.65376	0.0076629	0.035247	0.761838	916	5	0.65376
BOLL	6	0.22887	0.42817	1	7245	2	0.3729	0.058718	0.18352	0.895015	4175	3	0.3729
BOP1	6	0.024661	0.086828	0.714463	2455	4	-0.61211	0.96792	0.96998	1	19298	1	-0.61211
BORA	6	0.010755	0.041867	0.473573	1800	4	-0.46549	0.88122	0.93752	1	18352	1	-0.46549
BPGM	6	0.84164	0.87423	1	16902	1	0.29568	0.050204	0.16157	0.88899	3710	4	0.29568
BPHL	6	0.30143	0.5112	1	8697	3	-0.14474	0.95747	0.96357	1	19107	1	-0.14474
BPI	6	0.59464	0.7408	1	13547	2	0.22798	0.27027	0.52495	1	10588	4	0.22798
BPIFA1	6	0.17903	0.3696	1	6321	2	0.3526	0.13336	0.32852	0.954428	7010	4	0.3526
BPIFA2	6	0.86425	0.88545	1	17228	1	0.49566	0.0023698	0.011722	0.710634	326	5	0.49566
BPIFA3	6	0.075934	0.20029	1	3911	4	-0.38462	0.80893	0.90121	1	17557	2	-0.38462
BPIFB1	6	0.27822	0.48504	1	8228	2	0.067821	0.20079	0.42984	0.991253	8852	3	0.067821
BPIFB2	6	0.77713	0.84846	1	16173	1	0.50295	0.02627	0.095907	0.842649	2299	5	0.50295
BPIFB3	6	0.94305	0.94314	1	18877	0	0.13717	0.15605	0.36388	0.969183	7655	3	0.13717
BPIFB4	6	0.67595	0.79905	1	14900	2	0.24654	0.13334	0.32848	0.954428	7009	4	0.24654
BPIFB6	6	0.32672	0.53961	1	9228	3	-0.18644	0.13596	0.33264	0.955167	7097	1	-0.18644
BPIFC	6	0.54956	0.71011	1	12849	2	-0.023548	0.49755	0.72255	1	14172	2	-0.023548
BPNT1	6	0.66089	0.78784	1	14644	1	0.57853	0.050943	0.16354	0.890245	3746	4	0.57853
BPTF	6	0.12338	0.2921	1	5203	3	-0.21842	0.51452	0.73598	1	14394	3	-0.21842
BPY2	6	0.93664	0.93675	1	18697	1	0.38398	0.038023	0.12903	0.880623	2981	5	0.38398
BPY2C	2	0.23968	0.29756	1	7457	1	-0.34024	0.61264	0.62234	1	15815	1	-0.34024
BRAF	6	0.86347	0.88505	1	17220	1	0.21006	0.25637	0.5065	1	10219	4	0.21006
BRAP	6	0.0043386	0.019192	0.286013	1371	4	-0.45474	0.80773	0.90059	1	17542	1	-0.45474
BRAT1	6	0.036437	0.11657	0.824697	2865	3	-0.03666	0.37133	0.62204	1	12319	3	-0.03666
BRCA1	6	0.00032409	0.0017394	0.062185	578	6	-1.1763	0.99958	0.99957	1	20483	0	-1.1763
BRCA2	6	0.10513	0.2578	1	4703	1	0.26641	0.058123	0.18201	0.893537	4147	3	0.26641
BRCC3	6	0.94325	0.94334	1	18885	0	0.39387	0.20826	0.44039	0.993744	9050	4	0.39387
BRD1	6	0.39643	0.61355	1	10711	2	0.028322	0.1673	0.38088	0.974326	7988	2	0.028322
BRD2	6	0.91801	0.92013	1	18229	1	0.2486	0.21821	0.45436	0.999314	9304	4	0.2486
BRD3	6	0.44706	0.64435	1	11401	2	0.46588	0.047977	0.15577	0.887526	3584	4	0.46588
BRD4	6	0.12653	0.29797	1	5280	3	-0.07687	0.49242	0.71844	1	14112	2	-0.07687
BRD7	6	0.19443	0.3879	1	6610	3	-0.10534	0.27405	0.52986	1	10673	3	-0.10534
BRD8	6	0.0072248	0.029651	0.385296	1573	4	-0.63683	0.81894	0.90659	1	17661	2	-0.63683
BRD9	6	0.0009448	0.0049244	0.119783	843	4	-0.71916	0.5175	0.73833	1	14439	1	-0.71916
BRDT	6	0.98587	0.986	1	20165	0	0.29968	0.062249	0.19235	0.898772	4356	5	0.29968
BRE	6	0.9979	0.99791	1	20595	0	0.64982	0.0021049	0.010488	0.709458	293	6	0.64982
BRF1	6	1e-07	1.67e-06	0.001195	26	6	-1.9779	1	1	1	20684	0	-1.9779
BRF2	6	0.023053	0.081815	0.691818	2391	5	-0.43146	0.92988	0.95145	1	18743	1	-0.43146
BRI3	6	0.37465	0.59206	1	10301	3	-0.11734	0.5215	0.74137	1	14510	2	-0.11734
BRI3BP	6	0.14525	0.32876	1	5724	3	0.022771	0.18964	0.41372	0.98414	8572	3	0.022771
BRICD5	6	0.7894	0.85285	1	16277	1	0.53063	0.016268	0.065946	0.816005	1622	4	0.53063
BRINP1	6	0.57815	0.72936	1	13275	2	-0.023622	0.25537	0.50515	1	10199	2	-0.023622
BRINP2	6	0.056665	0.16062	0.961262	3373	4	-0.38228	0.1077	0.28714	0.937045	6237	2	-0.38228
BRINP3	6	0.92219	0.92356	1	18323	1	0.41622	0.054594	0.17302	0.892969	3948	4	0.41622
BRIP1	6	4.8e-06	3.37e-05	0.006288	111	4	-2.0222	0.97498	0.97547	1	19451	1	-2.0222
BRIX1	6	0.022445	0.079875	0.683228	2364	5	-0.64458	0.96752	0.9697	1	19284	1	-0.64458
BRK1	6	0.70081	0.81781	1	15336	2	0.071746	0.60018	0.80216	1	15660	2	0.071746
BRMS1	6	0.053935	0.15475	0.944929	3311	3	-0.26022	0.3233	0.58299	1	11603	2	-0.26022
BRMS1L	6	0.096282	0.24076	1	4446	3	0.0086389	0.35967	0.6126	1	12132	3	0.0086389
BROX	6	0.37919	0.59705	1	10403	2	0.064845	0.11585	0.30043	0.94227	6493	2	0.064845
BRPF1	6	0.0033488	0.015539	0.248577	1280	5	-1.1731	0.98422	0.98437	1	19727	0	-1.1731
BRPF3	6	0.86021	0.88336	1	17165	1	0.15302	0.41739	0.65905	1	12978	2	0.15302
BRS3	6	0.61541	0.75531	1	13860	1	0.18702	0.14131	0.34105	0.957267	7260	3	0.18702
BRSK1	6	0.26475	0.46969	1	7959	3	-0.19433	0.97254	0.9734	1	19389	1	-0.19433
BRSK2	6	0.76123	0.84308	1	15989	1	0.83031	0.0028723	0.014071	0.720971	389	5	0.83031
BRWD1	6	0.61882	0.75779	1	13936	1	0.46638	0.12571	0.31633	0.952437	6768	4	0.46638
BRWD3	6	0.32653	0.53936	1	9223	3	-0.19242	0.46585	0.69756	1	13740	2	-0.19242
BSCL2	6	0.90902	0.91324	1	18030	1	0.21125	0.25057	0.49863	1	10071	4	0.21125
BSDC1	6	0.3519	0.5673	1	9794	3	-0.050736	0.58362	0.78941	1	15420	3	-0.050736
BSG	6	0.12133	0.28827	1	5150	3	-0.15688	0.26189	0.51395	1	10372	3	-0.15688
BSN	6	0.56336	0.7193	1	13043	2	-0.028161	0.82081	0.90763	1	17683	2	-0.028161
BSND	6	0.58121	0.73149	1	13327	1	0.35522	0.088103	0.254	0.916169	5622	4	0.35522
BSPH1	5	0.58417	0.72259	1	13373	2	0.18188	0.26844	0.48791	1	10543	3	0.18188
BSPRY	6	0.33328	0.54683	1	9383	1	0.49031	0.011036	0.049065	0.787662	1238	5	0.49031
BST1	6	0.47082	0.65915	1	11716	2	0.078919	0.15548	0.36298	0.969183	7635	2	0.078919
BST2	6	0.17628	0.36633	1	6266	3	-0.21927	0.65844	0.82996	1	16203	1	-0.21927
BSX	6	0.80439	0.85842	1	16456	1	0.21622	0.040836	0.13675	0.880623	3144	3	0.21622
BTAF1	6	0.006347	0.026484	0.356214	1517	5	-0.94173	0.96712	0.96943	1	19273	1	-0.94173
BTBD1	6	0.51045	0.68434	1	12257	1	0.26464	0.20945	0.44208	0.993825	9082	4	0.26464
BTBD10	6	0.90297	0.90888	1	17907	1	0.35998	0.046419	0.15168	0.886571	3488	5	0.35998
BTBD11	6	0.93167	0.93198	1	18566	1	0.18423	0.29649	0.55883	1	11175	4	0.18423
BTBD16	6	0.83106	0.86944	1	16782	1	0.1842	0.20069	0.42971	0.991205	8848	4	0.1842
BTBD17	6	0.1802	0.37099	1	6344	2	-0.0047087	0.86325	0.93208	1	18209	2	-0.0047087
BTBD18	6	0.34858	0.56366	1	9723	2	0.21594	0.52567	0.74462	1	14565	2	0.21594
BTBD2	6	0.64842	0.77883	1	14437	2	0.099135	0.7784	0.88538	1	17247	2	0.099135
BTBD3	6	0.78997	0.85304	1	16286	1	0.027654	0.12373	0.31315	0.949971	6709	2	0.027654
BTBD6	6	0.87414	0.89081	1	17401	1	0.26025	0.10132	0.27665	0.933824	6035	4	0.26025
BTBD7	6	0.21383	0.41068	1	6962	3	0.010057	0.51217	0.7341	1	14370	3	0.010057
BTBD8	6	0.84845	0.87746	1	16987	1	0.067136	0.077472	0.22917	0.909255	5108	2	0.067136
BTBD9	6	0.10981	0.26669	1	4834	3	-0.12112	0.84617	0.92196	1	17996	1	-0.12112
BTC	6	0.96498	0.96496	1	19496	0	0.52637	0.049338	0.1593	0.888815	3652	4	0.52637
BTD	6	0.57275	0.72571	1	13204	1	0.23466	0.1411	0.34072	0.957267	7255	3	0.23466
BTF3	6	0.012976	0.049322	0.521961	1925	5	-1.0669	0.89583	0.94116	1	18439	1	-1.0669
BTF3L4	6	0.24466	0.44637	1	7557	2	-0.027833	0.98685	0.98693	1	19810	0	-0.027833
BTG1	6	0.3271	0.54001	1	9238	2	0.36355	0.083817	0.24408	0.911337	5425	4	0.36355
BTG2	6	0.99102	0.99109	1	20347	0	0.60174	0.0089845	0.040708	0.772754	1042	6	0.60174
BTG3	6	0.74169	0.8368	1	15788	1	0.35878	0.14031	0.3395	0.957267	7227	3	0.35878
BTG4	6	0.63962	0.77246	1	14282	2	0.1396	0.18827	0.41173	0.983133	8543	3	0.1396
BTK	6	0.16253	0.34984	1	6027	2	0.20143	0.3139	0.57518	1	11448	3	0.20143
BTLA	6	0.71222	0.82652	1	15537	2	-0.011934	0.35849	0.61165	1	12110	2	-0.011934
BTN1A1	6	0.31414	0.52553	1	8958	3	0.18566	0.080811	0.23702	0.910182	5269	3	0.18566
BTN2A1	6	0.46823	0.65751	1	11679	2	0.38988	0.10021	0.27486	0.932557	5999	4	0.38988
BTN2A2	6	0.76356	0.84382	1	16015	1	0.16886	0.25246	0.50126	1	10120	3	0.16886
BTN3A1	6	0.020366	0.073348	0.654159	2278	4	-0.65263	0.96801	0.97003	1	19299	1	-0.65263
BTN3A2	6	0.14468	0.32806	1	5716	2	0.017832	0.49738	0.72242	1	14168	2	0.017832
BTN3A3	6	0.18925	0.38177	1	6518	3	-0.13977	0.61099	0.81036	1	15795	3	-0.13977
BTNL3	6	0.87542	0.89153	1	17424	1	0.25248	0.13173	0.32594	0.954171	6951	3	0.25248
BTNL8	6	0.084081	0.21653	1	4135	4	-0.42405	0.83461	0.91541	1	17871	2	-0.42405
BTNL9	6	0.23027	0.42977	1	7281	1	0.47697	0.049017	0.15848	0.888767	3642	4	0.47697
BTRC	6	0.02295	0.081498	0.690539	2386	1	0.078212	0.18024	0.40004	0.977578	8339	3	0.078212
BUB1	6	0.003061	0.014486	0.235001	1258	4	-0.89782	0.60257	0.804	1	15690	2	-0.89782
BUB1B	6	1.36e-05	8.75e-05	0.010625	170	6	-0.83845	0.99999	0.99999	1	20624	0	-0.83845
BUB3	6	0.00011419	0.00062395	0.031449	410	5	-1.4511	0.35939	0.61238	1	12127	1	-1.4511
BUD13	6	0.16386	0.35147	1	6047	3	-0.15911	0.25107	0.4993	1	10085	3	-0.15911
BUD31	6	0.0075973	0.03097	0.393137	1606	5	-1.5032	0.97955	0.97971	1	19578	0	-1.5032
BVES	6	0.98826	0.98837	1	20253	0	0.88566	0.013296	0.056751	0.805138	1406	5	0.88566
BYSL	6	0.13235	0.30872	1	5430	4	-0.28969	0.67308	0.83628	1	16325	2	-0.28969
BZRAP1	6	0.80764	0.85971	1	16490	1	0.457	0.016545	0.06683	0.816005	1645	4	0.457
BZW1	6	0.012937	0.049181	0.521873	1920	4	-0.59168	0.83237	0.91414	1	17834	1	-0.59168
BZW2	6	0.9925	0.99257	1	20393	0	0.33792	0.0074991	0.034539	0.761838	902	6	0.33792
C10orf10	6	0.86003	0.88326	1	17162	1	0.45221	0.022313	0.084257	0.830034	2025	5	0.45221
C10orf105	6	0.70036	0.81747	1	15324	2	0.16244	0.35113	0.60575	1	11993	3	0.16244
C10orf107	6	0.16838	0.3569	1	6124	1	0.31497	0.035067	0.12084	0.87693	2807	4	0.31497
C10orf11	6	0.65632	0.78447	1	14573	1	0.42704	0.059983	0.18666	0.896625	4239	4	0.42704
C10orf111	6	0.17009	0.35895	1	6153	3	-0.070246	0.7919	0.89225	1	17390	2	-0.070246
C10orf113	6	0.96152	0.96149	1	19407	0	0.42632	0.028371	0.10201	0.857731	2406	5	0.42632
C10orf114	6	0.10748	0.26223	1	4767	3	-0.2338	0.69236	0.84475	1	16474	1	-0.2338
C10orf118	6	0.52634	0.69467	1	12503	1	0.15101	0.42946	0.66864	1	13157	3	0.15101
C10orf12	6	0.51402	0.68665	1	12316	2	0.0011631	0.10892	0.28913	0.937211	6283	2	0.0011631
C10orf120	6	0.93898	0.93911	1	18754	0	0.039198	0.084998	0.24684	0.91298	5476	3	0.039198
C10orf128	6	0.31385	0.52519	1	8952	3	0.00080369	0.27712	0.53389	1	10755	3	0.00080369
C10orf129	6	0.68767	0.80776	1	15104	2	0.27233	0.13632	0.3332	0.955167	7110	4	0.27233
C10orf131	5	0.53148	0.67777	1	12579	2	0.089929	0.030037	0.10248	0.857809	2513	2	0.089929
C10orf137	6	0.47756	0.66339	1	11804	2	-0.039888	0.40532	0.64945	1	12816	2	-0.039888
C10orf2	6	0.00024667	0.0013299	0.050636	541	4	-1.4197	0.24095	0.4857	1	9858	2	-1.4197
C10orf25	6	0.13387	0.31151	1	5465	4	-0.18304	0.97194	0.97294	1	19375	1	-0.18304
C10orf32	6	0.70709	0.82261	1	15443	2	0.12636	0.54194	0.75719	1	14802	3	0.12636
C10orf35	6	0.28693	0.49486	1	8394	3	-0.16819	0.64242	0.82322	1	16065	2	-0.16819
C10orf53	6	0.2292	0.42854	1	7256	3	-0.0012102	0.17784	0.39653	0.975569	8281	3	-0.0012102
C10orf54	6	0.57456	0.72695	1	13225	2	0.20306	0.37598	0.62583	1	12407	3	0.20306
C10orf55	6	0.97686	0.977	1	19855	0	0.36755	0.071623	0.21517	0.906211	4827	5	0.36755
C10orf62	6	0.92297	0.92424	1	18340	1	0.35194	0.079343	0.23359	0.910182	5198	3	0.35194
C10orf67	6	0.99122	0.99129	1	20354	0	0.34675	0.0087751	0.039838	0.771367	1024	6	0.34675
C10orf68	6	0.56732	0.72202	1	13118	2	0.00090221	0.68507	0.84152	1	16414	1	0.00090221
C10orf71	6	0.022245	0.07925	0.679569	2358	5	-0.88623	0.77443	0.88337	1	17195	1	-0.88623
C10orf76	6	7.55e-05	0.00039676	0.02332	351	5	-1.6837	0.083124	0.2425	0.910861	5392	1	-1.6837
C10orf82	6	0.3257	0.53842	1	9203	3	-0.12312	0.48212	0.71037	1	13953	2	-0.12312
C10orf88	6	0.034275	0.11172	0.806339	2805	3	-0.28227	0.16446	0.37662	0.972609	7900	1	-0.28227
C10orf90	6	0.54967	0.71019	1	12852	2	0.063071	0.43418	0.67238	1	13230	2	0.063071
C10orf91	6	0.99029	0.99038	1	20327	0	0.30398	0.0097053	0.043695	0.777096	1114	6	0.30398
C10orf95	6	0.84492	0.87578	1	16943	1	0.45815	0.037967	0.12887	0.880623	2975	5	0.45815
C10orf99	6	0.20866	0.40464	1	6881	3	-0.1506	0.37233	0.62282	1	12340	2	-0.1506
C11orf1	6	0.069596	0.18737	1	3737	2	0.41824	0.057934	0.18156	0.893537	4135	4	0.41824
C11orf16	6	0.92957	0.93006	1	18516	1	0.39563	0.052479	0.16758	0.8915	3835	5	0.39563
C11orf21	6	0.81995	0.86473	1	16644	1	0.55271	0.054453	0.17265	0.892969	3944	4	0.55271
C11orf24	6	0.8372	0.87222	1	16850	1	0.37259	0.14346	0.34443	0.958933	7329	4	0.37259
C11orf30	6	0.032723	0.10818	0.79399	2757	4	-0.518	0.83761	0.9171	1	17904	2	-0.518
C11orf31	6	0.46182	0.65349	1	11586	2	0.065607	0.79919	0.89609	1	17461	2	0.065607
C11orf35	6	0.17749	0.36777	1	6287	3	-0.045277	0.59176	0.79572	1	15544	2	-0.045277
C11orf40	6	0.32957	0.54274	1	9301	3	0.030525	0.46068	0.69347	1	13656	3	0.030525
C11orf42	6	0.11549	0.27738	1	4987	1	0.48929	0.011795	0.052006	0.791566	1313	5	0.48929
C11orf45	6	0.20982	0.40598	1	6898	3	-0.025729	0.38795	0.63559	1	12572	3	-0.025729
C11orf48	6	0.1536	0.33901	1	5866	3	-0.4247	0.66701	0.83366	1	16270	2	-0.4247
C11orf49	6	0.35843	0.57439	1	9931	1	0.60042	0.0062911	0.029297	0.761191	760	5	0.60042
C11orf52	6	0.99531	0.99537	1	20502	0	0.37403	0.0046911	0.022291	0.761191	576	6	0.37403
C11orf53	6	0.60788	0.75	1	13753	2	-0.12183	0.70179	0.849	1	16543	2	-0.12183
C11orf54	6	0.99665	0.99671	1	20548	0	0.72961	0.0033487	0.016251	0.741408	440	6	0.72961
C11orf57	6	0.87027	0.88865	1	17341	1	0.26853	0.14884	0.35272	0.963792	7465	4	0.26853
C11orf58	6	0.09819	0.24442	1	4518	4	-0.33063	0.65546	0.82868	1	16175	2	-0.33063
C11orf63	6	0.5037	0.67997	1	12167	2	-0.21756	0.9241	0.94945	1	18691	1	-0.21756
C11orf65	6	0.95006	0.9501	1	19089	0	0.29463	0.085743	0.24856	0.91298	5512	5	0.29463
C11orf68	6	0.29303	0.50175	1	8526	3	-0.1267	0.52319	0.74268	1	14533	2	-0.1267
C11orf70	6	0.6733	0.79709	1	14848	2	-0.030417	0.76521	0.87875	1	17101	2	-0.030417
C11orf71	6	0.36876	0.58569	1	10176	3	-0.14104	0.91797	0.94746	1	18634	1	-0.14104
C11orf73	6	0.010839	0.042138	0.474997	1806	5	-0.62451	0.88819	0.9392	1	18391	1	-0.62451
C11orf74	6	0.88604	0.89775	1	17603	1	0.23105	0.24625	0.49281	1	9973	3	0.23105
C11orf80	6	0.70089	0.81786	1	15337	1	0.19089	0.26179	0.51381	1	10369	3	0.19089
C11orf82	6	0.77437	0.84753	1	16140	1	0.33316	0.12268	0.31146	0.948664	6684	4	0.33316
C11orf83	6	0.059632	0.16682	0.974347	3455	3	-0.16016	0.21253	0.44641	0.995755	9164	1	-0.16016
C11orf84	6	0.69305	0.81185	1	15194	2	0.45401	0.038519	0.1304	0.880623	3005	4	0.45401
C11orf85	6	0.97041	0.97041	1	19659	0	0.4762	0.022593	0.085094	0.830034	2054	5	0.4762
C11orf86	6	0.080388	0.20912	1	4029	4	-0.21834	0.46605	0.69771	1	13745	1	-0.21834
C11orf87	6	0.27821	0.48502	1	8227	2	0.21643	0.12981	0.3229	0.954023	6883	4	0.21643
C11orf88	6	0.79591	0.85522	1	16361	1	0.18009	0.31828	0.57885	1	11519	3	0.18009
C11orf91	6	0.37141	0.58853	1	10232	3	0.064894	0.40163	0.64657	1	12766	3	0.064894
C11orf93	6	0.051256	0.14905	0.929338	3246	3	-0.43167	0.21229	0.44608	0.99536	9160	2	-0.43167
C11orf94	6	0.46428	0.65506	1	11629	2	0.030055	0.27294	0.52842	1	10648	3	0.030055
C11orf96	6	0.67633	0.79932	1	14908	2	-0.023611	0.046592	0.15211	0.886571	3497	2	-0.023611
C12orf10	6	0.68831	0.80825	1	15117	2	0.058899	0.57431	0.78217	1	15276	3	0.058899
C12orf23	6	0.29476	0.5037	1	8566	3	0.0027918	0.36908	0.62026	1	12279	3	0.0027918
C12orf29	6	0.49142	0.67212	1	11985	2	0.035111	0.61103	0.8104	1	15797	3	0.035111
C12orf39	6	0.30955	0.52038	1	8859	2	0.077308	0.53869	0.75467	1	14751	2	0.077308
C12orf4	6	0.066913	0.18189	1	3650	4	-0.41092	0.88563	0.93857	1	18382	1	-0.41092
C12orf40	6	0.42723	0.63209	1	11130	2	0.022218	0.77209	0.88223	1	17172	1	0.022218
C12orf42	6	0.98716	0.98724	1	20211	0	0.37762	0.069346	0.20966	0.905539	4713	5	0.37762
C12orf43	6	0.83024	0.86909	1	16764	1	0.60096	0.037809	0.12844	0.880623	2960	5	0.60096
C12orf44	6	0.956	0.956	1	19252	0	0.3341	0.014344	0.060039	0.808526	1486	4	0.3341
C12orf45	6	0.0068103	0.028177	0.370796	1553	4	-0.61618	0.67017	0.83503	1	16301	2	-0.61618
C12orf49	6	0.45715	0.65059	1	11531	2	0.17431	0.17485	0.39211	0.975177	8200	3	0.17431
C12orf5	6	0.43329	0.63582	1	11221	2	0.20644	0.044539	0.14668	0.88275	3388	3	0.20644
C12orf50	6	0.44733	0.64452	1	11406	2	-0.084821	0.10436	0.28169	0.935096	6131	2	-0.084821
C12orf52	6	0.95169	0.95176	1	19139	0	0.37427	0.11564	0.3001	0.942197	6486	4	0.37427
C12orf54	4	0.64007	0.69739	1	14297	1	0.17652	0.26558	0.47291	1	10476	2	0.17652
C12orf56	6	0.31188	0.52303	1	8916	2	0.14112	0.56915	0.7782	1	15208	3	0.14112
C12orf57	6	0.30215	0.51201	1	8706	2	0.19632	0.27516	0.53132	1	10703	3	0.19632
C12orf60	6	0.23717	0.4377	1	7415	3	-0.099986	0.065659	0.20076	0.90297	4521	2	-0.099986
C12orf61	6	0.49987	0.67754	1	12111	1	0.52934	0.039883	0.13414	0.880623	3093	5	0.52934
C12orf65	6	0.50517	0.68093	1	12185	1	0.14878	0.413	0.65558	1	12918	3	0.14878
C12orf66	6	0.34154	0.55589	1	9576	3	-0.11103	0.591	0.79515	1	15536	2	-0.11103
C12orf68	6	0.3451	0.55982	1	9646	2	0.12274	0.1305	0.324	0.954023	6911	3	0.12274
C12orf71	6	0.61482	0.7549	1	13852	2	0.16617	0.28539	0.54461	1	10935	3	0.16617
C12orf73	6	0.7357	0.83498	1	15740	1	-0.021153	0.024362	0.090346	0.832125	2189	2	-0.021153
C12orf74	6	0.065535	0.17907	1	3610	4	-0.54373	0.091914	0.26084	0.92106	5749	2	-0.54373
C12orf75	6	0.15608	0.34201	1	5910	3	-0.063707	0.51207	0.73403	1	14368	3	-0.063707
C12orf76	6	0.25295	0.45603	1	7713	1	0.25776	0.0332	0.11568	0.870167	2706	5	0.25776
C12orf77	6	0.94285	0.94295	1	18873	0	0.36867	0.0097212	0.04377	0.777096	1117	3	0.36867
C12orf79	6	0.17555	0.36546	1	6250	3	-0.23082	0.98092	0.98109	1	19622	0	-0.23082
C13orf35	6	0.83909	0.87307	1	16875	1	0.20567	0.45094	0.68577	1	13514	3	0.20567
C13orf45	6	0.21244	0.40905	1	6939	3	0.11101	0.078617	0.23187	0.909353	5160	3	0.11101
C14orf1	6	0.037586	0.11913	0.834271	2892	4	-0.3697	0.52337	0.74283	1	14536	2	-0.3697
C14orf105	6	0.34756	0.56255	1	9704	3	-0.075681	0.58127	0.78761	1	15392	2	-0.075681
C14orf119	6	0.94682	0.94686	1	18980	0	-0.0070185	0.19204	0.41721	0.985936	8624	2	-0.0070185
C14orf132	6	0.28825	0.49634	1	8423	2	0.0010118	0.35051	0.60523	1	11982	2	0.0010118
C14orf142	6	0.32447	0.53709	1	9175	3	-0.12065	0.64222	0.82314	1	16062	2	-0.12065
C14orf159	6	0.66466	0.7906	1	14699	2	-0.11924	0.82997	0.91275	1	17799	1	-0.11924
C14orf166	6	0.0010757	0.005551	0.127478	892	5	-1.349	0.72176	0.85806	1	16714	1	-1.349
C14orf166B	6	0.86219	0.88439	1	17198	1	0.27156	0.23573	0.47852	1	9711	4	0.27156
C14orf169	6	0.97422	0.9743	1	19782	0	0.94961	0.001008	0.005221	0.666009	151	4	0.94961
C14orf177	6	0.99176	0.99183	1	20369	0	0.41332	0.0082393	0.037652	0.763519	972	6	0.41332
C14orf178	6	0.69373	0.81236	1	15210	2	0.092152	0.52937	0.74751	1	14618	3	0.092152
C14orf180	6	0.9062	0.91119	1	17971	1	0.59157	0.023886	0.088951	0.830034	2162	5	0.59157
C14orf182	6	0.84975	0.8781	1	17003	1	0.13613	0.54939	0.76294	1	14928	3	0.13613
C14orf183	6	0.91117	0.91482	1	18073	1	0.35787	0.1096	0.29027	0.938074	6299	4	0.35787
C14orf2	6	0.28632	0.49419	1	8380	3	-0.032097	0.44862	0.6839	1	13478	3	-0.032097
C14orf28	6	0.10156	0.25092	1	4602	4	-0.25692	0.81359	0.90373	1	17602	2	-0.25692
C14orf37	6	0.29825	0.5076	1	8639	3	0.038078	0.34997	0.60478	1	11974	3	0.038078
C14orf39	6	0.99202	0.99211	1	20379	0	0.39081	0.0079796	0.036577	0.762898	943	6	0.39081
C14orf79	6	0.23031	0.42983	1	7282	2	0.35644	0.27235	0.52763	1	10629	4	0.35644
C14orf80	6	0.003331	0.015472	0.247858	1278	4	-0.71551	0.97512	0.97559	1	19454	1	-0.71551
C14orf93	6	0.1316	0.30733	1	5401	2	0.2018	0.18767	0.4109	0.982382	8529	3	0.2018
C15orf26	6	0.94088	0.94099	1	18811	0	0.34565	0.12603	0.31685	0.952839	6773	4	0.34565
C15orf27	6	0.55425	0.71323	1	12914	2	0.45126	0.069603	0.21027	0.905858	4727	4	0.45126
C15orf32	6	0.53852	0.70276	1	12690	2	0.079674	0.49505	0.72054	1	14137	3	0.079674
C15orf38	6	0.99481	0.99485	1	20481	0	0.41265	0.0051854	0.024449	0.761191	635	6	0.41265
C15orf38-AP3S2	4	0.67824	0.71892	1	14933	1	0.32886	0.13358	0.28319	0.935826	7021	2	0.32886
C15orf39	6	0.98864	0.98874	1	20272	0	0.58775	0.011361	0.050377	0.790005	1275	6	0.58775
C15orf40	6	0.31975	0.53186	1	9075	3	-0.058883	0.546	0.76033	1	14866	2	-0.058883
C15orf41	6	1.17e-05	7.82e-05	0.010055	161	6	-1.5167	0.99928	0.99928	1	20446	0	-1.5167
C15orf43	6	0.51442	0.6869	1	12325	2	0.055135	0.47536	0.70507	1	13857	3	0.055135
C15orf48	6	0.30131	0.51107	1	8692	3	-0.13811	0.23608	0.47902	1	9724	1	-0.13811
C15orf52	6	0.17651	0.3666	1	6273	3	-0.074874	0.33357	0.59138	1	11747	2	-0.074874
C15orf53	6	0.87283	0.89005	1	17382	1	0.099294	0.42089	0.66186	1	13037	2	0.099294
C15orf54	6	0.374	0.59136	1	10284	3	-0.14801	0.31747	0.57817	1	11506	2	-0.14801
C15orf56	6	0.90169	0.90797	1	17887	1	0.27611	0.1528	0.35888	0.967498	7569	4	0.27611
C15orf57	6	0.018655	0.067868	0.626622	2206	3	-0.36589	0.23019	0.47104	1	9589	2	-0.36589
C15orf59	6	0.96969	0.96971	1	19641	0	0.37426	0.14111	0.34074	0.957267	7256	4	0.37426
C15orf60	6	0.038675	0.12156	0.842129	2931	2	-0.071641	0.65576	0.82882	1	16181	2	-0.071641
C15orf61	6	0.17399	0.36364	1	6223	3	-0.21258	0.24803	0.49517	1	10023	2	-0.21258
C15orf62	6	0.92028	0.92201	1	18279	1	0.33029	0.040644	0.13623	0.880623	3133	5	0.33029
C15orf65	6	0.99412	0.99417	1	20462	0	0.46399	0.0058821	0.027502	0.761191	711	6	0.46399
C16orf11	6	0.71566	0.82916	1	15600	2	0.32744	0.26185	0.5139	1	10371	4	0.32744
C16orf13	6	0.99683	0.99689	1	20554	0	1.0301	3.16e-05	0.00018487	0.141731	26	6	1.0301
C16orf3	6	0.31797	0.52985	1	9032	2	-0.052872	0.96567	0.96847	1	19245	1	-0.052872
C16orf45	6	0.38604	0.60449	1	10531	3	0.060398	0.51024	0.7326	1	14347	3	0.060398
C16orf46	6	0.37363	0.59092	1	10275	2	-0.0048807	0.55636	0.76834	1	15032	2	-0.0048807
C16orf52	6	0.64	0.77274	1	14294	2	0.47445	0.063905	0.19646	0.902503	4430	4	0.47445
C16orf54	6	0.72637	0.8322	1	15673	1	0.47267	0.03361	0.11682	0.870167	2733	4	0.47267
C16orf55	6	0.67247	0.79647	1	14836	2	0.10898	0.56886	0.77796	1	15206	3	0.10898
C16orf58	6	0.29281	0.50152	1	8515	3	-0.02259	0.75422	0.87335	1	17000	2	-0.02259
C16orf59	6	0.26497	0.46995	1	7965	3	-0.12818	0.49598	0.72128	1	14148	2	-0.12818
C16orf62	6	0.67389	0.79751	1	14863	1	0.17969	0.26895	0.52327	1	10556	4	0.17969
C16orf70	6	0.67528	0.79855	1	14890	2	0.090891	0.17792	0.39665	0.975612	8286	3	0.090891
C16orf71	6	0.61559	0.75544	1	13862	1	0.55883	0.023405	0.087539	0.830034	2120	5	0.55883
C16orf72	6	0.097248	0.24263	1	4485	4	-0.26635	0.97626	0.97657	1	19485	1	-0.26635
C16orf74	6	0.32783	0.54084	1	9259	2	0.55459	0.049875	0.16071	0.888815	3689	4	0.55459
C16orf78	6	0.37924	0.59711	1	10405	3	0.18246	0.10995	0.29085	0.938217	6311	3	0.18246
C16orf80	6	0.00042515	0.0022588	0.072473	640	3	-0.57907	0.97467	0.97519	1	19439	1	-0.57907
C16orf86	6	0.34368	0.55824	1	9612	2	0.26459	0.14478	0.3465	0.960611	7357	3	0.26459
C16orf87	6	0.87619	0.89196	1	17435	1	0.11784	0.42105	0.66199	1	13038	3	0.11784
C16orf89	6	0.034923	0.11317	0.812769	2818	2	0.055198	0.63843	0.82156	1	16037	2	0.055198
C16orf90	6	0.68018	0.80217	1	14960	1	-0.0057743	0.94385	0.95701	1	18914	1	-0.0057743
C16orf92	6	0.21308	0.40979	1	6954	2	0.28176	0.28946	0.54987	1	11036	3	0.28176
C16orf93	6	0.50343	0.6798	1	12163	1	0.16949	0.15284	0.35896	0.967498	7572	4	0.16949
C16orf95	6	0.071957	0.19223	1	3809	4	-0.21404	0.81028	0.90196	1	17570	2	-0.21404
C16orf96	6	0.83002	0.86899	1	16761	1	0.086753	0.43378	0.67203	1	13225	3	0.086753
C16orf97	6	0.064845	0.17767	0.99687	3596	4	-0.39548	0.17467	0.39184	0.975177	8195	2	-0.39548
C17orf100	6	0.39507	0.61276	1	10691	2	0.18667	0.23965	0.48389	1	9823	3	0.18667
C17orf102	6	0.60113	0.74525	1	13648	1	0.26414	0.14096	0.34052	0.957267	7251	3	0.26414
C17orf104	6	0.96098	0.96094	1	19388	0	0.58047	0.015506	0.063673	0.814685	1567	5	0.58047
C17orf105	6	0.45605	0.64992	1	11520	1	0.3178	0.06132	0.19003	0.897646	4307	5	0.3178
C17orf107	6	0.26702	0.47224	1	8000	2	0.1938	0.40965	0.65293	1	12880	3	0.1938
C17orf112	6	0.99374	0.9938	1	20449	0	0.45408	0.006259	0.029157	0.761191	754	6	0.45408
C17orf47	6	0.20359	0.39878	1	6796	3	0.018428	0.51559	0.73682	1	14416	3	0.018428
C17orf49	6	0.062848	0.17356	0.988879	3548	4	-0.46899	0.82068	0.90756	1	17681	2	-0.46899
C17orf50	6	0.16132	0.34838	1	6005	3	-0.021078	0.36696	0.61856	1	12247	3	-0.021078
C17orf51	6	0.024413	0.086054	0.710965	2447	5	-0.40405	0.93465	0.9532	1	18799	1	-0.40405
C17orf53	6	0.14205	0.32481	1	5670	2	0.2321	0.26262	0.51493	1	10389	4	0.2321
C17orf58	6	0.12159	0.28877	1	5155	4	-0.17992	0.60814	0.80821	1	15754	2	-0.17992
C17orf59	6	0.14616	0.32987	1	5740	3	-0.22867	0.53249	0.74994	1	14668	2	-0.22867
C17orf62	6	0.49586	0.67497	1	12042	2	0.33046	0.12386	0.31335	0.949971	6714	3	0.33046
C17orf64	6	0.32777	0.54077	1	9258	2	0.12952	0.080302	0.23581	0.910182	5243	3	0.12952
C17orf66	6	0.00881	0.035168	0.424729	1692	5	-0.40348	0.64441	0.82407	1	16078	1	-0.40348
C17orf70	6	0.00032128	0.0017255	0.061796	577	3	-0.099874	0.2419	0.48695	1	9876	3	-0.099874
C17orf72	6	0.75137	0.83987	1	15891	1	0.031187	0.17489	0.39217	0.975177	8202	2	0.031187
C17orf74	6	0.92858	0.92916	1	18483	1	0.19685	0.049347	0.15933	0.888815	3653	4	0.19685
C17orf75	6	0.07785	0.20413	1	3961	4	-0.27806	0.63582	0.82049	1	16014	1	-0.27806
C17orf77	6	0.55122	0.71121	1	12870	2	0.10754	0.16042	0.37049	0.971246	7790	3	0.10754
C17orf78	6	0.343	0.5575	1	9604	1	0.26192	0.098627	0.27217	0.930164	5954	4	0.26192
C17orf80	6	0.99051	0.99057	1	20332	0	0.48325	0.0094923	0.042824	0.776443	1094	6	0.48325
C17orf82	6	0.87071	0.88891	1	17346	1	0.63574	0.10519	0.28305	0.935772	6158	4	0.63574
C17orf85	6	0.0060089	0.025261	0.346879	1490	5	-0.47845	0.4397	0.67677	1	13329	1	-0.47845
C17orf89	6	0.30031	0.50994	1	8678	2	0.18614	0.36445	0.61652	1	12213	3	0.18614
C17orf96	6	0.72263	0.83118	1	15643	1	0.41352	0.10395	0.28101	0.935096	6116	4	0.41352
C17orf97	6	0.94926	0.9493	1	19061	0	0.38298	0.073075	0.21869	0.907622	4889	4	0.38298
C17orf98	6	0.7046	0.82068	1	15399	2	-0.045489	0.011002	0.04893	0.787662	1235	2	-0.045489
C17orf99	6	0.90746	0.91213	1	17996	1	0.63036	0.030575	0.10828	0.860939	2556	5	0.63036
C18orf21	6	0.0058374	0.024635	0.340418	1480	3	-0.62625	0.94085	0.95573	1	18876	1	-0.62625
C18orf25	6	0.86499	0.88585	1	17237	1	0.34325	0.2334	0.47535	1	9657	4	0.34325
C18orf32	6	0.07859	0.20561	1	3980	3	-0.37473	0.32237	0.58222	1	11591	2	-0.37473
C18orf42	6	0.67838	0.80083	1	14939	2	0.011424	0.3324	0.59045	1	11729	3	0.011424
C18orf54	6	0.98498	0.98513	1	20124	0	0.51952	0.064594	0.19814	0.902688	4465	5	0.51952
C18orf63	6	0.99078	0.99083	1	20336	0	0.60827	0.0073677	0.033972	0.761407	889	6	0.60827
C18orf8	6	0.084409	0.21721	1	4142	2	0.087144	0.44445	0.6806	1	13407	3	0.087144
C19orf10	6	0.92977	0.93024	1	18525	1	0.11189	0.09348	0.26349	0.922854	5799	2	0.11189
C19orf12	6	0.41128	0.62246	1	10905	2	0.41843	0.063562	0.19558	0.90226	4413	4	0.41843
C19orf18	6	0.24197	0.44327	1	7505	2	-0.043236	0.25456	0.5041	1	10183	2	-0.043236
C19orf21	6	0.88474	0.89697	1	17580	1	0.26835	0.041047	0.13733	0.880623	3156	5	0.26835
C19orf24	6	0.27901	0.48594	1	8246	2	0.00077999	0.002258	0.011218	0.710634	306	2	0.00077999
C19orf25	6	0.6282	0.76433	1	14095	1	0.38284	0.083011	0.24225	0.910861	5388	4	0.38284
C19orf26	6	0.66811	0.79322	1	14756	2	-0.1401	0.83617	0.91629	1	17888	1	-0.1401
C19orf33	6	0.24379	0.4454	1	7539	3	-0.22851	0.32269	0.5825	1	11595	2	-0.22851
C19orf35	6	0.34294	0.55744	1	9602	3	-0.15709	0.31522	0.57631	1	11468	1	-0.15709
C19orf38	6	0.13729	0.31772	1	5566	2	-0.11204	0.82834	0.91184	1	17780	1	-0.11204
C19orf40	6	0.018799	0.068329	0.628581	2212	5	-0.71436	0.96701	0.96934	1	19271	1	-0.71436
C19orf43	6	0.00020386	0.0011133	0.044574	514	5	-1.0224	0.95753	0.9636	1	19108	1	-1.0224
C19orf44	6	0.11639	0.2791	1	5009	3	-0.14601	0.67725	0.83807	1	16356	2	-0.14601
C19orf45	6	0.54397	0.70641	1	12762	2	0.45657	0.045334	0.14878	0.885122	3435	4	0.45657
C19orf47	6	0.58061	0.7311	1	13317	1	0.46061	0.051687	0.16553	0.890472	3788	5	0.46061
C19orf48	6	0.069127	0.18642	1	3727	2	0.16947	0.18687	0.40975	0.981572	8513	3	0.16947
C19orf52	6	0.10727	0.26182	1	4764	3	-0.51688	0.98138	0.98157	1	19635	0	-0.51688
C19orf53	6	0.009365	0.03712	0.441097	1718	4	-0.84976	0.75214	0.87234	1	16977	2	-0.84976
C19orf54	6	0.36879	0.58571	1	10177	2	0.286	0.065033	0.19924	0.902688	4489	3	0.286
C19orf57	6	0.77987	0.84945	1	16202	1	0.44232	0.003794	0.018286	0.753718	484	5	0.44232
C19orf59	6	0.3318	0.54522	1	9348	3	0.13879	0.32806	0.58693	1	11667	3	0.13879
C19orf60	6	0.0026322	0.012905	0.21806	1204	5	-0.71046	0.99011	0.99019	1	19921	0	-0.71046
C19orf66	6	0.6696	0.79434	1	14792	2	0.10702	0.6109	0.8103	1	15792	3	0.10702
C19orf67	6	0.068396	0.18492	1	3699	3	-0.1057	0.51466	0.73609	1	14400	2	-0.1057
C19orf70	6	0.042979	0.13105	0.871454	3039	4	-0.42092	0.067395	0.20496	0.904083	4618	2	-0.42092
C19orf71	6	0.31512	0.52664	1	8979	3	-0.084798	0.73497	0.86414	1	16824	1	-0.084798
C19orf73	6	0.67512	0.79843	1	14888	2	0.19067	0.12395	0.31349	0.949971	6719	3	0.19067
C19orf77	6	0.46766	0.65716	1	11672	2	0.072224	0.092507	0.26185	0.922254	5762	3	0.072224
C19orf80	6	0.018457	0.06724	0.624898	2194	4	-0.59549	0.53668	0.75315	1	14722	2	-0.59549
C19orf81	6	0.90384	0.90949	1	17924	1	0.42768	0.064096	0.1969	0.902688	4438	4	0.42768
C19orf82	6	0.73042	0.83338	1	15700	1	0.17325	0.13886	0.33723	0.957147	7185	3	0.17325
C1D	6	0.0063394	0.026458	0.356214	1515	2	0.37988	0.17311	0.38953	0.975177	8140	4	0.37988
C1GALT1	6	0.34952	0.5647	1	9748	2	0.17248	0.20829	0.44042	0.993744	9052	4	0.17248
C1GALT1C1	6	0.93369	0.93391	1	18615	1	0.26974	0.15295	0.35912	0.967554	7575	4	0.26974
C1orf100	6	0.097288	0.2427	1	4487	4	-0.23118	0.65006	0.82648	1	16127	1	-0.23118
C1orf101	6	0.58241	0.73228	1	13345	2	0.1304	0.29608	0.55833	1	11164	4	0.1304
C1orf105	6	0.92601	0.92688	1	18408	1	0.36252	0.11129	0.29304	0.939042	6350	3	0.36252
C1orf106	6	0.68237	0.80382	1	15013	2	0.15752	0.27484	0.53092	1	10695	4	0.15752
C1orf109	6	0.014736	0.055163	0.557013	2018	3	-0.27376	0.99403	0.99408	1	20078	0	-0.27376
C1orf110	6	0.13367	0.31115	1	5459	1	0.041002	0.44918	0.68436	1	13486	2	0.041002
C1orf111	6	0.68343	0.8046	1	15027	2	-0.036185	0.73469	0.864	1	16823	2	-0.036185
C1orf112	6	0.075743	0.19993	1	3906	4	-0.3208	0.85447	0.92686	1	18097	2	-0.3208
C1orf115	6	0.48325	0.66694	1	11885	2	0.53008	0.09226	0.26144	0.922254	5757	4	0.53008
C1orf116	6	0.8546	0.88049	1	17075	1	0.39005	0.13085	0.32455	0.954023	6925	4	0.39005
C1orf122	6	0.0034089	0.015778	0.25123	1285	3	-0.51934	0.41342	0.65589	1	12926	2	-0.51934
C1orf123	6	0.3963	0.61347	1	10707	2	0.14945	0.46237	0.6948	1	13689	3	0.14945
C1orf127	6	0.44745	0.6446	1	11407	2	0.31584	0.059163	0.18461	0.895895	4200	4	0.31584
C1orf131	6	0.034086	0.11131	0.804506	2801	4	-0.80727	0.81253	0.90315	1	17591	2	-0.80727
C1orf141	6	0.97396	0.97405	1	19775	0	0.69874	0.032457	0.11356	0.867579	2663	4	0.69874
C1orf146	6	0.93564	0.93576	1	18672	1	0.267	0.10326	0.27985	0.935096	6089	3	0.267
C1orf151-NBL1	6	0.41925	0.62728	1	11010	2	0.34758	0.13505	0.33121	0.954735	7075	4	0.34758
C1orf158	6	0.93602	0.93613	1	18683	1	0.087775	0.40909	0.65249	1	12873	3	0.087775
C1orf159	6	0.17789	0.36824	1	6296	3	0.096515	0.38298	0.63153	1	12502	3	0.096515
C1orf162	6	0.50527	0.681	1	12187	2	0.071507	0.23169	0.47308	1	9619	2	0.071507
C1orf168	6	0.71414	0.82798	1	15568	2	0.27233	0.12357	0.31289	0.949971	6705	3	0.27233
C1orf172	6	0.76448	0.84413	1	16028	1	0.063459	0.33176	0.58993	1	11722	3	0.063459
C1orf173	6	0.23535	0.43558	1	7375	3	-0.10865	0.85622	0.92789	1	18124	2	-0.10865
C1orf174	6	0.15276	0.33798	1	5849	1	0.3431	0.13977	0.33868	0.957267	7215	4	0.3431
C1orf177	6	0.33756	0.55157	1	9479	3	-0.1435	0.081876	0.23958	0.910182	5323	2	-0.1435
C1orf185	6	0.44223	0.64137	1	11339	2	0.19457	0.34671	0.60208	1	11929	3	0.19457
C1orf186	6	0.077752	0.20394	1	3957	4	-0.43966	0.7602	0.87631	1	17048	2	-0.43966
C1orf189	6	0.24848	0.45074	1	7636	3	-0.043395	0.57636	0.78377	1	15322	3	-0.043395
C1orf192	6	0.63836	0.77156	1	14256	2	0.43768	0.059924	0.18651	0.896602	4236	4	0.43768
C1orf194	6	0.32201	0.53433	1	9128	3	0.011982	0.55222	0.76513	1	14978	3	0.011982
C1orf198	6	0.16403	0.35167	1	6050	1	0.04348	0.61085	0.81026	1	15791	2	0.04348
C1orf204	6	0.98603	0.98615	1	20170	0	0.3721	0.048939	0.15826	0.888658	3637	5	0.3721
C1orf21	6	0.30747	0.51801	1	8809	3	-0.14685	0.11728	0.30278	0.94281	6534	2	-0.14685
C1orf210	6	0.106	0.25943	1	4726	4	-0.21351	0.72369	0.85896	1	16725	2	-0.21351
C1orf216	6	0.44847	0.64524	1	11420	1	0.14102	0.12473	0.31475	0.950863	6743	3	0.14102
C1orf226	6	0.67219	0.79626	1	14829	2	-0.10077	0.65434	0.82822	1	16168	2	-0.10077
C1orf227	6	0.3026	0.51253	1	8715	3	-0.15181	0.58805	0.79285	1	15486	2	-0.15181
C1orf228	6	0.25738	0.46119	1	7791	3	-0.21557	0.76248	0.8774	1	17078	2	-0.21557
C1orf229	6	0.29971	0.50928	1	8666	2	0.19508	0.46426	0.69631	1	13717	2	0.19508
C1orf233	6	0.27477	0.4811	1	8151	2	-0.043681	0.63038	0.81825	1	15966	2	-0.043681
C1orf234	6	0.71328	0.82733	1	15555	2	0.38245	0.11186	0.29396	0.939042	6376	4	0.38245
C1orf27	6	0.98447	0.98462	1	20108	0	0.29698	0.12592	0.31666	0.952839	6771	4	0.29698
C1orf35	6	0.8967	0.90463	1	17796	1	0.39721	0.063037	0.19428	0.901087	4391	4	0.39721
C1orf43	6	0.6153	0.75524	1	13857	2	0.66755	0.013902	0.058649	0.807552	1448	4	0.66755
C1orf50	6	0.84906	0.87776	1	16996	1	0.34466	0.0012437	0.0063656	0.680397	179	4	0.34466
C1orf51	6	0.37041	0.58747	1	10215	1	-0.050172	0.73255	0.86303	1	16809	1	-0.050172
C1orf52	6	0.99798	0.99799	1	20599	0	0.84182	0.002018	0.010097	0.699013	285	6	0.84182
C1orf53	6	0.51063	0.68446	1	12261	2	0.70763	0.0056478	0.026469	0.761191	688	4	0.70763
C1orf54	6	0.9427	0.94281	1	18866	0	0.41012	0.10848	0.2884	0.937125	6267	4	0.41012
C1orf56	6	0.58011	0.73075	1	13305	2	-0.11811	0.43206	0.67068	1	13197	2	-0.11811
C1orf61	6	0.91555	0.9182	1	18179	1	0.29737	0.086503	0.2503	0.913446	5550	5	0.29737
C1orf63	6	0.77614	0.84813	1	16159	1	0.25085	0.21356	0.44788	0.996004	9196	4	0.25085
C1orf64	6	0.063869	0.17569	0.993694	3567	3	-0.072976	0.091548	0.26024	0.920282	5740	3	-0.072976
C1orf65	6	0.88632	0.89792	1	17607	1	0.59831	0.052499	0.16763	0.8915	3836	5	0.59831
C1orf68	6	0.28471	0.49232	1	8346	2	0.18134	0.28361	0.54229	1	10900	4	0.18134
C1orf74	6	0.088287	0.22495	1	4240	3	-0.11774	0.23123	0.47244	1	9605	1	-0.11774
C1orf85	6	0.32924	0.54237	1	9294	3	0.039303	0.017765	0.070589	0.816005	1737	3	0.039303
C1orf86	6	0.29104	0.4995	1	8479	3	-0.15623	0.43639	0.67411	1	13262	2	-0.15623
C1orf87	6	0.98741	0.98749	1	20223	0	0.71809	0.0072225	0.033361	0.761377	872	5	0.71809
C1orf94	6	0.26642	0.47157	1	7985	2	0.063126	0.1541	0.36086	0.968139	7603	2	0.063126
C1orf95	6	0.62989	0.76551	1	14123	2	0.15421	0.18387	0.40531	0.97944	8439	3	0.15421
C1QA	6	0.95143	0.95151	1	19135	0	0.21082	0.45413	0.68831	1	13562	3	0.21082
C1QB	6	0.60327	0.74674	1	13683	1	0.2129	0.24659	0.49326	1	9984	3	0.2129
C1QBP	6	0.32962	0.54279	1	9302	3	0.056361	0.59183	0.79578	1	15545	3	0.056361
C1QC	6	0.98695	0.98703	1	20199	0	0.44191	0.043272	0.14329	0.880623	3313	5	0.44191
C1QL1	6	0.69664	0.81455	1	15261	2	0.15582	0.05391	0.17124	0.892097	3914	3	0.15582
C1QL2	6	0.74257	0.83706	1	15801	1	0.22985	0.24111	0.48591	1	9860	4	0.22985
C1QL3	6	0.244	0.44564	1	7543	2	-0.062699	0.50215	0.72615	1	14238	2	-0.062699
C1QL4	6	0.91158	0.91513	1	18087	1	0.0041524	0.3471	0.6024	1	11931	2	0.0041524
C1QTNF1	6	0.65313	0.78221	1	14517	2	0.084681	0.51531	0.73662	1	14414	3	0.084681
C1QTNF2	6	0.8289	0.86851	1	16742	1	0.41948	0.04423	0.14589	0.88275	3371	5	0.41948
C1QTNF3	6	0.77823	0.84886	1	16187	1	0.27903	0.08369	0.24378	0.911276	5418	5	0.27903
C1QTNF4	6	0.55397	0.71304	1	12909	2	0.14283	0.54401	0.75883	1	14827	3	0.14283
C1QTNF5	6	0.52367	0.6929	1	12463	2	0.23861	0.2176	0.45351	0.998517	9292	3	0.23861
C1QTNF6	6	0.14879	0.33309	1	5791	3	-0.15374	0.46876	0.69984	1	13777	3	-0.15374
C1QTNF7	6	0.59212	0.73906	1	13507	2	0.22783	0.27989	0.5375	1	10819	4	0.22783
C1QTNF8	6	0.91544	0.9181	1	18176	1	0.1369	0.24438	0.49028	1	9923	3	0.1369
C1QTNF9	6	0.13165	0.30739	1	5402	3	-0.275	0.82199	0.90828	1	17695	2	-0.275
C1QTNF9B	3	0.031165	0.078036	0.673629	2722	2	-0.76515	0.38681	0.53917	1	12554	1	-0.76515
C1QTNF9B-AS1	6	0.25836	0.46232	1	7816	2	0.02491	0.25061	0.4987	1	10073	1	0.02491
C1R	6	0.71371	0.82765	1	15561	2	0.037447	0.5783	0.78525	1	15344	3	0.037447
C1RL	6	0.35812	0.57402	1	9925	1	0.32247	0.048995	0.15841	0.888767	3640	5	0.32247
C1S	6	0.15204	0.33711	1	5835	3	0.018997	0.22677	0.46636	1	9515	3	0.018997
C2	6	0.25305	0.45614	1	7714	2	0.42578	0.15682	0.36504	0.969651	7679	4	0.42578
C20orf111	6	0.46919	0.65814	1	11689	2	0.19535	0.23394	0.47607	1	9672	4	0.19535
C20orf112	6	0.080645	0.20964	1	4036	4	-0.39819	0.64397	0.82388	1	16072	2	-0.39819
C20orf141	6	0.94813	0.94819	1	19018	0	0.37077	0.065391	0.2001	0.902806	4511	5	0.37077
C20orf144	6	0.63005	0.76562	1	14127	1	0.35437	0.081751	0.23927	0.910182	5316	4	0.35437
C20orf166	6	0.074966	0.19832	1	3886	4	-0.29879	0.66262	0.83175	1	16233	2	-0.29879
C20orf173	6	0.27595	0.48244	1	8175	2	0.42634	0.092101	0.26117	0.921615	5753	4	0.42634
C20orf194	6	0.42179	0.62884	1	11044	2	0.18352	0.10337	0.28004	0.935096	6095	3	0.18352
C20orf195	6	0.61443	0.75461	1	13847	2	-0.024321	0.42969	0.66883	1	13162	2	-0.024321
C20orf196	6	0.31725	0.52901	1	9019	3	-0.20613	0.6323	0.81906	1	15989	1	-0.20613
C20orf197	6	0.58952	0.73721	1	13460	2	0.084889	0.51902	0.73948	1	14466	2	0.084889
C20orf201	6	0.6451	0.77641	1	14373	1	0.11603	0.34524	0.6009	1	11899	3	0.11603
C20orf202	6	0.27905	0.48598	1	8247	3	-0.17493	0.81675	0.90546	1	17636	2	-0.17493
C20orf24	6	0.010968	0.042548	0.477111	1815	3	-0.32248	0.78261	0.88752	1	17291	2	-0.32248
C20orf26	6	0.22837	0.42761	1	7236	2	0.29151	0.20269	0.43256	0.992576	8899	4	0.29151
C20orf27	6	0.1624	0.34969	1	6025	1	0.17136	0.46678	0.69829	1	13753	3	0.17136
[truncated: 18,701 more rows]

## Sheet: PBS_GeCKO_gene_summary
id	num	neg|score	neg|p-value	neg|fdr	neg|rank	neg|goodsgrna	neg|lfc	pos|score	pos|p-value	pos|fdr	pos|rank	pos|goodsgrna	pos|lfc
A1BG	6	0.05167	0.15019	0.974072	3133	4	-0.29661	0.20501	0.40289	0.98778	8323	2	-0.29661
A1CF	6	0.4801	0.66591	1	11633	2	0.18696	0.044933	0.13639	0.906716	3035	3	0.18696
A2M	6	0.45551	0.6506	1	11290	2	-0.10108	0.49528	0.67799	1	13380	2	-0.10108
A2ML1	6	0.083833	0.21619	1	3881	3	-0.26208	0.11644	0.27944	0.953687	5941	1	-0.26208
A3GALT2	6	0.12614	0.29729	1	4898	4	-0.32715	0.59505	0.743	1	14609	2	-0.32715
A4GALT	6	0.96497	0.96494	1	19566	0	0.63689	0.0023255	0.011521	0.755869	295	4	0.63689
A4GNT	6	0.015016	0.056114	0.545077	2105	2	0.062062	0.33737	0.55208	1	11051	3	0.062062
AAAS	6	0.26324	0.46837	1	7499	2	0.097413	0.57922	0.73228	1	14391	2	0.097413
AACS	6	0.45677	0.65138	1	11306	2	0.31336	0.009234	0.036789	0.805857	934	4	0.31336
AADAC	6	0.12889	0.30236	1	4970	2	-0.054804	0.52423	0.69623	1	13708	2	-0.054804
AADACL2	6	0.68085	0.80283	1	14852	2	0.01687	0.16414	0.35491	0.97149	7435	2	0.01687
AADACL3	6	0.65821	0.78611	1	14473	1	-0.082169	0.98234	0.98253	1	19618	0	-0.082169
AADACL4	6	0.86127	0.88444	1	17172	1	0.43069	0.01107	0.042997	0.821823	1063	4	0.43069
AADAT	6	0.12464	0.29447	1	4864	3	-0.15679	0.2386	0.44133	0.996252	9017	3	-0.15679
AAED1	6	0.13709	0.31739	1	5195	4	-0.41147	0.5133	0.68929	1	13588	2	-0.41147
AAGAB	6	0.00045637	0.0024128	0.061358	809	4	-1.0511	0.61368	0.75571	1	14822	1	-1.0511
AAK1	6	0.31603	0.52792	1	8633	2	0.53401	0.0065605	0.027442	0.788145	683	4	0.53401
AAMDC	6	0.079827	0.20817	1	3784	4	-0.35473	0.63658	0.77154	1	15112	1	-0.35473
AAMP	6	0.00059972	0.0031609	0.072863	893	4	-0.69156	0.52311	0.69554	1	13692	1	-0.69156
AANAT	6	0.31965	0.53196	1	8712	2	0.068643	0.35722	0.57356	1	11438	3	0.068643
AAR2	6	0.2713	0.47755	1	7677	2	-0.12809	0.68877	0.8091	1	15769	2	-0.12809
AARD	6	0.9676	0.9676	1	19652	0	0.27842	0.09111	0.23104	0.94617	4938	4	0.27842
AARS	6	0.0071514	0.029433	0.355878	1696	4	-1.3367	0.79467	0.85802	1	16808	1	-1.3367
AARS2	6	0.001165	0.0059939	0.114717	1078	4	-0.65567	0.90658	0.91253	1	18029	1	-0.65567
AARSD1	6	0.081074	0.21066	1	3817	4	-0.20707	0.046411	0.1396	0.909154	3092	1	-0.20707
AASDH	6	0.89911	0.90654	1	17820	1	0.16996	0.14446	0.33068	0.96726	6959	3	0.16996
AASDHPPT	6	0.00025714	0.0013864	0.042123	680	5	-0.97683	0.99545	0.99551	1	20074	0	-0.97683
AASS	6	0.072678	0.19385	1	3607	4	-0.61102	0.087174	0.22321	0.940143	4810	2	-0.61102
AATF	6	0.014429	0.054159	0.53303	2081	5	-0.6697	0.99709	0.99715	1	20172	0	-0.6697
AATK	6	0.25696	0.46116	1	7373	3	-0.23716	0.0032011	0.015187	0.764894	393	2	-0.23716
ABAT	6	0.18125	0.37295	1	5949	3	-0.23422	0.23284	0.43482	0.994502	8910	2	-0.23422
ABCA1	6	0.67396	0.79773	1	14747	2	0.20363	0.059049	0.16651	0.926805	3651	3	0.20363
ABCA10	6	0.99933	0.99934	1	20665	0	0.43233	0.00066528	0.0034857	0.656017	104	6	0.43233
ABCA12	6	0.31648	0.5284	1	8643	2	0.18234	0.3289	0.54282	1	10882	3	0.18234
ABCA13	6	0.94265	0.94275	1	18884	0	0.24417	0.098984	0.24643	0.948582	5263	4	0.24417
ABCA2	6	0.95893	0.95888	1	19372	0	0.44636	0.0087311	0.035039	0.796171	896	3	0.44636
ABCA3	6	0.12025	0.28634	1	4752	4	-0.27092	0.23546	0.43778	0.995611	8962	2	-0.27092
ABCA4	6	0.87515	0.89185	1	17399	1	-0.020449	0.69767	0.81573	1	15894	1	-0.020449
ABCA5	6	0.66205	0.78891	1	14542	1	0.31711	0.067647	0.18419	0.926907	4030	4	0.31711
ABCA6	6	0.32973	0.54313	1	8950	2	0.15011	0.054402	0.15669	0.919011	3442	3	0.15011
ABCA7	6	0.069501	0.18737	1	3543	4	-0.50772	0.96202	0.96201	1	19106	0	-0.50772
ABCA8	6	0.24838	0.45108	1	7215	3	-0.14358	0.52281	0.69534	1	13687	2	-0.14358
ABCA9	6	0.27495	0.48167	1	7761	2	0.1486	0.078815	0.20671	0.936341	4481	3	0.1486
ABCB1	6	0.43161	0.63591	1	10955	2	0.28325	0.12222	0.29015	0.954104	6173	4	0.28325
ABCB10	6	0.95966	0.9596	1	19400	0	0.40562	0.028053	0.097184	0.882131	2228	5	0.40562
ABCB11	6	0.90041	0.90743	1	17853	1	0.00607	0.11899	0.28416	0.953687	6051	1	0.00607
ABCB4	6	0.88147	0.89544	1	17503	1	-0.053101	0.16158	0.35182	0.97149	7362	2	-0.053101
ABCB5	6	0.24976	0.45268	1	7240	2	0.083145	0.13993	0.32258	0.965319	6798	1	0.083145
ABCB6	6	0.93562	0.93575	1	18692	1	0.14913	0.13837	0.31975	0.964265	6746	4	0.14913
ABCB7	6	5.6e-06	3.99e-05	0.004306	189	5	-1.5493	0.99608	0.99613	1	20108	0	-1.5493
ABCB8	6	0.21331	0.41066	1	6553	2	0.14623	0.24019	0.44318	0.996252	9046	3	0.14623
ABCB9	6	0.01373	0.0518	0.516997	2054	5	-0.35782	0.6989	0.81668	1	15913	1	-0.35782
ABCC1	6	0.99181	0.99187	1	20417	0	0.20038	0.043159	0.13254	0.906278	2948	4	0.20038
ABCC10	6	0.50156	0.67947	1	11935	2	0.027275	0.65097	0.78175	1	15280	2	0.027275
ABCC11	6	0.64227	0.77463	1	14207	2	0.047299	0.099408	0.24729	0.948582	5281	2	0.047299
ABCC12	6	0.59296	0.74012	1	13365	1	0.16044	0.034908	0.11435	0.898002	2590	3	0.16044
ABCC2	6	0.52702	0.6959	1	12277	2	0.03974	0.58486	0.73606	1	14465	2	0.03974
ABCC3	6	0.50542	0.68192	1	11992	2	0.18414	0.28752	0.49685	1	10029	3	0.18414
ABCC4	6	0.52217	0.6927	1	12217	1	0.31178	0.0492	0.14555	0.911616	3222	4	0.31178
ABCC5	6	0.99519	0.99525	1	20534	0	0.32299	0.050622	0.14865	0.916754	3283	4	0.32299
ABCC6	6	0.05233	0.15162	0.974726	3157	4	-0.57233	0.92731	0.92843	1	18382	1	-0.57233
ABCC8	6	0.66287	0.78951	1	14557	2	0.12147	0.12113	0.28812	0.953687	6134	3	0.12147
ABCC9	6	0.023598	0.083552	0.695708	2454	5	-0.571	0.97312	0.97316	1	19357	0	-0.571
ABCD1	6	0.044062	0.13374	0.919338	2957	4	-0.49922	0.82778	0.87079	1	17099	1	-0.49922
ABCD2	6	0.087074	0.22261	1	3954	4	-0.25879	0.95603	0.95603	1	18990	0	-0.25879
ABCD3	6	0.52547	0.69488	1	12263	2	0.31278	0.092047	0.23285	0.94737	4972	4	0.31278
ABCD4	6	0.31479	0.5265	1	8597	3	0.061503	0.14395	0.32976	0.96726	6943	3	0.061503
ABCE1	6	0.0036459	0.016698	0.239708	1430	4	-0.69772	0.9489	0.94894	1	18847	0	-0.69772
ABCF1	6	0.015705	0.058346	0.556827	2142	4	-0.94256	0.61136	0.75409	1	14792	1	-0.94256
ABCF2	6	0.048987	0.14435	0.955311	3069	4	-0.3307	0.376	0.59381	1	11812	1	-0.3307
ABCF3	6	0.32959	0.54295	1	8945	2	0.11461	0.39418	0.61329	1	12163	3	0.11461
ABCG1	6	0.23095	0.43106	1	6869	3	-0.088097	0.22704	0.42823	0.992865	8789	2	-0.088097
ABCG2	6	0.083141	0.21482	1	3860	3	0.12446	0.025541	0.08952	0.879085	2051	3	0.12446
ABCG4	6	0.092475	0.2333	1	4079	4	-0.29668	0.8593	0.88508	1	17430	1	-0.29668
ABCG5	6	0.95062	0.95067	1	19117	0	0.42471	0.084457	0.2179	0.938962	4698	4	0.42471
ABCG8	6	0.57987	0.73113	1	13139	1	0.053769	0.17835	0.37165	0.977168	7758	3	0.053769
ABHD1	6	0.99727	0.9973	1	20595	0	0.4148	0.0027322	0.013458	0.755869	351	6	0.4148
ABHD10	6	0.96635	0.96633	1	19607	0	-0.020595	0.18575	0.38039	0.982145	7909	2	-0.020595
ABHD11	6	0.013393	0.050703	0.510735	2033	3	-0.26243	0.69997	0.81749	1	15929	2	-0.26243
ABHD12	6	0.055621	0.15866	0.996236	3228	4	-0.42852	0.87591	0.89363	1	17609	1	-0.42852
ABHD12B	6	0.42089	0.62942	1	10812	2	0.097917	0.12095	0.2878	0.953687	6126	2	0.097917
ABHD13	6	0.92082	0.92261	1	18311	1	0.26813	0.075683	0.20049	0.935411	4343	4	0.26813
ABHD14A	6	0.92769	0.92845	1	18483	1	0.16358	0.22251	0.42294	0.992681	8691	3	0.16358
ABHD14B	6	0.13471	0.31307	1	5130	3	-0.42487	0.87345	0.89231	1	17579	1	-0.42487
ABHD15	6	0.13565	0.31478	1	5156	4	-0.40083	0.56588	0.72334	1	14241	2	-0.40083
ABHD16A	6	0.96056	0.96052	1	19429	0	0.16979	0.07633	0.20177	0.935411	4374	3	0.16979
ABHD16B	6	0.5177	0.68985	1	12153	2	0.069632	0.2507	0.45517	0.998196	9287	2	0.069632
ABHD17A	6	0.22781	0.42749	1	6808	3	-0.24322	0.5146	0.69014	1	13601	2	-0.24322
ABHD17B	6	0.98447	0.98462	1	20166	0	0.4108	0.016368	0.060509	0.84232	1458	5	0.4108
ABHD17C	6	0.53793	0.70309	1	12453	2	-0.010791	0.59547	0.74329	1	14615	2	-0.010791
ABHD2	6	0.9913	0.99137	1	20400	0	0.35	0.012892	0.049128	0.82295	1213	5	0.35
ABHD3	6	0.33696	0.55107	1	9101	3	-0.041578	0.53961	0.70625	1	13925	2	-0.041578
ABHD4	6	0.95938	0.95932	1	19389	0	0.35876	0.0086082	0.034616	0.796171	885	5	0.35876
ABHD5	6	0.26058	0.46536	1	7440	3	-0.15174	0.10975	0.26687	0.952549	5682	2	-0.15174
ABHD6	6	0.063502	0.17513	1	3394	4	-0.52728	0.023859	0.08437	0.878761	1930	2	-0.52728
ABHD8	6	0.36829	0.58526	1	9835	2	-0.096288	0.51971	0.69337	1	13651	2	-0.096288
ABI1	6	0.18039	0.37193	1	5932	2	0.11781	0.14229	0.32678	0.966947	6873	3	0.11781
ABI2	6	0.34089	0.55536	1	9188	3	-0.033847	0.92447	0.92607	1	18323	1	-0.033847
ABI3	6	0.23614	0.43703	1	6981	2	0.054222	0.72064	0.83297	1	16233	1	0.054222
ABI3BP	6	0.60455	0.74809	1	13539	2	0.11203	0.31465	0.52711	1	10579	3	0.11203
ABL1	6	0.073698	0.19591	1	3632	4	-0.21703	0.60054	0.7467	1	14673	1	-0.21703
ABL2	6	0.021135	0.075778	0.655573	2366	4	-0.41627	0.80813	0.86297	1	16912	1	-0.41627
ABLIM1	6	0.79162	0.85452	1	16273	1	0.29295	0.065353	0.17951	0.926907	3914	4	0.29295
ABLIM2	6	0.37999	0.59794	1	10097	2	-0.028478	0.93134	0.93194	1	18456	1	-0.028478
ABLIM3	6	0.9493	0.94934	1	19084	0	0.20148	0.19856	0.39541	0.985485	8196	3	0.20148
ABO	6	0.04137	0.12785	0.895884	2904	2	-0.037742	0.039656	0.12489	0.903874	2788	3	-0.037742
ABP1	6	0.93392	0.93417	1	18652	1	0.056271	0.38615	0.60476	1	11994	3	0.056271
ABR	6	0.68439	0.80547	1	14919	2	-0.033548	0.82673	0.87035	1	17089	1	-0.033548
ABRA	6	0.078147	0.20489	1	3739	3	-0.26879	0.85435	0.88265	1	17381	1	-0.26879
ABRACL	6	0.50953	0.68455	1	12051	2	-0.12593	0.36307	0.57989	1	11563	2	-0.12593
ABT1	6	0.0012527	0.0064187	0.119878	1103	4	-1.3787	0.13157	0.30736	0.958316	6513	2	-1.3787
ABTB1	6	0.064678	0.17755	1	3433	4	-0.35579	0.8801	0.89595	1	17651	1	-0.35579
ABTB2	6	0.91028	0.91438	1	18050	1	0.15847	0.11519	0.27708	0.953687	5888	4	0.15847
ACAA1	6	0.074799	0.19814	1	3657	4	-0.32578	0.93289	0.93333	1	18481	1	-0.32578
ACAA2	6	0.62598	0.76315	1	13908	1	0.21977	0.12785	0.30052	0.956978	6376	3	0.21977
ACACA	6	0.0029247	0.01401	0.211866	1352	5	-0.64497	0.88133	0.89665	1	17668	1	-0.64497
ACACB	6	0.68459	0.80562	1	14923	2	0.086329	0.25681	0.4623	1	9415	3	0.086329
ACAD10	6	0.92382	0.92509	1	18383	1	0.078499	0.22393	0.42457	0.992865	8720	3	0.078499
ACAD11	6	0.9444	0.94447	1	18939	0	0.18123	0.012145	0.046585	0.82295	1138	3	0.18123
ACAD8	6	0.88428	0.89713	1	17557	1	-0.057939	0.9818	0.98198	1	19605	0	-0.057939
ACAD9	6	0.019686	0.071215	0.633648	2298	5	-0.31026	0.67411	0.79837	1	15593	1	-0.31026
ACADL	6	0.59943	0.74456	1	13457	2	0.033798	0.33179	0.54599	1	10936	2	0.033798
ACADM	6	0.13577	0.31498	1	5160	2	0.058782	0.69009	0.8101	1	15787	2	0.058782
ACADS	6	0.13936	0.32153	1	5268	2	0.096435	0.32675	0.54047	1	10837	2	0.096435
ACADSB	6	0.15415	0.34048	1	5517	3	-0.093605	0.17487	0.36759	0.975681	7684	2	-0.093605
ACADVL	6	0.32514	0.53803	1	8841	1	0.12871	0.25396	0.459	0.998441	9366	3	0.12871
ACAN	6	0.56014	0.71771	1	12803	2	0.00036222	0.9476	0.94767	1	18810	0	0.00036222
ACAP1	6	0.34152	0.55603	1	9203	2	0.11429	0.27824	0.48651	1	9845	3	0.11429
ACAP2	6	0.44789	0.64593	1	11187	2	-0.012852	0.31686	0.52955	1	10617	3	-0.012852
ACAP3	6	0.0055002	0.023444	0.304678	1574	5	-0.4211	0.77701	0.85193	1	16645	1	-0.4211
ACAT1	6	0.96053	0.9605	1	19427	0	0.23875	0.077324	0.20374	0.935411	4418	4	0.23875
ACAT2	6	0.7502	0.8405	1	15825	1	0.18713	0.1765	0.36949	0.976323	7714	3	0.18713
ACBD3	6	0.37969	0.59762	1	10086	2	-0.0091156	0.11765	0.28166	0.953687	5992	2	-0.0091156
ACBD4	6	0.36526	0.58196	1	9757	3	-0.12951	0.36232	0.5791	1	11548	1	-0.12951
ACBD5	6	0.67789	0.80063	1	14809	2	0.081208	0.60142	0.74727	1	14688	2	0.081208
ACBD6	6	0.54781	0.70962	1	12613	2	-0.069574	0.50237	0.68241	1	13464	2	-0.069574
ACBD7	6	0.44924	0.64679	1	11207	2	0.16269	0.22251	0.42294	0.992681	8690	3	0.16269
ACCS	6	0.17309	0.36329	1	5811	3	-0.14733	0.78094	0.85327	1	16678	1	-0.14733
ACCSL	6	0.67048	0.79518	1	14680	1	0.74549	0.00017092	0.0009382	0.530285	31	5	0.74549
ACD	6	0.32526	0.53816	1	8843	3	-0.19384	0.3222	0.53545	1	10737	2	-0.19384
ACE	6	0.5645	0.72067	1	12869	2	0.019635	0.14664	0.33381	0.968054	7021	3	0.019635
ACE2	6	0.34982	0.56517	1	9409	2	0.0058831	0.31473	0.52718	1	10581	2	0.0058831
ACER1	6	0.071727	0.19191	1	3583	3	-0.27186	0.39041	0.60928	1	12075	2	-0.27186
ACER2	6	0.69261	0.81161	1	15059	1	0.19294	0.028806	0.099503	0.885454	2275	5	0.19294
ACER3	6	0.97054	0.97055	1	19742	0	0.5326	0.0077682	0.031723	0.788145	806	4	0.5326
ACHE	6	0.44605	0.64477	1	11158	2	0.12787	0.36656	0.58365	1	11628	3	0.12787
ACIN1	6	0.97628	0.9764	1	19902	0	0.10745	0.51975	0.69339	1	13652	2	0.10745
ACKR2	6	0.12929	0.30309	1	4979	4	-0.23963	0.88504	0.89878	1	17726	1	-0.23963
ACKR3	6	0.18485	0.37723	1	6016	3	-0.045899	0.22193	0.42227	0.992267	8680	2	-0.045899
ACKR4	6	0.887	0.89873	1	17598	1	0.20953	0.10754	0.26269	0.952549	5581	4	0.20953
ACLY	6	0.015934	0.05907	0.561671	2151	4	-0.44649	0.90966	0.91465	1	18071	1	-0.44649
ACMSD	6	0.7141	0.82796	1	15470	2	0.65254	0.0054663	0.023445	0.782477	588	4	0.65254
ACN9	6	0.98282	0.983	1	20104	0	0.14583	0.21191	0.41078	0.988622	8476	2	0.14583
ACO1	6	0.19884	0.39379	1	6279	2	0.15353	0.062094	0.17286	0.926907	3773	3	0.15353
ACO2	6	0.00038322	0.0020436	0.054654	772	5	-0.95491	0.9661	0.9661	1	19182	0	-0.95491
ACOT1	6	0.45725	0.65165	1	11313	1	0.12885	0.22625	0.42728	0.992865	8766	3	0.12885
ACOT11	6	0.21144	0.40847	1	6520	3	-0.12611	0.67736	0.80074	1	15632	2	-0.12611
ACOT12	6	0.51589	0.68866	1	12132	2	0.45059	0.031361	0.10634	0.890391	2421	4	0.45059
ACOT13	6	0.99836	0.99836	1	20632	0	0.3248	0.0016415	0.0082664	0.745179	224	6	0.3248
ACOT2	6	0.43601	0.63857	1	11013	2	-0.09216	0.27568	0.48361	1	9796	2	-0.09216
ACOT4	6	0.58419	0.73406	1	13212	2	0.12612	0.010551	0.041314	0.816813	1029	3	0.12612
ACOT6	6	0.933	0.93327	1	18619	1	0.27562	0.048595	0.14426	0.911616	3191	4	0.27562
ACOT7	6	0.60522	0.74856	1	13553	2	0.26416	0.13713	0.31749	0.963222	6701	4	0.26416
ACOT8	6	0.13105	0.30634	1	5032	4	-0.28037	0.47965	0.66829	1	13208	2	-0.28037
ACOT9	6	0.98748	0.98756	1	20274	0	0.1759	0.21434	0.4136	0.988622	8529	3	0.1759
ACOX1	6	0.71031	0.8251	1	15398	1	0.20011	0.21759	0.4173	0.989779	8598	3	0.20011
ACOX2	6	0.84922	0.87845	1	16994	1	0.16948	0.2549	0.46011	0.99887	9385	3	0.16948
ACOX3	6	0.23347	0.43394	1	6928	1	0.12062	0.27775	0.48595	1	9831	3	0.12062
ACOXL	6	0.72732	0.83356	1	15638	1	0.04183	0.92267	0.92455	1	18292	1	0.04183
ACP1	6	0.24637	0.44879	1	7169	2	-0.048843	0.49229	0.67608	1	13342	2	-0.048843
ACP2	6	0.043366	0.13221	0.914097	2945	4	-0.50897	0.9811	0.98127	1	19582	0	-0.50897
ACP5	6	0.29952	0.50933	1	8290	2	-0.089432	0.50143	0.68184	1	13451	2	-0.089432
ACP6	6	0.45385	0.64959	1	11264	2	0.051434	0.25052	0.45495	0.998196	9278	2	0.051434
ACPL2	6	0.83761	0.87306	1	16821	1	0.024824	0.92592	0.92726	1	18353	1	0.024824
ACPP	6	0.57206	0.72583	1	12993	2	-0.21746	0.58129	0.73367	1	14416	1	-0.21746
ACPT	6	0.49527	0.67547	1	11851	2	0.076612	0.4001	0.61949	1	12294	3	0.076612
ACR	6	0.52268	0.69303	1	12221	2	0.22674	0.10712	0.2619	0.952549	5562	4	0.22674
ACRBP	6	0.64001	0.77305	1	14165	1	0.24636	0.025638	0.089809	0.879085	2056	3	0.24636
ACRC	5	0.96694	0.96707	1	19625	0	0.34882	0.048272	0.13659	0.906716	3176	4	0.34882
ACRV1	6	0.13393	0.31164	1	5107	4	-0.20454	0.68287	0.80478	1	15703	1	-0.20454
ACSBG1	6	0.33511	0.54901	1	9065	2	-0.10789	0.0087886	0.035236	0.79801	899	1	-0.10789
ACSBG2	6	0.24906	0.45186	1	7227	3	0.051648	0.11358	0.27409	0.953687	5828	3	0.051648
ACSF2	6	0.1049	0.25746	1	4370	4	-0.25682	0.33793	0.55267	1	11058	2	-0.25682
ACSF3	6	0.97438	0.97447	1	19844	0	0.028828	0.18866	0.38377	0.983012	7973	2	0.028828
ACSL1	6	0.829	0.86927	1	16707	1	0.10702	0.10626	0.26025	0.952549	5523	2	0.10702
ACSL3	6	0.50053	0.67883	1	11924	1	0.20373	0.098584	0.2456	0.948582	5244	3	0.20373
ACSL4	6	0.0073219	0.03005	0.361018	1705	5	-0.45071	0.45759	0.6548	1	12930	1	-0.45071
ACSL5	6	0.70391	0.82021	1	15273	2	-0.026674	0.49998	0.68093	1	13435	2	-0.026674
ACSL6	6	0.98069	0.98087	1	20034	0	0.038996	0.06672	0.18229	0.926907	3985	2	0.038996
ACSM1	6	0.15787	0.34501	1	5569	1	0.088931	0.0252	0.088474	0.879085	2033	2	0.088931
ACSM2A	6	0.85672	0.88217	1	17104	1	0.16309	0.23053	0.43218	0.993426	8863	3	0.16309
ACSM2B	6	0.37546	0.59302	1	9987	1	0.092023	0.22576	0.42671	0.992865	8756	3	0.092023
ACSM3	6	0.94462	0.94471	1	18945	0	-0.023514	0.20475	0.40259	0.98778	8311	2	-0.023514
ACSM4	6	0.0076967	0.031366	0.369956	1734	5	-0.37017	0.44793	0.64898	1	12829	1	-0.37017
ACSM5	6	0.064622	0.17743	1	3432	4	-0.46781	0.63029	0.76716	1	15026	1	-0.46781
ACSS1	6	0.97887	0.979	1	19980	0	0.24086	0.19328	0.3892	0.984709	8072	3	0.24086
ACSS2	6	0.7167	0.82998	1	15528	1	0.21476	0.034026	0.11239	0.896629	2546	4	0.21476
ACSS3	6	0.35267	0.56828	1	9465	3	-0.19382	0.95481	0.95485	1	18970	0	-0.19382
ACTA1	6	0.13711	0.31743	1	5197	3	-0.32234	0.32418	0.53764	1	10780	1	-0.32234
ACTA2	6	0.11598	0.27839	1	4641	2	0.28478	0.0031811	0.015128	0.764894	391	4	0.28478
ACTB	6	0.0065884	0.027426	0.339609	1659	5	-1.3906	0.97823	0.97835	1	19488	0	-1.3906
ACTBL2	6	0.96937	0.96938	1	19712	0	0.058859	0.92511	0.92661	1	18337	1	0.058859
ACTC1	6	0.96811	0.96809	1	19664	0	0.53982	0.0010233	0.0052937	0.706364	150	5	0.53982
ACTG1	6	0.83057	0.86994	1	16724	1	-0.10894	0.88546	0.89903	1	17731	1	-0.10894
ACTG2	6	0.95818	0.95813	1	19351	0	0.17431	0.40034	0.61974	1	12299	3	0.17431
ACTL10	6	0.9443	0.94438	1	18937	0	0.06268	0.036436	0.11776	0.898617	2653	3	0.06268
ACTL6A	6	0.00036201	0.0019269	0.052729	752	5	-1.5692	0.86779	0.88933	1	17526	1	-1.5692
ACTL6B	6	0.65725	0.78538	1	14459	2	0.14253	0.064613	0.17802	0.926907	3879	3	0.14253
ACTL7A	6	0.92012	0.92202	1	18293	1	0.29088	0.0056166	0.023997	0.782477	604	5	0.29088
ACTL7B	6	0.89638	0.90476	1	17778	1	0.18474	0.16357	0.35422	0.97149	7418	3	0.18474
ACTL8	6	0.59633	0.74246	1	13424	2	-0.035597	0.27623	0.48423	1	9805	3	-0.035597
ACTL9	6	0.19925	0.39424	1	6283	2	-0.12903	0.48387	0.67088	1	13257	2	-0.12903
ACTN1	6	0.15691	0.34385	1	5555	3	-0.10598	0.28826	0.49766	1	10042	3	-0.10598
ACTN2	6	0.35308	0.56875	1	9472	1	0.090213	0.10568	0.25919	0.952549	5506	2	0.090213
ACTN4	6	0.15166	0.33745	1	5477	3	-0.26915	0.20119	0.39849	0.986803	8244	2	-0.26915
ACTR10	6	0.072353	0.19321	1	3594	4	-0.5283	0.8291	0.87134	1	17111	1	-0.5283
ACTR1A	6	0.3191	0.53133	1	8701	2	0.061755	0.18053	0.37423	0.977937	7805	2	0.061755
ACTR1B	6	0.7075	0.82297	1	15341	2	-0.17336	0.2636	0.47001	1	9559	2	-0.17336
ACTR2	6	0.00013861	0.00075549	0.027728	559	5	-1.859	0.35598	0.57222	1	11413	1	-1.859
ACTR3	6	0.00065763	0.0034469	0.077231	915	4	-1.0311	0.59703	0.74432	1	14636	2	-1.0311
ACTR3B	6	0.014482	0.054323	0.533117	2085	4	-0.58615	0.63552	0.7708	1	15098	2	-0.58615
ACTR3C	6	0.12362	0.29261	1	4832	4	-0.21884	0.91986	0.9223	1	18227	1	-0.21884
ACTR5	6	0.019113	0.069361	0.620738	2285	4	-0.44724	0.83128	0.87224	1	17139	1	-0.44724
ACTR6	6	0.0022647	0.011251	0.182664	1269	5	-0.37674	0.94938	0.94943	1	18859	0	-0.37674
ACTR8	6	0.011935	0.045815	0.479438	1958	5	-0.51468	0.74369	0.84133	1	16405	1	-0.51468
ACTRT1	6	0.53213	0.69931	1	12369	2	-0.07312	0.55501	0.71624	1	14105	2	-0.07312
ACTRT2	6	0.35769	0.57368	1	9573	3	0.014645	0.15943	0.34927	0.97149	7313	3	0.014645
ACTRT3	6	0.037158	0.11847	0.856543	2819	3	-0.34209	0.45597	0.65383	1	12913	2	-0.34209
ACVR1	6	0.12832	0.3013	1	4952	4	-0.19665	0.29698	0.50736	1	10226	1	-0.19665
ACVR1B	6	0.95824	0.95818	1	19353	0	0.19996	0.13772	0.31857	0.964185	6719	3	0.19996
ACVR1C	6	0.93482	0.93503	1	18676	1	0.29851	0.0091339	0.036439	0.805857	923	3	0.29851
ACVR2A	6	0.65381	0.78294	1	14400	2	0.28012	0.072861	0.19474	0.933041	4229	4	0.28012
ACVR2B	6	0.21299	0.41028	1	6544	2	0.082583	0.121	0.28788	0.953687	6127	2	0.082583
ACVRL1	6	0.62282	0.76096	1	13833	1	0.35071	0.0088944	0.0356	0.800126	905	5	0.35071
ACY1	6	0.13206	0.3082	1	5051	4	-0.57835	0.82152	0.86825	1	17040	1	-0.57835
ACY3	6	0.36543	0.58214	1	9760	2	-0.051198	0.62215	0.76162	1	14934	2	-0.051198
ACYP1	5	0.94175	0.94193	1	18856	0	0.17635	0.13868	0.29026	0.954104	6758	2	0.17635
ACYP2	6	0.16088	0.34865	1	5618	2	0.11848	0.6637	0.79077	1	15446	2	0.11848
ADA	6	0.69178	0.81098	1	15041	2	0.0045347	0.70458	0.82091	1	15999	2	0.0045347
ADAD1	6	0.71048	0.82522	1	15401	2	-0.022366	0.56485	0.72267	1	14229	2	-0.022366
ADAD2	6	0.46755	0.65806	1	11466	2	0.075946	0.30968	0.52156	1	10478	3	0.075946
ADAL	6	0.99261	0.99268	1	20446	0	0.23572	0.24571	0.44949	0.997892	9173	3	0.23572
ADAM10	6	0.31995	0.5323	1	8718	2	0.25805	0.027193	0.094544	0.88103	2167	3	0.25805
ADAM11	6	0.69	0.80967	1	15011	1	0.066514	0.71784	0.8309	1	16185	2	0.066514
ADAM12	6	0.25515	0.45906	1	7335	2	0.20559	0.12353	0.29256	0.9549	6221	4	0.20559
ADAM15	6	0.086766	0.222	1	3948	2	0.23945	0.0054293	0.023305	0.782477	584	3	0.23945
ADAM17	6	0.87205	0.89012	1	17358	1	0.31953	0.054486	0.15688	0.919011	3445	4	0.31953
ADAM18	6	0.17564	0.3663	1	5855	3	-0.21464	0.75131	0.84367	1	16456	1	-0.21464
ADAM19	6	0.34338	0.55807	1	9250	3	-0.23017	0.3698	0.58713	1	11688	1	-0.23017
ADAM2	6	0.88832	0.89955	1	17620	1	0.11282	0.088443	0.22577	0.940938	4859	3	0.11282
ADAM20	6	0.96216	0.96214	1	19479	0	0.19375	0.065688	0.1802	0.926907	3930	4	0.19375
ADAM21	6	0.88784	0.89927	1	17612	1	0.14417	0.39798	0.61727	1	12241	2	0.14417
ADAM22	6	0.79209	0.85469	1	16279	1	0.25744	0.0017133	0.0086241	0.746113	233	3	0.25744
ADAM23	6	0.89474	0.90368	1	17750	1	0.074586	0.63345	0.76939	1	15072	2	0.074586
ADAM28	6	0.41757	0.62741	1	10765	2	-0.072631	0.94972	0.94975	1	18869	0	-0.072631
ADAM29	6	0.64073	0.77354	1	14184	2	0.082236	0.11034	0.268	0.95295	5700	3	0.082236
ADAM30	6	0.5532	0.71318	1	12689	2	0.37616	0.04018	0.12604	0.904688	2808	4	0.37616
ADAM32	6	0.29503	0.5043	1	8162	2	-0.091474	0.12791	0.30064	0.956978	6379	2	-0.091474
ADAM33	6	0.25396	0.45766	1	7319	3	-0.23623	0.21874	0.41862	0.99055	8619	2	-0.23623
ADAM7	6	0.11519	0.27689	1	4614	3	-0.39614	0.11244	0.27194	0.953687	5768	2	-0.39614
ADAM8	6	0.18126	0.37297	1	5950	2	0.066391	0.097933	0.24436	0.948582	5209	2	0.066391
ADAM9	6	0.98768	0.98776	1	20277	0	0.32238	0.024708	0.087017	0.879085	1998	5	0.32238
ADAMDEC1	6	0.64247	0.77478	1	14210	2	0.11185	0.59474	0.74278	1	14607	1	0.11185
ADAMTS1	6	0.92521	0.92631	1	18415	1	0.053359	0.12705	0.29905	0.956978	6341	3	0.053359
ADAMTS10	6	0.98383	0.98397	1	20141	0	0.066338	0.85495	0.88294	1	17386	1	0.066338
ADAMTS12	6	0.59227	0.73966	1	13353	2	0.27552	0.17449	0.36715	0.975681	7671	3	0.27552
ADAMTS13	6	0.45128	0.64804	1	11231	2	0.10129	0.19494	0.39115	0.984709	8109	3	0.10129
ADAMTS14	6	0.30424	0.51466	1	8379	2	0.10242	0.29281	0.50277	1	10135	3	0.10242
ADAMTS15	6	0.20135	0.39678	1	6321	1	0.316	0.1064	0.26053	0.952549	5532	4	0.316
ADAMTS16	6	0.39359	0.61261	1	10412	3	-0.10828	0.43669	0.64214	1	12714	2	-0.10828
ADAMTS17	6	0.32551	0.53842	1	8850	3	-0.21176	0.59554	0.74334	1	14616	2	-0.21176
ADAMTS18	6	0.23038	0.43043	1	6859	3	-0.24508	0.30363	0.5148	1	10361	2	-0.24508
ADAMTS19	6	0.85414	0.88087	1	17058	1	0.38928	0.012196	0.046746	0.82295	1145	4	0.38928
ADAMTS2	6	0.63847	0.77196	1	14136	2	0.53371	0.012685	0.048421	0.82295	1189	4	0.53371
ADAMTS20	6	0.049829	0.14616	0.960803	3090	4	-0.49531	0.33092	0.54503	1	10917	1	-0.49531
ADAMTS3	6	0.28983	0.49848	1	8063	3	-0.15929	0.97697	0.97708	1	19442	0	-0.15929
ADAMTS4	6	0.27237	0.47873	1	7702	2	-0.042931	0.069228	0.18739	0.927336	4111	2	-0.042931
ADAMTS5	6	0.51548	0.6884	1	12127	2	0.21241	0.0065963	0.027573	0.788145	688	3	0.21241
ADAMTS6	6	0.39178	0.6107	1	10364	1	0.060533	0.11648	0.27952	0.953687	5943	3	0.060533
ADAMTS7	6	0.21796	0.41602	1	6637	2	-0.013096	0.10584	0.25949	0.952549	5510	2	-0.013096
ADAMTS8	6	0.98613	0.98626	1	20234	0	0.13746	0.14701	0.33425	0.968054	7030	3	0.13746
ADAMTS9	6	0.70103	0.81804	1	15219	2	0.11473	0.3589	0.57538	1	11480	2	0.11473
ADAMTSL1	6	0.62644	0.76346	1	13921	2	0.2014	0.053558	0.1549	0.919011	3403	4	0.2014
ADAMTSL2	6	0.84046	0.87435	1	16857	1	0.094643	0.24644	0.4503	0.997959	9189	3	0.094643
ADAMTSL3	6	0.294	0.50316	1	8132	3	-0.14199	0.30909	0.5209	1	10470	2	-0.14199
ADAMTSL4	6	0.83714	0.87286	1	16813	1	0.052839	0.80222	0.86071	1	16870	1	0.052839
ADAMTSL5	6	0.15782	0.34494	1	5567	3	-0.22435	0.28972	0.49933	1	10066	2	-0.22435
ADAP1	6	0.92001	0.92192	1	18287	1	0.28599	0.041468	0.12889	0.905155	2867	4	0.28599
ADAP2	6	0.54041	0.70474	1	12496	2	-0.10453	0.47492	0.66538	1	13149	1	-0.10453
ADAR	6	0.32994	0.54335	1	8957	3	-0.068228	0.42992	0.63812	1	12627	2	-0.068228
ADARB1	6	0.2836	0.4914	1	7937	3	-0.0086665	0.030152	0.10352	0.888796	2363	3	-0.0086665
ADARB2	6	0.504	0.681	1	11973	2	0.17856	0.31285	0.5251	1	10546	3	0.17856
ADAT1	6	0.46183	0.65449	1	11378	2	0.23185	0.012581	0.04807	0.82295	1178	4	0.23185
ADAT2	6	0.073176	0.19486	1	3616	3	-0.1877	0.96026	0.96021	1	19072	0	-0.1877
ADAT3	6	0.0084394	0.033943	0.390038	1780	5	-0.54757	0.83557	0.8741	1	17180	1	-0.54757
ADC	6	0.60473	0.74822	1	13542	1	0.28507	0.042366	0.13081	0.905474	2918	4	0.28507
ADCK1	6	0.96544	0.96541	1	19584	0	0.30276	0.072913	0.19483	0.933041	4234	3	0.30276
ADCK2	6	0.58884	0.73723	1	13297	2	-0.16919	0.20526	0.40316	0.98778	8326	1	-0.16919
ADCK3	6	0.91874	0.9209	1	18252	1	0.10628	0.60103	0.74701	1	14682	2	0.10628
ADCK4	6	0.9659	0.96588	1	19595	0	0.19692	0.10997	0.26729	0.95295	5688	4	0.19692
ADCK5	6	0.22757	0.42721	1	6804	2	-0.10167	0.97141	0.97145	1	19308	0	-0.10167
ADCY1	6	0.61343	0.75433	1	13680	2	-0.016301	0.61376	0.75576	1	14824	2	-0.016301
ADCY10	6	0.99159	0.99165	1	20411	0	0.6071	0.0013107	0.0066942	0.738121	174	4	0.6071
ADCY2	6	0.71152	0.82602	1	15413	1	0.052352	0.32936	0.54333	1	10890	3	0.052352
ADCY3	6	0.012426	0.047448	0.489618	1983	3	-0.061105	0.17774	0.37096	0.976713	7747	3	-0.061105
ADCY4	6	0.0028038	0.013576	0.20694	1344	5	-0.55975	0.3862	0.60481	1	11996	1	-0.55975
ADCY5	6	0.86031	0.88396	1	17159	1	0.19287	0.12609	0.2973	0.956978	6301	4	0.19287
ADCY6	6	0.31777	0.52983	1	8674	2	0.095012	0.63704	0.77187	1	15117	2	0.095012
ADCY7	6	0.53589	0.70171	1	12427	2	-0.0037068	0.020569	0.074041	0.878761	1709	2	-0.0037068
ADCY8	6	0.25927	0.46381	1	7411	3	-0.008686	0.022619	0.080466	0.878761	1851	2	-0.008686
ADCY9	6	0.34974	0.56509	1	9407	3	-0.15247	0.38391	0.60233	1	11948	2	-0.15247
ADCYAP1	6	0.98565	0.98579	1	20210	0	0.41716	0.018103	0.066168	0.864696	1564	4	0.41716
ADCYAP1R1	6	0.52447	0.69419	1	12250	2	0.074367	0.31524	0.52776	1	10590	3	0.074367
ADD1	6	0.30994	0.52107	1	8489	2	0.035711	0.54272	0.70829	1	13967	2	0.035711
ADD2	6	0.99678	0.99684	1	20582	0	0.26247	0.015358	0.05727	0.836024	1387	5	0.26247
ADD3	6	0.95094	0.95099	1	19128	0	0.40597	0.061547	0.1717	0.926907	3748	4	0.40597
ADH1A	6	0.72233	0.83219	1	15596	1	0.039322	0.65648	0.78556	1	15344	2	0.039322
ADH1B	6	0.88668	0.89856	1	17588	1	0.19899	0.079615	0.20825	0.936355	4515	4	0.19899
ADH4	6	0.15083	0.33644	1	5466	1	0.13671	0.32292	0.53623	1	10750	3	0.13671
ADH5	6	0.11196	0.27081	1	4539	4	-0.34072	0.45824	0.65518	1	12936	1	-0.34072
ADH6	6	0.36388	0.58047	1	9718	3	-0.15047	0.23923	0.44206	0.996252	9032	1	-0.15047
ADH7	6	0.36769	0.58458	1	9817	3	-0.039177	0.57175	0.7273	1	14305	2	-0.039177
ADHFE1	6	0.62848	0.76488	1	13953	2	0.020073	0.83645	0.87448	1	17190	1	0.020073
ADI1	6	0.9211	0.92284	1	18315	1	0.75134	7.91e-05	0.00041493	0.456683	17	5	0.75134
ADIG	6	0.29851	0.50817	1	8263	3	-0.034465	0.16435	0.35514	0.97149	7443	3	-0.034465
ADIPOQ	6	0.15815	0.34534	1	5574	3	-0.18691	0.43622	0.64188	1	12710	1	-0.18691
ADIPOR1	6	0.014122	0.053109	0.526323	2067	4	-0.91289	0.85601	0.88347	1	17392	1	-0.91289
ADIPOR2	6	0.64487	0.77656	1	14244	2	0.046014	0.16845	0.36	0.973361	7535	3	0.046014
ADIRF	6	0.39737	0.61534	1	10473	2	0.10205	0.32804	0.5419	1	10860	3	0.10205
ADK	6	0.68272	0.80423	1	14890	2	-0.098988	0.47012	0.66246	1	13085	2	-0.098988
ADM	6	0.54504	0.70778	1	12572	2	0.50399	0.00073498	0.003854	0.656017	117	4	0.50399
ADM2	5	0.79762	0.82515	1	16338	1	0.1803	0.40556	0.57795	1	12360	2	0.1803
ADM5	6	0.2993	0.50909	1	8285	2	-0.029165	0.24585	0.44965	0.997892	9176	2	-0.029165
ADNP	6	0.99352	0.99359	1	20475	0	0.18861	0.3323	0.54653	1	10945	3	0.18861
ADNP2	6	0.017031	0.062641	0.581992	2204	3	-0.50535	0.62935	0.76651	1	15015	1	-0.50535
ADO	6	0.013704	0.05173	0.516799	2052	4	-0.61251	0.6645	0.79135	1	15462	2	-0.61251
ADORA1	6	0.94887	0.94891	1	19072	0	0.16578	0.073612	0.19626	0.934372	4261	3	0.16578
ADORA2A	6	0.6499	0.78019	1	14331	1	0.17671	0.023674	0.083796	0.878761	1921	3	0.17671
ADORA2B	6	0.10267	0.2532	1	4327	4	-0.27373	0.90433	0.91099	1	17999	1	-0.27373
ADORA3	6	0.31502	0.52677	1	8604	3	-0.15916	0.19643	0.39288	0.985316	8143	2	-0.15916
ADPGK	6	0.51937	0.69089	1	12180	2	0.060284	0.38017	0.59827	1	11879	3	0.060284
ADPRH	6	0.50666	0.68272	1	12007	2	-0.15504	0.14699	0.33423	0.968054	7029	2	-0.15504
ADPRHL1	6	0.67109	0.79564	1	14691	2	-0.024229	0.729	0.83705	1	16309	1	-0.024229
ADPRHL2	6	0.7503	0.84053	1	15826	1	-0.044061	0.9294	0.93026	1	18417	1	-0.044061
ADPRM	6	0.30689	0.51766	1	8431	2	0.21034	0.11574	0.27812	0.953687	5912	4	0.21034
ADRA1A	6	0.20246	0.3981	1	6351	3	-0.24568	0.46977	0.66225	1	13081	2	-0.24568
ADRA1B	6	0.87882	0.89391	1	17461	1	0.24251	0.04091	0.12766	0.905155	2837	4	0.24251
ADRA1D	6	0.97446	0.97455	1	19846	0	0.27474	0.024081	0.085073	0.878761	1951	5	0.27474
ADRA2A	6	0.99878	0.99877	1	20646	0	0.63715	0.001223	0.0062627	0.738121	167	6	0.63715
ADRA2B	6	0.86672	0.88729	1	17261	1	0.13287	0.22768	0.42897	0.992865	8805	3	0.13287
ADRA2C	6	0.13135	0.30688	1	5036	3	-0.16288	0.94673	0.94677	1	18781	0	-0.16288
ADRB1	6	0.68286	0.80433	1	14896	2	-0.037851	0.82752	0.87068	1	17094	1	-0.037851
ADRB2	6	0.49055	0.67246	1	11778	1	0.46854	0.0058909	0.025004	0.788145	633	5	0.46854
ADRB3	6	0.24852	0.45124	1	7217	1	0.0057972	0.90538	0.9117	1	18013	1	0.0057972
ADRBK1	6	0.05333	0.15371	0.980239	3180	4	-0.38068	0.95008	0.95012	1	18876	0	-0.38068
ADRBK2	6	0.30393	0.51429	1	8370	3	-0.043527	0.53305	0.70199	1	13823	2	-0.043527
ADRM1	5	0.0079512	0.031249	0.369728	1753	2	-0.11397	0.20607	0.38567	0.983567	8349	2	-0.11397
ADSL	6	1.29e-05	8.39e-05	0.006785	255	4	-1.8123	0.64527	0.77769	1	15213	2	-1.8123
ADSS	6	0.010362	0.04059	0.441979	1884	3	-0.16696	0.39864	0.61799	1	12257	2	-0.16696
ADSSL1	6	0.97872	0.97886	1	19978	0	0.20962	0.12014	0.28632	0.953687	6092	3	0.20962
ADTRP	6	0.72041	0.83165	1	15572	1	0.17935	0.046316	0.13941	0.909154	3087	3	0.17935
AEBP1	6	0.17835	0.3695	1	5895	3	-0.11965	0.52179	0.6947	1	13676	2	-0.11965
AEBP2	6	0.13486	0.31335	1	5135	2	0.018573	0.6703	0.79562	1	15547	2	0.018573
AEN	6	0.46079	0.65385	1	11360	1	-0.16105	0.92254	0.92444	1	18290	1	-0.16105
AES	6	0.083619	0.21575	1	3874	4	-0.34825	0.40125	0.62071	1	12314	2	-0.34825
AFAP1	6	0.46559	0.65688	1	11448	1	0.20599	0.085212	0.21938	0.938962	4731	3	0.20599
AFAP1L1	6	0.93101	0.93143	1	18566	1	0.25847	0.016762	0.061805	0.848946	1482	3	0.25847
AFAP1L2	6	0.6505	0.78062	1	14343	2	0.22915	0.083458	0.21589	0.937927	4662	4	0.22915
AFF1	6	0.43412	0.63745	1	10991	2	-0.053061	0.92537	0.92681	1	18341	1	-0.053061
AFF2	6	0.70039	0.81755	1	15208	1	-0.022057	0.18424	0.37858	0.981063	7876	2	-0.022057
AFF3	6	0.0076462	0.031178	0.369217	1729	3	-0.30118	0.9602	0.96015	1	19071	0	-0.30118
AFF4	6	0.4976	0.67696	1	11882	2	0.1431	0.094468	0.23759	0.948582	5059	3	0.1431
AFG3L2	6	0.23637	0.43731	1	6985	2	0.42768	0.010469	0.041034	0.816813	1020	4	0.42768
AFM	6	0.31932	0.53157	1	8704	1	0.17956	0.11374	0.2744	0.953687	5831	3	0.17956
AFMID	6	0.31936	0.53162	1	8706	2	0.16498	0.26351	0.46992	1	9557	3	0.16498
AFP	6	0.96697	0.96694	1	19627	0	0.094758	0.21352	0.41268	0.988622	8514	3	0.094758
AFTPH	6	0.12144	0.28853	1	4774	2	0.04931	0.73604	0.8391	1	16347	1	0.04931
AGA	6	0.66278	0.78944	1	14554	1	0.41303	0.010067	0.039667	0.812698	994	4	0.41303
AGAP1	6	0.96714	0.96712	1	19629	0	0.58321	0.00048319	0.0025444	0.593014	85	5	0.58321
AGAP11	6	0.31135	0.52268	1	8517	1	0.30942	0.057249	0.16276	0.925351	3565	4	0.30942
AGAP2	6	0.59352	0.7405	1	13373	2	0.14058	0.31789	0.5307	1	10638	3	0.14058
AGAP3	6	0.10996	0.26705	1	4495	4	-0.29222	0.059358	0.16714	0.926805	3663	2	-0.29222
AGAP4	6	1.22e-05	8.01e-05	0.006607	250	6	-1.7186	0.99999	0.99999	1	20596	0	-1.7186
AGAP5	3	0.032939	0.082059	0.689935	2740	2	-1.0016	0.63202	0.64857	1	15056	1	-1.0016
AGAP6	4	0.55416	0.65545	1	12709	1	-0.13963	0.8305	0.83107	1	17132	1	-0.13963
AGAP9	2	0.02716	0.049743	0.503569	2582	2	-1.0275	0.97284	0.97299	1	19351	0	-1.0275
AGBL1	6	0.19488	0.38909	1	6195	2	0.1395	0.095956	0.24056	0.948582	5127	3	0.1395
AGBL2	6	0.90745	0.91238	1	17992	1	0.1475	0.19044	0.38588	0.983567	8008	3	0.1475
AGBL3	6	0.96957	0.96959	1	19719	0	0.21861	0.087659	0.22418	0.940208	4828	3	0.21861
AGBL4	6	0.64177	0.77429	1	14197	1	0.42372	0.0077079	0.031518	0.788145	798	4	0.42372
AGBL5	6	0.91797	0.92027	1	18236	1	0.066622	0.35273	0.56876	1	11346	2	0.066622
AGER	6	0.9531	0.95317	1	19207	0	0.30878	0.020984	0.075314	0.878761	1731	5	0.30878
AGFG1	6	0.028012	0.097049	0.757506	2611	4	-0.65009	0.95062	0.95068	1	18882	0	-0.65009
AGFG2	6	0.68029	0.8024	1	14843	2	-0.096243	0.86217	0.8865	1	17472	1	-0.096243
AGGF1	6	0.50279	0.68023	1	11957	2	0.024165	0.74614	0.8421	1	16420	1	0.024165
AGK	6	0.18786	0.38081	1	6076	3	-0.10893	0.40287	0.62213	1	12333	2	-0.10893
AGL	6	0.97725	0.97736	1	19934	0	0.17326	0.36271	0.5795	1	11553	3	0.17326
AGMAT	6	0.66351	0.78997	1	14570	2	-0.0073736	0.9331	0.93352	1	18486	1	-0.0073736
AGMO	6	0.96092	0.96088	1	19442	0	0.080483	0.70115	0.81836	1	15947	2	0.080483
AGO1	6	0.31656	0.5285	1	8644	2	-0.10875	0.19116	0.38672	0.983976	8024	2	-0.10875
AGO2	6	0.031898	0.10664	0.799815	2716	4	-0.55608	0.98583	0.98596	1	19720	0	-0.55608
AGO3	6	0.93212	0.93246	1	18593	1	0.1895	0.10824	0.26399	0.952549	5618	4	0.1895
AGO4	6	0.67917	0.80157	1	14826	1	0.23018	0.13045	0.30534	0.957333	6474	4	0.23018
AGPAT1	6	0.34078	0.55524	1	9182	2	0.040874	0.50625	0.68484	1	13507	2	0.040874
AGPAT2	6	0.25847	0.46288	1	7397	3	-0.2442	0.97964	0.9798	1	19542	0	-0.2442
AGPAT3	6	0.6706	0.79527	1	14685	2	0.091877	0.32421	0.53769	1	10781	3	0.091877
AGPAT4	6	0.70676	0.82241	1	15320	2	-0.084039	0.40757	0.62488	1	12393	2	-0.084039
AGPAT5	6	0.9884	0.9885	1	20299	0	0.25915	0.091156	0.23113	0.94617	4939	4	0.25915
AGPAT6	6	0.43453	0.63769	1	10995	2	0.146	0.0036471	0.016836	0.770387	437	3	0.146
AGPAT9	6	0.82756	0.86865	1	16690	1	0.19972	0.089337	0.22753	0.942102	4886	3	0.19972
AGPHD1	6	0.31495	0.52669	1	8603	3	-0.073868	0.38358	0.60198	1	11943	1	-0.073868
AGPS	6	0.27635	0.48325	1	7788	3	-0.15418	0.72342	0.83509	1	16260	2	-0.15418
AGR2	6	0.91648	0.9191	1	18203	1	0.3354	0.048717	0.14452	0.911616	3200	4	0.3354
AGR3	6	0.89182	0.9018	1	17686	1	0.23586	0.029799	0.10247	0.886149	2342	5	0.23586
AGRN	6	0.47585	0.66326	1	11577	2	0.206	0.24618	0.45001	0.997892	9184	3	0.206
AGRP	6	0.75926	0.8434	1	15923	1	0.11925	0.094336	0.23733	0.948582	5053	3	0.11925
AGT	6	0.40561	0.62025	1	10583	2	0.28432	0.039526	0.1246	0.903371	2784	3	0.28432
AGTPBP1	6	0.43012	0.63501	1	10933	1	0.31609	0.021546	0.077087	0.878761	1767	4	0.31609
AGTR1	6	0.90839	0.91303	1	18014	1	0.23233	0.0644	0.17758	0.926907	3872	4	0.23233
AGTR2	6	0.9641	0.96407	1	19539	0	0.22938	0.12517	0.29557	0.956445	6280	3	0.22938
AGTRAP	6	0.2338	0.4343	1	6937	2	-0.1145	0.16999	0.36184	0.973879	7572	1	-0.1145
AGXT	6	0.77664	0.84922	1	16089	1	0.39319	0.059642	0.16772	0.926805	3676	4	0.39319
AGXT2	6	0.22718	0.42676	1	6798	2	0.17281	0.18812	0.38316	0.983012	7959	3	0.17281
AGXT2L1	6	0.94536	0.94543	1	18971	0	0.47977	0.022042	0.078667	0.878761	1806	4	0.47977
AGXT2L2	6	0.76951	0.8468	1	16024	1	0.17358	0.12111	0.28806	0.953687	6132	4	0.17358
AHCTF1	6	0.0027173	0.013277	0.203958	1332	4	-0.85632	0.96558	0.96555	1	19174	0	-0.85632
AHCY	6	2.52e-07	3.11e-06	0.001326	46	6	-1.6987	1	1	1	20640	0	-1.6987
AHCYL1	6	0.91494	0.9179	1	18167	1	-0.10639	0.49597	0.67842	1	13392	2	-0.10639
AHCYL2	6	0.38196	0.60005	1	10142	3	-0.13318	0.77334	0.85073	1	16621	1	-0.13318
AHDC1	6	0.94512	0.94519	1	18964	0	-0.028327	0.69838	0.81629	1	15905	1	-0.028327
AHI1	6	0.35747	0.57346	1	9565	2	-0.011559	0.37075	0.58814	1	11705	1	-0.011559
AHNAK	6	0.29066	0.4994	1	8083	2	-0.013445	0.75788	0.84571	1	16496	1	-0.013445
AHNAK2	6	0.39062	0.60945	1	10341	3	0.1348	0.16075	0.35085	0.97149	7338	3	0.1348
AHR	6	0.44507	0.64419	1	11147	2	0.31799	0.17697	0.37005	0.976323	7726	3	0.31799
AHRR	6	0.033775	0.1109	0.819356	2757	4	-0.76695	0.90286	0.90996	1	17973	1	-0.76695
AHSA1	6	0.95413	0.95419	1	19235	0	0.23955	0.022506	0.080104	0.878761	1840	3	0.23955
AHSA2	6	0.37721	0.59492	1	10028	2	0.15003	0.10883	0.26512	0.952549	5640	3	0.15003
AHSG	6	0.20028	0.39547	1	6302	3	-0.40156	0.17114	0.3632	0.974737	7591	2	-0.40156
AHSP	6	0.21791	0.41596	1	6634	3	-0.1166	0.36376	0.58065	1	11573	3	-0.1166
AICDA	6	0.43709	0.63923	1	11029	2	0.18979	0.047251	0.14142	0.910154	3136	3	0.18979
AIDA	6	0.9775	0.97763	1	19941	0	0.235	0.11859	0.28341	0.953687	6034	3	0.235
AIF1	6	0.27657	0.4835	1	7796	3	-0.091734	0.21388	0.41309	0.988622	8521	2	-0.091734
AIF1L	6	0.51431	0.68764	1	12115	2	-0.17435	0.87973	0.89574	1	17647	1	-0.17435
AIFM1	6	5.31e-09	2.39e-07	0.000236	12	6	-2.1252	0.99998	0.99998	1	20584	0	-2.1252
AIFM2	6	0.19466	0.38883	1	6189	3	-0.18146	0.38969	0.60854	1	12064	3	-0.18146
AIFM3	6	0.19495	0.38918	1	6197	3	-0.22099	0.81503	0.86565	1	16977	1	-0.22099
AIG1	6	0.42271	0.63056	1	10835	1	-0.012718	0.73261	0.83811	1	16328	1	-0.012718
AIM1	6	0.58276	0.73306	1	13184	2	0.0019727	0.43689	0.64225	1	12718	2	0.0019727
AIM2	6	0.51975	0.69114	1	12185	2	-0.001483	0.6907	0.81054	1	15800	2	-0.001483
AIMP1	6	0.44856	0.64635	1	11200	2	0.19404	0.079369	0.20777	0.936355	4503	3	0.19404
AIMP2	6	0.64687	0.77798	1	14281	1	0.089952	0.0030028	0.014446	0.762844	375	3	0.089952
AIP	6	0.071636	0.19171	1	3581	4	-0.21222	0.56372	0.72193	1	14220	1	-0.21222
AIPL1	6	0.26027	0.46498	1	7432	3	-0.2285	0.10762	0.26281	0.952549	5586	2	-0.2285
AIRE	6	0.26075	0.46555	1	7444	2	0.17887	0.23128	0.43304	0.994058	8875	3	0.17887
AJAP1	6	0.25915	0.46367	1	7408	2	-0.008647	0.53662	0.70428	1	13875	2	-0.008647
AJUBA	6	0.22967	0.4296	1	6848	3	-0.24985	0.65389	0.78375	1	15309	2	-0.24985
AK1	6	0.57395	0.7271	1	13024	2	-0.073867	0.10734	0.26231	0.952549	5572	1	-0.073867
AK2	6	0.1159	0.27823	1	4637	2	-0.068168	0.97056	0.97057	1	19291	0	-0.068168
AK3	6	0.1371	0.31741	1	5196	3	-0.16424	0.74699	0.84236	1	16425	1	-0.16424
AK4	6	0.20907	0.40569	1	6475	2	-0.10418	0.2607	0.46677	1	9490	2	-0.10418
AK5	6	0.023671	0.083763	0.6969	2456	5	-0.24512	0.94578	0.94583	1	18755	0	-0.24512
AK6	6	1.38e-06	9.81e-06	0.001879	103	6	-4.4927	1	1	1	20656	0	-4.4927
AK7	6	0.56983	0.72434	1	12966	1	-0.026962	0.062396	0.17347	0.926907	3787	2	-0.026962
AK8	6	0.2267	0.42619	1	6791	3	0.071531	0.03216	0.10816	0.891489	2461	3	0.071531
AK9	6	0.38821	0.60685	1	10287	1	0.15855	0.16218	0.35255	0.97149	7381	3	0.15855
AKAP1	6	0.14037	0.32333	1	5292	3	-0.14062	0.26851	0.47561	1	9661	1	-0.14062
AKAP10	6	0.26047	0.46522	1	7437	1	0.1749	0.22647	0.42754	0.992865	8771	3	0.1749
AKAP11	6	0.58304	0.73325	1	13189	2	0.10229	0.34128	0.55627	1	11117	3	0.10229
AKAP12	6	0.030409	0.10324	0.783992	2685	3	-0.20607	0.13379	0.31143	0.960485	6584	3	-0.20607
AKAP13	6	0.81741	0.86444	1	16556	1	0.19148	0.030234	0.10376	0.888875	2368	3	0.19148
AKAP14	6	0.57597	0.72847	1	13058	2	0.091622	0.34064	0.55559	1	11106	3	0.091622
AKAP17A_X	6	0.35499	0.5708	1	9516	2	0.17433	0.070415	0.18981	0.928993	4150	3	0.17433
AKAP2	6	0.32364	0.53635	1	8808	3	-0.14526	0.28598	0.49512	1	9998	2	-0.14526
AKAP3	6	0.10282	0.25348	1	4330	3	-0.23308	0.88327	0.89778	1	17698	1	-0.23308
AKAP4	6	0.96073	0.96069	1	19436	0	0.088608	0.38798	0.60671	1	12032	3	0.088608
AKAP5	6	0.80768	0.86052	1	16460	1	0.4002	0.012155	0.046615	0.82295	1141	5	0.4002
AKAP6	6	0.38913	0.60787	1	10307	1	0.19449	0.078209	0.20552	0.93617	4458	3	0.19449
AKAP7	6	0.65116	0.78111	1	14350	2	-0.02687	0.080939	0.21083	0.936766	4562	1	-0.02687
AKAP8	6	0.22752	0.42715	1	6802	3	-0.21762	0.11741	0.28122	0.953687	5983	2	-0.21762
AKAP8L	6	0.076046	0.20069	1	3692	3	-0.020384	0.30042	0.51123	1	10298	3	-0.020384
AKAP9	6	0.90658	0.91174	1	17975	1	0.19225	0.025152	0.08832	0.879085	2026	3	0.19225
AKIP1	6	0.32707	0.54018	1	8892	3	-0.15491	0.19693	0.39346	0.985485	8152	2	-0.15491
AKIRIN1	6	0.95349	0.95357	1	19220	0	0.18364	0.13684	0.31698	0.962842	6691	3	0.18364
AKIRIN2	6	0.063643	0.1754	1	3401	3	-0.26174	0.34315	0.55833	1	11160	2	-0.26174
AKNA	6	0.021956	0.078358	0.669977	2393	5	-0.31374	0.75109	0.84359	1	16455	1	-0.31374
AKNAD1	6	0.71564	0.82916	1	15501	1	0.35715	0.071706	0.19241	0.931206	4199	4	0.35715
AKR1A1	6	0.35464	0.5704	1	9509	3	0.23968	0.0098872	0.039089	0.812698	978	3	0.23968
AKR1B1	6	0.23397	0.4345	1	6939	3	-0.099812	0.67561	0.79947	1	15610	2	-0.099812
AKR1B10	6	0.57532	0.72803	1	13050	2	-0.070702	0.13382	0.31149	0.960485	6588	2	-0.070702
AKR1B15	6	0.18577	0.37834	1	6033	2	0.2801	0.056575	0.16135	0.924672	3536	4	0.2801
AKR1C1	6	0.80238	0.85844	1	16396	1	0.28526	0.033917	0.11215	0.896629	2540	3	0.28526
AKR1C2	5	0.95552	0.95566	1	19272	0	0.32543	0.1588	0.31935	0.964265	7301	3	0.32543
AKR1C3	6	0.61818	0.7577	1	13759	1	0.083397	0.32839	0.54228	1	10866	2	0.083397
AKR1C4	6	0.98736	0.98743	1	20270	0	0.33287	0.029314	0.10103	0.88579	2310	4	0.33287
AKR1D1	6	0.78717	0.8529	1	16227	1	-0.027026	0.94907	0.94912	1	18851	0	-0.027026
AKR1E2	6	0.39351	0.61252	1	10406	2	0.032072	0.43216	0.63943	1	12649	2	0.032072
AKR7A2	6	0.075052	0.19865	1	3662	4	-0.20885	0.97178	0.97184	1	19316	0	-0.20885
AKR7A3	6	0.95172	0.95179	1	19160	0	0.39311	0.010741	0.04194	0.818644	1039	4	0.39311
AKT1	6	0.98475	0.9849	1	20183	0	0.13868	0.23364	0.43569	0.994535	8929	3	0.13868
AKT1S1	6	0.29722	0.50672	1	8231	3	-0.044745	0.689	0.80927	1	15774	2	-0.044745
AKT2	6	0.0021185	0.010553	0.173918	1249	4	-0.53095	0.9701	0.9701	1	19279	0	-0.53095
AKT3	6	0.96832	0.9683	1	19674	0	0.16491	0.61963	0.75988	1	14899	2	0.16491
AKTIP	6	0.87344	0.89089	1	17379	1	0.29782	0.043199	0.13263	0.906278	2951	4	0.29782
ALAD	6	0.00010044	0.00054408	0.022302	505	5	-0.87769	0.99419	0.99423	1	20008	0	-0.87769
ALAS1	6	0.0071638	0.029473	0.35615	1697	5	-0.58186	0.9922	0.99228	1	19939	0	-0.58186
ALAS2	6	0.6435	0.77554	1	14224	2	0.045798	0.31313	0.52539	1	10553	3	0.045798
ALB	6	0.62503	0.76251	1	13885	2	0.0050929	0.33138	0.54553	1	10924	2	0.0050929
ALCAM	6	0.37237	0.58962	1	9921	3	-0.016626	0.31106	0.52313	1	10506	3	-0.016626
ALDH16A1	6	0.022459	0.079928	0.679156	2407	3	-0.32644	0.62142	0.7611	1	14927	2	-0.32644
ALDH18A1	6	0.80578	0.85979	1	16439	1	0.27403	0.10293	0.25395	0.952133	5407	3	0.27403
ALDH1A1	6	0.63452	0.76916	1	14070	2	0.16459	0.081437	0.21187	0.937757	4580	3	0.16459
ALDH1A2	6	0.49358	0.6744	1	11826	1	0.23479	0.0091136	0.036373	0.805857	919	3	0.23479
ALDH1A3	6	0.21518	0.4128	1	6587	3	-0.33535	0.61154	0.75421	1	14796	1	-0.33535
ALDH1B1	6	0.10076	0.24956	1	4282	4	-0.23091	0.28689	0.49616	1	10015	2	-0.23091
ALDH1L1	6	0.83229	0.87067	1	16746	1	0.20755	0.096038	0.24072	0.948582	5132	4	0.20755
ALDH1L2	6	0.5773	0.72936	1	13084	2	0.012798	0.021497	0.076951	0.878761	1763	2	0.012798
ALDH2	6	0.16856	0.35784	1	5735	2	0.17179	0.1433	0.32858	0.967079	6919	4	0.17179
ALDH3A1	6	0.37265	0.58992	1	9928	3	-0.16038	0.47724	0.66684	1	13182	1	-0.16038
ALDH3A2	6	0.97513	0.97524	1	19867	0	0.19921	0.12036	0.2867	0.953687	6100	3	0.19921
ALDH3B1	6	0.5296	0.69764	1	12321	2	0.11982	0.66228	0.78974	1	15432	2	0.11982
ALDH3B2	6	0.46588	0.65705	1	11452	2	0.045115	0.66645	0.79279	1	15491	2	0.045115
ALDH4A1	6	0.16621	0.35506	1	5699	3	-0.25094	0.47049	0.66268	1	13093	1	-0.25094
ALDH5A1	6	0.34561	0.56051	1	9304	3	-0.18762	0.16406	0.3548	0.97149	7432	1	-0.18762
ALDH6A1	6	0.69995	0.81722	1	15194	1	0.21085	0.10018	0.24873	0.948723	5310	4	0.21085
ALDH7A1	6	0.87963	0.89437	1	17476	1	-0.062828	0.084976	0.21893	0.938962	4722	2	-0.062828
ALDH8A1	6	0.22169	0.42028	1	6705	3	-0.073966	0.026046	0.091068	0.879085	2088	3	-0.073966
ALDH9A1	6	0.95875	0.95871	1	19364	0	0.38924	0.017726	0.064945	0.862296	1536	5	0.38924
ALDOA	6	3.13e-06	2.37e-05	0.003334	147	6	-1.6241	0.99989	0.99989	1	20516	0	-1.6241
ALDOB	6	0.89492	0.90378	1	17752	1	0.13995	0.0332	0.11052	0.894719	2510	3	0.13995
ALDOC	6	0.20742	0.40381	1	6443	3	-0.17131	0.0070114	0.029044	0.788145	730	2	-0.17131
ALG1	6	0.0021497	0.01071	0.175735	1255	5	-0.77743	0.98971	0.98981	1	19839	0	-0.77743
ALG10	6	0.25643	0.46054	1	7362	2	-0.059417	0.14059	0.32372	0.965844	6818	2	-0.059417
ALG10B	6	0.68885	0.80879	1	14988	2	0.065048	0.16914	0.36081	0.973868	7548	3	0.065048
ALG11	6	0.018943	0.068811	0.617417	2278	3	-0.11967	0.14818	0.33569	0.968054	7062	3	-0.11967
ALG12	6	0.33657	0.55062	1	9090	2	-0.010495	0.64969	0.78084	1	15262	2	-0.010495
ALG13	6	0.0042374	0.018851	0.261543	1477	3	-0.52925	0.73811	0.83968	1	16362	1	-0.52925
ALG14	6	0.0035268	0.01626	0.235542	1416	3	-0.49104	0.75529	0.84491	1	16480	1	-0.49104
ALG1L	6	0.12811	0.30091	1	4946	2	-0.054987	0.84702	0.87916	1	17298	1	-0.054987
ALG2	6	0.0014294	0.0072634	0.130968	1140	5	-0.99165	0.99488	0.99491	1	20044	0	-0.99165
ALG3	6	0.62293	0.76103	1	13841	2	0.15126	0.23318	0.43519	0.994502	8917	3	0.15126
ALG5	6	0.44773	0.64582	1	11184	2	-0.090868	0.041864	0.12974	0.905155	2890	2	-0.090868
ALG6	6	0.58023	0.73139	1	13145	1	0.016564	0.014973	0.056022	0.836024	1354	2	0.016564
ALG8	6	0.66303	0.78962	1	14561	2	0.23664	0.10715	0.26195	0.952549	5563	3	0.23664
ALG9	6	0.40276	0.61855	1	10550	2	-0.022568	0.68774	0.80833	1	15761	2	-0.022568
ALK	6	0.88668	0.89855	1	17587	1	0.36923	0.020805	0.074753	0.878761	1720	4	0.36923
ALKBH1	6	0.48163	0.66684	1	11654	2	0.18276	0.12861	0.30192	0.956978	6408	4	0.18276
ALKBH2	6	0.19787	0.39265	1	6262	3	-0.17654	0.96646	0.96644	1	19193	0	-0.17654
ALKBH3	6	0.71239	0.82668	1	15438	1	0.22307	0.012972	0.049414	0.82295	1219	3	0.22307
ALKBH4	6	0.86168	0.88466	1	17178	1	0.25481	0.050089	0.14745	0.914655	3261	3	0.25481
ALKBH5	6	0.81684	0.86421	1	16547	1	0.26354	0.021756	0.077761	0.878761	1785	3	0.26354
ALKBH6	6	0.20003	0.39515	1	6295	3	-0.052802	0.20108	0.39836	0.986678	8242	3	-0.052802
ALKBH7	6	0.85195	0.87978	1	17030	1	0.03885	0.64462	0.77724	1	15202	2	0.03885
ALKBH8	6	0.10615	0.25981	1	4404	4	-0.24258	0.70055	0.81792	1	15941	2	-0.24258
ALLC	6	0.02311	0.082002	0.689736	2432	4	-0.50586	0.90436	0.91101	1	18001	1	-0.50586
ALMS1	6	0.62402	0.76181	1	13865	1	0.041226	0.37612	0.59394	1	11815	3	0.041226
ALOX12	6	0.84461	0.87629	1	16913	1	0.13373	0.57152	0.72714	1	14302	2	0.13373
ALOX12B	6	0.50748	0.68324	1	12021	2	-0.047739	0.23857	0.44129	0.996252	9016	2	-0.047739
ALOX15	6	0.97401	0.9741	1	19834	0	0.13376	0.082929	0.21487	0.937881	4638	3	0.13376
ALOX15B	6	0.25702	0.46123	1	7374	2	0.31054	0.05617	0.16051	0.923365	3521	4	0.31054
ALOX5	6	0.98775	0.98782	1	20281	0	0.16775	0.37226	0.58973	1	11730	3	0.16775
ALOX5AP	6	0.97649	0.97661	1	19911	0	0.24814	0.085648	0.22024	0.938962	4747	4	0.24814
ALOXE3	6	0.12862	0.30184	1	4965	3	-0.05955	0.021741	0.077715	0.878761	1781	3	-0.05955
ALPI	6	0.54246	0.7061	1	12535	2	0.19398	0.13046	0.30536	0.957333	6475	4	0.19398
ALPK1	6	0.95136	0.95145	1	19140	0	-0.018201	0.57003	0.72617	1	14287	1	-0.018201
ALPK2	6	0.48598	0.66958	1	11720	1	0.2726	0.08616	0.22126	0.939515	4767	3	0.2726
ALPK3	6	0.83514	0.87199	1	16790	1	0.12577	0.45591	0.65379	1	12912	2	0.12577
ALPL	6	0.45019	0.64736	1	11217	2	0.22571	0.18162	0.37553	0.978534	7829	3	0.22571
ALPP	6	0.54294	0.70643	1	12543	2	0.058292	0.40295	0.62218	1	12336	2	0.058292
ALPPL2	6	0.29673	0.50616	1	8213	2	0.24106	0.10794	0.26342	0.952549	5605	3	0.24106
ALS2	6	0.12922	0.30297	1	4978	3	-0.25048	0.56161	0.7205	1	14189	2	-0.25048
ALS2CL	6	0.9254	0.92646	1	18420	1	0.10957	0.17825	0.37155	0.977113	7755	3	0.10957
ALS2CR11	6	0.75589	0.84232	1	15888	1	0.18729	0.23403	0.43613	0.994591	8938	3	0.18729
ALS2CR12	6	0.84896	0.87834	1	16988	1	0.20871	0.26281	0.46915	1	9537	3	0.20871
ALS2CR8	6	0.24629	0.4487	1	7165	3	-0.19069	0.69172	0.81127	1	15817	1	-0.19069
ALX1	6	0.75536	0.84215	1	15883	1	0.1459	0.36205	0.57881	1	11543	2	0.1459
ALX3	6	0.24058	0.44214	1	7071	3	-0.26912	0.91656	0.91973	1	18182	1	-0.26912
ALX4	6	0.37737	0.59511	1	10034	2	0.28774	0.048448	0.14396	0.911616	3184	3	0.28774
ALYREF	6	0.023877	0.084397	0.69881	2467	4	-0.44775	0.87082	0.89093	1	17555	1	-0.44775
AMACR	6	0.95188	0.95196	1	19166	0	0.40861	0.014306	0.053796	0.8357	1302	4	0.40861
AMBN	6	0.91978	0.92173	1	18282	1	-0.034916	0.94762	0.94768	1	18811	0	-0.034916
AMBP	6	0.75372	0.84163	1	15868	1	0.25016	0.1324	0.30889	0.959488	6536	4	0.25016
AMBRA1	6	0.12113	0.28796	1	4772	3	0.022651	0.10268	0.2535	0.95178	5400	3	0.022651
AMD1	6	0.98058	0.98075	1	20031	0	0.27047	0.11495	0.27664	0.953687	5880	4	0.27047
AMDHD1	6	0.064451	0.17706	1	3429	4	-0.39048	0.74903	0.84296	1	16439	1	-0.39048
AMDHD2	6	0.58676	0.73583	1	13263	2	0.27562	0.093096	0.23489	0.948161	5013	3	0.27562
AMELX	6	0.22939	0.42928	1	6844	2	0.17002	0.019189	0.069637	0.878761	1611	3	0.17002
AMELY	5	0.41731	0.58523	1	10760	2	0.092767	0.58294	0.72194	1	14438	2	0.092767
AMER1	6	0.96952	0.96954	1	19715	0	0.4149	0.0032781	0.015461	0.765217	399	5	0.4149
AMER2	6	0.38684	0.60541	1	10251	2	0.0452	0.7984	0.85936	1	16844	1	0.0452
AMER3	6	0.5173	0.68959	1	12149	2	0.2007	0.21833	0.41816	0.990276	8610	3	0.2007
AMFR	6	0.052979	0.15296	0.978748	3169	4	-0.87564	0.32217	0.53541	1	10735	2	-0.87564
AMH	6	0.39273	0.61172	1	10390	3	-0.02857	0.58034	0.73307	1	14407	2	-0.02857
AMHR2	6	0.48829	0.67105	1	11748	1	0.3125	0.11476	0.27628	0.953687	5874	3	0.3125
AMICA1	6	0.59061	0.73849	1	13328	1	0.041448	0.093008	0.23473	0.948161	5010	3	0.041448
AMIGO1	6	0.13268	0.30936	1	5070	2	0.055499	0.32888	0.5428	1	10881	3	0.055499
AMIGO2	6	0.34582	0.56075	1	9308	2	-0.20532	0.088417	0.22573	0.940938	4855	1	-0.20532
AMIGO3	6	0.44337	0.64316	1	11112	1	0.077172	0.29846	0.50901	1	10257	3	0.077172
AMMECR1	6	0.82462	0.86741	1	16657	1	0.20405	0.1097	0.26678	0.952549	5678	4	0.20405
AMMECR1L	6	0.97114	0.97119	1	19759	0	0.12183	0.2943	0.50443	1	10172	3	0.12183
AMN	6	0.0089358	0.035636	0.404344	1810	4	-0.59758	0.42916	0.63765	1	12620	1	-0.59758
AMN1	6	0.28568	0.49377	1	7975	2	0.33583	0.048701	0.14449	0.911616	3198	4	0.33583
AMOT	6	0.85603	0.88182	1	17091	1	0.11322	0.32898	0.54291	1	10884	2	0.11322
AMOTL1	6	0.19515	0.38939	1	6203	2	0.080968	0.086852	0.22259	0.940143	4796	3	0.080968
AMOTL2	6	0.146	0.33054	1	5385	3	-0.050047	0.030303	0.10396	0.888875	2374	3	-0.050047
AMPD1	6	0.0013817	0.0070362	0.128212	1129	6	-0.37565	0.99862	0.99861	1	20292	0	-0.37565
AMPD2	6	0.04117	0.1274	0.89424	2900	2	-0.011396	0.65623	0.78539	1	15338	2	-0.011396
AMPD3	6	0.44003	0.64108	1	11066	2	0.026726	0.074018	0.1971	0.934827	4277	2	0.026726
AMPH	6	0.99453	0.99456	1	20513	0	0.70394	0.0008294	0.0043404	0.670497	131	5	0.70394
AMT	6	0.52828	0.69672	1	12294	2	0.24109	0.066636	0.18213	0.926907	3977	3	0.24109
AMTN	6	0.60652	0.74946	1	13571	1	-0.041946	0.34194	0.557	1	11134	2	-0.041946
AMY1A	6	0.02834	0.098082	0.76227	2622	3	-0.24416	0.38786	0.60657	1	12027	2	-0.24416
AMY1B	2	0.52814	0.53142	1	12290	1	-0.092515	0.068404	0.1194	0.901636	4069	1	-0.092515
AMY1C	3	0.021369	0.055009	0.538387	2374	2	-0.90603	0.14928	0.25122	0.949767	7086	1	-0.90603
AMY2A	4	0.13776	0.2807	1	5224	2	-0.33185	0.89286	0.89277	1	17824	0	-0.33185
AMY2B	4	0.66337	0.7111	1	14567	1	0.13601	0.27765	0.42741	0.992865	9830	2	0.13601
AMZ1	6	0.90479	0.91047	1	17936	1	0.23469	0.10652	0.26074	0.952549	5539	3	0.23469
AMZ2	6	0.90505	0.91065	1	17941	1	-0.063921	0.8472	0.87925	1	17300	1	-0.063921
ANAPC1	6	0.013409	0.050763	0.51084	2035	3	-0.61575	0.53044	0.70033	1	13792	2	-0.61575
ANAPC10	6	0.00029044	0.001572	0.045131	717	5	-1.296	0.44683	0.64831	1	12816	1	-1.296
ANAPC11	6	0.012974	0.049344	0.502233	2011	4	-1.6364	0.50514	0.68414	1	13494	2	-1.6364
ANAPC13	6	0.29028	0.49898	1	8077	2	-0.028248	0.16098	0.35111	0.97149	7345	2	-0.028248
ANAPC15	6	0.005837	0.024678	0.314919	1603	5	-0.55845	0.99544	0.99551	1	20073	0	-0.55845
ANAPC16	6	0.14039	0.32337	1	5295	4	-0.25149	0.48778	0.67332	1	13294	1	-0.25149
ANAPC2	6	4.88e-05	0.00026905	0.013889	398	5	-1.1695	0.99045	0.99053	1	19860	0	-1.1695
ANAPC4	6	0.00047077	0.0024827	0.062662	813	5	-1.0181	0.99364	0.99372	1	19985	0	-1.0181
ANAPC5	6	7.87e-07	7.65e-06	0.001879	80	6	-2.011	1	1	1	20663	0	-2.011
ANAPC7	6	0.20383	0.39964	1	6379	2	0.14447	0.21747	0.41719	0.989779	8594	3	0.14447
ANG	6	0.27425	0.48089	1	7745	2	0.099526	0.10538	0.25866	0.952549	5492	3	0.099526
ANGEL1	6	0.064447	0.17705	1	3428	3	-0.29438	0.45065	0.65062	1	12854	2	-0.29438
ANGEL2	6	0.87014	0.8891	1	17323	1	-0.044536	0.11953	0.28515	0.953687	6070	1	-0.044536
ANGPT1	6	0.6599	0.78734	1	14499	2	-0.10192	0.63072	0.76744	1	15034	2	-0.10192
ANGPT2	6	0.48541	0.66922	1	11707	2	0.18109	0.29725	0.50767	1	10231	3	0.18109
ANGPT4	6	0.2434	0.44542	1	7107	3	-0.19015	0.76531	0.84807	1	16552	1	-0.19015
ANGPTL1	6	0.52043	0.69158	1	12195	2	0.0091766	0.61646	0.75765	1	14859	1	0.0091766
ANGPTL2	6	0.91165	0.91541	1	18080	1	0.32258	0.0036269	0.016773	0.770387	433	3	0.32258
ANGPTL3	6	0.92039	0.92226	1	18301	1	0.061004	0.23891	0.44169	0.996252	9027	3	0.061004
ANGPTL4	6	0.29676	0.50621	1	8216	2	0.27648	0.061186	0.17095	0.926907	3732	4	0.27648
ANGPTL5	6	0.17396	0.36433	1	5830	3	-0.083137	0.24202	0.4453	0.996252	9104	3	-0.083137
ANGPTL6	6	0.65276	0.78221	1	14384	2	0.1242	0.21353	0.41269	0.988622	8515	3	0.1242
ANGPTL7	6	0.86735	0.88761	1	17273	1	0.2277	0.09777	0.24404	0.948582	5201	4	0.2277
ANHX	6	0.9193	0.92135	1	18270	1	0.4789	0.0015236	0.0077048	0.738121	209	5	0.4789
ANK1	6	0.991	0.99106	1	20391	0	0.24799	0.16143	0.35165	0.97149	7357	3	0.24799
ANK2	6	0.85956	0.88359	1	17147	1	0.25969	0.029543	0.10173	0.885844	2325	4	0.25969
ANK3	6	0.25868	0.46312	1	7400	2	0.14047	0.10562	0.25909	0.952549	5504	3	0.14047
ANKAR	6	0.69243	0.81148	1	15056	2	0.17087	0.23321	0.43523	0.994502	8919	3	0.17087
ANKDD1A	6	0.1809	0.37256	1	5943	3	0.0086943	0.27759	0.48578	1	9826	3	0.0086943
ANKDD1B	6	0.98838	0.98847	1	20298	0	0.15427	0.34461	0.55991	1	11186	3	0.15427
ANKEF1	6	0.66171	0.78867	1	14536	1	0.049017	0.57386	0.72872	1	14323	2	0.049017
ANKFN1	6	0.65265	0.78213	1	14380	1	-0.026818	0.18271	0.37679	0.979597	7850	1	-0.026818
ANKFY1	6	0.07162	0.19168	1	3580	4	-0.35911	0.839	0.87559	1	17216	1	-0.35911
ANKH	6	0.13766	0.31843	1	5220	4	-0.20729	0.79209	0.85712	1	16786	1	-0.20729
ANKHD1	6	0.027875	0.096621	0.755878	2603	3	-0.1482	0.23975	0.44269	0.996252	9043	2	-0.1482
ANKHD1-EIF4EBP3	4	0.46442	0.61187	1	11426	2	-0.076173	0.90392	0.90388	1	17991	0	-0.076173
ANKIB1	6	0.53174	0.69905	1	12360	2	-0.02263	0.23248	0.43439	0.994341	8903	2	-0.02263
ANKK1	6	0.02223	0.079209	0.675612	2400	5	-0.28171	0.059991	0.16843	0.926805	3693	1	-0.28171
ANKLE2	6	0.00058202	0.0030676	0.071429	885	5	-1.3209	0.98695	0.98703	1	19757	0	-1.3209
ANKMY1	6	0.26779	0.47356	1	7597	3	-0.18488	0.40723	0.62468	1	12384	2	-0.18488
ANKMY2	6	0.72514	0.83295	1	15621	1	-0.0076336	0.04003	0.12571	0.904688	2800	2	-0.0076336
ANKRA2	6	0.83511	0.87198	1	16789	1	0.22565	0.23016	0.43179	0.993426	8855	3	0.22565
ANKRD1	6	0.23192	0.43219	1	6890	3	-0.18559	0.66388	0.79089	1	15452	2	-0.18559
ANKRD10	6	0.14268	0.3265	1	5333	2	0.24093	0.095788	0.24021	0.948582	5118	3	0.24093
ANKRD11	6	0.62291	0.76102	1	13838	2	0.17725	0.046077	0.13888	0.909154	3079	3	0.17725
ANKRD12	6	0.18531	0.3778	1	6026	2	0.10682	0.21639	0.41592	0.989706	8574	3	0.10682
ANKRD13A	6	0.37831	0.59614	1	10059	1	0.11884	0.26073	0.4668	1	9491	2	0.11884
ANKRD13B	6	0.62369	0.76158	1	13860	2	0.086754	0.20292	0.4005	0.98778	8271	3	0.086754
ANKRD13C	6	0.74274	0.83816	1	15762	1	0.23321	0.11697	0.28041	0.953687	5968	4	0.23321
ANKRD13D	6	0.52893	0.69719	1	12306	1	0.4989	0.041404	0.12876	0.905155	2863	4	0.4989
ANKRD16	6	0.88898	0.89997	1	17636	1	0.26233	0.096725	0.24205	0.948582	5155	4	0.26233
ANKRD17	6	0.00064604	0.0033857	0.076344	910	6	-1.3197	0.99935	0.99936	1	20382	0	-1.3197
ANKRD18A	6	0.22862	0.42843	1	6825	3	-0.26555	0.19058	0.38603	0.983721	8011	2	-0.26555
ANKRD18B	6	0.087405	0.22327	1	3959	4	-0.35653	0.99242	0.99249	1	19946	0	-0.35653
ANKRD2	6	0.52993	0.69786	1	12325	2	0.088312	0.077666	0.20441	0.935411	4436	3	0.088312
ANKRD20A1	6	0.005392	0.023049	0.302306	1560	4	-0.32543	0.095479	0.23963	0.948582	5107	1	-0.32543
ANKRD20A2	1	0.90418	0.90454	1	17924	0	0.36856	0.095817	0.095822	0.882131	5121	1	0.36856
ANKRD20A3	2	0.19124	0.2635	1	6133	1	-0.46243	0.71715	0.71691	1	16180	0	-0.46243
ANKRD22	6	0.62089	0.75963	1	13797	1	0.10825	0.35735	0.57369	1	11440	3	0.10825
ANKRD23	6	0.93816	0.9383	1	18757	0	0.10065	0.61269	0.755	1	14808	2	0.10065
ANKRD24	6	0.78581	0.85241	1	16204	1	0.18646	0.31548	0.52804	1	10595	3	0.18646
ANKRD26	6	0.68996	0.80964	1	15008	2	-0.1504	0.11186	0.27084	0.953687	5745	2	-0.1504
ANKRD27	6	0.53977	0.70431	1	12487	2	-0.10314	0.95457	0.95462	1	18963	0	-0.10314
ANKRD28	6	0.88269	0.89619	1	17525	1	0.27651	0.0047861	0.021006	0.782477	539	4	0.27651
ANKRD29	6	0.90438	0.91018	1	17928	1	0.28113	0.11771	0.28179	0.953687	5993	3	0.28113
ANKRD30A	6	0.4858	0.66948	1	11715	2	0.22613	0.034379	0.11319	0.897746	2561	3	0.22613
ANKRD30B	6	0.13699	0.31721	1	5193	2	-0.03972	0.47014	0.66247	1	13086	2	-0.03972
ANKRD32	6	0.086161	0.22084	1	3939	2	0.09382	0.35434	0.57044	1	11384	3	0.09382
ANKRD33	6	0.30182	0.51194	1	8325	1	0.29005	0.014369	0.054024	0.8357	1305	3	0.29005
ANKRD33B	6	0.89984	0.90705	1	17834	1	0.016442	0.87226	0.89166	1	17569	1	0.016442
ANKRD34A	6	0.095573	0.23945	1	4166	3	-0.13725	0.062548	0.17379	0.926907	3789	3	-0.13725
ANKRD34B	6	0.97975	0.97992	1	20002	0	0.35904	0.0084373	0.034039	0.793744	871	4	0.35904
ANKRD34C	6	0.98294	0.98312	1	20111	0	0.27882	0.044896	0.13631	0.906716	3032	4	0.27882
ANKRD35	6	0.094179	0.23667	1	4118	2	0.056962	0.21453	0.41382	0.988622	8538	3	0.056962
ANKRD36	6	0.11613	0.27867	1	4646	2	0.19203	0.12361	0.29272	0.955061	6224	3	0.19203
ANKRD37	6	0.76355	0.84478	1	15959	1	0.38235	0.032457	0.10882	0.893159	2475	4	0.38235
ANKRD39	6	0.40858	0.62202	1	10634	2	0.19932	0.016067	0.05955	0.839141	1438	3	0.19932
ANKRD40	6	0.028636	0.098976	0.765051	2636	5	-0.37418	0.82319	0.86892	1	17060	1	-0.37418
ANKRD42	6	0.69565	0.81387	1	15121	1	0.15031	0.37163	0.58906	1	11721	2	0.15031
ANKRD44	6	0.60518	0.74853	1	13552	2	-0.018686	0.55795	0.71815	1	14150	2	-0.018686
ANKRD45	6	0.97497	0.97509	1	19861	0	0.040334	0.10063	0.24959	0.948764	5330	2	0.040334
ANKRD46	6	0.38915	0.60789	1	10308	3	-0.033608	0.22218	0.42257	0.99236	8686	3	-0.033608
ANKRD49	6	0.011888	0.045668	0.478644	1955	5	-0.38688	0.51672	0.69151	1	13626	1	-0.38688
ANKRD50	6	0.87612	0.89239	1	17421	1	0.20966	0.12958	0.30372	0.957333	6437	4	0.20966
ANKRD52	6	0.67201	0.7963	1	14715	2	-0.066779	0.36286	0.57966	1	11558	2	-0.066779
ANKRD53	6	0.90496	0.91059	1	17939	1	0.33711	0.054031	0.15591	0.919011	3419	4	0.33711
ANKRD54	6	0.31025	0.52141	1	8494	3	-0.014629	0.66322	0.79043	1	15441	2	-0.014629
ANKRD55	6	0.34748	0.56259	1	9345	3	0.1394	0.0063449	0.026641	0.788145	671	3	0.1394
ANKRD6	6	0.33984	0.5542	1	9167	3	-0.042038	0.31931	0.53227	1	10661	3	-0.042038
ANKRD61	6	0.34451	0.55932	1	9274	3	-0.084933	0.71076	0.82554	1	16091	2	-0.084933
ANKRD62	6	0.78249	0.85124	1	16160	1	0.12639	0.36288	0.57968	1	11559	3	0.12639
ANKRD65	6	0.56157	0.71867	1	12824	2	0.1642	0.10736	0.26233	0.952549	5573	3	0.1642
ANKRD66	6	0.93353	0.93377	1	18637	1	0.030937	0.027145	0.0944	0.88103	2163	2	0.030937
ANKRD7	6	0.56414	0.72042	1	12863	2	0.16954	0.40005	0.61943	1	12293	3	0.16954
ANKRD9	6	0.01573	0.058416	0.557236	2143	5	-0.55112	0.52861	0.69913	1	13761	1	-0.55112
ANKS1A	6	0.97061	0.97063	1	19745	0	0.3961	0.063063	0.17483	0.926907	3809	4	0.3961
ANKS1B	6	0.8509	0.87927	1	17015	1	0.072969	0.043254	0.13276	0.906278	2956	3	0.072969
ANKS3	6	0.10196	0.2518	1	4308	4	-0.27696	0.97233	0.97236	1	19333	0	-0.27696
ANKS4B	6	0.91544	0.9183	1	18177	1	0.07245	0.16174	0.35201	0.97149	7369	2	0.07245
ANKS6	6	0.54232	0.706	1	12527	2	0.26327	0.065689	0.1802	0.926907	3931	4	0.26327
ANKZF1	6	0.68283	0.80431	1	14894	2	-0.12048	0.44808	0.64907	1	12832	1	-0.12048
ANLN	6	0.22439	0.42345	1	6753	3	-0.14367	0.53625	0.70402	1	13868	2	-0.14367
ANO1	6	0.21623	0.41401	1	6603	2	-0.064723	0.33359	0.54791	1	10973	2	-0.064723
ANO10	6	0.96027	0.96023	1	19421	0	0.28664	0.099065	0.24662	0.948582	5269	4	0.28664
ANO3	6	0.36037	0.5766	1	9640	2	0.059196	0.62647	0.76454	1	14982	2	0.059196
ANO4	6	0.66185	0.78877	1	14537	2	0.083608	0.37015	0.58749	1	11700	3	0.083608
ANO5	6	0.96888	0.96886	1	19695	0	0.1012	0.15816	0.34775	0.97131	7288	3	0.1012
ANO6	6	0.28304	0.49078	1	7918	2	0.13937	0.20641	0.40451	0.98778	8356	3	0.13937
ANO7	6	0.38198	0.60007	1	10143	3	-0.19906	0.13134	0.30694	0.95818	6503	2	-0.19906
ANO8	6	0.98841	0.9885	1	20300	0	0.098046	0.61123	0.75399	1	14790	2	0.098046
ANO9	6	0.52849	0.69689	1	12298	2	0.21466	0.14183	0.32595	0.966884	6857	4	0.21466
ANP32A	6	0.40863	0.62206	1	10635	2	-0.14987	0.83579	0.8742	1	17183	1	-0.14987
ANP32B	6	0.41741	0.62731	1	10762	2	-0.09357	0.52811	0.69879	1	13754	2	-0.09357
ANP32D	6	0.97263	0.97267	1	19797	0	0.11657	0.39867	0.618	1	12258	3	0.11657
ANP32E	6	0.24938	0.45224	1	7238	3	-0.22934	0.9863	0.98642	1	19733	0	-0.22934
ANPEP	6	0.10405	0.25584	1	4355	4	-0.22766	0.45874	0.65547	1	12943	1	-0.22766
ANTXR1	6	0.28767	0.49602	1	8010	1	0.0061198	0.13095	0.30623	0.957333	6492	2	0.0061198
ANTXR2	6	0.2446	0.44679	1	7128	1	-0.0085059	0.54829	0.71186	1	14031	2	-0.0085059
ANXA1	6	0.41471	0.62569	1	10718	2	-0.038576	0.3939	0.61299	1	12157	3	-0.038576
ANXA10	6	0.68281	0.8043	1	14893	1	0.24316	0.11986	0.2858	0.953687	6082	4	0.24316
ANXA11	6	0.074504	0.19754	1	3655	3	-0.23028	0.053311	0.15439	0.919011	3391	2	-0.23028
ANXA13	6	0.034642	0.11284	0.828608	2774	4	-0.49801	0.37599	0.59379	1	11810	2	-0.49801
ANXA2	6	0.35623	0.57211	1	9546	2	0.15569	0.085299	0.21955	0.938962	4732	3	0.15569
ANXA2R	6	0.55865	0.71675	1	12772	2	0.10302	0.30843	0.52018	1	10456	3	0.10302
ANXA3	6	0.96715	0.96713	1	19630	0	0.36607	0.013426	0.05089	0.825153	1249	3	0.36607
ANXA4	6	0.9952	0.99526	1	20535	0	0.44338	0.00086936	0.0045494	0.677506	135	4	0.44338
ANXA5	6	0.35348	0.56915	1	9484	2	0.34303	0.010957	0.042637	0.820434	1056	4	0.34303
ANXA6	6	0.51651	0.68909	1	12143	1	0.20596	0.10665	0.26099	0.952549	5545	3	0.20596
ANXA7	6	0.99416	0.99421	1	20496	0	0.35896	0.012476	0.047706	0.82295	1168	5	0.35896
ANXA8	6	0.61316	0.75413	1	13673	1	0.12758	0.053905	0.15563	0.919011	3413	3	0.12758
ANXA8L1	4	0.74269	0.76046	1	15759	1	0.22829	0.03187	0.087689	0.879085	2448	2	0.22829
ANXA8L2	3	0.13399	0.23105	1	5109	2	-0.45926	0.60541	0.62882	1	14726	1	-0.45926
ANXA9	6	0.5114	0.68574	1	12078	2	-0.10618	0.16653	0.35774	0.972052	7492	1	-0.10618
AOAH	6	0.59714	0.743	1	13431	2	-0.076277	0.96004	0.95999	1	19069	0	-0.076277
AOC2	6	0.60127	0.74582	1	13483	2	0.16276	0.39227	0.61127	1	12123	3	0.16276
AOC3	6	0.49364	0.67444	1	11830	2	0.11778	0.16934	0.36105	0.973868	7553	3	0.11778
AOX1	6	0.47336	0.66164	1	11541	2	0.081365	0.2848	0.49378	1	9964	3	0.081365
AP1AR	4	0.30307	0.45103	1	8344	2	0.16972	0.10252	0.22017	0.938962	5392	2	0.16972
AP1B1	6	0.85756	0.8826	1	17117	1	0.19114	0.14745	0.3348	0.968054	7042	3	0.19114
AP1G1	6	0.56813	0.72318	1	12935	2	0.10248	0.58703	0.73753	1	14499	2	0.10248
AP1G2	6	0.95316	0.95323	1	19209	0	0.11602	0.33608	0.55064	1	11024	2	0.11602
AP1M1	6	0.21082	0.40775	1	6508	3	-0.20481	0.50517	0.68417	1	13495	1	-0.20481
AP1M2	6	0.18212	0.37401	1	5969	3	-0.12345	0.96169	0.96167	1	19097	0	-0.12345
AP1S1	6	0.26101	0.46587	1	7452	3	-0.22159	0.8598	0.88531	1	17440	1	-0.22159
AP1S2	6	0.94828	0.94834	1	19048	0	0.28243	0.024066	0.085033	0.878761	1948	5	0.28243
AP1S3	6	0.90624	0.91149	1	17967	1	0.13013	0.11228	0.27163	0.953687	5761	3	0.13013
AP2A1	6	0.70473	0.82083	1	15285	2	0.32993	0.074683	0.19843	0.934942	4310	4	0.32993
AP2A2	6	0.59287	0.74006	1	13363	2	0.2989	0.041405	0.12876	0.905155	2864	3	0.2989
AP2B1	6	0.074214	0.19697	1	3646	2	0.10988	0.16884	0.36043	0.973641	7541	3	0.10988
AP2M1	6	0.092037	0.23245	1	4067	4	-0.53607	0.98982	0.98991	1	19843	0	-0.53607
AP2S1	6	1.31e-07	2.15e-06	0.001114	36	6	-2.5939	0.99989	0.99989	1	20517	0	-2.5939
AP3B1	6	0.57903	0.73053	1	13123	2	-0.12028	0.65884	0.78728	1	15374	1	-0.12028
AP3B2	6	0.10742	0.26221	1	4437	4	-0.25307	0.83497	0.87387	1	17174	1	-0.25307
AP3D1	6	0.065742	0.17972	1	3464	4	-0.34933	0.87419	0.89272	1	17588	1	-0.34933
AP3M1	6	0.81749	0.86448	1	16558	1	0.24787	0.096174	0.24099	0.948582	5141	4	0.24787
AP3M2	6	0.32729	0.54042	1	8899	3	-0.19296	0.99469	0.99473	1	20033	0	-0.19296
AP3S1	6	0.42237	0.63035	1	10825	2	0.25809	0.028601	0.098886	0.885454	2258	3	0.25809
AP3S2	6	0.14544	0.32985	1	5376	3	-0.090145	0.46935	0.66201	1	13076	1	-0.090145
AP4B1	6	0.5998	0.74483	1	13461	1	0.057642	0.59362	0.74202	1	14595	2	0.057642
AP4E1	6	0.47574	0.66319	1	11575	2	0.045732	0.13549	0.31452	0.962252	6644	3	0.045732
AP4M1	6	0.94077	0.94089	1	18835	0	0.10787	0.25932	0.46514	1	9472	3	0.10787
AP4S1	6	0.36805	0.58498	1	9827	2	0.14802	0.26239	0.46864	1	9528	3	0.14802
AP5B1	6	0.55293	0.71299	1	12686	1	-0.010566	0.30123	0.51212	1	10317	2	-0.010566
AP5M1	6	0.90386	0.90979	1	17919	1	0.19777	0.01537	0.057314	0.836024	1389	3	0.19777
AP5S1	6	0.45507	0.65032	1	11282	1	0.14564	0.29197	0.50184	1	10113	3	0.14564
AP5Z1	6	0.19423	0.38832	1	6181	3	-0.19092	0.9943	0.99435	1	20015	0	-0.19092
APAF1	6	0.12358	0.29254	1	4831	3	-0.45297	0.7978	0.85915	1	16836	1	-0.45297
APBA1	6	0.98162	0.9818	1	20060	0	0.12214	0.5195	0.69324	1	13650	2	0.12214
APBA2	6	0.5352	0.70127	1	12412	2	0.24049	0.029225	0.10076	0.88579	2302	3	0.24049
APBA3	6	0.33357	0.54732	1	9037	3	-0.16852	0.85956	0.8852	1	17435	1	-0.16852
APBB1	6	0.96457	0.96456	1	19553	0	0.20519	0.32233	0.53561	1	10741	3	0.20519
APBB1IP	6	0.63741	0.77118	1	14121	1	0.15929	0.30511	0.51646	1	10392	3	0.15929
APBB2	6	0.81783	0.86463	1	16562	1	0.004064	0.58786	0.73807	1	14510	2	0.004064
APBB3	6	0.60246	0.74666	1	13500	2	0.16078	0.020164	0.072779	0.878761	1683	3	0.16078
APC	6	0.16264	0.35075	1	5650	3	-0.073563	0.79798	0.85921	1	16838	1	-0.073563
APC2	6	0.57806	0.72985	1	13103	2	0.003294	0.33809	0.55283	1	11063	3	0.003294
APCDD1	6	0.40125	0.61763	1	10534	2	0.095588	0.13098	0.30628	0.957333	6494	3	0.095588
APCDD1L	6	0.19166	0.3853	1	6142	3	-0.11246	0.49412	0.67725	1	13365	2	-0.11246
APCS	6	0.24022	0.44172	1	7060	3	-0.13613	0.76127	0.84679	1	16525	1	-0.13613
APEH	6	0.51262	0.68653	1	12095	1	0.12163	0.34424	0.5595	1	11181	3	0.12163
APEX1	6	0.0023299	0.011539	0.185304	1281	5	-0.92225	0.88873	0.90096	1	17777	1	-0.92225
APEX2	6	0.2453	0.4476	1	7142	1	0.29983	0.091907	0.23256	0.94737	4966	4	0.29983
APH1A	6	0.87717	0.89298	1	17438	1	0.38997	0.027371	0.095102	0.882131	2180	4	0.38997
APH1B	6	0.2072	0.40356	1	6437	2	0.03373	0.48352	0.67067	1	13251	2	0.03373
API5	6	0.46085	0.65389	1	11361	2	-0.14141	0.50838	0.68619	1	13533	2	-0.14141
APIP	6	0.30074	0.51072	1	8307	3	0.043899	0.28329	0.4921	1	9936	3	0.043899
APITD1	6	0.5844	0.7342	1	13219	2	-0.011211	0.70152	0.81863	1	15954	2	-0.011211
APITD1-CORT	2	0.72541	0.7252	1	15624	0	0.031888	0.62731	0.62715	1	14996	0	0.031888
APLF	6	0.45901	0.65273	1	11331	2	0.083777	0.34268	0.5578	1	11149	2	0.083777
APLN	6	0.77811	0.84972	1	16106	1	0.30477	0.010822	0.04221	0.818644	1047	5	0.30477
APLNR	6	0.90443	0.91021	1	17929	1	-0.012048	0.78536	0.85475	1	16713	1	-0.012048
APLP1	6	0.36256	0.57903	1	9683	3	-0.11892	0.97518	0.9753	1	19402	0	-0.11892
APLP2	6	0.35965	0.57583	1	9619	3	-0.13894	0.50156	0.68191	1	13453	2	-0.13894
APMAP	6	0.48039	0.66609	1	11637	2	-0.076803	0.084211	0.21739	0.938956	4687	2	-0.076803
APOA1	6	0.36718	0.58402	1	9804	3	-0.04751	0.62587	0.76414	1	14972	1	-0.04751
APOA1BP	6	0.60568	0.74887	1	13559	2	0.055131	0.72372	0.83532	1	16264	2	0.055131
APOA2	6	0.36294	0.57943	1	9695	2	0.084426	0.3392	0.55403	1	11083	3	0.084426
APOA4	6	0.17355	0.36384	1	5819	3	-0.028266	0.33124	0.54539	1	10922	3	-0.028266
APOA5	6	0.2055	0.40158	1	6403	2	0.22471	0.018657	0.067934	0.873689	1586	3	0.22471
APOB	6	0.93736	0.9375	1	18730	1	0.27463	0.02363	0.083673	0.878761	1917	4	0.27463
APOBEC1	6	0.13149	0.30714	1	5037	3	-0.11372	0.24605	0.44987	0.997892	9180	3	-0.11372
APOBEC2	6	0.95308	0.95315	1	19206	0	0.079673	0.28493	0.49393	1	9966	3	0.079673
APOBEC3A	6	0.64974	0.78007	1	14323	2	0.11847	0.36323	0.58006	1	11565	3	0.11847
APOBEC3A_B	2	0.78233	0.78197	1	16156	0	0.29053	0.14542	0.23406	0.947383	6992	1	0.29053
APOBEC3B	6	0.18926	0.38245	1	6095	3	-0.33269	0.41363	0.62847	1	12460	1	-0.33269
APOBEC3C	6	0.36751	0.58438	1	9810	3	-0.22011	0.98112	0.98129	1	19584	0	-0.22011
APOBEC3D	6	0.23386	0.43437	1	6938	3	-0.055315	0.81862	0.86708	1	17010	1	-0.055315
APOBEC3F	6	0.97857	0.97871	1	19976	0	0.55655	0.0056384	0.024079	0.782477	609	4	0.55655
APOBEC3G	6	0.075422	0.19943	1	3674	3	-0.23801	0.6406	0.77437	1	15151	1	-0.23801
APOBEC3H	6	0.12127	0.2882	1	4773	2	0.15933	0.19932	0.39626	0.985831	8209	3	0.15933
APOBEC4	6	0.47961	0.66559	1	11627	2	0.20322	0.1189	0.284	0.953687	6047	4	0.20322
APOBR	6	0.12737	0.29952	1	4924	4	-0.24053	0.9307	0.93135	1	18445	1	-0.24053
APOC1	6	0.86348	0.8856	1	17208	1	-0.0028611	0.57299	0.72814	1	14317	2	-0.0028611
APOC2	6	0.17643	0.36723	1	5867	2	-0.095198	0.61609	0.75741	1	14856	2	-0.095198
APOC3	6	0.76415	0.84498	1	15965	1	0.0814	0.16888	0.36048	0.973641	7542	2	0.0814
APOC4	6	0.38139	0.59944	1	10131	3	-0.088993	0.81499	0.86563	1	16976	1	-0.088993
APOD	6	0.0796	0.20774	1	3779	4	-0.34634	0.68912	0.80937	1	15777	2	-0.34634
APOE	6	0.43483	0.63788	1	10997	1	0.24792	0.088713	0.2263	0.941973	4865	4	0.24792
APOF	6	0.9755	0.97561	1	19879	0	0.12609	0.39734	0.6166	1	12230	3	0.12609
APOH	6	0.8061	0.85992	1	16442	1	0.27552	0.17825	0.37155	0.977113	7754	3	0.27552
APOL1	6	0.26741	0.4731	1	7590	3	-0.37593	0.41947	0.63191	1	12520	1	-0.37593
APOL2	6	0.81954	0.8653	1	16589	1	0.029955	0.033007	0.11008	0.894631	2501	3	0.029955
APOL3	6	0.96241	0.96239	1	19485	0	0.39022	0.040061	0.12579	0.904688	2803	4	0.39022
APOL4	6	0.29447	0.50367	1	8145	2	-0.066474	0.11378	0.27447	0.953687	5833	2	-0.066474
APOL5	6	0.021266	0.076181	0.657118	2371	5	-0.37605	0.1841	0.37841	0.981063	7872	1	-0.37605
APOL6	6	0.23733	0.4384	1	7009	2	0.19079	0.02797	0.09693	0.882131	2220	3	0.19079
APOLD1	6	0.03131	0.10528	0.793892	2705	4	-0.61868	0.093146	0.23498	0.948161	5017	1	-0.61868
APOM	6	0.30313	0.51338	1	8347	2	0.14062	0.32179	0.53498	1	10725	3	0.14062
APOO	6	0.98383	0.98397	1	20142	0	0.383	0.0044734	0.019876	0.780362	506	5	0.383
APOOL	6	0.5345	0.70082	1	12399	2	-0.007768	0.61947	0.75976	1	14897	2	-0.007768
APOPT1	6	0.663	0.7896	1	14559	1	0.09846	0.32699	0.54073	1	10844	3	0.09846
APP	6	0.55066	0.71152	1	12656	2	-0.0057467	0.66062	0.78856	1	15400	1	-0.0057467
APPBP2	6	0.75887	0.84329	1	15920	1	0.072867	0.35483	0.57099	1	11393	3	0.072867
APPL1	6	0.36998	0.58706	1	9870	3	-0.14956	0.77552	0.85145	1	16635	1	-0.14956
APPL2	6	0.98457	0.98472	1	20173	0	0.3162	0.018466	0.06733	0.872573	1577	5	0.3162
APRT	6	0.55338	0.71331	1	12694	1	-0.017107	0.69975	0.81731	1	15924	2	-0.017107
APTX	6	0.51139	0.68573	1	12077	1	0.56307	0.0066344	0.027705	0.788145	693	4	0.56307
AQP1	6	0.13323	0.31031	1	5084	3	0.0065286	0.39177	0.61074	1	12115	3	0.0065286
AQP10	6	0.39453	0.61362	1	10430	3	-0.06231	0.6435	0.77642	1	15191	2	-0.06231
AQP11	6	0.9914	0.99146	1	20404	0	0.24034	0.1009	0.25012	0.949283	5338	3	0.24034
AQP12B	6	0.35489	0.57069	1	9514	3	-0.14516	0.26344	0.46983	1	9555	1	-0.14516
AQP2	6	0.24358	0.44564	1	7110	2	0.10294	0.28248	0.49123	1	9926	2	0.10294
AQP3	6	0.98348	0.98364	1	20133	0	0.5096	0.0079226	0.032263	0.788145	824	5	0.5096
AQP4	6	0.44617	0.64485	1	11160	1	0.27578	0.18137	0.37523	0.978233	7825	3	0.27578
AQP5	6	0.63135	0.76689	1	14011	2	0.3524	0.075703	0.20053	0.935411	4344	4	0.3524
AQP6	6	0.86625	0.88704	1	17248	1	0.082565	0.69495	0.81364	1	15854	1	0.082565
AQP7	6	0.029955	0.10221	0.779016	2674	4	-0.46352	0.92799	0.92902	1	18396	1	-0.46352
AQP8	6	0.97708	0.97719	1	19929	0	0.48663	0.001475	0.0074729	0.738121	201	5	0.48663
AQP9	6	0.059101	0.16595	1	3305	4	-0.46219	0.94161	0.94175	1	18649	0	-0.46219
AQPEP	6	0.28834	0.49677	1	8026	3	-0.18202	0.13144	0.30711	0.95818	6507	2	-0.18202
AQR	4	0.43267	0.58008	1	10965	2	0.20988	0.07913	0.17832	0.926907	4495	2	0.20988
AR	6	0.32137	0.53382	1	8750	2	0.013746	0.71	0.82498	1	16079	1	0.013746
ARAF	6	0.92068	0.9225	1	18307	1	0.26175	0.051756	0.15109	0.918956	3325	4	0.26175
ARAP1	6	0.88844	0.89963	1	17625	1	0.073461	0.62318	0.76231	1	14943	2	0.073461
ARAP2	6	0.27788	0.48499	1	7819	1	0.19995	0.14378	0.32947	0.96726	6938	4	0.19995
ARAP3	6	0.77236	0.84779	1	16052	1	0.14214	0.099578	0.2476	0.948582	5285	3	0.14214
ARC	6	0.19045	0.38386	1	6123	1	0.18424	0.25446	0.4596	0.998475	9379	3	0.18424
ARCN1	6	0.00053039	0.0027845	0.067414	850	6	-1.7037	0.99916	0.99917	1	20351	0	-1.7037
AREG	6	0.97931	0.97945	1	19991	0	0.22141	0.092596	0.23391	0.947383	4997	3	0.22141
AREL1	6	0.30374	0.51406	1	8363	2	0.14974	0.037843	0.12088	0.901678	2706	3	0.14974
ARF1	6	6.93e-06	4.9e-05	0.00472	213	6	-2.7046	0.9996	0.9996	1	20427	0	-2.7046
ARF3	6	0.34443	0.55922	1	9273	3	-0.22371	0.34861	0.56427	1	11260	1	-0.22371
ARF4	6	0.013939	0.052532	0.522041	2062	5	-0.54761	0.51632	0.69126	1	13619	1	-0.54761
ARF5	6	0.085478	0.21946	1	3919	2	0.059824	0.28658	0.49582	1	10008	1	0.059824
ARF6	6	0.1036	0.25496	1	4345	3	-0.15959	0.40794	0.62512	1	12397	1	-0.15959
ARFGAP1	6	0.15975	0.34729	1	5599	3	-0.1426	0.59128	0.74044	1	14567	2	-0.1426
ARFGAP2	6	0.48785	0.67078	1	11742	2	-0.12977	0.73571	0.839	1	16342	1	-0.12977
ARFGAP3	6	0.39304	0.61206	1	10398	2	0.19753	0.041912	0.12984	0.905155	2892	3	0.19753
ARFGEF1	6	0.38149	0.59956	1	10134	2	0.16566	0.35808	0.57446	1	11459	3	0.16566
ARFGEF2	6	0.27193	0.47824	1	7690	2	-0.036128	0.012532	0.047904	0.82295	1175	1	-0.036128
ARFIP1	6	0.95711	0.95708	1	19324	0	0.34148	0.037509	0.12013	0.901636	2691	4	0.34148
ARFIP2	6	0.34953	0.56485	1	9396	3	-0.14837	0.93155	0.93212	1	18457	1	-0.14837
ARFRP1	6	0.0038011	0.017285	0.245915	1443	5	-0.60623	0.85635	0.88364	1	17397	1	-0.60623
ARG1	6	0.87431	0.89138	1	17390	1	0.023126	0.032398	0.10869	0.893155	2472	3	0.023126
ARG2	6	0.47776	0.66445	1	11603	1	0.13038	0.15615	0.34533	0.970128	7245	3	0.13038
ARGFX	6	0.65815	0.78607	1	14470	1	0.13573	0.36609	0.58313	1	11622	3	0.13573
ARGLU1	6	0.00037172	0.0019795	0.053423	764	6	-1.3317	0.99963	0.99963	1	20431	0	-1.3317
ARHGAP1	6	0.10208	0.25205	1	4310	4	-0.24751	0.51067	0.68765	1	13560	1	-0.24751
ARHGAP10	4	0.83881	0.83872	1	16833	1	-0.016504	0.40385	0.55193	1	12342	1	-0.016504
ARHGAP11A	6	0.95112	0.95118	1	19131	0	0.1704	0.25597	0.46134	0.999519	9403	3	0.1704
ARHGAP11B	5	0.48616	0.64052	1	11722	1	-0.039198	0.36018	0.54236	1	11504	2	-0.039198
ARHGAP12	6	0.91796	0.92026	1	18235	1	0.23019	0.12	0.28606	0.953687	6087	4	0.23019
ARHGAP15	6	0.97658	0.97669	1	19916	0	0.37602	0.026824	0.093431	0.880591	2144	5	0.37602
ARHGAP17	6	0.47095	0.66019	1	11514	2	0.039233	0.10938	0.26615	0.952549	5663	3	0.039233
ARHGAP18	6	0.32362	0.53633	1	8807	3	-0.066711	0.39196	0.61094	1	12119	3	-0.066711
ARHGAP19	6	0.19733	0.39198	1	6244	3	-0.085757	0.72599	0.83622	1	16292	1	-0.085757
ARHGAP20	6	0.19498	0.3892	1	6199	3	-0.11174	0.31783	0.53063	1	10634	3	-0.11174
ARHGAP21	6	0.26926	0.47525	1	7627	3	-0.28784	0.74783	0.8426	1	16431	1	-0.28784
ARHGAP22	6	0.37026	0.58738	1	9877	2	0.19656	0.102	0.25217	0.950301	5378	3	0.19656
ARHGAP23	6	0.88789	0.8993	1	17613	1	0.1938	0.091548	0.23189	0.946843	4952	4	0.1938
ARHGAP24	6	0.64025	0.77321	1	14172	2	0.4332	0.0090679	0.036214	0.804872	914	3	0.4332
ARHGAP25	6	0.57735	0.72939	1	13086	1	0.28674	0.096028	0.24069	0.948582	5131	3	0.28674
ARHGAP26	6	0.75201	0.84109	1	15852	1	0.64209	0.0081279	0.032979	0.788145	846	4	0.64209
ARHGAP27	6	0.24318	0.44517	1	7105	1	0.19893	0.18805	0.38309	0.983012	7958	3	0.19893
ARHGAP28	6	0.052681	0.15236	0.976753	3166	4	-0.45074	0.40935	0.62594	1	12410	2	-0.45074
ARHGAP29	6	0.26492	0.4703	1	7529	3	-0.15982	0.43832	0.64311	1	12732	1	-0.15982
ARHGAP30	6	0.12201	0.28961	1	4788	4	-0.28839	0.92967	0.93048	1	18427	1	-0.28839
ARHGAP31	6	0.0018303	0.0091766	0.157509	1199	5	-0.69282	0.94768	0.94774	1	18814	0	-0.69282
ARHGAP32	6	0.34724	0.56232	1	9341	3	0.043278	0.051273	0.15007	0.918193	3307	3	0.043278
ARHGAP33	6	0.38308	0.6013	1	10162	3	-0.14578	0.44201	0.6454	1	12766	2	-0.14578
ARHGAP35	6	0.67369	0.79754	1	14741	2	0.05182	0.16504	0.35596	0.971572	7463	3	0.05182
ARHGAP36	6	0.87073	0.88943	1	17332	1	0.18818	0.13322	0.31035	0.95995	6564	4	0.18818
ARHGAP39	6	0.12506	0.29523	1	4875	4	-0.31154	0.99134	0.99139	1	19897	0	-0.31154
ARHGAP4	6	0.075741	0.2001	1	3684	3	-0.32097	0.87924	0.89547	1	17636	1	-0.32097
ARHGAP40	6	0.098428	0.24499	1	4228	3	-0.47309	0.93705	0.93722	1	18564	1	-0.47309
ARHGAP44	6	0.10687	0.26116	1	4421	3	-0.066244	0.33636	0.55096	1	11029	3	-0.066244
ARHGAP5	6	0.86481	0.88629	1	17228	1	0.27694	0.022368	0.079678	0.878761	1828	5	0.27694
ARHGAP6	6	0.57568	0.72826	1	13054	2	0.14984	0.16778	0.35923	0.972538	7527	3	0.14984
ARHGAP8	6	0.24989	0.45282	1	7243	1	0.0051268	0.20919	0.40766	0.98778	8416	2	0.0051268
ARHGAP9	6	0.88525	0.89769	1	17570	1	-0.034262	0.41709	0.63048	1	12492	2	-0.034262
ARHGDIA	6	0.52279	0.6931	1	12222	1	0.091086	0.11743	0.28125	0.953687	5985	3	0.091086
ARHGDIB	6	0.93568	0.93581	1	18695	1	0.1368	0.34212	0.55719	1	11140	3	0.1368
ARHGDIG	6	0.11783	0.28181	1	4686	3	-0.24203	0.5135	0.68943	1	13589	2	-0.24203
ARHGEF1	6	0.66318	0.78974	1	14565	2	0.062665	0.3037	0.51487	1	10362	2	0.062665
ARHGEF10	6	0.54312	0.70655	1	12546	2	0.17971	0.054687	0.1573	0.919011	3460	3	0.17971
ARHGEF10L	6	0.98207	0.98227	1	20075	0	0.1643	0.12663	0.2983	0.956978	6318	4	0.1643
ARHGEF11	6	0.89608	0.90457	1	17771	1	0.17783	0.23562	0.43796	0.995611	8967	3	0.17783
ARHGEF12	6	0.96016	0.96012	1	19416	0	-0.024974	0.65285	0.78306	1	15298	2	-0.024974
ARHGEF15	6	0.17783	0.3689	1	5885	3	0.03321	0.17046	0.36239	0.974737	7576	3	0.03321
ARHGEF16	6	0.30623	0.5169	1	8420	3	-0.14825	0.73895	0.83994	1	16372	1	-0.14825
ARHGEF17	6	0.18456	0.37689	1	6008	2	0.073877	0.38864	0.60741	1	12044	3	0.073877
ARHGEF18	6	0.34789	0.56306	1	9356	3	-0.13521	0.17453	0.3672	0.975681	7672	1	-0.13521
ARHGEF19	6	0.60724	0.74994	1	13583	2	0.032727	0.2049	0.40277	0.98778	8317	2	0.032727
ARHGEF2	6	0.2736	0.48013	1	7729	3	-0.12921	0.22646	0.42753	0.992865	8770	3	-0.12921
ARHGEF25	6	0.90552	0.91098	1	17951	1	0.10652	0.08845	0.22578	0.940938	4860	3	0.10652
ARHGEF26	6	0.97666	0.97678	1	19921	0	0.35075	0.045352	0.1373	0.907529	3050	4	0.35075
ARHGEF28	6	0.083524	0.21557	1	3872	4	-0.35916	0.41147	0.62719	1	12440	2	-0.35916
ARHGEF3	6	0.1369	0.31705	1	5190	4	-0.339	0.43	0.63817	1	12628	2	-0.339
ARHGEF33	6	0.23695	0.43796	1	7000	3	-0.22219	0.2634	0.46979	1	9551	3	-0.22219
ARHGEF35	6	0.15046	0.33598	1	5459	3	-0.13186	0.1949	0.3911	0.984709	8107	3	-0.13186
ARHGEF37	6	0.69985	0.81714	1	15192	1	0.40226	0.010393	0.040788	0.816813	1013	4	0.40226
ARHGEF38	6	0.96583	0.9658	1	19592	0	0.29666	0.055406	0.15889	0.921542	3493	4	0.29666
ARHGEF39	6	0.089094	0.22666	1	3998	3	-0.1137	0.64541	0.77778	1	15215	2	-0.1137
ARHGEF4	6	0.61228	0.75351	1	13658	2	0.025592	0.7353	0.83887	1	16340	1	0.025592
ARHGEF40	6	0.76815	0.84633	1	16010	1	0.065252	0.52274	0.6953	1	13685	1	0.065252
ARHGEF5	6	0.34795	0.56311	1	9357	2	0.1327	0.26922	0.4764	1	9676	3	0.1327
ARHGEF6	6	0.99932	0.99933	1	20664	0	0.61416	0.000677	0.0035517	0.656017	106	6	0.61416
ARHGEF7	6	0.11592	0.27825	1	4639	3	-0.049578	0.14345	0.32885	0.967079	6927	3	-0.049578
ARHGEF9	6	0.93201	0.93235	1	18586	1	0.21675	0.032721	0.10942	0.893335	2488	3	0.21675
ARID1A	6	0.0051191	0.022078	0.293529	1539	5	-0.91798	0.97244	0.97247	1	19338	0	-0.91798
ARID1B	6	0.60489	0.74832	1	13547	2	0.10477	0.35803	0.5744	1	11457	3	0.10477
ARID2	6	0.0060949	0.025619	0.323164	1621	5	-0.69845	0.98308	0.98325	1	19642	0	-0.69845
ARID3A	6	0.0009882	0.0051253	0.103506	1023	5	-0.75238	0.91247	0.91673	1	18105	1	-0.75238
ARID3B	6	0.79052	0.85412	1	16266	1	0.28808	0.020225	0.072951	0.878761	1690	3	0.28808
ARID3C	6	0.32576	0.53869	1	8859	3	-0.12168	0.38082	0.59899	1	11891	2	-0.12168
ARID4A	6	0.028721	0.099248	0.766077	2640	3	-0.16145	0.6336	0.76949	1	15075	2	-0.16145
ARID4B	6	0.26773	0.47348	1	7594	3	-0.20714	0.4711	0.66306	1	13101	2	-0.20714
ARID5A	6	0.095465	0.23926	1	4162	3	-0.024097	0.032523	0.10896	0.893159	2478	3	-0.024097
ARID5B	6	0.71674	0.83002	1	15530	2	-0.065701	0.6016	0.74741	1	14690	2	-0.065701
ARIH1	6	0.057826	0.16331	1	3276	3	-0.44738	0.88337	0.89784	1	17701	1	-0.44738
ARIH2	6	0.46435	0.65609	1	11424	2	0.13848	0.073427	0.19589	0.93388	4256	3	0.13848
ARIH2OS	6	0.58705	0.73603	1	13267	2	0.094248	0.48894	0.67405	1	13310	2	0.094248
ARL1	6	0.057723	0.16308	1	3275	3	-0.29785	0.014841	0.055573	0.836024	1346	2	-0.29785
ARL10	6	0.62657	0.76354	1	13923	1	0.038963	0.53205	0.70138	1	13810	1	0.038963
ARL11	6	0.36034	0.57656	1	9639	3	-0.14451	0.87751	0.8945	1	17626	1	-0.14451
ARL13A	6	0.99461	0.99464	1	20517	0	0.29453	0.021001	0.075366	0.878761	1733	5	0.29453
ARL13B	6	0.74492	0.83884	1	15777	1	0.18894	0.078899	0.20685	0.936341	4487	3	0.18894
ARL14	6	0.25747	0.46173	1	7380	3	-0.069771	0.29026	0.49993	1	10084	2	-0.069771
ARL14EP	6	0.58297	0.7332	1	13187	1	0.37469	0.02774	0.096207	0.882131	2206	5	0.37469
ARL14EPL	6	0.97224	0.97228	1	19788	0	0.39132	0.029244	0.10082	0.88579	2306	4	0.39132
ARL15	6	0.8327	0.87087	1	16753	1	0.24134	0.080694	0.21037	0.936766	4554	4	0.24134
ARL16	6	0.14696	0.3317	1	5395	2	0.088277	0.086068	0.22108	0.939515	4762	2	0.088277
ARL17A	6	0.23792	0.43906	1	7022	2	0.062057	0.13088	0.30611	0.957333	6489	2	0.062057
ARL17B	2	0.21058	0.27724	1	6502	1	-0.44456	0.28096	0.33002	0.96726	9894	1	-0.44456
ARL2	6	1.53e-08	2.39e-07	0.000236	14	6	-1.8724	0.99906	0.99906	1	20335	0	-1.8724
ARL2BP	6	0.38926	0.608	1	10311	3	-0.077428	0.015969	0.05925	0.838666	1432	2	-0.077428
ARL3	6	0.36199	0.57841	1	9672	2	-0.2351	0.23948	0.44235	0.996252	9037	2	-0.2351
ARL4A	6	0.94709	0.94713	1	19020	0	0.087404	0.66919	0.79482	1	15529	2	0.087404
ARL4C	6	0.99362	0.9937	1	20479	0	0.43655	0.010595	0.041459	0.817327	1032	5	0.43655
ARL4D	6	0.8482	0.87796	1	16976	1	-0.053744	0.46147	0.65714	1	12978	2	-0.053744
ARL5A	6	0.94921	0.94926	1	19083	0	0.11231	0.23868	0.4414	0.996252	9020	3	0.11231
ARL5B	6	0.49662	0.67632	1	11869	2	0.030113	0.33373	0.54808	1	10975	3	0.030113
ARL5C	6	0.17408	0.36447	1	5835	3	-0.094329	0.4245	0.63492	1	12579	1	-0.094329
ARL6	6	0.98032	0.98048	1	20022	0	0.26133	0.088704	0.22628	0.941973	4864	4	0.26133
ARL6IP1	6	0.6341	0.76885	1	14065	2	0.17243	0.11744	0.28129	0.953687	5988	4	0.17243
ARL6IP5	6	0.57298	0.72645	1	13010	2	-0.03153	0.26309	0.46945	1	9543	2	-0.03153
ARL6IP6	6	0.20647	0.40272	1	6418	3	-0.10788	0.38917	0.608	1	12058	2	-0.10788
ARL8A	6	0.62264	0.76083	1	13830	1	0.31333	0.015928	0.059115	0.83838	1428	5	0.31333
ARL8B	6	0.22321	0.4221	1	6733	2	-0.018068	0.75627	0.84522	1	16485	1	-0.018068
ARL9	6	0.38444	0.60279	1	10198	1	0.31612	0.061339	0.17128	0.926907	3739	4	0.31612
ARMC1	6	0.31505	0.52681	1	8607	2	-0.17834	0.4567	0.65427	1	12924	2	-0.17834
ARMC10	6	0.61185	0.75321	1	13651	2	0.1328	0.032736	0.10945	0.893335	2489	3	0.1328
ARMC12	6	0.63482	0.76937	1	14076	2	-0.10546	0.7186	0.83148	1	16195	2	-0.10546
ARMC2	6	0.071646	0.19174	1	3582	4	-0.35786	0.25628	0.46169	0.999765	9410	1	-0.35786
ARMC3	6	0.95719	0.95715	1	19328	0	0.099485	0.091624	0.23204	0.946843	4955	2	0.099485
ARMC4	6	0.28566	0.49375	1	7974	3	-0.1576	0.65593	0.78518	1	15334	1	-0.1576
ARMC5	6	0.0018753	0.0093985	0.160519	1205	5	-0.66853	0.8572	0.88405	1	17406	1	-0.66853
ARMC6	6	0.5236	0.69363	1	12238	2	-0.037501	0.92442	0.92601	1	18321	1	-0.037501
ARMC7	6	0.00020648	0.00113	0.036606	637	6	-1.4643	0.99979	0.99979	1	20487	0	-1.4643
ARMC8	6	0.20044	0.39567	1	6304	1	0.46954	0.029233	0.10078	0.88579	2304	4	0.46954
ARMC9	6	0.12653	0.298	1	4909	4	-0.18941	0.49192	0.67585	1	13339	2	-0.18941
ARMCX1	6	0.13989	0.32248	1	5279	4	-0.20922	0.55934	0.71901	1	14169	2	-0.20922
ARMCX2	6	0.63479	0.76934	1	14074	2	0.03499	0.19472	0.39089	0.984709	8103	2	0.03499
ARMCX3	6	0.78193	0.85105	1	16153	1	0.314	0.014821	0.055521	0.836024	1344	5	0.314
ARMCX4	6	0.9496	0.94963	1	19088	0	0.33931	0.024248	0.085577	0.878761	1964	5	0.33931
ARMCX5	6	0.99275	0.99281	1	20452	0	0.73449	3.43e-05	0.00019922	0.374887	10	5	0.73449
ARMCX5-GPRASP2	6	0.32676	0.53984	1	8885	3	0.012038	0.31972	0.53276	1	10673	3	0.012038
ARMCX6	6	0.23872	0.43995	1	7039	3	-0.25125	0.71964	0.83222	1	16211	1	-0.25125
ARMS2	6	0.40514	0.61995	1	10574	2	0.029665	0.52922	0.69956	1	13774	1	0.029665
ARNT	6	0.60995	0.75186	1	13623	1	0.21689	0.13182	0.30782	0.95854	6523	3	0.21689
ARNT2	6	0.37856	0.59639	1	10063	3	-0.14849	0.32187	0.53508	1	10727	3	-0.14849
ARNTL	6	0.20983	0.40658	1	6485	2	0.18732	0.24074	0.44383	0.996252	9059	3	0.18732
ARNTL2	6	0.17987	0.37134	1	5924	3	-0.087049	0.61414	0.756	1	14829	2	-0.087049
ARPC1A	6	0.52911	0.69732	1	12312	1	0.13441	0.38179	0.60001	1	11905	3	0.13441
ARPC1B	6	0.1513	0.33702	1	5471	2	0.057892	0.36436	0.5813	1	11587	3	0.057892
ARPC2	6	0.040063	0.12494	0.88539	2874	2	-0.12559	0.084038	0.21703	0.938897	4681	2	-0.12559
ARPC3	6	0.00086996	0.0045509	0.095755	978	5	-0.94238	0.66694	0.79315	1	15500	1	-0.94238
ARPC4	6	4.89e-06	3.47e-05	0.003998	177	5	-1.3664	0.55927	0.71896	1	14168	1	-1.3664
ARPC4-TTLL3	3	0.0048058	0.01326	0.203958	1517	3	-0.89787	0.99519	0.9953	1	20062	0	-0.89787
ARPC5	6	0.94874	0.9488	1	19070	0	0.3237	0.012459	0.047643	0.82295	1166	4	0.3237
ARPC5L	6	0.16609	0.35492	1	5698	3	-0.18387	0.02202	0.078602	0.878761	1802	2	-0.18387
ARPP19	6	0.68512	0.80599	1	14932	2	-0.15274	0.44306	0.64606	1	12775	1	-0.15274
ARPP21	6	0.37812	0.59594	1	10053	3	-0.064865	0.67801	0.80123	1	15645	2	-0.064865
ARR3	6	0.75285	0.84135	1	15861	1	0.27512	0.081968	0.21296	0.937757	4599	4	0.27512
ARRB1	6	0.17169	0.3616	1	5784	3	-0.23841	0.30872	0.5205	1	10462	2	-0.23841
ARRB2	6	0.12205	0.2897	1	4792	4	-0.17837	0.71396	0.82794	1	16128	1	-0.17837
ARRDC1	5	0.38315	0.55805	1	10165	2	-0.041332	0.72689	0.79261	1	16298	1	-0.041332
ARRDC2	6	0.096397	0.2411	1	4186	4	-0.28304	0.92856	0.92951	1	18401	1	-0.28304
ARRDC3	6	0.96937	0.96938	1	19711	0	0.2783	0.03908	0.12362	0.902802	2763	4	0.2783
ARRDC4	6	0.27045	0.47658	1	7649	3	-0.20224	0.9771	0.97721	1	19448	0	-0.20224
ARRDC5	6	0.076034	0.20068	1	3691	3	-0.26916	0.22085	0.42101	0.991441	8659	2	-0.26916
ARSA	6	0.78038	0.85054	1	16136	1	0.1026	0.377	0.59489	1	11826	3	0.1026
ARSB	6	0.3793	0.59721	1	10073	2	0.10739	0.29577	0.50606	1	10199	3	0.10739
ARSD	6	0.69675	0.81472	1	15145	1	0.15485	0.6274	0.76517	1	14997	2	0.15485
ARSE	6	0.4094	0.62252	1	10645	2	0.17483	0.10578	0.25936	0.952549	5508	4	0.17483
ARSF	6	0.27607	0.48293	1	7781	3	-0.25914	0.011878	0.045723	0.82295	1113	2	-0.25914
ARSG	6	0.57764	0.72959	1	13096	2	0.093471	0.3178	0.53059	1	10633	2	0.093471
ARSH	6	0.42676	0.63293	1	10892	1	0.20215	0.022784	0.081006	0.878761	1865	5	0.20215
ARSI	6	0.89884	0.90638	1	17816	1	0.15713	0.14234	0.32685	0.966947	6874	4	0.15713
ARSJ	6	0.99858	0.99858	1	20641	0	0.43499	0.0014156	0.0072012	0.738121	192	6	0.43499
ARSK	6	0.24674	0.44921	1	7181	3	-0.29984	0.91066	0.91536	1	18079	1	-0.29984
ART1	6	0.95794	0.95789	1	19342	0	0.29439	0.029989	0.10304	0.88768	2354	5	0.29439
ART3	6	0.9397	0.93981	1	18807	0	0.35997	0.027841	0.096529	0.882131	2211	4	0.35997
ART4	6	0.37901	0.5969	1	10071	2	0.060121	0.34332	0.55849	1	11164	3	0.060121
ART5	6	0.69156	0.81082	1	15037	2	-0.0033782	0.056992	0.16223	0.924952	3557	2	-0.0033782
ARTN	6	0.047029	0.14017	0.941852	3021	2	-0.20683	0.92175	0.9238	1	18277	1	-0.20683
ARV1	6	0.74217	0.83799	1	15754	1	0.25145	0.078072	0.20523	0.93617	4450	4	0.25145
ARVCF	6	0.26618	0.47172	1	7566	2	0.28323	0.041024	0.12792	0.905155	2844	4	0.28323
ARX	6	0.70702	0.82261	1	15330	2	0.031781	0.16071	0.3508	0.97149	7336	2	0.031781
AS3MT	6	0.68535	0.80615	1	14936	2	-0.0019433	0.20788	0.40618	0.98778	8383	2	-0.0019433
ASAH1	6	0.025592	0.089649	0.722917	2531	4	-0.66129	0.91495	0.91852	1	18157	1	-0.66129
ASAH2	6	0.19284	0.38669	1	6164	2	0.1277	0.25589	0.46124	0.999519	9399	3	0.1277
ASAH2B	6	0.34308	0.55775	1	9239	3	-0.013183	0.13439	0.31251	0.961347	6605	2	-0.013183
ASAP1	6	0.41785	0.62759	1	10768	1	0.046253	0.43087	0.63868	1	12635	1	0.046253
ASAP2	6	0.60622	0.74924	1	13566	1	0.10234	0.91759	0.92052	1	18198	1	0.10234
ASAP3	6	0.94241	0.94253	1	18875	0	-0.032245	0.6099	0.75306	1	14767	2	-0.032245
ASB1	6	0.36607	0.58282	1	9773	3	-0.047003	0.39284	0.6119	1	12135	2	-0.047003
ASB10	6	0.92463	0.92582	1	18404	1	0.23672	0.087044	0.22297	0.940143	4804	4	0.23672
ASB11	6	0.94558	0.94564	1	18978	0	0.11461	0.1937	0.38968	0.984709	8080	3	0.11461
ASB12	6	0.75016	0.84049	1	15824	1	0.2552	0.046607	0.14001	0.909154	3104	3	0.2552
ASB13	6	0.89395	0.90321	1	17730	1	0.22198	0.082156	0.21334	0.937757	4607	4	0.22198
ASB14	6	0.17817	0.36929	1	5891	3	-0.098311	0.028477	0.098511	0.885234	2252	2	-0.098311
ASB15	6	0.94415	0.94423	1	18931	0	0.12873	0.20878	0.4072	0.98778	8407	3	0.12873
ASB16	6	0.12301	0.29148	1	4815	1	0.1087	0.63312	0.76915	1	15068	2	0.1087
ASB17	6	0.24903	0.45183	1	7226	1	0.48308	0.0073509	0.030252	0.788145	754	5	0.48308
ASB18	6	0.98415	0.98431	1	20150	0	0.75521	0.00047985	0.0025262	0.593014	84	5	0.75521
ASB2	6	0.57788	0.72974	1	13100	2	0.068257	0.11826	0.28281	0.953687	6020	3	0.068257
ASB3	6	0.37366	0.59101	1	9948	2	0.32552	0.0012601	0.0064498	0.738121	169	3	0.32552
ASB4	6	0.27179	0.47808	1	7687	2	0.098014	0.014055	0.052971	0.8357	1284	3	0.098014
ASB5	6	0.25031	0.45331	1	7251	3	-0.071587	0.50187	0.6821	1	13456	2	-0.071587
ASB6	6	0.31534	0.52714	1	8615	1	0.1556	0.12794	0.30069	0.956978	6380	3	0.1556
ASB7	6	0.93235	0.93267	1	18599	1	0.1381	0.30203	0.51303	1	10327	3	0.1381
ASB8	6	0.80551	0.85967	1	16436	1	0.03488	0.028892	0.09977	0.88576	2279	2	0.03488
ASB9	6	0.33648	0.55054	1	9088	3	-0.15871	0.3936	0.61266	1	12146	1	-0.15871
ASCC1	6	0.5569	0.71563	1	12755	1	0.31386	0.054699	0.15733	0.919011	3462	4	0.31386
ASCC2	6	0.35532	0.57115	1	9527	2	0.1821	0.048795	0.14468	0.911616	3205	3	0.1821
ASCC3	6	0.14697	0.3317	1	5396	3	-0.015641	0.16225	0.35262	0.97149	7383	3	-0.015641
ASCL1	6	0.13867	0.32026	1	5251	2	0.29389	0.084859	0.2187	0.938962	4717	4	0.29389
ASCL2	6	0.89961	0.9069	1	17830	1	-0.059342	0.53849	0.70551	1	13904	2	-0.059342
ASCL3	6	0.36473	0.5814	1	9740	3	-0.086739	0.22081	0.42096	0.991441	8658	2	-0.086739
ASCL4	6	0.29743	0.50695	1	8234	3	-0.13669	0.21579	0.41526	0.989388	8563	1	-0.13669
ASCL5	6	0.8975	0.9055	1	17799	1	0.13755	0.14287	0.32783	0.966947	6900	2	0.13755
ASF1A	6	0.37217	0.58941	1	9915	3	0.010242	0.065937	0.1807	0.926907	3942	3	0.010242
ASF1B	6	0.091645	0.23169	1	4060	4	-0.35741	0.42981	0.63804	1	12626	1	-0.35741
ASGR1	6	0.21072	0.40763	1	6505	3	-0.16843	0.05439	0.15667	0.919011	3441	2	-0.16843
ASGR2	6	0.48635	0.66982	1	11725	1	0.14679	0.24489	0.44857	0.997771	9158	3	0.14679
ASH1L	6	0.65243	0.78198	1	14373	2	0.22184	0.087823	0.22451	0.940208	4836	3	0.22184
ASH2L	6	0.00016682	0.00091429	0.031771	592	6	-1.5021	0.99983	0.99983	1	20497	0	-1.5021
ASIC1	6	0.82095	0.8659	1	16608	1	0.062275	0.9474	0.94746	1	18805	0	0.062275
ASIC2	6	0.021002	0.075337	0.65387	2357	4	-0.45478	0.95403	0.95409	1	18953	0	-0.45478
ASIC3	6	0.84099	0.87458	1	16863	1	0.21795	0.028759	0.099368	0.885454	2271	5	0.21795
ASIC4	6	0.84703	0.87739	1	16950	1	0.14567	0.048032	0.14306	0.911616	3165	3	0.14567
ASIC5	6	0.91969	0.92166	1	18280	1	0.10991	0.28532	0.49439	1	9977	3	0.10991
ASIP	6	0.41055	0.62321	1	10664	2	0.014779	0.89336	0.9039	1	17836	1	0.014779
ASL	6	0.959	0.95895	1	19374	0	0.2132	0.028624	0.098949	0.885454	2259	5	0.2132
ASMT_X	6	0.2304	0.43045	1	6860	1	0.29227	0.023233	0.082419	0.878761	1889	4	0.29227
ASMTL_X	6	0.84831	0.87801	1	16979	1	0.026132	0.65639	0.7855	1	15341	2	0.026132
ASNA1	6	2.02e-06	1.32e-05	0.00225	119	6	-1.6776	1	1	1	20651	0	-1.6776
ASNS	6	0.267	0.47263	1	7580	2	0.21355	0.39826	0.61756	1	12247	3	0.21355
ASNSD1	6	0.94227	0.94238	1	18870	0	0.27019	0.03233	0.10854	0.892609	2470	4	0.27019
ASPA	6	0.15074	0.33633	1	5464	3	-0.069174	0.30027	0.51107	1	10297	2	-0.069174
ASPDH	6	0.064461	0.17708	1	3430	4	-0.54928	0.21094	0.40969	0.988622	8451	2	-0.54928
ASPG	6	0.52292	0.69318	1	12226	2	0.071933	0.22072	0.42087	0.991441	8657	3	0.071933
ASPH	6	0.15261	0.33863	1	5490	1	0.44809	0.039362	0.12423	0.902802	2778	4	0.44809
ASPHD1	6	0.94121	0.94134	1	18844	0	0.2281	0.046541	0.13988	0.909154	3100	3	0.2281
ASPHD2	6	0.78975	0.85383	1	16260	1	0.32775	0.047781	0.14251	0.911467	3153	3	0.32775
ASPM	6	0.96783	0.96782	1	19660	0	0.15249	0.29043	0.50013	1	10087	3	0.15249
ASPRV1	6	0.76114	0.84404	1	15937	1	0.29256	0.11063	0.26855	0.953008	5713	4	0.29256
ASPSCR1	6	0.26061	0.46539	1	7441	2	0.10085	0.076297	0.2017	0.935411	4372	3	0.10085
ASRGL1	6	0.068722	0.18579	1	3523	4	-0.4301	0.28718	0.49646	1	10025	2	-0.4301
ASS1	6	0.24867	0.45142	1	7219	3	-0.16443	0.11032	0.26796	0.95295	5699	2	-0.16443
ASTE1	6	0.47087	0.66014	1	11513	2	0.091844	0.044834	0.13617	0.906716	3028	2	0.091844
ASTL	6	0.47373	0.66187	1	11547	2	-0.087215	0.55687	0.71746	1	14136	2	-0.087215
ASTN1	6	0.84233	0.87523	1	16886	1	0.17138	0.099735	0.24789	0.948582	5295	3	0.17138
ASTN2	6	0.98988	0.98997	1	20348	0	0.23226	0.12084	0.28759	0.953687	6122	4	0.23226
ASUN	6	0.0045993	0.020195	0.27593	1502	5	-0.58133	0.8047	0.86168	1	16885	1	-0.58133
ASXL1	6	0.33825	0.55247	1	9127	2	0.15263	0.067284	0.18346	0.926907	4010	3	0.15263
ASXL2	6	0.39014	0.60893	1	10331	3	-0.096794	0.9417	0.94184	1	18651	0	-0.096794
ASXL3	6	0.39087	0.60972	1	10346	3	0.00156	0.15113	0.33927	0.968745	7138	2	0.00156
ASZ1	6	0.92793	0.92867	1	18489	1	0.40647	0.0082635	0.03344	0.789725	858	5	0.40647
ATAD1	6	0.99191	0.99198	1	20425	0	0.55652	0.0019485	0.0097515	0.755869	256	4	0.55652
ATAD2	6	0.031514	0.10575	0.795448	2709	4	-1.1521	0.51201	0.68847	1	13576	1	-1.1521
ATAD2B	6	0.95796	0.95792	1	19344	0	0.12514	0.16738	0.35875	0.972052	7520	3	0.12514
ATAD3A	6	0.00011126	0.00061056	0.024119	524	5	-1.778	0.18095	0.37473	0.977937	7814	1	-1.778
ATAD3B	6	0.14564	0.3301	1	5381	3	-0.37254	0.65298	0.78315	1	15301	2	-0.37254
ATAD3C	6	0.23668	0.43766	1	6991	2	-0.10974	0.12033	0.28664	0.953687	6099	2	-0.10974
ATAD5	6	0.099399	0.24696	1	4247	4	-0.35929	0.2105	0.40918	0.988622	8441	2	-0.35929
ATAT1	6	0.56429	0.72052	1	12866	2	0.20924	0.33312	0.54743	1	10960	3	0.20924
ATCAY	6	0.36531	0.58201	1	9758	3	-0.20161	0.49364	0.67696	1	13361	1	-0.20161
ATE1	6	0.99841	0.99841	1	20633	0	0.48664	0.0015578	0.0078675	0.739089	215	6	0.48664
ATF1	6	0.44012	0.64113	1	11067	2	0.4981	0.0042338	0.018971	0.780362	486	4	0.4981
ATF2	6	0.35401	0.56969	1	9496	3	0.019183	0.33083	0.54493	1	10915	2	0.019183
ATF3	6	0.85912	0.88339	1	17141	1	0.10669	0.18597	0.38065	0.98218	7914	3	0.10669
ATF4	6	0.013544	0.051204	0.512532	2048	4	-1.1152	0.82132	0.86817	1	17036	1	-1.1152
ATF5	6	0.23351	0.43398	1	6929	3	-0.24159	0.38391	0.60233	1	11949	2	-0.24159
ATF6	6	0.62628	0.76335	1	13916	2	-0.10548	0.2365	0.43897	0.996252	8978	1	-0.10548
ATF6B	6	0.62136	0.75994	1	13804	2	0.30433	0.039587	0.12474	0.903742	2786	4	0.30433
ATF7	6	0.98945	0.98954	1	20338	0	0.12493	0.26442	0.47097	1	9577	3	0.12493
ATF7IP	6	0.044075	0.13377	0.919338	2958	3	-0.35041	0.138	0.31908	0.964185	6734	1	-0.35041
ATF7IP2	6	0.38586	0.60433	1	10228	3	0.051345	0.19776	0.39447	0.985485	8174	3	0.051345
ATG10	6	0.089784	0.22802	1	4012	3	-0.27705	0.82309	0.86888	1	17058	1	-0.27705
ATG12	6	0.14271	0.32653	1	5334	3	-0.19984	0.99226	0.99233	1	19942	0	-0.19984
ATG13	6	0.94016	0.94027	1	18819	0	0.10877	0.3611	0.57773	1	11518	3	0.10877
ATG14	6	0.86865	0.88831	1	17294	1	0.025903	0.3498	0.56558	1	11288	2	0.025903
ATG16L1	6	0.025926	0.090694	0.72851	2539	3	-0.17109	0.17072	0.36272	0.974737	7580	3	-0.17109
ATG16L2	6	0.83848	0.87346	1	16830	1	0.10103	0.092183	0.23312	0.94737	4979	1	0.10103
ATG2A	6	0.62979	0.76579	1	13981	2	0.20877	0.13385	0.31154	0.960485	6589	4	0.20877
ATG2B	6	0.99759	0.99764	1	20611	0	0.24992	0.0024062	0.011889	0.755869	300	6	0.24992
ATG3	6	0.024939	0.087667	0.712047	2514	5	-0.23668	0.9291	0.92999	1	18409	1	-0.23668
ATG4A	6	0.37769	0.59546	1	10039	1	0.33833	0.05474	0.15742	0.919011	3467	4	0.33833
ATG4B	6	0.39996	0.61685	1	10516	2	-0.059399	0.046125	0.13897	0.909154	3081	2	-0.059399
ATG4C	6	0.61276	0.75384	1	13667	1	0.12489	0.9283	0.92928	1	18399	1	0.12489
ATG4D	6	0.90172	0.90828	1	17878	1	0.012094	0.47836	0.66751	1	13195	2	0.012094
ATG5	6	0.23468	0.43532	1	6953	3	-0.053984	0.3891	0.60792	1	12057	2	-0.053984
ATG7	6	0.048277	0.14283	0.949435	3054	4	-0.32922	0.5966	0.74404	1	14627	2	-0.32922
ATG9A	6	0.86006	0.88384	1	17156	1	0.29917	0.041947	0.12992	0.905155	2895	4	0.29917
ATHL1	6	0.16962	0.35913	1	5754	2	-0.017967	0.63999	0.77395	1	15146	2	-0.017967
ATIC	6	0.012169	0.046574	0.484271	1969	4	-0.74272	0.9649	0.96488	1	19162	0	-0.74272
ATL1	6	0.18481	0.37718	1	6015	3	-0.016295	0.24174	0.44497	0.996252	9093	3	-0.016295
ATL2	6	0.075648	0.1999	1	3682	4	-0.32317	0.97948	0.97962	1	19529	0	-0.32317
ATL3	6	0.68162	0.80341	1	14866	2	0.075443	0.28431	0.49325	1	9952	3	0.075443
ATM	6	0.33224	0.54588	1	9005	2	0.22555	0.11537	0.27742	0.953687	5896	4	0.22555
ATMIN	6	0.054434	0.15605	0.987534	3202	3	0.043404	0.21147	0.4103	0.988622	8460	2	0.043404
ATN1	6	0.65531	0.78398	1	14425	1	0.12888	0.17186	0.36404	0.974884	7610	2	0.12888
ATOH1	6	0.54474	0.7076	1	12568	2	-0.0089905	0.69598	0.81443	1	15870	1	-0.0089905
ATOH7	6	0.96959	0.96961	1	19720	0	0.12838	0.35498	0.57117	1	11396	3	0.12838
ATOH8	6	0.60493	0.74836	1	13548	2	-0.056326	0.95401	0.95407	1	18952	0	-0.056326
ATOX1	6	0.24053	0.44209	1	7070	2	0.17535	0.10313	0.25435	0.952184	5415	3	0.17535
ATP10A	6	0.19355	0.38753	1	6174	3	0.022162	0.18766	0.38263	0.983012	7949	3	0.022162
ATP10B	6	0.1593	0.34674	1	5591	2	-0.0089365	0.20567	0.40362	0.98778	8335	2	-0.0089365
ATP10D	6	0.93595	0.93608	1	18701	1	0.052549	0.62656	0.76459	1	14985	2	0.052549
ATP11A	6	0.91914	0.92122	1	18266	1	0.0093918	0.3182	0.53104	1	10642	3	0.0093918
ATP11B	6	0.90328	0.9094	1	17908	1	-0.099231	0.59228	0.74113	1	14579	2	-0.099231
ATP11C	6	0.71178	0.8262	1	15419	2	0.13138	0.046011	0.13872	0.909154	3077	3	0.13138
ATP12A	6	0.34081	0.55527	1	9184	3	-0.04664	0.78211	0.85364	1	16687	1	-0.04664
ATP13A1	6	0.62602	0.76318	1	13909	2	0.19268	0.39376	0.61285	1	12152	3	0.19268
ATP13A2	6	0.3173	0.5293	1	8660	2	0.16994	0.034031	0.1124	0.896629	2547	3	0.16994
ATP13A3	6	0.54807	0.70978	1	12616	2	0.077092	0.38637	0.60501	1	12001	3	0.077092
ATP13A4	6	0.34709	0.56214	1	9337	2	0.04805	0.2839	0.49278	1	9942	3	0.04805
ATP13A5	6	0.26057	0.46534	1	7439	3	-0.25646	0.7151	0.8288	1	16146	1	-0.25646
ATP1A1	6	0.00084537	0.0044189	0.094202	965	4	-0.7952	0.0061712	0.026018	0.788145	651	1	-0.7952
ATP1A2	6	0.71143	0.82594	1	15412	1	-0.0051351	0.81084	0.86401	1	16939	1	-0.0051351
ATP1A3	6	0.86659	0.88721	1	17257	1	0.24372	0.01969	0.07127	0.878761	1641	4	0.24372
ATP1A4	6	0.53968	0.70425	1	12483	1	0.55409	0.0025801	0.012757	0.755869	334	5	0.55409
ATP1B1	6	0.4562	0.65103	1	11297	1	0.21377	0.12966	0.30385	0.957333	6438	4	0.21377
ATP1B2	6	0.99021	0.9903	1	20357	0	0.31587	0.024627	0.086753	0.879085	1989	5	0.31587
ATP1B3	6	3.43e-05	0.00019922	0.011749	350	5	-2.0342	0.75348	0.84435	1	16471	1	-2.0342
ATP1B4	6	0.18601	0.37863	1	6041	3	-0.037457	0.27168	0.47912	1	9718	3	-0.037457
ATP2A1	6	0.68531	0.80612	1	14935	1	0.16181	0.0014299	0.0072648	0.738121	193	3	0.16181
ATP2A2	6	6.94e-05	0.00037045	0.016743	455	6	-1.1428	0.99966	0.99966	1	20439	0	-1.1428
ATP2A3	6	0.33378	0.54754	1	9041	2	-0.12262	0.91964	0.92212	1	18224	1	-0.12262
ATP2B1	6	0.0016348	0.0082343	0.145064	1165	5	-0.90932	0.99028	0.99036	1	19852	0	-0.90932
ATP2B2	6	0.23048	0.43053	1	6863	1	0.40968	0.024454	0.086211	0.879085	1976	4	0.40968
ATP2B3	6	0.39306	0.61208	1	10399	2	0.1672	0.21428	0.41354	0.988622	8528	3	0.1672
ATP2B4	6	0.80507	0.8595	1	16432	1	0.44437	0.035602	0.11588	0.898617	2617	4	0.44437
ATP2C1	6	0.70856	0.82378	1	15359	2	-0.016503	0.11742	0.28124	0.953687	5984	2	-0.016503
ATP2C2	6	0.64317	0.77529	1	14219	2	0.030014	0.065406	0.17961	0.926907	3917	3	0.030014
ATP4A	6	0.50173	0.67958	1	11936	2	-0.0034779	0.25096	0.45547	0.998196	9292	2	-0.0034779
ATP4B	6	0.55463	0.71412	1	12721	2	0.091689	0.34521	0.56057	1	11197	3	0.091689
ATP5A1	6	2.26e-06	1.55e-05	0.002595	124	6	-1.7396	0.99979	0.99978	1	20482	0	-1.7396
ATP5B	6	0.00018543	0.0010348	0.034494	618	4	-1.4853	0.30814	0.51984	1	10452	1	-1.4853
ATP5C1	6	0.031048	0.10471	0.791413	2699	4	-0.58867	0.063855	0.1765	0.926907	3850	1	-0.58867
ATP5D	6	0.092443	0.23325	1	4078	3	-0.16277	0.63133	0.76788	1	15043	1	-0.16277
ATP5E	4	0.065089	0.15184	0.975523	3450	2	-0.32194	0.2976	0.44699	0.996947	10239	2	-0.32194
ATP5F1	6	0.00025905	0.0013979	0.042304	683	6	-0.91599	0.99974	0.99974	1	20464	0	-0.91599
ATP5G1	6	0.91707	0.91956	1	18217	1	0.37234	0.022412	0.079818	0.878761	1832	5	0.37234
ATP5G2	6	0.11877	0.28359	1	4713	3	-0.15044	0.038214	0.1217	0.902466	2724	3	-0.15044
ATP5G3	6	0.80212	0.85834	1	16392	1	0.16025	0.21859	0.41845	0.99055	8614	3	0.16025
ATP5H	6	0.0009607	0.0049981	0.101531	1016	6	-0.99101	0.99904	0.99903	1	20332	0	-0.99101
ATP5I	6	0.011203	0.043378	0.463082	1918	5	-0.39113	0.69891	0.81669	1	15914	1	-0.39113
ATP5J	6	0.0001736	0.00095638	0.032589	602	4	-1.1547	0.45101	0.65085	1	12859	1	-1.1547
ATP5J2	6	3.2e-05	0.00018678	0.011301	339	6	-1.9796	0.99997	0.99997	1	20563	0	-1.9796
ATP5J2-PTCD1	6	0.00043184	0.0022909	0.059055	798	3	-0.75374	0.62369	0.76267	1	14946	1	-0.75374
ATP5L	6	0.0034193	0.015872	0.231536	1405	5	-0.95574	0.59308	0.74166	1	14586	1	-0.95574
ATP5L2	6	0.33869	0.55296	1	9143	2	0.035566	0.57941	0.7324	1	14394	2	0.035566
ATP5O	6	5.64e-05	0.00031114	0.015224	417	5	-1.3374	0.99643	0.99647	1	20127	0	-1.3374
ATP5S	6	0.76068	0.8439	1	15934	1	0.21091	0.014271	0.053684	0.8357	1298	5	0.21091
ATP5SL	6	0.31138	0.52271	1	8519	2	-0.13371	0.41901	0.63165	1	12513	2	-0.13371
ATP6AP1	6	1.77e-06	1.17e-05	0.002109	115	5	-2.7743	0.6218	0.76137	1	14930	1	-2.7743
ATP6AP1L	6	0.48478	0.66883	1	11694	2	0.26279	0.31145	0.52356	1	10513	3	0.26279
ATP6AP2	6	0.00036748	0.0019527	0.053115	757	6	-1.1292	0.99746	0.99749	1	20198	0	-1.1292
ATP6V0A1	6	0.6453	0.77685	1	14251	1	-0.089477	0.78528	0.85472	1	16711	1	-0.089477
ATP6V0A2	6	0.85867	0.88316	1	17133	1	0.13361	0.24641	0.45026	0.997959	9188	3	0.13361
ATP6V0A4	6	0.93833	0.93846	1	18762	0	0.064232	0.2652	0.47182	1	9588	3	0.064232
ATP6V0B	6	2.66e-06	1.84e-05	0.002793	135	5	-2.5355	0.99214	0.99222	1	19937	0	-2.5355
ATP6V0C	6	2.04e-05	0.00011599	0.007872	304	6	-3.7746	0.99921	0.99922	1	20363	0	-3.7746
ATP6V0D1	6	0.00026181	0.0014156	0.042597	685	5	-2.2039	0.99339	0.99347	1	19976	0	-2.2039
ATP6V0D2	6	0.24369	0.44578	1	7111	2	0.20748	0.31605	0.52867	1	10604	3	0.20748
ATP6V0E1	6	0.023943	0.084598	0.699913	2469	4	-0.88243	0.46901	0.66178	1	13072	2	-0.88243
ATP6V0E2	6	0.86602	0.88692	1	17243	1	0.23885	0.12348	0.29247	0.9549	6217	4	0.23885
ATP6V1A	6	0.026393	0.092116	0.734797	2559	5	-0.38669	0.97607	0.97619	1	19423	0	-0.38669
ATP6V1B1	6	0.3688	0.5858	1	9843	3	0.21219	0.0136	0.051471	0.825153	1262	3	0.21219
ATP6V1B2	6	0.00038645	0.0020594	0.054863	774	5	-1.1385	0.91653	0.91971	1	18180	1	-1.1385
ATP6V1C1	6	0.17209	0.3621	1	5794	2	0.14816	0.28029	0.48879	1	9882	3	0.14816
ATP6V1C2	6	0.67	0.79482	1	14674	2	-0.050329	0.45276	0.65189	1	12878	2	-0.050329
ATP6V1D	6	0.084317	0.21716	1	3888	4	-0.33127	0.96741	0.96741	1	19221	0	-0.33127
ATP6V1E1	6	0.0054698	0.023336	0.304382	1568	4	-0.73938	0.9892	0.98928	1	19826	0	-0.73938
ATP6V1E2	6	0.366	0.58275	1	9770	3	-0.028303	0.0068631	0.028518	0.788145	719	2	-0.028303
ATP6V1F	6	0.033264	0.10974	0.813582	2748	3	-0.272	0.57465	0.72923	1	14336	1	-0.272
ATP6V1G1	6	0.010601	0.04138	0.447996	1894	5	-1.1542	0.98654	0.98663	1	19743	0	-1.1542
ATP6V1G2	6	0.12368	0.29272	1	4835	4	-0.23299	0.99354	0.99361	1	19983	0	-0.23299
ATP6V1G3	6	0.43745	0.63944	1	11036	2	0.38352	0.0082688	0.033458	0.789725	859	4	0.38352
ATP6V1H	6	0.025771	0.090199	0.725939	2536	4	-0.64988	0.95421	0.95428	1	18956	0	-0.64988
ATP7A	6	0.94241	0.94253	1	18876	0	0.045617	0.28655	0.49579	1	10006	2	0.045617
ATP7B	6	0.63829	0.77181	1	14134	2	0.21133	0.13587	0.31521	0.962717	6653	4	0.21133
ATP8A1	6	0.90819	0.91287	1	18009	1	0.0048494	0.61972	0.75993	1	14900	2	0.0048494
ATP8A2	6	0.18116	0.37285	1	5947	1	0.52829	0.03826	0.12181	0.902466	2727	4	0.52829
ATP8B1	4	0.0093908	0.031603	0.371585	1831	4	-0.51186	0.99061	0.99059	1	19869	0	-0.51186
ATP8B2	6	0.63748	0.77122	1	14123	1	0.12101	0.16243	0.35284	0.97149	7390	3	0.12101
ATP8B3	6	0.38853	0.6072	1	10295	3	-0.085782	0.43434	0.64077	1	12684	2	-0.085782
ATP8B4	6	0.97823	0.97836	1	19963	0	0.54708	0.0037704	0.017299	0.772563	449	5	0.54708
ATP9A	6	0.32001	0.53237	1	8719	2	0.044176	0.35895	0.57543	1	11482	3	0.044176
ATP9B	6	0.8124	0.86237	1	16501	1	0.02447	0.67243	0.79717	1	15572	2	0.02447
ATPAF1	6	0.34936	0.56468	1	9392	2	0.14762	0.35798	0.57436	1	11455	3	0.14762
ATPAF2	6	0.19793	0.39273	1	6263	2	0.029646	0.59687	0.74422	1	14631	2	0.029646
ATPBD4	6	0.029196	0.10049	0.770322	2659	3	-0.10279	0.42385	0.63453	1	12573	2	-0.10279
ATPIF1	6	0.27079	0.47696	1	7660	2	0.4159	0.032675	0.10931	0.893335	2486	4	0.4159
ATR	6	0.00061213	0.0032212	0.073695	898	5	-1.0186	0.89358	0.90404	1	17844	1	-1.0186
ATRAID	6	0.28505	0.49304	1	7955	2	0.060482	0.44756	0.64875	1	12823	2	0.060482
ATRIP	6	0.51699	0.6894	1	12145	2	0.0022516	0.67867	0.8017	1	15651	1	0.0022516
ATRN	6	0.078101	0.20479	1	3737	3	-0.14261	0.18154	0.37543	0.978414	7827	2	-0.14261
ATRNL1	6	0.39459	0.61368	1	10432	2	0.24085	0.078406	0.20591	0.936341	4466	4	0.24085
ATRX	6	0.37459	0.59206	1	9973	2	0.18911	0.082929	0.21487	0.937881	4639	4	0.18911
ATXN1	6	0.61965	0.75875	1	13778	1	0.064927	0.33891	0.55373	1	11078	2	0.064927
ATXN10	6	0.008467	0.034038	0.390349	1785	5	-0.65025	0.93888	0.93901	1	18593	1	-0.65025
ATXN1L	6	0.95827	0.95821	1	19354	0	0.25026	0.23968	0.4426	0.996252	9042	3	0.25026
ATXN2	6	0.42041	0.62913	1	10805	2	0.24516	0.2575	0.46307	1	9434	3	0.24516
ATXN2L	6	0.0095088	0.037651	0.420808	1838	4	-0.47486	0.96338	0.96337	1	19127	0	-0.47486
ATXN3	6	0.91649	0.91911	1	18204	1	0.22789	0.075878	0.20089	0.935411	4357	4	0.22789
ATXN3L	6	0.52315	0.69334	1	12232	2	0.054541	0.69584	0.81432	1	15868	2	0.054541
ATXN7	6	0.37734	0.59508	1	10033	3	-0.16368	0.023594	0.083565	0.878761	1914	2	-0.16368
ATXN7L1	6	0.21741	0.41538	1	6623	3	-0.15766	0.52402	0.69611	1	13706	1	-0.15766
ATXN7L2	5	0.85929	0.86492	1	17143	1	0.16275	0.12026	0.26302	0.952549	6095	3	0.16275
ATXN7L3	6	0.058743	0.16522	1	3298	4	-0.37221	0.38864	0.60741	1	12045	1	-0.37221
ATXN7L3B	6	0.52614	0.6953	1	12269	2	0.24321	0.040217	0.12612	0.904688	2811	3	0.24321
AUH	6	0.83327	0.87115	1	16763	1	0.44739	0.0024463	0.01209	0.755869	312	5	0.44739
AUNIP	6	0.022468	0.079957	0.679156	2408	5	-0.43517	0.71726	0.83045	1	16181	1	-0.43517
AUP1	6	0.052684	0.15236	0.976753	3167	4	-0.41577	0.5164	0.69132	1	13621	1	-0.41577
AURKA	6	0.00023595	0.0012725	0.039911	660	6	-0.81041	0.99976	0.99976	1	20478	0	-0.81041
AURKAIP1	6	0.0067117	0.027853	0.34319	1666	5	-0.59517	0.098492	0.24543	0.948582	5237	1	-0.59517
AURKB	6	0.03108	0.10477	0.791413	2702	3	-0.32972	0.22584	0.42682	0.992865	8760	2	-0.32972
AURKC	6	0.85818	0.88291	1	17125	1	0.038195	0.074295	0.19765	0.934942	4290	2	0.038195
AUTS2	6	0.97826	0.97838	1	19964	0	0.081802	0.1	0.24838	0.948602	5305	2	0.081802
AVEN	6	0.29902	0.50875	1	8280	3	-0.18148	0.78897	0.85603	1	16759	1	-0.18148
AVIL	6	0.96134	0.96132	1	19459	0	0.080641	0.031653	0.10702	0.890391	2436	3	0.080641
AVL9	6	0.70946	0.82443	1	15377	2	0.46141	0.02257	0.080303	0.878761	1847	4	0.46141
AVP	6	0.045206	0.13618	0.928302	2979	4	-0.39924	0.96956	0.96958	1	19268	0	-0.39924
AVPI1	6	0.88996	0.9006	1	17650	1	0.1661	0.2495	0.45378	0.998196	9257	3	0.1661
AVPR1A	6	0.45644	0.65118	1	11300	2	0.23582	0.11479	0.27633	0.953687	5876	4	0.23582
AVPR1B	6	0.52475	0.69437	1	12255	2	-0.0083908	0.27201	0.47948	1	9726	3	-0.0083908
AVPR2	6	0.99284	0.99291	1	20456	0	0.29196	0.1397	0.32218	0.965127	6792	4	0.29196
AWAT1	6	0.25803	0.46235	1	7391	2	0.062225	0.11846	0.28318	0.953687	6027	3	0.062225
AWAT2	6	0.60957	0.75157	1	13620	2	0.11923	0.19395	0.38996	0.984709	8083	3	0.11923
AXDND1	6	0.91464	0.9177	1	18155	1	-0.04251	0.62073	0.76064	1	14916	1	-0.04251
AXIN1	6	0.33759	0.55176	1	9114	2	-0.14534	0.86503	0.88794	1	17494	1	-0.14534
AXIN2	6	0.91488	0.91785	1	18162	1	0.0074782	0.56929	0.72569	1	14275	1	0.0074782
AXL	6	0.4444	0.64378	1	11134	1	-0.019159	0.4841	0.67103	1	13260	1	-0.019159
AZGP1	6	0.52994	0.69786	1	12326	2	-0.016545	0.10856	0.2646	0.952549	5631	2	-0.016545
AZI1	6	0.24029	0.4418	1	7062	3	-0.2541	0.71315	0.82734	1	16122	2	-0.2541
AZI2	6	0.27819	0.48537	1	7829	3	-0.17325	0.87482	0.89306	1	17593	1	-0.17325
AZIN1	6	0.071891	0.19226	1	3588	3	-0.37366	0.046889	0.14063	0.910014	3120	2	-0.37366
AZU1	6	0.68492	0.80585	1	14929	2	-0.0077222	0.5986	0.74536	1	14652	2	-0.0077222
B2M	6	0.34373	0.55844	1	9254	3	-0.17135	0.21262	0.41162	0.988622	8490	2	-0.17135
B3GALNT1	6	0.97687	0.977	1	19925	0	0.23083	0.077877	0.20485	0.936154	4443	3	0.23083
B3GALNT2	6	0.33976	0.55412	1	9166	2	-0.070815	0.40746	0.62483	1	12390	2	-0.070815
B3GALT1	6	0.013264	0.050282	0.50773	2027	5	-0.34745	0.10621	0.26018	0.952549	5521	1	-0.34745
B3GALT2	6	0.17169	0.3616	1	5783	3	-0.12454	0.8526	0.88181	1	17360	1	-0.12454
B3GALT4	6	0.18832	0.38135	1	6085	2	-0.095688	0.31211	0.5243	1	10524	1	-0.095688
B3GALT5	6	0.83616	0.87243	1	16804	1	0.17843	0.11523	0.27715	0.953687	5890	4	0.17843
B3GALT6	6	0.31422	0.52586	1	8583	2	0.37073	0.029183	0.10063	0.88579	2301	4	0.37073
B3GALTL	6	0.93477	0.93497	1	18675	1	-0.17653	0.59348	0.74192	1	14593	2	-0.17653
B3GAT1	6	0.085762	0.22005	1	3928	3	-0.26035	0.67254	0.79726	1	15575	1	-0.26035
B3GAT2	6	0.14606	0.3306	1	5386	3	-0.26587	0.58299	0.73478	1	14441	1	-0.26587
B3GAT3	6	0.13691	0.31707	1	5192	3	-0.039883	0.15048	0.33847	0.968698	7121	3	-0.039883
B3GNT1	6	0.090486	0.22942	1	4032	4	-0.28175	0.91177	0.91618	1	18093	1	-0.28175
B3GNT2	6	0.96316	0.96313	1	19511	0	0.29391	0.00062103	0.0032657	0.656017	102	3	0.29391
B3GNT3	6	0.30894	0.51993	1	8468	3	-0.30482	0.2879	0.49729	1	10039	2	-0.30482
B3GNT4	6	0.11138	0.26974	1	4526	3	-0.30403	0.51787	0.69224	1	13634	2	-0.30403
B3GNT5	6	0.94596	0.946	1	18988	0	0.37142	0.015926	0.059112	0.83838	1427	5	0.37142
B3GNT6	6	0.17575	0.36644	1	5857	2	0.0091305	0.39134	0.61029	1	12102	2	0.0091305
B3GNT7	6	0.071348	0.19116	1	3575	4	-0.26107	0.91153	0.916	1	18088	1	-0.26107
B3GNT8	6	0.13899	0.32084	1	5261	4	-0.26938	0.89478	0.90475	1	17862	1	-0.26938
B3GNT9	6	0.62051	0.75935	1	13792	2	0.13722	0.073456	0.19595	0.933957	4257	3	0.13722
B3GNTL1	6	0.40543	0.62014	1	10581	2	0.42192	0.013636	0.051582	0.825153	1269	4	0.42192
B4GALNT1	6	0.96896	0.96895	1	19699	0	0.25339	0.27211	0.4796	1	9728	2	0.25339
B4GALNT2	6	0.96305	0.96303	1	19509	0	0.28139	0.25225	0.45699	0.998441	9318	3	0.28139
B4GALNT3	6	0.039689	0.1241	0.882149	2865	2	0.017924	0.217	0.41663	0.989779	8582	2	0.017924
B4GALNT4	6	0.65921	0.78684	1	14485	1	-0.015875	0.34952	0.56527	1	11280	2	-0.015875
B4GALT1	6	0.049404	0.14523	0.957707	3079	4	-0.34124	0.78102	0.85329	1	16679	1	-0.34124
B4GALT2	6	0.39417	0.61324	1	10422	2	0.21698	0.079409	0.20784	0.936355	4505	3	0.21698
B4GALT3	6	0.92232	0.92381	1	18341	1	0.29289	0.02674	0.093182	0.880591	2136	3	0.29289
B4GALT4	6	0.24436	0.44651	1	7125	1	0.36351	0.010843	0.042268	0.818644	1049	4	0.36351
B4GALT5	6	0.99713	0.99718	1	20591	0	0.27181	0.022086	0.078792	0.878761	1810	5	0.27181
B4GALT6	6	0.96724	0.96724	1	19635	0	0.23265	0.12405	0.29353	0.955477	6238	4	0.23265
B4GALT7	6	0.027037	0.094055	0.744385	2576	4	-0.43379	0.34386	0.55908	1	11174	2	-0.43379
B9D1	6	0.38235	0.6005	1	10149	1	0.22659	0.11018	0.2677	0.95295	5695	4	0.22659
B9D2	6	0.022567	0.080262	0.68091	2411	4	-0.47541	0.47469	0.66523	1	13147	2	-0.47541
BAALC	6	0.85039	0.87901	1	17010	1	-0.059608	0.21546	0.41488	0.989159	8557	2	-0.059608
BAAT	6	0.22043	0.4188	1	6682	3	0.00045979	0.24105	0.44419	0.996252	9068	3	0.00045979
BABAM1	6	0.77838	0.84983	1	16107	1	-0.036443	0.54035	0.70673	1	13938	2	-0.036443
BACE1	6	0.58328	0.73341	1	13194	1	0.24775	0.036039	0.11689	0.898617	2638	3	0.24775
BACE2	6	0.48275	0.66754	1	11667	1	0.081087	0.048745	0.14458	0.911616	3201	2	0.081087
BACH1	6	0.27656	0.48349	1	7794	3	0.037601	0.038881	0.12318	0.902802	2754	3	0.037601
BACH2	6	0.051358	0.14951	0.972296	3127	4	-0.51941	0.4216	0.6332	1	12541	2	-0.51941
BAD	6	0.082909	0.21438	1	3856	3	-0.50256	0.89588	0.90546	1	17881	1	-0.50256
BAG1	6	0.77639	0.84913	1	16088	1	0.44876	0.0063109	0.026514	0.788145	665	5	0.44876
BAG2	6	0.26366	0.46882	1	7508	3	-0.25323	0.92127	0.92343	1	18262	1	-0.25323
BAG3	6	0.51689	0.68933	1	12144	1	0.20014	0.1444	0.33057	0.96726	6955	4	0.20014
BAG4	6	0.062645	0.17335	1	3372	4	-0.39997	0.43579	0.64161	1	12703	1	-0.39997
BAG5	6	0.50833	0.68379	1	12037	2	0.026029	0.64518	0.77764	1	15212	2	0.026029
BAG6	6	0.33598	0.54996	1	9077	3	0.10348	0.0075547	0.030976	0.788145	780	3	0.10348
BAGE	6	0.0008584	0.0044978	0.095393	970	5	-1.012	0.19104	0.38657	0.983976	8022	1	-1.012
BAGE2	6	0.052509	0.152	0.975931	3160	3	-0.50001	0.61047	0.75345	1	14779	1	-0.50001
BAGE3	2	0.037518	0.067882	0.612527	2829	2	-1.9887	0.92203	0.92198	1	18281	0	-1.9887
BAHCC1	6	0.36511	0.58179	1	9751	3	-0.10814	0.68379	0.80546	1	15711	2	-0.10814
BAHD1	6	0.60505	0.74845	1	13550	1	0.2479	0.15193	0.34024	0.96949	7153	3	0.2479
BAI1	6	0.17267	0.36278	1	5802	3	-0.28582	0.45698	0.65443	1	12926	2	-0.28582
BAI2	6	0.83864	0.87354	1	16832	1	0.28418	0.070806	0.1906	0.929985	4168	4	0.28418
BAI3	6	0.55401	0.71372	1	12706	2	-0.012506	0.24779	0.45179	0.998196	9214	2	-0.012506
BAIAP2	6	0.95653	0.95653	1	19307	0	0.043458	0.42046	0.63249	1	12529	2	0.043458
BAIAP2L1	6	0.99559	0.99565	1	20547	0	0.35182	0.025476	0.089317	0.879085	2047	5	0.35182
BAIAP2L2	6	0.55122	0.71188	1	12663	1	0.39622	0.0034562	0.016151	0.770387	413	5	0.39622
BAIAP3	6	0.84261	0.87537	1	16888	1	0.60605	0.0012689	0.0064909	0.738121	171	5	0.60605
BAK1	6	0.79189	0.85462	1	16275	1	-0.033399	0.83383	0.87336	1	17161	1	-0.033399
BAMBI	6	0.21769	0.41569	1	6628	2	-0.05533	0.86187	0.88634	1	17467	1	-0.05533
BANF1	6	8.43e-05	0.00044554	0.019254	478	4	-1.987	0.29584	0.50613	1	10201	1	-1.987
BANF2	6	0.4693	0.65919	1	11492	2	-0.056365	0.21826	0.41809	0.990276	8607	1	-0.056365
BANK1	6	0.26173	0.46666	1	7469	3	-0.060026	0.28258	0.49133	1	9927	3	-0.060026
BANP	6	0.039334	0.12331	0.879328	2855	4	-0.37196	0.34208	0.55715	1	11138	2	-0.37196
BAP1	6	0.0069564	0.028739	0.351386	1681	4	-0.76845	0.95863	0.95859	1	19042	0	-0.76845
BARD1	6	7.78e-05	0.00040584	0.017989	465	5	-3.96	0.98213	0.98232	1	19613	0	-3.96
BARHL1	6	0.0037723	0.017176	0.245031	1439	5	-0.4699	0.90419	0.91089	1	17995	1	-0.4699
BARHL2	6	0.91513	0.91806	1	18173	1	0.1961	0.14367	0.32927	0.96726	6933	4	0.1961
BARX1	6	0.62571	0.76296	1	13899	2	0.38179	0.081936	0.2129	0.937757	4596	4	0.38179
BARX2	6	0.5277	0.69636	1	12286	2	0.18585	0.17353	0.36602	0.975546	7648	3	0.18585
BASP1	6	0.45952	0.65306	1	11339	1	0.057329	0.3703	0.58767	1	11703	2	0.057329
BATF	6	0.59917	0.74438	1	13454	1	0.12144	0.25927	0.46509	1	9469	3	0.12144
BATF2	6	0.42299	0.63072	1	10840	1	0.099784	0.61109	0.7539	1	14785	2	0.099784
BATF3	6	0.97349	0.97356	1	19814	0	0.38422	0.096951	0.24251	0.948582	5169	4	0.38422
BAX	6	0.43914	0.64052	1	11053	2	0.17433	0.19237	0.38815	0.984396	8053	3	0.17433
BAZ1A	6	0.99116	0.99123	1	20397	0	0.47501	0.0092272	0.036769	0.805857	932	5	0.47501
BAZ1B	6	0.079401	0.20735	1	3773	4	-0.32175	0.74582	0.84201	1	16418	1	-0.32175
BAZ2A	6	0.055937	0.15932	0.998545	3232	4	-0.55561	0.54764	0.71146	1	14023	1	-0.55561
BAZ2B	6	0.17483	0.36534	1	5843	2	0.044358	0.12621	0.29753	0.956978	6304	3	0.044358
BBC3	6	0.14702	0.33175	1	5397	3	-0.14314	0.3499	0.56569	1	11290	2	-0.14314
BBIP1	6	0.47693	0.66393	1	11591	1	0.32823	0.076872	0.20285	0.935411	4399	4	0.32823
BBOX1	6	0.94885	0.94889	1	19071	0	0.20036	0.081124	0.21124	0.936766	4572	4	0.20036
BBS1	6	0.92415	0.92538	1	18396	1	0.25804	0.22902	0.43049	0.99323	8829	3	0.25804
BBS10	6	0.96596	0.96594	1	19597	0	0.21748	0.027463	0.095375	0.882131	2186	3	0.21748
BBS12	6	0.30816	0.51907	1	8454	2	0.061607	0.39989	0.61927	1	12289	3	0.061607
BBS2	6	0.9069	0.91198	1	17986	1	-0.015045	0.55793	0.71814	1	14149	2	-0.015045
BBS4	6	0.11131	0.2696	1	4521	3	0.022015	0.096866	0.24234	0.948582	5165	3	0.022015
BBS5	6	0.94487	0.94495	1	18953	0	0.34837	0.016059	0.059522	0.839141	1437	4	0.34837
BBS7	6	0.035836	0.11551	0.84266	2792	4	-0.4304	0.77108	0.84999	1	16602	1	-0.4304
BBS9	6	0.92354	0.92486	1	18374	1	0.18407	0.33245	0.54668	1	10952	3	0.18407
BBX	6	0.48554	0.6693	1	11709	2	-0.14695	0.88432	0.89838	1	17716	1	-0.14695
BCAM	6	0.012574	0.047967	0.49203	1996	4	-0.46688	0.63975	0.77378	1	15144	1	-0.46688
BCAN	6	0.26487	0.47023	1	7528	3	0.011157	0.086307	0.22155	0.939755	4774	3	0.011157
BCAP29	6	0.3804	0.59838	1	10107	2	0.084567	0.072896	0.19481	0.933041	4232	3	0.084567
BCAP31	6	0.10549	0.2586	1	4388	3	-0.16858	0.806	0.86218	1	16895	1	-0.16858
BCAR1	6	0.97425	0.97433	1	19839	0	0.65129	0.0040238	0.018235	0.780362	470	5	0.65129
BCAR3	6	0.99835	0.99835	1	20630	0	0.48851	0.0016549	0.0083357	0.746113	227	6	0.48851
BCAS1	6	0.35488	0.57067	1	9513	1	0.23011	0.12076	0.28744	0.953687	6118	4	0.23011
BCAS2	6	0.00014825	0.00081623	0.029436	570	5	-1.094	0.93883	0.93897	1	18589	1	-1.094
BCAS3	6	0.28932	0.49791	1	8050	3	0.042659	0.21172	0.41058	0.988622	8469	3	0.042659
BCAS4	6	0.89613	0.9046	1	17772	1	-0.0061497	0.48943	0.67434	1	13319	1	-0.0061497
BCAT1	6	0.8616	0.88463	1	17176	1	0.033116	0.84082	0.87637	1	17230	1	0.033116
BCAT2	6	0.53181	0.69909	1	12361	2	-0.031539	0.074248	0.19756	0.934942	4287	2	-0.031539
BCCIP	6	0.14357	0.3276	1	5346	3	-0.27543	0.84145	0.87665	1	17239	1	-0.27543
BCDIN3D	6	0.31804	0.53014	1	8679	3	-0.012996	0.20328	0.40092	0.98778	8275	3	-0.012996
BCHE	6	0.24789	0.45048	1	7205	3	0.046948	0.004588	0.020281	0.780362	521	3	0.046948
BCKDHA	6	0.70355	0.81995	1	15265	2	-0.020328	0.20377	0.40146	0.98778	8285	2	-0.020328
BCKDHB	6	0.96314	0.96311	1	19510	0	-0.010048	0.97668	0.9768	1	19437	0	-0.010048
BCKDK	6	0.64622	0.77751	1	14270	2	-0.010283	0.86881	0.88987	1	17533	1	-0.010283
BCL10	6	0.11843	0.28295	1	4704	4	-0.30307	0.97931	0.97944	1	19522	0	-0.30307
BCL11A	6	0.2561	0.46016	1	7358	3	-0.2329	0.92754	0.92863	1	18386	1	-0.2329
BCL11B	6	0.37734	0.59508	1	10032	2	0.0026836	0.52461	0.69649	1	13713	1	0.0026836
BCL2	6	1.19e-05	7.87e-05	0.006515	249	6	-2.0921	0.99902	0.99901	1	20328	0	-2.0921
BCL2A1	6	0.34886	0.56411	1	9380	3	-0.22225	0.30175	0.51272	1	10323	1	-0.22225
BCL2L1	6	0.17246	0.36253	1	5799	3	-0.013722	0.32742	0.54121	1	10851	3	-0.013722
BCL2L10	6	0.47242	0.66107	1	11526	1	0.30497	0.064122	0.177	0.926907	3863	4	0.30497
BCL2L11	6	0.94309	0.94318	1	18895	0	0.32668	0.022003	0.078545	0.878761	1800	4	0.32668
BCL2L12	6	0.53898	0.70378	1	12471	2	-0.08824	0.52648	0.69771	1	13735	2	-0.08824
BCL2L13	6	0.66145	0.78847	1	14531	2	0.19458	0.083833	0.21663	0.938324	4676	3	0.19458
BCL2L14	6	0.55616	0.71513	1	12744	2	0.016561	0.48877	0.67395	1	13308	2	0.016561
BCL2L15	6	0.26616	0.4717	1	7564	3	-0.20278	0.58672	0.73731	1	14493	1	-0.20278
BCL2L2	6	0.95483	0.95486	1	19256	0	0.33711	0.08484	0.21866	0.938962	4716	4	0.33711
BCL2L2-PABPN1	6	2.48e-10	2.39e-07	0.000236	3	6	-2.4562	0.99852	0.99851	1	20286	0	-2.4562
BCL3	6	0.92613	0.92708	1	18444	1	0.1206	0.3414	0.5564	1	11120	3	0.1206
BCL6	6	0.28766	0.49601	1	8009	3	-0.19178	0.59689	0.74424	1	14633	2	-0.19178
BCL6B	6	0.62784	0.76444	1	13943	2	0.052454	0.11303	0.27309	0.953687	5794	2	0.052454
BCL7A	6	0.95889	0.95884	1	19370	0	0.12957	0.24723	0.45118	0.99818	9204	2	0.12957
BCL7B	6	0.93692	0.93704	1	18716	1	0.19098	0.015002	0.05613	0.836024	1356	3	0.19098
BCL7C	6	0.60805	0.75055	1	13592	2	0.11131	0.11001	0.26737	0.95295	5689	3	0.11131
BCL9	6	0.87072	0.88942	1	17331	1	0.5704	0.00071491	0.0037516	0.656017	114	4	0.5704
BCL9L	6	0.95158	0.95166	1	19150	0	0.59054	0.00032872	0.0017623	0.55363	65	4	0.59054
BCLAF1	6	0.047064	0.14025	0.941852	3023	3	-0.53445	0.57669	0.73059	1	14357	2	-0.53445
BCMO1	6	0.39818	0.61582	1	10486	2	0.07491	0.12216	0.29005	0.954074	6170	3	0.07491
BCO2	6	0.44527	0.64431	1	11149	2	0.15434	0.0011673	0.006004	0.735398	162	3	0.15434
BCOR	6	0.6504	0.78055	1	14341	1	0.33293	0.044539	0.13557	0.906716	3014	4	0.33293
BCORL1	6	0.76863	0.8465	1	16014	1	0.15731	0.26058	0.46663	1	9487	3	0.15731
BCR	6	0.12087	0.28749	1	4766	3	-0.32399	0.97615	0.97626	1	19425	0	-0.32399
BCS1L	6	0.0048126	0.020983	0.28389	1518	4	-1.084	0.45417	0.65274	1	12893	2	-1.084
BDH1	6	0.17919	0.37053	1	5911	3	-0.25838	0.54573	0.71023	1	14000	1	-0.25838
BDH2	6	0.10709	0.26158	1	4428	4	-0.28891	0.93983	0.93995	1	18613	1	-0.28891
BDKRB1	6	0.26824	0.47408	1	7606	2	-0.045904	0.14635	0.33346	0.968054	7014	1	-0.045904
BDKRB2	6	0.15381	0.3401	1	5506	3	-0.097182	0.40839	0.62537	1	12401	2	-0.097182
BDNF	6	0.35571	0.57158	1	9536	3	-0.034785	0.61383	0.7558	1	14825	2	-0.034785
BDP1	6	0.1644	0.35289	1	5677	3	-0.42824	0.98301	0.98319	1	19637	0	-0.42824
BEAN1	6	0.33154	0.54511	1	8991	3	-0.040298	0.5869	0.73744	1	14496	2	-0.040298
BECN1	6	0.018546	0.06754	0.610779	2264	5	-0.4349	0.78057	0.85315	1	16675	1	-0.4349
BEGAIN	6	0.83017	0.86976	1	16721	1	0.16414	0.19456	0.39069	0.984709	8100	3	0.16414
BEND2	5	0.1052	0.23915	1	4380	2	0.12942	0.23055	0.4189	0.990602	8864	3	0.12942
BEND3	6	0.23337	0.43383	1	6926	3	0.11054	0.09915	0.24678	0.948582	5273	3	0.11054
BEND4	6	0.6959	0.81408	1	15128	2	0.038511	0.54314	0.70856	1	13973	2	0.038511
BEND5	6	0.52058	0.69167	1	12196	2	0.11289	0.39586	0.61504	1	12198	3	0.11289
BEND6	6	0.51796	0.69003	1	12159	2	0.14264	0.34771	0.56332	1	11248	3	0.14264
BEND7	6	0.9792	0.97933	1	19989	0	0.2518	0.036535	0.11797	0.898617	2660	3	0.2518
BEST1	6	0.05613	0.15972	1	3233	4	-0.43075	0.53174	0.70118	1	13805	1	-0.43075
BEST2	6	0.7055	0.82141	1	15295	2	0.30589	0.086774	0.22244	0.940143	4790	4	0.30589
BEST3	6	0.26437	0.46969	1	7523	3	-0.13044	0.34113	0.55612	1	11112	2	-0.13044
BEST4	6	0.0017763	0.0089102	0.153573	1192	6	-0.57807	0.99822	0.99823	1	20250	0	-0.57807
BET1	6	0.0087008	0.03483	0.397756	1798	4	-0.42363	0.86087	0.88582	1	17452	1	-0.42363
BET1L	6	0.027436	0.095287	0.749981	2590	4	-0.4932	0.94766	0.94772	1	18813	0	-0.4932
BET3L	6	0.054973	0.15723	0.991648	3212	4	-0.32155	0.81425	0.86533	1	16970	1	-0.32155
BEX1	6	0.82176	0.86624	1	16618	1	0.19726	0.10605	0.25988	0.952549	5516	4	0.19726
BEX2	6	0.67614	0.79934	1	14783	2	0.24054	0.19416	0.39023	0.984709	8091	3	0.24054
BEX4	6	0.85747	0.88255	1	17116	1	0.50063	0.0003416	0.001825	0.563839	67	5	0.50063
BEX5	6	0.14082	0.32414	1	5309	3	-0.28216	0.90776	0.91334	1	18044	1	-0.28216
BFAR	6	0.52898	0.69723	1	12307	2	-0.041869	0.29394	0.50404	1	10167	1	-0.041869
BFSP1	6	0.3762	0.59384	1	10005	2	-0.12133	0.49766	0.67948	1	13411	1	-0.12133
BFSP2	6	0.15736	0.34439	1	5561	3	-0.21322	0.71294	0.82718	1	16116	1	-0.21322
BGLAP	6	0.57684	0.72907	1	13075	1	0.18194	0.22548	0.42639	0.992865	8747	3	0.18194
BGN	6	0.9735	0.97356	1	19815	0	0.21323	0.37808	0.59606	1	11851	3	0.21323
BHLHA15	6	0.88421	0.89709	1	17555	1	0.43949	0.011609	0.044831	0.82295	1099	4	0.43949
BHLHA9	6	0.14207	0.3257	1	5326	3	-0.019545	0.61144	0.75414	1	14794	2	-0.019545
BHLHB9	6	0.96983	0.96984	1	19729	0	0.16027	0.069166	0.18726	0.927316	4108	3	0.16027
BHLHE22	6	0.98737	0.98746	1	20271	0	0.58278	0.0048356	0.021197	0.782477	541	4	0.58278
BHLHE40	6	0.1901	0.38343	1	6116	3	-0.080604	0.53121	0.70082	1	13800	1	-0.080604
BHLHE41	6	0.94712	0.94716	1	19022	0	0.45866	0.021585	0.077213	0.878761	1769	4	0.45866
BHMT	6	0.76129	0.84408	1	15939	1	0.24696	0.027067	0.094153	0.88103	2157	3	0.24696
BHMT2	6	0.30447	0.5149	1	8387	2	0.22885	0.062443	0.17357	0.926907	3788	4	0.22885
BICC1	6	0.73173	0.83485	1	15676	1	0.047703	0.22185	0.42216	0.992179	8677	2	0.047703
BICD1	6	0.068484	0.1853	1	3520	3	-0.29244	0.84655	0.87898	1	17289	1	-0.29244
BICD2	6	0.061871	0.17175	1	3366	4	-0.35249	0.72794	0.83675	1	16302	1	-0.35249
BID	6	0.70004	0.8173	1	15199	2	-0.09554	0.41731	0.63062	1	12495	2	-0.09554
BIK	6	0.33263	0.54629	1	9016	1	0.19514	0.021799	0.0779	0.878761	1789	4	0.19514
BIN1	6	0.33165	0.54524	1	8994	3	0.044534	0.15426	0.34306	0.970105	7198	3	0.044534
BIN2	6	0.24902	0.45182	1	7225	2	-0.052909	0.34204	0.55711	1	11136	1	-0.052909
BIN3	6	0.12444	0.29411	1	4859	3	-0.36382	0.014301	0.053776	0.8357	1301	2	-0.36382
BIRC2	6	0.97099	0.97102	1	19754	0	0.26321	0.024365	0.085929	0.878761	1973	5	0.26321
BIRC3	6	0.56902	0.72379	1	12948	1	0.0069064	0.44224	0.64553	1	12769	2	0.0069064
BIRC5	6	0.00024675	0.0013304	0.041043	671	6	-1.9219	0.99966	0.99966	1	20436	0	-1.9219
BIRC6	6	0.98288	0.98305	1	20108	0	0.41578	0.0039059	0.017803	0.780055	460	5	0.41578
BIRC7	6	0.98226	0.98245	1	20083	0	0.15939	0.26416	0.47067	1	9570	3	0.15939
BIRC8	6	0.24912	0.45194	1	7230	3	-0.34694	0.252	0.45669	0.998441	9313	1	-0.34694
BIVM	6	0.20296	0.39867	1	6358	3	-0.19772	0.47687	0.6666	1	13176	1	-0.19772
BIVM-ERCC5	3	0.65455	0.665	1	14410	1	0.15796	0.21973	0.33936	0.968745	8637	2	0.15796
BLCAP	6	0.31512	0.52688	1	8608	2	0.25668	0.024268	0.08563	0.878761	1967	3	0.25668
BLID	6	0.1549	0.34142	1	5532	2	-0.046072	0.40762	0.62492	1	12394	1	-0.046072
BLK	6	0.29506	0.50433	1	8164	2	-0.040517	0.64461	0.77723	1	15201	1	-0.040517
BLM	6	0.084176	0.21687	1	3884	3	-0.2955	0.038037	0.1213	0.901678	2717	2	-0.2955
BLMH	6	0.73464	0.83571	1	15699	1	0.062777	0.26229	0.46854	1	9523	2	0.062777
BLNK	6	0.28655	0.49477	1	7989	1	0.21362	0.10738	0.26237	0.952549	5574	4	0.21362
BLOC1S1	6	0.21934	0.41757	1	6665	2	0.058353	0.27087	0.47823	1	9706	3	0.058353
BLOC1S2	6	0.61393	0.75467	1	13688	2	0.0024319	0.28891	0.49841	1	10053	2	0.0024319
BLOC1S3	6	0.7679	0.84625	1	16007	1	0.016259	0.14173	0.32575	0.966884	6852	2	0.016259
BLOC1S4	6	0.54956	0.71078	1	12637	2	-0.10013	0.76583	0.84823	1	16558	1	-0.10013
BLOC1S5	6	0.62086	0.75961	1	13796	2	0.10533	0.021427	0.076733	0.878761	1756	3	0.10533
BLOC1S6	6	0.94569	0.94575	1	18981	0	-0.095773	0.017635	0.06466	0.860835	1530	2	-0.095773
BLVRA	6	0.28238	0.49006	1	7907	2	-0.087062	0.96086	0.96083	1	19084	0	-0.087062
BLVRB	6	0.95647	0.95647	1	19305	0	0.33139	0.027937	0.096825	0.882131	2216	3	0.33139
BLZF1	6	0.90653	0.91171	1	17974	1	0.075732	0.56697	0.72411	1	14250	2	0.075732
BMF	6	0.92549	0.92655	1	18422	1	0.27891	0.1111	0.26943	0.953534	5728	4	0.27891
BMI1	6	0.060404	0.16867	1	3334	3	-0.2575	0.75918	0.84612	1	16504	1	-0.2575
BMP1	6	0.094807	0.23796	1	4138	4	-0.21712	0.97368	0.97375	1	19369	0	-0.21712
BMP10	6	0.38086	0.59888	1	10115	2	0.013781	0.1179	0.28214	0.953687	6002	3	0.013781
BMP15	6	0.98852	0.98863	1	20305	0	0.17181	0.050185	0.14766	0.915341	3263	3	0.17181
BMP2	6	0.51724	0.68955	1	12147	2	0.0035699	0.92979	0.93058	1	18429	1	0.0035699
BMP2K	6	0.50245	0.68002	1	11953	1	0.35729	0.045408	0.13741	0.907894	3054	4	0.35729
BMP3	6	0.41168	0.6239	1	10681	1	0.17827	0.27665	0.4847	1	9812	3	0.17827
BMP4	6	0.80215	0.85835	1	16393	1	0.21321	0.072974	0.19496	0.933041	4238	3	0.21321
BMP5	6	0.88961	0.90036	1	17643	1	0.02578	0.38791	0.60664	1	12030	1	0.02578
BMP6	6	0.017504	0.064165	0.589935	2227	4	-0.50535	0.6404	0.77423	1	15148	2	-0.50535
BMP7	6	0.57883	0.73039	1	13117	1	0.31903	0.049535	0.14626	0.912495	3238	4	0.31903
BMP8A	6	0.32558	0.5385	1	8852	3	-0.14818	0.53987	0.70641	1	13931	2	-0.14818
BMP8B	5	0.060409	0.1652	1	3336	4	-0.58526	0.59159	0.72931	1	14571	1	-0.58526
BMPER	6	0.053546	0.15416	0.981588	3184	2	0.20155	0.14294	0.32795	0.966947	6904	4	0.20155
BMPR1A	6	0.68191	0.80363	1	14871	1	0.20064	0.00981	0.038804	0.812698	973	5	0.20064
BMPR1B	6	0.93536	0.93552	1	18686	1	0.20602	0.1145	0.2758	0.953687	5864	4	0.20602
BMPR2	6	0.4132	0.62481	1	10700	2	-0.036763	0.54951	0.71267	1	14046	2	-0.036763
BMS1	6	2.85e-05	0.00016239	0.010094	332	5	-1.1714	0.99502	0.99506	1	20050	0	-1.1714
BMX	6	0.52837	0.69679	1	12296	2	0.0036246	0.42537	0.63542	1	12588	2	0.0036246
BNC1	6	0.92477	0.92594	1	18408	1	0.053245	0.22714	0.42835	0.992865	8793	2	0.053245
BNC2	6	0.96169	0.96167	1	19467	0	0.046043	0.53634	0.7041	1	13870	2	0.046043
BNIP1	6	0.0030752	0.014597	0.2188	1366	5	-0.8383	0.76328	0.8474	1	16536	1	-0.8383
BNIP2	6	0.40967	0.62268	1	10652	1	0.13763	0.076457	0.20202	0.935411	4380	3	0.13763
BNIP3	6	0.18494	0.37736	1	6019	3	0.0038395	0.062678	0.17405	0.926907	3793	3	0.0038395
BNIP3L	6	0.1208	0.28736	1	4764	4	-0.30096	0.85237	0.8817	1	17355	1	-0.30096
BNIPL	6	0.28173	0.48932	1	7894	3	0.091092	0.15862	0.34829	0.971479	7296	3	0.091092
BOC	6	0.043812	0.13319	0.917246	2954	3	-0.29571	0.20217	0.39966	0.98746	8262	1	-0.29571
BOD1	6	0.17239	0.36244	1	5798	3	0.094552	0.057869	0.16406	0.926425	3592	3	0.094552
BOD1L1	6	0.0003883	0.0020704	0.055027	775	3	-0.28782	0.27392	0.48163	1	9764	2	-0.28782
BOD1L2	6	0.66751	0.79297	1	14631	2	0.22725	0.02301	0.08173	0.878761	1879	4	0.22725
BOK	6	0.53668	0.70224	1	12441	1	0.22798	0.15762	0.3471	0.971104	7274	3	0.22798
BOLA1	6	0.15639	0.34321	1	5549	3	0.016604	0.35528	0.57149	1	11399	3	0.016604
BOLA2	6	0.0023582	0.011674	0.186745	1286	4	-0.58139	0.78621	0.85504	1	16722	1	-0.58139
BOLA3	6	0.19929	0.39429	1	6284	2	-0.049326	0.32238	0.53566	1	10742	2	-0.049326
BOLL	6	0.36498	0.58165	1	9746	3	0.14419	0.033493	0.11117	0.896082	2517	3	0.14419
BOP1	6	0.10171	0.25129	1	4298	3	-0.18078	0.12669	0.29841	0.956978	6322	2	-0.18078
BORA	6	0.0060723	0.025531	0.322797	1617	2	-0.045606	0.61669	0.75783	1	14864	2	-0.045606
BPGM	6	0.94539	0.94545	1	18973	0	0.12545	0.061453	0.1715	0.926907	3743	3	0.12545
BPHL	6	0.92801	0.92873	1	18496	1	0.22911	0.086844	0.22257	0.940143	4795	3	0.22911
BPI	6	0.68001	0.8022	1	14839	2	0.31875	0.076566	0.20224	0.935411	4385	4	0.31875
BPIFA1	6	0.95639	0.95638	1	19299	0	0.02484	0.13867	0.32029	0.964265	6757	2	0.02484
BPIFA2	5	0.95014	0.95029	1	19107	0	0.14801	0.20483	0.38397	0.983012	8314	3	0.14801
BPIFA3	6	0.21676	0.41462	1	6613	3	-0.23262	0.16681	0.35807	0.972052	7500	2	-0.23262
BPIFB1	6	0.042413	0.1301	0.906362	2921	4	-0.42615	0.92639	0.92764	1	18362	1	-0.42615
BPIFB2	6	0.75048	0.84059	1	15830	1	0.15805	0.10781	0.26319	0.952549	5599	4	0.15805
BPIFB3	6	0.38459	0.60295	1	10204	2	0.068479	0.60874	0.75228	1	14755	2	0.068479
BPIFB4	6	0.57648	0.72882	1	13067	2	0.052946	0.38472	0.60318	1	11971	2	0.052946
BPIFB6	6	0.09138	0.2312	1	4049	4	-0.35495	0.00096867	0.0050373	0.695149	144	1	-0.35495
BPIFC	6	0.027672	0.095993	0.752672	2598	5	-0.44816	0.94947	0.94951	1	18862	0	-0.44816
BPNT1	6	0.64269	0.77494	1	14213	1	0.23861	0.084823	0.21862	0.938962	4713	3	0.23861
BPTF	6	0.36946	0.58651	1	9858	3	-0.12612	0.44836	0.64924	1	12837	2	-0.12612
BPY2	6	0.90175	0.9083	1	17879	1	0.18415	0.077519	0.20414	0.935411	4427	4	0.18415
BPY2C	2	0.58783	0.58799	1	13279	1	0.069799	0.45156	0.46463	1	12864	1	0.069799
BRAF	6	0.1902	0.38357	1	6119	2	0.078668	0.32684	0.54057	1	10839	3	0.078668
BRAP	6	0.0013939	0.0070893	0.128952	1131	5	-0.72261	0.9632	0.96318	1	19123	0	-0.72261
BRAT1	6	0.0008399	0.0043969	0.093927	962	6	-0.87409	0.99916	0.99917	1	20350	0	-0.87409
BRCA1	6	0.00025155	0.0013596	0.041756	673	5	-0.90986	0.93966	0.93976	1	18612	1	-0.90986
BRCA2	6	0.15599	0.34271	1	5543	3	-0.19891	0.3881	0.60684	1	12034	2	-0.19891
BRCC3	6	0.43812	0.63986	1	11045	2	0.26478	0.096076	0.24081	0.948582	5134	3	0.26478
BRD1	6	0.093475	0.23527	1	4097	4	-0.37012	0.97151	0.97156	1	19311	0	-0.37012
BRD2	6	0.0078419	0.031872	0.372918	1746	5	-0.52372	0.99519	0.99524	1	20059	0	-0.52372
BRD3	6	0.36184	0.57824	1	9669	2	0.039461	0.33093	0.54503	1	10918	3	0.039461
BRD4	6	0.0018357	0.0091976	0.157707	1200	4	-0.58428	0.78809	0.85572	1	16747	1	-0.58428
BRD7	6	0.21891	0.41708	1	6656	2	0.012637	0.51523	0.69054	1	13604	2	0.012637
BRD8	6	0.076259	0.20111	1	3694	3	-0.41815	0.86863	0.88977	1	17531	1	-0.41815
BRD9	6	2.53e-05	0.00014134	0.00903	323	6	-1.1052	0.99997	0.99998	1	20571	0	-1.1052
BRDT	6	0.31768	0.52973	1	8668	3	-0.11679	0.69524	0.81386	1	15858	2	-0.11679
BRE	6	0.43192	0.63609	1	10958	2	-0.068466	0.13228	0.30867	0.959488	6534	2	-0.068466
BRF1	6	4.62e-05	0.00025948	0.013667	392	5	-1.0226	0.93399	0.93435	1	18503	1	-1.0226
BRF2	6	0.0004597	0.0024291	0.061545	812	5	-0.95898	0.92779	0.92885	1	18391	1	-0.95898
BRI3	6	0.3034	0.51369	1	8355	3	-0.12371	0.00042234	0.0022469	0.579738	76	3	-0.12371
BRI3BP	6	0.55201	0.7124	1	12674	2	0.16859	0.033645	0.11154	0.896082	2527	3	0.16859
BRICD5	6	0.61397	0.75469	1	13689	2	0.024317	0.84279	0.87729	1	17249	1	0.024317
BRINP1	6	0.50292	0.68032	1	11959	2	0.03774	0.27321	0.48084	1	9754	3	0.03774
BRINP2	6	0.46632	0.65733	1	11455	2	0.29744	0.05299	0.15371	0.919011	3380	4	0.29744
BRINP3	6	0.68207	0.80375	1	14874	2	0.16806	0.10018	0.24871	0.948723	5308	3	0.16806
BRIP1	6	6.67e-06	4.81e-05	0.004694	210	4	-1.8055	0.055167	0.15836	0.920432	3485	1	-1.8055
BRIX1	6	0.0017586	0.0088332	0.152499	1190	6	-0.93306	0.99824	0.99824	1	20252	0	-0.93306
BRK1	6	0.23487	0.43553	1	6956	2	0.015888	0.28185	0.4905	1	9912	2	0.015888
BRMS1	6	0.0027191	0.013282	0.203958	1333	5	-0.76237	0.99384	0.99391	1	19995	0	-0.76237
BRMS1L	6	0.86944	0.88871	1	17313	1	0.41785	0.0318	0.10737	0.890391	2445	4	0.41785
BROX	6	0.25866	0.46309	1	7399	3	-0.21644	0.37801	0.596	1	11849	2	-0.21644
BRPF1	6	0.0051042	0.022021	0.29352	1535	4	-0.70687	0.70981	0.82483	1	16074	1	-0.70687
BRPF3	6	0.469	0.65899	1	11490	2	-0.013359	0.4323	0.63952	1	12653	2	-0.013359
BRS3	6	0.70395	0.82024	1	15274	2	0.13553	0.37438	0.59203	1	11782	3	0.13553
BRSK1	6	0.18757	0.38048	1	6070	2	0.38643	0.039281	0.12406	0.902802	2774	4	0.38643
BRSK2	6	0.27366	0.4802	1	7730	1	0.24926	0.07622	0.20154	0.935411	4370	4	0.24926
BRWD1	6	0.22399	0.42297	1	6747	3	-0.22939	0.18323	0.37738	0.979791	7859	2	-0.22939
BRWD3	6	0.078029	0.20466	1	3734	3	-0.30542	0.23484	0.43705	0.994786	8955	2	-0.30542
BSCL2	6	0.86204	0.88484	1	17187	1	0.17487	0.019364	0.070221	0.878761	1626	3	0.17487
BSDC1	6	0.44133	0.64191	1	11079	2	-0.05069	0.68054	0.80306	1	15672	2	-0.05069
BSG	6	0.64928	0.77973	1	14315	2	0.32788	0.038805	0.12299	0.902802	2748	3	0.32788
BSN	6	0.66372	0.79013	1	14575	1	0.63778	0.0052476	0.022652	0.782477	569	4	0.63778
BSND	6	0.58167	0.73236	1	13169	1	0.14257	0.35581	0.57206	1	11407	3	0.14257
BSPH1	5	0.98433	0.98439	1	20158	0	0.3541	0.024785	0.07777	0.878761	2002	4	0.3541
BSPRY	6	0.65455	0.78346	1	14411	1	0.037914	0.013761	0.051977	0.828272	1274	3	0.037914
BST1	6	0.56919	0.7239	1	12953	2	0.10017	0.28181	0.49047	1	9910	2	0.10017
BST2	6	0.12303	0.29153	1	4816	3	-0.15373	0.48041	0.66877	1	13215	2	-0.15373
BSX	6	0.66048	0.78777	1	14511	2	-0.046643	0.55181	0.71417	1	14069	2	-0.046643
BTAF1	6	0.00018589	0.0010367	0.034502	620	5	-1.1245	0.94267	0.94278	1	18676	0	-1.1245
BTBD1	6	0.35024	0.56564	1	9420	1	0.017393	0.45321	0.65216	1	12882	1	0.017393
BTBD10	6	0.2468	0.44927	1	7183	2	0.15852	0.13398	0.31177	0.960662	6592	4	0.15852
BTBD11	6	0.62623	0.76331	1	13914	2	0.16409	0.058647	0.16568	0.926805	3629	3	0.16409
BTBD16	6	0.50066	0.67891	1	11925	2	0.13367	0.054645	0.15722	0.919011	3457	3	0.13367
BTBD17	6	0.4931	0.67409	1	11816	1	0.049332	0.35755	0.57392	1	11448	2	0.049332
BTBD18	6	0.62949	0.76558	1	13976	2	0.15281	0.089165	0.22719	0.942102	4879	3	0.15281
BTBD2	6	0.20251	0.39816	1	6352	2	0.052118	0.51059	0.6876	1	13559	2	0.052118
BTBD3	6	0.86288	0.88529	1	17196	1	0.18763	0.11043	0.26816	0.95295	5706	4	0.18763
BTBD6	6	0.2493	0.45215	1	7235	2	0.038104	0.66236	0.78981	1	15433	2	0.038104
BTBD7	6	0.31518	0.52695	1	8611	3	-0.20729	0.51789	0.69225	1	13635	1	-0.20729
BTBD8	6	0.748	0.83981	1	15806	1	0.089249	0.25919	0.465	1	9465	3	0.089249
BTBD9	6	0.53031	0.6981	1	12334	1	0.39018	0.015784	0.058662	0.83838	1414	5	0.39018
BTC	6	0.98644	0.98653	1	20240	0	0.14164	0.26781	0.47479	1	9644	3	0.14164
BTD	6	0.30868	0.51966	1	8465	2	0.23575	0.0029037	0.014073	0.759612	365	3	0.23575
BTF3	6	0.017538	0.064276	0.590293	2230	4	-0.57615	0.72519	0.836	1	16284	1	-0.57615
BTF3L4	6	0.3048	0.51527	1	8393	3	-0.078467	0.69048	0.81039	1	15795	2	-0.078467
BTG1	6	0.23107	0.43121	1	6871	3	0.03051	0.20053	0.3977	0.986266	8232	3	0.03051
BTG2	6	0.98352	0.98368	1	20135	0	0.21166	0.098732	0.24589	0.948582	5251	4	0.21166
BTG3	6	0.018452	0.067238	0.609115	2260	5	-0.45431	0.97519	0.97531	1	19403	0	-0.45431
BTG4	6	0.99956	0.99955	1	20674	0	0.3352	0.00044312	0.0023492	0.579738	80	6	0.3352
BTK	6	0.89748	0.90547	1	17797	1	0.27899	0.045816	0.1383	0.909132	3068	4	0.27899
BTLA	6	0.028724	0.099257	0.766077	2641	5	-0.25549	0.92386	0.92553	1	18309	1	-0.25549
BTN1A1	6	0.91109	0.915	1	18069	1	0.20217	0.1427	0.32753	0.966947	6892	4	0.20217
BTN2A1	6	0.65605	0.78453	1	14438	1	-0.034618	0.69939	0.81706	1	15919	1	-0.034618
BTN2A2	6	0.38418	0.60251	1	10192	3	-0.15416	0.43859	0.64329	1	12737	1	-0.15416
BTN3A1	6	0.48124	0.6666	1	11646	2	0.12871	0.71309	0.82729	1	16120	2	0.12871
BTN3A2	6	0.6646	0.79078	1	14584	1	0.16224	0.00031704	0.001704	0.55363	61	4	0.16224
BTN3A3	6	0.18569	0.37826	1	6030	3	-0.24417	0.77819	0.85233	1	16656	1	-0.24417
BTNL3	6	0.92003	0.92193	1	18289	1	0.027098	0.12784	0.30052	0.956978	6374	2	0.027098
BTNL8	6	0.10108	0.25014	1	4289	4	-0.33514	0.95169	0.95175	1	18903	0	-0.33514
BTNL9	6	0.16166	0.34956	1	5633	3	-0.021429	0.16622	0.35737	0.972052	7488	3	-0.021429
BTRC	6	0.30102	0.51103	1	8312	2	-0.040549	0.50492	0.68401	1	13491	2	-0.040549
BUB1	6	0.0014439	0.0073318	0.131857	1142	4	-0.81237	0.88877	0.90099	1	17778	1	-0.81237
BUB1B	6	0.00026321	0.0014246	0.042597	688	5	-1.4228	0.99601	0.99605	1	20105	0	-1.4228
BUB3	6	0.00024292	0.0013108	0.040797	665	5	-1.4677	0.95959	0.95952	1	19062	0	-1.4677
BUD13	6	0.56175	0.71879	1	12827	2	-0.081378	0.48952	0.67439	1	13321	2	-0.081378
BUD31	6	0.010306	0.040376	0.44012	1882	4	-0.97045	0.65015	0.78117	1	15268	1	-0.97045
BVES	6	0.59282	0.74003	1	13362	2	0.29387	0.098854	0.24616	0.948582	5257	4	0.29387
BYSL	6	0.53903	0.70382	1	12472	2	0.037275	0.87297	0.89204	1	17572	1	0.037275
BZRAP1	6	0.94072	0.94083	1	18833	0	0.10576	0.057156	0.16258	0.925351	3561	2	0.10576
BZW1	6	0.36587	0.58262	1	9766	3	-0.18882	0.33039	0.54447	1	10905	2	-0.18882
BZW2	6	0.92821	0.92891	1	18503	1	0.22806	0.048608	0.14429	0.911616	3193	4	0.22806
C10orf10	6	0.34653	0.56151	1	9326	3	-0.18721	0.74635	0.84215	1	16422	1	-0.18721
C10orf105	6	0.9776	0.97773	1	19944	0	0.36313	0.0029644	0.014305	0.761193	372	5	0.36313
C10orf107	6	0.83599	0.87236	1	16800	1	0.19967	0.032964	0.10999	0.894631	2498	3	0.19967
C10orf11	6	0.51315	0.68689	1	12101	2	-0.016872	0.39152	0.61049	1	12106	2	-0.016872
C10orf111	6	0.92162	0.92326	1	18328	1	0.16448	0.21231	0.41128	0.988622	8485	3	0.16448
C10orf113	6	0.091628	0.23167	1	4059	4	-0.3228	0.15935	0.34916	0.97149	7312	2	-0.3228
C10orf114	6	0.046588	0.1392	0.939163	3008	3	-0.30374	0.50771	0.68578	1	13525	2	-0.30374
C10orf118	6	0.27173	0.47802	1	7685	2	-0.015057	0.30376	0.51494	1	10366	2	-0.015057
C10orf12	6	0.21188	0.40897	1	6527	2	-0.12852	0.61577	0.75716	1	14849	1	-0.12852
C10orf120	6	0.98149	0.98167	1	20057	0	0.27921	0.084412	0.21781	0.938962	4696	4	0.27921
C10orf128	6	0.10809	0.26347	1	4452	3	-0.44904	0.47458	0.66516	1	13143	2	-0.44904
C10orf129	6	0.97925	0.97938	1	19990	0	0.14493	0.12874	0.30216	0.957333	6412	3	0.14493
C10orf131	5	0.79314	0.82265	1	16289	1	0.32994	0.25066	0.4458	0.996252	9284	3	0.32994
C10orf137	6	0.57651	0.72884	1	13068	2	0.086283	0.19286	0.3887	0.984709	8061	3	0.086283
C10orf2	6	2.73e-06	1.89e-05	0.002793	138	4	-1.336	0.5885	0.7385	1	14522	2	-1.336
C10orf25	6	0.91064	0.91464	1	18056	1	0.28645	0.046572	0.13994	0.909154	3102	4	0.28645
C10orf32	6	0.35031	0.56571	1	9425	2	-0.081718	0.18603	0.38073	0.98218	7916	2	-0.081718
C10orf35	6	0.9423	0.94241	1	18871	0	0.28681	0.054537	0.15698	0.919011	3450	4	0.28681
C10orf53	6	0.6933	0.81212	1	15067	2	0.031352	0.32571	0.53928	1	10809	3	0.031352
C10orf54	6	0.23337	0.43382	1	6925	2	-0.087669	0.69306	0.81228	1	15830	2	-0.087669
C10orf55	6	0.96823	0.96821	1	19669	0	0.50298	0.010065	0.039661	0.812698	993	4	0.50298
C10orf62	6	0.96205	0.96204	1	19477	0	0.31531	0.173	0.36539	0.975366	7635	3	0.31531
C10orf67	6	0.90579	0.91116	1	17958	1	0.2217	0.026289	0.091819	0.880389	2105	5	0.2217
C10orf68	6	0.66729	0.7928	1	14628	2	0.17025	0.30892	0.52072	1	10466	3	0.17025
C10orf71	6	0.051176	0.14913	0.971982	3118	4	-0.6912	0.56483	0.72266	1	14228	2	-0.6912
C10orf76	6	0.00014898	0.0008191	0.029488	571	5	-1.4839	0.95643	0.95642	1	18999	0	-1.4839
C10orf82	6	0.65796	0.78592	1	14468	2	0.25689	0.12987	0.30426	0.957333	6448	4	0.25689
C10orf88	6	0.59308	0.7402	1	13367	2	-0.084895	0.40999	0.62632	1	12419	1	-0.084895
C10orf90	6	0.58215	0.73266	1	13173	2	-0.016195	0.16446	0.35527	0.97149	7447	2	-0.016195
C10orf91	6	0.34286	0.5575	1	9234	2	0.28587	0.082011	0.21304	0.937757	4601	4	0.28587
C10orf95	6	0.31768	0.52973	1	8667	3	-0.14444	0.56518	0.72288	1	14235	1	-0.14444
C10orf99	6	0.85666	0.88214	1	17103	1	0.15134	0.21129	0.41009	0.988622	8456	3	0.15134
C11orf1	6	0.52064	0.69171	1	12198	2	-0.1558	0.94718	0.94722	1	18798	0	-0.1558
C11orf16	6	0.35701	0.57296	1	9558	2	0.22987	0.094684	0.23804	0.948582	5068	4	0.22987
C11orf21	6	0.96079	0.96076	1	19439	0	0.00035823	0.41214	0.62759	1	12445	2	0.00035823
C11orf24	6	0.96455	0.96454	1	19552	0	-0.06021	0.73996	0.84025	1	16380	1	-0.06021
C11orf30	6	0.035522	0.1148	0.839971	2783	4	-0.64852	0.52223	0.69496	1	13680	1	-0.64852
C11orf31	6	0.1875	0.38038	1	6067	2	0.089779	0.39598	0.61516	1	12199	2	0.089779
C11orf35	6	0.67052	0.79521	1	14681	2	0.62494	0.019246	0.069836	0.878761	1618	4	0.62494
C11orf40	6	0.34666	0.56166	1	9328	1	0.058198	0.25481	0.46001	0.99876	9383	3	0.058198
C11orf42	6	0.33433	0.54814	1	9051	3	0.013266	0.36784	0.58503	1	11651	3	0.013266
C11orf45	6	0.19218	0.38592	1	6152	3	-0.11071	0.70769	0.82328	1	16045	1	-0.11071
C11orf48	6	0.64558	0.77704	1	14257	2	-0.19094	0.39726	0.61651	1	12227	1	-0.19094
C11orf49	6	0.24603	0.44841	1	7159	3	-0.0867	0.45581	0.65374	1	12911	2	-0.0867
C11orf52	6	0.84762	0.87768	1	16964	1	0.19775	0.16958	0.36134	0.973868	7561	3	0.19775
C11orf53	6	0.91368	0.91695	1	18134	1	0.03384	0.55437	0.71583	1	14097	2	0.03384
C11orf54	6	0.87551	0.89205	1	17408	1	-0.024873	0.49785	0.6796	1	13413	1	-0.024873
C11orf57	6	0.52659	0.6956	1	12271	1	0.10857	0.39543	0.6146	1	12187	3	0.10857
C11orf58	6	0.66191	0.78881	1	14539	2	0.098173	0.2189	0.41879	0.990602	8621	2	0.098173
C11orf63	6	0.51596	0.68872	1	12133	2	-0.12798	0.54017	0.7066	1	13935	2	-0.12798
C11orf65	6	0.83596	0.87235	1	16799	1	0.14623	0.3429	0.55804	1	11153	2	0.14623
C11orf68	6	0.90468	0.91038	1	17934	1	0.3922	0.01556	0.057958	0.836121	1402	5	0.3922
C11orf70	6	0.66528	0.79129	1	14596	2	0.059402	0.19203	0.38774	0.984253	8044	2	0.059402
C11orf71	6	0.8999	0.9071	1	17836	1	0.4139	0.04729	0.14148	0.910154	3139	4	0.4139
C11orf73	6	0.056557	0.16063	1	3248	4	-0.37282	0.98316	0.98333	1	19644	0	-0.37282
C11orf74	6	0.78961	0.85379	1	16254	1	0.21108	0.1603	0.35029	0.97149	7328	3	0.21108
C11orf80	6	0.94602	0.94607	1	18992	0	0.3107	0.051864	0.15135	0.918956	3332	4	0.3107
C11orf82	6	0.21303	0.41031	1	6547	3	-0.12619	0.6906	0.81047	1	15798	2	-0.12619
C11orf83	6	0.12941	0.30331	1	4986	4	-0.20846	0.98701	0.98709	1	19759	0	-0.20846
C11orf84	6	0.96944	0.96946	1	19713	0	0.41588	0.0072981	0.030068	0.788145	749	4	0.41588
C11orf85	6	0.34422	0.55898	1	9269	3	-0.010853	0.22791	0.42923	0.992865	8810	3	-0.010853
C11orf86	6	0.89316	0.90271	1	17717	1	0.14812	0.24261	0.446	0.996252	9120	3	0.14812
C11orf87	6	0.23047	0.43052	1	6862	2	-0.076209	0.54602	0.71041	1	14007	2	-0.076209
C11orf88	6	0.93753	0.93767	1	18736	1	0.12343	0.72429	0.83574	1	16275	1	0.12343
C11orf91	6	0.51132	0.68569	1	12076	2	0.14535	0.39369	0.61277	1	12148	3	0.14535
C11orf93	6	0.71445	0.82823	1	15479	1	0.2019	0.28064	0.48918	1	9887	3	0.2019
C11orf94	6	0.41703	0.62707	1	10756	2	-0.10961	0.92155	0.92365	1	18274	1	-0.10961
C11orf96	6	0.88876	0.89982	1	17632	1	0.40401	0.0057321	0.024419	0.782477	622	3	0.40401
C12orf10	6	0.076881	0.20236	1	3706	3	-0.27497	0.94397	0.94405	1	18710	0	-0.27497
C12orf23	6	0.62587	0.76307	1	13904	2	-0.0020762	0.50212	0.68226	1	13459	1	-0.0020762
C12orf29	6	0.58807	0.73672	1	13283	1	0.17361	0.023253	0.08248	0.878761	1890	3	0.17361
C12orf39	6	0.36916	0.58621	1	9851	2	0.071714	0.038534	0.1224	0.902802	2736	2	0.071714
C12orf4	6	0.1617	0.3496	1	5634	3	-0.24851	0.19245	0.38824	0.984396	8056	1	-0.24851
C12orf40	6	0.99098	0.99104	1	20390	0	0.34772	0.014525	0.054531	0.8357	1319	5	0.34772
C12orf42	6	0.60691	0.74971	1	13579	2	0.18544	0.1419	0.32606	0.966884	6860	4	0.18544
C12orf43	6	0.38636	0.60489	1	10238	2	0.02332	0.36864	0.5859	1	11665	2	0.02332
C12orf44	6	0.93085	0.93128	1	18562	1	-0.10548	0.26856	0.47567	1	9663	2	-0.10548
C12orf45	6	0.00049934	0.0026309	0.064911	833	5	-1.6149	0.98374	0.98388	1	19660	0	-1.6149
C12orf49	6	0.039398	0.12345	0.879328	2857	4	-0.43087	0.88167	0.89684	1	17677	1	-0.43087
C12orf5	6	0.2942	0.50338	1	8137	3	-0.14225	0.1168	0.2801	0.953687	5959	2	-0.14225
C12orf50	6	0.67475	0.79831	1	14763	2	-0.032316	0.20956	0.40809	0.98778	8425	2	-0.032316
C12orf52	6	0.9993	0.99931	1	20661	0	0.38763	0.00069549	0.0036445	0.656017	110	6	0.38763
C12orf54	4	0.67693	0.71891	1	14797	1	0.22444	0.045829	0.11542	0.898617	3069	2	0.22444
C12orf56	6	0.69776	0.81553	1	15165	2	0.17037	0.31773	0.53051	1	10630	3	0.17037
C12orf57	6	0.16895	0.3583	1	5740	3	0.026129	0.28303	0.49181	1	9934	3	0.026129
C12orf60	6	0.96862	0.96861	1	19684	0	0.25418	0.012188	0.046721	0.82295	1142	5	0.25418
C12orf61	6	0.85181	0.87971	1	17029	1	0.1752	0.036914	0.11881	0.899525	2676	3	0.1752
C12orf65	6	0.68887	0.80881	1	14989	1	0.31171	0.075741	0.20061	0.935411	4349	4	0.31171
C12orf66	6	0.4565	0.65122	1	11302	2	0.27982	0.063587	0.17591	0.926907	3835	3	0.27982
C12orf68	6	0.96799	0.96798	1	19661	0	0.11816	0.92213	0.92409	1	18283	1	0.11816
C12orf71	6	0.33284	0.54653	1	9022	3	-0.046498	0.10739	0.26239	0.952549	5576	3	-0.046498
C12orf73	6	0.1815	0.37328	1	5960	2	0.11834	0.042006	0.13004	0.905155	2901	3	0.11834
C12orf74	6	0.013243	0.050211	0.507506	2024	3	-0.38639	0.42416	0.63471	1	12576	2	-0.38639
C12orf75	6	0.32198	0.53452	1	8768	3	-0.095809	0.87728	0.89438	1	17624	1	-0.095809
C12orf76	6	0.98341	0.98359	1	20129	0	0.19778	0.36885	0.58613	1	11673	3	0.19778
C12orf77	6	0.96905	0.96904	1	19702	0	0.24462	0.076669	0.20245	0.935411	4392	4	0.24462
C12orf79	6	0.28303	0.49077	1	7917	1	0.1632	0.2589	0.46466	1	9461	3	0.1632
C13orf35	6	0.35725	0.57321	1	9561	3	-0.0066621	0.1255	0.2962	0.956978	6285	3	-0.0066621
C13orf45	6	0.38487	0.60323	1	10209	2	0.15195	0.14165	0.32563	0.966884	6850	4	0.15195
C14orf1	6	0.18481	0.37718	1	6014	3	-0.14399	0.59397	0.74225	1	14597	2	-0.14399
C14orf105	6	0.16012	0.34772	1	5607	2	-0.18315	0.48671	0.67265	1	13283	2	-0.18315
C14orf119	6	0.83292	0.87097	1	16758	1	0.35534	0.035707	0.11612	0.898617	2623	4	0.35534
C14orf132	6	0.27931	0.48662	1	7848	1	0.17279	0.072593	0.19422	0.933041	4219	3	0.17279
C14orf142	6	0.085463	0.21944	1	3917	2	0.18285	0.10775	0.26306	0.952549	5595	3	0.18285
C14orf159	6	0.58167	0.73236	1	13168	1	0.16803	0.079879	0.20875	0.936355	4525	3	0.16803
C14orf166	6	0.0011727	0.006025	0.11516	1079	4	-1.1909	0.98004	0.9802	1	19553	0	-1.1909
C14orf166B	6	0.3757	0.59328	1	9993	3	-0.092091	0.78779	0.85561	1	16741	1	-0.092091
C14orf169	6	0.21318	0.41049	1	6550	2	0.080699	0.081356	0.21172	0.937757	4578	3	0.080699
C14orf177	6	0.88021	0.89471	1	17482	1	-0.021244	0.22455	0.42529	0.992865	8736	2	-0.021244
C14orf178	6	0.57656	0.72887	1	13071	2	0.3019	0.0080362	0.03265	0.788145	832	3	0.3019
C14orf180	6	0.36813	0.58506	1	9829	3	-0.093216	0.70294	0.81968	1	15974	2	-0.093216
C14orf182	6	0.37099	0.58815	1	9890	2	-0.033603	0.11317	0.27337	0.953687	5802	2	-0.033603
C14orf183	6	0.77697	0.84933	1	16094	1	0.27041	0.062246	0.17316	0.926907	3782	3	0.27041
C14orf2	6	0.51755	0.68975	1	12151	2	-0.068118	0.2663	0.47307	1	9609	2	-0.068118
C14orf28	6	0.55657	0.7154	1	12750	1	0.00038983	0.0053304	0.022934	0.782477	574	2	0.00038983
C14orf37	6	0.1675	0.35662	1	5721	2	0.046234	0.64311	0.77613	1	15187	2	0.046234
C14orf39	6	0.27115	0.47738	1	7672	3	-0.1343	0.00095831	0.0049914	0.695149	141	2	-0.1343
C14orf79	6	0.57999	0.73122	1	13141	1	0.27072	0.11147	0.27012	0.953687	5736	4	0.27072
C14orf80	6	0.0035162	0.016229	0.235256	1415	5	-0.76536	0.99727	0.9973	1	20181	0	-0.76536
C14orf93	6	0.088857	0.2262	1	3991	3	-0.18341	0.58477	0.736	1	14463	2	-0.18341
C15orf26	6	0.82852	0.86908	1	16700	1	-0.091384	0.18653	0.38134	0.982738	7925	2	-0.091384
C15orf27	6	0.94286	0.94296	1	18888	0	0.21047	0.3789	0.59694	1	11857	3	0.21047
C15orf32	6	0.21503	0.41263	1	6584	3	-0.046411	0.20417	0.40193	0.98778	8294	3	-0.046411
C15orf38	6	0.57152	0.72544	1	12983	2	0.040378	0.047488	0.14189	0.91132	3144	3	0.040378
C15orf38-AP3S2	4	0.95137	0.95128	1	19141	0	0.42874	0.029009	0.081881	0.878761	2288	3	0.42874
C15orf39	6	0.90249	0.90885	1	17893	1	-0.0097437	0.58254	0.73447	1	14432	2	-0.0097437
C15orf40	6	0.9977	0.99774	1	20613	0	0.50169	0.0022975	0.011399	0.755869	290	6	0.50169
C15orf41	6	7.32e-07	7.41e-06	0.001879	75	6	-1.608	0.99966	0.99966	1	20438	0	-1.608
C15orf43	6	0.56572	0.72149	1	12894	2	-0.06645	0.65855	0.78707	1	15371	2	-0.06645
C15orf48	6	0.072135	0.19277	1	3590	3	-0.13231	0.21903	0.41892	0.990602	8624	2	-0.13231
C15orf52	6	0.097472	0.24313	1	4209	4	-0.36856	0.65736	0.78619	1	15358	1	-0.36856
C15orf53	6	0.22239	0.42113	1	6715	3	-0.20994	0.0068137	0.028348	0.788145	712	2	-0.20994
C15orf54	6	0.78805	0.85323	1	16236	1	0.14647	0.36205	0.57881	1	11542	2	0.14647
C15orf56	6	0.62429	0.762	1	13873	2	0.040473	0.71248	0.82684	1	16110	2	0.040473
C15orf57	6	0.012505	0.047736	0.490489	1990	2	-0.044233	0.33305	0.54734	1	10957	2	-0.044233
C15orf59	6	0.65139	0.78126	1	14353	1	0.14872	0.36377	0.58066	1	11574	3	0.14872
C15orf60	6	0.7137	0.82767	1	15457	2	-0.029208	0.18389	0.37816	0.980707	7870	2	-0.029208
C15orf61	6	0.78851	0.85341	1	16239	1	0.00025852	0.28234	0.49107	1	9922	2	0.00025852
C15orf62	6	0.62646	0.76346	1	13922	2	-0.17311	0.63569	0.77091	1	15101	2	-0.17311
C15orf65	6	0.6302	0.76608	1	13991	1	0.51617	0.0045395	0.020109	0.780362	518	4	0.51617
C16orf11	6	0.22444	0.42351	1	6755	3	-0.26252	0.67297	0.79756	1	15580	2	-0.26252
C16orf13	6	0.25036	0.45337	1	7253	2	0.17733	0.039252	0.124	0.902802	2772	3	0.17733
C16orf3	6	0.069158	0.18667	1	3537	4	-0.39161	0.14289	0.32786	0.966947	6902	2	-0.39161
C16orf45	6	0.42622	0.63262	1	10881	2	-0.06466	0.1983	0.39512	0.985485	8186	3	-0.06466
C16orf46	6	0.24275	0.44468	1	7098	2	-0.11505	0.39465	0.61378	1	12170	2	-0.11505
C16orf52	6	0.14911	0.33432	1	5437	2	0.020825	0.38245	0.60075	1	11918	2	0.020825
C16orf54	6	0.95795	0.95791	1	19343	0	0.071012	0.55531	0.71644	1	14111	2	0.071012
C16orf55	6	0.28492	0.49289	1	7950	2	-0.023196	0.94552	0.94558	1	18747	0	-0.023196
C16orf58	6	0.094301	0.23691	1	4122	4	-0.23233	0.73587	0.83905	1	16343	1	-0.23233
C16orf59	6	0.12413	0.29354	1	4848	3	-0.23616	0.9912	0.99127	1	19891	0	-0.23616
C16orf62	6	0.57496	0.72779	1	13042	2	0.25879	0.11635	0.27929	0.953687	5934	4	0.25879
C16orf70	6	0.10934	0.26582	1	4479	3	-0.21728	0.27754	0.4857	1	9825	2	-0.21728
C16orf71	6	0.13377	0.31133	1	5095	3	-0.17108	0.049331	0.14583	0.911616	3230	2	-0.17108
C16orf72	6	0.068178	0.1847	1	3514	3	-0.28701	0.30766	0.51929	1	10441	2	-0.28701
C16orf74	6	0.51642	0.68904	1	12141	2	0.028604	0.20152	0.39891	0.987012	8251	2	0.028604
C16orf78	6	0.53094	0.69852	1	12348	1	0.25404	0.014159	0.053312	0.8357	1286	5	0.25404
C16orf80	6	0.001884	0.0094401	0.160964	1206	3	-0.46289	0.94539	0.94545	1	18743	0	-0.46289
C16orf86	6	0.2504	0.45342	1	7257	1	-0.012164	0.39053	0.60943	1	12080	2	-0.012164
C16orf87	6	0.30881	0.5198	1	8467	3	-0.21239	0.28849	0.49794	1	10045	2	-0.21239
C16orf89	6	0.06845	0.18523	1	3519	4	-0.33359	0.28298	0.49175	1	9932	1	-0.33359
C16orf90	6	0.66054	0.78781	1	14513	1	0.65568	0.00022765	0.0012338	0.530285	44	5	0.65568
C16orf92	6	0.56024	0.71777	1	12804	2	-0.078635	0.20739	0.40562	0.98778	8371	2	-0.078635
C16orf93	6	0.60843	0.75081	1	13602	2	0.24717	0.23063	0.43229	0.993426	8867	3	0.24717
C16orf95	6	0.37285	0.59013	1	9934	3	-0.15188	0.32251	0.53579	1	10744	1	-0.15188
C16orf96	6	0.38742	0.60603	1	10268	1	0.19468	0.08816	0.22522	0.940703	4849	4	0.19468
C16orf97	6	0.2723	0.47865	1	7699	3	-0.30942	0.49214	0.67599	1	13341	1	-0.30942
C17orf100	6	0.45583	0.65081	1	11294	2	0.10916	0.25929	0.46511	1	9470	3	0.10916
C17orf102	6	0.30024	0.51015	1	8301	2	0.1358	0.054679	0.15728	0.919011	3459	3	0.1358
C17orf104	6	0.61224	0.75348	1	13656	1	0.2047	0.011597	0.044795	0.82295	1098	3	0.2047
C17orf105	6	0.88258	0.89611	1	17521	1	0.10455	0.6991	0.81682	1	15916	2	0.10455
C17orf107	6	0.65605	0.78453	1	14437	2	0.091888	0.11718	0.28079	0.953687	5977	3	0.091888
C17orf112	6	0.9613	0.96126	1	19457	0	0.16402	0.0070071	0.029031	0.788145	729	3	0.16402
C17orf47	6	0.32174	0.53424	1	8761	2	-0.25298	0.83708	0.87476	1	17196	1	-0.25298
C17orf49	6	0.35504	0.57084	1	9518	3	-0.14872	0.92022	0.9226	1	18235	1	-0.14872
C17orf50	6	0.87212	0.89016	1	17359	1	0.10553	0.38127	0.59945	1	11894	3	0.10553
C17orf51	6	0.34365	0.55836	1	9252	3	-0.17261	0.39671	0.61592	1	12217	1	-0.17261
C17orf53	6	0.080846	0.21018	1	3811	2	-0.027311	0.46163	0.65724	1	12979	2	-0.027311
C17orf58	6	0.18791	0.38086	1	6078	2	0.13499	0.14692	0.33415	0.968054	7026	3	0.13499
C17orf59	6	0.10185	0.25158	1	4302	4	-0.23746	0.99478	0.99482	1	20038	0	-0.23746
C17orf62	6	0.077995	0.2046	1	3732	2	0.18688	0.15838	0.34803	0.971472	7290	3	0.18688
C17orf64	6	0.28621	0.49438	1	7981	2	0.1984	0.16223	0.3526	0.97149	7382	2	0.1984
C17orf66	6	0.66686	0.79247	1	14623	2	0.08084	0.26538	0.47202	1	9594	3	0.08084
C17orf70	6	0.0056177	0.023878	0.307766	1586	3	-0.305	0.90453	0.91111	1	18007	1	-0.305
C17orf72	6	0.9333	0.93356	1	18629	1	0.11907	0.39171	0.61067	1	12113	3	0.11907
C17orf74	6	0.72978	0.83426	1	15662	1	0.61637	0.0016401	0.0082597	0.745179	223	4	0.61637
C17orf75	6	0.13246	0.30895	1	5068	4	-0.22682	0.73558	0.83896	1	16341	1	-0.22682
C17orf77	6	0.4621	0.65465	1	11384	2	0.0097356	0.41922	0.63176	1	12517	2	0.0097356
C17orf78	6	0.81437	0.86319	1	16517	1	-0.037721	0.37459	0.59226	1	11784	1	-0.037721
C17orf80	6	0.39143	0.61034	1	10353	3	-0.17658	0.28478	0.49377	1	9963	2	-0.17658
C17orf82	6	0.4918	0.67324	1	11800	1	0.2244	0.080391	0.20976	0.936766	4542	3	0.2244
C17orf85	6	0.11105	0.26912	1	4516	4	-0.27468	0.98659	0.98667	1	19746	0	-0.27468
C17orf89	6	0.077064	0.20273	1	3710	3	-0.37878	0.54251	0.70814	1	13965	2	-0.37878
C17orf96	6	0.81877	0.86499	1	16580	1	0.50626	0.0046862	0.020648	0.780362	532	4	0.50626
C17orf97	6	0.62917	0.76536	1	13969	2	0.23593	0.038957	0.12334	0.902802	2759	3	0.23593
C17orf98	6	0.94903	0.94908	1	19076	0	0.17619	0.30549	0.51688	1	10397	3	0.17619
C17orf99	6	0.71231	0.82661	1	15436	1	-0.013949	0.24652	0.45038	0.997959	9191	2	-0.013949
C18orf21	6	0.1878	0.38073	1	6074	2	-0.091248	0.8998	0.90796	1	17928	1	-0.091248
C18orf25	6	0.64547	0.77696	1	14254	1	0.38961	0.027576	0.095717	0.882131	2191	4	0.38961
C18orf32	6	0.35577	0.57164	1	9537	2	0.18273	0.025046	0.088004	0.879085	2021	3	0.18273
C18orf42	6	0.94302	0.94312	1	18892	0	0.16949	0.13642	0.31621	0.962766	6675	4	0.16949
C18orf54	6	0.90755	0.91245	1	17995	1	0.12098	0.07811	0.20531	0.93617	4453	3	0.12098
C18orf63	6	0.87605	0.89234	1	17420	1	0.0093075	0.61985	0.76003	1	14901	2	0.0093075
C18orf8	6	0.97851	0.97864	1	19972	0	0.33555	0.13669	0.31673	0.962842	6685	4	0.33555
C19orf10	6	0.67267	0.79679	1	14728	2	0.33412	0.041994	0.13002	0.905155	2898	4	0.33412
C19orf12	6	0.30725	0.51804	1	8437	3	-0.18867	0.98133	0.98152	1	19592	0	-0.18867
C19orf18	6	0.17629	0.36707	1	5865	3	-0.12159	0.69815	0.81611	1	15901	2	-0.12159
C19orf21	6	0.25651	0.46065	1	7363	2	0.0628	0.26653	0.47332	1	9616	3	0.0628
C19orf24	6	0.022057	0.078674	0.672125	2395	4	-0.48878	0.50928	0.68676	1	13544	2	-0.48878
C19orf25	6	0.011399	0.044045	0.467936	1929	4	-0.53136	0.97437	0.97446	1	19384	0	-0.53136
C19orf26	6	0.36201	0.57844	1	9673	2	-0.041166	0.96846	0.96844	1	19244	0	-0.041166
C19orf33	6	0.049631	0.14572	0.959566	3083	3	-0.38824	0.35394	0.57003	1	11373	2	-0.38824
C19orf35	6	0.021311	0.07633	0.658074	2373	5	-0.28715	0.93342	0.93382	1	18493	1	-0.28715
C19orf38	6	0.90942	0.91377	1	18033	1	0.0431	0.94786	0.94793	1	18821	0	0.0431
C19orf40	6	0.016275	0.060139	0.567668	2165	5	-0.40015	0.91674	0.91987	1	18187	1	-0.40015
C19orf43	6	0.013073	0.049649	0.5033	2019	4	-0.22316	0.98279	0.98296	1	19629	0	-0.22316
C19orf44	6	0.32133	0.53379	1	8749	2	0.12497	0.12859	0.30188	0.956978	6407	3	0.12497
C19orf45	6	0.52188	0.69252	1	12215	2	0.16187	0.31303	0.52529	1	10552	3	0.16187
C19orf47	6	0.2753	0.48206	1	7770	3	-0.17272	0.32657	0.54027	1	10832	2	-0.17272
C19orf48	6	0.30736	0.51817	1	8438	3	-0.24811	0.54056	0.70688	1	13940	1	-0.24811
C19orf52	6	0.23863	0.43985	1	7035	3	-0.2594	0.87914	0.89541	1	17634	1	-0.2594
C19orf53	6	0.023596	0.083547	0.695708	2453	3	-0.52557	0.066673	0.1822	0.926907	3980	1	-0.52557
C19orf54	6	0.063804	0.17575	1	3407	4	-0.31803	0.29224	0.50216	1	10119	2	-0.31803
C19orf57	6	0.11466	0.2759	1	4597	3	-0.39301	0.062719	0.17413	0.926907	3797	2	-0.39301
C19orf59	6	0.20714	0.4035	1	6434	3	0.034516	0.16105	0.35119	0.97149	7347	3	0.034516
C19orf60	6	0.26639	0.47195	1	7569	2	0.078934	0.38482	0.6033	1	11973	2	0.078934
C19orf66	6	0.4626	0.65496	1	11391	1	0.26906	0.072159	0.19337	0.933032	4207	4	0.26906
C19orf67	6	0.29634	0.50574	1	8201	3	-0.15944	0.49656	0.67878	1	13398	2	-0.15944
C19orf70	6	0.063506	0.17514	1	3395	4	-0.37893	0.95368	0.95374	1	18943	0	-0.37893
C19orf71	6	0.52939	0.69749	1	12319	2	0.1524	0.56299	0.72144	1	14210	2	0.1524
C19orf73	6	0.030945	0.10448	0.790752	2697	4	-0.53136	0.99089	0.99094	1	19879	0	-0.53136
C19orf77	6	0.099439	0.24703	1	4250	2	0.049033	0.69312	0.81232	1	15833	2	0.049033
C19orf80	6	0.33744	0.5516	1	9112	3	-0.04984	0.64141	0.77494	1	15160	2	-0.04984
C19orf81	6	0.14207	0.3257	1	5327	3	-0.23883	0.96324	0.96322	1	19124	0	-0.23883
C19orf82	6	0.39915	0.61638	1	10505	2	-0.082043	0.88382	0.89809	1	17708	1	-0.082043
C1D	6	0.08696	0.22237	1	3953	2	0.15557	0.2133	0.41242	0.988622	8508	3	0.15557
C1GALT1	6	0.023704	0.083878	0.697231	2458	4	-0.54789	0.11383	0.27457	0.953687	5836	2	-0.54789
C1GALT1C1	6	0.92505	0.92618	1	18411	1	0.057464	0.42296	0.63401	1	12559	2	0.057464
C1orf100	6	0.29454	0.50375	1	8147	3	-0.18242	0.92707	0.92822	1	18375	1	-0.18242
C1orf101	6	0.96259	0.96256	1	19492	0	0.07123	0.62657	0.7646	1	14986	2	0.07123
C1orf105	6	0.70192	0.8187	1	15232	1	0.29715	0.088099	0.22509	0.940703	4845	4	0.29715
C1orf106	6	0.25578	0.45978	1	7349	2	-0.0083966	0.72014	0.83262	1	16223	2	-0.0083966
C1orf109	6	3.92e-06	2.85e-05	0.003636	162	6	-0.951	1	1	1	20634	0	-0.951
C1orf110	6	0.41582	0.62636	1	10735	2	-0.02554	0.83763	0.87498	1	17200	1	-0.02554
C1orf111	6	0.3289	0.5422	1	8927	3	0.043167	0.31014	0.52207	1	10485	3	0.043167
C1orf112	6	0.14378	0.32786	1	5349	3	-0.17608	0.78612	0.85502	1	16721	1	-0.17608
C1orf115	6	0.061126	0.17019	1	3346	4	-0.24824	0.13285	0.3097	0.95995	6552	2	-0.24824
C1orf116	6	0.95714	0.95711	1	19327	0	0.13632	0.36941	0.58671	1	11683	3	0.13632
C1orf122	6	0.26317	0.46828	1	7498	2	0.065624	0.084269	0.21751	0.938956	4690	3	0.065624
C1orf123	6	0.53211	0.6993	1	12368	2	0.23785	0.0084784	0.034179	0.793744	875	3	0.23785
C1orf127	6	0.018401	0.067057	0.608057	2258	4	-0.60742	0.78245	0.85375	1	16690	1	-0.60742
C1orf131	6	0.0083283	0.033553	0.386936	1774	5	-0.55256	0.81291	0.86481	1	16958	1	-0.55256
C1orf141	6	0.25156	0.45478	1	7278	3	-0.25345	0.86736	0.88911	1	17521	1	-0.25345
C1orf146	6	0.8583	0.88296	1	17127	1	0.24221	0.029139	0.1005	0.88579	2295	5	0.24221
C1orf151-NBL1	6	0.51316	0.68689	1	12102	1	0.12171	0.10177	0.25171	0.949767	5370	3	0.12171
C1orf158	6	0.78511	0.85216	1	16197	1	-0.01781	0.049798	0.14684	0.914115	3242	2	-0.01781
C1orf159	6	0.29428	0.50348	1	8139	2	0.13987	0.31513	0.52764	1	10589	3	0.13987
C1orf162	6	0.97993	0.9801	1	20009	0	0.40379	0.010743	0.041948	0.818644	1041	4	0.40379
C1orf168	6	0.52676	0.69572	1	12272	2	0.20742	0.098457	0.24536	0.948582	5235	4	0.20742
C1orf172	6	0.12274	0.29098	1	4806	4	-0.20099	0.50641	0.68495	1	13509	1	-0.20099
C1orf173	6	0.02064	0.074216	0.648764	2339	5	-0.41824	0.72607	0.83625	1	16293	1	-0.41824
C1orf174	6	0.16375	0.35211	1	5666	3	-0.25604	0.9738	0.97388	1	19373	0	-0.25604
C1orf177	6	0.69202	0.81117	1	15045	2	0.20474	0.12439	0.29414	0.955906	6249	3	0.20474
C1orf185	6	0.70083	0.81789	1	15214	1	0.026909	0.91404	0.91786	1	18138	1	0.026909
C1orf186	6	0.9866	0.98668	1	20249	0	0.2729	0.023693	0.08387	0.878761	1923	5	0.2729
C1orf189	6	0.78635	0.8526	1	16214	1	0.034732	0.6697	0.79518	1	15533	2	0.034732
C1orf192	6	0.47887	0.66512	1	11622	2	0.016598	0.29754	0.50797	1	10236	2	0.016598
C1orf194	6	0.9547	0.95475	1	19252	0	0.11609	0.25361	0.45857	0.998441	9353	3	0.11609
C1orf198	6	0.19838	0.39326	1	6271	2	0.01057	0.27526	0.48314	1	9787	2	0.01057
C1orf204	6	0.67426	0.79793	1	14751	2	0.011801	0.16	0.34994	0.97149	7322	2	0.011801
C1orf21	6	0.87552	0.89205	1	17409	1	0.092029	0.13892	0.32074	0.964265	6765	1	0.092029
C1orf210	6	0.86669	0.88727	1	17259	1	0.20505	0.14343	0.32883	0.967079	6925	4	0.20505
C1orf216	6	0.52909	0.6973	1	12311	1	0.33671	0.054178	0.15622	0.919011	3429	4	0.33671
C1orf226	6	0.91865	0.92081	1	18250	1	-0.050691	0.40549	0.62365	1	12359	2	-0.050691
C1orf227	6	0.99846	0.99846	1	20634	0	0.45811	0.0015445	0.0078091	0.738121	213	6	0.45811
C1orf228	6	0.17648	0.36729	1	5868	3	0.053971	0.058669	0.16573	0.926805	3632	3	0.053971
C1orf229	6	0.83077	0.87002	1	16726	1	0.26769	0.10171	0.25158	0.949767	5368	3	0.26769
C1orf233	6	0.23971	0.44113	1	7050	3	-0.16595	0.58703	0.73753	1	14500	1	-0.16595
C1orf234	6	0.98019	0.98035	1	20018	0	0.39177	0.007488	0.030731	0.788145	770	5	0.39177
C1orf27	6	0.074853	0.19826	1	3659	4	-0.32406	0.045216	0.137	0.907529	3044	2	-0.32406
C1orf35	6	0.088151	0.2248	1	3974	2	0.047362	0.84553	0.87852	1	17277	1	0.047362
C1orf43	6	0.11896	0.28394	1	4717	3	-0.36461	0.80157	0.86048	1	16864	1	-0.36461
C1orf50	6	0.26331	0.46845	1	7500	2	0.070249	0.28814	0.49753	1	10040	3	0.070249
C1orf51	6	0.099403	0.24697	1	4248	3	-0.15689	0.39098	0.60989	1	12093	1	-0.15689
C1orf52	6	0.5724	0.72606	1	13000	2	0.2735	0.0075631	0.031003	0.788145	783	3	0.2735
C1orf53	6	0.18363	0.37578	1	5998	3	0.14247	0.039216	0.12391	0.902802	2770	3	0.14247
C1orf54	6	0.96832	0.96829	1	19673	0	0.1311	0.28442	0.49338	1	9954	3	0.1311
C1orf56	6	0.37782	0.59559	1	10044	2	0.19177	0.15381	0.34253	0.970105	7191	3	0.19177
C1orf61	6	0.56899	0.72377	1	12947	1	0.30885	0.024749	0.087143	0.879085	2000	4	0.30885
C1orf63	6	0.35508	0.57089	1	9520	3	-0.17473	0.71618	0.82963	1	16154	1	-0.17473
C1orf64	6	0.16191	0.34986	1	5639	3	-0.25801	0.36403	0.58095	1	11581	2	-0.25801
C1orf65	6	0.20314	0.39889	1	6361	3	-0.19817	0.34988	0.56567	1	11289	3	-0.19817
C1orf68	6	0.47609	0.6634	1	11583	2	-0.027387	0.45665	0.65424	1	12923	1	-0.027387
C1orf74	6	0.13619	0.31576	1	5172	4	-0.20875	0.57017	0.72626	1	14290	1	-0.20875
C1orf85	6	0.31597	0.52785	1	8631	2	0.39729	0.022431	0.079872	0.878761	1836	4	0.39729
C1orf86	6	0.11591	0.27824	1	4638	4	-0.49231	0.99196	0.99204	1	19928	0	-0.49231
C1orf87	6	0.43595	0.63853	1	11012	1	0.32799	0.0052852	0.022776	0.782477	572	3	0.32799
C1orf94	6	0.99282	0.99289	1	20455	0	0.58154	0.011405	0.04416	0.82295	1085	5	0.58154
C1orf95	6	0.52344	0.69353	1	12235	2	-0.020832	0.27095	0.47833	1	9708	3	-0.020832
C1QA	6	0.89191	0.90186	1	17687	1	0.30791	0.089011	0.22689	0.942078	4875	4	0.30791
C1QB	6	0.38737	0.60598	1	10267	3	-0.22279	0.98032	0.98048	1	19566	0	-0.22279
C1QBP	6	0.25595	0.45999	1	7355	3	-0.15266	0.87922	0.89546	1	17635	1	-0.15266
C1QC	6	0.40123	0.61762	1	10533	2	-0.066457	0.90853	0.91387	1	18055	1	-0.066457
C1QL1	5	0.75246	0.80172	1	15856	1	0.32058	0.11641	0.25735	0.952549	5938	3	0.32058
C1QL2	6	0.49368	0.67446	1	11831	2	0.14744	0.22897	0.43043	0.99323	8828	3	0.14744
C1QL3	6	0.5	0.67849	1	11917	1	0.46496	0.0047151	0.020756	0.782477	535	4	0.46496
C1QL4	6	0.047629	0.1414	0.943609	3040	3	-0.16859	0.18097	0.37475	0.977937	7815	3	-0.16859
C1QTNF1	6	0.51967	0.69109	1	12183	1	0.19774	0.14596	0.33301	0.968054	7002	3	0.19774
C1QTNF2	6	0.19374	0.38774	1	6175	2	0.31672	0.095616	0.23988	0.948582	5115	4	0.31672
C1QTNF3	6	0.79696	0.85645	1	16330	1	0.28947	0.066168	0.18119	0.926907	3956	4	0.28947
C1QTNF4	6	0.92257	0.92405	1	18351	1	0.72639	0.0044415	0.019749	0.780362	504	5	0.72639
C1QTNF5	6	0.2756	0.48241	1	7775	3	-0.25547	0.90691	0.91277	1	18033	1	-0.25547
C1QTNF6	6	0.069553	0.18747	1	3544	4	-0.36228	0.083807	0.21658	0.938301	4675	1	-0.36228
C1QTNF7	6	0.032918	0.10894	0.81003	2739	4	-0.3808	0.95801	0.95797	1	19031	0	-0.3808
C1QTNF8	6	0.24421	0.44635	1	7120	3	-0.23789	0.91915	0.92175	1	18216	1	-0.23789
C1QTNF9	6	0.018393	0.06703	0.608057	2257	4	-0.42838	0.30388	0.51509	1	10369	2	-0.42838
C1QTNF9B	3	0.075418	0.15466	0.982625	3673	2	-0.45798	0.78792	0.78805	1	16744	0	-0.45798
C1QTNF9B-AS1	6	0.1146	0.27579	1	4594	4	-0.20436	0.98715	0.98723	1	19765	0	-0.20436
C1R	6	0.33964	0.554	1	9163	3	0.014295	0.13394	0.31171	0.960662	6591	3	0.014295
C1RL	6	0.94326	0.94335	1	18898	0	0.38612	0.0054082	0.02323	0.782477	581	5	0.38612
C1S	6	0.34646	0.56143	1	9323	3	-0.053083	0.71373	0.82777	1	16126	2	-0.053083
C2	6	0.8303	0.86983	1	16722	1	0.28678	0.00032298	0.0017355	0.55363	63	5	0.28678
C20orf111	6	0.67979	0.80203	1	14836	2	0.13496	0.29525	0.50546	1	10189	3	0.13496
C20orf112	6	0.23016	0.43019	1	6857	3	-0.1852	0.92922	0.9301	1	18410	1	-0.1852
C20orf141	6	0.92659	0.9275	1	18455	1	0.12644	0.29301	0.50298	1	10142	2	0.12644
C20orf144	6	0.1455	0.32993	1	5377	3	-0.3082	0.92229	0.92423	1	18285	1	-0.3082
C20orf166	6	0.51428	0.68762	1	12114	2	-0.11891	0.40062	0.62005	1	12302	2	-0.11891
C20orf173	6	0.69519	0.81353	1	15111	1	0.19284	0.11338	0.27373	0.953687	5815	4	0.19284
C20orf194	6	0.98706	0.98714	1	20264	0	0.071674	0.91936	0.92191	1	18219	1	0.071674
C20orf195	6	0.48729	0.67042	1	11739	1	-0.029603	0.077139	0.20338	0.935411	4411	2	-0.029603
C20orf196	6	0.23585	0.43668	1	6975	3	-0.089444	0.28188	0.49055	1	9913	3	-0.089444
C20orf197	6	0.34899	0.56425	1	9384	2	-0.060738	0.31	0.52192	1	10480	1	-0.060738
C20orf201	6	0.28859	0.49705	1	8034	3	-0.087777	0.33397	0.54832	1	10981	3	-0.087777
C20orf202	6	0.39196	0.61089	1	10371	2	0.10657	0.29911	0.50975	1	10270	3	0.10657
C20orf24	6	0.0067381	0.027956	0.343843	1671	5	-0.59012	0.95153	0.95161	1	18899	0	-0.59012
C20orf26	6	0.051525	0.14987	0.973714	3130	4	-0.3253	0.43733	0.6425	1	12724	2	-0.3253
C20orf27	6	0.26406	0.46932	1	7518	2	0.19774	0.047796	0.14254	0.911467	3154	3	0.19774
[truncated: 18,701 more rows]
