# Supplementary material for: Convergent organization of aberrant MYB complex controls oncogenic gene expression in acute myeloid leukemia
Source: eLife. 2021 Feb 2;10:e65905. doi: 10.7554/eLife.65905 (PMC7886351; doi:10.7554/eLife.65905)
Supplement: Figure 5—source data 1. [file elife-65905-fig5-data1.xlsx]

## Sheet: DESeq2_CRYBMIM_1hr-vs-PBS
	baseMean	log2FoldChange	lfcSE	stat	pvalue	padj
DUSP1	2354.68	5.54536	0.0937212	59.1687	0	0
EGR1	3143.93	3.7452	0.0698872	53.5892	0	0
EGR3	2036.22	2.15651	0.0543378	39.6871	0	0
FOS	12944.3	4.68262	0.0585236	80.0125	0	0
FOSB	13445.4	2.71182	0.0696386	38.9413	0	0
IL8	14304.2	5.42161	0.100867	53.7499	0	0
JUN	3747.95	4.32795	0.109138	39.6559	0	0
KLF6	8323.63	2.56171	0.0502233	51.0065	0	0
PMAIP1	4645.45	2.97362	0.0530229	56.0818	0	0
PPP1R15A	15427.4	1.87479	0.0483364	38.7863	0	0
SERPINE1	2932.79	2.63716	0.0648056	40.6934	0	0
SOCS3	2887.39	2.86374	0.0740415	38.6775	0	0
TRIB1	2410.25	2.72978	0.0663591	41.1364	0	0
TSC22D3	6069.15	1.95188	0.0482532	40.4507	0	0
NR4A2	1499.96	2.28659	0.0638167	35.8306	3.68939e-281	3.41293e-278
DUSP6	2289.62	1.4102	0.0451099	31.2614	1.56121e-214	1.35396e-211
PNRC1	1246.25	1.97148	0.0632113	31.1887	1.51735e-213	1.23852e-210
ATF3	2011.12	2.23764	0.0735144	30.4381	1.7206e-203	1.32639e-200
EGR2	675.712	4.92257	0.166106	29.6351	5.28048e-193	3.85641e-190
KLF4	1029.66	2.08795	0.0768477	27.1699	1.47202e-162	1.02129e-159
CLK1	4146.42	1.63109	0.060314	27.0433	4.58116e-161	3.02705e-158
MCL1	24799	1.2283	0.0474505	25.8859	9.60965e-148	6.06107e-145
ID2	1120.62	-1.74347	0.0674158	-25.8614	1.81051e-147	1.09229e-144
CD83	2524.57	1.66925	0.0646281	25.8286	4.23293e-147	2.44734e-144
ATF4	15263.4	0.833229	0.0329967	25.2519	1.08067e-140	5.99815e-138
MIR24-2	971.762	1.63858	0.0668265	24.5199	9.0534e-133	4.83173e-130
KLF10	2091.16	-1.49968	0.0619463	-24.2093	1.77521e-129	9.12328e-127
CSRNP1	2063.6	1.81468	0.0835951	21.7079	1.72714e-104	8.55921e-102
ZFP36	5665.57	1.7286	0.0908634	19.0241	1.07655e-80	5.1511e-78
MYC	9174.67	-1.23491	0.0654734	-18.8613	2.37512e-79	1.09857e-76
SNHG1	5436.65	0.997362	0.0537441	18.5576	7.07967e-77	3.16895e-74
SEPHS2	5688.22	-0.694599	0.037487	-18.5291	1.20361e-76	5.21916e-74
RGS2	1147.04	4.15465	0.226031	18.3809	1.86849e-75	7.85671e-73
IER2	1716.92	0.974229	0.0548998	17.7456	1.86449e-70	7.6093e-68
ZFP36L1	1367.5	1.22999	0.0695357	17.6886	5.12908e-70	2.03346e-67
SNHG8	2165.82	0.906765	0.0514398	17.6277	1.51037e-69	5.82162e-67
RAB11FIP1	6879.74	-0.990416	0.057344	-17.2715	7.71145e-67	2.892e-64
TAGAP	1120.1	0.9646	0.0564213	17.0964	1.57909e-65	5.76615e-63
BTG2	2003.84	0.849372	0.0503626	16.8651	8.12501e-64	2.89084e-61
CCL4	331.832	4.75927	0.282935	16.8211	1.71029e-63	5.933e-61
DBI	5035.86	0.851584	0.0534255	15.9396	3.36285e-57	1.13812e-54
HPS6	816.894	-1.52456	0.0966373	-15.7761	4.54487e-56	1.46662e-53
HCAR2	454.156	3.79402	0.246279	15.4054	1.50632e-53	4.75038e-51
CITED2	4363.16	1.01251	0.0662968	15.2723	1.16939e-52	3.60589e-50
GADD45B	1659.94	1.46074	0.0961998	15.1844	4.48312e-52	1.35234e-49
TNFSF9	1446.38	1.10275	0.0726324	15.1827	4.60649e-52	1.35999e-49
SGK1	1864.75	3.19977	0.213672	14.9752	1.06654e-50	3.08318e-48
SLC38A2	11513.4	0.893831	0.0602144	14.8442	7.59051e-50	2.14951e-47
ZBTB9	496.096	-1.37073	0.0931188	-14.7202	4.77991e-49	1.32652e-46
CISH	1477.72	-0.994816	0.0679999	-14.6297	1.81682e-48	4.94318e-46
ARL4C	682.868	-0.96686	0.0684355	-14.128	2.55138e-45	6.80825e-43
SNHG5	2705.42	0.708172	0.050981	13.8909	7.19396e-44	1.88346e-41
C3AR1	517.156	1.34944	0.0977997	13.798	2.61896e-43	6.72975e-41
NCOA5	1819.35	-0.757476	0.0549946	-13.7736	3.67262e-43	9.26567e-41
CHAMP1	1798.8	-1.00772	0.0734661	-13.7168	8.04965e-43	1.99459e-40
AC013394.2	1447.3	0.838262	0.062193	13.4784	2.09641e-41	5.10347e-39
EMP1	3343.22	1.36126	0.101381	13.4272	4.19127e-41	1.00273e-38
THBD	2554.33	-0.865459	0.064659	-13.385	7.40127e-41	1.74068e-38
DNAAF2	992.265	1.23623	0.0948118	13.0388	7.36491e-39	1.64831e-36
CCL3	175.626	2.01903	0.15693	12.8659	7.00622e-38	1.54315e-35
TREM1	548.234	1.17639	0.0916821	12.8312	1.09595e-37	2.37616e-35
JRK	1453.35	-0.747856	0.0609748	-12.265	1.39601e-34	2.93501e-32
SLC30A1	1974.56	-0.742514	0.0606716	-12.2383	1.9416e-34	3.962e-32
KLF2	615.306	1.62346	0.133858	12.1282	7.48938e-34	1.50613e-31
DIDO1	3027.98	-0.661839	0.0547091	-12.0974	1.0898e-33	2.1603e-31
EIF4A2	8646.2	0.71482	0.059372	12.0397	2.19787e-33	4.29544e-31
RGCC	977.589	1.56114	0.1323	11.8	3.90467e-32	7.42208e-30
GAS5	8737.4	0.665256	0.0567343	11.7258	9.39799e-32	1.76225e-29
RPUSD2	383.233	-1.19288	0.101803	-11.7176	1.03605e-31	1.91682e-29
LINC00599	1632.64	-0.702566	0.0600412	-11.7014	1.2539e-31	2.28936e-29
GEMIN4	2832.06	-0.621957	0.0543537	-11.4428	2.55564e-30	4.60546e-28
ADNP2	2019.69	-0.585258	0.0523966	-11.1698	5.73286e-29	1.01986e-26
ELMSAN1	2665.29	-0.665498	0.0596071	-11.1647	6.06661e-29	1.06557e-26
FAM217B	1091.98	-0.754823	0.067673	-11.154	6.84727e-29	1.18766e-26
OSR2	369.557	1.37521	0.125126	10.9906	4.24283e-28	7.26834e-26
SMCR8	920.646	-0.719263	0.0679329	-10.5878	3.39331e-26	5.41214e-24
SNHG3	2431.86	0.628128	0.0594353	10.5683	4.18147e-26	6.44689e-24
DDIT3	345.647	1.05092	0.0996389	10.5473	5.2286e-26	7.97276e-24
ASPM	3786.55	-0.636248	0.0608131	-10.4623	1.28627e-25	1.94003e-23
IER5	3385.27	0.72646	0.0694654	10.4579	1.34857e-25	2.01212e-23
DUSP7	3244.83	-0.69097	0.0662342	-10.4322	1.76684e-25	2.60816e-23
DICER1	2154.25	-0.760425	0.0738562	-10.296	7.34292e-25	1.06136e-22
RIPK1	981.682	-0.698294	0.0678913	-10.2855	8.19418e-25	1.17219e-22
CCDC173	49.3932	2.47886	0.243233	10.1913	2.16902e-24	3.04014e-22
PTGS2	1314.82	3.12966	0.309868	10.1	5.5249e-24	7.59044e-22
GCNT1	1061.56	-0.705457	0.0701609	-10.0549	8.74537e-24	1.17816e-21
PHLDA1	2097.11	0.623274	0.0622327	10.0152	1.30671e-23	1.72685e-21
BHLHE40	1286.83	-0.652471	0.0653438	-9.98519	1.76959e-23	2.29485e-21
EHMT1	1703.47	-0.76468	0.0770372	-9.92611	3.20522e-23	4.08034e-21
THAP9-AS1	1069.91	0.835416	0.0844833	9.88853	4.6684e-23	5.83592e-21
FBXO5	1242.34	-0.618836	0.0629407	-9.83205	8.19303e-23	9.9725e-21
GZF1	562.976	-0.719978	0.0733098	-9.82104	9.13996e-23	1.09333e-20
ZNF526	690.904	-0.858952	0.0878577	-9.77662	1.41869e-22	1.68254e-20
INTS5	1004.46	-0.84131	0.0861473	-9.76595	1.57627e-22	1.85359e-20
R3HCC1L	650.009	0.850771	0.087172	9.75968	1.67681e-22	1.95525e-20
GTF3C4	1703.81	-0.641447	0.065808	-9.74725	1.89524e-22	2.19153e-20
C15orf39	3586.84	-1.45215	0.149251	-9.72962	2.25429e-22	2.56398e-20
SMG9	2288.44	0.630522	0.0648861	9.71735	2.54302e-22	2.86886e-20
CMTR2	1091.78	-0.710474	0.073311	-9.69124	3.28522e-22	3.64686e-20
PRDM1	140.323	-1.99242	0.20656	-9.6457	5.1262e-22	5.60088e-20
HCAR3	258.579	4.42724	0.459389	9.63724	5.56634e-22	6.03426e-20
DLX2	341.321	1.29665	0.13456	9.63623	5.62151e-22	6.04683e-20
PHF13	530.272	-0.809414	0.0843848	-9.59194	8.64434e-22	9.15641e-20
SKIL	1154.64	-0.788543	0.0825117	-9.55673	1.21535e-21	1.26799e-19
ZNF281	845.664	-0.731035	0.0766098	-9.54232	1.39668e-21	1.44629e-19
DDX28	674.607	-0.720501	0.0772462	-9.32733	1.08572e-20	1.10775e-18
GPR132	1482.54	-0.930757	0.100195	-9.28943	1.55119e-20	1.54851e-18
PELO	346.655	-1.00292	0.108149	-9.27348	1.80173e-20	1.78577e-18
LCMT2	648.466	-0.721413	0.0781372	-9.23264	2.64046e-20	2.58021e-18
HYLS1	579.483	-0.814105	0.0888333	-9.16441	4.98171e-20	4.80043e-18
MICA	148.426	1.29135	0.141495	9.12649	7.07537e-20	6.77088e-18
KCNE3	332.843	0.882491	0.0967926	9.11734	7.69926e-20	7.31746e-18
VPS18	1166.21	-0.832817	0.0915319	-9.09866	9.14543e-20	8.63279e-18
FAM46B	51.4662	-2.20348	0.242933	-9.07034	1.18647e-19	1.10493e-17
BTG1	1884.82	0.646697	0.0716127	9.03048	1.70916e-19	1.58108e-17
PLK2	388.626	1.31032	0.146357	8.95288	3.4632e-19	3.18247e-17
CBX6	5682.49	-0.61632	0.0689473	-8.93901	3.92688e-19	3.58483e-17
CDKN2C	1461.92	-0.655834	0.073481	-8.92521	4.44842e-19	4.01957e-17
TMEM206	979.602	0.646746	0.0724653	8.9249	4.46104e-19	4.01957e-17
SGK223	1099.69	-1.02917	0.115365	-8.92094	4.62333e-19	4.13893e-17
CCDC71	429.386	-0.906819	0.101691	-8.91742	4.77282e-19	4.24536e-17
TMPO-AS1	310.934	-0.850626	0.0960205	-8.85879	8.08868e-19	7.1037e-17
ZSWIM1	390.222	-0.807695	0.0920142	-8.77793	1.66507e-18	1.41745e-16
DNAJB9	986.529	0.663922	0.0759616	8.74023	2.32636e-18	1.94462e-16
NANP	361.089	-0.977667	0.112486	-8.69143	3.57912e-18	2.9214e-16
SMG8	707.293	-0.630094	0.0725159	-8.68904	3.65505e-18	2.96594e-16
RPL22L1	1487.64	0.604601	0.0698116	8.66046	4.69856e-18	3.79054e-16
PCGF1	562.72	0.664967	0.0775291	8.577	9.738e-18	7.7214e-16
DNAJC14	561.284	-0.697683	0.0815574	-8.5545	1.18383e-17	9.3334e-16
GOLGA8R	501.199	-0.833612	0.0980915	-8.49831	1.92373e-17	1.50812e-15
NT5C3A	1154.28	0.592782	0.0699423	8.4753	2.34483e-17	1.8177e-15
KIAA1586	782.051	-0.609989	0.0720956	-8.46083	2.65484e-17	2.02081e-15
CLK4	668.811	0.72224	0.0853825	8.45888	2.69957e-17	2.03583e-15
PDP1	627.768	-0.656813	0.0784948	-8.3676	5.8806e-17	4.3636e-15
ZC3H8	651.105	0.647492	0.077517	8.3529	6.66096e-17	4.91635e-15
KIAA1279	474.497	-0.694915	0.0832749	-8.34483	7.13149e-17	5.18097e-15
SRSF8	673.956	-0.608256	0.0731861	-8.31109	9.48284e-17	6.85333e-15
OTUD1	833.626	1.04201	0.126207	8.25636	1.50178e-16	1.07416e-14
CTC-444N24.11	523.847	0.697901	0.0849519	8.21525	2.11715e-16	1.49885e-14
TXNL4B	616.256	0.664431	0.0808918	8.21382	2.14261e-16	1.50918e-14
MAFF	1062.88	0.737579	0.0899072	8.20378	2.32949e-16	1.63252e-14
CCNG2	487.751	0.732133	0.0894678	8.1832	2.76397e-16	1.92728e-14
MOCS3	311.463	-0.919156	0.11283	-8.14635	3.75066e-16	2.58926e-14
TAOK2	1244.82	-0.814882	0.100717	-8.0908	5.92724e-16	4.0716e-14
SMAD7	361.654	-0.85722	0.106132	-8.0769	6.64356e-16	4.50936e-14
NR4A1	928.368	1.05313	0.130761	8.05388	8.02091e-16	5.35087e-14
APOL4	571.02	-0.692943	0.0877284	-7.89874	2.8174e-15	1.81834e-13
APOLD1	444.537	0.63336	0.0808056	7.83807	4.57524e-15	2.84691e-13
TNKS1BP1	1093.94	-0.784994	0.100545	-7.8074	5.83788e-15	3.58436e-13
ZNF416	174.231	-1.07583	0.138009	-7.79536	6.42243e-15	3.90867e-13
FIGNL1	699.516	-0.649719	0.0834492	-7.7858	6.92726e-15	4.17924e-13
PDP2	566.22	-0.757152	0.0975813	-7.7592	8.54687e-15	5.13404e-13
RELL1	95.9849	-1.3225	0.170655	-7.74956	9.22142e-15	5.46923e-13
ZNF180	487.725	-0.679572	0.087692	-7.74953	9.22311e-15	5.46923e-13
PARS2	147.265	-1.15252	0.149505	-7.70891	1.26897e-14	7.42961e-13
DOLK	293.19	-0.996346	0.129294	-7.70605	1.29772e-14	7.56601e-13
MASP2	49.1165	-1.84282	0.240886	-7.6502	2.00664e-14	1.1408e-12
RANBP6	1008.18	-0.621592	0.0812685	-7.64863	2.03137e-14	1.14582e-12
SLC45A4	1249.35	-0.769493	0.100634	-7.64648	2.06563e-14	1.16043e-12
PLEKHG2	912.262	-0.621637	0.0813252	-7.64385	2.10828e-14	1.17962e-12
SH3BP5L	894.301	-0.721102	0.0951909	-7.57532	3.58232e-14	1.96763e-12
ARL11	422.915	0.616432	0.081753	7.54018	4.69336e-14	2.52423e-12
MIR142	485.882	-1.19067	0.158331	-7.52014	5.47193e-14	2.9316e-12
MED18	581.752	-0.606626	0.0808461	-7.50346	6.2153e-14	3.30435e-12
BCL2L2	652.035	0.595906	0.0794897	7.49665	6.54673e-14	3.46727e-12
MAP10	345.012	-0.702959	0.0941809	-7.46393	8.39803e-14	4.30004e-12
OARD1	850.448	0.597114	0.0801823	7.44695	9.55216e-14	4.85516e-12
ADRB2	352.591	-0.761111	0.102262	-7.44275	9.86085e-14	4.99377e-12
ZNF469	448.124	-1.18073	0.159277	-7.41308	1.23395e-13	6.18133e-12
SYS1	554.904	0.592605	0.0801183	7.39663	1.39688e-13	6.94733e-12
ZNF253	609.739	-0.628387	0.0850034	-7.39249	1.44104e-13	7.14137e-12
ZNF581	563.805	0.632585	0.0856084	7.38929	1.47614e-13	7.2893e-12
CAMKV	167.815	-1.33304	0.18128	-7.35347	1.9312e-13	9.43568e-12
TTC30B	204.966	-0.797251	0.108757	-7.33055	2.29216e-13	1.10437e-11
RP11-386I14.4	107.322	2.39342	0.326815	7.32348	2.4162e-13	1.16011e-11
CTGF	139.857	1.14423	0.156935	7.29111	3.07408e-13	1.45088e-11
PLK3	996.367	0.760574	0.104384	7.28632	3.18534e-13	1.48821e-11
NFKBIZ	202.13	1.26536	0.174394	7.25575	3.9945e-13	1.83536e-11
WDR89	634.482	-0.614837	0.0850109	-7.23244	4.74377e-13	2.13716e-11
ZBTB39	554.778	-0.60376	0.0834975	-7.23088	4.79879e-13	2.148e-11
LINC00925	400.864	-0.633363	0.0877318	-7.21931	5.2251e-13	2.30903e-11
FBXO30	1012.25	-0.590872	0.0825724	-7.1558	8.31866e-13	3.58478e-11
RMRP	473.738	1.40611	0.200022	7.02975	2.06904e-12	8.41936e-11
MIR22HG	120.05	-1.40224	0.199687	-7.02216	2.18469e-12	8.86398e-11
NACC2	672.077	-0.687963	0.0981264	-7.01098	2.36648e-12	9.51806e-11
KCNK5	539.413	0.638034	0.0911155	7.00248	2.51476e-12	1.00852e-10
IFFO2	399.943	-0.688419	0.0989917	-6.95431	3.54284e-12	1.40058e-10
NFKBIE	468.45	-0.784917	0.113128	-6.93831	3.96829e-12	1.54241e-10
KMT2E-AS1	219.237	1.4054	0.204946	6.85741	7.01222e-12	2.62977e-10
TMEM242	432.229	0.590671	0.0865298	6.82622	8.71825e-12	3.23461e-10
AC084018.1	239.617	-0.768924	0.113202	-6.79247	1.10233e-11	4.04653e-10
LINS	463.968	0.760797	0.112127	6.78513	1.15981e-11	4.23512e-10
RGS1	108.317	2.2118	0.326574	6.77272	1.26385e-11	4.55524e-10
ZC3H4	1953.54	-0.635837	0.0940486	-6.76073	1.37302e-11	4.92301e-10
FICD	162.879	-0.849894	0.126791	-6.70311	2.04036e-11	7.11357e-10
SOCS1	80.773	-2.02275	0.301786	-6.70259	2.0476e-11	7.12092e-10
ZNF57	162.778	-0.997502	0.150702	-6.61902	3.61578e-11	1.21549e-09
NRROS	3025.22	-0.650524	0.0985556	-6.60058	4.09566e-11	1.36614e-09
NOTCH2NL	189.219	-0.842488	0.128163	-6.57357	4.91244e-11	1.61528e-09
RP11-61L19.2	19.6117	3.88769	0.592764	6.55859	5.43204e-11	1.77771e-09
MKLN1-AS1	162.705	1.21422	0.185214	6.55577	5.5357e-11	1.80669e-09
RBM4	239.164	0.784194	0.120029	6.53335	6.43156e-11	2.07063e-09
ZNF460	156.709	0.962975	0.147617	6.52347	6.87014e-11	2.18647e-09
CXorf40A	273.254	-0.736005	0.113484	-6.48552	8.84282e-11	2.78238e-09
ZBTB3	162.823	-0.929273	0.146563	-6.34043	2.29119e-10	6.75001e-09
RHOB	824.248	0.703361	0.112068	6.27619	3.46979e-10	1.00097e-08
C19orf47	549.767	-0.772351	0.123654	-6.24608	4.20874e-10	1.20166e-08
BZRAP1	277.433	-0.722688	0.115839	-6.23873	4.41127e-10	1.2492e-08
ZNF543	180.283	-0.869615	0.139431	-6.23687	4.464e-10	1.26156e-08
HIST2H2BE	236.317	0.941256	0.151328	6.21996	4.9729e-10	1.39402e-08
TUBD1	233.646	0.709463	0.114569	6.19244	5.92401e-10	1.63098e-08
ZNF778	175.166	-0.897792	0.145246	-6.1812	6.36162e-10	1.748e-08
CTB-89H12.4	660.275	0.628872	0.101856	6.17412	6.65316e-10	1.82027e-08
PDGFA	411.547	-0.629825	0.102421	-6.14937	7.77905e-10	2.09767e-08
ZNF767	241.87	0.676402	0.110694	6.11058	9.92718e-10	2.60889e-08
2020-03-01	173.255	-0.896895	0.149963	-5.98077	2.22086e-09	5.58274e-08
STC2	86.2665	0.943711	0.158033	5.9716	2.34939e-09	5.8845e-08
RRN3P2	151.593	0.84728	0.142969	5.92632	3.09801e-09	7.62199e-08
LINC00936	179.921	1.12664	0.19028	5.92094	3.20101e-09	7.84755e-08
IQSEC2	201.693	-0.763768	0.129662	-5.89043	3.85192e-09	9.31172e-08
FLRT1	156.649	-1.05801	0.179864	-5.88226	4.0471e-09	9.74958e-08
KRTCAP2	201.01	-0.77342	0.131681	-5.87345	4.2681e-09	1.02464e-07
HES1	36.714	-2.01345	0.343531	-5.86104	4.59987e-09	1.09859e-07
NAT1	460.582	-0.609083	0.104389	-5.83474	5.38752e-09	1.26279e-07
INHBE	85.463	0.953005	0.164225	5.80304	6.51235e-09	1.49611e-07
PANK1	272.533	0.642673	0.111029	5.78833	7.10899e-09	1.61712e-07
RRS1	1357.31	-0.692211	0.119771	-5.77944	7.49516e-09	1.68836e-07
DNAJB5	104.156	-0.962759	0.167862	-5.73542	9.72715e-09	2.15613e-07
NFIC	1749.19	-0.598824	0.104487	-5.73107	9.97989e-09	2.20863e-07
BLOC1S4	333.51	-0.629342	0.110638	-5.68832	1.28296e-08	2.79472e-07
ADM5	67.8271	-1.37796	0.243289	-5.66386	1.48004e-08	3.18403e-07
ZNF408	469.243	-0.795376	0.142234	-5.59203	2.24436e-08	4.66209e-07
CTDP1	1104.84	-0.739621	0.132604	-5.57765	2.4379e-08	5.05654e-07
JUND	8678.24	0.615655	0.110419	5.57563	2.46642e-08	5.10806e-07
IRX5	231.648	-0.692643	0.124443	-5.56594	2.60749e-08	5.37615e-07
CTB-31O20.4	78.3851	-1.20967	0.217581	-5.55963	2.70354e-08	5.54945e-07
FDXACB1	93.9039	-1.04035	0.187946	-5.53535	3.10605e-08	6.2772e-07
IRF2BPL	272.629	-0.772889	0.13963	-5.53525	3.10784e-08	6.2772e-07
SOWAHD	137.189	-0.928074	0.16842	-5.51048	3.57858e-08	7.1141e-07
B3GNT7	4206.04	-0.620088	0.113391	-5.4686	4.53616e-08	8.79102e-07
TIGD6	151.559	-0.805804	0.147432	-5.4656	4.61339e-08	8.92823e-07
HCFC1	4746.9	-0.588896	0.10785	-5.46034	4.75213e-08	9.15841e-07
TMEM102	306.898	-0.760574	0.140861	-5.39945	6.6844e-08	1.25511e-06
RP11-489E7.4	43.8858	5.60845	1.06102	5.2859	1.25088e-07	2.26891e-06
TLR1	195.324	-0.676012	0.128924	-5.24351	1.57551e-07	2.81362e-06
SNORD14E	43.3479	2.44417	0.468569	5.21625	1.8258e-07	3.22325e-06
FAM212A	33.7324	-1.65743	0.320592	-5.16992	2.34191e-07	4.0119e-06
CENPBD1	171.523	-0.805196	0.158705	-5.07356	3.9045e-07	6.39656e-06
CEBPD	711.896	0.691335	0.137106	5.04234	4.59874e-07	7.4634e-06
CHAC1	228.434	0.756793	0.150695	5.02201	5.11344e-07	8.21228e-06
FANCF	212.028	-0.59446	0.119937	-4.95644	7.17964e-07	1.11312e-05
ZNHIT2	123.15	-1.21992	0.249299	-4.89338	9.9117e-07	1.47728e-05
C12orf76	182.471	0.631488	0.129681	4.86957	1.11843e-06	1.64052e-05
TAF1A	130.784	0.756362	0.155775	4.85549	1.20091e-06	1.7509e-05
CFL2	198.984	-0.612456	0.126471	-4.84265	1.28118e-06	1.85377e-05
GOLGA8K	76.6245	-0.995802	0.205681	-4.84148	1.28877e-06	1.86281e-05
KLHL11	121.722	-0.803255	0.167487	-4.79592	1.61926e-06	2.28575e-05
NR4A3	94.0572	1.42417	0.300269	4.74297	2.10605e-06	2.90493e-05
ARFGAP1	1559.94	-0.591784	0.125061	-4.73197	2.22352e-06	3.04576e-05
KRBOX4	195.859	0.613404	0.131497	4.66476	3.08978e-06	4.09101e-05
ZXDB	189.63	-0.617671	0.132895	-4.64781	3.3548e-06	4.40409e-05
ZNF597	148.872	-0.682202	0.148102	-4.60631	4.09881e-06	5.30056e-05
STOX2	135.271	-0.664082	0.145141	-4.57542	4.75263e-06	6.03915e-05
RP6-99M1.3	31.786	3.03477	0.668587	4.53908	5.64992e-06	7.0502e-05
RP4-758J18.13	94.7951	-0.813421	0.180473	-4.50716	6.57001e-06	8.05349e-05
RP11-158K1.3	102.213	-0.736586	0.165422	-4.45278	8.47674e-06	0.000102104
RP3-402G11.28	19.7594	-1.91717	0.430948	-4.44873	8.63798e-06	0.000103865
AP001053.11	53.2101	-1.14611	0.257798	-4.44577	8.75781e-06	0.000105124
TNFRSF12A	245.252	-0.787207	0.177104	-4.44489	8.79371e-06	0.000105373
CXCR3	165.417	-1.08189	0.243554	-4.44211	8.9081e-06	0.000106651
GOLGA8O	130.066	-0.711424	0.161416	-4.40738	1.04626e-05	0.000122102
HARBI1	152.462	-0.678795	0.154174	-4.40279	1.06867e-05	0.000124507
ZNF296	333.663	-1.25263	0.284502	-4.40289	1.06817e-05	0.000124507
ZNF547	90.1903	-0.785131	0.178999	-4.38624	1.15328e-05	0.00013358
RP11-665G4.1	81.5004	1.76331	0.402712	4.3786	1.19446e-05	0.000137775
EME2	556.152	-0.61811	0.141347	-4.373	1.2255e-05	0.000141003
ZBTB45	425.626	-0.67611	0.155919	-4.3363	1.44903e-05	0.000162414
RP11-448G15.3	31.1504	-1.34981	0.313186	-4.30991	1.6332e-05	0.000180002
CTB-31O20.8	19.7968	-1.95127	0.452788	-4.30946	1.63653e-05	0.000180226
C1orf74	76.4377	-0.977134	0.227291	-4.29904	1.71538e-05	0.000187422
ASPHD2	100.616	-0.668967	0.155974	-4.28895	1.79519e-05	0.000194915
RP11-498C9.12	36.978	-1.64277	0.38377	-4.28061	1.86382e-05	0.000201577
SNORD78	28.7808	1.49787	0.353724	4.23459	2.28974e-05	0.000242537
MRPL45P2	92.7094	0.735054	0.174974	4.20093	2.65819e-05	0.00027754
TRIM46	293.716	-0.587261	0.139819	-4.20014	2.66745e-05	0.000278298
THBS1	352.555	-0.740627	0.178886	-4.14022	3.46971e-05	0.000349388
ADAM8	162.531	-0.788126	0.193213	-4.07904	4.52213e-05	0.000441273
CRTC1	582.041	-0.624778	0.153271	-4.07629	4.57601e-05	0.000446217
RP11-12A2.1	21.2529	1.44112	0.355015	4.05932	4.92156e-05	0.000476231
C17orf51	168.726	-0.603353	0.148725	-4.05684	4.97401e-05	0.000480302
FAM46C	185.972	-0.600859	0.148504	-4.04608	5.20832e-05	0.000498418
ZNF670	150.907	-0.596379	0.147649	-4.03916	5.36426e-05	0.000510175
ZNF503	152.199	-0.738718	0.182931	-4.03823	5.38569e-05	0.000511512
RP11-258C19.7	97.4137	0.681497	0.168851	4.03609	5.43487e-05	0.000515477
ACTL10	38.5076	-1.27669	0.316671	-4.03159	5.54005e-05	0.00052402
RP11-61A14.2	114.729	-0.710434	0.176847	-4.01722	5.88899e-05	0.000554029
TIGD5	245.366	-0.783379	0.195544	-4.00615	6.17172e-05	0.000577081
RNU4ATAC	18.8994	4.91021	1.24021	3.95918	7.52071e-05	0.000690194
AC005682.5	90.4868	0.75357	0.190997	3.94545	7.96496e-05	0.000725685
PSMD6-AS2	24.421	-1.36474	0.347885	-3.92296	8.74664e-05	0.000784761
METTL12	87.7468	0.675992	0.173265	3.90149	9.5601e-05	0.000844942
RP11-288H12.3	44.1094	1.13074	0.290545	3.89179	9.95084e-05	0.00087391
RP11-54O7.1	95.0427	-0.794419	0.204184	-3.89071	9.99517e-05	0.000876694
ZNF596	97.8001	-0.724503	0.187485	-3.86431	0.000111403	0.000965535
CCDC39	116.282	-0.600914	0.155717	-3.859	0.000113852	0.000984568
PHRF1	1872.6	-0.750858	0.195147	-3.84765	0.000119257	0.0010249
CHERP	1629.7	-0.732818	0.19076	-3.84156	0.000122252	0.00104521
AC069278.4	30.7336	-1.12855	0.293938	-3.83943	0.000123322	0.00105241
RP11-469M7.1	78.5174	0.689101	0.179505	3.83889	0.000123594	0.00105408
HIST1H2BE	15.3465	2.17623	0.567677	3.83357	0.000126295	0.00107447
RAB39A	99.9573	-0.822396	0.214811	-3.82846	0.000128949	0.00109104
MAPK8IP3	1533.29	-0.814006	0.212951	-3.82251	0.000132101	0.00111317
TIAM2	64.6738	0.861184	0.225805	3.81384	0.000136826	0.00114719
C21orf2	167.439	-0.664427	0.175405	-3.78795	0.000151893	0.00125756
HYAL2	155.962	-0.596607	0.158002	-3.77594	0.000159403	0.00131191
SIX1	29.2838	-1.11203	0.295093	-3.76842	0.000164285	0.00134253
ZNF329	59.2976	-0.828309	0.220369	-3.75873	0.000170775	0.00138903
ALKBH4	181.411	-0.598886	0.159763	-3.74858	0.000177837	0.00144308
AC009133.14	33.1715	-1.17044	0.312605	-3.74416	0.000180998	0.0014653
CITED4	516.172	-0.593697	0.158824	-3.73809	0.000185427	0.00149679
AC108488.4	62.4745	0.720551	0.192922	3.73494	0.000187763	0.00151213
CTB-118N6.3	15.7611	1.55147	0.417637	3.71487	0.000203305	0.00162317
RP11-245G13.2	115.546	0.615797	0.165849	3.71299	0.000204827	0.0016325
RASGEF1B	104.696	0.822168	0.221444	3.71276	0.000205008	0.001633
RP11-199F11.2	63.8854	0.772407	0.208191	3.7101	0.000207179	0.00164557
RPL29P14	46.0793	3.33861	0.904354	3.69171	0.000222756	0.00174828
CTD-2162K18.5	60.0827	0.772597	0.209364	3.69021	0.00022407	0.0017576
HOXA-AS4	75.0163	-0.788573	0.215218	-3.66407	0.000248236	0.00191789
GPM6B	31.1148	-1.116	0.306366	-3.64269	0.000269805	0.00205177
PRDM8	75.6224	-0.695416	0.190911	-3.64262	0.000269882	0.00205177
TSSK4	83.5364	-0.665649	0.183244	-3.63259	0.000280595	0.00212066
RP11-1212A22.1	45.3204	-1.44973	0.399921	-3.62504	0.00028892	0.00217647
SNORA73B	58.4824	0.839928	0.233358	3.59931	0.000319066	0.00237647
GAS2L1	77.6284	-0.920419	0.256037	-3.59486	0.000324561	0.00240963
HDAC10	73.3395	-0.754065	0.210537	-3.58163	0.000341452	0.00251619
ABHD17A	1507.77	-0.856927	0.239611	-3.57632	0.000348467	0.00255838
TUBB1	35.3379	-1.00538	0.281362	-3.57326	0.000352561	0.00258433
RP5-997D16.2	30.1584	-1.20243	0.337261	-3.56527	0.000363475	0.00264894
NHSL2	84.5507	-0.66784	0.187749	-3.55709	0.00037499	0.0027257
RP3-402G11.25	41.7413	-0.943063	0.265553	-3.55132	0.0003833	0.00277738
OGFR	1211.06	-0.72192	0.203823	-3.54189	0.000397271	0.00286217
KIF26A	154.049	-0.822101	0.232564	-3.53494	0.000407864	0.00292633
RP11-259N19.1	63.6605	-0.84719	0.240172	-3.52743	0.000419611	0.00299821
PLEKHA3P1	27.7109	-1.07546	0.306277	-3.51139	0.000445776	0.00314949
STAMBPL1	40.8659	0.879575	0.250688	3.50864	0.000450402	0.00317339
GPR65	96.4688	-0.642357	0.184572	-3.48025	0.000500943	0.00345825
SNORD19	37.9878	1.15823	0.336727	3.43966	0.000582437	0.00393279
ELMO3	92.1784	-0.726293	0.211778	-3.4295	0.000604699	0.00405941
RP5-1074L1.4	84.6271	0.656959	0.191847	3.42439	0.000616183	0.00412056
MAP1S	942.919	-0.895787	0.261785	-3.42184	0.000621992	0.0041534
RP11-1055B8.4	27.2237	-1.1825	0.346575	-3.41195	0.000644988	0.00428633
CTC-205M6.5	55.568	-0.77565	0.227471	-3.40989	0.000649895	0.00431687
SGPP2	40.3912	-0.919666	0.27012	-3.40465	0.000662486	0.00438372
CTD-2228K2.7	1302.15	-0.628964	0.185468	-3.39123	0.000695798	0.00458012
CHMP4BP1	33.9434	1.75462	0.517903	3.38794	0.000704196	0.00462443
SLC34A3	22.1399	-1.36242	0.404618	-3.36718	0.000759412	0.00491722
RIMBP3	17.9712	-1.44047	0.429695	-3.35231	0.000801408	0.00513642
KCNAB3	94.258	-0.600099	0.179021	-3.35211	0.000801985	0.00513774
CNTF	51.9431	-0.85506	0.255821	-3.34241	0.000830535	0.0052792
MTSS1	98.5967	-0.649788	0.196717	-3.30316	0.000956022	0.00594764
SLC9A3	162.904	-0.723725	0.219176	-3.30203	0.000959895	0.00596484
TTC30A	56.1658	-0.704253	0.214123	-3.28902	0.00100538	0.00618834
RP11-28F1.2	31.714	0.992276	0.302195	3.28356	0.00102505	0.00629363
CTB-92J24.2	39.8595	0.779364	0.2377	3.27877	0.00104261	0.00638165
ADCY7	2280.83	-0.609072	0.186082	-3.27314	0.00106359	0.00650146
PRR22	88.6304	-0.818728	0.250309	-3.27087	0.00107218	0.00654244
ARMC5	718.917	-0.696533	0.214075	-3.25369	0.00113916	0.00690263
SNORD3A	98.2001	1.10532	0.340884	3.24251	0.00118481	0.00711704
RP11-467H10.1	15.8443	1.5533	0.479908	3.23666	0.00120939	0.00722405
RP11-231K24.2	66.9216	-0.728523	0.225655	-3.22848	0.00124451	0.00739249
DAGLA	82.2962	-0.680008	0.210739	-3.22678	0.00125192	0.00742694
SNORA33	47.8187	0.871603	0.271602	3.20912	0.0013314	0.00782252
ZNF572	65.0701	-0.615367	0.191989	-3.20521	0.00134962	0.00791851
BAK1P1	56.3402	0.704391	0.219979	3.20208	0.00136439	0.00799089
FAM69B	55.7891	-0.86945	0.273043	-3.1843	0.00145103	0.00842799
FAM227B	54.9206	0.745065	0.23439	3.17874	0.00147917	0.00857351
RND1	104.76	0.775432	0.2447	3.16891	0.00153014	0.00883204
CLCF1	46.0458	0.857483	0.271097	3.16302	0.00156142	0.00898643
AC009133.17	29.7184	1.00294	0.3191	3.14303	0.00167206	0.00951663
IFIT5	24.2593	-1.10389	0.352645	-3.1303	0.00174627	0.00989488
AC093106.7	69.3885	0.614572	0.197506	3.11167	0.00186032	0.0104298
DUSP8	162.926	-0.690181	0.221867	-3.11079	0.00186589	0.0104568
FADD	67.5915	-0.806622	0.259348	-3.11019	0.00186966	0.0104697
HIST1H2BM	17.3757	1.81881	0.587135	3.09776	0.00194986	0.0108312
ZNF674	87.7434	0.587722	0.190251	3.08919	0.00200706	0.0111044
DDX47	51.1025	0.881128	0.28527	3.08875	0.00200998	0.0111143
RP5-1085F17.3	45.0452	0.781602	0.253121	3.08786	0.00201606	0.0111276
PDXP	17.0721	-1.40663	0.45699	-3.07804	0.0020837	0.0114373
RHOF	32.635	-1.09776	0.35678	-3.07684	0.00209209	0.0114722
ACSM4	57.4684	-0.631108	0.205957	-3.06427	0.00218201	0.0118969
GPT	82.6515	-0.802117	0.262375	-3.05714	0.00223461	0.0121298
SCAF1	2042.1	-0.610282	0.19969	-3.05615	0.00224199	0.012157
RP11-649A18.12	52.1911	-0.665537	0.218308	-3.04862	0.00229896	0.0124126
ACAP3	1111.76	-0.597748	0.196392	-3.04365	0.00233728	0.0125803
RP11-160H22.3	16.7224	2.87836	0.94679	3.04013	0.00236477	0.0127184
MIR3176	16.3894	-1.93874	0.638697	-3.03547	0.00240164	0.0128868
RPS14P3	37.1537	0.927442	0.305855	3.0323	0.002427	0.0129867
HTR7P1	50.7355	-0.72815	0.24103	-3.02099	0.00251952	0.0134104
PRDM16	49.3392	-0.715234	0.236827	-3.02007	0.00252719	0.0134461
AVPR2	107.357	-0.705266	0.233816	-3.01632	0.0025586	0.0135715
CBWD6	62.6758	0.651582	0.21623	3.01338	0.00258353	0.0136828
SLMO1	58.0425	0.660261	0.219482	3.00827	0.00262743	0.0138677
ZC3H12C	32.9568	-0.927263	0.308322	-3.00745	0.00263449	0.0138892
ADCY10P1	71.15	-0.606389	0.201701	-3.00638	0.00264381	0.0139254
RP11-680A11.5	21.3531	1.36116	0.453205	3.00342	0.00266965	0.0140269
TEX19	41.5417	0.719226	0.240614	2.98913	0.00279772	0.0145616
FOXO6	17.6137	-1.14409	0.383855	-2.98054	0.00287744	0.0149094
DFNB31	60.3687	1.81936	0.613092	2.96751	0.0030022	0.0154463
AC132216.1	15.1031	1.38129	0.469218	2.94382	0.00324191	0.0164598
NBPF15	44.5716	-0.711707	0.242271	-2.93764	0.00330717	0.016736
CTC-429L19.3	18.1534	-1.21483	0.413718	-2.93636	0.00332091	0.0167888
SOX15	35.0797	-0.900286	0.30673	-2.93511	0.00333432	0.0168427
BRAT1	1337.31	-0.669425	0.228231	-2.9331	0.00335597	0.0169336
PRR7-AS1	31.6039	-0.907686	0.310027	-2.92776	0.00341409	0.0171602
RP11-471B22.2	15.6825	1.21114	0.41539	2.91566	0.00354932	0.017716
MIR503HG	80.4561	-0.632451	0.217034	-2.91407	0.0035675	0.0177875
MT-TC	28.1219	-0.931322	0.320385	-2.90688	0.00365054	0.0181234
FGFR3	96.2145	-0.601959	0.207816	-2.8966	0.00377225	0.0186211
DBF4P1	17.2427	-1.36002	0.469755	-2.89518	0.00378939	0.0186917
ZCCHC3	36.2507	-1.02648	0.355787	-2.8851	0.00391284	0.0192057
SGK494	24.807	-1.02111	0.354519	-2.88027	0.00397333	0.0194545
PRSS53	47.918	-0.694216	0.242077	-2.86775	0.00413405	0.0200925
RNU1-60P	21.6267	3.65544	1.27627	2.86415	0.00418133	0.0202655
IER3	258.824	-0.677417	0.23663	-2.86277	0.00419951	0.0203323
ZNF501	52.9531	-0.592431	0.207273	-2.85821	0.00426033	0.0206124
RP4-728D4.2	39.9637	-0.864742	0.304217	-2.84252	0.00447582	0.021505
LL22NC03-2H8.5	26.8277	0.91137	0.321461	2.83509	0.00458129	0.0219366
DYRK3	20.3014	1.00557	0.355065	2.83208	0.00462459	0.0221202
C19orf71	133.317	-0.731664	0.258663	-2.82864	0.00467467	0.0223367
SSPO	41.3909	-0.908463	0.321473	-2.82594	0.00471422	0.0224869
CYP51A1	39.4571	-1.07639	0.381254	-2.8233	0.00475326	0.0226576
AC006033.22	67.2716	0.759462	0.269254	2.82061	0.00479322	0.0227932
RP11-138I1.3	25.2398	0.99615	0.353595	2.81721	0.00484427	0.0229809
HIST1H2BF	25.5966	1.49133	0.530154	2.81301	0.00490799	0.0232276
PLEC	6962.71	-0.736144	0.262452	-2.80487	0.00503374	0.0237062
RP11-347I19.8	35.8021	-0.754726	0.269213	-2.80345	0.00505587	0.0237895
AP001062.7	44.8837	-0.71759	0.256874	-2.79355	0.0052133	0.024365
RP11-958N24.2	21.0436	-1.12366	0.403195	-2.78688	0.00532182	0.0247887
DOC2A	82.4214	-0.649275	0.233515	-2.78044	0.00542845	0.0251924
ARIH2OS	45.0641	0.788509	0.284694	2.76967	0.00561128	0.0258936
WDR90	1096.01	-0.598952	0.216471	-2.76689	0.00565943	0.0260811
HNRNPCP1	36.1737	0.739416	0.267575	2.7634	0.00572029	0.0262743
RP11-863K10.7	35.6853	-0.759437	0.275345	-2.75813	0.00581333	0.0266399
RANGRF	28.0825	0.86164	0.312932	2.75344	0.00589722	0.0269443
KIAA1614	37.0033	-0.732228	0.266188	-2.7508	0.00594502	0.0270913
CTC-429P9.1	42.6162	-0.696019	0.253177	-2.74914	0.00597512	0.0272106
CTD-2313J17.1	16.1264	1.99739	0.730477	2.73437	0.00624996	0.0282673
HIST2H2BF	48.4905	0.907765	0.332278	2.73194	0.00629618	0.0284116
APC2	126.024	-0.618074	0.22727	-2.71956	0.00653682	0.029284
RELL2	408.64	-0.612332	0.225546	-2.71489	0.00662975	0.0296469
MSTO2P	42.117	-0.766439	0.283758	-2.70103	0.00691252	0.030684
CRIP2	52.1681	-1.04395	0.387424	-2.6946	0.00704741	0.0311954
IRF2BP1	908.53	-0.590313	0.21927	-2.69218	0.00709869	0.03133
RP11-46F15.2	63.7724	-0.598595	0.222877	-2.68576	0.00723652	0.031837
ANO9	57.8786	-0.742906	0.277244	-2.67961	0.00737079	0.032315
RP11-16E23.4	24.0693	2.06829	0.772747	2.67654	0.00743873	0.0325717
RTN4R	24.9829	-1.18612	0.4445	-2.66844	0.00762036	0.0332307
SNORD63	42.0672	0.707774	0.265396	2.66686	0.00765642	0.0333524
HIST1H2AE	71.4082	0.844815	0.316968	2.6653	0.007692	0.0334695
AC144831.1	16.1673	-1.1451	0.430334	-2.66095	0.00779208	0.033799
TFAP2C	26.611	-0.887097	0.334101	-2.65517	0.00792678	0.0342441
RP5-1112D6.4	33.8117	0.725873	0.274191	2.64733	0.00811305	0.0348643
AGRN	2177.21	-0.741219	0.28007	-2.64655	0.00813178	0.0349231
HSPA6	730.396	-0.832164	0.315026	-2.64157	0.00825232	0.0352988
MAPK8IP1	36.9035	0.878072	0.332796	2.63847	0.00832814	0.0355464
RAB11FIP4	28.2985	-0.762792	0.289259	-2.63706	0.00836291	0.0356728
KCTD7	46.1321	0.655943	0.249062	2.63365	0.00844724	0.0359883
RP11-61J19.4	95.6676	0.8686	0.329868	2.63318	0.00845905	0.0360276
LAMA5	72.1901	-0.705979	0.268727	-2.62713	0.00861095	0.0365288
LHX4	33.8102	-0.803716	0.306225	-2.62459	0.00867534	0.0367682
HES4	14.9697	-1.34103	0.512466	-2.61681	0.00887551	0.0374222
FOXO3B	68.6897	0.698699	0.267854	2.6085	0.00909394	0.0381231
RP1-111C20.4	29.9835	0.764407	0.293127	2.60776	0.00911356	0.0381938
C1orf147	14.4526	1.13417	0.435929	2.60173	0.00927542	0.0386388
SHH	14.4128	-1.11551	0.428843	-2.60121	0.00928958	0.0386745
SLC35E2	30.1246	-0.754576	0.290336	-2.59897	0.00935028	0.0388573
SLC26A1	141.45	-0.594841	0.228944	-2.5982	0.00937143	0.0389219
RP11-513M16.7	17.3272	0.943566	0.363723	2.59419	0.00948139	0.0392845
AC008982.2	42.1723	-0.681328	0.263246	-2.58818	0.00964842	0.0397815
CEBPA	36.7471	-0.970921	0.375743	-2.58401	0.00976599	0.0401639
PROB1	60.4233	-0.671367	0.260027	-2.58192	0.00982527	0.0403479
RP11-480I12.5	41.0413	0.634312	0.245667	2.582	0.00982299	0.0403479
C16orf46	29.9876	0.750273	0.29138	2.5749	0.010027	0.0410427
GPSM1	214.839	-0.743679	0.289431	-2.56946	0.0101858	0.0416313
TPGS1	61.4444	-0.828622	0.32274	-2.56746	0.0102447	0.0418226
RP11-96K19.4	46.8082	-0.638996	0.248992	-2.56633	0.0102781	0.041922
PLA2G2C	39.5119	0.628101	0.244812	2.56564	0.0102985	0.0419558
APOC2	39.832	-0.713995	0.27877	-2.56124	0.01043	0.0424171
MC1R	42.1936	-0.658166	0.257398	-2.55699	0.0105581	0.0428374
OPN1SW	27.8563	-0.862842	0.338116	-2.55191	0.0107133	0.0434038
HIST1H1E	33.3919	0.874534	0.344007	2.5422	0.0110157	0.0443826
RP11-968A15.2	25.6207	0.992595	0.390573	2.54138	0.0110416	0.044474
CTD-2517M14.5	15.8123	-1.16585	0.459129	-2.53926	0.0111088	0.0446929
CIRBP-AS1	43.4862	-0.68866	0.271585	-2.53571	0.011222	0.0449787
LAT	20.0744	-1.00008	0.395299	-2.52993	0.0114084	0.045609
C11orf89	24.0007	-0.919392	0.364592	-2.5217	0.011679	0.0464993
CTA-445C9.14	36.1482	-0.694559	0.27548	-2.52127	0.0116931	0.0465311
MIR4664	24.639	-0.962868	0.382235	-2.51904	0.0117674	0.0467462
RASA4DP	19.874	-1.05627	0.419931	-2.51534	0.0118919	0.0471193
CTC-448F2.6	17.3443	0.986408	0.3923	2.51442	0.0119228	0.0472034
GOLGA8H	26.5649	-0.834467	0.332091	-2.51276	0.0119789	0.047356
ZNF837	19.5647	-1.05515	0.421765	-2.50174	0.0123583	0.0485005
EEF1A1P3	14.6122	1.14358	0.457361	2.50039	0.0124058	0.048573
JAM3	62.3288	-0.592985	0.237411	-2.49771	0.0124998	0.0489134
PRDM13	15.213	-1.13314	0.454976	-2.49055	0.0127546	0.0497283
CCDC154	36.6487	-0.782165	0.314248	-2.489	0.0128101	0.0498747
RHPN1	150.17	-0.608262	0.244684	-2.48591	0.0129222	0.0502688
RP5-894D12.3	16.7979	0.920694	0.370847	2.48268	0.01304	0.0505991
RP11-26J3.3	41.759	0.730328	0.294844	2.477	0.0132491	0.0512102
AC139100.2	70.7435	0.99984	0.40413	2.47406	0.0133588	0.0515911
RP11-500C11.3	100.989	-0.63497	0.256723	-2.47337	0.0133845	0.051676
RRAD	211.175	1.72492	0.697709	2.47227	0.0134258	0.0517922
AC091729.9	41.0808	-0.591783	0.239534	-2.47056	0.0134902	0.0519972
CILP2	18.6085	-1.19873	0.48529	-2.47013	0.0135063	0.0520303
SEC63P1	33.6782	0.709796	0.288767	2.45803	0.0139703	0.0534765
SMG1P1	38.3895	0.774711	0.315352	2.45665	0.0140239	0.0536372
FAM27A	31.7774	0.846203	0.34493	2.45326	0.0141568	0.0540859
PPP1R16A	283.93	-0.751938	0.307633	-2.44427	0.0145146	0.0550737
AC116366.5	23.4101	-0.844822	0.346916	-2.43523	0.0148822	0.0562227
RP11-182L21.6	58.4913	0.614516	0.252542	2.43332	0.0149611	0.0564436
KCTD6	57.8377	-0.625823	0.259079	-2.41557	0.0157105	0.0586335
CTD-2105E13.13	17.376	1.06019	0.439493	2.41229	0.0158525	0.0589805
HPCAL4	17.4565	-1.35418	0.56204	-2.40939	0.015979	0.0593165
GRIN1	28.1564	-0.931151	0.38903	-2.39352	0.0166876	0.061568
ATP1B1	50.9571	0.670213	0.280037	2.3933	0.0166975	0.0615716
HMX3	619.088	-0.726485	0.304042	-2.38942	0.0168749	0.0621597
GOLGA8T	51.5655	-0.635322	0.26662	-2.38287	0.0171781	0.0629593
MRPL53	41.6299	0.617322	0.259151	2.38209	0.0172146	0.0630761
RP11-645C24.5	14.6248	-1.1115	0.467452	-2.37779	0.0174167	0.0636319
SCLY	50.9443	0.63537	0.267609	2.37425	0.0175847	0.0640939
POU4F1	22.2396	-0.886372	0.373353	-2.37409	0.0175925	0.0641054
ARG2	41.9154	0.966019	0.407385	2.37127	0.0177272	0.0644777
RP11-977G19.5	39.9439	0.604824	0.25515	2.37046	0.0177657	0.0645502
ASPDH	20.8462	-0.982707	0.414734	-2.36949	0.0178128	0.064697
HEXIM2	42.8047	0.60994	0.257839	2.36559	0.0180016	0.0652281
RP11-578F21.6	14.7185	-1.19883	0.507088	-2.36414	0.018072	0.0653381
SNORD100	14.6942	1.19349	0.507625	2.35112	0.018717	0.0671972
ZNF571	19.4168	0.796283	0.339642	2.34448	0.0190537	0.0682825
SNORD12	15.3224	1.08992	0.465292	2.34245	0.0191577	0.0685842
RP11-71H17.9	40.5346	-0.599674	0.256024	-2.34225	0.0191678	0.0686026
ICAM5	121.713	-0.608726	0.260769	-2.33435	0.0195776	0.0697276
RP1-68D18.2	21.2577	-1.07851	0.462339	-2.33272	0.0196628	0.0699386
CPVL	22.7106	0.73679	0.316269	2.32963	0.0198259	0.0702512
OPLAH	488.531	-0.624245	0.268474	-2.32516	0.0200632	0.0708554
C20orf24	52.5993	-0.844233	0.363648	-2.32157	0.0202561	0.071393
PRR7	104.205	-0.929368	0.400826	-2.31863	0.0204148	0.0718428
CTA-390C10.10	31.4508	0.683295	0.295352	2.3135	0.0206954	0.0724807
NFE4	16.1621	0.852306	0.369057	2.30941	0.0209206	0.0731773
SMAD9	14.2567	0.913768	0.396737	2.30321	0.0212672	0.0741936
RP11-680H20.1	26.4797	0.718538	0.312321	2.30064	0.021412	0.0745578
LRFN4	349.493	-0.671579	0.291959	-2.30025	0.0214342	0.0745978
TCHH	17.04	0.848328	0.369482	2.29599	0.0216764	0.0752175
FAM156B	29.1286	-0.762393	0.332838	-2.29058	0.0219876	0.0760884
CTC-559E9.8	50.1878	-0.678131	0.297267	-2.28122	0.0225354	0.0776188
NOX1	20.265	0.789606	0.346213	2.28069	0.0225665	0.0776812
CHI3L2	26.6934	-0.644901	0.283528	-2.27455	0.0229327	0.0786295
HOXC11	30.0446	-0.658932	0.29128	-2.26219	0.0236854	0.0806022
EEF1A1P22	22.8069	0.756387	0.335187	2.25661	0.0240322	0.0815046
MIR29B1	21.2413	1.00019	0.443236	2.25656	0.0240355	0.0815046
RP11-849F2.5	25.2587	-0.833483	0.369479	-2.25583	0.0240811	0.0816184
KIFC2	602.582	-0.679067	0.30183	-2.24984	0.0244594	0.0826188
AMDHD2	81.556	-0.625014	0.278202	-2.24662	0.0246642	0.0830682
RPL23AP64	14.3828	-1.10385	0.493833	-2.23528	0.0253993	0.0848844
SNORA34	27.1305	0.820519	0.367514	2.23262	0.0255739	0.0853446
LIF	95.8254	1.06174	0.475736	2.23179	0.0256291	0.0854261
CACNB2	14.7942	-0.917349	0.411579	-2.22885	0.0258238	0.0858681
CTD-2561J22.2	33.657	-0.684776	0.307327	-2.22817	0.0258693	0.0859789
RP11-421N8.1	15.0392	0.926954	0.41706	2.22259	0.0262435	0.0867888
SNORA5C	22.5279	-0.850528	0.383055	-2.22038	0.0263931	0.0872392
RP11-70L8.4	14.1841	1.0087	0.455049	2.21668	0.0266447	0.0879451
HIC1	519.804	-0.629372	0.284189	-2.21462	0.0267859	0.0883691
CTD-2574D22.4	39.6578	-0.596484	0.269566	-2.21276	0.0269144	0.0886458
HIST1H3D	20.9646	1.21403	0.549378	2.20983	0.0271172	0.0891592
RP11-446N19.1	31.1772	0.610187	0.276258	2.20875	0.0271918	0.0893472
CTD-2622I13.3	28.6996	-1.04536	0.473803	-2.20632	0.0273618	0.0898512
RP11-51J9.5	33.5558	0.688307	0.312606	2.20183	0.0276772	0.0906631
RP11-338I21.1	19.8684	0.868492	0.394936	2.19907	0.0278729	0.0910985
CAPN15	1714.31	-0.676792	0.30785	-2.19845	0.0279169	0.091147
LEKR1	22.5801	0.833056	0.379097	2.19747	0.0279866	0.0912781
RP11-68I3.4	15.6253	-0.944819	0.429975	-2.19738	0.0279932	0.0912781
RP11-958N24.1	105.633	-1.12859	0.514339	-2.19425	0.0282173	0.0917823
BEGAIN	26.03	-0.710606	0.324058	-2.19284	0.0283191	0.0920487
GRHL1	27.9384	0.735534	0.335639	2.19144	0.0284197	0.0923107
AC022007.5	33.4445	0.609464	0.278581	2.18775	0.0286881	0.0929217
DISP1	22.3664	-0.964656	0.441058	-2.18714	0.028732	0.0930204
AC007228.9	22.8336	0.764419	0.349574	2.18671	0.0287635	0.0931006
RP1-90J20.11	29.6406	-0.686736	0.314345	-2.18466	0.028914	0.0934054
RP1-286D6.5	22.3913	-0.796419	0.366146	-2.17514	0.0296195	0.0952272
HIST1H2BD	69.7301	0.607991	0.281257	2.16169	0.0306419	0.0976543
FAM201A	22.7669	-0.730572	0.338515	-2.15817	0.0309148	0.0982758
RP3-342P20.2	14.5506	-1.3251	0.615821	-2.15176	0.0314159	0.0994585
RP11-408A13.4	20.7808	0.733565	0.341292	2.14937	0.0316047	0.0999196

## Sheet: DESeq2_CRYBMIM_4hr-vs-PBS
	baseMean	log2FoldChange	lfcSE	stat	pvalue	padj
ABL2	2010.36	3.64965	0.069241	52.7094	0	0
AC013394.2	1447.3	3.04652	0.0646219	47.1437	0	0
ADAM17	1991.13	2.75208	0.0517795	53.1499	0	0
AHR	5491.61	2.79739	0.0697407	40.1113	0	0
ALAS1	4014.38	1.93589	0.0435984	44.4027	0	0
ANKRD10	3565.84	2.53982	0.0543215	46.7554	0	0
ANKRD28	5757.6	3.00459	0.0674571	44.5408	0	0
ATF3	2011.12	6.06522	0.0914495	66.3232	0	0
ATF4	15263.4	2.21372	0.0338694	65.3606	0	0
ATP2B1	2934.42	2.64333	0.0644154	41.0356	0	0
BAG3	1931.81	2.47165	0.0564029	43.8213	0	0
BTG1	1884.82	3.27805	0.0778229	42.1218	0	0
BTG2	2003.84	2.96523	0.0527982	56.1616	0	0
C16orf72	2190.92	3.16159	0.0640746	49.3423	0	0
C1orf63	2320.1	2.10383	0.0502388	41.8766	0	0
C3AR1	517.156	5.33803	0.12817	41.6482	0	0
CCNL1	5254.41	3.0019	0.051926	57.811	0	0
CCR2	6213.54	-2.04853	0.0504653	-40.5928	0	0
CD55	996.274	3.23036	0.0826899	39.0659	0	0
CD83	2524.57	4.11204	0.0608278	67.6014	0	0
CHD2	4214.83	2.31146	0.048844	47.3233	0	0
CLK1	4146.42	3.03391	0.0583851	51.9637	0	0
CPEB2	3986.3	2.56701	0.0620871	41.3452	0	0
CREBRF	1046.5	5.18981	0.100965	51.402	0	0
CSF1	579.986	6.23862	0.157517	39.606	0	0
CSRNP1	2063.6	5.49886	0.0898017	61.2333	0	0
CTB-89H12.4	660.275	3.61143	0.0957598	37.7134	0	0
CYTH2	1848.93	2.24583	0.0532837	42.1485	0	0
DEDD2	1392.61	3.54322	0.0860388	41.1817	0	0
DENND5A	2068.44	2.3546	0.0596888	39.4478	0	0
DNAJA4	3499.49	1.58301	0.0417168	37.9464	0	0
DNAJB1	15602.4	3.22857	0.0363847	88.7344	0	0
DSTN	3570.07	2.45911	0.0536681	45.8207	0	0
DUSP1	2354.68	8.09973	0.161682	50.0966	0	0
DUSP10	889.774	3.59334	0.0743823	48.3091	0	0
EGR1	3143.93	5.41397	0.0791979	68.36	0	0
EGR3	2036.22	6.52267	0.106276	61.3745	0	0
EIF1	23579.3	1.9784	0.0420032	47.1012	0	0
EMP1	3343.22	6.821	0.0902431	75.5847	0	0
ERRFI1	436.814	5.74666	0.144454	39.7819	0	0
EZR	5220.71	2.35328	0.0364124	64.6285	0	0
FEN1	3563.01	-1.96663	0.0453842	-43.3328	0	0
FOS	12944.3	5.36162	0.0602534	88.9846	0	0
FOSB	13445.4	10.0106	0.132668	75.4565	0	0
HBP1	1453.26	4.01108	0.0745571	53.7988	0	0
HECA	1314.43	2.85299	0.0754468	37.8145	0	0
HIF1A	3456.01	3.73636	0.0663373	56.3237	0	0
HIPK1	9691.79	2.71129	0.0512434	52.9101	0	0
HSPA6	730.396	5.17806	0.116684	44.3768	0	0
IDS	2693.17	1.75065	0.0464371	37.6994	0	0
IER2	1716.92	2.4759	0.0575429	43.0271	0	0
IER5	3385.27	4.71833	0.0668757	70.5538	0	0
IFRD1	1293.87	2.67801	0.0610342	43.8772	0	0
IL8	14304.2	9.64937	0.106373	90.7123	0	0
JMJD1C	6098.5	2.43085	0.0611885	39.7273	0	0
JUN	3747.95	7.61127	0.125921	60.4449	0	0
KCNN2	2162.27	2.60604	0.0530848	49.0921	0	0
KLF4	1029.66	6.24708	0.129639	48.1881	0	0
KLF6	8323.63	5.58959	0.0567514	98.4926	0	0
KLF9	803.267	3.59911	0.0835328	43.0862	0	0
LDLR	5808.77	2.75874	0.0486078	56.7552	0	0
LRP12	1053.97	3.53669	0.0764219	46.2785	0	0
MAFF	1062.88	5.94289	0.103887	57.2055	0	0
MAN1A1	1639.99	2.56811	0.0610153	42.0896	0	0
MAP1LC3B	3115.81	2.32898	0.0545118	42.7244	0	0
MCL1	24799	3.88845	0.0476902	81.5355	0	0
MCM4	13905.4	-1.25212	0.0331793	-37.7379	0	0
MIR24-2	971.762	3.80684	0.0865324	43.9932	0	0
MT-RNR1	33843.5	3.58427	0.0572145	62.6463	0	0
MT-RNR2	200768	2.93614	0.0583453	50.3235	0	0
MXD1	2540.84	3.56404	0.0591354	60.2691	0	0
NAB2	998.505	3.31718	0.0878085	37.7775	0	0
NEAT1	5586.05	2.77091	0.0500337	55.3809	0	0
NECAP1	1099.2	2.90245	0.0742703	39.0795	0	0
NEU1	4931.18	4.33793	0.0496837	87.3109	0	0
NFAT5	1612.36	3.64176	0.0760577	47.8815	0	0
NFKB2	1119.33	3.59401	0.0827773	43.4178	0	0
NFKBIA	2796.39	3.68767	0.0510037	72.302	0	0
NR4A1	928.368	5.12142	0.129826	39.4482	0	0
NR4A2	1499.96	7.3402	0.148378	49.4696	0	0
NXF1	4074.51	1.74825	0.0442261	39.5299	0	0
OTUD1	833.626	7.404	0.167444	44.2179	0	0
PCNA	6439.13	-1.53625	0.0381428	-40.2763	0	0
PELI1	958.217	5.39056	0.105828	50.9371	0	0
PHLDA1	2097.11	4.48438	0.0686167	65.354	0	0
PMAIP1	4645.45	4.66165	0.058882	79.1693	0	0
PNRC1	1246.25	3.36421	0.0637997	52.7308	0	0
PPP1R15A	15427.4	6.06938	0.0531056	114.289	0	0
PPP1R15B	6781.21	2.05658	0.0490391	41.9375	0	0
PPTC7	3492	2.37786	0.0567836	41.8757	0	0
PTGER2	999.652	4.79123	0.0844391	56.7418	0	0
PTGER4	3775.69	1.59786	0.0387036	41.2844	0	0
RAB11FIP1	6879.74	3.1168	0.0566486	55.0199	0	0
RC3H1	3582.74	3.20439	0.067565	47.4268	0	0
RIPK2	2373.51	3.29309	0.0592531	55.5767	0	0
RSRC2	4116.03	2.75066	0.0559534	49.1598	0	0
S100A10	2747.43	2.97271	0.0527739	56.3292	0	0
SAT1	1253.15	3.30128	0.074966	44.0371	0	0
SDCBP	5918.12	2.54817	0.0644385	39.5443	0	0
SERPINE1	2932.79	9.68498	0.201238	48.127	0	0
SESN2	1445.5	3.8897	0.0915176	42.5022	0	0
SGK1	1864.75	9.19514	0.197954	46.451	0	0
SIAH2	2051.74	2.31666	0.0566806	40.8722	0	0
SIK3	1663.42	2.2206	0.0586676	37.8505	0	0
SLC38A2	11513.4	3.35326	0.06114	54.8455	0	0
SNX30	2170.29	2.2506	0.0562414	40.0168	0	0
SOCS3	2887.39	4.78178	0.0849712	56.2753	0	0
TIPARP	2610.95	4.06015	0.0769893	52.7365	0	0
TNFAIP3	1643.2	3.33249	0.0591097	56.3781	0	0
TNFSF9	1446.38	4.61849	0.0723192	63.8626	0	0
TP53BP2	3144.86	3.30088	0.0501465	65.8247	0	0
TRIB1	2410.25	4.99284	0.0703125	71.0093	0	0
TRIM25	10479.7	2.62466	0.0352671	74.4224	0	0
TSC22D2	548.63	3.12047	0.0829299	37.6278	0	0
TSC22D3	6069.15	5.53196	0.059718	92.6347	0	0
UBAP1	2580.38	2.09485	0.0488603	42.8743	0	0
UBC	14491.3	1.98948	0.0501753	39.6506	0	0
VEGFA	4225.49	1.88243	0.0444762	42.3244	0	0
YPEL5	2106.68	3.22297	0.0678173	47.5243	0	0
ZBTB10	2388.6	3.42279	0.0634563	53.9393	0	0
ZFP36L1	1367.5	4.62929	0.0818695	56.5447	0	0
REL	897.836	3.13598	0.0835979	37.5126	5.73135e-308	1.07059e-305
ITGA5	8111.45	1.424	0.0379609	37.5123	5.80288e-308	1.07514e-305
EP300	5674.15	1.46885	0.0392995	37.3759	9.63712e-306	1.77113e-303
RN7SK	1894.31	4.84478	0.129746	37.3405	3.61192e-305	6.58495e-303
KBTBD8	3214.29	2.33694	0.0625944	37.3346	4.50112e-305	8.14096e-303
H3F3B	18747.6	1.07142	0.028752	37.2641	6.2703e-304	1.12515e-301
DBI	5035.86	1.96549	0.0527937	37.2296	2.26885e-303	4.03945e-301
DUSP5	708.981	2.98703	0.0802756	37.2097	4.74897e-303	8.38948e-301
VIM	10915.1	2.14576	0.0578684	37.08	5.90475e-301	1.0351e-298
RGCC	977.589	8.77459	0.236759	37.0612	1.18371e-300	2.0592e-298
ANXA1	1386.62	2.42667	0.0658106	36.8735	1.22703e-297	2.11839e-295
WEE1	2936.35	2.48501	0.0678811	36.6082	2.11654e-293	3.6266e-291
RP11-800A3.4	2043.3	-2.3043	0.0631423	-36.4938	1.38979e-291	2.36357e-289
KCNE1	653.344	3.18641	0.0874194	36.4497	6.96632e-291	1.17597e-288
UBE2H	2051.11	2.36987	0.0651628	36.3685	1.34114e-289	2.24729e-287
PELI2	618.353	3.89435	0.107437	36.2477	1.07951e-287	1.79568e-285
MDM2	2706.06	2.54959	0.0703473	36.2428	1.28919e-287	2.12894e-285
FAM53C	1854.31	1.84674	0.0512259	36.0509	1.33457e-284	2.18802e-282
TREM1	548.234	3.76961	0.104933	35.9238	1.29725e-282	2.11165e-280
COQ10B	1258.68	2.45634	0.0684758	35.8716	8.47194e-282	1.36927e-279
PLK3	996.367	3.63119	0.101344	35.8304	3.7115e-281	5.95643e-279
THBS1	352.555	3.76648	0.106658	35.3138	3.60548e-273	5.74582e-271
C18orf25	1688.52	2.16409	0.0613633	35.2668	1.89398e-272	2.99736e-270
TNF	1616.33	2.03475	0.0577539	35.2314	6.60079e-272	1.03742e-269
ING1	745.793	2.80086	0.0797504	35.1204	3.2955e-270	5.14392e-268
STK17B	1255.96	2.51368	0.071806	35.0065	1.79056e-268	2.77585e-266
RNF19B	949.59	2.44317	0.0698958	34.9545	1.10598e-267	1.70298e-265
WHAMM	816.981	2.58254	0.073978	34.9095	5.32775e-267	8.14859e-265
PARP1	6306.38	-1.3531	0.0389645	-34.7266	3.12957e-264	4.75466e-262
LATS2	666.825	2.66608	0.0770297	34.6111	1.72032e-262	2.59632e-260
KDM6A	1626.12	2.29919	0.0665245	34.5616	9.53484e-262	1.42954e-259
KDM5C	1667.19	1.93227	0.0559156	34.557	1.12054e-261	1.66902e-259
PLK2	388.626	3.78619	0.110005	34.4184	1.33761e-259	1.97941e-257
GOLGB1	2758.8	2.04438	0.059791	34.1921	3.17167e-256	4.66317e-254
SNHG5	2705.42	1.74595	0.0510872	34.1758	5.53756e-256	8.08945e-254
RP11-578F21.12	1332.37	1.89501	0.0557347	34.0005	2.19036e-253	3.17937e-251
TNFRSF10B	2921.7	1.52976	0.0450753	33.9379	1.84104e-252	2.65541e-250
KLHL24	880.608	3.12905	0.0925456	33.8108	1.36691e-250	1.95915e-248
PTGS2	1314.82	9.93511	0.294205	33.7694	5.55197e-250	7.90773e-248
CPEB4	999.255	2.37377	0.0708196	33.5185	2.59187e-246	3.6687e-244
RMRP	473.738	5.49394	0.164341	33.4301	5.01462e-245	7.05421e-243
IL1B	314.113	3.86736	0.116468	33.2052	9.05225e-242	1.26559e-239
RP11-301G19.1	11004.9	1.43581	0.0432735	33.1798	2.10567e-241	2.92598e-239
KDM3A	3206.67	1.78368	0.053944	33.0653	9.37243e-240	1.29447e-237
TET2	1456.72	2.52155	0.0765986	32.919	1.17604e-237	1.6145e-235
CD180	3759.88	-1.89723	0.0576522	-32.9082	1.67829e-237	2.29021e-235
DGKE	1448.27	2.01874	0.0618921	32.6171	2.34516e-233	3.18118e-231
DNAJB4	579.999	3.33856	0.102478	32.5785	8.28142e-233	1.11672e-230
RGS2	1147.04	9.74272	0.299146	32.5684	1.14945e-232	1.54088e-230
ZBTB43	1106	2.53774	0.0780667	32.5073	8.39986e-232	1.11944e-229
SPAG9	4466.83	1.87416	0.0576738	32.4959	1.21958e-231	1.61587e-229
THAP9-AS1	1069.91	2.63721	0.081195	32.4799	2.04746e-231	2.69709e-229
HIPK3	8135.62	1.96197	0.0604776	32.4413	7.17891e-231	9.40231e-229
KMT2E	3768.29	1.77055	0.0545829	32.4379	8.03137e-231	1.04587e-228
TP53INP2	363.313	3.73602	0.115232	32.4217	1.3589e-230	1.75955e-228
RP11-473I1.9	677.973	2.59986	0.0806611	32.2319	6.30805e-228	8.12171e-226
GEMIN4	2832.06	-1.78847	0.0557018	-32.108	3.41148e-226	4.36765e-224
NFIL3	1086.02	2.39599	0.0746409	32.1002	4.38418e-226	5.58162e-224
RHOB	824.248	3.85224	0.120261	32.0325	3.84927e-225	4.8734e-223
SIRT1	2002.17	1.87197	0.0584708	32.0155	6.64127e-225	8.36177e-223
RRP12	5143.89	2.16352	0.0676312	31.9899	1.50546e-224	1.88505e-222
GTPBP2	2495.88	1.53087	0.0478637	31.984	1.81906e-224	2.26527e-222
NAMPT	1462.36	2.09713	0.0659007	31.8226	3.15233e-222	3.90426e-220
HDAC9	363.446	3.86841	0.121567	31.8211	3.30129e-222	4.06666e-220
TSPYL2	614.512	2.76414	0.087147	31.7181	8.7332e-221	1.07001e-218
INPP5F	1187.26	2.01183	0.0636605	31.6025	3.41146e-219	4.15742e-217
PDIA4	5908.42	-1.28627	0.0407433	-31.5701	9.50505e-219	1.15218e-216
SLC7A11	1211.33	3.30293	0.104797	31.5175	4.99562e-218	6.02356e-216
P2RY2	2012.33	-2.41498	0.0767138	-31.4803	1.61595e-217	1.9382e-215
MMP19	252.867	5.09612	0.162371	31.3856	3.18424e-216	3.79925e-214
DAAM1	475.68	3.2191	0.102579	31.3817	3.59986e-216	4.27277e-214
ATF7IP	2269.95	1.8626	0.059391	31.3616	6.74997e-216	7.97021e-214
ZFAND2A	589.973	2.75979	0.0881653	31.3024	4.32481e-215	5.08031e-213
GBP2	318.164	4.02344	0.128678	31.2674	1.29392e-214	1.51217e-212
UBR4	5124.78	1.3016	0.0417566	31.1712	2.61499e-213	3.04046e-211
UNG	1930.26	-1.58218	0.0507592	-31.1704	2.68617e-213	3.10737e-211
ANKRD27	4461.1	-1.15561	0.0370881	-31.1586	3.87701e-213	4.46228e-211
PLIN2	856.918	2.19845	0.0705742	31.151	4.92238e-213	5.63699e-211
MCM10	1707.66	-1.98803	0.0639697	-31.0776	4.8301e-212	5.50366e-210
MTRNR2L12	853.224	3.03986	0.0982143	30.9513	2.44048e-210	2.76697e-208
PRNP	1452.18	1.76681	0.0572988	30.835	8.89279e-209	1.00326e-206
MIEF1	3665.36	-1.30649	0.0424533	-30.7747	5.71376e-208	6.41433e-206
WDR49	880.884	2.96974	0.0965197	30.7682	6.98749e-208	7.80578e-206
MTHFD2	10825.6	1.6607	0.0540511	30.7246	2.67255e-207	2.97097e-205
LINC00938	860.955	2.27182	0.0740816	30.6665	1.59372e-206	1.76307e-204
HNRNPU	30846.4	1.10442	0.0360457	30.6394	3.65952e-206	4.02883e-204
RBM39	10347.1	1.51996	0.0497209	30.5699	3.08051e-205	3.37508e-203
C16orf54	2069.75	1.99673	0.0654149	30.5241	1.24926e-204	1.36217e-202
KLF10	2091.16	1.77465	0.058166	30.5101	1.91233e-204	2.07525e-202
SRGAP2	3142.72	1.30898	0.0429653	30.4659	7.37209e-204	7.96221e-202
NCOA3	2268.08	1.95721	0.0647617	30.2218	1.22665e-200	1.31859e-198
JAG1	512.716	2.78244	0.0926351	30.0366	3.26575e-198	3.49405e-196
MYLIP	1702.06	1.62331	0.0541572	29.974	2.14111e-197	2.28008e-195
HIST2H2BE	236.317	4.64438	0.155228	29.9198	1.0876e-196	1.15281e-194
SNX9	469.907	2.53476	0.0848013	29.8906	2.61083e-196	2.75454e-194
ICMT	2580.58	-1.56198	0.0523344	-29.8462	9.82657e-196	1.03197e-193
SEPHS2	5688.22	-1.14985	0.038534	-29.8399	1.18763e-195	1.24151e-193
RBM5	2355.38	1.8198	0.0611343	29.7672	1.03999e-194	1.0822e-192
OSR2	369.557	4.9914	0.167968	29.7163	4.72336e-194	4.89276e-192
RRP1B	2795.85	-1.39868	0.0471046	-29.693	9.44146e-194	9.73581e-192
DHCR24	6151.36	-1.14037	0.0385238	-29.6016	1.42347e-192	1.46124e-190
TAGAP	1120.1	1.73195	0.0588165	29.4466	1.39074e-190	1.42124e-188
FUT4	8948.29	1.22625	0.0416533	29.4394	1.72219e-190	1.75209e-188
ARHGAP1	3535.87	-1.52308	0.0517439	-29.435	1.95664e-190	1.98178e-188
PER1	1285.5	3.29851	0.112405	29.3448	2.78382e-189	2.8071e-187
LYN	6309.47	1.42736	0.0487817	29.2603	3.32368e-188	3.33671e-186
GAB2	5644.67	1.24365	0.0426052	29.19	2.59433e-187	2.59307e-185
ZMYM5	794.227	2.36933	0.0811852	29.1842	3.07655e-187	3.06164e-185
SERTAD1	789.463	3.34592	0.114742	29.1604	6.16752e-187	6.11094e-185
RB1CC1	3259.46	1.90455	0.0653312	29.1523	7.81851e-187	7.71325e-185
MLLT4	2053.59	1.51246	0.0519312	29.1243	1.76874e-186	1.7374e-184
CSNK1A1	3620.17	1.27794	0.0439471	29.0791	6.59337e-186	6.44877e-184
GLA	3600.45	1.58879	0.054639	29.078	6.80911e-186	6.63132e-184
AHNAK	18219	1.52614	0.0525759	29.0273	2.97503e-185	2.88502e-183
PHLPP1	3902.25	1.11418	0.0384392	28.9855	1.00311e-184	9.68635e-183
IPMK	969.39	2.65568	0.0916432	28.9785	1.22874e-184	1.18151e-182
HLA-B	20621.8	0.953205	0.0329586	28.9212	6.45636e-184	6.1821e-182
AFF4	2502.37	1.7451	0.0604175	28.8839	1.90031e-183	1.81197e-181
RP11-632K20.7	972.602	2.19765	0.0761284	28.8676	3.04495e-183	2.89131e-181
ALDH1B1	1509.6	-1.57553	0.0551124	-28.5875	9.5964e-180	9.07437e-178
DDX39B	2740.52	1.50986	0.0530002	28.4879	1.65548e-178	1.55896e-176
ANTXR2	1760.79	1.64353	0.0578581	28.4062	1.69574e-177	1.5903e-175
CA5B	373.308	3.32801	0.117503	28.3227	1.81595e-176	1.69606e-174
BTG3	416.488	2.91302	0.102875	28.316	2.19343e-176	2.04025e-174
PPP3R1	2664.92	1.42884	0.050474	28.3085	2.71775e-176	2.51768e-174
RIT1	824.323	2.24428	0.0792936	28.3035	3.13386e-176	2.8914e-174
MT-ND2	76514.7	1.62231	0.0573295	28.298	3.66184e-176	3.3649e-174
ICAM1	832.189	2.37706	0.0843635	28.1764	1.13668e-174	1.04031e-172
EVI2A	1261.38	2.25851	0.080275	28.1347	3.68875e-174	3.36251e-172
HBEGF	882.106	2.05155	0.0730479	28.085	1.49223e-173	1.35484e-171
MYC	9174.67	-1.83687	0.0655687	-28.0144	1.08501e-172	9.81205e-171
ARL8B	8143.04	1.5216	0.0543251	28.0091	1.25719e-172	1.13241e-170
SOD2	3222.08	1.36879	0.0488818	28.0021	1.52993e-172	1.37266e-170
PNN	6958.44	1.51981	0.0543444	27.9663	4.17388e-172	3.73014e-170
ZBED6	315.601	3.48275	0.124831	27.8997	2.69412e-171	2.3983e-169
ARID4A	1870.97	1.95848	0.0702202	27.8906	3.46896e-171	3.07604e-169
HRH2	1226.86	-1.77111	0.0636212	-27.8383	1.49051e-170	1.31656e-168
EIF4A2	8646.2	1.64661	0.0591499	27.838	1.50616e-170	1.32524e-168
ZFAS1	6341.84	1.48785	0.0534519	27.8354	1.61847e-170	1.41859e-168
ZFP36	5665.57	2.55928	0.0920925	27.7903	5.68462e-170	4.96348e-168
LPCAT1	4023.51	-1.43182	0.0516171	-27.7393	2.34647e-169	2.04098e-167
NFKBID	458.591	2.51948	0.0908441	27.7341	2.71258e-169	2.35045e-167
PDGFA	411.547	2.63398	0.0949849	27.7305	2.9941e-169	2.58456e-167
MEIS1	2992.17	1.54502	0.0557512	27.7127	4.90845e-169	4.22108e-167
RPL12	31141.7	0.806586	0.0291403	27.6794	1.23583e-168	1.05877e-166
RP11-473I1.10	1919.33	1.97733	0.0714981	27.6557	2.38254e-168	2.03354e-166
CD44	14592.3	1.36961	0.0496824	27.5674	2.73779e-167	2.32804e-165
MT-ND1	68038.4	1.44076	0.052388	27.5017	1.67662e-166	1.42039e-164
EPG5	1209.07	1.88403	0.0686886	27.4286	1.25017e-165	1.05519e-163
C6orf48	5661.41	1.26956	0.0463231	27.4065	2.29237e-165	1.9277e-163
KMT2E-AS1	219.237	4.83077	0.17661	27.3528	9.98942e-165	8.36945e-163
GEMIN5	1407.91	-1.68604	0.0617999	-27.2823	6.88246e-164	5.74521e-162
DDX3Y	5990.71	1.6154	0.059249	27.2646	1.11452e-163	9.26966e-162
MYADM	12003.7	2.13791	0.0786586	27.1796	1.13037e-162	9.36726e-161
DDIT3	345.647	2.95219	0.108738	27.1496	2.55648e-162	2.11086e-160
NUMB	3150.12	1.30726	0.0481661	27.1407	3.2595e-162	2.68161e-160
KLHL15	1596.77	1.89161	0.069768	27.1129	6.93343e-162	5.68366e-160
ARID4B	1717	1.68517	0.0621768	27.1028	9.1182e-162	7.44783e-160
DENND4A	3792.1	1.63844	0.0604921	27.0852	1.47131e-161	1.19749e-159
LRRFIP2	1411.88	1.78548	0.0659299	27.0815	1.62784e-161	1.32017e-159
CD97	8757.53	1.70221	0.0629011	27.0617	2.77818e-161	2.2451e-159
SAMD8	534.428	2.79731	0.103521	27.0217	8.22306e-161	6.62174e-159
DYRK1A	3428.81	1.67762	0.0621049	27.0127	1.04936e-160	8.42039e-159
HSPA1A	2141.66	1.50321	0.0556899	26.9924	1.81503e-160	1.45132e-158
DAGLB	1487	1.83501	0.0679879	26.9902	1.92455e-160	1.53352e-158
FTSJ2	1772.5	-1.49126	0.0553722	-26.9315	9.38436e-160	7.45157e-158
EGR2	675.712	9.07603	0.337332	26.9053	1.90232e-159	1.50528e-157
RPS20	33925.4	0.799336	0.0298136	26.8111	2.39632e-158	1.88961e-156
LMNB1	10605	-1.19836	0.0447084	-26.804	2.90239e-158	2.28078e-156
NFKBIZ	202.13	4.96611	0.185374	26.7897	4.26383e-158	3.33912e-156
OSER1	946.718	1.97157	0.0736435	26.7719	6.87319e-158	5.36415e-156
OGT	14351	1.53925	0.0575546	26.7442	1.44378e-157	1.12294e-155
KLF5	220.727	3.38761	0.126774	26.7216	2.64216e-157	2.04803e-155
RUNX2	3964.74	1.45208	0.0543842	26.7005	4.64541e-157	3.58862e-155
CHTF8	2041.77	-1.35687	0.0508555	-26.681	7.82905e-157	6.02758e-155
CTNNB1	7034.69	1.46919	0.0550656	26.6807	7.88468e-157	6.04996e-155
METTL13	1530.36	-1.52251	0.0571913	-26.6213	3.84381e-156	2.93949e-154
ARMCX3	1685.21	1.71424	0.0644245	26.6084	5.42383e-156	4.1339e-154
CCNG2	487.751	3.10527	0.11674	26.5999	6.80455e-156	5.16897e-154
CHD1	3646.41	1.75402	0.0660333	26.5626	1.83472e-155	1.38908e-153
UBTF	5905.01	-0.99	0.0373157	-26.5304	4.32234e-155	3.26165e-153
PGAM5	1842.52	-1.32193	0.0498781	-26.5031	8.92628e-155	6.71356e-153
FBXO11	1673.93	1.46298	0.0552191	26.4941	1.13339e-154	8.49629e-153
DLX2	341.321	4.5319	0.171125	26.483	1.52249e-154	1.13757e-152
FOXRED2	1551.24	-1.57154	0.059468	-26.4266	6.77239e-154	5.04366e-152
GAS5	8737.4	1.50329	0.0569075	26.4163	8.9027e-154	6.60859e-152
ENSA	5826.57	0.917619	0.0347932	26.3735	2.76115e-153	2.04298e-151
NEDD9	783.464	1.99088	0.0755589	26.3487	5.31086e-153	3.9168e-151
UMPS	1742.16	-1.56856	0.0596288	-26.3054	1.66154e-152	1.22145e-150
FOXO3	851.345	1.73446	0.0659916	26.2831	2.99376e-152	2.19373e-150
TCF19	1720.07	-1.53482	0.0584382	-26.2639	4.95298e-152	3.61774e-150
TUBA4A	1082.84	-1.72501	0.0658358	-26.2017	2.54116e-151	1.85018e-149
USP12	1534.44	1.87187	0.0714519	26.1976	2.82885e-151	2.05308e-149
SLC25A33	793.83	1.74939	0.0668059	26.1862	3.81315e-151	2.75867e-149
AAED1	586.737	2.20893	0.0844836	26.1463	1.08644e-150	7.8351e-149
INSIG1	6105.76	1.34368	0.0514136	26.1347	1.47217e-150	1.05834e-148
PVRL1	2387.62	-1.4438	0.0552892	-26.1136	2.55362e-150	1.83002e-148
ENPP2	5383.75	1.46405	0.0560815	26.1058	3.13627e-150	2.24052e-148
CCL5	2858.02	1.23876	0.0474529	26.1049	3.20516e-150	2.28257e-148
CDK9	1886.86	1.53983	0.0591494	26.0328	2.10561e-149	1.49485e-147
SLC30A1	1974.56	1.47659	0.0567411	26.0233	2.69695e-149	1.90872e-147
TXNIP	10050.3	1.4954	0.0574803	26.0159	3.27068e-149	2.3076e-147
NFKB1	1867.38	1.33511	0.051364	25.993	5.93751e-149	4.17623e-147
AGO2	1224.31	1.7054	0.0657167	25.9507	1.78432e-148	1.25116e-146
HSPH1	15324.5	1.32056	0.0510682	25.8587	1.94124e-147	1.35702e-145
IER3	258.824	5.38548	0.2085	25.8296	4.12389e-147	2.87399e-145
MAPK6	5058.57	1.53606	0.0594825	25.8237	4.80662e-147	3.33958e-145
ABHD15	2744	-1.13699	0.0440818	-25.7926	1.07283e-146	7.43126e-145
SKP2	1116.01	-1.69166	0.065616	-25.7812	1.43983e-146	9.94309e-145
SELPLG	3274.89	-1.85093	0.0719562	-25.723	6.45712e-146	4.44566e-144
FAM214A	372.84	2.80768	0.109249	25.6999	1.17089e-145	8.03721e-144
GADD45B	1659.94	2.50062	0.0973702	25.6816	1.87748e-145	1.28486e-143
STRN3	697.951	2.02116	0.0788978	25.6174	9.75977e-145	6.65914e-143
SPN	18487.1	-0.789041	0.0308778	-25.5536	5.00378e-144	3.40391e-142
RPS11	61699.3	0.766636	0.0300502	25.5118	1.45671e-143	9.88003e-142
MT-ATP8	6989.97	1.31926	0.0517803	25.4781	3.44631e-143	2.3305e-141
FBXO30	1012.25	2.01312	0.0791135	25.446	7.82485e-143	5.27576e-141
IKZF1	7740.73	-1.02182	0.0401854	-25.4277	1.24606e-142	8.37657e-141
TAF7	4356.57	1.39773	0.0550178	25.4051	2.21695e-142	1.48594e-140
FNDC3B	4223.62	1.4379	0.0567038	25.3581	7.30705e-142	4.88329e-140
LYAR	1451.72	-1.43866	0.0568455	-25.3083	2.58915e-141	1.72527e-139
ATP6V1B2	10639.4	1.25712	0.0497746	25.2562	9.67954e-141	6.43111e-139
ERN1	1387.83	1.5721	0.0623201	25.2263	2.06404e-140	1.36737e-138
LINC00936	179.921	5.56351	0.220844	25.192	4.89902e-140	3.2267e-138
YPEL2	345.102	3.04782	0.120983	25.1921	4.88578e-140	3.2267e-138
DDX3X	15302.9	1.35709	0.0539673	25.1465	1.54442e-139	1.01429e-137
TWSG1	844.403	2.22035	0.0883318	25.1365	1.98413e-139	1.29932e-137
BRI3BP	7356.53	-1.21279	0.0483035	-25.1077	4.09541e-139	2.67422e-137
DUSP6	2289.62	1.20951	0.0482138	25.0863	7.01514e-139	4.56766e-137
URB2	1291.37	-1.59953	0.0638931	-25.0344	2.58254e-138	1.67674e-136
NCOA5	1819.35	-1.38945	0.0555169	-25.0275	3.06775e-138	1.98611e-136
RFX2	909.629	2.51264	0.100598	24.9772	1.0822e-137	6.98649e-136
CWC25	1671.07	1.20882	0.0484125	24.9692	1.32086e-137	8.50314e-136
ABHD5	490.993	2.32346	0.0931215	24.9509	2.08868e-137	1.34082e-135
SMEK1	3851.56	1.30894	0.052474	24.9445	2.45234e-137	1.56984e-135
TARS	10233.4	1.30137	0.0521816	24.9393	2.7929e-137	1.78284e-135
FBXL20	859.806	1.9427	0.0780095	24.9033	6.8503e-137	4.36065e-135
TRIB3	3567.99	2.24008	0.0900242	24.8831	1.13462e-136	7.20249e-135
CTD-3092A11.2	471.097	2.37655	0.0956301	24.8515	2.49013e-136	1.57632e-134
TNFRSF12A	245.252	2.83937	0.114353	24.8298	4.27574e-136	2.69917e-134
IL10RA	468.184	2.06779	0.0832863	24.8275	4.53085e-136	2.85231e-134
WDR3	2622.43	-1.52371	0.0613865	-24.8215	5.25345e-136	3.29809e-134
SRGAP2B	460.626	2.43413	0.0981891	24.7902	1.1432e-135	7.15722e-134
VMP1	3225.65	1.48308	0.0599576	24.7355	4.44447e-135	2.77493e-133
NLRP1	881.53	1.82178	0.0737212	24.7118	7.98811e-135	4.9738e-133
FAM32A	4957.22	-0.975693	0.0395227	-24.6869	1.47868e-134	9.18192e-133
RNF11	1617.97	1.53682	0.0623535	24.647	3.96775e-134	2.45709e-132
RNF19A	2224.67	1.55695	0.063264	24.6103	9.78909e-134	6.04562e-132
PBX3	3776.21	1.39711	0.0569635	24.5263	7.73659e-133	4.76511e-131
RANBP9	4168.58	1.67976	0.0685729	24.496	1.62764e-132	9.99792e-131
CHMP1B	1230.52	1.42545	0.0582608	24.4667	3.34271e-132	2.04777e-130
PANX1	652.457	1.84185	0.0754082	24.4251	9.25687e-132	5.65562e-130
GADD45A	271.576	2.8418	0.116352	24.4241	9.48571e-132	5.77994e-130
GLUL	9338.28	-1.08359	0.0444159	-24.3965	1.86174e-131	1.13139e-129
FAM98A	1801.74	-1.53222	0.0628613	-24.3746	3.1833e-131	1.92937e-129
ACTL6A	2273.45	-1.4304	0.0588299	-24.3142	1.38803e-130	8.39043e-129
MKLN1-AS1	162.705	5.06472	0.20841	24.3017	1.88284e-130	1.13514e-128
TUBB3	184.148	5.13477	0.212025	24.2178	1.44562e-129	8.69241e-128
RGS16	682.349	1.64578	0.0679811	24.2095	1.76891e-129	1.06083e-127
RPP25	1530.1	-1.70327	0.0704039	-24.1929	2.64235e-129	1.58049e-127
SMOX	1424.29	2.24068	0.0926657	24.1803	3.58715e-129	2.13999e-127
CELF1	3555.49	1.49539	0.061875	24.1679	4.84663e-129	2.88381e-127
MAP1A	337.2	3.05805	0.127061	24.0675	5.47141e-128	3.24708e-126
PTPN14	708.954	1.71921	0.0714767	24.0527	7.82129e-128	4.62959e-126
REV3L	1782.45	1.57343	0.0654455	24.0418	1.01774e-127	6.00863e-126
MRPL17	1362.55	-1.56386	0.0650497	-24.041	1.03762e-127	6.11016e-126
SLC20A1	3577.09	1.36155	0.0566931	24.0161	1.88865e-127	1.10929e-125
IRAK2	137.551	4.83065	0.20148	23.9758	4.97043e-127	2.91185e-125
CHP1	3643.08	1.25938	0.0525766	23.9533	8.53879e-127	4.9895e-125
SMURF1	847.155	1.5324	0.0640155	23.938	1.23301e-126	7.18647e-125
LPIN2	1448.6	1.35486	0.0566184	23.9297	1.50274e-126	8.73623e-125
POGK	2071.82	-1.32015	0.0552064	-23.9129	2.24708e-126	1.30302e-124
HN1L	2090.03	-1.45849	0.0610719	-23.8816	4.75895e-126	2.75258e-124
HIST1H2BK	427.689	2.23819	0.0937603	23.8714	6.07801e-126	3.50663e-124
ZCCHC6	800.959	1.80214	0.0755817	23.8436	1.18065e-125	6.7944e-124
CACNA2D4	4695.85	1.10022	0.0461913	23.8188	2.13149e-125	1.22354e-123
PRMT6	764.995	-2.05695	0.0863995	-23.8075	2.79343e-125	1.59948e-123
UBIAD1	1290.97	-1.49261	0.0626961	-23.8071	2.82151e-125	1.61152e-123
ADIPOR2	6485.41	1.09963	0.0462558	23.7729	6.37522e-125	3.63212e-123
HMOX1	276.1	2.56005	0.107771	23.7545	9.86381e-125	5.60564e-123
SLC25A25	567.517	2.59563	0.109303	23.747	1.1794e-124	6.68588e-123
ST13	6497.27	0.952789	0.0401369	23.7385	1.44456e-124	8.16878e-123
SPRY2	651.028	1.75152	0.0738154	23.7284	1.83689e-124	1.03616e-122
LUC7L	1013.99	1.3596	0.0574043	23.6847	5.18448e-124	2.91726e-122
SNHG8	2165.82	1.23854	0.0522964	23.6831	5.38655e-124	3.0235e-122
CYTIP	674.746	2.01361	0.0850407	23.6781	6.05801e-124	3.39204e-122
MCM6	8686.92	-1.14645	0.0484284	-23.6731	6.82297e-124	3.811e-122
TRIM14	1613.42	-1.32673	0.0561269	-23.6381	1.56524e-123	8.72131e-122
RLF	1410.54	1.60215	0.0678029	23.6295	1.917e-123	1.06553e-121
UCK2	3460.57	-1.0754	0.0455316	-23.6188	2.46786e-123	1.36837e-121
FAM217B	1091.98	-1.66253	0.0704989	-23.5823	5.854e-123	3.23803e-121
ADM2	798.498	3.59699	0.152547	23.5795	6.25892e-123	3.45362e-121
SFXN1	1877.4	-1.24691	0.052901	-23.5706	7.72569e-123	4.25267e-121
MB21D2	218.918	3.05347	0.129576	23.5651	8.78934e-123	4.82651e-121
MBNL1	28147.6	1.39715	0.0593057	23.5584	1.02987e-122	5.64178e-121
SUPT16H	9863.58	-1.25686	0.0534347	-23.5214	2.46194e-122	1.34545e-120
IVNS1ABP	1997.3	1.46227	0.0621996	23.5093	3.2767e-122	1.78643e-120
RPS14	30465.5	0.696567	0.0296465	23.4958	4.50427e-122	2.44983e-120
HUWE1	11579.2	1.003	0.0426911	23.4943	4.66986e-122	2.53385e-120
GABARAPL1	237.453	2.69434	0.114713	23.4876	5.45527e-122	2.95297e-120
SNRNP40	2245.92	-1.28989	0.0550339	-23.4381	1.74849e-121	9.44228e-120
hsa-mir-6723	15387.7	1.1834	0.0505274	23.4209	2.6147e-121	1.40866e-119
TNFRSF1B	1981.16	-1.56353	0.0669359	-23.3586	1.12745e-120	6.05979e-119
GFPT1	1710.6	1.42668	0.0612437	23.2951	4.96554e-120	2.66258e-118
ASF1B	2268.59	-1.21001	0.0519445	-23.2943	5.06859e-120	2.71146e-118
CDKN2B	170.828	3.74359	0.160729	23.2912	5.44025e-120	2.90346e-118
CHAMP1	1798.8	-1.76892	0.0761758	-23.2215	2.76192e-119	1.4706e-117
FZD7	239.312	3.12074	0.134561	23.1919	5.49218e-119	2.91751e-117
CALR	23041.6	-0.661902	0.0285908	-23.1509	1.42419e-118	7.54785e-117
PSME3	6236.75	-0.996742	0.0430975	-23.1276	2.44283e-118	1.29164e-116
CDKN1A	967.674	1.84923	0.079968	23.1246	2.61796e-118	1.38103e-116
SLC29A1	2187.89	-1.12865	0.0488697	-23.0951	5.18195e-118	2.72728e-116
POLR1B	2254.2	-1.47896	0.0640582	-23.0878	6.14391e-118	3.21961e-116
SSFA2	4591.68	1.16053	0.0502661	23.0878	6.14564e-118	3.21961e-116
TVP23B	755.21	1.5658	0.0678439	23.0795	7.44117e-118	3.88937e-116
TRIM35	1442.56	-1.36761	0.0594497	-23.0044	4.20763e-117	2.19422e-115
ANKRD10-IT1	201.636	3.14094	0.136658	22.984	6.73557e-117	3.5045e-115
RPL13A	76086.1	1.00422	0.0437074	22.976	8.10505e-117	4.20743e-115
CCL2	708.778	1.83109	0.0796981	22.9753	8.23852e-117	4.26699e-115
MAP3K8	226.446	2.90218	0.126414	22.9577	1.23404e-116	6.37697e-115
CDKN1B	4287.01	1.00565	0.0438489	22.9344	2.10991e-116	1.08785e-114
APOL4	571.02	-1.9515	0.085276	-22.8846	6.61916e-116	3.40506e-114
NDEL1	1234.46	1.2933	0.0565163	22.8836	6.77068e-116	3.47516e-114
ZRANB1	1330	1.6495	0.0721745	22.8544	1.32218e-115	6.77106e-114
HTR7	567.047	1.85498	0.0812671	22.8257	2.54928e-115	1.30259e-113
PDCD11	4625.93	-1.0267	0.0450354	-22.7975	4.84996e-115	2.47261e-113
SKIL	1154.64	1.77436	0.0778782	22.7838	6.63185e-115	3.37351e-113
MT-CO1	155106	1.22361	0.0537631	22.7593	1.16143e-114	5.89482e-113
NUDT4	1505.49	1.52771	0.0671654	22.7455	1.58869e-114	8.0455e-113
IL17RA	5574.89	-0.850822	0.0375266	-22.6725	8.37296e-114	4.23085e-112
SNX5	5889.92	1.06454	0.0470126	22.6437	1.60954e-113	8.11499e-112
GPR137B	239.692	2.78981	0.123383	22.611	3.37613e-113	1.69842e-111
UBL4A	1440.75	-1.55567	0.0688221	-22.6042	3.93917e-113	1.9773e-111
IQGAP3	2041.18	1.1813	0.0522972	22.5882	5.66606e-113	2.83788e-111
TAF1D	4559.14	1.15351	0.0511012	22.5731	7.97154e-113	3.98385e-111
SLC2A3	638.115	2.09531	0.0929106	22.5519	1.28513e-112	6.40848e-111
CDCA7	2337.3	-1.32109	0.0586186	-22.537	1.80035e-112	8.95813e-111
SLC3A2	8278.12	1.22369	0.0543345	22.5214	2.56165e-112	1.27184e-110
WHAMMP2	1693.11	1.59234	0.0708088	22.4879	5.45674e-112	2.70334e-110
MT-ND4	131184	1.23311	0.0548844	22.4674	8.65936e-112	4.28065e-110
TAF4B	1104.02	1.31723	0.0586317	22.4661	8.90795e-112	4.39401e-110
ZFAND5	1528.15	1.36042	0.0605795	22.4568	1.09698e-111	5.39937e-110
EDEM1	8628.19	1.23069	0.0548034	22.4565	1.10532e-111	5.42868e-110
MT-CYB	60087.1	1.17522	0.0523384	22.4542	1.16455e-111	5.7073e-110
LAIR1	11272.8	-0.749965	0.0334	-22.4541	1.16774e-111	5.71064e-110
RP6-99M1.2	303.472	2.53801	0.113065	22.4473	1.35884e-111	6.63095e-110
MT-ND4L	16911.3	1.32587	0.0591983	22.3971	4.20276e-111	2.04651e-109
IRS2	345.719	2.29102	0.102299	22.3953	4.37387e-111	2.12529e-109
FRAT1	568.266	2.10466	0.0940725	22.3728	7.25025e-111	3.51544e-109
C10orf2	1662.97	-1.31519	0.0588045	-22.3654	8.54715e-111	4.13548e-109
SLC25A19	842.913	-1.49539	0.0669176	-22.3468	1.29839e-110	6.26885e-109
PNPLA8	845.399	1.52667	0.0683998	22.3198	2.37394e-110	1.14376e-108
SLC5A6	2054.77	-1.04007	0.0466465	-22.2968	3.96601e-110	1.90678e-108
DAG1	1551.46	-1.26732	0.0569453	-22.2551	1.00744e-109	4.8334e-108
NUAK1	218.867	2.67809	0.120354	22.2518	1.08366e-109	5.18815e-108
JMJD1C-AS1	326.879	2.85827	0.128477	22.2473	1.19741e-109	5.72073e-108
RNF103	356.193	2.09706	0.0943268	22.2319	1.68967e-109	8.05562e-108
NFATC1	1342.22	2.433	0.109656	22.1875	4.5349e-109	2.15753e-107
GPCPD1	3944.74	1.44192	0.0650621	22.1623	7.94418e-109	3.77166e-107
PPP1R8	2241.34	-1.16458	0.0526152	-22.134	1.48742e-108	7.04713e-107
PLCB2	4118.66	1.17395	0.053088	22.1134	2.35131e-108	1.1117e-106
COPG1	5749.83	-0.920307	0.0416271	-22.1084	2.62617e-108	1.23909e-106
MALAT1	4316.04	1.79555	0.0813862	22.0621	7.30537e-108	3.43971e-106
RPA1	4094.73	-1.09733	0.0497529	-22.0555	8.45529e-108	3.97294e-106
RPS12	31713.7	0.847327	0.0384612	22.0307	1.46235e-107	6.85711e-106
MT-ATP6	41137.5	1.28359	0.0582701	22.0283	1.54107e-107	7.21139e-106
CNNM4	535.027	1.68979	0.0767484	22.0173	1.96819e-107	9.19119e-106
ELL2	429.325	1.8866	0.0858423	21.9775	4.72744e-107	2.20314e-105
ANKRD12	1731.66	1.43443	0.0652691	21.9772	4.76413e-107	2.21571e-105
KBTBD2	1891.53	1.20741	0.0550397	21.937	1.15232e-106	5.34831e-105
KIAA0930	16081.8	-1.34547	0.0613562	-21.9288	1.37885e-106	6.3867e-105
FBXO32	219.826	3.04886	0.13927	21.8918	3.11229e-106	1.43866e-104
PYGO2	1016.73	-1.50679	0.0688298	-21.8916	3.1242e-106	1.44124e-104
GINS1	1256.55	-1.71087	0.0782629	-21.8605	6.17677e-106	2.84369e-104
PPIL4	1245.13	1.50547	0.0689964	21.8196	1.51164e-105	6.94531e-104
RPS3	69909.6	0.758242	0.0347528	21.8182	1.55949e-105	7.15074e-104
FOXN3	5393.12	1.10652	0.0507494	21.8036	2.14489e-105	9.81522e-104
PPM1B	1689.37	1.32475	0.0607794	21.796	2.53322e-105	1.15691e-103
VPS13B	3076.35	1.08901	0.0500068	21.7772	3.81814e-105	1.74023e-103
CARS	3005.5	0.997053	0.04581	21.765	4.98306e-105	2.26665e-103
RPL10A	37264.5	0.705717	0.0324246	21.7648	4.99767e-105	2.26876e-103
GLUD1P3	152.3	3.35493	0.154155	21.7634	5.16026e-105	2.33791e-103
KLF11	1225.91	1.18296	0.0543866	21.7509	6.7696e-105	3.06096e-103
PREB	5115.26	-1.09586	0.0504291	-21.7306	1.05308e-104	4.75219e-103
ACLY	8283.27	-0.765424	0.0353744	-21.6378	7.9251e-104	3.56927e-102
FZD1	286.104	2.45398	0.113498	21.6215	1.12855e-103	5.07268e-102
KCNQ1OT1	194.357	2.80351	0.129751	21.6069	1.54793e-103	6.93041e-102
TRIM27	3010.12	-0.930986	0.0430873	-21.6069	1.54568e-103	6.93041e-102
SDE2	1486.06	1.42455	0.0660577	21.5652	3.81096e-103	1.7029e-101
NOP16	1315.1	-1.195	0.0554615	-21.5465	5.71258e-103	2.54763e-101
UTRN	1091.4	1.631	0.075726	21.5382	6.83638e-103	3.04286e-101
TMEM233	397.092	1.89931	0.0883115	21.507	1.33967e-102	5.9512e-101
RP5-857K21.11	6254.09	1.12084	0.052171	21.4839	2.2037e-102	9.77045e-101
INTS5	1004.46	-1.90304	0.0885884	-21.4819	2.30085e-102	1.01814e-100
MESDC2	1547.02	-1.39255	0.0649903	-21.4271	7.47325e-102	3.30054e-100
SPEN	7098.17	0.72366	0.0337793	21.4232	8.12719e-102	3.58241e-100
KDM5D	1845.2	1.04893	0.0489893	21.4114	1.04708e-101	4.60652e-100
CCNA2	3885.78	-1.09573	0.0512115	-21.3963	1.44792e-101	6.35774e-100
UBR7	2093.36	-1.3023	0.0609219	-21.3765	2.21098e-101	9.68961e-100
WDR27	1085.89	1.40505	0.0657391	21.3732	2.37323e-101	1.03807e-99
HIST1H2AC	171.352	3.11576	0.14595	21.3482	4.0565e-101	1.77095e-99
CLSPN	1232.24	-1.50963	0.0707624	-21.3339	5.50777e-101	2.39993e-99
APEX2	944.436	-1.50449	0.0705368	-21.3291	6.0975e-101	2.65183e-99
DUSP8P5	130.095	4.03691	0.189274	21.3284	6.19504e-101	2.68912e-99
SIK1	792.907	2.04743	0.0960045	21.3264	6.456e-101	2.79707e-99
INTS6	1437.83	1.34977	0.0633743	21.2984	1.17543e-100	5.0829e-99
TRA2A	2286.11	1.23052	0.0578443	21.2729	2.02312e-100	8.73198e-99
ARL5B	880.781	1.69035	0.0795544	21.2478	3.45639e-100	1.48899e-98
PABPC1L	499.291	1.93878	0.0914063	21.2106	7.62995e-100	3.28073e-98
NOL6	3306.87	-1.21765	0.0575302	-21.1653	1.99325e-99	8.55444e-98
ANXA5	3226.36	1.07331	0.0507149	21.1636	2.06691e-99	8.85392e-98
ZSWIM6	359.057	1.92857	0.0911788	21.1516	2.6695e-99	1.14137e-97
UHRF1BP1L	3009.43	1.53695	0.0727324	21.1316	4.07583e-99	1.7394e-97
SLC22A15	1187.91	1.73988	0.0823754	21.1213	5.06734e-99	2.1585e-97
NDE1	1943.85	0.995528	0.0471352	21.1207	5.13109e-99	2.18158e-97
MIR155HG	1063.16	1.75075	0.0829752	21.0997	8.00105e-99	3.39545e-97
RPLP0	60402.8	0.699254	0.0331478	21.095	8.83935e-99	3.74424e-97
ZC3H11A	4589.96	1.29021	0.0612336	21.0703	1.489e-98	6.29553e-97
COLGALT1	12412.2	-1.15355	0.0547691	-21.062	1.77452e-98	7.48882e-97
ETS2	4707.01	0.739482	0.0351392	21.0444	2.57561e-98	1.08495e-96
IP6K2	1436.25	1.29082	0.0614065	21.021	4.21874e-98	1.77381e-96
RYBP	1266.39	1.47026	0.0700264	20.9958	7.16977e-98	3.00906e-96
LINC00599	1632.64	1.19851	0.0571187	20.9827	9.43557e-98	3.9527e-96
IL4I1	413.3	3.01383	0.143805	20.9577	1.59595e-97	6.67342e-96
STX3	697.565	1.5838	0.0756446	20.9373	2.4474e-97	1.0215e-95
FEM1C	827.036	1.62219	0.0776437	20.8928	6.23174e-97	2.59626e-95
TUFT1	118.66	3.95219	0.189254	20.883	7.64568e-97	3.17951e-95
DUSP8	162.926	6.57828	0.315024	20.8818	7.83142e-97	3.25083e-95
ARPC5	6448	-0.883769	0.0423521	-20.8672	1.0642e-96	4.40946e-95
FBXO33	922.324	1.50842	0.072393	20.8365	2.01889e-96	8.34998e-95
SOCS6	562.863	1.71889	0.0824991	20.8353	2.07202e-96	8.55422e-95
ADPRHL2	853.469	-1.44542	0.0694847	-20.8021	4.14618e-96	1.70863e-94
DUSP4	258.019	2.53849	0.12207	20.7954	4.76693e-96	1.9609e-94
GNB2L1	57682.9	0.65985	0.0317563	20.7786	6.76452e-96	2.7776e-94
MT-CO3	77285.3	1.13149	0.0544602	20.7764	7.07828e-96	2.9012e-94
CDKN2AIP	1406.1	1.36084	0.0655428	20.7626	9.42825e-96	3.85746e-94
DDX23	4801.07	-0.779531	0.0375812	-20.7426	1.43129e-95	5.84546e-94
PALB2	718.86	-1.78758	0.0862121	-20.7347	1.68418e-95	6.86598e-94
PPM1D	854.776	1.62299	0.0783128	20.7245	2.08421e-95	8.48162e-94
ITGAX	788.549	1.50609	0.0726996	20.7167	2.45121e-95	9.95732e-94
ERLIN1	4690.53	-1.21806	0.0588549	-20.6961	3.75928e-95	1.52438e-93
DARS2	1974.48	-1.29171	0.0624416	-20.6867	4.5616e-95	1.84644e-93
TGIF1	1166.1	1.36117	0.0658947	20.6567	8.49149e-95	3.43107e-93
WDR47	601.576	1.63208	0.0790235	20.6531	9.14677e-95	3.68931e-93
OGDH	2496.77	-1.13411	0.0550121	-20.6156	1.98776e-94	8.00336e-93
IL6R	3534.66	-0.896555	0.04351	-20.6057	2.43869e-94	9.80164e-93
PRPF4	2214.94	-1.2807	0.0621996	-20.5901	3.36668e-94	1.35076e-92
SERTAD2	1454.32	1.2828	0.0623111	20.5871	3.58423e-94	1.43552e-92
PIM1	8486.27	-0.670307	0.0325605	-20.5865	3.62754e-94	1.45032e-92
PIP4K2B	2955.02	-1.06159	0.0515914	-20.5769	4.42084e-94	1.76439e-92
NAE1	2731.91	-1.15371	0.0561103	-20.5615	6.0747e-94	2.42022e-92
LRRC8C	8265.69	1.23128	0.0598925	20.5582	6.49673e-94	2.58384e-92
AKIRIN2	1267.8	1.22549	0.0596247	20.5534	7.17153e-94	2.84725e-92
RP11-386I14.4	107.322	5.59295	0.272315	20.5386	9.74269e-94	3.86133e-92
MANF	1582.05	-1.15554	0.0563093	-20.5213	1.39048e-93	5.50133e-92
PI4K2A	550.08	1.50632	0.073442	20.5103	1.74225e-93	6.88114e-92
POU2F1	1367.89	1.24973	0.0609757	20.4956	2.35735e-93	9.29441e-92
C6orf120	2539.15	0.94938	0.0463313	20.4911	2.58482e-93	1.01736e-91
AGPAT4	298.786	2.27291	0.110953	20.4854	2.90356e-93	1.14085e-91
RNF122	445.879	1.68226	0.0821624	20.4748	3.61215e-93	1.41682e-91
FAM60A	4165.46	1.20842	0.0590525	20.4634	4.56131e-93	1.78604e-91
GRB10	2285.35	1.17889	0.0576653	20.4437	6.8288e-93	2.66932e-91
MB21D1	2079.63	1.07222	0.0524562	20.4404	7.32082e-93	2.85675e-91
RP1-244F24.1	229.072	2.36391	0.115682	20.4346	8.23093e-93	3.2064e-91
NAP1L4	3524.2	-0.93027	0.0455564	-20.4202	1.10596e-92	4.30099e-91
RASL11A	142.438	3.09531	0.151604	20.4171	1.17973e-92	4.58005e-91
CNST	774.901	1.48052	0.072582	20.3979	1.74448e-92	6.76104e-91
PAN3	6200.71	1.20207	0.0589524	20.3906	2.0261e-92	7.83918e-91
MSH6	3337.6	-1.06688	0.0523593	-20.376	2.72867e-92	1.05396e-90
CPSF6	5324.12	-0.822617	0.0403949	-20.3644	3.45977e-92	1.33409e-90
PIM3	2764.55	3.34107	0.164068	20.3639	3.49787e-92	1.3465e-90
MAK16	2241.94	-1.24733	0.0612674	-20.3588	3.88329e-92	1.49235e-90
KLF2	615.306	3.64505	0.179126	20.349	4.73504e-92	1.81661e-90
MCM2	7403.35	-1.25596	0.0617384	-20.3433	5.32764e-92	2.04053e-90
ADNP2	2019.69	0.991696	0.0487553	20.3402	5.66485e-92	2.16604e-90
CDC20	3949.18	-0.828238	0.040722	-20.3388	5.83246e-92	2.2264e-90
EI24	3494.15	-1.04307	0.0512863	-20.3381	5.91366e-92	2.25362e-90
TUBE1	773.915	1.69248	0.0832304	20.3349	6.32044e-92	2.40462e-90
DNAJA1	12510.6	0.909704	0.0447371	20.3344	6.37735e-92	2.42223e-90
IL1RAP	8260.42	1.16641	0.0573942	20.3228	8.08961e-92	3.06746e-90
CHML	4082.44	1.43056	0.0704279	20.3125	9.97784e-92	3.77716e-90
RELB	623.3	2.26048	0.11132	20.3063	1.13219e-91	4.27885e-90
POLR1A	3509.88	-0.961679	0.0474012	-20.2881	1.63904e-91	6.18412e-90
TNFAIP8L3	124.271	4.1037	0.202375	20.2777	2.024e-91	7.62397e-90
EVI2B	3339.52	1.56549	0.0772261	20.2715	2.29405e-91	8.62692e-90
MBOAT1	362.765	1.92122	0.0947786	20.2706	2.33946e-91	8.78319e-90
RCC1	3752.97	-0.81294	0.0401394	-20.2529	3.34805e-91	1.25491e-89
HIAT1	2365.24	1.19651	0.0591498	20.2285	5.49196e-91	2.05511e-89
FNIP1	1544.53	1.56255	0.0772578	20.2251	5.88396e-91	2.19819e-89
DNAJA3	2661.16	-0.988226	0.0489092	-20.2053	8.79359e-91	3.27982e-89
SNAPC1	396.954	2.00079	0.0990433	20.2012	9.56203e-91	3.5606e-89
SHISA7	1350.64	-1.15671	0.0572629	-20.2001	9.77813e-91	3.63513e-89
HIST1H2BG	102.891	5.87413	0.290971	20.1881	1.24651e-90	4.62649e-89
MPHOSPH10	1527.51	-1.17512	0.058264	-20.169	1.83371e-90	6.79488e-89
GOLPH3	5028.38	0.935188	0.0464181	20.1471	2.85619e-90	1.05665e-88
RASSF2	5212.22	-1.00707	0.0500489	-20.1217	4.76842e-90	1.76122e-88
MTMR10	1094.28	1.26368	0.0628056	20.1205	4.88046e-90	1.79969e-88
TUBG1	749.98	-1.52798	0.0760217	-20.0992	7.49646e-90	2.75988e-88
TPT1	41003.8	1.0159	0.050567	20.0902	8.98244e-90	3.30163e-88
LETMD1	2267.28	1.18691	0.059087	20.0876	9.47522e-90	3.47715e-88
RPS18	64834.3	0.791927	0.0395262	20.0355	2.70081e-89	9.89531e-88
BACH1	1749.22	1.17345	0.0585692	20.0353	2.70964e-89	9.91172e-88
NCAPD3	3986.19	-0.904773	0.0451985	-20.0178	3.85625e-89	1.40833e-87
POLDIP2	3330.1	-0.973522	0.0487131	-19.9848	7.46867e-89	2.72326e-87
RPL10	41288.9	0.751745	0.0376258	19.9795	8.30644e-89	3.02389e-87
RPS8	38609.1	0.637657	0.0319176	19.9783	8.51524e-89	3.09496e-87
HIVEP1	552.854	1.56127	0.0783163	19.9355	2.0038e-88	7.27143e-87
GORASP2	3599.06	-0.857188	0.0430439	-19.9143	3.06016e-88	1.10871e-86
PGRMC2	1262.52	-1.3638	0.0685458	-19.8962	4.38899e-88	1.58763e-86
MRPS23	1535.94	-1.19608	0.0601323	-19.8908	4.89298e-88	1.76713e-86
CHAF1A	2631.04	-1.0639	0.0535662	-19.8613	8.79559e-88	3.17156e-86
SERINC1	3949.94	1.14529	0.0576661	19.8608	8.8874e-88	3.1996e-86
TP53RK	2436.07	1.08803	0.0547975	19.8555	9.87302e-88	3.54884e-86
GIPR	950.974	1.4198	0.0715251	19.8504	1.09409e-87	3.92649e-86
GLOD4	1657.43	-1.25412	0.0631806	-19.8497	1.10761e-87	3.96875e-86
SIGLEC12	1633.96	-1.14647	0.0577674	-19.8464	1.18357e-87	4.23427e-86
UBXN7	1966.45	1.3901	0.0700919	19.8325	1.56007e-87	5.57247e-86
TSN	3836.69	-1.04016	0.0524626	-19.8267	1.75268e-87	6.25067e-86
TRUB2	1051.74	-1.22149	0.0616417	-19.816	2.1675e-87	7.71799e-86
IRF1	1215.51	1.0851	0.0547749	19.8102	2.42999e-87	8.63916e-86
CBX2	475.522	-2.18339	0.110272	-19.8	2.97856e-87	1.0573e-85
PHF21A	959.362	1.52606	0.0770881	19.7963	3.20279e-87	1.13512e-85
CLK3	2012.57	1.23196	0.0622507	19.7902	3.61265e-87	1.2784e-85
HSPA1B	2195.23	1.58925	0.080462	19.7516	7.77039e-87	2.74542e-85
ATF5	9169.47	1.16788	0.059204	19.7263	1.28192e-86	4.52225e-85
FXR1	6051.81	1.03918	0.0527066	19.7162	1.56446e-86	5.51043e-85
TNFSF14	419.777	1.72879	0.0878167	19.6863	2.82498e-86	9.93495e-85
CCL3	175.626	7.00359	0.356104	19.6673	4.11396e-86	1.44458e-84
LRRC8B	833.324	1.61734	0.0822552	19.6625	4.51715e-86	1.58371e-84
THRA	895.766	-1.51684	0.0771454	-19.6621	4.55816e-86	1.59564e-84
AHSA2	1039	1.30102	0.066255	19.6365	7.53552e-86	2.63385e-84
SYK	3348.63	-0.837852	0.0426689	-19.6361	7.59977e-86	2.65224e-84
LONRF3	306.232	1.97281	0.100534	19.6234	9.76111e-86	3.40131e-84
DCTPP1	1272.65	-1.17869	0.06007	-19.6219	1.00494e-85	3.49643e-84
RAD51	1066.15	-1.48928	0.0759476	-19.6093	1.28776e-85	4.47359e-84
TTC39B	502.293	2.21153	0.112843	19.5982	1.60069e-85	5.55223e-84
RPL11	37139.7	0.911349	0.0465615	19.573	2.62598e-85	9.09474e-84
TBC1D17	509.846	2.03316	0.103883	19.5716	2.70004e-85	9.33707e-84
IL18	604.2	1.69031	0.0863963	19.5646	3.10091e-85	1.07071e-83
TOB2	1421.49	1.0503	0.0537317	19.5472	4.36163e-85	1.50374e-83
PWP1	2086.65	-1.03663	0.0530779	-19.5303	6.06601e-85	2.08819e-83
PUM1	4072.85	1.11742	0.0572494	19.5184	7.65479e-85	2.63115e-83
ZBTB2	1006.91	1.37108	0.0702513	19.5168	7.89731e-85	2.71042e-83
XAF1	2283.9	1.29016	0.0661604	19.5005	1.08622e-84	3.72239e-83
FAM134A	2459	-0.988892	0.0507786	-19.4746	1.80395e-84	6.1727e-83
VAMP2	744.301	1.54647	0.0794825	19.4567	2.55642e-84	8.73439e-83
RP11-343N15.5	403.883	2.17136	0.111625	19.4522	2.78964e-84	9.51694e-83
TFDP1	6724.11	-0.826785	0.0425049	-19.4515	2.82877e-84	9.636e-83
MPEG1	2642.06	-1.13851	0.0585468	-19.4462	3.13824e-84	1.06742e-82
RP11-37B2.1	140.808	3.21688	0.1655	19.4373	3.73426e-84	1.26826e-82
SNHG3	2431.86	1.13694	0.0585092	19.4318	4.15775e-84	1.40998e-82
RGS1	108.317	6.15841	0.317059	19.4235	4.8811e-84	1.65283e-82
HMOX2	1049.37	-1.26936	0.0653623	-19.4204	5.18519e-84	1.75319e-82
ZXDC	973.006	1.21559	0.0626084	19.4158	5.67389e-84	1.91559e-82
TRAF6	724.84	1.41568	0.0730389	19.3826	1.08323e-83	3.65175e-82
WAC	5631.29	1.01452	0.0524841	19.3301	3.00025e-83	1.00993e-81
NR1D2	647.694	1.76759	0.0914912	19.3198	3.65877e-83	1.22979e-81
SLC36A1	1820.85	-1.0235	0.0530795	-19.2823	7.55833e-83	2.53677e-81
ASNSD1	1827.67	-1.18116	0.0612754	-19.2762	8.50372e-83	2.84987e-81
VKORC1L1	2349.2	-1.03833	0.0539227	-19.256	1.2583e-82	4.21076e-81
MTFR2	912.154	-1.46698	0.0762221	-19.2462	1.51981e-82	5.07844e-81
CISH	1477.72	-1.351	0.0703016	-19.2172	2.65508e-82	8.85895e-81
CCNL2	3480.63	1.06107	0.0552229	19.2143	2.81027e-82	9.36306e-81
FBXO5	1242.34	-1.31507	0.0684526	-19.2114	2.97152e-82	9.88582e-81
CBX6	5682.49	-1.33405	0.0694549	-19.2074	3.20663e-82	1.06525e-80
SCAMP2	3069.56	-0.929392	0.0483941	-19.2047	3.38246e-82	1.12202e-80
CDC42EP4	367.895	1.79163	0.093343	19.194	4.15122e-82	1.37503e-80
TTI1	1179.28	-1.23705	0.0644558	-19.1923	4.29466e-82	1.42048e-80
PAQR3	750.54	1.74168	0.0907743	19.1869	4.75877e-82	1.57171e-80
NLN	1890.41	-1.1027	0.057514	-19.1727	6.25155e-82	2.06175e-80
NHP2L1	4426.46	-0.739023	0.0386065	-19.1425	1.11862e-81	3.68386e-80
EPB41L4A-AS1	750.558	1.46209	0.0764172	19.1331	1.33951e-81	4.40491e-80
KAT6B	1399.51	1.19404	0.0624281	19.1267	1.51435e-81	4.97269e-80
DCAF7	6964.03	-0.736905	0.0385642	-19.1085	2.14457e-81	7.03204e-80
PARP6	1244.36	1.11169	0.0581862	19.1058	2.25848e-81	7.3949e-80
MED13L	9381.7	1.03916	0.0544202	19.0952	2.7702e-81	9.05741e-80
KBTBD11	3643.22	-0.925785	0.0485171	-19.0816	3.58837e-81	1.17157e-79
PHF10	8225.9	1.03378	0.0541781	19.0811	3.62624e-81	1.18224e-79
HLA-E	10164.2	1.06596	0.0558851	19.0741	4.14577e-81	1.34969e-79
CAT	10552.6	-0.865212	0.0453923	-19.0608	5.34968e-81	1.73914e-79
FAM78A	3938.84	-1.49766	0.0785909	-19.0564	5.81497e-81	1.88771e-79
EXOSC3	815.829	-1.34743	0.0707235	-19.052	6.32241e-81	2.04952e-79
STARD4	413.075	1.70687	0.0896383	19.0418	7.68755e-81	2.48852e-79
TRIM38	1070.71	1.36493	0.071687	19.0401	7.93698e-81	2.56561e-79
ZFP36L2	9690.39	-0.670227	0.0352157	-19.032	9.26183e-81	2.98963e-79
SRSF1	11605.8	-0.646138	0.0339564	-19.0285	9.9075e-81	3.19352e-79
HPDL	683.531	-2.1219	0.11154	-19.0236	1.08673e-80	3.49795e-79
KDM6B	1980.75	2.20116	0.11572	19.0215	1.13245e-80	3.63997e-79
SRSF5	9992.61	0.939721	0.0495385	18.9695	3.0476e-80	9.78194e-79
FOXM1	2158.86	-0.983585	0.0518515	-18.9693	3.06198e-80	9.81428e-79
NFE2L2	5289.33	1.22848	0.064775	18.9653	3.2996e-80	1.0561e-78
CCL4	331.832	9.28691	0.489726	18.9635	3.41776e-80	1.09239e-78
WDR76	1493.07	-1.25523	0.0662076	-18.9589	3.7255e-80	1.18908e-78
ANKLE1	1944.2	-0.95207	0.0502686	-18.9397	5.37517e-80	1.71321e-78
ERO1LB	95.6624	3.75042	0.198045	18.9372	5.62784e-80	1.79124e-78
GPATCH4	2164.04	-1.07218	0.0566281	-18.9337	6.01787e-80	1.91271e-78
NXT1	758.279	-1.47507	0.0779665	-18.9193	7.9144e-80	2.5085e-78
EEF1A1	194479	0.950342	0.0502735	18.9034	1.06843e-79	3.38173e-78
CHST10	486.449	-1.72418	0.0913097	-18.8827	1.58138e-79	4.99834e-78
CTGF	139.857	6.4473	0.341677	18.8696	2.03012e-79	6.4078e-78
RND1	104.76	3.4599	0.183535	18.8514	2.85967e-79	9.0137e-78
ATG16L2	2010.6	1.41739	0.0751897	18.8508	2.89426e-79	9.11012e-78
UBA52	29764.2	0.641467	0.0340484	18.8399	3.55647e-79	1.11791e-77
MEX3C	2128.99	1.17076	0.0621465	18.8388	3.63297e-79	1.14038e-77
ISG20L2	2158.08	-1.29416	0.0687598	-18.8214	5.04074e-79	1.5801e-77
RPL26	3016.94	0.930301	0.0494755	18.8033	7.09905e-79	2.22226e-77
FTSJ3	2267.36	-1.01791	0.0541663	-18.7923	8.73474e-79	2.73053e-77
MARK3	2694.59	1.06731	0.0568176	18.7849	1.0036e-78	3.13303e-77
RP11-61J19.4	95.6676	6.12332	0.326495	18.7547	1.77255e-78	5.52595e-77
EXTL3	1223.87	-1.24129	0.0662329	-18.7413	2.27874e-78	7.0943e-77
CTC-349C3.1	338.637	1.84322	0.0983744	18.7368	2.48245e-78	7.71794e-77
P2RX7	403.3	2.27606	0.121514	18.7309	2.77392e-78	8.61236e-77
CYLD	2020.14	1.06755	0.0569942	18.7308	2.77773e-78	8.61248e-77
PRRC1	2542.91	-1.2524	0.0668915	-18.7228	3.22782e-78	9.9944e-77
FAM193B	870.922	1.85656	0.0992913	18.6981	5.13008e-78	1.58629e-76
MCM3	6565.86	-0.949074	0.0507899	-18.6863	6.40542e-78	1.97795e-76
ZBTB1	1527.2	1.34662	0.0720672	18.6856	6.48655e-78	2.0003e-76
CREBBP	2216.69	1.12378	0.0601578	18.6806	7.12773e-78	2.19505e-76
FAM101B	6751.71	-0.772524	0.0413769	-18.6704	8.61935e-78	2.65083e-76
SQSTM1	3141.54	1.59793	0.0857117	18.6431	1.43697e-77	4.41336e-76
MTERFD1	959.205	-1.25097	0.0671343	-18.6339	1.70735e-77	5.23673e-76
TP53BP1	1430.24	1.21063	0.0650239	18.6181	2.28995e-77	7.01421e-76
MT2A	2820.13	2.21292	0.119005	18.5952	3.51682e-77	1.07577e-75
C9orf78	1907.03	-0.993861	0.0534537	-18.5929	3.66557e-77	1.11977e-75
COA4	1839.79	-1.08201	0.0582083	-18.5887	3.96937e-77	1.21095e-75
ZWINT	3471.42	-0.960563	0.0517128	-18.575	5.12335e-77	1.56091e-75
MRPS16	1884	-0.978492	0.0526888	-18.5712	5.49997e-77	1.67341e-75
ZNF326	1663.03	1.05397	0.0567544	18.5706	5.55395e-77	1.68759e-75
DBNDD1	140.476	3.2365	0.174295	18.5691	5.71294e-77	1.73358e-75
RBM15	1477.38	0.974551	0.0524972	18.5639	6.29948e-77	1.90903e-75
RPGR	431.277	1.92803	0.103929	18.5514	7.93872e-77	2.4026e-75
SECISBP2L	1181.68	1.38519	0.0747036	18.5426	9.36709e-77	2.83112e-75
PATZ1	1620.29	-1.12472	0.0606602	-18.5412	9.59751e-77	2.89692e-75
RUVBL1	2657.73	-0.811019	0.0437606	-18.5331	1.11693e-76	3.3669e-75
AKAP9	1409.61	1.38919	0.074971	18.5296	1.1909e-76	3.58512e-75
NFE2L3	614.477	1.51858	0.0821051	18.4956	2.24222e-76	6.74114e-75
GNA13	4045.16	1.20094	0.0649745	18.4833	2.81658e-76	8.4568e-75
POP1	1180.28	-1.22686	0.0664175	-18.472	3.47109e-76	1.04083e-74
WDR5	3295.42	-0.906541	0.0490951	-18.465	3.95099e-76	1.18317e-74
TOB1	700.094	1.46027	0.0791314	18.4537	4.8661e-76	1.4553e-74
RARS	2637.48	-1.0726	0.0581484	-18.4459	5.62897e-76	1.68124e-74
FOXJ2	900.977	1.14374	0.0620595	18.4297	7.59578e-76	2.26571e-74
MAX	2024.77	-0.944552	0.0513106	-18.4085	1.12248e-75	3.34381e-74
SCO1	825.61	-1.28713	0.0699249	-18.4074	1.14674e-75	3.41163e-74
SNORD3A	98.2001	5.56955	0.302577	18.4071	1.15327e-75	3.42659e-74
CSE1L	6452.13	-1.08223	0.0588346	-18.3945	1.45442e-75	4.31571e-74
SLA	1224.92	-1.28691	0.0700061	-18.3828	1.80405e-75	5.34624e-74
NR3C1	4876.23	1.20244	0.065426	18.3787	1.94699e-75	5.76234e-74
MTMR4	974.589	-1.43725	0.0782782	-18.3608	2.70586e-75	7.99791e-74
HNRNPL	5603.06	0.743949	0.0405292	18.3559	2.9615e-75	8.74219e-74
RP11-274B21.1	269.991	2.01353	0.109694	18.3558	2.96616e-75	8.74461e-74
MLEC	10229.5	-0.913907	0.0497896	-18.3554	2.99024e-75	8.80422e-74
SAE1	8473.69	-0.739743	0.0403678	-18.3251	5.21994e-75	1.53493e-73
ARRDC3	198.367	2.44908	0.133652	18.3243	5.29678e-75	1.55552e-73
UBAP2L	5293.56	-0.844006	0.0460733	-18.3188	5.86415e-75	1.71993e-73
PUS7	1461.09	-1.22764	0.0670321	-18.3142	6.37158e-75	1.86635e-73
NUP188	4554.19	-0.710163	0.0388031	-18.3017	8.02231e-75	2.34686e-73
POLA2	1616.04	-1.01889	0.0556887	-18.2962	8.86726e-75	2.59072e-73
NDUFV3	1262.17	-1.24028	0.0678301	-18.2852	1.08664e-74	3.17073e-73
ELAVL1	3801.57	-0.726517	0.0397681	-18.2688	1.46571e-74	4.27137e-73
ZBTB11	1903.7	1.42375	0.0779566	18.2634	1.61952e-74	4.71357e-73
THUMPD3	1510.01	-1.28264	0.0702508	-18.258	1.78631e-74	5.19238e-73
C17orf76-AS1	17167.7	0.89607	0.0491046	18.2482	2.13929e-74	6.21049e-73
CXCR4	2536.95	-0.991856	0.0543784	-18.2399	2.49017e-74	7.21992e-73
ARIH1	2836.35	1.16408	0.0638368	18.2353	2.70793e-74	7.84131e-73
RPL37	29380.3	0.759579	0.041695	18.2175	3.74965e-74	1.0844e-72
MSH2	2540.62	-1.17356	0.0644346	-18.2132	4.05238e-74	1.17046e-72
PLA2G4A	696.461	1.55962	0.0856388	18.2116	4.17233e-74	1.20358e-72
TRAF1	189.369	2.3762	0.130504	18.2079	4.46949e-74	1.28768e-72
CLDND1	1621.74	1.11072	0.0610638	18.1895	6.25217e-74	1.799e-72
TRIM65	1896.63	-1.20744	0.0664439	-18.1724	8.54371e-74	2.45527e-72
NACC2	672.077	-1.94353	0.106996	-18.1646	9.84989e-74	2.82707e-72
CD86	222.068	2.43233	0.13396	18.157	1.12948e-73	3.2377e-72
HYOU1	9162.17	-0.64323	0.0354393	-18.1502	1.27976e-73	3.66388e-72
PPIL1	1408.83	-1.15558	0.0636683	-18.15	1.28299e-73	3.66851e-72
RAB3D	1665.41	-1.14246	0.0630092	-18.1317	1.79146e-73	5.11598e-72
RPL7L1	8096.83	-1.03625	0.0571807	-18.1223	2.12459e-73	6.05972e-72
POFUT1	3321.79	-0.807745	0.0446231	-18.1015	3.10168e-73	8.83551e-72
GEM	186.22	8.49046	0.469207	18.0953	3.46756e-73	9.86544e-72
DYM	2060.26	0.952402	0.052648	18.09	3.82168e-73	1.08594e-71
DPF1	92.9883	5.43072	0.300563	18.0685	5.64036e-73	1.60072e-71
FAM45A	1378.03	-1.10514	0.0611703	-18.0666	5.84454e-73	1.65661e-71
API5	3003.68	-1.17117	0.0648356	-18.0637	6.15688e-73	1.74297e-71
OPTN	503.644	1.57968	0.0874581	18.0622	6.32735e-73	1.78901e-71
MDC1	2514.4	-0.921485	0.0510303	-18.0576	6.87374e-73	1.94109e-71
HPS6	816.894	-1.72033	0.095292	-18.0532	7.44004e-73	2.0984e-71
CCDC71	429.386	-2.01935	0.111856	-18.0531	7.45738e-73	2.1007e-71
GNAS	16169.4	0.672677	0.0372899	18.0391	9.60638e-73	2.70271e-71
RIC8A	2353.73	-0.907882	0.0503383	-18.0356	1.02357e-72	2.87622e-71
TMEM109	5900.14	-0.919136	0.0509725	-18.032	1.09234e-72	3.06568e-71
PAK1IP1	1041.77	-1.35715	0.0753132	-18.0201	1.35483e-72	3.79768e-71
PLEKHO2	761.22	1.323	0.0734455	18.0133	1.53131e-72	4.28711e-71
MT1F	1215.45	1.08682	0.0603523	18.008	1.68702e-72	4.71723e-71
ARID2	3755.82	1.21704	0.067599	18.0038	1.81782e-72	5.07676e-71
MCTP1	1404.34	1.3836	0.0768647	18.0005	1.93077e-72	5.38561e-71
TTC28	4371.05	0.797232	0.044295	17.9982	2.01099e-72	5.60249e-71
LIF	95.8254	6.62191	0.368136	17.9877	2.43412e-72	6.77303e-71
DLAT	2390.21	-1.06463	0.0592108	-17.9803	2.7795e-72	7.72464e-71
RPS3A	15437	0.818818	0.0455477	17.9771	2.94334e-72	8.17001e-71
TNFRSF10D	937.649	1.13914	0.0633849	17.9718	3.24177e-72	8.98743e-71
ANP32A	10482.4	-0.826593	0.0460063	-17.9669	3.53634e-72	9.79219e-71
UBB	5488.68	0.978752	0.0544962	17.96	4.00796e-72	1.10846e-70
MAD2L1	2944.61	-0.968379	0.0539584	-17.9468	5.08541e-72	1.40474e-70
HSPE1	1064.44	1.12104	0.0625569	17.9204	8.18022e-72	2.25689e-70
RPS27	24045.7	0.907176	0.050639	17.9146	9.07421e-72	2.50051e-70
POLE2	608.448	-1.51236	0.0844434	-17.9097	9.90119e-72	2.7251e-70
SHQ1	1117.62	-1.1728	0.0655212	-17.8995	1.18946e-71	3.26979e-70
DNAJB6	2438.22	1.00925	0.0563889	17.8981	1.22074e-71	3.35173e-70
TSR1	3141.01	-0.814013	0.0455488	-17.8712	1.97583e-71	5.41844e-70
KIAA1430	1853.52	-1.18327	0.0662413	-17.863	2.29159e-71	6.2768e-70
CSTF1	1025.74	-1.25755	0.0704988	-17.8378	3.59488e-71	9.83478e-70
DDX28	674.607	-1.45121	0.0814197	-17.8239	4.61472e-71	1.26097e-69
RBM4	239.164	1.98084	0.111228	17.8089	6.0335e-71	1.64668e-69
CD3EAP	338.604	-1.83335	0.102976	-17.8037	6.61353e-71	1.80097e-69
LONRF1	1214.6	1.19435	0.0670846	17.8037	6.61464e-71	1.80097e-69
L3MBTL2	1120.88	-1.19099	0.0669208	-17.797	7.45702e-71	2.0279e-69
CDCA8	3155.51	-0.767252	0.0431203	-17.7933	7.96607e-71	2.16375e-69
PHF1	812.035	1.21564	0.0683518	17.7851	9.21939e-71	2.5012e-69
ITPR1	4631.9	0.858119	0.0482526	17.7839	9.42126e-71	2.55293e-69
RPL27	19542.9	0.659419	0.0370868	17.7804	1.00225e-70	2.71261e-69
ZNF432	440.132	1.86208	0.104797	17.7685	1.24037e-70	3.35311e-69
TNFAIP8	231.398	2.04277	0.115027	17.7591	1.46584e-70	3.95795e-69
CSPP1	1408.72	1.30232	0.073344	17.7563	1.53995e-70	4.15312e-69
NAT10	4378.62	-0.843871	0.0475306	-17.7543	1.5974e-70	4.30298e-69
RCSD1	5551.08	-0.653037	0.0368276	-17.7323	2.36287e-70	6.35743e-69
PHF15	1250.4	-1.42209	0.0802478	-17.7212	2.87668e-70	7.73075e-69
ADD1	4526.22	-0.684638	0.0386401	-17.7183	3.0291e-70	8.13077e-69
RPL4	80539	0.708793	0.0400198	17.7111	3.44518e-70	9.23672e-69
AGPAT5	3940.02	-1.10652	0.0625089	-17.7017	4.0673e-70	1.08919e-68
SYF2	1856.76	0.94274	0.0532798	17.6941	4.65237e-70	1.2444e-68
PPP1CB	5121.97	1.14222	0.064555	17.6937	4.68664e-70	1.2521e-68
ARL4C	682.868	1.49213	0.0844876	17.6609	8.39325e-70	2.23974e-68
PROSC	2573.53	-0.953814	0.0540167	-17.6578	8.87051e-70	2.36433e-68
HERC1	3550.72	0.992796	0.056226	17.6573	8.94922e-70	2.38252e-68
CCNF	1689.43	-1.07551	0.0609166	-17.6554	9.24811e-70	2.45922e-68
CTH	269.462	2.33111	0.132184	17.6354	1.3177e-69	3.49989e-68
EIF5	12629	1.02229	0.0579887	17.6292	1.47099e-69	3.90249e-68
MTRNR2L1	136.702	3.14999	0.178744	17.623	1.64106e-69	4.3486e-68
SRPRB	3402.07	-0.958858	0.0544273	-17.6172	1.81695e-69	4.80911e-68
CHAC1	228.434	4.74104	0.269262	17.6076	2.15499e-69	5.69722e-68
PPP2CB	1600.33	0.997921	0.0566761	17.6075	2.15949e-69	5.70252e-68
SRSF8	673.956	-1.51171	0.0859899	-17.5801	3.49746e-69	9.22496e-68
RPL31	23105.9	0.859708	0.0489044	17.5794	3.54481e-69	9.33903e-68
JUND	8678.24	1.93816	0.11031	17.5702	4.16563e-69	1.0962e-67
ARL1	1512.57	-1.18034	0.0672104	-17.5619	4.82746e-69	1.26889e-67
UTY	899.402	1.32504	0.0755658	17.5349	7.76011e-69	2.03739e-67
SMIM12	928.299	-1.14453	0.0652846	-17.5314	8.24876e-69	2.16319e-67
ZBTB9	496.096	-1.6303	0.0930938	-17.5124	1.15214e-68	3.01795e-67
PABPC1	109997	0.701271	0.0400661	17.5029	1.36232e-68	3.5644e-67
PTPRC	5557.24	1.07775	0.0615781	17.5021	1.37974e-68	3.60583e-67
RPL32	30293.8	0.733853	0.0419312	17.5014	1.39875e-68	3.65132e-67
CCNE2	377.7	-1.9875	0.113596	-17.4963	1.52874e-68	3.98609e-67
TMEM203	693.069	-1.51328	0.0864919	-17.4962	1.53194e-68	3.98987e-67
PAF1	2479.31	0.733977	0.041954	17.4948	1.56964e-68	4.08339e-67
BCOR	4026.62	-0.683679	0.0390975	-17.4865	1.81566e-68	4.71803e-67
HERC2P2	1092.86	1.10275	0.0630685	17.485	1.86389e-68	4.83785e-67
BRCA1	2785.36	-1.09987	0.0629413	-17.4745	2.24074e-68	5.80934e-67
TESK2	271.954	2.0017	0.114558	17.4733	2.28793e-68	5.92495e-67
UBE2FP1	82.9284	4.64581	0.265936	17.4697	2.43983e-68	6.31117e-67
ALDH18A1	2646.78	-0.791335	0.0453208	-17.4608	2.85117e-68	7.36681e-67
CDK5RAP3	2817.32	0.796664	0.0456326	17.4582	2.98083e-68	7.6931e-67
C22orf29	797.959	-1.16753	0.066883	-17.4563	3.08064e-68	7.94172e-67
MARS2	881.206	-1.3107	0.0751208	-17.4479	3.57262e-68	9.1996e-67
ATP2A2	12535.4	0.729338	0.0418109	17.4437	3.84315e-68	9.88505e-67
CLN8	860.539	1.05207	0.0603246	17.4401	4.09518e-68	1.05214e-66
ZBTB40	1578.63	0.848799	0.0487352	17.4165	6.18167e-68	1.58642e-66
SLC6A6	1714.69	0.831502	0.047765	17.4082	7.15333e-68	1.83371e-66
PLAC8	3233.38	-0.982591	0.0564561	-17.4045	7.6241e-68	1.9522e-66
SCML1	254.161	2.06388	0.118594	17.4028	7.85036e-68	2.00788e-66
UTP15	837.943	-1.34402	0.0772396	-17.4007	8.14666e-68	2.08133e-66
EEF1B2	18766.8	0.658975	0.0379001	17.3871	1.0326e-67	2.63515e-66
SBDS	1616.07	1.16732	0.0671394	17.3865	1.04461e-67	2.66283e-66
TOE1	957.763	-1.17542	0.067608	-17.3859	1.0561e-67	2.6891e-66
LPAR1	458.543	1.47369	0.0848711	17.3639	1.54851e-67	3.93849e-66
RPS13	22070	0.757553	0.043639	17.3595	1.67128e-67	4.24602e-66
AAR2	1605.63	-0.988683	0.0569555	-17.3589	1.69019e-67	4.28929e-66
MRPL16	1340.27	-1.06345	0.0612665	-17.3578	1.72294e-67	4.36752e-66
WDR91	1069.13	1.00987	0.0582715	17.3304	2.77277e-67	7.02097e-66
UBE2C	3232.97	-0.773475	0.0446329	-17.3297	2.80701e-67	7.09977e-66
AKIRIN1	3562.72	0.995607	0.0574601	17.3269	2.94664e-67	7.44468e-66
DTL	1880.25	-1.18423	0.0683505	-17.3258	3.00653e-67	7.58757e-66
RPL35A	20739.5	0.909089	0.052512	17.312	3.81848e-67	9.62603e-66
SUV39H1	921.747	-1.21368	0.0701987	-17.2892	5.67653e-67	1.42942e-65
CWC15	1471.39	-1.10811	0.0640991	-17.2874	5.85647e-67	1.4731e-65
YWHAH	4744.2	-0.865237	0.050068	-17.2812	6.51423e-67	1.63675e-65
RPS15A	2874.47	0.950866	0.05503	17.2791	6.76368e-67	1.69755e-65
C10orf118	477.023	1.8173	0.1052	17.2748	7.28865e-67	1.8273e-65
FBXO45	2249.52	-0.991328	0.0574146	-17.2661	8.46171e-67	2.11905e-65
STMN1	9900.58	-0.886961	0.0513791	-17.2631	8.92645e-67	2.23298e-65
RBL1	2242.61	-1.13017	0.0655069	-17.2527	1.0681e-66	2.66896e-65
ENDOD1	646.999	-1.41315	0.0819271	-17.2489	1.14145e-66	2.84913e-65
TMPO	9589.51	-1.13527	0.0658428	-17.2422	1.28135e-66	3.19481e-65
RRP36	1074.07	-1.26667	0.0734942	-17.235	1.45018e-66	3.61181e-65
RPL7A	53816.3	0.640691	0.0371828	17.2308	1.55938e-66	3.87956e-65
DHX33	1662.94	-0.928204	0.0538978	-17.2216	1.82948e-66	4.54657e-65
BRCC3	1353.51	-1.17492	0.0682271	-17.2207	1.85684e-66	4.60953e-65
HIST1H2AE	71.4082	4.55229	0.264387	17.2183	1.93728e-66	4.804e-65
NR4A3	94.0572	6.66428	0.387097	17.216	2.01354e-66	4.98767e-65
ANKLE2	3161.96	0.7531	0.0437549	17.2118	2.16615e-66	5.35987e-65
UTP3	1644.36	-1.0398	0.0604155	-17.2108	2.20242e-66	5.44371e-65
CDC6	2128.75	-0.979372	0.0569376	-17.2008	2.6188e-66	6.46587e-65
RABGAP1L	1650.13	1.07041	0.0622426	17.1974	2.77776e-66	6.85092e-65
SGMS1	190.639	2.17308	0.126624	17.1618	5.13274e-66	1.26454e-64
SELRC1	985.46	-1.33043	0.0775532	-17.1551	5.75569e-66	1.41648e-64
ETV5	1138.29	1.17863	0.0687074	17.1543	5.83513e-66	1.43449e-64
RP11-16L9.2	104.809	3.14486	0.183397	17.1478	6.52362e-66	1.60201e-64
HSP90AB1	57581.6	0.900425	0.0525149	17.1461	6.72125e-66	1.64877e-64
TRIP13	983.804	-1.18844	0.0693243	-17.1433	7.05837e-66	1.7296e-64
FNBP4	3916.2	0.950664	0.055468	17.139	7.59945e-66	1.86019e-64
TRAF4	846.343	1.48059	0.0864468	17.1272	9.30013e-66	2.27404e-64
RNF169	1172.28	1.20977	0.070649	17.1236	9.89182e-66	2.41613e-64
ESCO2	1664.78	-1.11875	0.0653524	-17.1187	1.07714e-65	2.62816e-64
SMC3	4834.2	-1.05008	0.061353	-17.1154	1.14017e-65	2.77896e-64
MRS2	1044.47	-1.16108	0.0678866	-17.1033	1.40255e-65	3.41483e-64
C17orf67	145.88	2.52259	0.147513	17.1008	1.46325e-65	3.55881e-64
UBE2B	1587.78	1.22128	0.0714576	17.0909	1.73376e-65	4.21223e-64
DLG4	704.022	1.43936	0.0842212	17.0902	1.75431e-65	4.25761e-64
ABHD10	895.789	-1.5037	0.0881678	-17.055	3.20868e-65	7.77899e-64
DDX1	4485.89	-1.03762	0.0608459	-17.0532	3.30996e-65	8.016e-64
ACADVL	10965.2	0.681871	0.0399868	17.0524	3.35486e-65	8.11613e-64
RPL21	12154.8	0.838343	0.0491632	17.0523	3.36257e-65	8.12614e-64
RNF138	3423.25	1.04863	0.0615241	17.0443	3.85565e-65	9.30789e-64
C2orf44	453.972	-1.67964	0.0985584	-17.0421	4.00404e-65	9.65587e-64
KIAA2026	898.718	1.15258	0.0676371	17.0406	4.10161e-65	9.88073e-64
SKA3	1235.28	-1.1522	0.0676218	-17.0389	4.22289e-65	1.01621e-63
CHSY1	9025.7	0.959324	0.056307	17.0374	4.3374e-65	1.04267e-63
CSGALNACT2	2360.99	1.19365	0.0700973	17.0285	5.05048e-65	1.21281e-63
ABCB10	2371.18	-1.11112	0.0652547	-17.0274	5.14066e-65	1.23316e-63
BCL3	592.439	1.99168	0.116985	17.0251	5.35376e-65	1.28293e-63
ING2	402.379	1.59423	0.0937435	17.0063	7.37082e-65	1.76443e-63
OGFOD1	1673.88	-1.04633	0.0615547	-16.9983	8.4522e-65	2.02117e-63
NID1	70.3132	5.57982	0.328456	16.988	1.00705e-64	2.40563e-63
DMXL2	2630.3	1.06222	0.0625448	16.9834	1.08957e-64	2.60003e-63
CXCR3	165.417	3.02267	0.178088	16.9729	1.30341e-64	3.10704e-63
PM20D2	1688.68	-1.03465	0.0609655	-16.9711	1.34407e-64	3.20063e-63
CPT1A	4716.48	-0.667976	0.0393733	-16.9652	1.48531e-64	3.53326e-63
MRPL13	1639.88	-1.14751	0.0676672	-16.9582	1.6745e-64	3.97916e-63
RANBP1	3422.27	-0.801322	0.0472576	-16.9565	1.72347e-64	4.09126e-63
ABCF2	3184.81	-0.76052	0.0448681	-16.9501	1.91974e-64	4.55243e-63
PAN2	1184.07	1.20354	0.0710168	16.9472	2.01688e-64	4.77782e-63
PIM2	1962.02	0.863612	0.0510065	16.9314	2.64018e-64	6.24788e-63
LCMT2	648.466	-1.38131	0.081654	-16.9166	3.39514e-64	8.02613e-63
ZNF800	1562.52	1.03164	0.0610076	16.9101	3.79202e-64	8.95507e-63
ASB13	403.285	-1.83351	0.108445	-16.9073	3.97798e-64	9.3845e-63
USP53	113.614	3.19755	0.189147	16.9051	4.12496e-64	9.72116e-63
ZDHHC5	4747.28	-0.656322	0.0388761	-16.8824	6.06214e-64	1.42717e-62
NR2C2	438.632	1.46115	0.0865872	16.8749	6.88568e-64	1.61938e-62
FRAT2	1441.15	0.923822	0.0548724	16.8358	1.333e-63	3.13172e-62
CCDC51	517.117	-1.76566	0.104906	-16.8309	1.44919e-63	3.40118e-62
MT-TP	1400.75	1.23069	0.0731372	16.8272	1.54322e-63	3.61816e-62
DNAJC11	1385.01	-1.0226	0.0607909	-16.8216	1.69511e-63	3.97019e-62
PFDN5	4760.92	0.963243	0.0572873	16.8143	1.91893e-63	4.48979e-62
SNRPC	2221.59	-0.810622	0.0482784	-16.7906	2.86074e-63	6.67964e-62
CTSC	5346.76	-0.753138	0.0448979	-16.7745	3.75275e-63	8.75347e-62
TIMM21	772.16	-1.45688	0.0868776	-16.7693	4.08967e-63	9.5296e-62
ZBED4	2635.16	-0.855603	0.0510381	-16.764	4.47471e-63	1.04162e-61
BIRC3	75.9497	5.43439	0.32427	16.7588	4.88019e-63	1.13484e-61
RPUSD2	383.233	-1.7546	0.104716	-16.7559	5.12835e-63	1.19133e-61
UHRF2	3697.09	1.02869	0.0614084	16.7517	5.50544e-63	1.27763e-61
AGGF1	1282.12	-1.23601	0.0738119	-16.7454	6.11966e-63	1.41873e-61
FAM46A	1074.78	1.40479	0.083905	16.7427	6.40565e-63	1.48352e-61
FILIP1L	73.4615	3.92184	0.234387	16.7324	7.61421e-63	1.76163e-61
RPPH1	254.384	5.49714	0.328623	16.7278	8.2252e-63	1.90106e-61
PPP1R12B	1552.35	0.974134	0.058251	16.7231	8.90266e-63	2.05555e-61
AEN	1348.83	-1.02248	0.061164	-16.7171	9.84092e-63	2.26989e-61
MAP3K2	2078.14	1.14237	0.0683413	16.7157	1.008e-62	2.32269e-61
RPL37A	38618	0.796355	0.0476445	16.7145	1.0276e-62	2.36546e-61
RPS27A	29121.9	0.807053	0.0483018	16.7086	1.13557e-62	2.61136e-61
PRKCD	5157.28	-0.608107	0.0364249	-16.6948	1.42958e-62	3.28414e-61
SUPT6H	6453.17	0.631827	0.0379174	16.6632	2.4251e-62	5.56551e-61
LARP1	13688.4	-0.588863	0.035364	-16.6515	2.95266e-62	6.76942e-61
MRTO4	3086.79	-0.748328	0.0449458	-16.6496	3.04752e-62	6.9799e-61
NR2C2AP	824.279	-1.22267	0.0734431	-16.6479	3.1357e-62	7.17465e-61
TMEM66	8745.94	0.87926	0.0528286	16.6436	3.36596e-62	7.69376e-61
INTS10	3963.79	-0.943941	0.056722	-16.6415	3.48676e-62	7.96191e-61
XPO5	4163.25	-0.871187	0.0523764	-16.6332	4.00673e-62	9.14008e-61
PER2	1256.26	0.956112	0.0575006	16.6279	4.37993e-62	9.98142e-61
DPH2	1846.09	-1.07466	0.0646623	-16.6196	5.02522e-62	1.14405e-60
PEX13	598.091	1.28064	0.077063	16.6181	5.1516e-62	1.17166e-60
BSDC1	1154.08	0.94955	0.0571471	16.6159	5.34598e-62	1.21465e-60
LACC1	1026.08	1.07746	0.0648588	16.6124	5.66475e-62	1.2858e-60
HSF2	581.98	1.54239	0.0929279	16.5977	7.24183e-62	1.64213e-60
CSTF2	903.22	-1.08449	0.0653545	-16.5939	7.70927e-62	1.74639e-60
SAV1	751.207	1.07041	0.0645913	16.5721	1.10958e-61	2.51105e-60
RPL38	11300.1	0.708473	0.0427669	16.5659	1.22892e-61	2.77835e-60
NDRG1	2981.01	0.739319	0.0446645	16.5527	1.53002e-61	3.45567e-60
RP11-665G4.1	81.5004	6.41844	0.387977	16.5433	1.78824e-61	4.03487e-60
TRMT5	623.723	-1.5832	0.095767	-16.5318	2.16482e-61	4.87972e-60
WBP1L	1101.06	-1.08602	0.0657034	-16.5292	2.26248e-61	5.09483e-60
CLCN6	566.393	1.25207	0.0758204	16.5137	2.92431e-61	6.57717e-60
TMEM177	279.549	-2.03256	0.123084	-16.5136	2.92652e-61	6.57717e-60
AC139100.2	70.7435	4.54395	0.275224	16.51	3.10811e-61	6.97839e-60
CHORDC1	2274.01	1.02549	0.0621434	16.5019	3.5526e-61	7.96852e-60
NUCKS1	9913.95	-0.927469	0.0562301	-16.4942	4.04015e-61	9.05319e-60
SF3B4	2956.87	-0.815325	0.0494374	-16.4921	4.18428e-61	9.36695e-60
FLAD1	1003.6	-1.11666	0.0677232	-16.4887	4.42601e-61	9.89838e-60
FLCN	800.403	1.14669	0.0695452	16.4884	4.44652e-61	9.93448e-60
TRIM66	998.833	1.12882	0.0684791	16.4841	4.7716e-61	1.06503e-59
TOR1A	1648.61	-0.937146	0.0568551	-16.4831	4.85556e-61	1.08271e-59
WDR36	2095.72	-1.03848	0.0630075	-16.4818	4.95965e-61	1.10484e-59
SLC35C1	851.805	-1.49661	0.0908214	-16.4786	5.22936e-61	1.16379e-59
SPTY2D1	1706.82	0.886465	0.0538694	16.4558	7.61968e-61	1.6941e-59
PCYOX1	1299.44	-1.22503	0.0744743	-16.449	8.52581e-61	1.89371e-59
CALM3	9061.17	-0.70166	0.0426645	-16.446	8.96221e-61	1.9887e-59
WDR89	634.482	-1.34675	0.0819299	-16.4379	1.02432e-60	2.26853e-59
DUSP14	337.069	1.4143	0.086151	16.4165	1.45767e-60	3.22514e-59
RHOBTB2	1416.3	-1.34537	0.0819573	-16.4155	1.48048e-60	3.27242e-59
JMJD6	1195.51	0.935413	0.0570412	16.3989	1.94742e-60	4.30036e-59
MT-CO2	94040.1	0.834155	0.0508844	16.3931	2.14098e-60	4.72321e-59
EEF2K	1485.67	-0.945698	0.0577275	-16.3821	2.5669e-60	5.65736e-59
BYSL	1193.66	-0.955637	0.0583717	-16.3716	3.05166e-60	6.71925e-59
TRIM21	726.026	-1.25381	0.0765994	-16.3683	3.21822e-60	7.07914e-59
DRAM1	184.272	2.06053	0.125894	16.3672	3.27927e-60	7.20648e-59
RPL39	3282.27	0.977965	0.0597586	16.3653	3.38555e-60	7.43289e-59
CCNI	12855.5	0.890227	0.0543976	16.3652	3.38937e-60	7.4341e-59
RP11-325F22.2	77.6727	3.70374	0.226482	16.3533	4.11985e-60	9.02762e-59
RPS29	17221.2	0.831264	0.0509234	16.3238	6.68472e-60	1.46198e-58
TGFBRAP1	1328.19	-0.966506	0.0592101	-16.3233	6.73513e-60	1.47159e-58
AMER1	541.415	-1.46471	0.0897508	-16.3197	7.14598e-60	1.55986e-58
MRPL3	4560.93	-0.81088	0.0497229	-16.308	8.66019e-60	1.88858e-58
EAF1	843.665	1.14322	0.0701579	16.295	1.07172e-59	2.33493e-58
WDFY2	1164.05	1.12279	0.0689238	16.2902	1.15778e-59	2.52001e-58
SUMO3	4126.76	-0.683929	0.0419844	-16.2901	1.16119e-59	2.52504e-58
UAP1L1	637.789	1.48869	0.0914968	16.2703	1.60243e-59	3.47788e-58
EIF3H	18099.2	0.744652	0.0457961	16.2602	1.89168e-59	4.10177e-58
ASAP1	1321.69	1.03604	0.0637213	16.2589	1.93284e-59	4.18703e-58
AKAP8L	2585.17	1.06244	0.0654033	16.2445	2.44424e-59	5.2848e-58
LAMTOR1	2535.53	-0.822701	0.050698	-16.2275	3.22382e-59	6.96377e-58
RTN4	4246.42	0.739319	0.0455763	16.2216	3.55002e-59	7.66112e-58
ERH	3888.38	-0.878147	0.0541758	-16.2092	4.33972e-59	9.35647e-58
S100A11	4014.82	0.593627	0.0366255	16.208	4.42614e-59	9.53377e-58
GCNT1	1061.56	-1.14736	0.070792	-16.2075	4.46141e-59	9.60066e-58
RPL7	44077.3	0.811991	0.0501332	16.1967	5.32238e-59	1.14426e-57
SLC26A2	1164.88	-1.1402	0.0704003	-16.1959	5.39056e-59	1.15783e-57
SPRY4	64.0799	4.70427	0.290503	16.1935	5.60201e-59	1.20211e-57
POGZ	2163.66	0.800806	0.0494732	16.1867	6.26367e-59	1.34283e-57
DCAF12	3802.54	-0.90213	0.055772	-16.1753	7.53018e-59	1.61283e-57
ANKRD36C	226.819	1.85693	0.114854	16.1677	8.51866e-59	1.82283e-57
GPR84	94.8879	2.97383	0.184009	16.1613	9.44709e-59	2.0196e-57
RILPL2	4141.92	0.688947	0.0426467	16.1548	1.05121e-58	2.24517e-57
AC006033.22	67.2716	4.18354	0.259055	16.1493	1.14918e-58	2.45212e-57
B3GNT2	2612.24	1.01219	0.0626859	16.1471	1.19094e-58	2.53885e-57
PPARGC1B	834.245	-1.24865	0.0774019	-16.132	1.51994e-58	3.23719e-57
MED20	891.982	-1.27112	0.0788302	-16.1248	1.70915e-58	3.63678e-57
MMACHC	361.914	-1.81136	0.112372	-16.1193	1.86649e-58	3.96785e-57
RPL34	14192.9	0.879975	0.0546365	16.106	2.31563e-58	4.91807e-57
MGEA5	3877.56	0.907501	0.0563601	16.1018	2.47655e-58	5.25494e-57
RFX3	179.859	2.61361	0.162339	16.0997	2.56347e-58	5.43431e-57
PLAUR	1833.91	0.836949	0.0520111	16.0917	2.91605e-58	6.17601e-57
GOPC	1275.49	-1.08062	0.0671863	-16.0839	3.30961e-58	7.00304e-57
RPS7	18555.5	0.613385	0.0381638	16.0724	3.98165e-58	8.41723e-57
CIAPIN1	1295.37	-1.04581	0.0650841	-16.0685	4.23999e-58	8.95506e-57
BRIX1	1601.58	-0.942611	0.0587178	-16.0533	5.42414e-58	1.14454e-56
SF3A3	6283.32	-0.923727	0.0575575	-16.0488	5.83126e-58	1.22931e-56
SNX17	4434.25	-0.718159	0.0447636	-16.0434	6.36022e-58	1.33959e-56
RPS6	73163.9	0.789347	0.0492134	16.0393	6.79367e-58	1.42956e-56
ELF1	15252.3	0.946889	0.0590388	16.0384	6.88863e-58	1.4482e-56
MT-ND5	47162.2	0.880584	0.0549146	16.0355	7.21916e-58	1.51629e-56
SPC25	565.101	-1.42454	0.088873	-16.029	8.02161e-58	1.68328e-56
LRRFIP1	6039.88	0.950806	0.0593203	16.0283	8.10194e-58	1.69857e-56
SRGAP2C	112.702	2.74025	0.170977	16.027	8.2755e-58	1.73337e-56
CANT1	1595.24	-1.09005	0.0680367	-16.0216	9.03314e-58	1.89032e-56
ZNF480	1007.68	-1.22366	0.0763903	-16.0186	9.47734e-58	1.98146e-56
ZNF460	156.709	2.26295	0.141344	16.0102	1.08433e-57	2.26496e-56
AASDHPPT	1474.32	-1.16518	0.0727836	-16.0088	1.10985e-57	2.31616e-56
FAM136A	2297.79	-0.855958	0.0534718	-16.0076	1.13013e-57	2.35631e-56
CAD	4526.77	-0.825477	0.0515702	-16.0069	1.14427e-57	2.38362e-56
TFAP4	717.418	-1.85823	0.116105	-16.0047	1.18464e-57	2.46546e-56
RHOU	654.142	-1.30375	0.0814683	-16.0031	1.21505e-57	2.52645e-56
RP5-821D11.7	166.302	2.01747	0.126143	15.9935	1.41736e-57	2.94442e-56
CCNB1IP1	3855.8	0.934681	0.0584509	15.9909	1.47927e-57	3.07022e-56
GABPB1-AS1	308.015	1.801	0.112672	15.9844	1.64071e-57	3.4022e-56
NOL10	1629.11	-0.988753	0.0618604	-15.9836	1.66197e-57	3.44315e-56
EIF3L	20526.2	0.792769	0.0496086	15.9805	1.74863e-57	3.6194e-56
SLC25A46	2091.53	-0.978166	0.0612313	-15.9749	1.91033e-57	3.95049e-56
PSMD7	2402.14	-0.764766	0.0478744	-15.9744	1.92662e-57	3.98057e-56
C8orf33	3116.42	-0.789417	0.049443	-15.9662	2.19821e-57	4.53348e-56
MAP4K3	457.972	1.62119	0.101539	15.9662	2.19684e-57	4.53348e-56
PSEN1	3604.61	0.984737	0.0616898	15.9627	2.3236e-57	4.78775e-56
PAICS	11999	-0.824969	0.0516937	-15.9588	2.47473e-57	5.09455e-56
PVR	2395.16	0.703454	0.0440884	15.9556	2.60643e-57	5.36082e-56
MED13	3613.04	1.09985	0.0689492	15.9515	2.78004e-57	5.71274e-56
HEATR3	1201.34	-1.18305	0.074207	-15.9426	3.20836e-57	6.58696e-56
ST3GAL6	123.825	2.4862	0.155963	15.9409	3.29557e-57	6.75993e-56
GPD1L	972.061	-1.10052	0.0690516	-15.9376	3.47451e-57	7.12055e-56
VRK1	2765.76	-0.902195	0.0566356	-15.9298	3.93509e-57	8.0572e-56
POLR3H	1279.83	-1.43203	0.089967	-15.9173	4.80471e-57	9.82896e-56
UBE2T	1271.81	-1.05013	0.0659796	-15.9159	4.91497e-57	1.00455e-55
SALL4	171.103	2.3493	0.147629	15.9136	5.09835e-57	1.0411e-55
KIF1B	468.03	1.65531	0.10404	15.9103	5.37372e-57	1.09634e-55
CXorf21	6142.55	-0.893666	0.0561767	-15.9081	5.56693e-57	1.13475e-55
TSPAN14	991.826	-1.09623	0.068925	-15.9048	5.87321e-57	1.19611e-55
SOGA1	2906.47	-0.728526	0.045807	-15.9042	5.92176e-57	1.20492e-55
RP11-349A22.5	1301.45	1.12362	0.0706636	15.9009	6.24285e-57	1.26912e-55
RFC3	1826.18	-1.04858	0.0659499	-15.8997	6.37001e-57	1.29382e-55
MOK	87.4752	2.92925	0.184328	15.8915	7.25323e-57	1.4719e-55
RP2	1649.83	1.10479	0.0695321	15.8889	7.56819e-57	1.53444e-55
HN1	2674.09	-0.898944	0.0565956	-15.8836	8.2261e-57	1.66635e-55
BHLHE40	1286.83	0.887609	0.0558882	15.8819	8.46065e-57	1.71234e-55
MRPS26	726.642	-1.38783	0.0875308	-15.8553	1.29143e-56	2.61139e-55
CBX5	7636.23	-0.826063	0.0521195	-15.8494	1.41936e-56	2.86754e-55
SLFN11	698.871	-1.33369	0.0842272	-15.8345	1.80025e-56	3.63383e-55
ZNF766	811.71	-1.33309	0.0842207	-15.8285	1.97744e-56	3.98795e-55
VPS35	5237.4	-0.966129	0.0610688	-15.8203	2.25332e-56	4.5403e-55
YKT6	2773.34	-0.748043	0.0472851	-15.8199	2.26981e-56	4.56949e-55
NUDCD3	1729.85	-0.877374	0.0555795	-15.7859	3.88849e-56	7.82125e-55
MALSU1	411.558	-1.546	0.0979618	-15.7817	4.15747e-56	8.35491e-55
TRA2B	12223	0.613453	0.0388937	15.7725	4.80737e-56	9.65244e-55
PSMC2	3058.6	-0.863269	0.0547412	-15.77	5.00462e-56	1.00396e-54
ARL4A	774.494	1.22619	0.0777689	15.767	5.24433e-56	1.05113e-54
RP11-710C12.1	284.045	1.92213	0.122003	15.7548	6.36838e-56	1.2753e-54
MPP6	540.571	-1.43215	0.0909311	-15.7498	6.8846e-56	1.37746e-54
PTGFRN	859.112	-1.11492	0.0708231	-15.7424	7.74706e-56	1.54867e-54
MAPKAPK2	4778.54	0.607371	0.0385897	15.7392	8.14683e-56	1.62715e-54
FNDC3A	2187.03	0.928888	0.059062	15.7273	9.82802e-56	1.96122e-54
YTHDF3	4253.07	0.928205	0.0590269	15.7251	1.01765e-55	2.02899e-54
SSR1	8873.26	-0.899502	0.0572032	-15.7247	1.02459e-55	2.04103e-54
ASS1	15840.1	0.591248	0.0376016	15.724	1.03565e-55	2.06127e-54
B4GALT2	918.961	-1.31005	0.0833726	-15.7131	1.22919e-55	2.44432e-54
RPSA	25483.8	0.769105	0.0489485	15.7125	1.24088e-55	2.46543e-54
GAR1	1139.57	-0.982072	0.0625238	-15.7072	1.35064e-55	2.68116e-54
MRPS7	1339.61	-0.926783	0.0590142	-15.7044	1.41101e-55	2.79857e-54
STK38L	1113.94	1.13059	0.0719969	15.7033	1.43518e-55	2.84402e-54
CYP1B1	765.401	1.11073	0.0707835	15.6919	1.71753e-55	3.4006e-54
FAM98B	1626.47	-1.10287	0.0703343	-15.6803	2.06162e-55	4.07832e-54
FARSB	3102.96	-1.01446	0.0647362	-15.6707	2.4003e-55	4.74418e-54
EIF1B	2591.24	0.876958	0.0560361	15.6499	3.32901e-55	6.57408e-54
RPS2P46	6709.18	0.720834	0.0460811	15.6427	3.72496e-55	7.34962e-54
PPCS	1461.71	-0.920212	0.0588891	-15.6262	4.82838e-55	9.51851e-54
MARVELD1	929.505	-1.0205	0.0653095	-15.6255	4.87702e-55	9.60608e-54
NADK2	1301.29	-1.07829	0.0690128	-15.6245	4.95869e-55	9.75851e-54
ZEB2	12173.9	0.737097	0.0471958	15.6179	5.50233e-55	1.0819e-53
U2AF1	3907.54	0.614236	0.0393537	15.6081	6.41384e-55	1.26004e-53
SLC33A1	1364.4	-0.951444	0.0609642	-15.6066	6.56341e-55	1.28832e-53
PEX11B	605.08	-1.34883	0.0864726	-15.5984	7.46482e-55	1.46399e-53
SAP30L	825.425	-1.13949	0.0730612	-15.5963	7.71304e-55	1.51137e-53
TMED9	7044.57	-0.587235	0.0376597	-15.5932	8.09907e-55	1.58565e-53
RRS1	1357.31	-1.87147	0.120135	-15.5781	1.02579e-54	2.00659e-53
SPC24	699.558	-1.21444	0.0779951	-15.5708	1.14996e-54	2.24756e-53
RNF26	1031.35	-1.27667	0.0819972	-15.5697	1.16953e-54	2.28385e-53
FBXW7	1096.41	1.08042	0.0694062	15.5666	1.22785e-54	2.39567e-53
TM2D2	956.754	-1.15811	0.0744226	-15.5613	1.333e-54	2.59861e-53
SEC31B	469.511	1.39909	0.0899675	15.5511	1.56512e-54	3.0485e-53
IL6ST	437.173	1.58667	0.10216	15.5313	2.13067e-54	4.14653e-53
SPRYD3	1068.23	-1.04841	0.0675332	-15.5244	2.37098e-54	4.61026e-53
TMEM104	1490	-1.18751	0.076531	-15.5167	2.6729e-54	5.1929e-53
CSTF2T	1750.79	-1.06385	0.0686006	-15.5078	3.07162e-54	5.96245e-53
RP11-690G19.3	402.555	1.69357	0.109226	15.5053	3.19528e-54	6.19722e-53
Y_RNA	382.351	1.59702	0.103054	15.4969	3.63849e-54	7.0508e-53
ZMYND19	918.778	-1.16784	0.075369	-15.495	3.75235e-54	7.26529e-53
UBE2V2	3118.57	-0.96797	0.0624956	-15.4886	4.14101e-54	8.01099e-53
POLR2D	1273.44	-1.01208	0.0653557	-15.4856	4.33746e-54	8.38391e-53
WARS2	587.295	1.20179	0.0776153	15.484	4.45069e-54	8.5955e-53
NUFIP1	475.969	-1.36394	0.0881286	-15.4767	4.98317e-54	9.6157e-53
RPL9	22615.4	0.804429	0.0519866	15.4738	5.21528e-54	1.00551e-52
NOP9	1168.89	-0.958346	0.0619709	-15.4644	6.02865e-54	1.16134e-52
TEC	909.624	1.07075	0.0692462	15.4629	6.17078e-54	1.18772e-52
RERE	999.535	1.20253	0.0779773	15.4216	1.17214e-53	2.25418e-52
MRPL19	1188.23	-1.09001	0.0707261	-15.4117	1.36668e-53	2.62608e-52
DDX19A	1229.37	-1.0024	0.0650425	-15.4114	1.37158e-53	2.63327e-52
SENP5	1400.51	1.11908	0.0726679	15.3999	1.64001e-53	3.14597e-52
UCHL5	2641.81	-0.929776	0.0603764	-15.3996	1.64572e-53	3.15427e-52
IFFO2	399.943	1.48378	0.0963735	15.3962	1.73679e-53	3.32603e-52
ERV3-1	280.907	1.59623	0.103709	15.3915	1.86758e-53	3.5735e-52
EXOSC2	1303.99	-1.0998	0.0714669	-15.3889	1.94309e-53	3.71486e-52
UCP2	4800.95	-0.789815	0.0513478	-15.3817	2.17261e-53	4.15018e-52
ZCCHC8	1277.91	1.07329	0.0698244	15.3713	2.55188e-53	4.87059e-52
ZNFX1	2029.29	0.855223	0.0556519	15.3674	2.71027e-53	5.16857e-52
C16orf87	425.841	1.2791	0.0832547	15.3638	2.86496e-53	5.45899e-52
PHAX	1082.23	-1.02167	0.0665118	-15.3608	2.99991e-53	5.71137e-52
KNOP1	350.382	-1.60086	0.104266	-15.3535	3.35407e-53	6.38029e-52
NOV	53.666	4.93519	0.32168	15.3419	4.0119e-53	7.6253e-52
CEBPB	871.969	1.51913	0.0990427	15.3381	4.25161e-53	8.07415e-52
MYBL2	3912.11	-1.022	0.0666564	-15.3324	4.64559e-53	8.81502e-52
SF3A1	8312.2	0.598043	0.039021	15.3262	5.11096e-53	9.68999e-52
YTHDC1	2661.01	0.825365	0.053868	15.322	5.45338e-53	1.03306e-51
PLEKHF1	509.971	3.70556	0.241849	15.3218	5.46576e-53	1.03374e-51
UBR5	6621.8	0.886461	0.0578561	15.3218	5.46602e-53	1.03374e-51
MIDN	2200.93	1.52569	0.0996142	15.316	5.97772e-53	1.12957e-51
R3HDM2	872.573	1.20373	0.0786864	15.2979	7.90097e-53	1.49176e-51
GPT2	2755.8	0.958755	0.0626741	15.2975	7.95006e-53	1.49978e-51
VAMP1	355.267	1.32587	0.0866958	15.2933	8.47422e-53	1.59636e-51
WDR74	1008	-0.960324	0.0627938	-15.2933	8.47602e-53	1.59636e-51
TIFAB	4212.65	-0.668419	0.043715	-15.2904	8.86323e-53	1.66791e-51
CCDC157	73.5321	3.59162	0.235094	15.2774	1.08169e-52	2.03389e-51
STARD7	8370.8	-0.800048	0.0523786	-15.2743	1.13424e-52	2.13094e-51
FCGR1B	274.451	1.72776	0.113132	15.272	1.17503e-52	2.20574e-51
CTCF	2931.02	-0.843559	0.0552444	-15.2696	1.21952e-52	2.28737e-51
ZNF526	690.904	-1.36998	0.0898005	-15.2559	1.50493e-52	2.82037e-51
MFHAS1	950.402	-1.07287	0.0703333	-15.2541	1.54572e-52	2.89445e-51
SLC35A4	1860.41	-0.856834	0.0561886	-15.2492	1.66568e-52	3.11652e-51
ARPC1A	1419.02	-0.901483	0.0591247	-15.2471	1.71991e-52	3.21534e-51
TVP23C	107.48	2.74772	0.18022	15.2464	1.73837e-52	3.24718e-51
STEAP3	493.991	-1.34007	0.0879377	-15.2389	1.95113e-52	3.64163e-51
PAXBP1	2133.33	0.91195	0.059846	15.2383	1.97003e-52	3.67389e-51
SDAD1	1807.98	-1.08008	0.0708808	-15.238	1.97716e-52	3.68419e-51
KMT2A	4040.89	0.93962	0.0616717	15.2358	2.04477e-52	3.80393e-51
ITGB5	628.054	1.15146	0.0755928	15.2324	2.15604e-52	4.00767e-51
RABEP1	2937.43	-0.781516	0.0513068	-15.2322	2.16146e-52	4.01446e-51
SRRD	432.241	-1.4482	0.0950922	-15.2294	2.25531e-52	4.18535e-51
RFC2	2062.45	-0.859005	0.0564062	-15.2289	2.27306e-52	4.21487e-51
SLC43A3	1959.62	-0.760931	0.0500054	-15.217	2.72882e-52	5.05587e-51
ZBTB24	684.175	-1.39215	0.0914911	-15.2163	2.75889e-52	5.10742e-51
RHNO1	1196.89	-1.04232	0.068543	-15.2068	3.18801e-52	5.89703e-51
COG2	1168.57	-0.975362	0.0641929	-15.1942	3.86125e-52	7.13657e-51
ANAPC13	1080.68	-1.26192	0.0830575	-15.1933	3.91791e-52	7.23542e-51
MRPL49	1130.75	-0.965204	0.0635356	-15.1915	4.02385e-52	7.42505e-51
MKI67	12560.1	-0.809889	0.0533411	-15.1832	4.56878e-52	8.42378e-51
LINC00152	212.868	1.74731	0.11515	15.1742	5.23779e-52	9.64947e-51
WTAP	2936.01	0.896533	0.0590934	15.1715	5.46495e-52	1.00598e-50
ORC5	652.573	-1.18675	0.0782476	-15.1666	5.88209e-52	1.0819e-50
TLR2	1948.55	1.06517	0.0702339	15.1661	5.93367e-52	1.0905e-50
HIST1H2BJ	54.5932	3.95823	0.261004	15.1654	5.99286e-52	1.10049e-50
MFN2	3177.56	-0.638934	0.0421382	-15.1628	6.23208e-52	1.1435e-50
TMEM198B	405.54	1.45235	0.0958134	15.1581	6.69312e-52	1.22711e-50
HCAR2	454.156	11.0055	0.72662	15.1462	8.03329e-52	1.47163e-50
RP11-465B22.3	77.1765	2.88853	0.190729	15.1446	8.22054e-52	1.50472e-50
DBR1	822.336	-1.0835	0.0715483	-15.1436	8.35221e-52	1.5276e-50
IL31RA	251.684	1.86116	0.123025	15.1283	1.05324e-51	1.9248e-50
RPL3	84179.5	0.73207	0.0484044	15.124	1.12437e-51	2.05316e-50
CHMP7	2487.9	-0.704638	0.046591	-15.1239	1.12653e-51	2.05545e-50
CCNG1	4210.86	0.983108	0.0650519	15.1127	1.3361e-51	2.43588e-50
AP1G2	488.09	1.25875	0.0833013	15.1108	1.37446e-51	2.5038e-50
WDR33	2567.97	-0.758255	0.0501909	-15.1074	1.44707e-51	2.63397e-50
HNRNPR	8143.16	-0.843597	0.0558408	-15.1072	1.45216e-51	2.64112e-50
ZNF146	6992.38	-0.858153	0.0568276	-15.101	1.59531e-51	2.89916e-50
GNPNAT1	736.665	-1.24863	0.0827525	-15.0888	1.92029e-51	3.48698e-50
PTOV1-AS1	478.729	1.26451	0.0838108	15.0877	1.95137e-51	3.54059e-50
ACADSB	724.259	-1.28541	0.0852058	-15.086	2.00277e-51	3.63097e-50
USP5	3033.1	-0.690472	0.0457763	-15.0836	2.07648e-51	3.7616e-50
RPL22	15144	0.76224	0.0505725	15.0722	2.46692e-51	4.46535e-50
C6orf89	2221.5	-0.846028	0.0561364	-15.0709	2.51575e-51	4.55012e-50
RPL23AP53	123.2	2.28471	0.151703	15.0604	2.95022e-51	5.33168e-50
MANEA	574.653	-1.5186	0.101065	-15.0259	4.96548e-51	8.96659e-50
E2F2	409.954	-1.70852	0.113721	-15.0237	5.13311e-51	9.26195e-50
HNRNPDL	9973.5	0.657916	0.0437951	15.0226	5.22197e-51	9.41483e-50
CHAF1B	645.062	-1.39862	0.0931039	-15.0222	5.25404e-51	9.46516e-50
IRF2BP2	6070.14	-0.664756	0.0442528	-15.0218	5.28761e-51	9.51812e-50
IRF9	92.2824	2.9801	0.198483	15.0144	5.90723e-51	1.06251e-49
NOL11	2874.85	-0.900589	0.0600016	-15.0094	6.37184e-51	1.14517e-49
FAM13B	1683.63	0.937181	0.0624543	15.0059	6.72076e-51	1.20693e-49
CLPX	1584.35	-0.931824	0.0621195	-15.0005	7.28792e-51	1.30775e-49
NFKBIE	468.45	1.53387	0.102276	14.9975	7.62858e-51	1.3678e-49
XRCC2	656.805	-1.23684	0.0824813	-14.9954	7.87079e-51	1.41012e-49
NCAPD2	7806.84	-0.628137	0.0418987	-14.9918	8.30553e-51	1.48684e-49
GPBP1	3403.25	1.06294	0.0709128	14.9893	8.62055e-51	1.54202e-49
PIGS	2275.14	-0.707968	0.0472418	-14.9861	9.05606e-51	1.61865e-49
OPA3	1780.83	-0.823573	0.0549594	-14.9851	9.18464e-51	1.64035e-49
ARHGEF12	1537.1	0.937827	0.0626074	14.9795	9.9976e-51	1.78414e-49
C12orf4	1176.83	-1.13564	0.0758686	-14.9685	1.17887e-50	2.10214e-49
TPX2	5642.04	-0.801134	0.0535559	-14.9589	1.3636e-50	2.42964e-49
ARMC1	2043.57	-1.0265	0.0686222	-14.9587	1.36743e-50	2.43455e-49
FIGNL1	699.516	-1.31849	0.0881616	-14.9553	1.43746e-50	2.55725e-49
MACF1	4988.85	0.845863	0.0565831	14.949	1.58035e-50	2.80926e-49
DYRK1B	304.7	2.33395	0.15617	14.945	1.68002e-50	2.9841e-49
RMI2	761.745	-1.35942	0.0910041	-14.938	1.86408e-50	3.30588e-49
GARS	12614.8	0.760987	0.0509478	14.9366	1.90427e-50	3.37453e-49
RLIM	3279.4	0.890015	0.0595908	14.9354	1.93788e-50	3.43141e-49
C11orf24	983.836	-1.32613	0.0888118	-14.9319	2.04278e-50	3.61436e-49
PFAS	2633.86	-1.10278	0.0738563	-14.9314	2.05992e-50	3.64185e-49
HOXA9	1231.08	0.994741	0.0666337	14.9285	2.1506e-50	3.79923e-49
EIF4G1	17639.2	-0.632507	0.0423706	-14.928	2.16781e-50	3.82667e-49
EIF2AK1	4097.74	-0.870074	0.0583823	-14.9031	3.14838e-50	5.55328e-49
LRRC47	1310.28	-1.0619	0.0712728	-14.899	3.34373e-50	5.89329e-49
MED18	581.752	-1.29665	0.0870758	-14.891	3.77087e-50	6.64098e-49
RP11-497G19.1	1055.86	-1.11919	0.075174	-14.888	3.94217e-50	6.9373e-49
CHIC2	320.946	1.54088	0.103588	14.8751	4.78381e-50	8.41189e-49
FUCA1	920.732	-1.00043	0.0672557	-14.875	4.78814e-50	8.41303e-49
PNISR	3749.25	0.963208	0.0647695	14.8713	5.06006e-50	8.88395e-49
NOP2	3368.28	-0.7273	0.0489106	-14.87	5.16128e-50	9.05469e-49
CXCR2	248.451	-2.23234	0.150234	-14.8591	6.07405e-50	1.06478e-48
RPL5	42959.3	0.762912	0.0513478	14.8577	6.19795e-50	1.08567e-48
PNMA1	985.973	0.974621	0.0656076	14.8553	6.42763e-50	1.12503e-48
RPS24	29293.6	0.743684	0.0500826	14.8492	7.04526e-50	1.23219e-48
DDX26B	1405.31	1.02943	0.0693811	14.8373	8.40766e-50	1.46934e-48
GGNBP2	2197.65	0.76402	0.0515275	14.8274	9.73925e-50	1.70075e-48
C1orf131	665.805	-1.3686	0.0923613	-14.8179	1.12299e-49	1.95956e-48
DIXDC1	323.134	1.4304	0.0965407	14.8166	1.1446e-49	1.99574e-48
TIPIN	710.315	-1.35033	0.091153	-14.8138	1.1926e-49	2.07784e-48
AFTPH	2498.6	0.859249	0.0581345	14.7804	1.96134e-49	3.41459e-48
TMEM192	1575.83	-0.932577	0.0631279	-14.7728	2.19338e-49	3.81565e-48
KIAA1279	474.497	-1.2688	0.0858909	-14.7722	2.21373e-49	3.84811e-48
ATXN2L	5481.29	0.784896	0.053155	14.7662	2.42014e-49	4.2037e-48
SOS2	1663.25	1.06919	0.0724229	14.7631	2.53254e-49	4.39558e-48
ACTN2	70.4602	3.09708	0.209823	14.7605	2.63485e-49	4.56968e-48
NUP155	2694.16	-0.993108	0.067308	-14.7547	2.87113e-49	4.97568e-48
TANC2	451.225	1.20318	0.0815571	14.7526	2.96129e-49	5.12803e-48
PCBP2	5126.69	0.971255	0.0658424	14.7512	3.02188e-49	5.22898e-48
TMPO-AS1	310.934	-1.7552	0.119036	-14.7451	3.31004e-49	5.72325e-48
B3GALNT2	1241.63	1.00039	0.0678493	14.7443	3.34631e-49	5.78158e-48
NMT1	3562.84	-0.652036	0.0442233	-14.7442	3.35356e-49	5.78971e-48
BAG4	1798.5	0.830223	0.0563119	14.7433	3.39735e-49	5.86087e-48
ACAD9	1328.17	-0.88008	0.0597088	-14.7396	3.5916e-49	6.19129e-48
CREB1	2127.88	0.948205	0.0644138	14.7205	4.75838e-49	8.19642e-48
SEC23IP	2536.71	-0.846936	0.0575362	-14.7201	4.79278e-49	8.24945e-48
STAT2	2099.87	1.03214	0.0701206	14.7195	4.83397e-49	8.31406e-48
ZCCHC17	846.979	-1.20077	0.0815782	-14.7193	4.84936e-49	8.33424e-48
PES1	4708.33	-0.857979	0.0583184	-14.712	5.39945e-49	9.27264e-48
CPSF2	4232.91	-0.799099	0.0543606	-14.7	6.45046e-49	1.10692e-47
NUP37	1150.33	-0.92889	0.0632013	-14.6973	6.70516e-49	1.14977e-47
DNAH1	1005.6	0.976232	0.0664767	14.6853	8.0054e-49	1.37169e-47
ERGIC3	5080.63	0.653505	0.0445114	14.6818	8.43734e-49	1.44462e-47
INCENP	2283.9	-1.06452	0.0725069	-14.6816	8.46093e-49	1.44757e-47
LAS1L	2357.57	-0.653096	0.0444872	-14.6805	8.59135e-49	1.46878e-47
NFE2	339	-1.87403	0.127731	-14.6717	9.77907e-49	1.67058e-47
BCL2L1	690.575	-1.29588	0.0883655	-14.665	1.07979e-48	1.84324e-47
PLEKHM2	1805.24	1.70044	0.116109	14.6452	1.44613e-48	2.46675e-47
EIF2AK3	775.309	1.2857	0.0878093	14.642	1.51639e-48	2.58467e-47
MYD88	1419.76	-0.913791	0.0624453	-14.6335	1.71828e-48	2.92659e-47
CEP350	4544.04	0.852101	0.0582608	14.6256	1.92778e-48	3.28097e-47
PCYT1A	1645.86	-0.836129	0.0571803	-14.6227	2.01354e-48	3.42436e-47
IQCB1	1981.93	1.0334	0.0706896	14.6188	2.13143e-48	3.62216e-47
ZFR	21938.4	0.814291	0.0557077	14.6172	2.18151e-48	3.70174e-47
PTPN22	954.347	1.1677	0.0798977	14.6149	2.25758e-48	3.82798e-47
PSMG1	1824.29	-0.832561	0.0569719	-14.6135	2.30261e-48	3.90142e-47
FAM96A	1682.52	-0.858628	0.058762	-14.612	2.35653e-48	3.98982e-47
SLAIN2	2190.2	0.924841	0.0633098	14.6082	2.49115e-48	4.21462e-47
C1orf174	732.14	-1.10194	0.0754389	-14.6071	2.53105e-48	4.27893e-47
MFSD2A	725.288	0.948845	0.0649602	14.6066	2.5508e-48	4.30914e-47
ZFAND3	2492.06	0.702851	0.0481395	14.6003	2.79581e-48	4.71954e-47
TBX3	363.23	1.20239	0.0823554	14.6	2.80662e-48	4.73428e-47
CYTH4	4137.36	-0.886674	0.0607411	-14.5976	2.90931e-48	4.90386e-47
DAXX	1952.87	-0.709889	0.0486394	-14.5949	3.0247e-48	5.0946e-47
TYMS	1594.41	-0.942658	0.0646052	-14.5911	3.20224e-48	5.38965e-47
EIF2S1	4607.25	-0.824035	0.0564905	-14.5871	3.39071e-48	5.70266e-47
CNOT7	3812.81	-0.968626	0.0664303	-14.5811	3.7061e-48	6.2239e-47
DDN	150.411	-2.5407	0.174257	-14.5801	3.75726e-48	6.30516e-47
SREBF2	8065.77	0.757222	0.0519643	14.572	4.23526e-48	7.10208e-47
ODF3L1	61.8881	4.0932	0.281124	14.5602	5.03459e-48	8.43627e-47
MRPL35	1396.28	-0.982266	0.0675968	-14.5313	7.67941e-48	1.28586e-46
WDHD1	1292.68	-1.15869	0.0797886	-14.5221	8.7831e-48	1.46959e-46
TMBIM4	2672.97	-0.798105	0.0549606	-14.5214	8.86742e-48	1.48261e-46
HSD17B11	3436.07	0.941513	0.0648824	14.5111	1.03087e-47	1.72232e-46
FBXW11	1790.91	0.826854	0.0569978	14.5068	1.09761e-47	1.83249e-46
EIF2B1	2198.44	-0.880501	0.0607149	-14.5022	1.17299e-47	1.95691e-46
NDC1	3478.21	-0.925491	0.0638178	-14.5021	1.17546e-47	1.95959e-46
UTP23	1891.97	-1.00157	0.0691113	-14.4921	1.35848e-47	2.26304e-46
GOLGA4	2252.44	1.02726	0.0709037	14.4881	1.44175e-47	2.4e-46
DOLK	293.19	-1.85484	0.128141	-14.475	1.74414e-47	2.90126e-46
ATXN7	881.013	0.994796	0.0687667	14.4662	1.97994e-47	3.29108e-46
SAFB2	2727.44	0.930203	0.064316	14.463	2.07479e-47	3.44624e-46
ZNF277	837.688	1.11293	0.0769884	14.4558	2.30588e-47	3.82729e-46
TOP3A	1455.21	-0.838749	0.0580648	-14.4451	2.69358e-47	4.46754e-46
ZMPSTE24	2455.59	-0.859895	0.0595578	-14.438	2.98486e-47	4.94706e-46
MRPL39	1095.16	-1.14385	0.0792465	-14.434	3.16044e-47	5.23425e-46
IMP4	2394.39	-0.905874	0.0627859	-14.428	3.44977e-47	5.70928e-46
ZNF503	152.199	2.58931	0.179564	14.42	3.87394e-47	6.40663e-46
ARHGEF40	659.144	1.41434	0.0982537	14.3948	5.5775e-47	9.21724e-46
CPNE8	408.648	1.31567	0.0914063	14.3937	5.66949e-47	9.36247e-46
TAPT1	610.74	1.28713	0.0895375	14.3753	7.39045e-47	1.21868e-45
GEMIN6	389.513	-1.53272	0.106628	-14.3745	7.48233e-47	1.23293e-45
RNF34	1179.93	-1.03476	0.0719932	-14.3731	7.63726e-47	1.25755e-45
GTF2B	1741.11	1.00439	0.0699184	14.3652	8.5616e-47	1.40874e-45
BCL2L11	1600.51	0.899037	0.0626002	14.3616	9.01717e-47	1.48263e-45
INO80	2157.4	0.67778	0.0471972	14.3606	9.1446e-47	1.5025e-45
C12orf52	582.043	-1.49422	0.10406	-14.3592	9.32628e-47	1.53124e-45
TSPAN3	2009.3	-0.872343	0.0607524	-14.359	9.35683e-47	1.53515e-45
SASH1	533.54	1.14658	0.079879	14.3539	1.0066e-46	1.65033e-45
PTX3	47.8456	3.85545	0.268653	14.351	1.04937e-46	1.71796e-45
RPS19	45846.7	0.728654	0.0507965	14.3446	1.15198e-46	1.8846e-45
SMNDC1	2310.95	0.89331	0.0622964	14.3397	1.23619e-46	2.02092e-45
ACCS	502.196	1.17689	0.0821688	14.3228	1.57707e-46	2.57634e-45
B4GALT5	4488.28	-0.677723	0.0473385	-14.3165	1.72575e-46	2.8172e-45
STK17A	720.196	0.980945	0.0685191	14.3164	1.72935e-46	2.82105e-45
RPL14	20166.8	0.619047	0.0432829	14.3023	2.11559e-46	3.44618e-45
KIAA0947	2138.1	-0.770389	0.0538984	-14.2934	2.40675e-46	3.91767e-45
RRM1	4760.2	-0.8443	0.0590963	-14.2868	2.64304e-46	4.29923e-45
HIRIP3	1141.67	-1.05958	0.0741679	-14.2862	2.66825e-46	4.33714e-45
PFDN1	1523.18	-0.851301	0.059662	-14.2687	3.42796e-46	5.56806e-45
RPS4X	38786.6	0.698688	0.0489687	14.2681	3.46119e-46	5.61803e-45
PRMT5	1406.63	-0.928255	0.0650848	-14.2622	3.7625e-46	6.10275e-45
XPO1	10455.6	-0.832051	0.0583526	-14.259	3.93896e-46	6.38443e-45
KANK1	291.216	-1.52661	0.107086	-14.2558	4.12347e-46	6.67873e-45
HDHD1	430.058	-1.40725	0.0987322	-14.2532	4.28077e-46	6.92858e-45
CHST2	256.427	1.86904	0.131206	14.245	4.81346e-46	7.78523e-45
PTPLAD1	3513.72	-0.745566	0.0523429	-14.2439	4.89294e-46	7.90817e-45
MPZL1	780.625	-1.21002	0.0849666	-14.2411	5.09043e-46	8.22154e-45
ARID5A	1065.81	2.74149	0.192784	14.2205	6.83655e-46	1.10339e-44
ZNF451	1398.11	0.943	0.0663196	14.219	6.98228e-46	1.12611e-44
BRAF	900.533	1.15429	0.0811918	14.2169	7.1984e-46	1.16014e-44
CKAP2	3163.28	-0.858591	0.0604047	-14.214	7.50268e-46	1.20833e-44
MFAP1	1303.15	-0.987074	0.0694451	-14.2137	7.53066e-46	1.21198e-44
SLBP	3924.06	-0.781504	0.054983	-14.2136	7.54812e-46	1.21393e-44
SNX20	1503.87	-0.801103	0.0563622	-14.2135	7.55664e-46	1.21445e-44
MIR3916	1264.67	1.07978	0.0760745	14.1937	1.00165e-45	1.60864e-44
ZNF654	831.022	1.10646	0.0779551	14.1936	1.00377e-45	1.61091e-44
NONO	15793.7	0.619269	0.0436437	14.1892	1.06876e-45	1.714e-44
TCP11L2	76.3576	3.82469	0.269592	14.187	1.10309e-45	1.76781e-44
STK36	330.76	1.43799	0.101438	14.1761	1.28756e-45	2.06199e-44
CEP55	1336.66	-0.876474	0.0618748	-14.1653	1.50251e-45	2.40454e-44
TNFAIP8L2	591.259	-1.19397	0.0843525	-14.1546	1.75032e-45	2.79917e-44
KDM1A	2776.16	-0.877151	0.0619896	-14.15	1.86815e-45	2.98551e-44
PAGR1	764.346	-1.72655	0.122028	-14.1487	1.90116e-45	3.03613e-44
ADH5	2242.19	-0.904696	0.0639722	-14.142	2.09194e-45	3.33846e-44
NUDCD1	1916.55	-0.908327	0.0642424	-14.1391	2.18161e-45	3.47913e-44
P2RX1	1877.83	0.898992	0.0635944	14.1363	2.26788e-45	3.61417e-44
VPS18	1166.21	-1.30206	0.0921748	-14.126	2.62771e-45	4.18468e-44
XRCC5	15092.8	-0.814442	0.0576747	-14.1213	2.80764e-45	4.46811e-44
ATP1B1	50.9571	4.76155	0.337283	14.1174	2.96796e-45	4.71994e-44
AC006129.1	73.545	3.50172	0.248095	14.1144	3.09685e-45	4.92148e-44
HOOK2	639.156	1.28429	0.0910045	14.1123	3.18882e-45	5.06412e-44
CENPB	3459.44	-1.4366	0.101805	-14.1113	3.23641e-45	5.13611e-44
HIST3H2A	155.198	3.17989	0.225364	14.11	3.2938e-45	5.22356e-44
CCR1	3165.6	-0.676066	0.0479329	-14.1044	3.56577e-45	5.65093e-44
ZNF706	2305.38	0.625935	0.044382	14.1033	3.62223e-45	5.73642e-44
SUV39H2	663.21	-1.13832	0.0807297	-14.1004	3.77783e-45	5.97868e-44
INO80D	1367.76	0.9923	0.070446	14.086	4.63329e-45	7.32741e-44
EMG1	1421.85	-0.886323	0.0629884	-14.0712	5.70849e-45	9.02156e-44
HLTF	1312.08	-1.06908	0.0760151	-14.0641	6.31325e-45	9.97038e-44
RMI1	604.483	-1.23987	0.0882048	-14.0567	7.00615e-45	1.1057e-43
STX11	164.363	2.10469	0.149747	14.055	7.18164e-45	1.13261e-43
PRRC2C	10439.8	0.749173	0.0533036	14.0548	7.19491e-45	1.13392e-43
FAM102B	1388.8	1.01757	0.0724333	14.0484	7.87606e-45	1.24041e-43
ZFP64	382.937	-1.53034	0.108934	-14.0483	7.89275e-45	1.24218e-43
METTL2B	840.649	-0.982425	0.0699415	-14.0464	8.10694e-45	1.27501e-43
GTF3C2	1860.85	-0.800294	0.0569935	-14.0419	8.64135e-45	1.35812e-43
C3	91.6304	2.95693	0.210925	14.0188	1.19549e-44	1.8776e-43
RPL41	11186	0.731903	0.0522456	14.0089	1.37537e-44	2.15863e-43
DCLRE1A	636.563	-1.31524	0.0939046	-14.0061	1.4297e-44	2.24236e-43
P2RY6	483.801	-1.52229	0.108701	-14.0044	1.46518e-44	2.29643e-43
CCAR2	4232.57	-0.642356	0.045893	-13.9968	1.63004e-44	2.55305e-43
SEPHS1	2383.34	-0.701684	0.0501367	-13.9954	1.66239e-44	2.60193e-43
CDK4	2869.26	-0.644976	0.0460929	-13.993	1.72116e-44	2.69207e-43
TUBA1B	6172.69	-0.643841	0.0460304	-13.9873	1.86359e-44	2.91285e-43
HIST1H2BD	69.7301	3.46178	0.247529	13.9853	1.91581e-44	2.99242e-43
UGP2	3561.21	-0.877012	0.0627165	-13.9837	1.9591e-44	3.05793e-43
POP7	668.842	-1.52064	0.108797	-13.9768	2.16006e-44	3.36931e-43
HECTD4	1679.03	0.704382	0.0504051	13.9744	2.23389e-44	3.48209e-43
NUP62	4881.69	-0.941879	0.0674386	-13.9665	2.49699e-44	3.88954e-43
MOAP1	609.975	1.0986	0.0787492	13.9506	3.11971e-44	4.85622e-43
PAG1	4958.18	0.809307	0.0580193	13.9489	3.19415e-44	4.9687e-43
ELP3	2267.61	-0.828107	0.0593803	-13.9458	3.33498e-44	5.18423e-43
SF3B3	7526.99	-0.778732	0.0558567	-13.9416	3.53936e-44	5.4982e-43
UQCR10	1336.44	-1.12235	0.0805364	-13.9359	3.83152e-44	5.94799e-43
NXPE3	527.843	-1.34991	0.0968912	-13.9323	4.03424e-44	6.25842e-43
RRP9	1556.67	-1.11347	0.0799814	-13.9216	4.68266e-44	7.2594e-43
CTD-3092A11.1	106.072	2.30346	0.16559	13.9106	5.46369e-44	8.46445e-43
MAP2K5	868.248	1.0138	0.0728853	13.9095	5.54827e-44	8.58964e-43
FBXW2	2138.16	-1.01651	0.0730868	-13.9083	5.63982e-44	8.72545e-43
YARS	9788.72	0.632497	0.0454792	13.9074	5.71171e-44	8.83068e-43
UBALD2	1750.46	1.31877	0.0948361	13.9058	5.83962e-44	9.02232e-43
KIAA0430	2660.53	0.823866	0.0592551	13.9037	6.01312e-44	9.28408e-43
IRGQ	1176.03	0.909364	0.0654371	13.8968	6.6268e-44	1.02247e-42
BDH1	907.949	-1.02028	0.0734801	-13.8851	7.79577e-44	1.20202e-42
KIAA0907	1918.65	0.900679	0.0648754	13.8832	8.00646e-44	1.23367e-42
CAMKK2	1926.51	-0.701211	0.0505198	-13.8799	8.38381e-44	1.29094e-42
RGS17P1	57.0005	3.6418	0.262499	13.8736	9.15694e-44	1.40903e-42
RAB2B	460.178	1.19167	0.0858953	13.8735	9.16948e-44	1.41001e-42
TMED10	14047.7	-0.783879	0.0565064	-13.8724	9.31055e-44	1.43074e-42
AC009506.1	467.98	1.35379	0.0976511	13.8635	1.05382e-43	1.61829e-42
TSC22D1	102.916	2.80584	0.202463	13.8586	1.12899e-43	1.73256e-42
UTP14A	1799.88	-0.905918	0.0654199	-13.8477	1.31287e-43	2.01339e-42
NSD1	5221.68	-0.650433	0.0469815	-13.8444	1.37455e-43	2.10656e-42
LYZ	6508.87	-0.752539	0.0543693	-13.8413	1.43673e-43	2.20037e-42
THBD	2554.33	-0.753078	0.0544237	-13.8373	1.51797e-43	2.32324e-42
PLEKHF2	850.62	1.04262	0.0753862	13.8303	1.67262e-43	2.5582e-42
CREBZF	1745.32	0.723854	0.0523443	13.8287	1.71071e-43	2.61471e-42
C5orf22	1139.49	-1.04842	0.0758232	-13.8272	1.74768e-43	2.66943e-42
EIF4ENIF1	771.006	-1.03821	0.0751443	-13.8162	2.03463e-43	3.10564e-42
PIGW	426.485	-1.4342	0.103832	-13.8127	2.13725e-43	3.26009e-42
AC079466.1	8318.06	-0.784276	0.0567836	-13.8117	2.16792e-43	3.30466e-42
SLC45A4	1249.35	-1.43865	0.104202	-13.8063	2.33549e-43	3.55772e-42
ATG4B	1951.86	1.24323	0.0900622	13.8041	2.40667e-43	3.6637e-42
APMAP	2330.79	-0.644387	0.0466811	-13.804	2.41022e-43	3.66666e-42
ZNF394	850.757	0.88133	0.0638824	13.7961	2.68879e-43	4.08772e-42
RPS23	9150.73	0.730105	0.0529264	13.7947	2.74138e-43	4.16488e-42
RPL30	13588.8	0.685805	0.0497471	13.7858	3.10096e-43	4.70805e-42
IL1RN	220.991	1.79793	0.130424	13.7852	3.12723e-43	4.74477e-42
SNRNP25	1446.05	-0.822195	0.059652	-13.7832	3.21721e-43	4.87805e-42
HMGCS1	1573.35	0.969168	0.0703185	13.7825	3.24614e-43	4.91864e-42
BET1L	1051.26	-0.909697	0.0660108	-13.781	3.31437e-43	5.01868e-42
LINC00861	49.1276	4.71358	0.342188	13.7748	3.61274e-43	5.46685e-42
GPR180	556.178	-1.29757	0.0942044	-13.774	3.65634e-43	5.52916e-42
HEXIM1	1674.36	0.981618	0.0712698	13.7733	3.69137e-43	5.57843e-42
GINS2	1189.31	-0.895178	0.0650061	-13.7707	3.82572e-43	5.77762e-42
MUL1	700.798	-1.1005	0.0799268	-13.7689	3.92402e-43	5.92216e-42
SPDYA	45.9638	4.469	0.324741	13.7617	4.33091e-43	6.5319e-42
RNASEH2A	2149.49	-0.760314	0.05526	-13.7588	4.50732e-43	6.79347e-42
ZNF266	1807.09	0.87762	0.0638201	13.7515	4.99037e-43	7.51656e-42
POLR3G	379.54	-1.43585	0.104428	-13.7496	5.1217e-43	7.70928e-42
C2CD2L	1073.56	0.942862	0.0686201	13.7403	5.82083e-43	8.75583e-42
CABLES2	491.458	-1.37244	0.0999023	-13.7378	6.02662e-43	9.05941e-42
ELAC2	3243.85	-0.614268	0.0447235	-13.7348	6.2822e-43	9.43738e-42
RP5-855D21.3	50.0417	4.24226	0.308998	13.7291	6.80006e-43	1.02086e-41
BLOC1S3	620.632	-1.1799	0.0859551	-13.7269	7.00197e-43	1.05048e-41
MTFR1	988.781	-1.03674	0.075542	-13.724	7.28894e-43	1.09281e-41
PA2G4	6204.45	-0.755057	0.0550389	-13.7186	7.85655e-43	1.17714e-41
BUB1B	3233.31	-0.735972	0.0536587	-13.7158	8.16583e-43	1.22268e-41
NRROS	3025.22	-1.37547	0.100314	-13.7117	8.64383e-43	1.2934e-41
CDC25A	1679.78	-0.899648	0.0656173	-13.7105	8.78025e-43	1.31295e-41
HMBOX1	712.774	1.08177	0.0789233	13.7066	9.27503e-43	1.38602e-41
B3GNT7	4206.04	-1.563	0.114043	-13.7053	9.43345e-43	1.40877e-41
VPS25	2226.24	-0.736264	0.0537359	-13.7015	9.94222e-43	1.48378e-41
ZBTB21	1011.24	1.08539	0.0792178	13.7014	9.96002e-43	1.48546e-41
PPP1R9B	3641.49	-1.0775	0.078646	-13.7006	1.00708e-42	1.50101e-41
LSM10	714.19	-1.30288	0.0951662	-13.6905	1.15637e-42	1.72239e-41
COPS2	4176.5	0.800764	0.0584979	13.6888	1.18503e-42	1.76392e-41
TSHZ1	980.441	-0.94957	0.0693703	-13.6884	1.19076e-42	1.77129e-41
CBR1	446.806	-1.2967	0.0947626	-13.6836	1.27155e-42	1.89024e-41
SEC24D	3236.9	-0.761468	0.0556491	-13.6834	1.27604e-42	1.89567e-41
CD99L2	1950.19	-0.708537	0.0517814	-13.6832	1.27855e-42	1.89817e-41
SLC9A3R1	3198.48	-0.847946	0.061972	-13.6827	1.28776e-42	1.9106e-41
MICAL1	3996.35	1.05053	0.0768582	13.6684	1.56841e-42	2.32547e-41
GLYR1	2653.01	-0.648804	0.047468	-13.6682	1.57136e-42	2.32832e-41
CHCHD4	665.508	-1.09905	0.0804368	-13.6636	1.67552e-42	2.48105e-41
TICRR	1053.72	-0.88026	0.0644492	-13.6582	1.80412e-42	2.66802e-41
C11orf21	1522.72	0.846295	0.0619914	13.6518	1.96941e-42	2.91057e-41
DUSP16	130.616	2.24767	0.164659	13.6504	2.00678e-42	2.96388e-41
DKC1	6524.51	-0.798114	0.0584689	-13.6502	2.0125e-42	2.97039e-41
MINA	527.388	-1.1643	0.0853313	-13.6445	2.17641e-42	3.21024e-41
PIGM	535.415	-1.27323	0.0933434	-13.6403	2.30563e-42	3.39864e-41
MRPS17	424.399	-1.30409	0.0956213	-13.6381	2.37619e-42	3.50038e-41
MFSD5	685.929	-1.17027	0.0858806	-13.6267	2.77786e-42	4.08945e-41
ICT1	966.612	-0.986552	0.0724238	-13.6219	2.96632e-42	4.36407e-41
MARCKS	53.3288	3.70338	0.271994	13.6157	3.23107e-42	4.75051e-41
TFCP2	2161.91	-0.817239	0.0600352	-13.6127	3.36723e-42	4.94751e-41
STAG2	6571.3	0.879567	0.06465	13.6051	3.73633e-42	5.48629e-41
TNKS	1861.95	0.915963	0.0673269	13.6047	3.7546e-42	5.50957e-41
RP11-888D10.4	47.096	4.07493	0.299576	13.6023	3.88047e-42	5.6906e-41
IKBIP	680.748	-1.13021	0.0830985	-13.6009	3.95597e-42	5.79759e-41
NSL1	754.468	-1.1476	0.0843881	-13.5991	4.05632e-42	5.94084e-41
PSMB2	3371.31	-0.650326	0.0478241	-13.5983	4.10005e-42	6.00103e-41
TDP2	1556.16	-0.822368	0.0604772	-13.598	4.11687e-42	6.02179e-41
NDUFAF1	706.142	-1.03032	0.07579	-13.5943	4.32624e-42	6.32397e-41
KIFC1	2420.06	-0.893668	0.065753	-13.5913	4.51073e-42	6.58943e-41
VWA8	1397.57	0.958863	0.0705564	13.59	4.59001e-42	6.70094e-41
MT-ND3	15933.7	0.826266	0.0608117	13.5873	4.76469e-42	6.9515e-41
NOL8	2547.83	-1.07158	0.0788762	-13.5856	4.87312e-42	7.10516e-41
ZNF576	291.069	-1.41742	0.104389	-13.5783	5.38455e-42	7.84581e-41
MRPL15	2370.45	-0.606822	0.0447326	-13.5656	6.40902e-42	9.33259e-41
ACTB	94658.2	-0.909008	0.0670138	-13.5645	6.50222e-42	9.46227e-41
COL4A3BP	1619.63	0.925012	0.0682216	13.5589	7.01607e-42	1.02035e-40
C12orf65	401.483	-1.38811	0.102397	-13.5561	7.29212e-42	1.05982e-40
TBC1D14	982.682	-0.952669	0.0702847	-13.5544	7.45857e-42	1.08263e-40
RRM2	8808.02	-0.701413	0.0517898	-13.5435	8.66112e-42	1.25639e-40
VANGL1	501.303	-1.25515	0.0926816	-13.5426	8.76807e-42	1.27109e-40
ERCC6L	233.492	-1.77603	0.131169	-13.54	9.07974e-42	1.31544e-40
CDC23	1690.47	-0.865455	0.0639358	-13.5363	9.54419e-42	1.38185e-40
MRPL24	1632.49	-0.772569	0.0570768	-13.5356	9.63847e-42	1.39461e-40
MRPL20	1504.85	-0.786408	0.0581234	-13.53	1.04044e-41	1.50448e-40
THRAP3	5524.91	-0.684276	0.0505775	-13.5293	1.05087e-41	1.5186e-40
CUTC	885.108	-1.12516	0.0831831	-13.5263	1.09443e-41	1.58054e-40
PSMD3	4099.65	-0.597517	0.0441751	-13.5261	1.09711e-41	1.5834e-40
INSR	2840.75	0.632784	0.046786	13.5251	1.11209e-41	1.60402e-40
METTL16	1928.14	-0.755498	0.0559091	-13.513	1.31148e-41	1.8904e-40
ZMYND8	1494.68	-0.764434	0.0565771	-13.5114	1.3403e-41	1.93072e-40
ARG2	41.9154	4.57607	0.338774	13.5077	1.40767e-41	2.02649e-40
TRIAP1	1266.09	-0.948055	0.0701987	-13.5053	1.455e-41	2.09331e-40
F3	1568.19	0.79836	0.0591458	13.4982	1.60317e-41	2.30358e-40
HEY1	42.4702	4.42764	0.328018	13.4982	1.60297e-41	2.30358e-40
TDP1	1854.81	-0.939109	0.0695815	-13.4965	1.63896e-41	2.35351e-40
FARSA	4707.86	-1.45985	0.108179	-13.4948	1.67902e-41	2.40952e-40
ATP6V0D1	2526.53	-0.763383	0.0566179	-13.4831	1.9671e-41	2.82115e-40
KAZN	986.618	-1.01434	0.0752346	-13.4824	1.98547e-41	2.84572e-40
IMP3	1256.86	-0.876348	0.0650115	-13.4799	2.0541e-41	2.94223e-40
TSFM	570.014	-1.25064	0.0928221	-13.4735	2.24046e-41	3.20715e-40
ZNF672	679.135	-1.28282	0.0952154	-13.4728	2.25973e-41	3.2327e-40
ZSWIM4	223.439	2.38887	0.177383	13.4674	2.43446e-41	3.48048e-40
GBAS	972.61	-1.01631	0.0754793	-13.4648	2.51946e-41	3.59974e-40
CTD-2306M10.1	233.974	-1.91033	0.141891	-13.4633	2.57003e-41	3.66971e-40
ZNF584	368.977	-1.42455	0.105813	-13.4629	2.58553e-41	3.68953e-40
ZHX3	956.674	-0.938009	0.0696844	-13.4608	2.65994e-41	3.79332e-40
KIAA0100	7068.44	-0.636524	0.0473188	-13.4518	3.00321e-41	4.28019e-40
SCOC	891.164	-1.12616	0.0837626	-13.4446	3.31019e-41	4.71474e-40
TANK	950.733	1.0134	0.0753808	13.4438	3.34817e-41	4.76586e-40
DCAF4	489.281	-1.14199	0.0850506	-13.4272	4.18777e-41	5.95725e-40
H3F3A	823.864	0.894992	0.0666796	13.4223	4.47697e-41	6.36467e-40
PRADC1	548.288	-1.06485	0.0793501	-13.4196	4.64053e-41	6.59308e-40
RIOK3	2430.46	0.916091	0.0682935	13.414	5.00369e-41	7.10461e-40
LETM1	2390.24	-0.888025	0.0662192	-13.4104	5.25592e-41	7.45811e-40
DSCC1	980.925	-1.17866	0.087892	-13.4103	5.26146e-41	7.46132e-40
SAP18	5643.91	0.727261	0.0542351	13.4094	5.3262e-41	7.54843e-40
RBM15B	2259.34	-0.858676	0.0640438	-13.4076	5.45467e-41	7.72569e-40
PAAF1	554.607	-1.17467	0.0876272	-13.4053	5.63197e-41	7.97185e-40
KCMF1	1705.94	0.837135	0.0624632	13.4021	5.8811e-41	8.31933e-40
PPP1R2	1177.87	0.926398	0.0691316	13.4005	6.00627e-41	8.49112e-40
MANEAL	443.236	-1.52404	0.113735	-13.3999	6.05212e-41	8.55064e-40
HS6ST1	551.52	-1.53561	0.114612	-13.3983	6.18407e-41	8.72624e-40
RP11-473I1.5	106.865	2.30265	0.171861	13.3983	6.18324e-41	8.72624e-40
ALDH3A2	949.737	-0.943365	0.0704217	-13.3959	6.38587e-41	9.00542e-40
ALDH1L2	5586.76	0.837298	0.0625113	13.3943	6.52463e-41	9.19541e-40
ZNF74	411.988	-1.37512	0.102693	-13.3906	6.866e-41	9.67054e-40
TMEM184C	1486.96	-0.869394	0.0649269	-13.3903	6.88584e-41	9.69249e-40
METTL8	653.886	-1.07953	0.0806277	-13.3891	7.00676e-41	9.85661e-40
APBB3	337.043	1.32832	0.0992213	13.3874	7.16193e-41	1.00687e-39
FAM126B	1327.49	1.00192	0.0748569	13.3845	7.45341e-41	1.0472e-39
DUSP11	597.64	-1.2853	0.0960696	-13.3788	8.0391e-41	1.12879e-39
EMC2	1062.24	-0.952512	0.0711991	-13.3781	8.11526e-41	1.13879e-39
NOLC1	9350.71	-0.672705	0.0503077	-13.3718	8.83501e-41	1.23902e-39
AK2	13659	-0.675099	0.0504962	-13.3693	9.13692e-41	1.28057e-39
MCAT	630.024	-1.06964	0.0800515	-13.3619	1.00961e-40	1.41327e-39
TMEM70	1830.42	0.609967	0.0456497	13.3619	1.00934e-40	1.41327e-39
RPS25	18702.1	0.679331	0.0508454	13.3607	1.02576e-40	1.435e-39
YWHAZ	24494.6	0.740526	0.0554278	13.3602	1.03314e-40	1.44444e-39
GPRC5C	186.616	2.26162	0.169388	13.3518	1.15695e-40	1.61654e-39
SMAD7	361.654	1.33571	0.100086	13.3455	1.2578e-40	1.7553e-39
DIS3L	1371	-0.855105	0.0640752	-13.3453	1.26106e-40	1.75769e-39
MCCC2	2780.58	-0.665334	0.0498551	-13.3453	1.26078e-40	1.75769e-39
DNAJC5	3112.59	-0.912211	0.0683642	-13.3434	1.2942e-40	1.80278e-39
UFM1	2850.01	0.795062	0.059624	13.3346	1.45653e-40	2.02642e-39
SLC35B4	1059.69	-1.05046	0.0788211	-13.3272	1.60841e-40	2.23501e-39
PAXIP1	849.837	-0.9649	0.0724068	-13.3261	1.63234e-40	2.26687e-39
SNHG1	5436.65	0.716164	0.0537497	13.3241	1.67737e-40	2.328e-39
NIF3L1	890.424	-1.03095	0.077413	-13.3175	1.83053e-40	2.53901e-39
TRAM2	1016.2	-0.812951	0.0610657	-13.3127	1.95179e-40	2.70391e-39
ZNF367	1080.25	-0.963048	0.0723403	-13.3127	1.95168e-40	2.70391e-39
C9orf69	1545.23	-1.53179	0.115084	-13.3102	2.01978e-40	2.7964e-39
ERLIN2	3314.67	-0.840125	0.0631327	-13.3073	2.09939e-40	2.90485e-39
TMEM67	130.446	2.03553	0.152975	13.3063	2.12634e-40	2.94036e-39
CXCL10	44.0217	5.57167	0.418886	13.3012	2.27923e-40	3.14987e-39
CDK17	748.512	1.05212	0.0791371	13.2949	2.47774e-40	3.42213e-39
ATIC	4052.03	-0.648929	0.048818	-13.2928	2.54787e-40	3.51687e-39
NANP	361.089	-1.47154	0.110723	-13.2903	2.63439e-40	3.63408e-39
MIS18A	752.031	-1.06091	0.0798892	-13.2798	3.03336e-40	4.18193e-39
ZNF627	622.891	-1.32149	0.0995467	-13.275	3.23113e-40	4.45189e-39
GDI1	1450.78	0.710861	0.0535581	13.2727	3.33319e-40	4.5873e-39
PGM2L1	77.8079	2.60664	0.196391	13.2727	3.33344e-40	4.5873e-39
TTLL3	432.559	1.21683	0.0916904	13.2711	3.40733e-40	4.68616e-39
CAPZA2	2738.22	0.939399	0.0708037	13.2677	3.56558e-40	4.90085e-39
ZW10	1115	-1.05453	0.0795181	-13.2615	3.87266e-40	5.31971e-39
POLR3K	592.71	-1.05649	0.079691	-13.2574	4.08993e-40	5.61479e-39
WT1	715.16	-0.939236	0.0708552	-13.2557	4.18184e-40	5.73751e-39
BUB1	4654.84	-0.722841	0.0545386	-13.2537	4.29261e-40	5.88594e-39
KMT2C	3324.62	0.788839	0.059526	13.252	4.39251e-40	6.0193e-39
HEATR5B	1625.7	0.887577	0.0670167	13.2441	4.87992e-40	6.67919e-39
MT1M	65.4327	2.97455	0.224603	13.2436	4.91299e-40	6.72041e-39
B3GALT6	1091.04	-1.15953	0.087588	-13.2384	5.26425e-40	7.19658e-39
ASH1L	2377.03	0.926225	0.0699804	13.2355	5.47403e-40	7.47887e-39
RN7SL1	677.477	1.75203	0.132396	13.2332	5.64076e-40	7.70205e-39
ZADH2	1122.84	-0.882042	0.0666885	-13.2263	6.18575e-40	8.44114e-39
RBM12	4615.14	-0.699925	0.0529195	-13.2262	6.19155e-40	8.444e-39
TTC1	1961.84	-0.929387	0.0702697	-13.226	6.21054e-40	8.46483e-39
SPAG1	337.558	1.26284	0.0955604	13.2151	7.18154e-40	9.78244e-39
GPAM	312.908	-1.42019	0.107481	-13.2134	7.34298e-40	9.99637e-39
EXOSC7	832.725	-0.947771	0.0717449	-13.2103	7.65396e-40	1.04135e-38
PKIG	67.1997	3.21266	0.243333	13.2027	8.46055e-40	1.1504e-38
ZNF629	556.033	-1.2024	0.0911092	-13.1974	9.08383e-40	1.23442e-38
PTS	258.104	1.48079	0.112268	13.1898	1.00462e-39	1.36438e-38
EXOSC9	1517.72	-0.843883	0.0639849	-13.1888	1.01814e-39	1.38191e-38
CAMK2D	1417.29	0.889951	0.067546	13.1755	1.2144e-39	1.64731e-38
PAPLN	273.363	1.64291	0.124762	13.1684	1.33427e-39	1.80885e-38
ECE2	443.562	-1.41733	0.107637	-13.1676	1.34764e-39	1.82589e-38
SLC6A9	552.112	1.69483	0.128766	13.1621	1.45035e-39	1.96388e-38
LDHA	19707.9	-0.751409	0.0571076	-13.1578	1.53512e-39	2.07743e-38
PARL	2607.84	-0.669693	0.0509209	-13.1516	1.66523e-39	2.25217e-38
SHMT1	713.117	-1.07564	0.0817911	-13.1511	1.67687e-39	2.26656e-38
EIF2D	2059.9	0.663748	0.0504887	13.1465	1.78301e-39	2.40859e-38
TACO1	499.336	-1.16519	0.0886661	-13.1413	1.90829e-39	2.57631e-38
PRCC	1741.4	-0.746293	0.0567975	-13.1395	1.9542e-39	2.63673e-38
KIF11	3707.79	-0.821673	0.0625493	-13.1364	2.03677e-39	2.7465e-38
RNASEH1	778.154	-0.977638	0.0744257	-13.1357	2.05462e-39	2.76894e-38
GOSR1	1876.7	-0.754765	0.0574615	-13.1351	2.07111e-39	2.78951e-38
TOP2A	16919.2	-0.784587	0.0597585	-13.1293	2.23754e-39	3.01188e-38
NEIL2	389.246	-1.43922	0.109625	-13.1286	2.25911e-39	3.03913e-38
RPP40	532.584	-1.18568	0.0903167	-13.1281	2.27437e-39	3.05785e-38
SEC23B	3257.94	-0.734632	0.0559919	-13.1203	2.51799e-39	3.3834e-38
ITGB1	3534.04	0.746897	0.0569329	13.1189	2.56644e-39	3.44648e-38
NUDT21	6534.47	-0.619024	0.047211	-13.1118	2.81656e-39	3.78013e-38
RPL23	26276.6	0.622961	0.0475132	13.1113	2.83617e-39	3.8042e-38
ZFC3H1	2389.6	0.765343	0.0583743	13.111	2.84946e-39	3.81978e-38
COMMD8	1113.17	-1.06936	0.0815654	-13.1105	2.86626e-39	3.84005e-38
TRIM26	908.662	-0.964112	0.0735467	-13.1088	2.93035e-39	3.9236e-38
ZNF507	1415.04	-0.994632	0.0759014	-13.1043	3.11322e-39	4.16602e-38
RPL23A	8374.84	0.629531	0.0480696	13.0963	3.45922e-39	4.62631e-38
RPL24	15961.9	0.661223	0.0504913	13.0958	3.48034e-39	4.65182e-38
EPDR1	306.673	-1.67735	0.128105	-13.0936	3.58236e-39	4.78537e-38
TRMT10C	1634.42	-0.897816	0.068571	-13.0932	3.59952e-39	4.80547e-38
GOT1	916.397	0.985509	0.0752831	13.0907	3.7214e-39	4.96527e-38
SNAP47	356.871	-1.449	0.110713	-13.0879	3.86356e-39	5.15194e-38
NDUFAB1	1411.23	-0.747801	0.0571402	-13.0871	3.90097e-39	5.19879e-38
PPP2CA	5626.43	0.753676	0.0576259	13.0788	4.35364e-39	5.79866e-38
TOMM7	3290.66	0.726535	0.0555857	13.0705	4.85236e-39	6.45913e-38
SETX	4858.37	0.750651	0.057447	13.0668	5.09333e-39	6.77595e-38
NPIPA1	232.019	1.59619	0.122253	13.0565	5.83704e-39	7.74725e-38
NT5DC2	3070.8	-0.811716	0.062213	-13.0474	6.57773e-39	8.72525e-38
FAM213B	429.48	-1.50007	0.114992	-13.045	6.78551e-39	8.99563e-38
TMED2	7403.03	-0.689024	0.052837	-13.0406	7.19319e-39	9.53055e-38
RP11-448A19.1	151.072	1.84484	0.14153	13.035	7.73303e-39	1.02399e-37
PSMD13	3658.59	-0.588202	0.045152	-13.0272	8.57481e-39	1.13479e-37
NCAPH	2039.48	-0.781941	0.0600458	-13.0224	9.12468e-39	1.20686e-37
RP11-773D16.1	146.24	1.96203	0.150687	13.0205	9.35485e-39	1.23659e-37
SAFB	4643.11	0.634878	0.0487651	13.0191	9.52822e-39	1.25878e-37
FCGR1A	1142.56	0.861433	0.0662274	13.0072	1.11361e-38	1.47034e-37
CDCA2	1856.49	-0.757914	0.058301	-13	1.22318e-38	1.61407e-37
USP10	3222.08	-0.690014	0.0530828	-12.9988	1.24218e-38	1.6382e-37
RP13-516M14.1	103.985	2.20081	0.16936	12.9949	1.30793e-38	1.72392e-37
CNOT11	1807.46	-0.856071	0.0658821	-12.994	1.32371e-38	1.7437e-37
NDUFAF6	567.758	-1.09776	0.0845573	-12.9825	1.53807e-38	2.02491e-37
ZNF267	1381.77	0.914129	0.0704146	12.9821	1.54583e-38	2.03395e-37
DNAJC14	561.284	-1.14507	0.0882084	-12.9815	1.55898e-38	2.05006e-37
ATP6V1C1	2348.29	-0.77763	0.0599061	-12.9808	1.57193e-38	2.0659e-37
TXNL1	3323.41	0.628929	0.0484622	12.9777	1.63643e-38	2.14943e-37
PODXL2	986.514	-1.27992	0.0986283	-12.9772	1.64724e-38	2.16238e-37
KLHL6	820.932	0.924654	0.0712659	12.9747	1.70268e-38	2.23388e-37
C5orf51	1150.65	-1.0489	0.0808892	-12.9671	1.88076e-38	2.46609e-37
ZYG11B	556.742	-1.28762	0.099374	-12.9573	2.13731e-38	2.80088e-37
RAB8B	699.936	1.08768	0.0839635	12.9542	2.22561e-38	2.91491e-37
TRMU	1186.08	-0.862938	0.0666723	-12.943	2.57431e-38	3.36967e-37
NOA1	1215.37	0.818989	0.0633057	12.9371	2.78065e-38	3.63768e-37
SUV420H1	1500.94	0.868405	0.067136	12.935	2.85603e-38	3.73413e-37
PALD1	414.162	-1.40676	0.108829	-12.9263	3.19658e-38	4.177e-37
NMI	2580.19	-0.887964	0.0687219	-12.9211	3.42138e-38	4.46818e-37
PTOV1	1040.98	1.28805	0.0997145	12.9173	3.59414e-38	4.69111e-37
MNDA	211.823	-1.94545	0.150635	-12.915	3.70353e-38	4.83112e-37
RBBP7	4068.33	-0.610371	0.047274	-12.9113	3.88537e-38	5.06543e-37
ERAL1	1266.39	-0.7899	0.0612532	-12.8956	4.76303e-38	6.2061e-37
RP4-717I23.3	483.299	1.11248	0.0862739	12.8947	4.82193e-38	6.27926e-37
MAP2K3	1867.96	0.917414	0.0711654	12.8913	5.03933e-38	6.55861e-37
CCNT2	1565.99	0.9512	0.073794	12.8899	5.12884e-38	6.6713e-37
TOX4	2513.04	0.791765	0.0614358	12.8877	5.28023e-38	6.86429e-37
WSB2	1017.79	-0.947821	0.0735645	-12.8842	5.52287e-38	7.17564e-37
BLM	2003	-0.781196	0.060642	-12.8821	5.67784e-38	7.37278e-37
KCNK10	471.983	-1.15549	0.0897076	-12.8806	5.78905e-38	7.5129e-37
RPS9	30771.6	0.928907	0.0721542	12.8739	6.31268e-38	8.18781e-37
MT1X	233.742	1.56666	0.121707	12.8724	6.43936e-38	8.34736e-37
SNORD14E	43.3479	4.1055	0.319004	12.8698	6.65999e-38	8.62845e-37
CEP57	2855.93	0.795224	0.0618095	12.8657	7.01952e-38	9.08908e-37
MRPL44	1553.39	0.70084	0.0544949	12.8606	7.49548e-38	9.69986e-37
THNSL1	335.57	-1.55449	0.120874	-12.8604	7.52339e-38	9.73045e-37
EIF4EBP2	5546.62	-0.743098	0.0577866	-12.8593	7.62179e-38	9.85212e-37
CCNB2	2636.94	-0.726454	0.0565412	-12.8482	8.80145e-38	1.13705e-36
GINS3	538.503	-1.095	0.0852442	-12.8455	9.11859e-38	1.17736e-36
METTL2A	529.059	-1.16003	0.0903238	-12.8431	9.4087e-38	1.21413e-36
INTS9	1320.63	-0.812091	0.0632883	-12.8316	1.09067e-37	1.40663e-36
ATG2B	935.929	0.964912	0.0752268	12.8267	1.16191e-37	1.49767e-36
MSRB1	623.092	-1.39444	0.10876	-12.8212	1.2468e-37	1.60619e-36
KIAA2013	1456.86	-1.31952	0.102922	-12.8206	1.25793e-37	1.6196e-36
IFNAR1	2015.08	-0.807212	0.0629665	-12.8197	1.27184e-37	1.63659e-36
STX16	1803.33	0.800699	0.0624678	12.8178	1.30351e-37	1.67639e-36
C12orf29	520.93	-1.23548	0.0964411	-12.8107	1.42843e-37	1.83602e-36
MLXIPL	380.141	1.36135	0.106306	12.806	1.51781e-37	1.94979e-36
FANCF	212.028	-1.93684	0.151351	-12.797	1.7039e-37	2.18761e-36
NAMPTL	96.8177	2.27061	0.177489	12.793	1.79511e-37	2.30212e-36
FAM175B	1055.13	-0.971676	0.0759736	-12.7897	1.87314e-37	2.40085e-36
DCLRE1B	623.061	-1.03179	0.0807286	-12.7809	2.09587e-37	2.68481e-36
MTCH2	2798.12	-0.647449	0.0506749	-12.7765	2.21769e-37	2.83921e-36
TMEM229B	199.844	-1.95385	0.152926	-12.7765	2.21889e-37	2.83921e-36
SREK1	3440.38	0.774576	0.0606446	12.7724	2.33884e-37	2.99101e-36
VPS33A	421.322	-1.25929	0.0986162	-12.7696	2.42269e-37	3.09651e-36
FRY	2550.76	0.595693	0.0466603	12.7666	2.51946e-37	3.21839e-36
HYAL2	155.962	-2.12396	0.166384	-12.7654	2.55917e-37	3.26728e-36
ZC3HC1	651.714	-0.968261	0.0758654	-12.7629	2.64206e-37	3.37121e-36
MZF1	631.463	1.16868	0.0916219	12.7555	2.9042e-37	3.70363e-36
BMS1	3095.4	-0.685616	0.0537948	-12.745	3.32303e-37	4.23538e-36
KPNA4	4881.44	0.843627	0.0662114	12.7414	3.48004e-37	4.43302e-36
MAPRE2	1200.58	0.834591	0.0655148	12.739	3.59071e-37	4.57144e-36
TCOF1	2752.37	-0.879731	0.069073	-12.7363	3.71818e-37	4.73108e-36
PHIP	3141.25	0.768344	0.0603338	12.7349	3.78346e-37	4.80877e-36
SEH1L	3484.74	-0.747404	0.0586894	-12.7349	3.7829e-37	4.80877e-36
CITED2	4363.16	0.848749	0.0666984	12.7252	4.28467e-37	5.44277e-36
GLCE	869.403	-1.04143	0.0818576	-12.7225	4.43704e-37	5.63319e-36
POP4	1527.13	-0.687787	0.0541046	-12.7122	5.06126e-37	6.42211e-36
TOR1AIP2	1539.42	0.777185	0.0611443	12.7107	5.1598e-37	6.54351e-36
TUSC2	771.186	-0.901223	0.0709087	-12.7096	5.22849e-37	6.62692e-36
CTD-2547E10.2	85.7448	2.27311	0.17887	12.7082	5.32548e-37	6.7461e-36
DNAJB9	986.529	1.05631	0.0831965	12.6966	6.17871e-37	7.82259e-36
CCDC71L	194.83	1.77161	0.139593	12.6913	6.61006e-37	8.36406e-36
PHF8	1651.31	0.670597	0.052853	12.688	6.89508e-37	8.71987e-36
RNF8	541.559	-1.06396	0.0838606	-12.6872	6.96375e-37	8.80183e-36
DGCR2	1757.06	-1.3202	0.104144	-12.6767	7.96222e-37	1.00583e-35
PSMB5	1559.08	-0.716215	0.0564997	-12.6765	7.98643e-37	1.00833e-35
ZCCHC14	934.772	0.802338	0.0633054	12.6741	8.23154e-37	1.0387e-35
ECHDC1	3171.59	-0.762895	0.0602006	-12.6725	8.39568e-37	1.05882e-35
ZNF596	97.8001	2.4999	0.197293	12.671	8.55758e-37	1.07864e-35
RAD18	1078.24	-0.807619	0.0637439	-12.6697	8.69994e-37	1.09598e-35
MTHFD1	3955.16	-0.771495	0.0609184	-12.6644	9.31168e-37	1.1724e-35
BCL7A	964.872	-0.84009	0.0663701	-12.6577	1.01473e-36	1.2769e-35
NCBP2-AS2	583.328	-1.07184	0.0847006	-12.6544	1.05749e-36	1.32998e-35
FAM220A	419.378	-1.33215	0.10531	-12.6498	1.12114e-36	1.40925e-35
IFT20	320.091	1.37291	0.108552	12.6476	1.15416e-36	1.44995e-35
ZC3H13	3486.89	-0.804771	0.0636741	-12.6389	1.28821e-36	1.61746e-35
DIMT1	1794.66	-0.793121	0.0627661	-12.6361	1.33449e-36	1.67466e-35
GNL3	6370.15	0.701615	0.0555376	12.6332	1.38601e-36	1.73835e-35
DDX31	845.98	-0.874679	0.0692763	-12.626	1.5189e-36	1.90397e-35
MINPP1	309.636	-1.48954	0.11799	-12.6243	1.55091e-36	1.94303e-35
STX1A	334.276	1.68527	0.133542	12.6198	1.64286e-36	2.0571e-35
HYLS1	579.483	-1.16728	0.0925028	-12.6189	1.66183e-36	2.0797e-35
NDUFAF4	711.674	-0.943599	0.0747961	-12.6156	1.73207e-36	2.16641e-35
CRY1	433.859	1.06919	0.084783	12.6109	1.83993e-36	2.30007e-35
SOX12	330.118	-1.64837	0.130715	-12.6104	1.85008e-36	2.31148e-35
KIAA1109	1459.05	1.01451	0.0805048	12.6019	2.06056e-36	2.57304e-35
XPO4	2647.46	-0.742189	0.0589125	-12.5982	2.16123e-36	2.69728e-35
MKLN1	1591.53	0.901811	0.0716169	12.5921	2.33263e-36	2.9096e-35
CLK4	668.811	1.06718	0.0847651	12.5898	2.40138e-36	2.99372e-35
TCEB1	3692.5	0.791596	0.0628855	12.5879	2.46148e-36	3.06695e-35
RSL24D1	8189.33	0.790704	0.0628208	12.5867	2.50042e-36	3.11377e-35
SERTAD3	592.882	0.990771	0.0787536	12.5806	2.69831e-36	3.35838e-35
NAP1L1	21468.9	0.632874	0.0503317	12.5741	2.93265e-36	3.64804e-35
ASB8	865.055	-1.00464	0.0799044	-12.573	2.97216e-36	3.69517e-35
PDIK1L	503.109	-1.37104	0.109049	-12.5727	2.9826e-36	3.70613e-35
DFNB31	60.3687	7.31601	0.581942	12.5717	3.02099e-36	3.75179e-35
MPV17L2	502.568	-1.18792	0.0944991	-12.5707	3.06058e-36	3.79888e-35
LPP	664.284	1.04441	0.0831403	12.5621	3.41276e-36	4.23371e-35
KIF20A	1725.11	-0.725323	0.0577426	-12.5613	3.44533e-36	4.2718e-35
SLC30A6	1284.78	-1.02634	0.0817144	-12.5601	3.49733e-36	4.33391e-35
ZNF639	697.39	-1.23485	0.0983464	-12.5561	3.67984e-36	4.5576e-35
PBK	1386.7	-0.903454	0.0719625	-12.5545	3.75448e-36	4.64752e-35
UPP1	185.827	1.8732	0.149225	12.5529	3.83149e-36	4.74027e-35
RSF1	1721.31	0.75785	0.0603854	12.5502	3.96445e-36	4.90211e-35
TADA2B	912.634	-0.931687	0.07428	-12.5429	4.34753e-36	5.37288e-35
PROSER1	1567.75	-0.72756	0.05802	-12.5398	4.51973e-36	5.58266e-35
AC083843.1	298.248	1.29864	0.103608	12.5341	4.85539e-36	5.99077e-35
SRPK1	2837.01	-0.667528	0.0532739	-12.5301	5.10985e-36	6.30132e-35
MMP15	251.424	-1.95308	0.155912	-12.5268	5.32388e-36	6.56171e-35
AP001816.1	124.858	2.46964	0.197262	12.5196	5.83232e-36	7.18447e-35
DOCK11	3462.29	0.79811	0.0637693	12.5156	6.13538e-36	7.55371e-35
MED29	1978.53	-0.67829	0.0542024	-12.514	6.25683e-36	7.69908e-35
VDAC3	7718.52	-0.717256	0.0573319	-12.5106	6.53449e-36	8.03206e-35
RNU2-59P	42.7561	6.27295	0.501461	12.5094	6.6365e-36	8.15306e-35
NACA	24496.6	0.588079	0.0470153	12.5082	6.73023e-36	8.26375e-35
TEF	187.193	-1.71662	0.137257	-12.5066	6.87289e-36	8.43438e-35
FTSJ1	1295.78	-0.890123	0.0711734	-12.5064	6.8865e-36	8.44652e-35
RPL6	29216.1	0.623912	0.0499175	12.4989	7.57352e-36	9.28418e-35
CBL	3413.15	0.666675	0.0533392	12.4988	7.57874e-36	9.28559e-35
VPS72	1222	-0.794064	0.0635442	-12.4963	7.82524e-36	9.58245e-35
ZNRF3	382.208	-1.21176	0.0969751	-12.4955	7.89626e-36	9.66422e-35
AKAP13	1586.88	0.79227	0.0634109	12.4942	8.02777e-36	9.8199e-35
FAM53B	1826.82	-1.2309	0.098522	-12.4936	8.0877e-36	9.88791e-35
IST1	3983.02	0.707713	0.0567119	12.4791	9.70826e-36	1.18628e-34
POLE3	4598.91	-0.670008	0.0536949	-12.4781	9.83586e-36	1.20123e-34
GTF3C4	1703.81	-0.809477	0.064919	-12.469	1.10156e-35	1.34387e-34
KIAA0391	831.675	-0.958957	0.0769187	-12.4672	1.12777e-35	1.37511e-34
HIST1H1C	180.735	1.54723	0.124107	12.4669	1.1308e-35	1.37806e-34
IGBP1	1545.98	0.780174	0.0625859	12.4656	1.14945e-35	1.40005e-34
THOC3	456.204	-1.25147	0.100408	-12.4639	1.17533e-35	1.4308e-34
KEAP1	3423.51	-1.04699	0.0840264	-12.4603	1.22945e-35	1.49509e-34
EPC1	1153.35	0.953712	0.0765527	12.4582	1.26134e-35	1.53304e-34
CX3CR1	225.483	-2.58674	0.20765	-12.4572	1.2779e-35	1.55235e-34
AHI1	339.509	1.27926	0.102729	12.4528	1.35086e-35	1.64011e-34
XKR6	126.127	1.86719	0.149993	12.4486	1.42407e-35	1.72807e-34
NPC1	1064.86	0.793569	0.0637819	12.4419	1.54737e-35	1.87669e-34
KIT	1172.01	-1.02472	0.082396	-12.4366	1.65446e-35	2.00444e-34
CHKA	1424.88	0.776139	0.0624673	12.4247	1.91896e-35	2.32119e-34
CD109	45.3266	3.65022	0.293959	12.4175	2.10131e-35	2.53907e-34
CASP2	2574.41	-0.689462	0.0555266	-12.4168	2.11918e-35	2.5593e-34
NUP35	627.882	-1.16263	0.0936423	-12.4157	2.14873e-35	2.59362e-34
CTNNAL1	299.38	1.39548	0.112438	12.4111	2.27618e-35	2.746e-34
PNPT1	2765.37	-0.662874	0.0534331	-12.4057	2.43417e-35	2.93505e-34
PHYKPL	979.467	0.907881	0.0731942	12.4037	2.49475e-35	3.0065e-34
PDK1	1050.57	0.78081	0.0629549	12.4027	2.52724e-35	3.04404e-34
YY1AP1	1881.25	0.712283	0.0574315	12.4023	2.53917e-35	3.0568e-34
CDC42SE1	3954.23	0.700312	0.0564719	12.4011	2.57824e-35	3.1022e-34
SURF6	1258.43	-1.25144	0.100927	-12.3995	2.63095e-35	3.16394e-34
NOP14	2554.98	-0.660793	0.0532997	-12.3977	2.68997e-35	3.23322e-34
REXO4	1888.66	-0.795078	0.0641569	-12.3927	2.86169e-35	3.4378e-34
GNE	835.972	-0.971878	0.0784372	-12.3905	2.94149e-35	3.5318e-34
C9orf41	605.936	-1.07971	0.0871797	-12.3848	3.15778e-35	3.7895e-34
PNO1	1306.19	-0.838541	0.0677698	-12.3734	3.64206e-35	4.36837e-34
PDCD5	2498.27	-0.649586	0.052502	-12.3726	3.67698e-35	4.40793e-34
JKAMP	1202	-1.12745	0.0911313	-12.3717	3.71939e-35	4.45642e-34
RP11-1407O15.2	194.805	1.56371	0.126405	12.3706	3.76788e-35	4.51215e-34
CTC-459F4.1	125.981	2.40556	0.194506	12.3676	3.91427e-35	4.685e-34
CLECL1	360.94	1.15449	0.0933493	12.3674	3.92216e-35	4.69198e-34
TACC3	3072.19	-1.12965	0.0913436	-12.3671	3.93849e-35	4.70903e-34
MCM8	1102.98	-1.00652	0.0814223	-12.3617	4.20922e-35	5.02746e-34
AIMP2	650.554	-1.07383	0.0868756	-12.3606	4.26993e-35	5.09729e-34
POFUT2	627.365	0.948619	0.0767539	12.3592	4.34303e-35	5.18185e-34
CSTA	4150.9	0.711919	0.0576121	12.3571	4.45919e-35	5.31487e-34
GLT8D1	1023.18	-0.834365	0.0675528	-12.3513	4.79253e-35	5.7092e-34
SMURF2	733.485	1.05585	0.0855082	12.3479	4.99826e-35	5.95117e-34
ERI2	942.747	-0.996333	0.0807111	-12.3444	5.21962e-35	6.21149e-34
DHODH	629.775	-1.11138	0.0900674	-12.3395	5.55264e-35	6.60434e-34
CCDC86	593.435	-1.55327	0.125898	-12.3375	5.69029e-35	6.76453e-34
PCYT2	903.619	-1.09125	0.0884604	-12.336	5.79573e-35	6.88628e-34
AC011247.3	45.9834	6.50918	0.527729	12.3343	5.91878e-35	7.02655e-34
SNTB1	2387.13	0.741977	0.0601555	12.3343	5.91995e-35	7.02655e-34
MAK	39.971	4.18123	0.339031	12.3329	6.02623e-35	7.14897e-34
SLC31A1	1934.1	0.811417	0.0658341	12.3252	6.63001e-35	7.86115e-34
SUCLA2	1178.16	-0.931458	0.0755758	-12.3248	6.65923e-35	7.89169e-34
MRPL14	976.649	-0.845928	0.0686591	-12.3207	7.00894e-35	8.3018e-34
UBE2Q1	2116.12	-0.703849	0.057139	-12.3182	7.23131e-35	8.56074e-34
ZMAT1	175.844	1.72659	0.140173	12.3176	7.28287e-35	8.6173e-34
SDF2L1	796.865	-1.63856	0.133028	-12.3174	7.30315e-35	8.63682e-34
NUP214	2551.8	-0.67106	0.0544975	-12.3136	7.65467e-35	9.04783e-34
C12orf43	428.014	-1.24222	0.100917	-12.3092	8.07795e-35	9.5432e-34
ARHGAP21	720.443	0.968295	0.0787178	12.3008	8.96413e-35	1.05846e-33
SMARCE1	1289.59	-0.914821	0.0744265	-12.2916	1.00493e-34	1.18598e-33
GUCD1	3121.32	-0.59853	0.0487074	-12.2883	1.04722e-34	1.23525e-33
NF2	1387.18	-0.689029	0.0560932	-12.2837	1.10878e-34	1.30719e-33
TMEM41B	632.071	0.998168	0.0812703	12.2821	1.13046e-34	1.33206e-33
WDR43	3827.86	-0.615394	0.0501063	-12.2818	1.13484e-34	1.33653e-33
N4BP2	2026.47	0.840261	0.0684184	12.2812	1.14274e-34	1.34514e-33
ACTN1	9501.28	-0.656635	0.0534669	-12.2812	1.1435e-34	1.34534e-33
MT1E	995.01	0.769659	0.0626717	12.2808	1.14839e-34	1.35039e-33
SDCCAG3	1659.68	-0.722096	0.0588121	-12.278	1.18893e-34	1.39734e-33
ASUN	1367.93	-0.834652	0.067984	-12.2772	1.20116e-34	1.41099e-33
NSF	2239.21	-0.778678	0.0634685	-12.2687	1.33344e-34	1.56476e-33
C12orf5	408.096	-1.24163	0.101205	-12.2685	1.33707e-34	1.56822e-33
LETM2	255.496	1.32425	0.107953	12.2668	1.36476e-34	1.59987e-33
ANP32E	6190.54	-0.82505	0.0672651	-12.2656	1.38506e-34	1.62283e-33
WDR26	3390.56	0.617328	0.0503317	12.2652	1.39252e-34	1.63074e-33
COG8	345.868	-1.26289	0.103054	-12.2546	1.58715e-34	1.8577e-33
PSMB6	2376.41	-0.59448	0.0485237	-12.2513	1.65228e-34	1.93295e-33
DNAJC1	576.511	1.00037	0.0816589	12.2506	1.66723e-34	1.94944e-33
AGO3	859.877	0.977446	0.0798041	12.2481	1.72058e-34	2.01079e-33
SEC61A2	339.067	1.29479	0.105719	12.2474	1.73364e-34	2.02501e-33
EARS2	991.545	-0.847156	0.0692092	-12.2405	1.88844e-34	2.20356e-33
AAK1	289.641	1.26544	0.103435	12.2342	2.04184e-34	2.38135e-33
FAM120B	979.657	-0.839211	0.0686393	-12.2264	2.24697e-34	2.61925e-33
PI4KAP1	257.348	1.2974	0.106123	12.2254	2.27432e-34	2.64977e-33
PNP	4336.39	-0.640802	0.0524246	-12.2233	2.33349e-34	2.71731e-33
SESN3	760.46	-1.06981	0.087523	-12.2231	2.33874e-34	2.72204e-33
PSKH1	663.203	-1.18011	0.0965534	-12.2224	2.36142e-34	2.74703e-33
CBFA2T3	1726.36	-1.15995	0.0949461	-12.2169	2.52403e-34	2.93321e-33
RBM48	411.044	1.2325	0.100938	12.2105	2.73347e-34	3.17498e-33
EBAG9	1012.04	-0.956164	0.0783082	-12.2103	2.7401e-34	3.18106e-33
LCP1	36754.5	-0.677588	0.0555055	-12.2076	2.83195e-34	3.28602e-33
E2F4	3358.92	-0.661101	0.0541669	-12.2049	2.92704e-34	3.39462e-33
ZNF689	513.271	-1.12134	0.0918775	-12.2047	2.93287e-34	3.39966e-33
LINC00998	1521.63	-0.878246	0.0720125	-12.1957	3.27491e-34	3.7942e-33
HIST2H2BF	48.4905	3.40743	0.279412	12.195	3.30432e-34	3.82633e-33
CTBP2	1627.32	-0.648786	0.0532052	-12.194	3.34426e-34	3.87061e-33
SLC2A6	356.215	1.94421	0.159558	12.185	3.73707e-34	4.32305e-33
SIPA1L2	204.581	1.42991	0.117512	12.1682	4.59102e-34	5.30551e-33
AMT	273.844	1.4153	0.116315	12.1678	4.61426e-34	5.32967e-33
RAD51AP1	1279.53	-1.0424	0.0857045	-12.1627	4.91154e-34	5.67016e-33
FAM86A	217.384	-1.69989	0.139769	-12.1622	4.94178e-34	5.70219e-33
HTATSF1	2837.24	-0.738187	0.0607132	-12.1586	5.1635e-34	5.95501e-33
UBLCP1	1334.72	-0.823329	0.0677199	-12.1579	5.20983e-34	6.0054e-33
PTGS1	762.951	0.884099	0.0727309	12.1557	5.34691e-34	6.1603e-33
NBN	4550.02	-0.723782	0.0595455	-12.1551	5.38954e-34	6.20628e-33
TRAPPC4	913.68	-0.886652	0.0729827	-12.1488	5.82191e-34	6.6974e-33
FAM105A	719.614	-1.06216	0.087433	-12.1483	5.85565e-34	6.73281e-33
THBS3	262.983	1.41517	0.116544	12.1429	6.25848e-34	7.19236e-33
LENG8	8843.55	1.18771	0.0978985	12.132	7.14794e-34	8.2104e-33
KIAA0247	1139.65	0.738106	0.0608675	12.1264	7.65045e-34	8.78318e-33
AGPAT3	2423.75	-0.851561	0.0702338	-12.1246	7.81967e-34	8.97294e-33
AGPS	3235.35	-0.854495	0.0705002	-12.1205	8.22942e-34	9.43836e-33
RNF10	3736.07	0.606577	0.050065	12.1158	8.71308e-34	9.98805e-33
LRMP	1362.15	0.826302	0.0682026	12.1154	8.75231e-34	1.0028e-32
MTND4P12	300.606	1.30606	0.107806	12.1149	8.81229e-34	1.00916e-32
HLA-A	6671.86	0.675202	0.0557408	12.1133	8.98585e-34	1.02852e-32
IDE	1365.05	-0.825316	0.0681592	-12.1087	9.50414e-34	1.0873e-32
PCIF1	1643.76	-0.974954	0.0805187	-12.1084	9.53169e-34	1.0899e-32
PRDX3	8544.32	-0.632563	0.0522646	-12.1031	1.01709e-33	1.16241e-32
DFFB	482.656	-1.03002	0.0851758	-12.0928	1.15266e-33	1.31669e-32
SLU7	2310.55	0.744645	0.0616087	12.0867	1.24181e-33	1.41782e-32
MTERF	457.989	-1.07029	0.0885655	-12.0847	1.27218e-33	1.45176e-32
FIP1L1	1474.02	-0.714906	0.0591597	-12.0843	1.27786e-33	1.45751e-32
CTD-2336O2.1	195.302	1.58306	0.131017	12.0829	1.30126e-33	1.48346e-32
PAIP2	1252.38	0.659521	0.0545955	12.0801	1.34478e-33	1.53231e-32
SNAPC5	618.92	-0.998546	0.0826718	-12.0784	1.37309e-33	1.56379e-32
MRGBP	786.193	-0.911554	0.0754924	-12.0748	1.43546e-33	1.634e-32
LINC00263	241.808	1.58773	0.131496	12.0743	1.44372e-33	1.64259e-32
KANSL1	1561.26	0.77485	0.0642019	12.0689	1.54093e-33	1.75231e-32
SMPD2	385.733	1.12975	0.093617	12.0678	1.56202e-33	1.7754e-32
GART	4907.14	-0.771273	0.0639649	-12.0577	1.76562e-33	2.00482e-32
ENTPD1	558.106	-1.06954	0.0887113	-12.0565	1.79326e-33	2.03519e-32
SIGMAR1	2933.26	-0.600861	0.0498745	-12.0475	2.00012e-33	2.26883e-32
RHEBL1	78.6904	2.37451	0.197145	12.0445	2.07363e-33	2.35105e-32
VTA1	2061.23	-0.86543	0.0718677	-12.042	2.13731e-33	2.42203e-32
ST6GAL1	800.511	-1.03476	0.0859343	-12.0412	2.1567e-33	2.44279e-32
CCDC137	1097.02	-1.05374	0.087523	-12.0396	2.20118e-33	2.49194e-32
NUP107	2327.87	-0.738505	0.0613603	-12.0355	2.31098e-33	2.61494e-32
RNMTL1	656.994	-0.886945	0.0737104	-12.0328	2.38837e-33	2.70117e-32
BRD3	1512.37	-1.07767	0.0895761	-12.0308	2.44847e-33	2.76776e-32
ZNF48	214.141	-1.75744	0.146182	-12.0222	2.7163e-33	3.069e-32
KIAA1143	1267.25	-0.836378	0.0696239	-12.0128	3.04348e-33	3.43696e-32
KIAA0141	2171.51	0.700167	0.0583019	12.0093	3.174e-33	3.58258e-32
MBP	3177.55	-0.60956	0.0507663	-12.0072	3.2582e-33	3.6758e-32
VPS37B	580.265	1.12814	0.0939593	12.0067	3.27589e-33	3.69393e-32
THAP7	684.62	-1.70534	0.142069	-12.0036	3.4019e-33	3.83412e-32
SNHG6	4917.71	0.747373	0.0622794	12.0003	3.53892e-33	3.98658e-32
LZTFL1	1167.52	0.859923	0.071676	11.9974	3.66848e-33	4.13048e-32
MAT2B	2271.61	-0.796248	0.0663713	-11.9969	3.69002e-33	4.15269e-32
LSM2	1299.6	-0.682679	0.0569338	-11.9908	3.97289e-33	4.46882e-32
ZNF180	487.725	-1.15298	0.0961723	-11.9887	4.07321e-33	4.5794e-32
EMC8	1055.34	-0.851638	0.0710943	-11.979	4.57872e-33	5.14519e-32
ATRIP	469.654	-1.05679	0.0882778	-11.9712	5.03116e-33	5.65082e-32
P2RX4	1104.04	0.845214	0.070629	11.967	5.29376e-33	5.94283e-32
USP9X	3440.14	0.730887	0.0611151	11.9592	5.81177e-33	6.51794e-32
CMAHP	193.206	1.4607	0.122153	11.9579	5.90236e-33	6.61627e-32
REC8	208.8	1.62017	0.13558	11.9499	6.499e-33	7.2815e-32
BCL2L2	652.035	0.975239	0.0816421	11.9453	6.87083e-33	7.69432e-32
PCGF1	562.72	0.949248	0.079488	11.942	7.14607e-33	7.99861e-32
GOLGA5	1040.79	-0.959542	0.0804846	-11.9221	9.08251e-33	1.01561e-31
SRP54	2370.57	-0.815457	0.0684203	-11.9184	9.49631e-33	1.06136e-31
ACN9	625.632	-1.02076	0.0856517	-11.9176	9.58545e-33	1.0708e-31
[truncated: 5,489 more rows]

## Sheet: DESeq2_CREBMIM_1hr-vs-PBS
	baseMean	log2FoldChange	lfcSE	stat	pvalue	padj
FOS	12944.3	1.35975	0.0600111	22.6583	1.15566e-113	1.06148e-109
EGR1	3143.93	0.883087	0.0741515	11.9092	1.05963e-32	4.86635e-29
DUSP1	2354.68	0.741661	0.108312	6.84742	7.51912e-12	2.3021e-08
RN7SK	1894.31	0.835774	0.135542	6.16618	6.99596e-10	1.60645e-06
RMRP	473.738	1.07723	0.203935	5.28224	1.27614e-07	0.000195356

## Sheet: DESeq2_CREBMIM_4hr-vs-PBS
	baseMean	log2FoldChange	lfcSE	stat	pvalue	padj
EGR1	3143.93	1.15812	0.086177	13.4389	3.57744e-41	8.65633e-37
FOS	12944.3	0.611195	0.0638467	9.57284	1.04007e-21	1.25833e-17
