# Supplementary material for: Convergent organization of aberrant MYB complex controls oncogenic gene expression in acute myeloid leukemia
Source: eLife. 2021 Feb 2;10:e65905. doi: 10.7554/eLife.65905 (PMC7886351; doi:10.7554/eLife.65905)
Supplement: Figure 6—source data 1. [file elife-65905-fig6-data1.xlsx]

## Sheet: ChIPseqDEseq2CRYBMIM-PBS1hMYBup
region	baseMean	log2FoldChange	lfcSE	stat	pvalue	padj	gene	distance
chr7_55600906_55602605	84.9483	1.59843	0.108253	14.7657	2.43821e-49	6.18648e-45	VOPP1	-17136
chr1_159892551_159895718	107.774	1.62994	0.124045	13.14	1.94328e-39	2.46535e-35	TAGLN2	0
chr9_20972852_20975002	46.2747	1.6305	0.132838	12.2743	1.2445e-34	1.05256e-30	FOCAD	-314545
chr21_47234000_47236226	46.2985	3.20243	0.273676	11.7015	1.25155e-31	7.93887e-28	AL592528.1	20108
chr4_1328972_1331486	41.8029	2.06278	0.189892	10.8629	1.73218e-27	8.79012e-24	MAEA	-45298
chr11_69064036_69066457	87.8865	1.39627	0.134607	10.3729	3.2925e-25	1.39234e-21	MYEOV	-2432
chr17_76319625_76321946	113.878	1.56329	0.152559	10.2471	1.21915e-24	4.41908e-21	AC061992.2	-7816
chr8_29630781_29631956	64.758	1.23645	0.124254	9.95099	2.49679e-23	7.91887e-20	AC145110.1	-24957
chr19_13956720_13959270	184.661	1.39622	0.142504	9.79778	1.15086e-22	2.92008e-19	MIR23A	-9247
chr9_116285648_116286844	50.7576	1.47991	0.157582	9.39135	5.92369e-21	1.36638e-17	RGS3	-78638
chr19_38703573_38705449	115.322	1.28791	0.14166	9.09155	9.76407e-20	2.06453e-16	DPF1	14906
chr11_121287667_121288481	52.6463	1.17991	0.137596	8.57515	9.8956e-18	1.79344e-14	RP11-730K11.1	35242
chr19_40323758_40325152	52.9589	1.75668	0.211353	8.31157	9.44419e-17	1.59752e-13	DYRK1B	0
chr19_40323758_40325152.1	52.9589	1.75668	0.211353	8.31157	9.44419e-17	1.59752e-13	FBL	11903
chr19_3141771_3142721	46.5261	1.30244	0.159011	8.19092	2.5923e-16	4.11091e-13	AC005264.2	12453
chr19_3141771_3142721.1	46.5261	1.30244	0.159011	8.19092	2.5923e-16	4.11091e-13	GNA15	-5581
chr1_4066957_4068238	35.0206	1.98782	0.243543	8.16208	3.29316e-16	4.91513e-13	RP13-614K11.2	-57917
chr20_49067293_49068222	40.9402	1.35317	0.174338	7.76175	8.37631e-15	1.18073e-11	RN7SL636P	-21273
chr16_89041817_89046018	136.331	0.714236	0.0923391	7.73492	1.03468e-14	1.38173e-11	CBFA2T3	0
chr5_176297635_176300376	21.6378	1.62592	0.214423	7.58275	3.38299e-14	4.29183e-11	UNC5A	-60158
chr17_10017663_10019015	61.5256	1.34357	0.184857	7.26813	3.64496e-13	4.40398e-10	GAS7	82854
chr14_102342508_102343379	31.1437	1.41938	0.196482	7.22397	5.04916e-13	5.52039e-10	CTD-2017C7.1	-36640
chr9_131545580_131546415	33.6551	1.37122	0.189936	7.2194	5.22167e-13	5.52039e-10	TBC1D13	3068
chr22_17738759_17739481	30.7891	1.65073	0.22896	7.20967	5.60868e-13	5.69236e-10	CECR3	8143
chr20_19954531_19956132	40.8705	1.16024	0.161337	7.19143	6.41151e-13	6.2569e-10	RIN2	-87367
chr15_75335149_75336504	73.3231	0.864331	0.124359	6.9503	3.64523e-12	3.30322e-09	PPCDC	-19222
chr4_50922_52103	148.492	0.725352	0.105633	6.86673	6.56884e-12	5.74728e-09	Z95704.4	-1072
chr2_101924568_101926803	66.4999	1.01187	0.14925	6.7797	1.20427e-11	1.01853e-08	MIR5696	0
chr1_159887829_159888618	23.7031	1.46822	0.217824	6.74039	1.57961e-11	1.29289e-08	TAGLN2	6905
chr1_153916929_153919456	76.197	1.04502	0.157779	6.62328	3.51318e-11	2.70121e-08	DENND4B	0
chr15_74838319_74839175	37.4369	1.18824	0.183933	6.46016	1.04593e-10	7.80542e-08	ARID3B	49762
chr17_79068447_79069422	39.3411	1.33376	0.211932	6.29333	3.10724e-10	2.19e-07	BAIAP2	2496
chr12_13253688_13254879	72.4609	1.14522	0.186034	6.15594	7.4632e-10	5.11794e-07	GSG1	1701
chr15_31558242_31559362	46.0151	0.970733	0.160397	6.05207	1.42992e-09	9.07035e-07	RP11-16E12.2	-35201
chr15_101261152_101263014	45.075	1.2162	0.201779	6.02739	1.66629e-09	1.03119e-06	RP11-66B24.5	-4699
chr19_54682954_54684721	40.4214	1.31879	0.220111	5.99147	2.0795e-09	1.25627e-06	MBOAT7	8946
chr1_9319760_9320977	33.8304	1.90687	0.318722	5.98287	2.19235e-09	1.29364e-06	H6PD	-24927
chr1_249239763_249240617	68.7821	0.939284	0.157289	5.9717	2.34799e-09	1.35399e-06	RNU6-1205P	-32769
chr9_107753048_107754308	52.6023	0.813047	0.142391	5.70995	1.13012e-08	6.10098e-06	RP11-217B7.3	0
chr14_105144038_105144680	22.2643	1.86643	0.328414	5.68317	1.32222e-08	6.98932e-06	MIR4710	0
chr1_159880029_159880970	38.485	1.41022	0.250266	5.63488	1.7518e-08	9.07108e-06	AL590560.1	0
chr15_74803874_74805117	42.4625	1.07868	0.191638	5.62874	1.81535e-08	9.2122e-06	RP11-10O17.3	-21932
chr10_125978778_125980314	49.9309	0.973784	0.17323	5.62133	1.89495e-08	9.42756e-06	CHST15	-125680
chr22_23276784_23278462	51.4644	0.814288	0.145964	5.57868	2.42354e-08	1.18255e-05	IGLC7	-12019
chr6_25992113_25993155	33.3189	1.17103	0.21185	5.52765	3.24556e-08	1.52499e-05	U91328.19	0
chr6_25992113_25993155.1	33.3189	1.17103	0.21185	5.52765	3.24556e-08	1.52499e-05	U91328.21	6241
chr11_111807330_111808166	25.1774	1.36632	0.24836	5.50138	3.76838e-08	1.73845e-05	DIXDC1	-9463
chr7_100767742_100770526	73.6072	0.876958	0.161008	5.44667	5.13215e-08	2.28453e-05	SERPINE1	0
chr19_19366810_19367803	25.0372	1.60754	0.29546	5.44083	5.30343e-08	2.32007e-05	AC138430.4	16376
chr19_19366810_19367803.1	25.0372	1.60754	0.29546	5.44083	5.30343e-08	2.32007e-05	HAPLN4	5803
chr16_88152360_88153102	29.5847	1.23381	0.227102	5.43284	5.54651e-08	2.38528e-05	RP11-863P13.4	-17795
chr11_121289265_121289887	21.1717	1.43966	0.266999	5.39201	6.96723e-08	2.94633e-05	RP11-730K11.1	33836
chr2_206563703_206566026	49.8924	0.891119	0.165847	5.37313	7.73818e-08	3.21671e-05	NRP2	-16480
chr5_75698151_75702230	99.7863	0.694836	0.129385	5.37031	7.86016e-08	3.21671e-05	IQGAP2	0
chr11_64109095_64110286	33.01	0.93145	0.177195	5.25665	1.46701e-07	5.75707e-05	CCDC88B	-1401
chr19_4968313_4969522	51.4581	0.99811	0.189911	5.25567	1.47483e-07	5.75707e-05	KDM4B	0
chr19_55850208_55851681	70.4062	0.976603	0.185636	5.26085	1.4339e-07	5.75707e-05	AC020922.1	0
chr19_55850208_55851681.1	70.4062	0.976603	0.185636	5.26085	1.4339e-07	5.75707e-05	SUV420H2	0
chr21_45594888_45595512	24.136	1.23332	0.234975	5.24875	1.53132e-07	5.88698e-05	AP001056.1	0
chr19_6279509_6280429	33.8496	1.36995	0.262277	5.22329	1.75776e-07	6.65667e-05	MLLT1	0
chr1_2064467_2065313	31.3732	1.24558	0.238857	5.21474	1.84075e-07	6.86843e-05	PRKCZ	-59567
chr16_59100813_59101756	39.8674	0.971071	0.186723	5.20061	1.98639e-07	7.30446e-05	RP11-410D17.2	-317272
chr10_121065300_121066391	28.3103	1.17794	0.226855	5.1925	2.07487e-07	7.52081e-05	GRK5	-98200
chr20_46356116_46356860	35.9663	1.07654	0.208635	5.15991	2.47074e-07	8.82959e-05	SULF2	58501
chr10_104401779_104406409	135.807	0.599276	0.117628	5.09466	3.49359e-07	0.000123115	RP11-47A8.5	0
chr10_104401779_104406409.1	135.807	0.599276	0.117628	5.09466	3.49359e-07	0.000123115	TRIM8	0
chr19_16434893_16436983	87.408	0.90711	0.179246	5.06071	4.17705e-07	0.000145184	CTD-2562J15.6	0
chr19_16434893_16436983.1	87.408	0.90711	0.179246	5.06071	4.17705e-07	0.000145184	KLF2	0
chr12_124698071_124698750	18.2558	1.43581	0.284326	5.04989	4.42063e-07	0.000151574	FAM101A	-240280
chr1_9900_10569	56.9038	0.859998	0.170814	5.0347	4.7861e-07	0.000161917	DDX11L1	1300
chr18_77384973_77385748	32.3762	1.08391	0.215868	5.0212	5.13508e-07	0.000171437	RP11-567M16.2	-14227
chr9_139512858_139515739	68.7512	0.731766	0.145894	5.01573	5.28322e-07	0.000174092	U3	-15892
chr20_47338530_47340797	71.2419	0.742599	0.148731	4.99289	5.94827e-07	0.000193494	PREX1	103624
chr2_235392204_235393169	40.3867	1.04991	0.211583	4.96218	6.97078e-07	0.000223886	ARL4C	12529
chr16_83847405_83848216	23.3521	1.27555	0.261112	4.88506	1.03399e-06	0.000319943	HSBP1	-5958
chr19_45975729_45979017	66.6809	0.849722	0.173901	4.88625	1.02773e-06	0.000319943	FOSB	-4477
chr9_116341102_116343262	53.0753	0.712912	0.145796	4.88981	1.00935e-06	0.000319943	RGS3	-134092
chr9_116341102_116343262.1	53.0753	0.712912	0.145796	4.88981	1.00935e-06	0.000319943	RP11-168K11.2	9038
chr14_105126365_105127213	16.8489	1.36324	0.279821	4.87182	1.10576e-06	0.000338029	RP11-982M15.7	-4461
chr10_129862474_129863436	42.9543	0.939865	0.193894	4.84731	1.25144e-06	0.00037801	PTPRE	-157150
chr11_66103106_66104660	53.032	0.932026	0.192413	4.84389	1.2732e-06	0.000380058	RIN1	0
chr11_66103106_66104660.1	53.032	0.932026	0.192413	4.84389	1.2732e-06	0.000380058	RP11-867G23.12	-1142
chr21_47238149_47239386	44.4725	0.849296	0.176422	4.814	1.47939e-06	0.000431456	AL592528.1	16948
chr22_37986300_37987019	23.2022	1.45848	0.303129	4.81142	1.49862e-06	0.000432096	LGALS2	-10213
chr16_34835083_34835652	20.6444	1.33441	0.277934	4.80118	1.5773e-06	0.000445695	RP11-14K3.7	38748
chr21_44818513_44820054	43.8466	0.896167	0.186759	4.79851	1.59848e-06	0.000445695	SIK1	26955
chr19_36398897_36400738	67.5457	0.746775	0.155787	4.79356	1.63849e-06	0.000451885	TYROBP	0
chr17_46560648_46561363	19.3923	1.56607	0.328259	4.77085	1.83448e-06	0.00048996	RP11-433M22.2	-22917
chr2_8442072_8444075	59.2879	0.729684	0.153742	4.74615	2.07329e-06	0.000547975	LINC00299	24475
chr9_72694731_72696560	42.6977	0.840439	0.178079	4.71948	2.36446e-06	0.000618488	MAMDC2	-36235
chr22_21399212_21400424	28.1277	1.19074	0.25264	4.71321	2.4385e-06	0.000631347	AC002472.13	0
chr22_21399212_21400424.1	28.1277	1.19074	0.25264	4.71321	2.4385e-06	0.000631347	P2RX6P	0
chr15_75417090_75418116	33.3349	1.11126	0.236087	4.707	2.51384e-06	0.000644279	SCARNA20	-3083
chr8_41108266_41109083	41.3062	0.933223	0.198904	4.69182	2.7078e-06	0.00068705	MIR548AO	19580
chr11_58983941_58984949	53.1646	0.670244	0.143054	4.68525	2.79617e-06	0.000702449	RN7SL42P	-1769
chr7_302812_304253	21.8634	1.46121	0.312034	4.68287	2.82889e-06	0.0007037	AC187652.1	0
chr21_44831889_44832702	21.8627	1.23929	0.266773	4.6455	3.39259e-06	0.00082076	SIK1	14307
chr7_98270858_98271804	27.4277	1.04995	0.226026	4.64526	3.39652e-06	0.00082076	NPTX2	-24250
chr10_5930809_5932588	47.5601	0.92504	0.199277	4.64199	3.45069e-06	0.000825984	ANKRD16	0
chr10_5930809_5932588.1	47.5601	0.92504	0.199277	4.64199	3.45069e-06	0.000825984	FBXO18	0
chr12_113645722_113646831	55.3658	0.675523	0.14572	4.63575	3.55639e-06	0.000843329	IQCD	12069
chr6_90007404_90008982	45.6489	0.833096	0.180027	4.62762	3.69899e-06	0.000869024	GABRR2	16037
chr10_121073059_121073713	26.563	1.1336	0.246175	4.60485	4.12762e-06	0.000960827	GRK5	-105959
chr10_65387390_65391000	97.9222	0.589221	0.12864	4.58038	4.64121e-06	0.00106091	RP11-170M17.1	33424
chr1_151916572_151919563	86.8616	0.601101	0.131456	4.57266	4.81582e-06	0.001091	THEM4	-34288
chr5_6645470_6646161	25.1168	1.22601	0.270187	4.53765	5.68838e-06	0.00127727	SRD5A1	-12015
chr1_151913502_151915559	64.7237	0.944669	0.209969	4.49909	6.82459e-06	0.00151895	THEM4	-31218
chr19_8454586_8455838	58.7434	1.01828	0.226561	4.4945	6.97351e-06	0.0015386	RAB11B	0
chr19_8454586_8455838.1	58.7434	1.01828	0.226561	4.4945	6.97351e-06	0.0015386	RAB11B-AS1	0
chr19_13960723_13962705	77.0165	0.781673	0.176084	4.43921	9.02877e-06	0.00190906	NANOS3	10172
chr17_2886182_2886794	26.0016	0.971314	0.219013	4.43496	9.20873e-06	0.00193102	CTD-3060P21.1	-16993
chr13_114064079_114066393	59.6114	0.826636	0.186931	4.42215	9.77242e-06	0.00203242	ADPRHL1	41447
chr19_49377374_49380130	87.029	0.631112	0.143366	4.4021	1.0721e-05	0.00220917	PPP1R15A	-1726
chr5_60626697_60628207	40.4725	1.17317	0.266594	4.40058	1.07964e-05	0.00220917	ZSWIM6	0
chr10_30722458_30723809	41.7838	0.913456	0.208387	4.38346	1.16808e-05	0.0023522	MAP3K8	0
chr1_230645130_230645882	35.7039	0.802016	0.183238	4.37691	1.20373e-05	0.00238611	RP11-543E8.1	85448
chr1_212659050_212659958	32.2852	1.18462	0.271421	4.3645	1.27416e-05	0.00250615	RP11-61J19.2	-17965
chr9_138831139_138831736	18.81	1.45987	0.336632	4.33668	1.44652e-05	0.00282327	UBAC1	21491
chr4_40602774_40604123	46.4575	0.724065	0.167284	4.32836	1.5022e-05	0.00290958	RBM47	28518
chr1_115641557_115642533	36.5408	0.982391	0.227506	4.31808	1.57392e-05	0.00302538	RP4-666F24.3	0
chr2_239685018_239686391	17.8588	1.30312	0.302424	4.3089	1.64066e-05	0.00312997	AC144525.1	11967
chr1_17340292_17340796	18.1467	1.11793	0.259993	4.29983	1.70926e-05	0.00321252	ATP13A2	-1869
chr10_43902527_43905307	83.4481	0.69777	0.16386	4.25833	2.05961e-05	0.00384253	HNRNPF	0
chr19_45953289_45955146	106.049	0.816225	0.191839	4.25475	2.09284e-05	0.00387603	FOSB	16107
chr19_1651406_1653577	153.998	0.723658	0.170503	4.24425	2.19323e-05	0.00403209	TCF3	0
chr3_130568666_130569731	32.4702	0.971793	0.229421	4.23585	2.27687e-05	0.0041265	ATP2C1	0
chr8_145158003_145160064	100.599	0.725434	0.171585	4.22784	2.3595e-05	0.00424593	MAF1	0
chr8_145158003_145160064.1	100.599	0.725434	0.171585	4.22784	2.3595e-05	0.00424593	SHARPIN	0
chr19_12551693_12552126	17.1385	1.49414	0.353942	4.22143	2.42758e-05	0.00430987	CTD-3105H18.16	0
chr19_12551693_12552126.1	17.1385	1.49414	0.353942	4.22143	2.42758e-05	0.00430987	CTD-3105H18.18	43505
chr19_12551693_12552126.2	17.1385	1.49414	0.353942	4.22143	2.42758e-05	0.00430987	ZNF443	0
chr15_31507678_31509163	49.7968	0.754602	0.179406	4.20611	2.59802e-05	0.00454618	RP11-16E12.1	0
chr16_90098026_90099441	39.4775	1.25272	0.297943	4.20456	2.61594e-05	0.00454618	GAS8	-9019
chr20_46060651_46061543	26.3705	1.15256	0.274234	4.20282	2.63608e-05	0.00455003	RP1-148H17.1	-19580
chr8_145024845_145027359	97.0754	0.721276	0.171786	4.19869	2.68468e-05	0.00460259	PLEC	23544
chr16_57073052_57073586	18.5071	1.19132	0.284597	4.18601	2.83901e-05	0.00480228	NLRC5	-49643
chr8_578994_581430	62.4247	0.921349	0.220694	4.17478	2.98271e-05	0.00501194	ERICH1	106677
chr11_64102504_64103156	17.7889	1.2554	0.300837	4.17303	3.00575e-05	0.00501743	CCDC88B	4539
chr10_6205430_6206304	31.5631	1.17451	0.282954	4.15089	3.31191e-05	0.00546953	PFKFB3	-18534
chr12_111797161_111797912	30.8802	0.924699	0.22364	4.13477	3.55315e-05	0.0057423	FAM109A	9014
chr19_10538631_10539246	26.8307	1.08715	0.263427	4.12696	3.67596e-05	0.00590317	PDE4A	-11183
chr22_29706904_29707843	27.6621	1.21766	0.295504	4.12061	3.77863e-05	0.00595498	GAS2L1	-3892
chr6_158181863_158182973	35.0588	0.96482	0.234089	4.1216	3.76255e-05	0.00595498	SNX9	61323
chr17_56016923_56017510	17.0468	1.08658	0.264937	4.10126	4.10898e-05	0.00643562	CUEDC1	15175
chr14_105956115_105958143	56.2161	0.964097	0.237449	4.06023	4.90236e-05	0.00753865	C14orf80	0
chr14_105956115_105958143.1	56.2161	0.964097	0.237449	4.06023	4.90236e-05	0.00753865	CRIP1	-1558
chr9_110437076_110438377	36.3554	0.821164	0.202425	4.05663	4.97852e-05	0.0075982	RNU6-996P	-11549
chr2_127822247_127823445	31.4904	0.804947	0.198794	4.04915	5.1405e-05	0.00767235	BIN1	41487
chr9_72708412_72709285	18.3386	1.28655	0.318035	4.04531	5.22544e-05	0.00775352	MAMDC2	-49916
chr9_72708412_72709285.1	18.3386	1.28655	0.318035	4.04531	5.22544e-05	0.00775352	MAMDC2-AS1	81520
chr8_21766354_21767377	36.3485	0.934588	0.231621	4.035	5.46026e-05	0.00800827	DOK2	3995
chr17_7737294_7740715	82.1223	0.699774	0.173926	4.02341	5.73624e-05	0.00836156	KDM6B	2507
chr7_104583964_104586091	78.6159	0.632902	0.157354	4.02215	5.76705e-05	0.00836156	RP11-325F22.2	-2312
chr7_28724177_28725846	42.9622	0.912265	0.227873	4.0034	6.24392e-05	0.00900153	CREB5	-385238
chr17_25871317_25873310	49.2741	0.71929	0.18027	3.99006	6.60557e-05	0.00941591	KSR1	74751
chr10_12154662_12155511	33.0335	0.772163	0.19471	3.96571	7.31779e-05	0.0102726	DHTKD1	-43692
chr19_7766493_7767152	23.7438	0.971956	0.245177	3.9643	7.36129e-05	0.0102726	FCER2	0
chr20_24128857_24129575	41.6866	0.600117	0.151439	3.96275	7.40899e-05	0.0102726	RP5-1100I6.1	-3835
chr21_45148191_45149045	35.7529	0.982933	0.247969	3.96393	7.37256e-05	0.0102726	PDXK	-9217
chr4_4542713_4544108	62.0933	0.823852	0.208043	3.96	7.49505e-05	0.0103354	STX18	0
chr4_4542713_4544108.1	62.0933	0.823852	0.208043	3.96	7.49505e-05	0.0103354	STX18-AS1	0
chr10_90846342_90847476	41.5633	0.760056	0.192425	3.94988	7.81893e-05	0.0107238	MIR4679-2	-23174
chr8_29606762_29607402	18.4416	1.09788	0.278318	3.94469	7.9904e-05	0.0109	AC145110.1	-938
chr1_40399402_40400804	39.8939	0.946247	0.239991	3.94285	8.05205e-05	0.0109254	MFSD2A	19998
chr11_63952620_63954684	48.344	0.803126	0.205198	3.91392	9.0811e-05	0.012155	STIP1	0
chr4_160023901_160024637	21.2329	1.72846	0.441847	3.91189	9.15751e-05	0.0121651	AC095064.1	20200
chr15_31555234_31556939	59.9528	0.586547	0.150057	3.90881	9.27506e-05	0.0122571	RP11-16E12.2	-32193
chr9_116344004_116344661	22.6577	0.826218	0.211873	3.89959	9.63549e-05	0.0126674	RGS3	-136994
chr9_116344004_116344661.1	22.6577	0.826218	0.211873	3.89959	9.63549e-05	0.0126674	RP11-168K11.2	7639
chr17_26368193_26368988	22.1419	1.33891	0.344087	3.89121	9.97474e-05	0.0129789	NLK	0
chr10_12375064_12376517	50.084	0.817263	0.211086	3.87171	0.000108076	0.0138496	RN7SL198P	-4676
chr20_60813154_60814027	30.1228	1.08093	0.279156	3.87215	0.00010788	0.0138496	OSBPL2	0
chr12_55435103_55435900	21.044	1.01932	0.263359	3.87044	0.000108639	0.0138517	NEUROD4	-21375
chr17_34409330_34410574	48.4718	0.702081	0.181481	3.86862	0.000109453	0.0138858	AC069363.1	-9105
chr11_67770021_67771769	40.784	0.903535	0.234392	3.8548	0.000115824	0.0143421	UNC93B1	0
chr15_44580052_44581378	52.4329	0.930525	0.241401	3.85469	0.000115877	0.0143421	CASC4	0
chr2_232468816_232470035	49.7545	0.996772	0.258872	3.85044	0.000117904	0.0145222	C2orf57	-11242
chr16_68403384_68404551	33.953	0.804776	0.209576	3.84001	0.000123027	0.01508	SMPD3	78041
chr11_2846957_2848448	52.7492	0.588814	0.153649	3.8322	0.000127001	0.0154923	KCNQ1	-380737
chr21_43615461_43615987	17.5074	1.00355	0.262443	3.82389	0.000131362	0.0159476	ABCG1	3812
chr1_1709438_1710711	34.2981	0.95613	0.250131	3.82252	0.000132095	0.0159603	NADK	798
chr18_9954_10612	32.0602	0.891564	0.2337	3.81499	0.00013619	0.0162997	AP005530.1	579
chr3_52406890_52407562	22.0549	0.953807	0.250135	3.81317	0.000137198	0.0163019	DNAH1	-56556
chr2_240322596_240324036	51.1251	0.93846	0.246521	3.80682	0.000140766	0.0166124	AC062017.1	0
chr2_240322596_240324036.1	51.1251	0.93846	0.246521	3.80682	0.000140766	0.0166124	HDAC4	0
chr20_62918102_62918746	18.9459	1.18524	0.311756	3.80182	0.000143638	0.0168728	LINC00266-1	2992
chr8_356435_357666	34.6078	1.0153	0.267209	3.79964	0.000144904	0.0169431	FBXO25	0
chr2_238064574_238065513	32.704	0.802232	0.211266	3.79727	0.0001463	0.0170278	AC107079.1	-31834
chr19_17854522_17855688	33.8084	1.18369	0.312004	3.79384	0.000148335	0.0171859	FCHO1	2839
chr1_46767264_46769568	71.6564	0.771343	0.203547	3.7895	0.00015095	0.0172239	LRRC41	0
chr1_46767264_46769568.1	71.6564	0.771343	0.203547	3.7895	0.00015095	0.0172239	UQCRH	0
chr2_85197414_85199479	58.6282	0.903818	0.238502	3.78957	0.00015091	0.0172239	KCMF1	0
chr14_75743175_75746170	106.242	0.619419	0.163571	3.78685	0.000152568	0.0172818	FOS	0
chr9_35811810_35812554	31.7311	0.948403	0.251184	3.77573	0.000159538	0.0179113	SPAG8	0
chr1_9485921_9486843	29.8824	0.704254	0.186777	3.77055	0.000162888	0.0182035	RNA5SP40	10995
chr7_157724898_157726924	25.7649	1.08763	0.288659	3.76786	0.000164654	0.0182435	PTPRN2	653557
chr14_105947238_105949025	63.4717	0.794483	0.211792	3.75125	0.000175953	0.0194107	CRIP1	3629
chr14_102256418_102257017	17.1921	1.0664	0.285528	3.73483	0.000187843	0.0205437	PPP2R5C	-28212
chr1_203255683_203257184	57.4085	0.768958	0.20599	3.73299	0.000189223	0.0206059	RP11-134P9.3	0
chr19_1259114_1261498	82.8201	0.69842	0.188237	3.71032	0.000206994	0.0219752	CIRBP	0
chr19_1259114_1261498.1	82.8201	0.69842	0.188237	3.71032	0.000206994	0.0219752	MIDN	-9228
chr6_159107824_159108377	17.914	1.27376	0.343219	3.71122	0.000206265	0.0219752	SYTL3	-36740
chr10_80059383_80060037	23.1938	1.02646	0.278853	3.68101	0.000232314	0.0240592	LINC00595	-32248
chr10_80059383_80060037.1	23.1938	1.02646	0.278853	3.68101	0.000232314	0.0240592	RP11-90J7.2	-5785
chr1_33899145_33899865	36.9342	0.836121	0.227512	3.67506	0.000237796	0.0244275	AL138837.1	7848
chr8_90913866_90915456	51.6221	0.731734	0.199225	3.6729	0.000239814	0.0245355	OSGIN2	0
chr2_8818624_8819590	28.0719	0.915072	0.249871	3.66218	0.000250083	0.0253814	AC011747.7	0
chr2_8818624_8819590.1	28.0719	0.915072	0.249871	3.66218	0.000250083	0.0253814	ID2	0
chr19_12511525_12512268	26.918	0.899092	0.24632	3.6501	0.000262142	0.0260837	CTD-3105H18.14	0
chr19_12511525_12512268.1	26.918	0.899092	0.24632	3.6501	0.000262142	0.0260837	CTD-3105H18.16	39629
chr19_12511525_12512268.2	26.918	0.899092	0.24632	3.6501	0.000262142	0.0260837	ZNF799	0
chr10_134350227_134351495	44.7703	1.09119	0.299797	3.63977	0.000272887	0.0268371	INPP5A	0
chr3_10215376_10216167	28.2864	1.06861	0.293874	3.6363	0.000276583	0.0269913	IRAK2	-8828
chr16_73187880_73188688	27.1173	0.828674	0.229259	3.61457	0.000300847	0.0291351	C16orf47	-9534
chr20_30310566_30311828	38.371	0.814637	0.22567	3.60987	0.000306356	0.0295558	BCL2L1	0
chr16_4321396_4323967	84.2797	0.61358	0.170144	3.60623	0.000310677	0.0297465	TFAP4	0
chr8_38853686_38855113	50.7821	0.804737	0.223351	3.60301	0.000314555	0.0300045	ADAM9	0
chr8_38853686_38855113.1	50.7821	0.804737	0.223351	3.60301	0.000314555	0.0300045	TM2D2	0
chrX_12968254_12969344	20.9764	1.27526	0.354609	3.59624	0.000322853	0.0304526	TMSB4X	24019
chr8_38814884_38815490	38.2414	0.619862	0.173556	3.57153	0.000354897	0.0328643	PLEKHA2	-56132
chr17_76325189_76326163	30.1499	1.03467	0.289975	3.56814	0.000359528	0.033172	AC061992.2	-13380
chr17_76337616_76339638	53.8852	0.645988	0.181231	3.56445	0.000364618	0.0335198	AC061992.2	-25807
chr16_58459835_58460468	24.8141	0.916849	0.258113	3.55213	0.00038213	0.0347519	RP11-481J2.2	-4571
chr17_45972934_45974155	44.2024	0.742048	0.209086	3.54901	0.000386685	0.0349158	RP11-6N17.4	0
chr17_45972934_45974155.1	44.2024	0.742048	0.209086	3.54901	0.000386685	0.0349158	SP2	0
chr13_26760079_26760992	33.1571	0.817309	0.230546	3.54511	0.00039245	0.0353108	RNF6	35800
chr15_70556443_70557025	22.9285	0.97024	0.273861	3.54281	0.000395881	0.0354936	RP11-543G18.1	56890
chr1_226914533_226915263	18.3904	1.14027	0.322772	3.53275	0.000411257	0.0364854	ITPKB	11762
chr19_13901039_13901679	32.6305	0.831659	0.235626	3.52957	0.000416239	0.0367987	AC008686.1	-67
chr14_72917751_72918647	25.309	0.863711	0.24511	3.52377	0.000425456	0.0373532	RGS6	-486243
chr10_133574729_133576765	62.0364	0.620053	0.176038	3.52226	0.000427878	0.0374364	AL450307.1	45771
chr15_38421586_38423577	48.3858	0.5956	0.169202	3.52005	0.000431463	0.0376203	RP11-1008C21.2	-56702
chr19_50143230_50145857	139.265	0.664002	0.188708	3.51868	0.000433696	0.0376855	RRAS	0
chr19_50143230_50145857.1	139.265	0.664002	0.188708	3.51868	0.000433696	0.0376855	SCAF1	0
chr5_671727_673587	54.2761	0.8359	0.238379	3.5066	0.000453877	0.0389288	TPPP	19924
chr10_11267721_11268600	28.2089	0.819535	0.233948	3.50306	0.000459947	0.0392937	CELF2	-207616
chr19_45504350_45505592	43.4	1.14655	0.327768	3.49806	0.000468658	0.0396375	RELB	0
chr3_52259528_52260322	18.3576	0.935397	0.267977	3.49059	0.000481961	0.0404927	TLR9	4885
chr1_2158798_2159435	18.9314	1.78443	0.51244	3.48223	0.000497254	0.0412315	SKI	699
chr13_110790194_110791231	52.1562	0.642669	0.184745	3.47869	0.000503876	0.0414728	RN7SL783P	-39696
chr7_6412749_6414742	53.0496	0.699925	0.201149	3.47963	0.000502105	0.0414728	RAC1	0
chr1_7168255_7168801	21.4208	0.861053	0.247685	3.4764	0.000508198	0.041567	RP11-334N17.1	-93916
chr14_93051115_93051660	20.0509	1.15274	0.331724	3.47499	0.000510864	0.041567	RIN3	-70998
chr9_34986287_34987016	26.9324	1.33962	0.38552	3.47485	0.00051113	0.041567	DNAJB5	2622
chr2_10637860_10638452	20.9266	0.897038	0.259869	3.45189	0.000556683	0.0444965	AC007249.3	-45416
chr22_21102999_21103533	18.134	0.946725	0.274286	3.45159	0.000557285	0.0444965	PI4KA	109568
chr3_185927563_185928531	27.9412	0.797155	0.230965	3.45141	0.000557675	0.0444965	DGKG	151496
chr7_152160480_152162040	55.4388	0.803511	0.232765	3.45203	0.000556392	0.0444965	LINC01003	0
chr8_142336884_142338052	50.3707	0.589704	0.171092	3.44671	0.000567463	0.045086	RP11-10J21.6	-656
chr19_3035191_3036467	44.4463	0.857998	0.24971	3.43598	0.000590415	0.0463144	TLE2	11167
chr18_2958821_2959425	24.9233	0.933874	0.272367	3.42874	0.000606388	0.0470248	LPIN2	52521
chr18_2958821_2959425.1	24.9233	0.933874	0.272367	3.42874	0.000606388	0.0470248	RP11-737O24.2	-10586
chr7_41515545_41516422	20.4129	0.904577	0.263874	3.42807	0.000607895	0.0470248	INHBA-AS1	217092
chr1_66716241_66718199	46.9709	0.645462	0.188872	3.41746	0.000632077	0.0477949	PDE4B	101866
chr1_182453521_182454430	34.109	0.589607	0.172587	3.41629	0.000634805	0.0477949	RGSL1	-34241
chr11_62318976_62319839	30.5943	1.24481	0.363989	3.4199	0.00062644	0.0477949	RP11-864I4.4	-5506
chr15_31617545_31620806	84.8251	0.616532	0.180359	3.41836	0.000629988	0.0477949	KLF13	0
chr17_64187875_64188735	28.164	0.853697	0.249637	3.41975	0.00062678	0.0477949	CEP112	0
chr19_41829300_41830415	43.1725	0.681508	0.199245	3.42045	0.000625171	0.0477949	CCDC97	-13207
chr7_66093156_66094303	28.3556	1.11016	0.324908	3.41686	0.000633486	0.0477949	KCTD7	0
chr1_173012016_173012829	19.3581	1.07698	0.316286	3.40507	0.000661465	0.0493243	RP1-15D23.2	-266972
chr1_173012016_173012829.1	19.3581	1.07698	0.316286	3.40507	0.000661465	0.0493243	TNFSF18	7275
chr16_66960887_66962693	41.3215	0.710706	0.208756	3.40448	0.000662894	0.0493243	RRAD	-1340
chr7_98399631_98400525	33.1639	0.810502	0.23814	3.40346	0.000665376	0.0493643	RNU6-393P	-7184
chr6_151710973_151713088	76.0742	0.631741	0.185791	3.40028	0.000673167	0.0497967	ZBTB2	0
chr9_140353327_140354284	31.5214	1.34626	0.396427	3.39599	0.000683813	0.0504372	NSMF	0
chr19_7894428_7895282	47.6394	0.77403	0.228277	3.39075	0.000697014	0.0509664	EVI5L	0
chr21_44830296_44831070	17.7752	0.974229	0.287831	3.38472	0.000712496	0.0516519	SIK1	15939
chr1_205257188_205257808	31.2796	0.74398	0.21994	3.38265	0.0007179	0.051748	NUAK2	33076
chr16_1832151_1833276	48.7641	1.03088	0.304953	3.38046	0.000723655	0.052015	NUBP2	0
chr16_1832151_1833276.1	48.7641	1.03088	0.304953	3.38046	0.000723655	0.052015	SPSB3	0
chr19_42772234_42773812	62.0623	0.648927	0.192135	3.37745	0.000731613	0.0523437	CIC	0
chr20_49547018_49548775	54.3953	0.823168	0.243822	3.3761	0.000735214	0.0523437	ADNP	0
chr20_49547018_49548775.1	54.3953	0.823168	0.243822	3.3761	0.000735214	0.0523437	RP5-914P20.5	0
chr3_193851600_193853916	62.8842	0.586756	0.1739	3.37409	0.000740605	0.0523437	HES1	18
chrX_24167174_24168741	44.8488	1.03056	0.305323	3.37532	0.000737288	0.0523437	ZFX	0
chrX_24167174_24168741.1	44.8488	1.03056	0.305323	3.37532	0.000737288	0.0523437	ZFX-AS1	0
chr20_1446920_1448930	62.7494	0.68814	0.204161	3.37057	0.000750116	0.0528686	NSFL1C	0
chr18_77793178_77794820	63.2626	0.865057	0.257068	3.36509	0.000765184	0.0536326	RBFA	0
chr18_77793178_77794820.1	63.2626	0.865057	0.257068	3.36509	0.000765184	0.0536326	RP11-795F19.5	0
chr3_11120766_11121392	23.7552	0.940991	0.279591	3.3656	0.000763783	0.0536326	HRH1	57387
chr19_7848936_7849395	25.9204	0.890465	0.264783	3.363	0.00077101	0.053744	CLEC4M	-20902
chr11_64107415_64108378	21.4257	1.06284	0.31765	3.34594	0.000820029	0.0565517	CCDC88B	0
chr16_89038073_89038712	17.6593	0.999528	0.298743	3.34578	0.000820511	0.0565517	CBFA2T3	4901
chr17_45726417_45728424	67.8697	0.761218	0.22756	3.34513	0.000822432	0.0565517	RP11-580I16.2	0
chr22_36877187_36878409	61.1707	0.866714	0.25916	3.34431	0.000824864	0.0565656	TXN2	0
chr15_39718819_39719886	42.3989	0.661599	0.198132	3.33919	0.000840239	0.0574647	RP11-624L4.1	0
chr17_40427996_40429588	32.4955	1.06799	0.321263	3.32436	0.000886209	0.0595267	STAT5B	0
chr20_48842989_48843625	22.2544	0.914745	0.275168	3.32431	0.000886376	0.0595267	CEBPB	-35614
chr7_30198802_30199756	41.5871	0.666007	0.200263	3.32566	0.000882087	0.0595267	AC007036.5	-1656
chr21_17101902_17103015	29.7099	1.16267	0.350121	3.32076	0.000897733	0.0599954	USP25	0
chr22_23057338_23057951	21.0497	0.917378	0.276351	3.31961	0.000901438	0.060032	IGLV3-21	-3165
chr7_765720_767079	27.6332	1.29831	0.391341	3.31759	0.000907986	0.0603097	PRKAR1B	209
chr4_57773813_57776060	62.0866	0.629184	0.189822	3.31461	0.00091772	0.0607972	REST	0
chr19_18539495_18540546	50.024	0.624817	0.18921	3.30224	0.000959152	0.0628643	SSBP4	-9350
chr5_149185291_149185744	17.0243	1.00951	0.305896	3.30018	0.000966236	0.0630239	PPARGC1B	-75431
chr8_144450553_144451234	34.3551	0.881486	0.267533	3.29486	0.0009847	0.0640636	RHPN1	0
chr8_144450553_144451234.1	34.3551	0.881486	0.267533	3.29486	0.0009847	0.0640636	RHPN1-AS1	0
chr11_28129100_28130206	41.0415	0.849629	0.257954	3.29372	0.000988722	0.064083	KIF18A	0
chr11_28129100_28130206.1	41.0415	0.849629	0.257954	3.29372	0.000988722	0.064083	METTL15	0
chr16_2301232_2302370	29.0883	0.888697	0.269847	3.29334	0.00099005	0.064083	ECI1	0
chr19_45244828_45245625	31.4376	0.757868	0.230242	3.29161	0.000996147	0.0643136	BCL3	5468
chr19_45873777_45874266	23.9183	0.860322	0.261437	3.29074	0.000999246	0.0643499	ERCC2	0
chr22_23270802_23271663	29.6238	0.782644	0.238138	3.28651	0.00101436	0.0649931	IGLC7	-6037
chr20_32307847_32308681	21.2637	1.06075	0.323312	3.28088	0.00103484	0.0659725	PXMP4	0
chr3_49909505_49911218	53.6513	0.736148	0.224947	3.27254	0.00106585	0.0677572	CAMKV	-2141
chr1_8271672_8272404	27.3013	0.855261	0.261536	3.27015	0.00107492	0.0678455	RP11-431K24.3	-2941
chr19_17413496_17414543	32.2212	0.752999	0.230256	3.27027	0.00107444	0.0678455	ABHD8	0
chr19_17413496_17414543.1	32.2212	0.752999	0.230256	3.27027	0.00107444	0.0678455	MRPL34	-10079
chr12_54752833_54753805	29.0972	0.825383	0.252569	3.26795	0.00108328	0.0680348	RP11-753H16.3	-5389
chr12_54752833_54753805.1	29.0972	0.825383	0.252569	3.26795	0.00108328	0.0680348	RP11-753H16.5	-5258
chr2_122479643_122480455	20.601	0.905754	0.277115	3.26851	0.00108115	0.0680348	MKI67IP	14045
chr12_118498739_118500378	25.1594	1.11457	0.341185	3.26677	0.00108784	0.0681524	WSB2	0
chr1_180990896_180992553	45.8448	0.75691	0.232798	3.25135	0.00114857	0.0713562	STX6	0
chr19_14228477_14229878	49.8324	0.741179	0.228044	3.25016	0.0011534	0.0713785	PRKACA	0
chr12_94103_95844	47.4177	0.650291	0.200631	3.24123	0.00119016	0.073296	AC215219.1	-20781
chr21_43916142_43916835	25.8732	1.25132	0.385988	3.24185	0.00118758	0.073296	AP001625.4	0
chr21_43916142_43916835.1	25.8732	1.25132	0.385988	3.24185	0.00118758	0.073296	RSPH1	0
chr21_43916142_43916835.2	25.8732	1.25132	0.385988	3.24185	0.00118758	0.073296	SLC37A1	-25
chr19_18485040_18485657	36.0604	0.787504	0.243414	3.23525	0.00121537	0.0743072	GDF15	0
chr1_25756449_25757909	35.7694	0.868949	0.269351	3.22608	0.00125499	0.0761789	RHCE	0
chr1_25756449_25757909.1	35.7694	0.868949	0.269351	3.22608	0.00125499	0.0761789	TMEM57	0
chr3_52089044_52091904	58.1925	0.618828	0.191888	3.22494	0.00126	0.0763008	DUSP7	0
chr7_139952545_139953308	31.2227	0.687687	0.213714	3.21779	0.00129181	0.0778555	RNU1-58P	-10876
chr19_6424596_6425769	47.9638	0.651894	0.202751	3.21524	0.00130335	0.0783648	KHSRP	0
chr6_27661656_27662368	18.5003	1.09524	0.340819	3.21354	0.00131109	0.0784783	TRNAI6	-62469
chr19_40696673_40697703	52.7548	1.01625	0.316526	3.21065	0.00132437	0.0788808	MAP3K10	0
chr16_56965429_56966733	34.7993	0.817462	0.255399	3.20073	0.00137081	0.0808876	HERPUD1	0
chr17_56064124_56066646	58.7263	0.608892	0.190313	3.19943	0.00137701	0.0810645	RP11-159D12.2	5566
chr17_56064124_56066646.1	58.7263	0.608892	0.190313	3.19943	0.00137701	0.0810645	RP11-159D12.5	15969
chr17_56064124_56066646.2	58.7263	0.608892	0.190313	3.19943	0.00137701	0.0810645	VEZF1	0
chr19_17444629_17445900	43.9273	0.734075	0.229678	3.19611	0.00139294	0.0816235	ANO8	0
chr19_17444629_17445900.1	43.9273	0.734075	0.229678	3.19611	0.00139294	0.0816235	GTPBP3	0
chr13_99228490_99230123	28.5792	1.11961	0.350891	3.19076	0.00141899	0.0820139	STK24	0
chr13_99228490_99230123.1	28.5792	1.11961	0.350891	3.19076	0.00141899	0.0820139	STK24-AS1	0
chr19_10216322_10217666	64.6445	0.689423	0.216	3.19177	0.00141403	0.0820139	PPAN	0
chr19_10216322_10217666.1	64.6445	0.689423	0.216	3.19177	0.00141403	0.0820139	PPAN-P2RY11	0
chr19_19174374_19174995	28.2558	0.790327	0.247692	3.19077	0.00141894	0.0820139	SLC25A42	0
chr20_44485749_44486679	28.4551	0.781833	0.245805	3.1807	0.0014692	0.0844087	ACOT8	0
chr20_44485749_44486679.1	28.4551	0.781833	0.245805	3.1807	0.0014692	0.0844087	ZSWIM3	0
chr6_150184376_150185609	36.9727	0.82566	0.259604	3.18046	0.00147041	0.0844087	LRP11	0
chr6_150184376_150185609.1	36.9727	0.82566	0.259604	3.18046	0.00147041	0.0844087	RP11-244K5.8	0
chr8_134243338_134244238	39.6869	0.633722	0.19945	3.17736	0.00148624	0.0849942	WISP1-UT1	-2040
chr14_89865887_89866495	27.0912	0.960951	0.302629	3.17534	0.0014966	0.0853329	FOXN3	218999
chr14_89865887_89866495.1	27.0912	0.960951	0.302629	3.17534	0.0014966	0.0853329	RP11-33N16.2	0
chr13_41240539_41241511	17.5725	1.122	0.353427	3.17462	0.00150034	0.0853548	FOXO1	0
chr12_95186251_95187043	23.8195	0.885413	0.279127	3.17208	0.00151352	0.0855289	MIR492	41131
chr3_124597379_124598093	24.9408	0.940603	0.296466	3.17271	0.00151022	0.0855289	ITGB5	8052
chr6_30749433_30750030	28.5982	0.840201	0.265182	3.1684	0.00153282	0.0860445	HCG20	-14832
chr15_64679659_64680494	28.4051	0.972997	0.30727	3.16659	0.00154239	0.0861234	TRIP4	0
chr9_136651521_136653083	35.8348	0.769881	0.24309	3.16706	0.00153989	0.0861234	VAV2	204644
chr2_237779955_237780718	31.8208	0.809967	0.256008	3.16383	0.00155708	0.0865767	AC011286.1	-118539
chr9_5844349_5845288	26.4802	0.80276	0.253765	3.1634	0.00155936	0.0865767	ERMP1	-11232
chr19_38701231_38702087	16.6445	1.06908	0.338609	3.15727	0.00159252	0.0878414	DPF1	18268
chr19_47551247_47552320	43.2798	0.742798	0.23524	3.15762	0.00159061	0.0878414	TMEM160	0
chr1_233462870_233464477	31.7301	0.936997	0.296934	3.15557	0.00160182	0.0881627	MLK4	0
chr7_100270880_100273951	72.0347	0.6215	0.197091	3.15336	0.001614	0.0884492	GNB2	0
chr14_104397654_104398280	22.2181	0.874445	0.278375	3.14125	0.00168226	0.0898059	TDRD9	-2856
chr20_35807195_35808179	29.6004	0.875675	0.278499	3.14426	0.00166505	0.0898059	RPN2	0
chr9_130681604_130682105	18.395	1.26428	0.402466	3.14134	0.00168179	0.0898059	ST6GALNAC4	-2299
chr16_710516_711186	22.0012	0.980845	0.31298	3.13389	0.00172504	0.0911862	WDR90	-11192
chr20_48622151_48623205	24.4471	0.858845	0.27401	3.13436	0.00172228	0.0911862	SNAI1	-22616
chr21_40684251_40686397	72.0304	0.697594	0.222688	3.13261	0.00173258	0.0913944	BRWD1	0
chr21_40684251_40686397.1	72.0304	0.697594	0.222688	3.13261	0.00173258	0.0913944	BRWD1-IT2	490
chr15_102040114_102040805	25.1672	0.66076	0.211515	3.12394	0.00178447	0.0931633	PCSK6	-10072
chr22_23245672_23246529	36.8266	0.666113	0.214123	3.11089	0.00186521	0.0960056	IGLJ3	501
chr1_53703767_53704537	65.0569	1.10712	0.356615	3.10453	0.00190584	0.0978882	MAGOH	0
chr1_53703767_53704537.1	65.0569	1.10712	0.356615	3.10453	0.00190584	0.0978882	RP5-1024G6.5	0
chr6_109761428_109762551	40.2323	0.844271	0.272157	3.10215	0.00192121	0.098008	PPIL6	0
chr6_109761428_109762551.1	40.2323	0.844271	0.272157	3.10215	0.00192121	0.098008	SMPD2	0
chr1_42501228_42501927	16.9823	1.33866	0.431668	3.10114	0.0019278	0.098024	HIVEP3	-116850
chr20_34359655_34360399	28.0342	0.957252	0.309288	3.09502	0.00196798	0.0996676	PHF20	0
chr15_31564873_31565582	21.0014	0.785909	0.25405	3.09353	0.00197792	0.0998717	RP11-16E12.2	-41832
chr3_194545161_194546029	26.2487	0.769854	0.248883	3.09323	0.00197988	0.0998717	AC090505.1	2590

## Sheet: ChIPseqDEseq2CRYBMIM-PBS1hMYBdn
region	baseMean	log2FoldChange	lfcSE	stat	pvalue	padj	gene	distance
chr8_130602251_130606099	171.397	-1.02783	0.103572	-9.92391	3.27664e-23	9.23758e-20	CCDC26	86387
chr18_60765236_60768463	127.895	-0.919626	0.101804	-9.03329	1.6659e-19	3.25146e-16	RP11-299P2.1	50091
chr17_56358700_56359511	26.7037	-1.66208	0.229701	-7.23584	4.62646e-13	5.33578e-10	MPO	-404
chr12_9519712_9520615	46.1872	-1.09367	0.155463	-7.03492	1.9937e-12	1.87356e-09	RP13-735L24.1	0
chr2_60327000_60328107	46.6198	-1.05537	0.157894	-6.68404	2.32439e-11	1.84302e-08	RP11-444A22.1	0
chr21_36935726_36937865	72.4727	-0.82227	0.130372	-6.30709	2.84326e-10	2.0612e-07	MIR802	155148
chr10_104613807_104614508	58.0554	-0.991607	0.162683	-6.09532	1.09217e-09	7.29255e-07	C10orf32	0
chr10_104613807_104614508.1	58.0554	-0.991607	0.162683	-6.09532	1.09217e-09	7.29255e-07	C10orf32-ASMT	0
chr11_109383224_109383853	26.4956	-1.37883	0.226936	-6.07586	1.23322e-09	8.0232e-07	RP11-708B6.2	70517
chr3_196358540_196362067	135.709	-0.594475	0.101427	-5.86113	4.5972e-09	2.53576e-06	LINC01063	0
chr17_54374403_54374985	27.4537	-1.1688	0.211149	-5.53543	3.10464e-08	1.4863e-05	ANKFN1	-143533
chr2_43428337_43429163	20.8246	-1.3477	0.278811	-4.83373	1.34e-06	0.000395347	ZFP36L2	24586
chr1_156765503_156766803	44.2453	-0.83393	0.173756	-4.79944	1.59108e-06	0.000445695	PRCC	-45102
chr2_201559838_201560781	33.4239	-0.949178	0.198594	-4.77948	1.75749e-06	0.000474392	AOX3P	32868
chr2_232409768_232411324	68.6422	-0.608998	0.12738	-4.78095	1.74472e-06	0.000474392	NMUR1	-14562
chr2_129467975_129469516	33.1395	-0.937508	0.201416	-4.65459	3.24619e-06	0.000799666	AC012451.1	-128825
chr20_60600289_60601459	32.5546	-0.9105	0.203776	-4.46815	7.89006e-06	0.00171801	TAF4	39408
chr3_194760583_194761349	22.1949	-1.1427	0.255793	-4.46728	7.92209e-06	0.00171801	XXYLT1	46753
chr12_119087484_119088408	28.4137	-0.988137	0.221531	-4.4605	8.17678e-06	0.00175822	RP11-121J20.1	-955
chr12_11949955_11952343	67.7085	-0.628192	0.143209	-4.38655	1.15164e-05	0.00233765	ETV6	-147168
chr6_40345813_40346294	18.2218	-0.990311	0.22622	-4.37765	1.19965e-05	0.00238611	TDRG1	-43121
chr3_4800766_4802098	42.7182	-0.799677	0.185889	-4.30191	1.69334e-05	0.00320635	ITPR1	-265733
chr11_47613120_47613774	19.9748	-1.15304	0.271773	-4.24266	2.20889e-05	0.00403209	C1QTNF4	2438
chr15_41309375_41309974	17.6284	-1.35571	0.321159	-4.2213	2.42901e-05	0.00430987	INO80	98579
chr15_41309375_41309974.1	17.6284	-1.35571	0.321159	-4.2213	2.42901e-05	0.00430987	RP11-540O11.4	-371
chr2_65172957_65174173	51.2788	-0.613335	0.145673	-4.21036	2.5496e-05	0.00449243	snoU13	-37137
chr6_84259827_84260656	30.2786	-0.795283	0.189855	-4.18889	2.80322e-05	0.00477357	PRSS35	-37571
chr2_179451259_179452253	24.2813	-1.00839	0.242965	-4.15035	3.3197e-05	0.00546953	TTN	219898
chr2_179451259_179452253.1	24.2813	-1.00839	0.242965	-4.15035	3.3197e-05	0.00546953	TTN-AS1	-63366
chr3_1793646_1794447	28.9896	-0.907298	0.220026	-4.12359	3.73011e-05	0.00595246	RP11-204C23.1	234708
chr14_103783305_103784332	29.9984	-0.82599	0.202693	-4.07509	4.59971e-05	0.0071315	RP11-45P15.4	14373
chr8_26043353_26044852	50.4627	-0.700718	0.172838	-4.05419	5.03093e-05	0.0075982	RNA5SP258	-48958
chrX_119396412_119397247	23.9129	-0.942401	0.232715	-4.0496	5.13051e-05	0.00767235	TMEM255A	48145
chr12_88429016_88430049	23.5871	-1.22625	0.303633	-4.03861	5.37678e-05	0.00793169	C12orf29	-1394
chr12_117500678_117501751	37.5856	-0.798486	0.19983	-3.99583	6.44692e-05	0.00924167	TESC	35524
chr8_103209037_103209981	45.3744	-0.695249	0.174689	-3.97993	6.89355e-05	0.00977151	RRM2B	41366
chr1_67217488_67218692	36.8305	-0.781955	0.199817	-3.91336	9.10202e-05	0.012155	TCTEX1D1	0
chr8_110378502_110378910	17.9695	-1.11039	0.285326	-3.89166	9.95593e-05	0.0129789	PKHD1L1	-3797
chrX_102239761_102241325	31.1622	-0.810863	0.208523	-3.8886	0.000100825	0.0130522	LL0XNC01-237H1.3	-44272
chr14_69864424_69865758	62.676	-0.669218	0.173091	-3.86628	0.000110507	0.0139497	ERH	0
chr14_69864424_69865758.1	62.676	-0.669218	0.173091	-3.86628	0.000110507	0.0139497	SLC39A9	0
chr1_155945868_155946776	23.141	-0.958993	0.248197	-3.86384	0.000111618	0.0140194	ARHGEF2	25580
chr21_37109869_37111129	38.2164	-0.786209	0.203541	-3.86265	0.000112164	0.0140194	AF015720.3	-4629
chr1_105010026_105011616	39.5256	-0.780424	0.205982	-3.7888	0.000151379	0.0172239	RP11-364B6.1	-394382
chr20_15590321_15591188	21.4354	-1.16131	0.306408	-3.79009	0.00015059	0.0172239	AL121584.1	-51208
chr13_30945649_30946370	27.5534	-0.761927	0.20142	-3.78279	0.000155082	0.0174884	LINC00426	1667
chr5_66477388_66478663	41.8509	-0.739213	0.197243	-3.74772	0.000178447	0.0196006	CD180	13965
chr3_72667806_72668457	21.9366	-0.915979	0.246287	-3.71916	0.000199886	0.0214903	RNU1-62P	-41965
chr8_142369022_142369399	17.742	-1.15519	0.311509	-3.70836	0.000208604	0.0220538	GPR20	7969
chr14_68867989_68869525	44.9135	-0.663309	0.179376	-3.69786	0.000217426	0.0228911	RAD51B	-581494
chr7_158616565_158617141	20.1779	-1.05909	0.286764	-3.69323	0.00022142	0.0232153	ESYT2	5804
chr11_67452943_67453834	23.9364	-0.86909	0.236006	-3.68249	0.000230966	0.0240433	ALDH3B2	-4272
chr10_31151156_31152843	47.2964	-0.645061	0.175435	-3.67693	0.000236062	0.024348	ZNF438	168012
chr15_42577241_42578114	19.1608	-1.01514	0.276743	-3.66815	0.000244309	0.024895	GANC	-11386
chr1_22250951_22251564	18.3169	-1.05946	0.289526	-3.65931	0.000252896	0.0254632	HSPG2	12227
chr3_176913828_176915966	64.3359	-0.642348	0.175492	-3.66027	0.000251952	0.0254632	TBL1XR1	0
chr17_56361136_56363009	50.2514	-0.628721	0.172381	-3.64727	0.000265036	0.0262686	MPO	-2840
chr6_75952976_75954106	42.6302	-0.735712	0.201914	-3.6437	0.000268746	0.0265326	COX7A2	0
chr2_38049601_38050823	40.0475	-0.678193	0.186434	-3.63771	0.000275073	0.0269476	LINC00211	5753
chr18_13627744_13628668	22.2125	-0.915918	0.25458	-3.59776	0.000320965	0.0303875	LDLRAD4	-408959
chr13_80096645_80097178	27.1447	-0.747428	0.20816	-3.59064	0.000329861	0.0309984	NDFIP2	-3519
chr6_22062868_22063890	38.9608	-0.637686	0.177852	-3.58548	0.000336458	0.0315017	RN7SKP240	21883
chr19_15979809_15980682	37.1925	-0.72244	0.201602	-3.58349	0.000339027	0.0316255	AC004791.2	-4095
chr9_113632097_113632775	20.8294	-0.930712	0.26041	-3.57402	0.000351536	0.0326722	RNU6-432P	32842
chr1_82861037_82861697	26.1953	-0.752454	0.211305	-3.56099	0.000369463	0.0338426	RP11-147G16.1	-134220
chr22_23558608_23559363	26.425	-0.806266	0.226701	-3.55652	0.000375805	0.0342996	BCR	-36212
chr1_229163184_229163865	32.9444	-0.711021	0.20033	-3.54925	0.000386326	0.0349158	RP5-1065P14.2	66788
chr1_188209761_188211142	25.4594	-0.886833	0.250573	-3.53922	0.000401309	0.0358536	RP11-201A3.1	-22231
chr19_850485_851182	28.4032	-0.747442	0.211318	-3.53705	0.000404628	0.0360233	ELANE	0
chr22_43525066_43526251	30.275	-0.829322	0.235316	-3.52429	0.000424618	0.0373532	BIK	-18313
chr14_20966701_20967690	25.4643	-0.819845	0.233062	-3.51771	0.000435293	0.0376952	RNASE10	6006
chr7_92384154_92385126	28.054	-0.808004	0.230206	-3.50992	0.000448249	0.0386851	CDK6	80783
chr9_123341992_123343018	50.1088	-0.671751	0.191576	-3.50644	0.000454142	0.0389288	CDK5RAP2	0
chr11_92495074_92495751	21.4608	-0.849967	0.24277	-3.50112	0.000463308	0.0393394	FAT3	-409368
chr11_92495074_92495751.1	21.4608	-0.849967	0.24277	-3.50112	0.000463308	0.0393394	RP11-203F8.1	4283
chr8_120653682_120654684	52.4048	-0.585669	0.167288	-3.50096	0.000463582	0.0393394	ENPP2	-48434
chr2_62325920_62326707	17.6391	-1.0857	0.31116	-3.48919	0.000484487	0.0405706	AC018462.2	47310
chr2_62325920_62326707.1	17.6391	-1.0857	0.31116	-3.48919	0.000484487	0.0405706	COMMD1	-210062
chr19_840306_841191	32.235	-0.755551	0.216745	-3.48589	0.0004905	0.0408047	PRTN3	0
chr17_43302622_43304016	41.2925	-0.620538	0.178415	-3.47805	0.000505068	0.0414728	FMNL1	-3467
chr13_41578466_41579937	41.4338	-0.633948	0.182977	-3.46464	0.000530951	0.0430409	ELF1	13514
chr1_229673633_229674212	27.3704	-0.809392	0.234069	-3.45792	0.000544364	0.0439877	ABCB10	20231
chr2_111858156_111858919	17.7071	-1.1422	0.332449	-3.43571	0.000591001	0.0463144	AC096670.3	14247
chr9_132708816_132709236	16.5829	-1.01612	0.29577	-3.43552	0.000591411	0.0463144	FNBP1	96211
chr19_39826147_39827008	37.9885	-0.613855	0.17953	-3.41923	0.000627995	0.0477949	GMFG	6005
chr3_17947002_17948199	36.1163	-0.701306	0.206765	-3.3918	0.000694351	0.0509184	TBC1D5	538111
chrX_129216326_129217506	25.3097	-0.795992	0.234935	-3.38814	0.000703688	0.0513066	ELF4	27186
chr5_49930526_49931607	40.184	-0.616772	0.182176	-3.38559	0.000710254	0.0516369	RP11-269M20.3	27494
chr16_75108520_75109826	41.5533	-0.593614	0.176505	-3.36315	0.000770571	0.053744	ZNRF1	-75586
chr11_6656460_6657318	28.273	-0.802862	0.240511	-3.33816	0.00084336	0.057523	DCHS1	19768
chr19_43876653_43877068	22.1461	-0.786503	0.236252	-3.32909	0.000871304	0.0592392	CTC-490G23.4	-3531
chr1_84737091_84737925	31.5356	-0.711842	0.214377	-3.32051	0.000898524	0.0599954	SNORA2	5079
chr20_48888623_48889681	25.4242	-0.768109	0.232162	-3.3085	0.000937966	0.0619766	RP11-290F20.3	-4601
chr16_11330591_11331220	28.4086	-0.648932	0.196329	-3.30533	0.000948662	0.0625205	RMI2	12286
chr5_177913232_177914120	30.2887	-0.717231	0.217124	-3.30333	0.000955452	0.0628049	CTB-26E19.1	-43137
chr8_104426699_104427888	66.6247	-0.623167	0.189556	-3.28751	0.00101076	0.0649265	DCAF13	0
chr8_104426699_104427888.1	66.6247	-0.623167	0.189556	-3.28751	0.00101076	0.0649265	SLC25A32	0
chr20_47892781_47893585	19.4925	-1.02292	0.312636	-3.27193	0.00106818	0.0677572	ZNFX1	1379
chr2_223520311_223521281	38.5745	-0.643839	0.198047	-3.25094	0.00115023	0.0713562	FARSB	0
chr7_74064219_74064922	23.8747	-0.726245	0.224926	-3.22882	0.00124304	0.0758165	GTF2I	7089
chr2_64083173_64083700	17.3324	-0.93294	0.290322	-3.21347	0.00131143	0.0784783	UGP2	-13715
chr19_43071966_43072578	23.0999	-0.812884	0.253074	-3.21205	0.00131793	0.078682	LIPE-AS1	-170687
chr19_6099845_6100881	48.4308	-0.594039	0.185283	-3.20612	0.00134536	0.0797565	RFX2	98660
chr19_48774371_48775329	26.2282	-0.84713	0.265024	-3.19643	0.00139137	0.0816235	CTC-241F20.4	0
chr19_48774371_48775329.1	26.2282	-0.84713	0.265024	-3.19643	0.00139137	0.0816235	ZNF114	-98797
chr8_143282363_143283009	28.765	-0.717178	0.224479	-3.19486	0.001399	0.0817898	LINC00051	-2647
chr2_10037278_10038035	16.6982	-1.01129	0.316864	-3.19157	0.00141502	0.0820139	TAF1B	-53796
chr2_46070150_46071667	40.6312	-0.604705	0.189503	-3.191	0.00141782	0.0820139	PRKCE	156374
chr11_95098358_95098972	19.2187	-0.830865	0.261189	-3.18108	0.00146725	0.0844087	RP11-338H14.1	116598
chr4_153580868_153581881	24.4169	-0.770363	0.24247	-3.17715	0.00148731	0.0849942	TMEM154	19437
chr5_141468616_141469185	23.2366	-0.706182	0.22257	-3.17286	0.00150946	0.0855289	NDFIP1	18885
chr11_35115962_35116616	19.4394	-0.856908	0.270441	-3.16855	0.00153201	0.0860445	AL356215.1	33600
chr8_23150896_23151480	23.9505	-0.762683	0.24066	-3.16912	0.001529	0.0860445	R3HCC1	-5476
chr20_1722099_1722779	21.5078	-0.839417	0.266108	-3.15442	0.00160816	0.0883198	RP4-673D20.3	37614
chr17_64941431_64942124	24.4301	-0.687639	0.218279	-3.15027	0.00163118	0.088625	CACNG4	18902
chr6_45594192_45595024	23.9365	-0.780734	0.247749	-3.15131	0.00162542	0.088625	RUNX2	-298133
chr10_7534059_7535241	21.943	-0.883199	0.281169	-3.14117	0.00168275	0.0898059	RNU6-535P	-5288
chr10_89786992_89788679	42.8194	-0.596532	0.189669	-3.14512	0.00166019	0.0898059	SNORD74	-32540
chr11_64266857_64268086	32.6226	-0.682308	0.217239	-3.14082	0.00168477	0.0898059	AP005273.1	239
chr3_166879331_166880471	37.3511	-0.684985	0.218361	-3.13694	0.00170723	0.0906225	AC092965.1	-136131
chr21_39848249_39849605	29.2992	-0.71801	0.229756	-3.1251	0.00177745	0.0929882	ERG	184014
chr17_8198647_8199294	28.0964	-0.637014	0.204146	-3.12039	0.00180613	0.0941004	SLC25A35	0
chr11_119544651_119545151	19.2057	-0.775681	0.249076	-3.11423	0.00184425	0.0956696	PVRL1	54644
chr3_171692919_171694792	44.3229	-0.627255	0.20145	-3.1137	0.00184756	0.0956696	FNDC3B	62626
chr5_171662236_171662780	17.1728	-1.02578	0.329333	-3.11474	0.0018411	0.0956696	UBTD2	48296
chr5_136707753_136708965	27.316	-0.753345	0.242166	-3.11087	0.0018654	0.0960056	SPOCK1	126073
chr16_10985380_10985978	20.0501	-0.779926	0.251445	-3.10178	0.00192362	0.098008	CIITA	-14326
chr18_45463122_45463830	29.2898	-0.623559	0.201204	-3.09913	0.00194089	0.0984925	SMAD2	-5610

## Sheet: ChIPseDEseq2CRYBMIM-PBS1hCBPup
region	baseMean	log2FoldChange	lfcSE	stat	pvalue	padj	gene	distance
chr19_38703573_38705449	115.322	1.82862	0.108953	16.7836	3.21779e-63	1.43246e-58	DPF1	14906
chr17_76319625_76321946	113.878	1.56782	0.0987581	15.8754	9.38771e-57	2.08956e-52	AC061992.2	-7816
chr19_13956720_13959270	184.661	1.20731	0.0826675	14.6045	2.63042e-48	2.92746e-44	MIR23A	-9247
chr1_151913502_151915559	64.7237	2.06651	0.145111	14.2409	5.10768e-46	4.54758e-42	THEM4	-31218
chr19_6065453_6067842	136.063	1.47088	0.10542	13.9526	3.03541e-44	1.68909e-40	RFX2	131699
chr1_9319760_9320977	33.8304	2.05832	0.153492	13.41	5.28713e-41	2.35367e-37	H6PD	-24927
chr7_100767742_100770526	73.6072	1.62256	0.132827	12.2156	2.56713e-34	9.52343e-31	SERPINE1	0
chr5_671727_673587	54.2761	1.67508	0.140934	11.8856	1.40633e-32	4.81581e-29	TPPP	19924
chr1_151916572_151919563	86.8616	1.51522	0.133243	11.3718	5.77637e-30	1.83676e-26	THEM4	-34288
chr12_13253688_13254879	72.4609	1.42974	0.128229	11.1499	7.17037e-29	1.77335e-25	GSG1	1701
chr19_54682954_54684721	40.4214	2.11054	0.190442	11.0823	1.52861e-28	3.40246e-25	MBOAT7	8946
chr14_75743175_75746170	106.242	1.07222	0.106392	10.078	6.91342e-24	1.23106e-20	FOS	0
chr17_9920720_9923652	65.8628	1.41284	0.141869	9.95878	2.30889e-23	3.95326e-20	GAS7	178217
chr15_101261152_101263014	45.075	1.71002	0.184811	9.25278	2.18737e-20	2.70487e-17	RP11-66B24.5	-4699
chr17_72508208_72511428	90.8276	1.24069	0.134817	9.20279	3.48778e-20	4.19637e-17	CD300LB	16186
chr10_77809420_77810353	50.4091	1.3595	0.150433	9.03725	1.60665e-19	1.83393e-16	C10orf11	-402154
chr14_90377916_90379639	53.1137	1.50355	0.166471	9.03188	1.68741e-19	1.87796e-16	EFCAB11	41483
chr14_90377916_90379639.1	53.1137	1.50355	0.166471	9.03188	1.68741e-19	1.87796e-16	RP11-33N16.3	41365
chr1_214612079_214615268	78.0094	1.20544	0.135347	8.9063	5.27633e-19	5.59253e-16	RP11-176D17.3	-81121
chr14_89865887_89866495	27.0912	2.0864	0.234525	8.89627	5.7757e-19	5.97946e-16	FOXN3	218999
chr14_89865887_89866495.1	27.0912	2.0864	0.234525	8.89627	5.7757e-19	5.97946e-16	RP11-33N16.2	0
chr7_104583964_104586091	78.6159	1.17266	0.132455	8.85326	8.50021e-19	8.60009e-16	RP11-325F22.2	-2312
chr13_52218907_52220277	40.5869	1.50848	0.178242	8.4631	2.60364e-17	2.18691e-14	WDFY2	-60264
chr10_17257515_17259382	70.0362	1.18967	0.142473	8.35016	6.81695e-17	5.23224e-14	VIM-AS1	12603
chr19_41802223_41804810	88.747	0.982187	0.117737	8.34224	7.28992e-17	5.50043e-14	HNRNPUL1	-33823
chr10_133574729_133576765	62.0364	1.16185	0.140697	8.2578	1.48378e-16	1.08284e-13	AL450307.1	45771
chr19_17854522_17855688	33.8084	1.6089	0.199785	8.05318	8.0671e-16	5.44126e-13	FCHO1	2839
chr3_190334275_190337118	86.3452	1.01166	0.126364	8.00591	1.18585e-15	7.87916e-13	RN7SKP296	22834
chr8_90848447_90850046	66.4147	1.20305	0.15042	7.99794	1.26518e-15	8.25103e-13	RNU6-925P	63007
chr10_3915190_3917155	51.4053	1.28997	0.163138	7.90726	2.63117e-15	1.58286e-12	RP11-464C19.2	-39049
chr3_151974981_151977341	76.3858	1.10105	0.140468	7.83839	4.56353e-15	2.57158e-12	MBNL1	9354
chr10_3845832_3848458	59.6687	1.23717	0.158068	7.82682	5.00378e-15	2.75004e-12	KLF6	-18365
chr1_150583702_150586525	81.7151	0.951888	0.121839	7.81265	5.59987e-15	3.04011e-12	ENSA	15518
chr5_172197387_172199848	78.9149	0.965588	0.123977	7.78842	6.78502e-15	3.63914e-12	DUSP1	0
chr5_172197387_172199848.1	78.9149	0.965588	0.123977	7.78842	6.78502e-15	3.63914e-12	RP11-779O18.3	-7405
chr1_159892551_159895718	107.774	0.870408	0.111949	7.77506	7.54119e-15	3.99656e-12	TAGLN2	0
chr2_232468816_232470035	49.7545	1.24751	0.165866	7.52119	5.42806e-14	2.74592e-11	C2orf57	-11242
chr18_13381370_13382964	31.9076	1.53711	0.20965	7.33181	2.27062e-13	1.01081e-10	LDLRAD4	-162585
chr15_86210630_86212086	60.0654	1.04536	0.143477	7.2859	3.19539e-13	1.35476e-10	AKAP13	-286760
chr15_86210630_86212086.1	60.0654	1.04536	0.143477	7.2859	3.19539e-13	1.35476e-10	RP11-815J21.4	2094
chr19_45953289_45955146	106.049	0.749023	0.102794	7.28663	3.17815e-13	1.35476e-10	FOSB	16107
chr5_172191984_172193492	44.5804	1.33483	0.185896	7.18052	6.94445e-13	2.81042e-10	RP11-779O18.3	-2002
chr1_4066957_4068238	35.0206	1.46003	0.203918	7.15988	8.07503e-13	3.22374e-10	RP13-614K11.2	-57917
chr14_105947238_105949025	63.4717	0.919329	0.128411	7.15927	8.1106e-13	3.22374e-10	CRIP1	3629
chr11_35061137_35062843	53.7609	1.10654	0.155065	7.13597	9.61047e-13	3.67026e-10	PDHX	-54958
chr14_75725334_75726545	78.89	0.855315	0.119868	7.13546	9.64621e-13	3.67026e-10	RP11-293M10.1	9442
chr14_75725334_75726545.1	78.89	0.855315	0.119868	7.13546	9.64621e-13	3.67026e-10	RP11-293M10.2	0
chr19_54711368_54712571	97.5391	0.782057	0.109834	7.12033	1.07671e-12	4.02788e-10	RPS9	-6759
chr19_13960723_13962705	77.0165	0.922906	0.129662	7.1178	1.0966e-12	4.06812e-10	NANOS3	10172
chr20_47526795_47527595	27.7552	1.5863	0.224453	7.06738	1.57883e-12	5.76106e-10	ARFGEF2	10832
chr20_17538829_17539817	32.3207	1.53007	0.216871	7.05523	1.72314e-12	6.2365e-10	BFSP1	10049
chr17_79424428_79425216	14.6026	2.0694	0.296497	6.97949	2.96263e-12	1.04673e-09	RP11-1055B8.8	3748
chr17_10017663_10019015	61.5256	0.988591	0.141794	6.97204	3.12375e-12	1.09496e-09	GAS7	82854
chr21_35923819_35926340	62.436	1.04471	0.15019	6.95594	3.50227e-12	1.21805e-09	RCAN1	-24671
chr19_14115684_14118076	175.473	0.636038	0.0917411	6.93297	4.12106e-12	1.37938e-09	RFX1	0
chr2_109228564_109229515	31.4421	1.41977	0.206358	6.88014	5.97934e-12	1.94294e-09	LIMS1	-23798
chr3_41012266_41013663	53.0201	1.08457	0.158169	6.85703	7.03061e-12	2.25167e-09	RP11-520A21.1	0
chr11_122954297_122954849	18.7647	2.08935	0.305185	6.84617	7.58533e-12	2.41197e-09	CLMP	0
chr3_49909505_49911218	53.6513	0.9464	0.140285	6.74628	1.51682e-11	4.53183e-09	CAMKV	-2141
chr19_7555897_7557766	77.6013	0.951193	0.143623	6.62284	3.52364e-11	9.99119e-09	PEX11G	4570
chr22_23863388_23865152	42.9193	1.00586	0.152432	6.59874	4.14664e-11	1.15642e-08	AP000345.4	-7599
chr14_105940091_105941537	26.0405	1.43141	0.217079	6.59398	4.28187e-11	1.18395e-08	CRIP2	-793
chrX_106917108_106919618	58.1953	0.998388	0.152016	6.56766	5.11117e-11	1.3874e-08	PRPS1	-45372
chr16_90098026_90099441	39.4775	1.15794	0.178895	6.47274	9.6239e-11	2.55016e-08	GAS8	-9019
chr2_235392204_235393169	40.3867	1.15191	0.178068	6.46895	9.86853e-11	2.59951e-08	ARL4C	12529
chr11_65254845_65255842	23.9809	1.55965	0.241206	6.46607	1.00586e-10	2.62369e-08	MALAT1	9391
chr14_21555349_21556218	29.1579	1.43103	0.222407	6.43428	1.24061e-10	3.15589e-08	ARHGEF40	-16921
chr21_35898831_35899712	27.1253	1.48429	0.231534	6.41071	1.44846e-10	3.62254e-08	RCAN1	0
chr2_69930197_69932398	64.2438	0.950612	0.14858	6.39799	1.57431e-10	3.89353e-08	AC092431.3	8582
chr2_69930197_69932398.1	64.2438	0.950612	0.14858	6.39799	1.57431e-10	3.89353e-08	ANXA4	-58641
chr10_17044012_17045533	37.211	1.30113	0.205321	6.33705	2.34201e-10	5.66626e-08	CUBN	126298
chr18_77153179_77156879	85.0745	0.729269	0.115242	6.32813	2.48144e-10	5.93905e-08	NFATC1	0
chr16_29167786_29169684	56.9978	0.889078	0.141392	6.28805	3.21469e-10	7.49258e-08	RP11-426C22.5	-40339
chr4_40578948_40579709	31.3146	1.24526	0.199215	6.25086	4.08196e-10	9.22418e-08	RBM47	52932
chr19_11202079_11204322	79.4454	0.889154	0.142355	6.24603	4.21011e-10	9.37108e-08	LDLR	-2042
chr19_6056709_6057911	58.4451	0.947101	0.15171	6.24285	4.29669e-10	9.51621e-08	RFX2	141630
chr17_76325189_76326163	30.1499	1.2805	0.20557	6.22902	4.69367e-10	1.02768e-07	AC061992.2	-13380
chr8_116083535_116084908	45.7412	1.13966	0.182998	6.22773	4.73246e-10	1.02768e-07	AF178030.2	436921
chr9_34986287_34987016	26.9324	1.43464	0.230348	6.22815	4.71967e-10	1.02768e-07	DNAJB5	2622
chr13_114064079_114066393	59.6114	0.954504	0.153299	6.22643	4.77198e-10	1.03123e-07	ADPRHL1	41447
chr4_719705_720822	29.1158	1.3876	0.222909	6.22495	4.81715e-10	1.03597e-07	PCGF3	-20152
chr6_68605173_68606831	38.2113	1.15583	0.186177	6.20825	5.35783e-10	1.1304e-07	RP11-301G19.1	-5942
chr14_65120832_65121986	42.0269	1.16083	0.187084	6.20487	5.47427e-10	1.14952e-07	PLEKHG3	49168
chr10_121543126_121546298	83.8884	0.751652	0.121181	6.20273	5.54921e-10	1.15979e-07	INPP5F	-57518
chr18_57542810_57545169	51.0722	0.992832	0.161174	6.15999	7.27495e-10	1.48559e-07	PMAIP1	22011
chr21_47238149_47239386	44.4725	1.16119	0.188633	6.15579	7.47051e-10	1.51856e-07	AL592528.1	16948
chr1_28189615_28191206	46.3402	0.936203	0.152316	6.14646	7.92305e-10	1.58879e-07	THEMIS2	7849
chr9_72694731_72696560	42.6977	1.08249	0.176597	6.12974	8.80247e-10	1.75722e-07	MAMDC2	-36235
chr12_123130910_123131894	61.5875	1.02224	0.167434	6.10532	1.02596e-09	2.01202e-07	RP11-324E6.6	39778
chr8_126231260_126233181	79.2972	0.834182	0.136935	6.09182	1.11637e-09	2.1514e-07	NSMCE2	-127166
chr6_167503515_167506629	72.3003	0.811554	0.133386	6.08426	1.17028e-09	2.24557e-07	RP11-517H2.6	-90623
chr9_72708412_72709285	18.3386	1.64216	0.270134	6.07906	1.20891e-09	2.30974e-07	MAMDC2	-49916
chr9_72708412_72709285.1	18.3386	1.64216	0.270134	6.07906	1.20891e-09	2.30974e-07	MAMDC2-AS1	81520
chr9_3524938_3527835	93.1989	0.627435	0.103449	6.06517	1.31818e-09	2.49708e-07	RFX3	0
chr9_3524938_3527835.1	93.1989	0.627435	0.103449	6.06517	1.31818e-09	2.49708e-07	RP11-509J21.1	0
chr8_102821893_102822577	36.3654	1.10639	0.182667	6.05688	1.38785e-09	2.61792e-07	NCALD	-18688
chr3_167741973_167743665	61.9854	0.956693	0.158148	6.04934	1.45442e-09	2.72045e-07	GOLIM4	69468
chr1_214617873_214620750	71.541	0.830269	0.138566	5.99186	2.07455e-09	3.76949e-07	RP11-176D17.3	-86915
chr2_157188240_157191497	91.796	0.740853	0.123812	5.98369	2.18133e-09	3.91558e-07	NR4A2	7364
chr8_74789283_74791608	92.5414	0.736065	0.123116	5.97862	2.2503e-09	3.9911e-07	RP11-463D19.2	0
chr8_74789283_74791608.1	92.5414	0.736065	0.123116	5.97862	2.2503e-09	3.9911e-07	UBE2W	0
chr17_76337616_76339638	53.8852	0.799149	0.134006	5.96353	2.46843e-09	4.29246e-07	AC061992.2	-25807
chr15_79132915_79134039	33.6037	1.12945	0.189718	5.95329	2.62809e-09	4.53468e-07	MORF4L1	-30087
chr10_28622165_28624449	52.8355	0.963872	0.162554	5.92956	3.03745e-09	5.2007e-07	AC022021.1	-22384
chr17_12759272_12761854	50.0978	0.986544	0.166858	5.91249	3.36968e-09	5.7255e-07	MIR1269B	58806
chr8_37738311_37740539	90.177	0.757958	0.128873	5.88142	4.06766e-09	6.7722e-07	RAB11FIP1	16447
chr8_26465911_26467716	91.9101	0.67895	0.115579	5.87435	4.245e-09	7.02507e-07	DPYSL2	-94121
chr13_110787092_110787992	20.2686	1.58816	0.271176	5.85657	4.72512e-09	7.64903e-07	RN7SL783P	-36594
chr10_97527501_97528215	25.9479	1.21347	0.207912	5.83648	5.33141e-09	8.32766e-07	ENTPD1	-55966
chr10_97527501_97528215.1	25.9479	1.21347	0.207912	5.83648	5.33141e-09	8.32766e-07	ENTPD1-AS1	321781
chr3_15837148_15840365	85.0609	0.779097	0.133514	5.83531	5.36893e-09	8.35694e-07	ANKRD28	60914
chr8_88928797_88929636	28.1919	1.21926	0.209065	5.83196	5.47786e-09	8.46729e-07	DCAF4L2	-42501
chr17_9249122_9250780	42.563	1.04801	0.179941	5.82418	5.73953e-09	8.81057e-07	RP11-85B7.4	-62632
chr5_142381298_142382893	82.6795	0.735445	0.126441	5.81649	6.0095e-09	9.1933e-07	ARHGAP26	-231350
chr20_51039201_51042098	52.6854	0.872272	0.150451	5.7977	6.72289e-09	1.01452e-06	RP4-583K8.1	30061
chr15_70315273_70316621	39.136	1.03758	0.179004	5.79638	6.77621e-09	1.01911e-06	MIR629	55187
chr12_12713804_12716056	48.1791	0.860158	0.148519	5.79157	6.97331e-09	1.04522e-06	DUSP16	0
chr17_41170194_41171666	31.8116	1.20461	0.208605	5.77459	7.71427e-09	1.1524e-06	VAT1	625
chr17_12594213_12594926	13.4784	2.14741	0.372952	5.75787	8.51803e-09	1.26399e-06	AC005358.3	14527
chr17_12594213_12594926.1	13.4784	2.14741	0.372952	5.75787	8.51803e-09	1.26399e-06	MYOCD	-24908
chr8_126285280_126286541	42.2882	1.22382	0.212605	5.75629	8.59811e-09	1.27163e-06	NSMCE2	-181186
chr11_62318976_62319839	30.5943	1.25385	0.219011	5.72503	1.03415e-08	1.51938e-06	RP11-864I4.4	-5506
chr2_158324989_158326473	51.9873	0.960664	0.167863	5.72292	1.04711e-08	1.53337e-06	CYTIP	19001
chr13_42951650_42953114	48.5087	0.901324	0.158132	5.69982	1.19934e-08	1.72679e-06	AKAP11	-105362
chr8_125715000_125715766	33.3947	1.20925	0.212213	5.69828	1.21023e-08	1.72679e-06	MTSS1	24905
chr9_99416657_99417942	31.8171	1.09458	0.192077	5.69865	1.20757e-08	1.72679e-06	AAED1	0
chr15_55513043_55515537	64.2793	0.883712	0.155581	5.68007	1.34637e-08	1.89074e-06	RAB27A	95772
chr1_151964752_151966906	49.8637	0.894119	0.157517	5.67634	1.37611e-08	1.92642e-06	S100A10	0
chr10_115962660_115963284	18.0369	1.55962	0.275484	5.6614	1.50146e-08	2.06937e-06	TDRD1	-23632
chr2_85931752_85934895	83.234	0.715626	0.126861	5.64102	1.69042e-08	2.30129e-06	GNLY	-10272
chr19_38701231_38702087	16.6445	1.62861	0.289421	5.62712	1.8324e-08	2.47942e-06	DPF1	18268
chr6_134734274_134734938	22.053	1.32198	0.235551	5.61227	1.99686e-08	2.66151e-06	LINC01010	23916
chr8_4099854_4101841	93.227	0.682909	0.121958	5.59952	2.14941e-08	2.83932e-06	CSMD1	750654
chr15_76015736_76016682	26.4955	1.28898	0.23156	5.5665	2.59913e-08	3.35872e-06	ODF3L1	0
chr3_14185517_14186571	35.2268	1.03911	0.186707	5.56544	2.61494e-08	3.36443e-06	AC093495.4	0
chr3_14185517_14186571.1	35.2268	1.03911	0.186707	5.56544	2.61494e-08	3.36443e-06	RP11-434D12.1	-8801
chr19_15054282_15055056	32.3294	1.19393	0.214716	5.56049	2.69016e-08	3.45124e-06	OR7C2	-1982
chr16_31313119_31313863	24.4476	1.43227	0.258528	5.54008	3.02334e-08	3.81275e-06	ITGAM	-41809
chr19_50316157_50317273	50.7332	0.858043	0.155688	5.51129	3.56212e-08	4.42946e-06	FUZ	0
chr7_68649277_68649806	22.1016	1.29096	0.234409	5.50731	3.64358e-08	4.51814e-06	RP11-3P22.1	4500
chr11_81690445_81691133	14.9715	1.70278	0.309396	5.50355	3.72212e-08	4.5925e-06	RP11-179A16.1	423823
chr11_81690445_81691133.1	14.9715	1.70278	0.309396	5.50355	3.72212e-08	4.5925e-06	RP11-876F14.1	-8410
chr7_21619753_21620509	24.2672	1.30774	0.238437	5.48466	4.14269e-08	4.98433e-06	DNAH11	-36921
chr10_17065360_17066763	34.6406	1.20919	0.220978	5.47198	4.45046e-08	5.32584e-06	CUBN	105068
chr14_88094287_88095442	37.8727	1.11056	0.203079	5.4686	4.53611e-08	5.3849e-06	CTD-2007A10.1	26197
chr7_17273406_17274852	52.0576	0.935474	0.171335	5.4599	4.76398e-08	5.62541e-06	AHR	63394
chr5_40484749_40488448	116.736	0.620238	0.113875	5.44665	5.13276e-08	5.98154e-06	AC108105.1	-164330
chr8_90769183_90771448	70.618	0.717648	0.13191	5.44046	5.31443e-08	6.161e-06	RIPK2	0
chr8_90769183_90771448.1	70.618	0.717648	0.13191	5.44046	5.31443e-08	6.161e-06	RP11-37B2.1	0
chr3_186251772_186252674	23.7361	1.38468	0.25492	5.43184	5.5776e-08	6.4493e-06	CRYGS	11818
chr3_31443562_31444060	15.879	1.61157	0.296853	5.42885	5.67196e-08	6.53206e-06	AC099540.1	-6134
chr2_178483028_178483941	36.5835	0.878791	0.162523	5.40717	6.40286e-08	7.23441e-06	AC073834.3	-15212
chr2_178483028_178483941.1	36.5835	0.878791	0.162523	5.40717	6.40286e-08	7.23441e-06	TTC30A	0
chr1_247570386_247571900	37.5813	1.06548	0.197068	5.40663	6.42233e-08	7.2358e-06	NLRP3	7558
chr14_57428730_57430589	40.0012	1.0326	0.191242	5.39947	6.68393e-08	7.45736e-06	OTX2-AS1	-148830
chr1_114470855_114474424	101.427	0.589581	0.109315	5.3934	6.91383e-08	7.65629e-06	HIPK1	0
chr1_114470855_114474424.1	101.427	0.589581	0.109315	5.3934	6.91383e-08	7.65629e-06	RP5-1073O3.7	0
chr17_7896196_7896657	13.7831	1.47426	0.273563	5.3891	7.08101e-08	7.82197e-06	GUCY2D	9255
chr2_47298191_47300560	87.4811	0.618734	0.114843	5.38763	7.13929e-08	7.86682e-06	AC073283.7	-3231
chr2_47298191_47300560.1	87.4811	0.618734	0.114843	5.38763	7.13929e-08	7.86682e-06	C2orf61	81867
chr2_47298191_47300560.2	87.4811	0.618734	0.114843	5.38763	7.13929e-08	7.86682e-06	RP11-761B3.1	103091
chr2_47298191_47300560.3	87.4811	0.618734	0.114843	5.38763	7.13929e-08	7.86682e-06	TTC7A	-154896
chr9_36154350_36155044	22.5921	1.40381	0.260657	5.38567	7.21769e-08	7.91404e-06	GLIPR2	-17612
chr20_5639549_5640606	32.3575	1.18354	0.21989	5.38242	7.34902e-08	8.03824e-06	GPCPD1	-47877
chr10_17067375_17068095	24.3315	1.33468	0.248551	5.36982	7.88141e-08	8.55748e-06	CUBN	103736
chr10_16759516_16760180	24.0808	1.609	0.300417	5.35588	8.51413e-08	9.15516e-06	RSU1	99348
chr17_15576930_15578105	30.9774	1.19129	0.222463	5.35501	8.55498e-08	9.17692e-06	TRIM16	9510
chr12_13349022_13349837	25.4732	1.35598	0.253376	5.35166	8.71528e-08	9.3264e-06	EMP1	0
chr3_151913800_151919230	108.328	0.630062	0.118161	5.33222	9.70194e-08	1.02589e-05	RP11-246A10.1	-44287
chr8_125763340_125764727	57.5064	0.761068	0.143186	5.31524	1.06517e-07	1.11836e-05	MTSS1	-22670
chr2_47229533_47230114	19.34	1.5223	0.28675	5.30879	1.10355e-07	1.14515e-05	TTC7A	-86238
chr6_11318271_11319201	25.4563	1.41466	0.266463	5.30904	1.10205e-07	1.14515e-05	NEDD9	63381
chr2_240143136_240146034	77.611	0.667338	0.125851	5.30259	1.14171e-07	1.18199e-05	HDAC4	176610
chr10_74495964_74496660	18.0223	1.65906	0.314116	5.28169	1.27999e-07	1.30991e-05	MCU	-44076
chr3_10019813_10020304	12.7288	1.87908	0.356065	5.27737	1.31054e-07	1.32896e-05	EMC3	8501
chr19_50320423_50321803	51.492	0.828457	0.157214	5.26963	1.367e-07	1.37681e-05	MED25	0
chr15_93374666_93375961	44.2199	0.971227	0.18446	5.26526	1.39993e-07	1.40678e-05	FAM174B	-21575
chr2_28870159_28871308	25.0824	1.25123	0.238207	5.2527	1.49882e-07	1.48935e-05	AC074011.2	16099
chr17_9253187_9254096	37.2917	1.09067	0.207662	5.25215	1.50332e-07	1.4905e-05	RP11-85B7.4	-66697
chr7_127274765_127275587	34.2579	1.07699	0.20509	5.2513	1.51031e-07	1.49409e-05	AC073934.6	16480
chr14_52778016_52778915	42.6932	1.00133	0.190936	5.24433	1.56849e-07	1.54822e-05	PTGER2	2108
chr1_28437100_28438462	29.3699	1.10651	0.211394	5.23436	1.65562e-07	1.62342e-05	EYA3	-21893
chr1_186818273_186819310	36.6611	1.06666	0.204116	5.22577	1.73431e-07	1.69312e-05	PLA2G4A	-20189
chr18_47002910_47003684	25.3665	1.33272	0.2552	5.22226	1.76749e-07	1.72174e-05	RP11-110H1.4	8836
chr2_64439343_64440584	40.1237	1.12535	0.215711	5.21691	1.81928e-07	1.75681e-05	AC074289.1	-68971
chr2_216781120_216781860	21.1212	1.38056	0.264948	5.21069	1.8814e-07	1.80895e-05	AC093382.1	24583
chr7_92262427_92265305	85.0125	0.731051	0.140342	5.20906	1.89795e-07	1.82093e-05	CDK6	200604
chr7_92268538_92269719	54.4372	0.909479	0.174829	5.20212	1.9703e-07	1.87019e-05	CDK6	196190
chr1_84283878_84285102	26.2213	1.20489	0.231859	5.19666	2.02905e-07	1.91372e-05	RP11-475O6.1	41578
chr16_88152360_88153102	29.5847	1.19161	0.229286	5.19705	2.0248e-07	1.91372e-05	RP11-863P13.4	-17795
chr15_86192116_86193372	30.1898	1.22898	0.236882	5.18815	2.12393e-07	1.99475e-05	AKAP13	-268246
chr15_86192116_86193372.1	30.1898	1.22898	0.236882	5.18815	2.12393e-07	1.99475e-05	RP11-815J21.4	20808
chr6_25177860_25180600	65.768	0.747527	0.144103	5.18745	2.1319e-07	1.99802e-05	RNY5P5	12041
chr1_217803994_217804988	26.1594	1.02513	0.198196	5.17231	2.31222e-07	2.14299e-05	GPATCH2	0
chr1_217803994_217804988.1	26.1594	1.02513	0.198196	5.17231	2.31222e-07	2.14299e-05	SPATA17	0
chr15_50387689_50390039	42.4939	0.900765	0.174297	5.16799	2.36626e-07	2.18545e-05	ATP8B4	21381
chr1_115641557_115642533	36.5408	0.929977	0.180091	5.16393	2.41814e-07	2.21499e-05	RP4-666F24.3	0
chr1_226914533_226915263	18.3904	1.65679	0.321972	5.14575	2.66459e-07	2.40608e-05	ITPKB	11762
chr20_35572546_35573657	29.758	1.04025	0.202605	5.13437	2.83089e-07	2.54078e-05	SAMHD1	6590
chr21_35882755_35885727	57.6191	0.777825	0.151566	5.13192	2.86797e-07	2.56888e-05	KCNE1	0
chr18_57549052_57550003	32.0635	1.11689	0.217858	5.1267	2.94864e-07	2.63564e-05	PMAIP1	17177
chr2_223569643_223570131	13.1093	1.70874	0.333325	5.12634	2.95434e-07	2.63564e-05	MOGAT1	-33139
chr8_116068133_116069080	49.0695	0.854782	0.167497	5.10328	3.33821e-07	2.9369e-05	AF178030.2	452749
chr1_224019505_224020407	30.1899	1.18152	0.231697	5.09941	3.40719e-07	2.97408e-05	TP53BP2	13268
chr21_35942107_35943164	32.0464	1.06725	0.209334	5.09833	3.4266e-07	2.98113e-05	RCAN1	-42959
chr8_105290513_105291482	39.7394	0.940151	0.184646	5.09164	3.54983e-07	3.07447e-05	DCSTAMP	69287
chr9_135522640_135523267	18.7694	1.86022	0.366225	5.07945	3.7853e-07	3.23436e-05	DDX31	22522
chr19_40323758_40325152	52.9589	0.714083	0.140841	5.07013	3.97548e-07	3.38387e-05	DYRK1B	0
chr19_40323758_40325152.1	52.9589	0.714083	0.140841	5.07013	3.97548e-07	3.38387e-05	FBL	11903
chr7_155382865_155384538	53.5499	0.771107	0.152736	5.04862	4.45014e-07	3.73083e-05	AC009403.2	52558
chr6_161694281_161695525	33.7178	1.01593	0.201669	5.03763	4.7133e-07	3.91459e-05	AGPAT4	0
chr3_2568509_2569820	46.176	0.868449	0.172645	5.03025	4.89833e-07	4.03066e-05	CNTN4	-427900
chr22_30838026_30838923	38.9297	0.952852	0.189665	5.02387	5.06399e-07	4.15163e-05	RP4-539M6.22	-6496
chr17_6734782_6735372	17.5038	1.40788	0.281366	5.00372	5.62357e-07	4.54346e-05	TEKT1	0
chr8_74963828_74965027	52.9607	0.777663	0.155621	4.99717	5.81771e-07	4.65804e-05	RP11-6I2.3	0
chr16_90060967_90062736	57.092	0.77683	0.155506	4.9955	5.86832e-07	4.68172e-05	AFG3L1P	-21943
chr13_42031072_42033477	54.9377	0.775008	0.156175	4.96244	6.96141e-07	5.4947e-05	RGCC	0
chr1_156075321_156076713	46.6453	0.780249	0.157281	4.96086	7.01826e-07	5.52977e-05	LMNA	-22953
chr12_110704659_110705339	18.4314	1.51848	0.306299	4.95749	7.14079e-07	5.61637e-05	ATP2A2	28457
chr7_104596957_104598234	47.3429	0.834805	0.168521	4.95371	7.28126e-07	5.70668e-05	LINC01004	55258
chr7_104596957_104598234.1	47.3429	0.834805	0.168521	4.95371	7.28126e-07	5.70668e-05	RP11-325F22.2	-15305
chr8_131288730_131289878	42.2586	0.828631	0.167429	4.94914	7.4544e-07	5.83211e-05	ASAP1	166029
chr7_158610776_158611894	52.5955	0.761721	0.154129	4.9421	7.72854e-07	6.03599e-05	ESYT2	11051
chr19_19366810_19367803	25.0372	1.1963	0.242334	4.93656	7.95131e-07	6.17746e-05	AC138430.4	16376
chr19_19366810_19367803.1	25.0372	1.1963	0.242334	4.93656	7.95131e-07	6.17746e-05	HAPLN4	5803
chr9_35102649_35103963	30.1365	0.959149	0.194518	4.93091	8.18486e-07	6.33679e-05	STOML2	0
chr8_120613225_120614258	65.2983	0.725673	0.147258	4.92789	8.31217e-07	6.41305e-05	ENPP2	-7977
chr20_5622951_5623991	33.6991	0.985911	0.200114	4.92676	8.36063e-07	6.43928e-05	GPCPD1	-31279
chr3_71080327_71080920	12.338	2.05436	0.417947	4.91537	8.86148e-07	6.76649e-05	FOXP1	551985
chr22_43329323_43330542	37.4254	0.960413	0.195436	4.91421	8.91393e-07	6.78327e-05	PACSIN2	80610
chr19_16437676_16440012	86.3272	0.646167	0.131556	4.91174	9.02717e-07	6.83439e-05	KLF2	-2049
chr15_66096408_66097881	41.5619	0.862312	0.175685	4.90827	9.18829e-07	6.91462e-05	RAB11A	-11624
chr6_20168865_20170083	26.0189	1.20022	0.245091	4.89704	9.72907e-07	7.26693e-05	MBOAT1	42548
chr7_105985153_105988247	74.1571	0.71842	0.147122	4.88315	1.04405e-06	7.72063e-05	RP11-22N19.2	-59228
chr14_89805970_89807118	22.0015	1.35741	0.278397	4.8758	1.08369e-06	7.96081e-05	FOXN3	278376
chr7_649893_650729	17.0455	1.34509	0.27628	4.86857	1.12408e-06	8.21687e-05	PRKAR1B	116559
chr12_56240717_56242909	57.394	0.757423	0.155645	4.86635	1.13676e-06	8.29594e-05	MMP19	-3983
chr19_31802735_31803622	37.0866	0.923067	0.189808	4.86317	1.1552e-06	8.40296e-05	TSHZ3	36832
chr15_66111064_66111822	42.1877	0.889222	0.183255	4.85238	1.21992e-06	8.78754e-05	RAB11A	-26280
chr10_129862474_129863436	42.9543	0.844108	0.174132	4.84753	1.2501e-06	8.99045e-05	PTPRE	-157150
chr6_158181863_158182973	35.0588	1.11489	0.230207	4.843	1.27892e-06	9.16808e-05	SNX9	61323
chr10_21386101_21387223	33.2773	0.927291	0.191613	4.83939	1.30237e-06	9.29128e-05	NEBL	75894
chr20_9195129_9195866	24.6139	1.18917	0.245763	4.83871	1.30687e-06	9.30846e-05	PLCB4	92581
chrX_13269272_13269791	12.2087	1.92734	0.399238	4.82754	1.38233e-06	9.72149e-05	GS1-600G8.5	51721
chr3_71112693_71114900	39.0531	0.873911	0.181141	4.82447	1.40377e-06	9.85672e-05	FOXP1	518005
chr17_78009102_78010919	39.4155	0.744067	0.154307	4.82199	1.42133e-06	9.94863e-05	CCDC40	0
chr17_78009102_78010919.1	39.4155	0.744067	0.154307	4.82199	1.42133e-06	9.94863e-05	TBC1D16	0
chr2_28844257_28844953	24.4256	1.20603	0.250391	4.81656	1.46051e-06	0.000101908	PLB1	-125320
chr10_3078164_3078945	24.6641	1.15509	0.240233	4.80819	1.52301e-06	0.000105772	RP11-118K6.2	-25442
chr17_34409330_34410574	48.4718	0.778709	0.162088	4.80425	1.55332e-06	0.000107299	AC069363.1	-9105
chr6_144126860_144127837	27.7543	1.07221	0.223202	4.80377	1.55705e-06	0.000107299	RP3-468K18.5	392
chr1_156066633_156067275	26.0737	1.07365	0.223754	4.79836	1.59971e-06	0.00010956	LMNA	-14265
chr4_124538100_124538657	16.6249	1.38933	0.290142	4.78844	1.68086e-06	0.000114239	RP11-93L9.1	32765
chr22_37986300_37987019	23.2022	1.32619	0.277759	4.77459	1.80073e-06	0.000121275	LGALS2	-10213
chr3_192569463_192570099	23.9483	1.10973	0.232715	4.76862	1.85488e-06	0.000124546	MB21D2	65852
chr3_100935504_100936539	26.2303	1.04762	0.22112	4.73777	2.1608e-06	0.000141459	snoU13	-14829
chr5_44048398_44049076	18.7111	1.4859	0.31406	4.73125	2.23146e-06	0.000145657	RNU6-381P	17758
chrX_152647208_152647858	12.1378	1.60275	0.339782	4.717	2.39353e-06	0.000154873	U82695.5	16383
chr11_102630862_102631837	34.0895	1.08029	0.229101	4.71536	2.4128e-06	0.000155894	AP000619.5	-6679
chr22_50414777_50415259	15.6196	1.69249	0.360332	4.69703	2.63969e-06	0.000168113	IL17REL	35830
chr8_48281733_48283021	72.6776	0.619166	0.132396	4.67663	2.91629e-06	0.000184148	SPIDR	-108211
chr6_11374092_11375183	31.7138	1.03857	0.222394	4.66997	3.01248e-06	0.000189953	NEDD9	7399
chr14_104228712_104230447	35.6049	0.879454	0.188521	4.66502	3.08589e-06	0.000193758	PPP1R13B	83481
chr14_104228712_104230447.1	35.6049	0.879454	0.188521	4.66502	3.08589e-06	0.000193758	RP11-73M18.11	0
chr9_19161541_19162109	21.8756	1.39149	0.299006	4.65374	3.25971e-06	0.000202107	PLIN2	-12253
chrX_106953764_106955146	30.089	0.902665	0.194259	4.64672	3.37252e-06	0.000207655	TSC22D3	65163
chr16_11404929_11406051	38.9548	0.851076	0.183381	4.64103	3.46682e-06	0.000211125	RMI2	-61424
chr1_17074886_17075758	21.0824	1.06712	0.230015	4.63935	3.49514e-06	0.00021198	RNU1-4	-7876
chr13_44662778_44664004	36.8012	0.936117	0.201767	4.6396	3.49092e-06	0.00021198	LINC00390	47369
chr18_13610919_13612896	48.1594	0.729713	0.157329	4.63814	3.51566e-06	0.000212934	LDLRAD4	-392134
chr18_13610919_13612896.1	48.1594	0.729713	0.157329	4.63814	3.51566e-06	0.000212934	MIR4526	0
chr8_121820832_121822959	78.6371	0.688169	0.148948	4.62021	3.83361e-06	0.000228768	SNTB1	2555
chr1_220295187_220295922	17.5694	1.51878	0.328872	4.61815	3.8718e-06	0.000230737	IARS2	-27744
chr16_19407726_19408353	17.0646	1.456	0.316094	4.60623	4.10045e-06	0.000243062	CTA-363E6.2	4663
chr11_74446294_74447095	35.0305	0.956911	0.208156	4.5971	4.28422e-06	0.000251793	CHRDL2	-3864
chr11_120302719_120303996	29.8382	1.0595	0.230683	4.59289	4.37156e-06	0.000256313	ARHGEF12	-94933
chr18_21408375_21408845	19.3098	1.33823	0.291382	4.59268	4.3758e-06	0.000256313	LAMA3	-138969
chr11_85029376_85030045	18.5963	1.35114	0.294319	4.59071	4.41736e-06	0.000258068	DLG2	308922
chr15_101739042_101740986	52.8473	0.765959	0.166966	4.58752	4.48543e-06	0.000260676	CHSY1	51152
chr2_27193068_27193998	20.9436	1.19583	0.261388	4.57495	4.76343e-06	0.000273971	AC013472.4	38678
chr2_27193068_27193998.1	20.9436	1.19583	0.261388	4.57495	4.76343e-06	0.000273971	MAPRE3	0
chr11_12257358_12258306	22.2053	1.20082	0.263221	4.56203	5.06614e-06	0.00028877	RP11-265D17.2	26415
chr20_47338530_47340797	71.2419	0.594414	0.130371	4.55941	5.12968e-06	0.000292018	PREX1	103624
chr1_219263465_219264531	27.4539	1.1021	0.242245	4.54953	5.37649e-06	0.000303738	RP11-135J2.4	82773
chr2_152903249_152904140	33.2586	1.03672	0.228351	4.54003	5.62465e-06	0.000314169	CACNB4	51398
chr12_69433552_69434103	17.6228	1.29971	0.287132	4.52652	5.99634e-06	0.000330779	CPM	-68202
chr4_57276277_57276928	14.5671	1.63332	0.361313	4.52052	6.16884e-06	0.000339874	AC068620.1	0
chr4_57276277_57276928.1	14.5671	1.63332	0.361313	4.52052	6.16884e-06	0.000339874	PPAT	24854
chr2_172780906_172781416	11.4383	1.93474	0.42853	4.51483	6.33674e-06	0.000347833	HAT1	-1935
chr2_172780906_172781416.1	11.4383	1.93474	0.42853	4.51483	6.33674e-06	0.000347833	SLC25A12	83347
chr6_140085531_140086287	27.3963	1.17245	0.260476	4.50116	6.75827e-06	0.000367348	RP5-899B16.1	89769
chr7_129141869_129142866	32.4901	0.843247	0.187472	4.49799	6.85998e-06	0.000371516	SMKR1	0
chr14_59213052_59214518	45.0863	0.8244	0.183372	4.49578	6.93145e-06	0.00037493	AL121819.1	23447
chr9_130597758_130598971	38.0305	0.747529	0.166566	4.48787	7.19371e-06	0.000385834	ENG	18065
chr1_8772620_8773389	25.6552	1.24729	0.278775	4.47416	7.67111e-06	0.000408487	RERE	104314
chr3_12234800_12236242	35.2218	0.95856	0.214237	4.4743	7.66611e-06	0.000408487	TIMP4	-33949
chr7_26006725_26008484	35.2103	0.903659	0.202002	4.47352	7.69426e-06	0.000408742	MIR148A	-17119
chr3_151920191_151923548	83.8837	0.638275	0.142885	4.46706	7.93e-06	0.000419264	RP11-246A10.1	-50678
chr11_60859195_60860168	22.4629	1.11042	0.248629	4.46616	7.96347e-06	0.000420533	CD5	9699
chr1_33899145_33899865	36.9342	0.81534	0.182577	4.46572	7.97998e-06	0.000420906	AL138837.1	7848
chr10_17569303_17570974	62.5329	0.715873	0.16033	4.46499	8.00727e-06	0.000421846	ST8SIA6	-72974
chr6_37070172_37070948	29.7286	0.879949	0.19722	4.46177	8.12841e-06	0.000427217	COX6A1P2	-57566
chr14_52774577_52775341	16.1458	1.42644	0.320314	4.45324	8.45824e-06	0.000442462	PTGER2	5682
chr8_41108266_41109083	41.3062	0.819161	0.184135	4.44871	8.63885e-06	0.000450851	MIR548AO	19580
chr3_46136408_46137415	27.9751	0.958147	0.215539	4.44535	8.77504e-06	0.000457422	XCR1	-67174
chr9_16417007_16418212	30.3803	1.04137	0.234276	4.44509	8.7857e-06	0.000457442	BNC2	452518
chr19_45975729_45979017	66.6809	0.760153	0.17129	4.43782	9.08766e-06	0.00047151	FOSB	-4477
chr4_38162058_38163191	30.9948	1.07475	0.242455	4.43277	9.30285e-06	0.000480993	AC098680.1	77043
chr14_104397654_104398280	22.2181	1.28527	0.290415	4.42564	9.61573e-06	0.000494299	TDRD9	-2856
chr1_90134740_90136175	47.2086	0.810527	0.183232	4.42349	9.7117e-06	0.000498657	LRRC8C	-36110
chr1_90134740_90136175.1	47.2086	0.810527	0.183232	4.42349	9.7117e-06	0.000498657	RP11-302M6.4	-36042
chr1_90134740_90136175.2	47.2086	0.810527	0.183232	4.42349	9.7117e-06	0.000498657	RP11-413E1.4	-39457
chr14_91833239_91834306	31.5526	1.01268	0.229292	4.41656	1.00282e-05	0.000513351	AL133153.1	-33183
chr3_32818538_32818959	11.7049	1.70586	0.386247	4.4165	1.00311e-05	0.000513351	CNOT10-AS1	-39592
chr17_54996182_54996966	37.0932	0.951051	0.215408	4.41511	1.00959e-05	0.000515413	TRIM25	-4783
chr8_56842538_56843549	48.3194	0.789404	0.179184	4.40555	1.05516e-05	0.000536217	LYN	-50167
chr1_85527565_85528321	22.3302	1.34671	0.305725	4.40498	1.05795e-05	0.000537021	WDR63	-62736
chr19_30178105_30179684	57.1211	0.710282	0.161386	4.40115	1.0768e-05	0.000544724	PLEKHF1	-22143
chr17_9966193_9967686	50.8217	0.69113	0.157141	4.39816	1.09172e-05	0.000549153	GAS7	134183
chr7_3710399_3711047	17.3375	1.35639	0.309067	4.38867	1.14044e-05	0.000571722	SDK1	-369181
chr20_10837828_10838675	31.4863	0.968078	0.220635	4.38769	1.14559e-05	0.000573657	RP11-103J8.1	-184253
chr2_47261176_47262840	38.258	0.813264	0.185391	4.38674	1.1506e-05	0.000575522	AC093732.1	4824
chr2_47261176_47262840.1	38.258	0.813264	0.185391	4.38674	1.1506e-05	0.000575522	TTC7A	-117881
chr2_208363601_208364186	20.1367	1.23132	0.280968	4.38244	1.1736e-05	0.000585706	CREB1	97886
chr17_18611234_18612014	23.7785	1.15252	0.263338	4.37657	1.2056e-05	0.000598991	TRIM16L	-9924
chr22_44464066_44465245	32.2497	0.870307	0.198961	4.37425	1.21849e-05	0.000603469	PARVB	0
chr6_168256294_168257019	29.6698	1.10332	0.252215	4.37452	1.21701e-05	0.000603469	MLLT4	-28654
chr19_8747381_8748214	44.8846	0.736548	0.168686	4.36638	1.26325e-05	0.000620021	CTD-2586B10.1	-7261
chr11_66103106_66104660	53.032	0.688949	0.157807	4.36577	1.26673e-05	0.000621049	RIN1	0
chr11_66103106_66104660.1	53.032	0.688949	0.157807	4.36577	1.26673e-05	0.000621049	RP11-867G23.12	-1142
chr20_36618284_36619899	47.1843	0.743675	0.170736	4.35569	1.32649e-05	0.000648205	TTI1	41972
chr1_159869616_159870443	18.066	1.2769	0.293265	4.3541	1.33617e-05	0.000650841	CCDC19	0
chr1_159869616_159870443.1	18.066	1.2769	0.293265	4.3541	1.33617e-05	0.000650841	hsa-mir-4259	0
chr11_8618764_8619145	10.5328	1.78635	0.410904	4.34737	1.37782e-05	0.000667423	STK33	-2989
chr13_110790194_110791231	52.1562	0.712938	0.164047	4.34594	1.38678e-05	0.000669578	RN7SL783P	-39696
chr12_8210173_8211556	48.7122	1.01086	0.232646	4.34507	1.39231e-05	0.000670793	C3AR1	7512
chr8_116112654_116113533	24.4826	1.00565	0.232538	4.32466	1.52766e-05	0.000728126	AF178030.2	408296
chr7_37447802_37449476	41.8323	0.790019	0.182754	4.32286	1.5402e-05	0.000732533	SNORA51	9755
chr19_51865892_51866626	28.2507	0.903521	0.209033	4.32239	1.54347e-05	0.000733303	CTD-2616J11.10	2173
chr19_51865892_51866626.1	28.2507	0.903521	0.209033	4.32239	1.54347e-05	0.000733303	CTD-2616J11.11	4728
chr19_51865892_51866626.2	28.2507	0.903521	0.209033	4.32239	1.54347e-05	0.000733303	ETFB	3047
chr17_32549765_32550155	10.7808	1.76264	0.407857	4.32171	1.54822e-05	0.000734778	CCL2	32149
chr16_57835981_57837111	28.4822	0.918252	0.212515	4.32087	1.55414e-05	0.0007368	CTD-2600O9.1	-3805
chr11_60156378_60158397	54.9232	0.648075	0.15017	4.31562	1.59154e-05	0.000750535	MS4A14	-10376
chr11_60156378_60158397.1	54.9232	0.648075	0.15017	4.31562	1.59154e-05	0.000750535	MS4A7	-10367
chr4_80979711_80980746	35.0118	0.856589	0.198543	4.31438	1.60053e-05	0.000753976	ANTXR2	13881
chr10_12375064_12376517	50.084	0.767739	0.178109	4.3105	1.62884e-05	0.000766501	RN7SL198P	-4676
chr1_220310415_220311119	20.2479	1.15519	0.268463	4.30297	1.68527e-05	0.000790549	IARS2	-42972
chr1_220310415_220311119.1	20.2479	1.15519	0.268463	4.30297	1.68527e-05	0.000790549	snoU13	0
chr13_32908694_32909386	16.4915	1.29201	0.300287	4.30258	1.6882e-05	0.000791089	BRCA2	-19084
chr7_98399631_98400525	33.1639	0.885721	0.205937	4.30092	1.70088e-05	0.000796194	RNU6-393P	-7184
chr11_66386273_66387063	26.8922	0.888211	0.206626	4.29864	1.71851e-05	0.000803601	RBM14	-2177
chr11_66386273_66387063.1	26.8922	0.888211	0.206626	4.29864	1.71851e-05	0.000803601	RBM14-RBM4	-2177
chr17_34206702_34207821	30.2403	0.925859	0.215428	4.29777	1.72525e-05	0.000805906	AC015849.2	-10732
chr17_34206702_34207821.1	30.2403	0.925859	0.215428	4.29777	1.72525e-05	0.000805906	CCL5	0
chr14_77872569_77874136	43.954	0.858383	0.199803	4.29615	1.73792e-05	0.000810973	NOXRED1	15264
chr10_135047998_135050392	52.5125	0.596974	0.13906	4.29291	1.76346e-05	0.000818603	VENTX	516
chr10_43931931_43932956	39.3741	0.760117	0.177566	4.28076	1.86258e-05	0.000856574	ZNF487	0
chrX_109073878_109074581	17.1901	1.49592	0.349616	4.27876	1.87939e-05	0.000863413	ACSL4	-97246
chr10_64574804_64578004	60.2058	0.641909	0.150061	4.27766	1.8887e-05	0.000865902	EGR2	101657
chr8_102824438_102825027	18.3444	1.20191	0.281571	4.26859	1.9671e-05	0.000890955	NCALD	-21233
chr15_93790862_93791461	17.396	1.23665	0.289761	4.26783	1.97388e-05	0.000892456	RP11-326A13.1	8966
chr11_47941783_47942470	16.8712	1.29839	0.304442	4.2648	2.00082e-05	0.000901521	PTPRJ	59643
chr3_167751870_167752813	25.0245	1.0859	0.254968	4.25897	2.05375e-05	0.000918863	GOLIM4	60320
chr2_178106946_178107771	16.3619	1.30545	0.306798	4.25507	2.0898e-05	0.000933114	NFE2L2	20530
chr1_20706790_20707987	42.9487	0.750916	0.176624	4.25149	2.12352e-05	0.000941563	RP4-749H3.1	47289
chr7_30198802_30199756	41.5871	0.736009	0.173154	4.2506	2.13195e-05	0.000943419	AC007036.5	-1656
chr18_53547904_53548516	14.0163	1.40486	0.330598	4.24946	2.14286e-05	0.000947304	CTD-2008L17.1	11753
chr17_32812898_32813473	20.8689	1.08472	0.255325	4.24839	2.15313e-05	0.000950591	AC011193.1	-6546
chr1_4372013_4372578	28.5692	1.05393	0.248152	4.24712	2.16539e-05	0.000953477	RP5-1166F10.1	99533
chr19_14153215_14154121	38.7056	0.787738	0.185695	4.2421	2.21439e-05	0.000972172	IL27RA	-10656
chr1_2143748_2144645	28.2457	0.919668	0.216934	4.23938	2.24135e-05	0.000981104	AL590822.1	976
chr1_2143748_2144645.1	28.2457	0.919668	0.216934	4.23938	2.24135e-05	0.000981104	C1orf86	0
chr1_2143748_2144645.2	28.2457	0.919668	0.216934	4.23938	2.24135e-05	0.000981104	RP11-181G12.4	0
chr1_2143748_2144645.3	28.2457	0.919668	0.216934	4.23938	2.24135e-05	0.000981104	RP11-181G12.5	0
chr5_43193542_43194422	25.7657	0.99676	0.235187	4.23817	2.2535e-05	0.000983521	NIM1	-1370
chr22_32614355_32615475	40.4617	0.745739	0.175987	4.23747	2.26053e-05	0.000985624	RP1-90G24.10	-13254
chr22_32614355_32615475.1	40.4617	0.745739	0.175987	4.23747	2.26053e-05	0.000985624	SLC5A4	35854
chr1_17962096_17962875	32.4072	0.894696	0.21123	4.23565	2.27891e-05	0.000990725	ARHGEF10L	-95767
chr2_152899262_152899785	14.533	1.39823	0.330179	4.23475	2.28802e-05	0.000992885	CACNB4	55753
chr4_110734373_110734826	11.2824	1.65164	0.390066	4.23424	2.29322e-05	0.000994032	RP11-602N24.3	1741
chr9_117267462_117268269	22.1921	1.10948	0.262079	4.23337	2.30213e-05	0.000996924	DFNB31	0
chr14_73646473_73647488	26.1859	0.99715	0.236055	4.22423	2.39761e-05	0.00103525	PSEN1	-11937
chrX_70760656_70761853	19.7368	1.26914	0.300574	4.2224	2.4172e-05	0.0010427	OGT	-7724
chr1_89894480_89895108	22.6869	0.956863	0.226809	4.21881	2.456e-05	0.00105738	GBP1P1	-21243
chr4_79670667_79671574	25.0983	1.05488	0.250139	4.21716	2.47399e-05	0.0010641	RP11-109G23.3	25554
chr2_143481088_143482970	33.5473	0.892189	0.211809	4.21224	2.52856e-05	0.00108547	KYNU	152265
chr19_8487769_8489272	52.2619	0.700978	0.166507	4.20991	2.55471e-05	0.00109433	2020-03-02	-9616
chr19_8487769_8489272.1	52.2619	0.700978	0.166507	4.20991	2.55471e-05	0.00109433	RP11-886P16.6	3440
chr5_142308980_142309594	15.8286	1.28411	0.305039	4.20968	2.55737e-05	0.00109433	ARHGAP26	-159032
chr6_132786706_132787647	24.2532	1.00629	0.239134	4.20807	2.57561e-05	0.00109826	STX7	46691
chr1_154723813_154724829	25.9271	0.981215	0.233336	4.20517	2.60892e-05	0.00111034	KCNN3	117928
chr2_160417890_160419311	31.289	0.88229	0.20991	4.20319	2.63184e-05	0.00111795	BAZ2B	53893
chr17_76754877_76756061	29.5047	0.913903	0.217629	4.19936	2.67666e-05	0.00113159	CYTH1	-41770
chr16_83847405_83848216	23.3521	1.11591	0.26579	4.19846	2.68741e-05	0.00113399	HSBP1	-5958
chr8_101270658_101271487	36.2236	0.837772	0.199561	4.19807	2.69203e-05	0.00113486	RNF19A	51069
chr12_52430511_52431716	24.1112	1.02969	0.245402	4.19592	2.71764e-05	0.00114092	NR4A1	13475
chr8_56797806_56799174	69.8463	0.596626	0.142211	4.19536	2.72435e-05	0.00114199	LYN	-5435
chr18_53655762_53656368	21.0397	1.12393	0.268258	4.18974	2.79269e-05	0.00116516	CTD-2008L17.1	-95494
chr2_12596388_12597039	29.9144	0.96204	0.229643	4.18928	2.79842e-05	0.00116645	AC096559.1	-449135
chr15_52305301_52305878	21.281	1.24581	0.29767	4.1852	2.84921e-05	0.00118213	CTD-2650P22.1	5415
chr16_66960887_66962693	41.3215	0.768064	0.184004	4.17418	2.99062e-05	0.0012293	RRAD	-1340
chr15_95845382_95845947	22.6313	0.906581	0.217789	4.16266	3.14562e-05	0.00128166	CTD-2536I1.1	24383
chr15_101747780_101748774	32.8201	0.794996	0.190974	4.16285	3.14294e-05	0.00128166	CHSY1	43364
chr18_32556799_32559565	54.0798	0.678869	0.163089	4.16257	3.14679e-05	0.00128166	MAPRE2	0
chr15_90943761_90944572	29.9242	0.905625	0.217842	4.15725	3.22095e-05	0.00130828	IQGAP1	-12312
chr8_90817267_90817834	20.9342	1.14461	0.275481	4.15496	3.25341e-05	0.00131905	RIPK2	-47293
chr7_47330834_47331730	39.062	0.788495	0.189856	4.15313	3.2796e-05	0.00132846	TNS3	290013
chr8_25056229_25057094	42.1379	0.917561	0.220961	4.1526	3.28713e-05	0.0013303	DOCK5	-13992
chr6_159463232_159464278	27.9149	0.875909	0.210961	4.15199	3.29602e-05	0.00133269	RP1-111C20.4	-54023
chr6_159463232_159464278.1	27.9149	0.875909	0.210961	4.15199	3.29602e-05	0.00133269	TAGAP	1907
chr18_21415024_21415910	28.0051	0.931626	0.224459	4.15054	3.31686e-05	0.00133747	LAMA3	-145618
chr7_150062927_150063749	23.4298	0.961243	0.231916	4.14479	3.40123e-05	0.00136162	RP4-584D14.5	5931
chr10_10704610_10705228	17.0738	1.20166	0.290409	4.1378	3.5065e-05	0.0013925	SFTA1P	131650
chr10_4812758_4813482	21.8283	1.15813	0.280041	4.13557	3.54069e-05	0.00140232	AKR1E2	54964
chr16_72965252_72966186	34.3809	0.747268	0.180688	4.13569	3.53889e-05	0.00140232	ZFHX3	127412
chr6_134609466_134610468	32.4396	0.923632	0.223495	4.13267	3.58572e-05	0.00141637	SGK1	28729
chr16_72206005_72206837	37.5173	0.791217	0.191732	4.12668	3.68034e-05	0.00144989	PMFBP1	-47253
chr5_32390808_32392333	44.6567	0.779276	0.188943	4.12441	3.71692e-05	0.00146163	ZFR	52535
chr6_111265750_111266334	18.386	1.15228	0.279413	4.12394	3.7245e-05	0.00146211	GTF3C6	13429
chr19_7837371_7838201	51.399	0.73989	0.179468	4.12269	3.74468e-05	0.00146874	CLEC4M	-9337
chr13_46928792_46929394	24.9729	0.929218	0.225619	4.11852	3.81314e-05	0.00149165	KIAA0226L	82932
chr14_89815531_89816074	13.689	1.29262	0.313976	4.11694	3.83941e-05	0.00149929	FOXN3	269420
chr6_144477472_144477892	17.4567	1.21265	0.294591	4.11639	3.84849e-05	0.0015002	STX11	-5810
chr6_170683812_170684615	21.4616	1.18	0.287106	4.10997	3.95715e-05	0.00153852	FAM120B	-67969
chr3_167238306_167239545	28.76	0.924166	0.224932	4.10865	3.97974e-05	0.0015446	WDR49	132227
chr14_20239986_20241033	48.9649	0.670796	0.163283	4.10817	3.98808e-05	0.00154649	OR4M1	7368
chr20_22393918_22395660	38.229	0.771553	0.187945	4.1052	4.03962e-05	0.00156104	RP5-1004I9.1	5622
chr2_216658370_216659209	25.0129	1.03889	0.253238	4.10244	4.08823e-05	0.001573	LINC00607	49051
chrX_15769408_15770110	10.3699	1.70032	0.414567	4.10144	4.10583e-05	0.00157704	CA5B	-13016
chr22_24536302_24537027	17.7417	1.14603	0.279885	4.09465	4.22809e-05	0.00161425	CABIN1	-128505
chr15_34339531_34340345	51.5614	0.7315	0.178772	4.09179	4.28047e-05	0.00162952	CHRM5	-78443
chr19_13901039_13901679	32.6305	0.78543	0.191958	4.09167	4.28271e-05	0.00162952	AC008686.1	-67
chr1_159880029_159880970	38.485	0.669697	0.163687	4.09133	4.2891e-05	0.00163055	AL590560.1	0
chr10_3093908_3094526	13.6977	1.32576	0.324112	4.09044	4.3055e-05	0.00163539	RP11-118K6.3	13668
chr9_99182610_99183614	23.6288	1.07515	0.262929	4.08912	4.33007e-05	0.00164192	ZNF367	-1999
chr9_113564714_113565231	19.7412	1.1641	0.28476	4.088	4.35116e-05	0.00164851	RNU6-432P	100386
chr3_12395247_12396575	38.0561	0.888544	0.217834	4.079	4.52306e-05	0.00169918	PPARG	-41361
chr10_14689569_14690803	45.8043	0.701373	0.172074	4.07601	4.58151e-05	0.00171679	FAM107B	126094
chr3_16890634_16891777	27.3875	1.00187	0.24629	4.06785	4.74494e-05	0.00177207	PLCL2	-46476
chr15_58438831_58439938	41.1152	0.810921	0.19939	4.06701	4.762e-05	0.00177695	ALDH1A2	131583
chr15_58438831_58439938.1	41.1152	0.810921	0.19939	4.06701	4.762e-05	0.00177695	AQP9	-8464
chr4_40602774_40604123	46.4575	0.806285	0.198288	4.06624	4.77787e-05	0.00178138	RBM47	28518
chr1_186807476_186809208	43.4771	0.806403	0.198347	4.06561	4.79061e-05	0.00178314	PLA2G4A	-9392
chr3_71440662_71442658	38.7657	0.843003	0.20785	4.05582	4.99577e-05	0.00185331	FOXP1	190247
chr11_10920627_10922373	42.9957	0.753176	0.185906	4.05138	5.09159e-05	0.00188414	CTD-2003C8.2	0
chr11_10920627_10922373.1	42.9957	0.753176	0.185906	4.05138	5.09159e-05	0.00188414	ZBED5-AS1	-40822
chr1_212659050_212659958	32.2852	0.806899	0.199316	4.04834	5.15821e-05	0.00190089	RP11-61J19.2	-17965
chr5_7755654_7757290	41.3316	0.739719	0.182765	4.04738	5.17944e-05	0.00190714	ADCY2	-359334
chr2_7935764_7936556	21.5475	1.06689	0.263703	4.04578	5.21485e-05	0.00191859	AC092580.4	-69833
chr6_24228856_24229401	23.5782	1.00554	0.248578	4.04518	5.22826e-05	0.00192194	DCDC2	128880
chr16_15766490_15767354	33.2299	0.807216	0.199669	4.04277	5.28226e-05	0.00193859	NDE1	-29367
chr3_23789994_23790690	22.5961	1.2225	0.302726	4.03829	5.38417e-05	0.00196626	AC020626.1	18412
chr11_9587227_9588217	26.6991	1.04402	0.258917	4.03225	5.52458e-05	0.00201373	WEE1	7011
chr6_140262077_140262722	19.844	1.20054	0.297745	4.03211	5.52773e-05	0.00201373	RP5-899B16.2	-63549
chr6_16342401_16343059	27.3476	0.975727	0.242026	4.0315	5.54217e-05	0.00201734	ATXN1	418649
chr7_55600906_55602605	84.9483	0.637632	0.158514	4.02255	5.75715e-05	0.00208876	VOPP1	-17136
chr1_112275740_112277011	34.326	0.735015	0.183002	4.01644	5.90851e-05	0.00212635	FAM212B	5036
chr2_37307121_37308186	25.7093	0.993641	0.247519	4.0144	5.95965e-05	0.00214129	HEATR5B	3300
chr7_4784199_4786367	46.9973	0.719872	0.179458	4.01136	6.03706e-05	0.00216235	FOXK1	-62260
chr5_55156058_55156869	20.292	0.988235	0.24645	4.00988	6.07501e-05	0.00216891	IL31RA	-8852
chr11_84834866_84835379	14.8615	1.22298	0.305394	4.0046	6.21223e-05	0.00221594	DLG2	503588
chr3_53017367_53018248	34.2461	0.809314	0.202237	4.00182	6.2857e-05	0.00223678	SFMBT1	61837
chr4_48196960_48199221	46.3669	0.710714	0.178052	3.99161	6.56253e-05	0.0023131	TEC	72661
chr20_51291901_51292400	16.0031	1.22392	0.306986	3.98688	6.69473e-05	0.00235039	RP4-715N11.2	5567
chr10_65279649_65282335	49.6326	0.595706	0.149493	3.98484	6.75265e-05	0.00236327	REEP3	0
chr4_26994078_26994852	18.6007	1.16905	0.293772	3.97944	6.90777e-05	0.00240998	STIM2	-131663
chr12_128293695_128295315	40.7955	0.790245	0.1987	3.97709	6.97649e-05	0.00242446	RP11-749H20.1	10414
chr2_172778190_172780051	51.1229	0.666744	0.16764	3.97725	6.97182e-05	0.00242446	HAT1	0
chr2_172778190_172780051.1	51.1229	0.666744	0.16764	3.97725	6.97182e-05	0.00242446	SLC25A12	84712
chr4_80992692_80994988	49.5461	0.635251	0.159728	3.97709	6.97652e-05	0.00242446	ANTXR2	0
chr1_82932462_82933166	16.9009	1.10564	0.278464	3.97049	7.17263e-05	0.00247714	RP11-147G16.1	-205645
chr2_216588624_216589262	14.0677	1.4197	0.357695	3.96901	7.21708e-05	0.00249057	LINC00607	118998
chr6_161967678_161969058	31.0774	0.843156	0.212459	3.96857	7.23055e-05	0.00249328	PARK2	1179746
chr3_138086649_138087117	12.3154	1.41432	0.356598	3.96615	7.3044e-05	0.00251263	MRAS	-18662
chr8_121082023_121082619	27.366	0.759788	0.191602	3.96546	7.32559e-05	0.00251437	RP11-760H22.2	-15105
chr10_20113241_20116272	59.0761	0.634913	0.160336	3.95989	7.49846e-05	0.00256185	PLXDC2	-8074
chr14_93052168_93053130	34.0569	0.88015	0.222464	3.95637	7.60986e-05	0.00258207	RIN3	-72051
chr1_173992554_173993180	20.3449	1.06326	0.268777	3.95592	7.62416e-05	0.0025831	RP11-160H22.3	-908
chr14_69267051_69267610	14.591	1.45548	0.368126	3.95375	7.69363e-05	0.00259664	ZFP36L1	-9091
chr14_73643340_73644010	19.2996	1.05382	0.266707	3.95124	7.77468e-05	0.00261607	PSEN1	-8804
chr7_133373578_133374588	26.9052	0.97244	0.24611	3.95124	7.77462e-05	0.00261607	EXOC4	-435750
chr17_64187875_64188735	28.164	0.886567	0.22446	3.94979	7.82208e-05	0.00263003	CEP112	0
chr20_5654757_5656658	45.7443	0.702077	0.177763	3.9495	7.83133e-05	0.00263115	GPCPD1	-63085
chr9_120480234_120481340	35.4833	0.846119	0.21427	3.94885	7.85269e-05	0.00263634	RNU6-1082P	-9854
chr16_55572711_55573595	24.4748	1.01986	0.258616	3.94354	8.02863e-05	0.00268326	LPCAT2	-29802
chr16_55572711_55573595.1	24.4748	1.01986	0.258616	3.94354	8.02863e-05	0.00268326	RP11-212I21.4	-600
chr11_35325211_35326413	27.2113	0.868754	0.22045	3.94083	8.12008e-05	0.00270971	SLC1A2	115198
chr11_93863798_93864440	21.7615	1.09728	0.278452	3.94065	8.12601e-05	0.00270971	PANX1	-1705
chr1_205144530_205145179	23.4402	1.10593	0.281226	3.93252	8.40615e-05	0.00278228	DSTYK	35516
chr9_136008995_136009499	14.0255	1.19595	0.304174	3.9318	8.43122e-05	0.00278643	RALGDS	15223
chr15_51386255_51387378	16.1577	1.14967	0.292551	3.92982	8.5009e-05	0.00280342	RP11-108K3.1	-56571
chr15_51386255_51387378.1	16.1577	1.14967	0.292551	3.92982	8.5009e-05	0.00280342	TNFAIP8L3	10096
chr10_3893178_3895098	41.6461	0.762694	0.194153	3.92832	8.55411e-05	0.00281451	RP11-464C19.2	-17037
chr1_212731544_212732669	38.5034	0.739417	0.188319	3.9264	8.62266e-05	0.00283288	RP11-61J19.4	-370
chr14_102256418_102257017	17.1921	1.10074	0.280627	3.92241	8.76661e-05	0.00287381	PPP2R5C	-28212
chr8_26524298_26525576	37.7188	0.761005	0.194306	3.91652	8.98369e-05	0.00292987	DPYSL2	-152508
chr11_15837372_15838152	19.5335	1.1476	0.293164	3.91455	9.05739e-05	0.00293883	RP11-396O20.2	-56928
chr14_93051115_93051660	20.0509	0.981364	0.250929	3.91092	9.19445e-05	0.00298113	RIN3	-70998
chr17_66507834_66509384	42.548	0.630338	0.161237	3.90939	9.25294e-05	0.00299573	PRKAR1A	2157
chr5_134149122_134149952	21.5098	1.12167	0.286911	3.90948	9.24941e-05	0.00299573	DDX46	-54652
chr5_35483049_35484435	32.6683	0.87375	0.223579	3.90801	9.30575e-05	0.00301064	U3	-53884
chr6_16712715_16713763	28.5368	0.891486	0.228135	3.90771	9.31759e-05	0.00301228	ATXN1	47945
chr5_93768249_93769644	31.8435	0.877283	0.224525	3.90729	9.33365e-05	0.00301529	KIAA0825	184659
chr10_64391882_64392875	34.0187	0.751904	0.19254	3.90517	9.41576e-05	0.0030374	ZNF365	-257932
chr18_74187690_74190072	56.9269	0.655241	0.167781	3.90534	9.40927e-05	0.0030374	ZNF516	17075
chr22_24541743_24542572	21.6758	0.963255	0.246817	3.90271	9.51224e-05	0.00306408	CABIN1	-133946
chr14_52780171_52782560	47.7695	0.604241	0.154937	3.89991	9.62288e-05	0.00309301	PTGER2	0
chr3_120277473_120278832	34.1604	0.774107	0.198547	3.89887	9.66432e-05	0.00309856	NDUFB4	36324
chr11_101785601_101787228	30.9186	0.739591	0.189837	3.89592	9.78255e-05	0.00312403	ANGPTL5	26
chr11_101785601_101787228.1	30.9186	0.739591	0.189837	3.89592	9.78255e-05	0.00312403	KIAA1377	0
chr7_129132896_129134221	27.9139	0.866097	0.222337	3.89542	9.80292e-05	0.00312605	SMKR1	8099
chr10_80843655_80844768	35.702	0.719336	0.184708	3.89445	9.84211e-05	0.0031363	ZMIZ1	-14864
chr8_57594529_57595478	44.8217	0.679232	0.174478	3.89294	9.90379e-05	0.00314695	RP11-17A4.4	-25505
chr12_43025217_43025798	21.7547	0.941493	0.241874	3.8925	9.92183e-05	0.00314918	RP11-609L23.1	14503
chr6_169514804_169516173	28.2088	0.946904	0.243288	3.89212	9.93739e-05	0.00315087	RP11-417E7.1	46847
chr8_49211089_49212362	34.4178	0.787182	0.202281	3.89153	9.96139e-05	0.00315624	RNU6-295P	8229
chr5_137805487_137806259	11.877	1.41639	0.364024	3.89093	9.98623e-05	0.00316108	EGR1	-4309
chr8_132828009_132829455	57.8297	0.618959	0.159098	3.89044	0.000100064	0.00316374	EFR3A	86880
chr16_87497656_87499547	58.3908	0.62246	0.160148	3.88678	0.000101582	0.0032066	ZCCHC14	26105
chr12_27391025_27392059	39.441	0.755874	0.194754	3.88117	0.000103954	0.00326584	STK38L	5049
chr10_17242299_17244044	49.508	0.588857	0.151821	3.87863	0.000105048	0.00329095	TRDMT1	0
chr2_98628976_98630404	43.0595	0.707442	0.182538	3.87559	0.000106365	0.00332752	TMEM131	-16622
chr6_100650407_100651785	29.5636	0.848214	0.218885	3.87517	0.000106551	0.00333099	MCHR2	-208284
chr11_61792664_61793623	52.1553	0.615645	0.158941	3.87341	0.000107321	0.00335037	RP11-810P12.5	56034
chr3_190338676_190340282	29.53	0.937858	0.242217	3.87198	0.000107956	0.00336545	RN7SKP296	19670
chr22_35697220_35698008	34.1976	0.78777	0.20363	3.86864	0.000109443	0.00340704	TOM1	-1424
chr14_94016669_94017252	12.8799	1.33518	0.345262	3.86715	0.000110112	0.00342549	UNC79	-217105
chr10_97026387_97026900	15.4084	1.36133	0.352246	3.86471	0.00011122	0.00345752	PDLIM1	23882
chr11_35104014_35105745	58.3108	0.592241	0.153273	3.86397	0.00011156	0.00345842	AL356215.1	44471
chr13_28822210_28823084	26.911	0.896081	0.231897	3.86413	0.000111488	0.00345842	PAN3	-109568
chr12_90149856_90151106	59.3167	0.589625	0.152695	3.86146	0.000112712	0.00348687	RNU6-148P	-2021
chr6_167493250_167493914	23.2867	0.981013	0.254042	3.86162	0.000112636	0.00348687	RP11-517H2.6	-80358
chr20_18620248_18620706	15.4745	1.15792	0.300042	3.85919	0.000113764	0.00351453	DTD1	-51712
chr2_150008793_150009702	31.2451	0.863148	0.223704	3.85845	0.00011411	0.00352033	LYPD6B	-34084
chr11_9590320_9590892	17.7638	1.06865	0.277013	3.85775	0.000114436	0.00352793	WEE1	4336
chr7_85100623_85101601	29.6906	0.830397	0.215265	3.85756	0.000114525	0.00352826	LINC00972	-50186
chr14_62060992_62061901	24.1712	0.928693	0.240816	3.85645	0.000115047	0.00354187	RP11-47I22.3	-23679
chr14_62060992_62061901.1	24.1712	0.928693	0.240816	3.85645	0.000115047	0.00354187	RP11-47I22.4	-65147
chr17_65477297_65479247	50.9746	0.670873	0.174069	3.85406	0.000116175	0.00356921	PITPNC1	-103723
chr16_15583179_15583860	18.079	1.19683	0.310638	3.85281	0.000116768	0.00358247	C16orf45	-54848
chr16_15583179_15583860.1	18.079	1.19683	0.310638	3.85281	0.000116768	0.00358247	RP11-1021N1.1	-93373
chr6_89632702_89633479	26.0779	0.833441	0.216347	3.85234	0.000116995	0.00358697	RNGTT	39837
chr1_110333219_110333984	26.5864	0.844137	0.219168	3.85155	0.000117372	0.00359356	EPS8L3	-26570
chr18_57717373_57717815	14.3266	1.07811	0.279985	3.85059	0.000117832	0.00360516	RNU6-567P	-31517
chr10_13675700_13676626	25.3252	0.85397	0.22198	3.84706	0.000119546	0.00364757	RP11-295P9.3	-3417
chr4_164736941_164737347	10.9362	1.37289	0.357607	3.8391	0.000123486	0.00374982	2020-03-01	567856
chr4_124519505_124521542	42.9528	0.683558	0.178065	3.83881	0.000123634	0.00375175	RP11-93L9.1	49880
chr2_120113148_120114016	23.7814	0.946149	0.246494	3.83843	0.000123821	0.00375314	C2orf76	10389
chr6_136931222_136931911	22.218	1.05711	0.275521	3.83676	0.00012467	0.00377491	MAP3K5	181746
chr3_130568666_130569731	32.4702	0.843671	0.220249	3.83052	0.000127871	0.00384883	ATP2C1	0
chr20_51021885_51023197	29.5559	0.953068	0.248852	3.82985	0.00012822	0.00385672	RP4-583K8.1	48962
chrX_38728315_38729129	12.4563	1.36813	0.357848	3.82323	0.000131717	0.00394593	MID1IP1-AS1	-65179
chr9_123346225_123346812	25.9307	0.986508	0.258055	3.82286	0.000131914	0.00394918	CDK5RAP2	-3789
chr8_48513101_48513890	43.4937	0.698184	0.182815	3.81908	0.00013395	0.00399668	SPIDR	-339579
chr5_145458966_145459959	25.5184	1.04217	0.273024	3.81713	0.000135012	0.00402029	SH3RF2	-142825
chrX_11359370_11360500	21.9143	1.00137	0.262997	3.80753	0.00014036	0.00414077	ARHGAP6	323322
chr5_81469829_81470678	27.9611	0.833749	0.219008	3.80694	0.000140695	0.00414789	RN7SL378P	-95584
chr5_9187892_9188628	16.957	1.03005	0.270617	3.80629	0.000141069	0.00415419	SEMA5A	357560
chr11_111807330_111808166	25.1774	0.985121	0.258844	3.80584	0.000141321	0.00415809	DIXDC1	-9463
chr4_107208482_107209009	13.5982	1.23277	0.323932	3.80564	0.000141439	0.0041588	TBCK	33644
chr2_40268964_40269700	26.6153	0.973638	0.255882	3.80503	0.000141785	0.00416087	SLC8A1-AS1	-255372
chr1_168473016_168473986	41.1196	0.671001	0.176475	3.80224	0.000143393	0.00419378	RP5-968D22.3	-8134
chr20_62446694_62447634	12.0328	1.32969	0.349798	3.80131	0.000143935	0.00420167	RP4-583P15.11	-7266
chr20_62446694_62447634.1	12.0328	1.32969	0.349798	3.80131	0.000143935	0.00420167	ZBTB46	14934
chr11_61771723_61773400	48.4593	0.625558	0.164602	3.80044	0.000144441	0.00421093	AP003733.1	-36271
chr6_41254176_41255044	32.1143	0.708689	0.186762	3.79462	0.000147872	0.00428848	TREM1	0
chrX_132678119_132678638	14.62	1.01739	0.268092	3.79493	0.000147683	0.00428848	GPC3	441285
chr14_89769040_89771630	50.1052	0.682938	0.180208	3.78973	0.000150811	0.00435104	FOXN3	313864
chr3_42814165_42815136	38.2931	0.686245	0.181103	3.78925	0.000151102	0.00435661	CCDC13	0
chr3_42814165_42815136.1	38.2931	0.686245	0.181103	3.78925	0.000151102	0.00435661	RP11-70C1.1	-2062
chr6_159270837_159271850	23.2815	0.996832	0.263224	3.78701	0.000152471	0.00438471	OSTCP1	6815
chr11_45879412_45879989	21.7548	0.94	0.248244	3.7866	0.00015272	0.00438904	CRY2	-10744
chr2_238064574_238065513	32.704	0.778109	0.205937	3.77838	0.000157851	0.00452191	AC107079.1	-31834
chr11_9181667_9182069	10.7094	1.50437	0.398282	3.77715	0.000158633	0.00453846	DENND5A	104566
chr1_19831537_19832736	30.1795	0.794318	0.210317	3.77677	0.000158875	0.00454249	RNU4-28P	4351
chr10_133571447_133571982	20.7038	1.03904	0.27526	3.77477	0.000160156	0.00457323	AL450307.1	50554
chr12_49594907_49595963	22.7516	0.981682	0.260118	3.77399	0.000160658	0.00458168	TUBA1C	6366
chr4_26289636_26290724	44.1883	0.710648	0.188533	3.76936	0.00016367	0.00465761	RBPJ	73334
chr12_120026111_120027531	36.0038	0.73123	0.19402	3.76885	0.000164004	0.00465937	RP11-768F21.1	4776
chr2_17042489_17044054	30.8037	0.866684	0.229992	3.76832	0.000164347	0.004663	AC080094.1	107247
chr14_88541837_88542281	13.353	1.29898	0.344891	3.76634	0.000165656	0.00468519	RP11-300J18.3	-50944
chr12_6404217_6404731	11.9732	1.35485	0.360065	3.7628	0.00016802	0.00473745	PLEKHG6	14871
chr3_156398634_156399257	20.6873	0.921547	0.245013	3.76122	0.000169085	0.00475645	TIPARP	-7611
chr14_42684163_42684916	19.4031	0.981273	0.261101	3.75822	0.000171128	0.00479428	RP11-313C4.1	52874
chr10_64468236_64470339	46.3379	0.64915	0.172793	3.75681	0.000172096	0.00480928	AC067751.1	-50292
chr2_216592912_216593784	30.4712	0.875908	0.233138	3.75704	0.000171937	0.00480928	LINC00607	114476
chr11_66049704_66050343	24.0852	0.784656	0.209001	3.75431	0.000173818	0.00484524	CNIH2	-4044
chr12_90162820_90163509	23.711	0.97591	0.260036	3.75298	0.000174747	0.00486109	RNU6-148P	-14985
chr8_25085865_25086338	15.1676	1.08353	0.288721	3.75287	0.000174823	0.00486109	DOCK5	-43628
chr7_84041781_84042431	18.2084	1.16829	0.311422	3.75148	0.000175797	0.00487901	SEMA3A	-40174
chr11_82258303_82259189	17.4393	1.15574	0.308427	3.74721	0.000178814	0.00494427	SNORD112	23934
chr1_22345429_22346336	35.4113	0.810584	0.216333	3.74692	0.000179018	0.00494683	RP1-224A6.3	5126
chr4_124509336_124510825	53.8378	0.640728	0.171391	3.7384	0.000185193	0.00508589	RP11-93L9.1	60597
chr3_5167488_5168833	40.3198	0.851077	0.227743	3.737	0.000186229	0.0051049	ARL8B	-3584
chr21_35572434_35573196	24.9565	0.968006	0.259057	3.73665	0.000186486	0.00510881	AP000320.7	-126543
chr17_67753675_67754549	29.7419	0.879587	0.235455	3.73569	0.000187203	0.00511457	AC003051.1	-162750
chr2_64441619_64442087	10.8988	1.67124	0.447398	3.73547	0.000187362	0.00511457	AC074289.1	-71247
chr6_134694203_134695076	25.1004	0.882773	0.236422	3.73389	0.000188549	0.00514	SGK1	-55007
chr10_12232953_12234093	31.8557	0.796823	0.213472	3.73268	0.000189452	0.00515951	NUDT5	4031
chr21_48042102_48042870	29.9324	0.728955	0.195293	3.73262	0.000189496	0.00515951	PRMT2	12695
chr18_21103539_21104168	16.5057	1.31555	0.352604	3.73097	0.000190747	0.0051904	C18orf8	-20057
chr17_68523460_68524223	29.0147	0.920311	0.246728	3.73007	0.000191428	0.00520256	CTD-2378E21.1	-158403
chr4_101902441_101903897	52.0512	0.593712	0.159287	3.72732	0.00019353	0.00525328	EMCN-IT1	-167004
chr1_111186400_111187023	15.271	1.23944	0.332678	3.72564	0.000194824	0.00527584	AL365361.1	8631
chr5_164441356_164442643	32.047	0.875939	0.235217	3.72396	0.000196123	0.00529602	CTC-340A15.2	-717655
chr6_161966304_161967080	32.9588	0.844813	0.226913	3.72307	0.000196818	0.00530858	PARK2	1181724
chr2_202122174_202123696	43.9541	0.630677	0.169499	3.72083	0.00019857	0.0053348	CASP8	-23989
chr2_102528680_102529682	31.8088	0.810577	0.218159	3.71554	0.000202771	0.00542171	FLJ20373	-19726
chr8_17207106_17208071	47.6793	0.644869	0.173583	3.71506	0.000203159	0.00542533	MTMR7	62766
chr8_90794317_90794833	20.7785	1.04403	0.281071	3.71447	0.000203627	0.00543131	RIPK2	-24343
chr14_56182579_56183448	20.6832	0.870578	0.234654	3.71005	0.000207218	0.00550694	RP11-813I20.2	31478
chr3_129180571_129180994	11.8611	1.33118	0.359089	3.7071	0.000209645	0.00555547	IFT122	-21604
chr3_179326575_179327626	20.5015	1.0922	0.294625	3.70709	0.000209655	0.00555547	NDUFB5	-4086
chr15_51389647_51390441	24.5384	0.914923	0.246871	3.70607	0.000210497	0.00556454	RP11-108K3.1	-59963
chr15_51389647_51390441.1	24.5384	0.914923	0.246871	3.70607	0.000210497	0.00556454	TNFAIP8L3	7033
chrX_118819304_118820670	28.0888	0.806463	0.217597	3.70622	0.000210372	0.00556454	2020-09-06	6664
chr12_105368344_105368924	18.4303	1.08629	0.2932	3.70495	0.000211436	0.0055785	C12orf45	11193
chr14_42992728_42993347	20.5775	1.04885	0.283095	3.70496	0.000211422	0.0055785	CTD-2307P3.1	-160543
chr14_42992728_42993347.1	20.5775	1.04885	0.283095	3.70496	0.000211422	0.0055785	RP11-214N1.1	-110953
chr2_137013055_137013787	23.2537	0.983928	0.265589	3.7047	0.000211645	0.0055785	RN7SKP141	134115
chr20_46356116_46356860	35.9663	0.73811	0.199237	3.70469	0.000211652	0.0055785	SULF2	58501
chr10_121073059_121073713	26.563	0.885618	0.239171	3.70287	0.000213175	0.00560869	GRK5	-105959
chr4_103311585_103312163	21.8311	1.07671	0.291339	3.69574	0.000219248	0.00574472	SLC39A8	-37428
chr4_119946663_119947377	22.1286	1.13924	0.308355	3.69456	0.00022027	0.00576808	SYNPO2	-136668
chr19_55995981_55997005	44.2452	0.770072	0.208664	3.69049	0.000223819	0.00584384	NAT14	0
chr12_122931440_122931980	21.4568	1.00082	0.271549	3.68562	0.000228147	0.00592902	SNORA9	44809
chr6_11323577_11325190	40.0027	0.687295	0.186504	3.68514	0.000228574	0.0059332	NEDD9	57392
chr5_21765559_21766007	12.0878	1.58776	0.430894	3.68481	0.000228872	0.00593746	CDH12	1087725
chr5_21765559_21766007.1	12.0878	1.58776	0.430894	3.68481	0.000228872	0.00593746	RP11-804N13.1	-149189
chr2_197851802_197853258	38.7212	0.730411	0.198231	3.68464	0.000229027	0.00593804	PGAP1	-59283
chr8_37086596_37086985	16.152	1.20767	0.32779	3.68427	0.000229359	0.00594316	RP11-527N22.1	102518
chr6_28979080_28979566	13.3694	1.19155	0.32363	3.68183	0.000231562	0.00599328	ZNF311	-5987
chr1_92178545_92179485	31.4293	0.796748	0.216873	3.6738	0.000238974	0.00614935	TGFBR3	192408
chr11_86454347_86455162	20.6276	1.12332	0.305907	3.67209	0.000240572	0.00616933	CTD-2005H7.2	-15951
chr4_76559062_76559494	14.3249	1.31522	0.35813	3.67246	0.000240222	0.00616933	CDKL2	-3352
chr2_127707261_127707695	13.2186	1.16843	0.318212	3.67186	0.000240793	0.0061712	AC114783.1	-50771
chr1_149361891_149362993	24.9039	0.866491	0.236041	3.67093	0.00024167	0.00618657	FCGR1C	6335
chr12_118744861_118746193	34.4678	0.755912	0.205987	3.66971	0.000242824	0.00620539	TAOK3	64558
chr14_58999785_59002136	47.458	0.670135	0.182626	3.66945	0.000243076	0.00620828	KIAA0586	-105683
chr5_142216741_142217294	17.2743	1.3053	0.356432	3.66214	0.00025012	0.00634088	ARHGAP26	-66793
chr8_71554030_71554628	25.3207	0.888876	0.2429	3.65943	0.000252781	0.00639741	LACTB2	26782
chr8_71554030_71554628.1	25.3207	0.888876	0.2429	3.65943	0.000252781	0.00639741	RP11-382J12.1	-33219
chr13_24553579_24554659	22.9224	0.860348	0.235148	3.65875	0.000253444	0.0064088	RP11-307N16.6	0
chr13_24553579_24554659.1	22.9224	0.860348	0.235148	3.65875	0.000253444	0.0064088	RP11-309I15.1	0
chr13_24553579_24554659.2	22.9224	0.860348	0.235148	3.65875	0.000253444	0.0064088	SPATA13	0
chr10_11267721_11268600	28.2089	0.924783	0.252918	3.65646	0.000255722	0.0064535	CELF2	-207616
chr10_23701005_23701636	21.0282	1.04354	0.285556	3.6544	0.000257788	0.00649826	snoU13	-12477
chr3_40340586_40341887	38.7435	0.710538	0.194501	3.65313	0.000259063	0.00651392	EIF1B	9288
chr3_167370965_167372034	38.3106	0.724785	0.198539	3.6506	0.000261628	0.00655793	WDR49	0
chr3_5231917_5232419	14.7287	1.34665	0.368928	3.65017	0.000262064	0.00656518	EDEM1	-2560
chr8_17219847_17221038	41.7054	0.729672	0.199967	3.64896	0.000263304	0.00658999	MTMR7	49799
chr20_17524106_17524607	12.2845	1.47187	0.403466	3.64807	0.000264215	0.00659678	BFSP1	25259
chr17_7117034_7118526	33.2123	0.740891	0.203175	3.64656	0.000265777	0.00662833	DLG4	4496
chr16_83722840_83723344	14.6688	1.32793	0.36436	3.64456	0.00026785	0.00667257	CDH13	-1062271
chr5_40409800_40411480	42.4871	0.655886	0.180041	3.64298	0.0002695	0.00669869	AC108105.1	-89381
chr6_166188592_166189238	15.8871	1.08218	0.29705	3.6431	0.000269377	0.00669869	PDE10A	210747
chr6_166188592_166189238.1	15.8871	1.08218	0.29705	3.6431	0.000269377	0.00669869	RP11-252P19.1	-20916
chr6_166188592_166189238.2	15.8871	1.08218	0.29705	3.6431	0.000269377	0.00669869	RP11-252P19.2	0
chr11_102790589_102791636	33.457	0.843816	0.231658	3.64251	0.000269997	0.00670355	RNU7-159P	-15906
chr10_59917088_59917718	20.6474	1.09196	0.299845	3.64176	0.000270779	0.00671921	snoU13	80804
chr1_96881115_96882150	26.719	0.919986	0.25279	3.63933	0.00027335	0.00676793	RP5-898J17.1	-41434
chr6_155739232_155740105	33.0574	0.782132	0.214968	3.63836	0.000274379	0.00678963	NOX3	36933
chr11_60144980_60146311	44.465	0.613237	0.168584	3.63757	0.000275219	0.00680558	MS4A14	0
chr11_60144980_60146311.1	44.465	0.613237	0.168584	3.63757	0.000275219	0.00680558	MS4A7	0
chr7_127294659_127295595	27.8642	0.889291	0.244852	3.63195	0.000281283	0.00693348	SND1	-2426
chr7_158612755_158614458	29.271	0.843385	0.232331	3.63009	0.000283318	0.00697208	ESYT2	8487
chr2_206563703_206566026	49.8924	0.610567	0.168292	3.62803	0.000285598	0.00701653	NRP2	-16480
chr6_84023660_84023952	10.2119	1.67337	0.461235	3.62803	0.000285596	0.00701653	ME1	116839
chr12_10281132_10281735	23.7068	0.914711	0.252174	3.6273	0.000286402	0.00702853	CLEC7A	1122
chr6_158447410_158448230	24.2949	0.898657	0.247741	3.62741	0.000286279	0.00702853	SYNJ2	-44492
chr17_76333280_76334276	33.8675	0.744621	0.205466	3.62405	0.00029002	0.00709776	AC061992.2	-21471
chr2_172263660_172264346	16.177	1.01777	0.280966	3.62238	0.000291904	0.00713628	METTL8	26251
chr3_81533626_81535146	32.2763	0.801548	0.22129	3.62216	0.000292157	0.00713628	RNU2-28P	23481
chr5_146863738_146864256	13.2502	1.20526	0.332753	3.62209	0.000292235	0.00713628	DPYSL3	25364
chr15_52387642_52388305	19.5037	1.17677	0.32511	3.61961	0.000295049	0.00718528	CTD-2184D3.5	4416
chr12_10179989_10181012	35.1602	0.770184	0.212943	3.61686	0.000298198	0.007258	RP11-133L14.5	2194
chr8_54857319_54858302	48.2963	0.65662	0.181759	3.61258	0.000303166	0.00736684	RGS20	-92952
chr4_37390263_37390759	17.1563	1.21198	0.33572	3.61009	0.000306088	0.00743202	KIAA1239	-144422
chr2_7074059_7075693	40.2447	0.695975	0.192822	3.60942	0.000306878	0.00744062	RNF144A	-16537
chr7_30559983_30560724	27.478	0.716355	0.19855	3.60793	0.000308655	0.00746356	AC005154.6	73702
chr1_110336306_110337229	20.5263	1.0243	0.283948	3.60733	0.000309361	0.00747656	EPS8L3	-29657
chrX_16132230_16132682	10.3958	1.16262	0.322627	3.60361	0.000313832	0.00754775	GRPR	8997
chr6_2853798_2855389	46.665	0.68732	0.190757	3.60313	0.000314413	0.00755356	MIR4645	0
chr6_2853798_2855389.1	46.665	0.68732	0.190757	3.60313	0.000314413	0.00755356	RP11-420G6.4	26253
chr19_10456570_10457635	39.184	0.677836	0.188158	3.60249	0.000315187	0.00756806	ICAM3	-6071
chr2_169928616_169929513	38.0498	0.730929	0.203038	3.59995	0.000318272	0.00762569	DHRS9	-7318
chr3_167584032_167584474	12.5958	1.35544	0.376653	3.59863	0.000319894	0.00764807	RP11-298O21.2	0
chr3_167584032_167584474.1	12.5958	1.35544	0.376653	3.59863	0.000319894	0.00764807	RP11-298O21.3	4292
chr3_167584032_167584474.2	12.5958	1.35544	0.376653	3.59863	0.000319894	0.00764807	RP11-298O21.6	-1472
chr3_167584032_167584474.3	12.5958	1.35544	0.376653	3.59863	0.000319894	0.00764807	RP11-298O21.7	-1396
chr20_46631207_46631803	23.7546	0.828982	0.230603	3.59485	0.000324578	0.007731	RP11-347D21.3	-13719
chr4_140128538_140129977	43.1979	0.660904	0.18394	3.59303	0.00032685	0.00777264	RN7SL311P	-21944
chr16_9155163_9155951	24.2064	0.871705	0.242671	3.59212	0.000327997	0.00779576	RP11-473I1.6	6460
chr6_167507462_167509081	45.3644	0.646238	0.180078	3.58865	0.000332393	0.00787919	RP11-517H2.6	-94570
chr18_53545449_53545898	15.1204	1.02887	0.286787	3.58758	0.000333766	0.0079058	CTD-2008L17.1	14371
chr8_124586710_124587108	12.2555	1.28517	0.358279	3.58706	0.000334431	0.00791486	RP11-174I12.2	-5708
chr10_49842178_49842985	29.0903	0.780782	0.217848	3.58407	0.000338279	0.00798894	ARHGAP22	17677
chr18_18743713_18744996	32.7019	0.776762	0.217189	3.57643	0.000348319	0.00817403	RNU6-120P	-43246
chr6_158185047_158186216	47.7387	0.674612	0.188728	3.57451	0.000350883	0.00821686	SNX9	58080
chr16_10864655_10865300	19.317	1.04347	0.291981	3.57374	0.000351913	0.00823665	TVP23A	47343
chr22_24830054_24831024	44.8349	0.607333	0.16995	3.5736	0.000352109	0.0082369	ADORA2A	-6525
chr22_24830054_24831024.1	44.8349	0.607333	0.16995	3.5736	0.000352109	0.0082369	ADORA2A-AS1	59745
chr22_24830054_24831024.2	44.8349	0.607333	0.16995	3.5736	0.000352109	0.0082369	SPECC1L-ADORA2A	-163189
chr17_12733795_12734893	29.584	0.764787	0.214272	3.56922	0.000358039	0.00836244	RP11-1090M7.1	-40236
chr1_206752955_206753863	36.3157	0.752899	0.21116	3.56553	0.000363123	0.00846444	EIF2D	32042
chr1_206752955_206753863.1	36.3157	0.752899	0.21116	3.56553	0.000363123	0.00846444	RASSF5	-72077
chr2_42193230_42194760	45.7304	0.608687	0.170705	3.56573	0.000362846	0.00846444	C2orf91	-11824
chr3_23780832_23782497	41.6494	0.799319	0.224182	3.5655	0.000363166	0.00846444	AC020626.1	26605
chr1_111189867_111190492	18.093	1.11939	0.314047	3.5644	0.000364688	0.00849174	AL365361.1	5162
chr19_4754124_4754608	12.7582	1.1053	0.310174	3.56348	0.000365976	0.00851655	MIR7-3HG	14544
chr14_88082449_88084193	37.1954	0.670358	0.188414	3.55789	0.000373845	0.00863647	CTD-2007A10.1	37446
chr2_219670872_219671542	31.2059	0.741355	0.208448	3.55654	0.00037577	0.00867192	CYP27A1	-24394
chr8_101639207_101639764	17.451	1.04148	0.292968	3.55492	0.000378088	0.00871639	SNX31	22130
chr5_142601792_142602786	31.9066	0.716457	0.201648	3.55301	0.000380848	0.00876639	ARHGAP26	-451844
chr2_39604483_39605124	21.8202	1.04076	0.293091	3.55097	0.000383816	0.00882558	MAP4K3	59330
chr4_114820840_114821517	25.8861	0.819926	0.23093	3.55054	0.000384449	0.00883557	ARSJ	79367
chr6_88428593_88429295	21.059	1.00802	0.283958	3.54988	0.000385406	0.00885301	snoU13	1338
chr3_127451848_127452309	14.5995	0.999254	0.281543	3.5492	0.000386399	0.00886793	MGLL	2892
chr3_15835766_15836590	21.1375	1.07434	0.302725	3.54889	0.000386854	0.00887253	ANKRD28	64689
chr2_238571236_238571801	19.9589	0.93264	0.263024	3.54583	0.000391374	0.00896696	LRRFIP1	-35018
chr4_132347373_132348579	29.449	0.786239	0.221916	3.54295	0.000395673	0.00904219	RP11-314N14.1	58533
chr20_38968416_38969080	22.9566	0.85196	0.240535	3.54193	0.000397205	0.00906789	SNORD112	76435
chr8_81446231_81447100	36.9171	0.768312	0.216978	3.54097	0.000398662	0.00909649	RP11-48B3.3	4271
chr3_5031706_5032270	16.1559	1.17444	0.331838	3.53921	0.000401327	0.00914322	BHLHE40-AS1	-10060
chr3_98528381_98528936	17.1102	1.21651	0.343954	3.53685	0.00040493	0.00921589	DCBLD2	91598
chr15_40230964_40232076	22.4426	0.978801	0.276765	3.53657	0.000405352	0.0092191	EIF2AK4	-4588
chr6_68718059_68718817	19.3939	0.997374	0.282024	3.53649	0.000405486	0.0092191	RP11-542F9.1	46426
chr1_31584030_31584538	14.1304	1.11967	0.316686	3.5356	0.000406845	0.0092453	PUM1	-45192
chr1_163148328_163148931	15.7982	1.03687	0.293406	3.53391	0.000409461	0.00929051	RGS5	23763
chr1_163148328_163148931.1	15.7982	1.03687	0.293406	3.53391	0.000409461	0.00929051	RP11-267N12.1	-16864
chr3_124844400_124845227	29.2468	0.906909	0.256682	3.5332	0.000410559	0.00930593	SLC12A8	86383
chr22_23483982_23484644	29.7162	0.720774	0.204133	3.5309	0.000414148	0.00936345	RTDR1	2565
chr8_129054169_129054923	29.1112	0.788413	0.223414	3.52893	0.000417248	0.00941442	MIR1207	6475
chr2_102720780_102721284	13.7708	1.33189	0.377889	3.52456	0.000424183	0.00956118	IL1R1	-33945
chr1_174907764_174908201	13.5035	1.21891	0.345914	3.52373	0.000425521	0.00958164	RABGAP1L	-779217
chr1_174907764_174908201.1	13.5035	1.21891	0.345914	3.52373	0.000425521	0.00958164	RP1-102G20.5	15198
chr4_15661244_15661803	24.5936	0.886041	0.251706	3.52014	0.000431313	0.00970715	FBXL5	21500
chr2_43532101_43533183	22.7293	0.878686	0.249701	3.51895	0.000433253	0.00974589	THADA	290003
chr1_116270260_116271205	32.6099	0.715786	0.203461	3.51805	0.000434729	0.00976922	CASQ2	40198
chr8_41894658_41895724	35.79	0.78457	0.22301	3.51809	0.000434671	0.00976922	KAT6A	13782
chr17_8054335_8055961	37.5977	0.673033	0.191729	3.51033	0.000447548	0.0100219	PER1	3718
chr17_8054335_8055961.1	37.5977	0.673033	0.191729	3.51033	0.000447548	0.0100219	RP11-599B13.6	10333
chr17_47753421_47754253	32.6905	0.669049	0.19073	3.50783	0.000451775	0.0100912	SPOP	1344
chr12_49616146_49616932	30.3123	0.702359	0.200302	3.5065	0.000454049	0.0101318	TUBA1C	-13818
chr5_106723614_106725694	45.6875	0.678769	0.193646	3.5052	0.000456259	0.0101658	EFNA5	280635
chr2_64418875_64420498	34.4493	0.758477	0.216506	3.50325	0.000459614	0.0102303	AC074289.1	-48503
chr2_64418875_64420498.1	34.4493	0.758477	0.216506	3.50325	0.000459614	0.0102303	LINC00309	12122
chr6_37597857_37598747	29.7449	0.791146	0.225873	3.50261	0.00046073	0.0102449	MDGA1	67020
chr15_51921499_51922278	25.3118	0.76782	0.219456	3.49874	0.000467456	0.0103686	DMXL2	-6469
chr8_138946419_138947078	27.0052	0.916451	0.261977	3.49821	0.000468393	0.010379	RP11-238K6.1	148736
chr19_17249162_17249778	32.7353	0.741035	0.212126	3.49337	0.000476972	0.0105429	MYO9B	-62572
chr6_132388461_132389048	14.387	1.09745	0.314273	3.49204	0.000479355	0.0105798	RP11-69I8.3	-116376
chr6_146919797_146920370	20.3268	0.856459	0.245461	3.48918	0.000484506	0.0106618	ADGB	0
chr6_146919797_146920370.1	20.3268	0.856459	0.245461	3.48918	0.000484506	0.0106618	RP11-715G15.1	0
chr13_28842537_28843839	59.1086	0.621605	0.178163	3.48897	0.000484888	0.0106645	PAN3	-129895
chr8_120667264_120668336	42.3187	0.642707	0.18434	3.48653	0.000489339	0.0107416	RN7SKP153	56050
chr3_27631834_27633130	37.8205	0.719493	0.206572	3.48301	0.000495815	0.0108309	RP11-222K16.1	46676
chr15_63771682_63772550	29.3912	0.72459	0.20811	3.48176	0.000498122	0.0108754	AC007950.1	-10132
chr5_39759696_39761378	41.6483	0.670212	0.192569	3.48037	0.000500717	0.0109189	CTD-2078B5.2	-239164
chr7_11469739_11470749	24.8868	0.817608	0.235041	3.47858	0.000504075	0.0109784	AC004538.3	-248381
chr7_11469739_11470749.1	24.8868	0.817608	0.235041	3.47858	0.000504075	0.0109784	THSD7A	401076
chr14_40265902_40266284	10.4025	1.28603	0.369827	3.47737	0.000506349	0.0110124	RP11-111A21.1	-321843
chr5_158886806_158887701	24.5858	0.820178	0.236066	3.47436	0.000512083	0.0111039	AC008703.1	5584
chr17_21190887_21191896	33.6831	0.693998	0.199896	3.4718	0.000516982	0.0111806	MAP2K3	-2904
chr17_67111935_67112698	34.4498	0.710905	0.20477	3.47173	0.000517124	0.0111806	ABCA6	25332
chr1_84348540_84349060	15.4044	1.05593	0.304527	3.46745	0.000525427	0.0113381	TTLL7	115756
chr8_103120019_103120678	23.144	0.783699	0.226158	3.46527	0.000529702	0.0114192	MIR5680	16982
chr8_94766775_94767728	37.7996	0.606901	0.175202	3.464	0.000532201	0.0114676	TMEM67	0
chr1_182118346_182118992	21.5136	0.977319	0.282154	3.46377	0.000532656	0.0114718	GS1-122H1.2	94543
chr13_28818880_28821098	44.7975	0.595382	0.172017	3.46119	0.0005378	0.0115602	PAN3	-106238
chr3_121721953_121722419	12.8765	1.18697	0.343031	3.46023	0.000539708	0.0115945	ILDR1	18633
chr7_22701568_22703379	45.8692	0.594349	0.171777	3.46	0.000540175	0.0115945	AC002480.2	1774
chr5_40378459_40379686	32.8249	0.654554	0.189403	3.45588	0.000548505	0.0117563	AC108105.1	-58040
chr17_62251966_62252867	30.4828	0.733893	0.212396	3.4553	0.000549677	0.0117701	TEX2	87795
chr21_32711887_32712415	12.1289	1.30266	0.377101	3.4544	0.000551518	0.0117913	TIAM1	219876
chr9_130856181_130856937	27.511	0.83306	0.241166	3.4543	0.000551727	0.0117913	RP11-379C10.4	0
chr9_130856181_130856937.1	27.511	0.83306	0.241166	3.4543	0.000551727	0.0117913	SLC25A25	-25702
chr15_31735688_31736574	26.4361	0.829369	0.240252	3.45208	0.000556276	0.01186	KLF13	-116631
chr7_41515545_41516422	20.4129	0.975896	0.282718	3.45184	0.00055678	0.0118639	INHBA-AS1	217092
chr3_599657_599920	10.4599	1.65355	0.479352	3.44956	0.000561509	0.0119487	AC090044.1	-21744
chr7_151348038_151348513	10.9947	1.42241	0.412425	3.44889	0.000562897	0.0119668	PRKAG2	225698
chr6_14123783_14124377	14.8647	1.16075	0.336606	3.44839	0.000563943	0.0119833	CD83	-5912
chr22_45016007_45016672	13.3809	1.11525	0.323489	3.44758	0.00056564	0.012004	LINC00229	4628
chr21_32573323_32574285	29.561	0.80766	0.234292	3.44724	0.000566347	0.0120115	TIAM1	358006
chr7_123903435_123903802	12.0274	1.22017	0.353976	3.44705	0.000566747	0.0120142	RP5-921G16.1	-231177
chr17_73424708_73425358	20.3167	0.969562	0.28152	3.44403	0.00057311	0.0121088	RNU6-938P	-19439
chr3_99614541_99615427	26.5221	0.825272	0.239731	3.44249	0.000576388	0.0121434	CMSS1	-77864
chr3_99614541_99615427.1	26.5221	0.825272	0.239731	3.44249	0.000576388	0.0121434	FILIP1L	217931
chr6_88441506_88442481	31.0798	0.794225	0.230711	3.44252	0.000576332	0.0121434	snoU13	-10874
chr5_59947943_59948530	18.0814	0.995905	0.289334	3.44206	0.000577304	0.012157	DEPDC1B	47459
chr4_12120180_12120655	17.9149	1.08122	0.314299	3.4401	0.000581499	0.0122164	RP11-168E17.1	104451
chr2_161522528_161523671	28.6414	0.771889	0.224676	3.43556	0.000591335	0.0123647	RBMS1	-172223
chr2_122367703_122370033	41.6783	0.636495	0.185306	3.43482	0.000592938	0.0123866	CLASP1	37131
chr11_35954100_35954755	23.0674	0.97848	0.285292	3.42975	0.00060414	0.0126029	LDLRAD3	10776
chr8_19066741_19067504	32.9682	0.776728	0.226534	3.42875	0.000606367	0.0126375	RP11-1080G15.1	25684
chr17_66905095_66905821	29.0416	0.748816	0.218689	3.42412	0.000616799	0.0128189	ABCA8	45672
chr7_108054299_108054784	12.3403	1.1697	0.341624	3.42393	0.000617234	0.0128219	NRCAM	41982
chr10_64261202_64261724	14.2244	1.3183	0.385685	3.41808	0.000630652	0.013058	ZNF365	-127252
chr19_35645476_35646422	31.141	0.722565	0.21139	3.41817	0.000630448	0.013058	FXYD5	0
chr1_65398869_65400333	34.7337	0.754458	0.22094	3.41477	0.000638355	0.0131991	JAK1	31855
chr16_10419487_10419928	12.0188	1.1737	0.343708	3.41482	0.000638237	0.0131991	RP11-609N14.1	26682
chr11_61739060_61740507	39.3695	0.646829	0.189668	3.41032	0.000648866	0.0133482	AP003733.1	-3608
chr16_19504875_19505518	28.2769	0.748495	0.219628	3.40801	0.000654396	0.0134186	TMC5	-83015
chr12_123222693_123223586	16.7454	1.04243	0.306086	3.40568	0.000659987	0.0135021	HCAR1	-7303
chr15_67316459_67317233	29.9294	0.733812	0.215577	3.40394	0.00066422	0.0135772	RP11-798K3.2	34359
chr14_58747819_58748596	21.2691	0.959108	0.281869	3.40267	0.000667309	0.0136269	RP11-349A22.5	16257
chr16_23868778_23870283	39.979	0.658259	0.193524	3.40143	0.000670353	0.0136657	CHP2	-102831
chr22_43327224_43328443	36.1145	0.687719	0.202198	3.40121	0.000670874	0.0136683	PACSIN2	82709
chr3_130262080_130262591	18.4804	0.941862	0.277311	3.39641	0.000682766	0.0138221	COL6A6	16587
chr10_105991763_105992306	14.4713	0.890341	0.262274	3.3947	0.000687029	0.0138768	WDR96	0
chr2_208378066_208378985	22.6751	0.918743	0.271147	3.38836	0.000703116	0.0141395	CREB1	83087
chr10_17517919_17518656	24.1922	0.859769	0.25382	3.38732	0.000705789	0.014183	ST8SIA6	-21590
chr11_61730523_61732474	41.9688	0.673471	0.199143	3.38185	0.000719986	0.0144052	BEST1	-12989
chr11_61730523_61732474.1	41.9688	0.673471	0.199143	3.38185	0.000719986	0.0144052	FTH1	2630
chr3_122232845_122234013	34.7547	0.600465	0.177803	3.37714	0.000732427	0.0146016	KPNA1	0
chr22_50767827_50768806	20.6214	0.852505	0.252687	3.37376	0.000741502	0.014738	DENND6B	-2338
chr1_65360858_65361719	27.1874	0.891267	0.264312	3.37203	0.000746165	0.0148092	JAK1	70469
chr12_6539479_6540167	21.7846	0.963933	0.286126	3.36891	0.000754669	0.0149234	CD27	13866
chr6_15426912_15428099	22.3587	0.919121	0.272831	3.36883	0.000754887	0.0149234	JARID2	-180386
chr6_2542931_2543708	33.6535	0.752237	0.223335	3.3682	0.000756607	0.0149432	C6orf195	91130
chr17_73860361_73861076	14.7633	1.18635	0.352267	3.36777	0.000757792	0.0149599	WBP2	-8945
chr13_114619013_114619877	37.0972	0.643792	0.1913	3.36535	0.000764467	0.0150583	LINC00452	-27735
chr21_23793754_23794271	12.1239	1.02503	0.304901	3.36185	0.000774217	0.0151832	AP000959.2	98107
chr9_34178793_34180413	41.641	0.641839	0.190993	3.36054	0.000777892	0.0152485	UBAP1	0
chr9_130595809_130596539	20.5807	0.942458	0.280523	3.35964	0.000780437	0.015285	ENG	20497
chr2_99071130_99072560	28.6508	0.716222	0.213279	3.35814	0.000784681	0.0153478	INPP4A	-9814
chr3_121830767_121831244	17.9156	1.04334	0.310687	3.35817	0.000784606	0.0153478	CD86	-56555
chr2_62266370_62266934	23.4549	0.763011	0.227238	3.35776	0.000785772	0.0153557	COMMD1	-150512
chr4_8080631_8081234	17.0345	0.925956	0.276029	3.35456	0.000794913	0.0154799	ABLIM2	79326
chr15_73077601_73078189	25.066	0.806677	0.240567	3.35323	0.000798738	0.0155289	ADPGK-AS1	-2426
chr1_28743875_28744405	18.0584	1.10915	0.330883	3.35208	0.000802066	0.0155715	PHACTR4	-47762
chr12_29323010_29324054	21.169	0.932103	0.27813	3.35132	0.000804269	0.0156007	FAR2	-20868
chr5_172314006_172314438	14.6213	1.05402	0.315055	3.34552	0.000821281	0.0158685	ERGIC1	-52593
chr1_120858525_120859559	12.008	1.29252	0.386422	3.34485	0.000823269	0.01589	RP11-439A17.7	-20182
chr2_112456270_112456953	27.971	0.835918	0.249917	3.34478	0.000823468	0.01589	MIR4771-1	71759
chr12_90127236_90128017	48.0896	0.691837	0.20693	3.34334	0.000827769	0.0159592	RNA5SP365	-6524
chr10_28780796_28781583	23.2695	0.984491	0.294671	3.34098	0.000834836	0.0160676	RP11-351M16.3	3160
chr12_90115299_90115839	13.011	1.11928	0.335259	3.33854	0.000842185	0.0161671	RNA5SP365	4874
chr2_218559373_218560231	21.5556	0.855985	0.256428	3.3381	0.000843524	0.016183	DIRC3	61048
chr12_89560112_89560828	22.7071	0.812608	0.243463	3.33771	0.000844708	0.0161946	RP11-13A1.3	142503
chr3_113617678_113618377	17.9889	0.970287	0.290738	3.33732	0.000845892	0.0162064	GRAMD1C	-8207
chr20_46364437_46365147	23.0635	0.877349	0.262949	3.33657	0.000848199	0.0162405	SULF2	50214
chr2_207662600_207663172	16.4973	1.15476	0.346618	3.3315	0.000863781	0.0164822	MIR3130-1	-14643
chr18_10057158_10058831	48.1908	0.609874	0.183145	3.33	0.000868462	0.0165431	AP005271.1	-51964
chr1_246241402_246242349	19.9197	0.880659	0.264549	3.32891	0.000871862	0.0165691	RP11-36N20.1	29579
chr6_138111463_138112010	17.1321	0.915976	0.275489	3.32491	0.000884459	0.0167333	RP11-356I2.1	-51343
chr5_176843048_176843639	11.916	1.20307	0.361959	3.32377	0.0008881	0.0167808	F12	-6471
chr21_46387821_46388551	36.7057	0.75469	0.227071	3.32359	0.000888678	0.0167846	FAM207A	-27897
chr11_35186773_35188047	29.0177	0.804228	0.242048	3.3226	0.000891824	0.0168226	CD44	-25923
chr18_9482632_9483243	17.9911	0.964513	0.290369	3.32167	0.000894789	0.01685	RALBP1	-7626
chr3_172468066_172469457	36.3193	0.623418	0.18768	3.3217	0.000894711	0.01685	ECT2	0
chr19_18625585_18626087	21.1338	0.862771	0.259892	3.31972	0.000901063	0.0169538	ELL	6851
chr1_241971413_241972067	15.9548	0.922802	0.278356	3.31518	0.000915835	0.0171586	EXO1	39415
chr20_42846240_42846563	10.7595	1.57069	0.473769	3.3153	0.000915433	0.0171586	OSER1-AS1	-6609
chr15_57853371_57854017	17.6547	0.976965	0.294746	3.3146	0.000917746	0.0171661	GCOM1	30089
chr1_112040009_112040691	16.738	0.985628	0.297406	3.31409	0.000919427	0.0171903	ADORA3	65894
chr12_10364734_10366383	54.296	0.598863	0.180729	3.3136	0.000921025	0.0172057	GABARAPL1	0
chr3_31273817_31274713	30.8443	0.707583	0.213607	3.31254	0.000924522	0.0172421	RNA5SP127	-3611
chr2_68498747_68500347	44.2837	0.650422	0.19653	3.30954	0.0009345	0.01737	AC017083.3	0
chr6_88617117_88617762	27.1538	0.785679	0.237576	3.30706	0.000942797	0.017495	AL138919.1	-59767
chr8_81052795_81053311	16.7956	1.01695	0.307971	3.30209	0.000959665	0.0177267	TPD52	30584
chr22_29512717_29513183	10.7617	1.31644	0.398845	3.30064	0.000964657	0.0178115	KREMEN1	-43652
chr13_49553803_49554754	29.9374	0.753453	0.228521	3.29709	0.000976937	0.0179847	FNDC3A	-3756
chr2_238190489_238191084	20.8287	1.03635	0.314308	3.29725	0.000976377	0.0179847	AC112715.2	-24756
chr9_18393242_18394180	22.7887	0.870067	0.263883	3.29718	0.000976622	0.0179847	RP11-570H19.2	-31024
chr7_83965469_83966119	20.7761	0.884724	0.268377	3.29657	0.000978719	0.0180033	SEMA3A	35489
chr22_40828003_40828625	15.0838	1.10847	0.336451	3.29458	0.00098569	0.0180948	MKL1	204071
chr20_45324292_45325178	20.6991	0.895094	0.271941	3.2915	0.000996535	0.018255	RP1-28H20.3	-5995
chr2_52117068_52117552	13.668	1.34294	0.40821	3.28982	0.00100252	0.0183325	AC007682.1	-857330
chr10_72544985_72545413	12.567	1.06308	0.323359	3.28762	0.00101037	0.0184187	TBATA	0
chr13_42037405_42037915	15.3722	1.006	0.306108	3.28641	0.00101472	0.0184602	RGCC	-5711
chr17_40358346_40358786	13.5267	1.1699	0.356106	3.28524	0.00101894	0.0185143	STAT5B	69639
chr8_20079729_20080722	40.1842	0.665937	0.202702	3.2853	0.00101873	0.0185143	RNU6-892P	6568
chr6_74405222_74406192	21.8436	0.878277	0.267365	3.28493	0.00102008	0.0185274	CD109	0
chr6_74405222_74406192.1	21.8436	0.878277	0.267365	3.28493	0.00102008	0.0185274	RP11-553A21.3	0
chr6_126265345_126266098	22.224	1.02651	0.312683	3.2829	0.00102745	0.0186186	HINT3	11829
chr6_51116249_51116575	11.1638	1.54193	0.470005	3.28068	0.00103558	0.0187478	SNORD66	212913
chr3_9757288_9757945	21.3267	0.921717	0.281077	3.27924	0.00104088	0.0188361	CPNE9	-11798
chr10_70805040_70805864	28.1782	0.754841	0.230212	3.2789	0.00104214	0.0188512	SRGN	41998
chr2_197075859_197076499	26.7955	0.710769	0.216857	3.27759	0.00104698	0.0189158	HECW2	150448
chr6_158088033_158088904	20.3087	0.856143	0.261356	3.27578	0.00105372	0.0190066	ZDHHC14	-285869
chr9_123165193_123166141	30.576	0.70327	0.214747	3.27487	0.0010571	0.0190599	CDK5RAP2	176296
chr14_21262733_21263433	23.677	0.853171	0.260701	3.2726	0.00106563	0.0191595	RNASE1	8005
chr11_33232559_33234357	46.593	0.611828	0.187255	3.26736	0.00108555	0.0194625	HIPK3	43861
chr6_17907551_17908411	28.7748	0.670125	0.205132	3.26681	0.00108767	0.0194928	KIF13A	79444
chr7_108056078_108057192	27.9891	0.733445	0.224733	3.26363	0.00109995	0.0196574	NRCAM	39574
chr1_109913369_109914484	28.8656	0.810794	0.248621	3.26116	0.00110958	0.0198061	SORT1	26090
chr1_19761518_19762098	16.8213	0.990378	0.303748	3.26053	0.00111205	0.0198179	CAPZB	49910
chr14_102342508_102343379	31.1437	0.901288	0.276475	3.25992	0.00111442	0.0198522	CTD-2017C7.1	-36640
chr12_2445460_2446097	20.2325	0.941654	0.288963	3.25873	0.00111912	0.0199157	CACNA1C	-282997
chr6_134757143_134758836	47.913	0.617525	0.189517	3.25842	0.00112035	0.019926	RP11-557H15.3	82888
chr19_31795618_31796554	40.6713	0.682265	0.20941	3.25803	0.00112187	0.019945	TSHZ3	43900
chr2_122479643_122480455	20.601	0.980234	0.301058	3.25597	0.00113006	0.0200505	MKI67IP	14045
chr15_47144647_47145236	12.4273	1.25492	0.38559	3.25456	0.00113569	0.0201344	AC087433.1	104580
chr1_55660466_55661420	27.3594	0.802545	0.246619	3.25419	0.00113714	0.0201522	USP24	19367
chr8_53372625_53373655	42.7111	0.59778	0.183753	3.25316	0.00114127	0.0201771	ST18	-50120
chr2_59386333_59386743	11.5785	1.19978	0.368838	3.25285	0.00114252	0.0201912	AC007131.1	58100
chr14_55769428_55770990	31.0809	0.737177	0.226691	3.25191	0.00114634	0.0202425	FBXO34	-31408
chr14_88097075_88097638	12.5369	1.10915	0.341111	3.25157	0.00114768	0.0202582	CTD-2007A10.1	24001
chr9_297014_297924	26.4799	0.806277	0.248078	3.2501	0.00115366	0.0203477	DOCK8	-23945
chr21_30568474_30569207	21.3079	0.867511	0.267027	3.24878	0.00115901	0.0204339	LINC00189	-2660
chr11_35051375_35052841	35.6146	0.709627	0.218475	3.2481	0.00116178	0.0204585	PDHX	-45196
chr12_57845903_57846375	13.4981	1.17219	0.361014	3.24695	0.00116651	0.0205255	INHBE	0
chr6_30749433_30750030	28.5982	0.784396	0.24168	3.2456	0.00117205	0.0206066	HCG20	-14832
chr10_91055425_91056526	27.8388	0.870529	0.268399	3.24342	0.00118106	0.0206998	LIPA	117789
chr12_107722390_107723911	41.6432	0.639332	0.197117	3.24341	0.00118108	0.0206998	BTBD11	-10201
chr8_71227569_71228547	37.8955	0.70084	0.216089	3.2433	0.00118153	0.0206998	NCOA2	87494
chr9_113830268_113831703	45.1686	0.589343	0.181704	3.24343	0.001181	0.0206998	RNY4P18	27991
chr9_111231698_111232568	23.1494	0.774065	0.238749	3.24216	0.00118626	0.02075	AL137019.1	-110489
chr12_46956042_46957077	26.8523	0.730002	0.225483	3.2375	0.00120581	0.0210094	RP11-446N19.1	-24758
chr7_142936712_142937783	28.9265	0.810379	0.250356	3.23691	0.00120832	0.0210449	AC073342.1	-17352
chr4_40115613_40116172	14.3603	1.09645	0.338819	3.2361	0.00121174	0.0210785	N4BP2	-57168
chr8_18836194_18837079	42.4333	0.611568	0.188984	3.23609	0.00121181	0.0210785	PSD3	34118
chrX_20412978_20413643	13.0397	0.964112	0.29792	3.23615	0.00121155	0.0210785	RN7SKP183	56583
chr8_20058137_20058693	25.106	0.800895	0.247571	3.23502	0.00121636	0.021127	ATP6V1B2	-3260
chr2_12013821_12014302	12.7919	1.32327	0.409178	3.23398	0.00122079	0.0211875	MIR4262	-36709
chr1_166480948_166481321	10.4071	1.42212	0.43977	3.23378	0.00122163	0.0211938	RP11-276E17.2	-21672
chr2_35140167_35141272	31.3125	0.667341	0.206646	3.2294	0.00124052	0.0214797	AC012593.1	-83723
chr4_26077546_26078951	35.1804	0.626004	0.193881	3.22881	0.00124305	0.0215152	SMIM20	-161616
chr8_59768788_59769382	20.6278	0.887303	0.274833	3.22852	0.00124433	0.0215289	TOX	262386
chr8_144713182_144714165	22.2208	0.85424	0.264714	3.22703	0.00125081	0.0216172	RP11-661A12.12	1762
chr5_142137837_142138755	36.7287	0.663222	0.205554	3.2265	0.00125312	0.0216473	AC005592.1	-12673
chr14_102290689_102291716	30.4782	0.690875	0.2142	3.22537	0.00125811	0.0217037	PPP2R5C	-62483
chr5_147565699_147566408	19.8636	0.904746	0.280531	3.22511	0.00125922	0.0217037	SPINK6	15996
chr10_106110846_106111518	20.5685	0.915752	0.284032	3.22412	0.00126361	0.0217364	CCDC147-AS1	1816
chr12_102189394_102189881	12.5909	1.16857	0.363097	3.21835	0.00128932	0.0221012	GNPTAB	34836
chr10_82773524_82774240	21.5836	0.88256	0.274344	3.21698	0.00129546	0.0221723	AL356154.1	130168
chr12_1654201_1654781	19.742	0.935235	0.290928	3.21466	0.00130599	0.0222924	LINC00942	-37717
chr13_76063945_76064419	17.1038	1.12637	0.350536	3.21329	0.00131223	0.0223561	TBC1D4	-7695
chr19_4976158_4976810	28.5761	0.771239	0.240011	3.21334	0.00131199	0.0223561	KDM4B	-7027
chr10_52300136_52300853	24.2571	0.859441	0.267545	3.21233	0.00131663	0.0223912	SGMS1	82891
chr16_85088947_85089528	28.1372	0.785155	0.244447	3.21196	0.00131831	0.0223912	KIAA0513	-27538
chr16_86051845_86052861	28.2977	0.677805	0.211023	3.212	0.00131814	0.0223912	RP11-542M13.2	-36490
chr5_148865209_148865986	14.7909	1.03844	0.32326	3.21239	0.00131637	0.0223912	CTB-89H12.4	14831
chr11_107552872_107554327	33.9826	0.636837	0.198375	3.21028	0.00132607	0.0224887	AP002353.1	28671
chr2_158998710_158999853	42.0432	0.648399	0.201999	3.20991	0.00132774	0.0225084	UPP2-IT1	-14242
chr1_40352455_40353049	10.2247	1.25684	0.391595	3.20953	0.0013295	0.0225297	TRIT1	-3277
chr10_12312532_12313409	21.617	0.888992	0.27709	3.20831	0.00133517	0.0226171	RN7SL232P	-8863
chr12_76371507_76372308	26.5168	0.754557	0.235206	3.20807	0.00133631	0.0226277	RP11-114H23.1	5488
chr5_126097849_126098497	18.7089	0.986178	0.307421	3.20791	0.00133705	0.0226317	RP11-434D11.4	13682
chr9_130834475_130835321	28.3232	0.836597	0.260823	3.20752	0.00133883	0.0226446	SLC25A25	-3996
chr22_41259832_41260422	13.7981	1.05198	0.328247	3.20484	0.00135136	0.0228219	XPNPEP3	-6732
chr15_86098098_86098875	22.9948	0.866602	0.270708	3.20125	0.00136835	0.0230738	AKAP13	-174228
chr1_108683992_108684904	29.2024	0.72155	0.225539	3.19923	0.00137797	0.0231687	SLC25A24	58568
chr9_84402623_84403375	13.1016	1.19949	0.374948	3.19908	0.00137866	0.0231687	AL158154.1	17622
chr20_43681554_43682855	26.5202	0.868247	0.271446	3.19861	0.00138094	0.0231982	STK4	-86440
chr17_25856117_25856948	27.2669	0.711064	0.222448	3.19654	0.00139086	0.0233385	RP11-720N19.2	-63980
chr5_142729833_142730907	28.1842	0.771506	0.24152	3.19438	0.00140131	0.0234629	NR3C1	84171
chr1_65422248_65422992	21.4595	0.882882	0.276572	3.19223	0.00141179	0.0236007	JAK1	9196
chr1_221173627_221174321	21.6756	0.868432	0.272078	3.19185	0.00141365	0.0236145	HLA-AS1	-120145
chr3_171918881_171919581	14.8276	0.937245	0.293637	3.19184	0.00141368	0.0236145	FNDC3B	-161464
chr10_6958519_6959533	27.0107	0.846683	0.265366	3.19062	0.00141968	0.0236615	RP11-799O21.2	2902
chrX_66133772_66134402	14.0246	0.937373	0.294233	3.18582	0.00144344	0.02395	RNU6-394P	-237566
chr19_52288005_52288691	39.918	0.624573	0.196064	3.18555	0.0014448	0.0239636	FPR3	9725
chr13_36991551_36992849	48.2863	0.633896	0.19903	3.18493	0.00144791	0.0239884	CCNA1	13191
chr19_30153145_30154270	36.8602	0.6566	0.206239	3.18368	0.00145417	0.0240741	PLEKHF1	1693
chr13_80025615_80026152	21.6973	0.920849	0.289453	3.18134	0.00146596	0.024238	NDFIP2-AS1	29215
chr8_134911269_134912079	33.9279	0.676564	0.212728	3.18042	0.0014706	0.0242812	RP11-157E21.1	-12531
chr5_88182329_88183069	15.9539	1.21406	0.382217	3.17635	0.0014914	0.0245172	MEF2C	16854
chr5_88182329_88183069.1	15.9539	1.21406	0.382217	3.17635	0.0014914	0.0245172	MEF2C-AS1	-3185
chr9_117080021_117080621	12.9613	0.933387	0.293998	3.1748	0.00149938	0.0246302	ORM1	4715
chr7_80261347_80261872	12.1412	1.30538	0.411197	3.17458	0.00150053	0.02464	CD36	-262457
chr11_108958577_108959332	31.6628	0.777716	0.245139	3.17255	0.00151105	0.024767	RNA5SP349	32382
chr2_24839525_24840010	12.7928	1.23482	0.389461	3.17058	0.00152136	0.0248902	NCOA1	-124725
chr4_22383792_22384357	19.8862	0.76754	0.242148	3.16972	0.00152586	0.0249455	snoU13	-32720
chr1_219261963_219262795	28.1788	0.613626	0.193709	3.16777	0.00153611	0.0250671	RP11-135J2.4	84509
chr4_55604208_55604756	14.8554	1.07752	0.34026	3.16676	0.00154146	0.0251268	KIT	-80124
chr17_5429884_5430531	21.9914	0.803894	0.253898	3.1662	0.00154442	0.0251382	NLRP1	57321
chr16_82229364_82230015	16.0379	1.00043	0.316049	3.16542	0.00154862	0.025188	RN7SKP190	-2969
chr4_140480733_140482337	36.8937	0.636837	0.201199	3.1652	0.00154975	0.025188	RP11-342I1.2	-2781
chr11_121289265_121289887	21.1717	0.863403	0.272872	3.16414	0.00155544	0.025253	RP11-730K11.1	33836
chr16_19221530_19222312	29.7683	0.748682	0.236683	3.16322	0.00156033	0.0253171	SYT17	-41949
chr22_48479911_48480550	18.4115	0.895974	0.283459	3.16086	0.00157305	0.0254732	CTA-280A3__B.2	-35545
chr19_14157747_14158291	22.0264	0.876393	0.277525	3.15789	0.00158915	0.0256598	IL27RA	-15188
chr1_157219002_157219620	15.5316	1.14977	0.364299	3.15611	0.00159887	0.0257701	RP11-85G21.1	-12076
chr1_17467830_17468764	32.0491	0.673168	0.213508	3.15289	0.00161663	0.0260053	PADI2	-21900
chr1_158533670_158534824	29.9954	0.655071	0.207782	3.15269	0.00161776	0.0260053	OR6P1	-276
chr12_67277359_67278344	18.0398	1.21257	0.3846	3.15282	0.00161703	0.0260053	RP11-123O10.4	184599
chr3_12761438_12762086	14.5495	1.00905	0.320072	3.15256	0.00161846	0.0260053	TMEM40	48871
chr5_40490375_40490881	19.8934	0.978037	0.310326	3.15165	0.00162351	0.0260475	SNORA63	164184
chr9_127546767_127547289	13.5486	1.11123	0.352808	3.14968	0.00163447	0.0261765	OLFML2A	-7218
chr15_66108444_66109263	16.0604	0.993913	0.315619	3.1491	0.00163777	0.0262072	RAB11A	-23660
chr7_17048867_17049400	16.0276	0.936489	0.297409	3.14883	0.00163928	0.0262126	AGR3	-127256
chr9_120487515_120488264	30.7969	0.685744	0.218012	3.14544	0.00165838	0.0264231	snoZ13_snr52	5486
chr11_35293836_35294511	29.9941	0.695483	0.221176	3.14448	0.00166382	0.0264908	SLC1A2	147100
chr1_15050799_15051480	18.9593	0.977678	0.310974	3.14392	0.00166703	0.0265152	KAZN	-125600
chr6_119631609_119632313	20.4762	0.827243	0.26317	3.14338	0.00167008	0.026543	MAN1A1	38614
chr1_85312092_85313518	29.0289	0.690252	0.219691	3.14193	0.00167841	0.0266543	LPAR3	18325
chr12_49333759_49334404	17.935	0.871541	0.277414	3.14167	0.0016799	0.0266609	ARF3	16857
chr12_49333759_49334404.1	17.935	0.871541	0.277414	3.14167	0.0016799	0.0266609	RP11-302B13.5	16745
chr7_75490836_75491369	19.9308	0.9436	0.300588	3.13918	0.00169424	0.0268598	RHBDD2	17121
chr5_35828109_35828609	14.9627	1.1281	0.359441	3.13848	0.00169825	0.0268947	CTD-2113L7.1	-989
chr11_27489694_27490247	15.0049	0.972878	0.310025	3.13807	0.00170067	0.0269085	LGR4	3615
chr6_11552579_11552989	13.488	1.14375	0.364494	3.13792	0.00170154	0.0269085	TMEM170B	-14069
chr3_174048746_174049374	15.8888	0.97082	0.309413	3.13762	0.00170327	0.0269263	RN7SKP234	-273316
chr10_32236338_32237018	21.0163	0.912014	0.290703	3.13727	0.00170529	0.0269487	ARHGAP12	-18596
chr10_95195735_95197403	37.8221	0.678765	0.216534	3.13469	0.00172037	0.0271388	MYOF	44672
chr16_19201566_19202326	18.5637	0.97252	0.310271	3.13443	0.0017219	0.0271534	SYT17	-21985
chr5_177959674_177960716	31.5029	0.656542	0.209505	3.13378	0.00172569	0.0271938	COL23A1	29012
chr22_48653615_48654201	10.6016	1.21887	0.388973	3.13357	0.00172694	0.0271995	MIR3201	15975
chr1_203481916_203482606	21.2866	0.84059	0.268389	3.13199	0.00173629	0.0273028	OPTC	-18646
chr2_188033700_188034616	29.2509	0.684889	0.218747	3.13096	0.00174235	0.0273692	AC007319.1	-165754
chr11_123972334_123972978	19.0442	0.815222	0.260435	3.13023	0.00174668	0.0274274	VWA5A	13179
chr6_336466_337146	33.2506	0.630172	0.201392	3.12908	0.00175357	0.0275065	DUSP22	-44370
chr8_81776756_81777511	38.1557	0.667242	0.213276	3.12854	0.00175677	0.027547	ZNF704	9506
chr10_3137470_3138319	27.0527	0.787582	0.251751	3.12841	0.00175755	0.0275495	PFKP	-27759
chr4_87972195_87972805	11.7586	1.08468	0.346805	3.12764	0.00176215	0.0275828	AFF1	-115970
chr11_131927565_131928806	38.9046	0.603311	0.193118	3.12406	0.00178376	0.0278136	NTM	-687193
chr12_117323074_117323798	24.9935	0.699678	0.224089	3.12232	0.0017943	0.0279128	HRK	-3828
chr9_115981429_115982809	38.5738	0.675469	0.216333	3.12236	0.00179408	0.0279128	SLC31A1	1033
chr1_161135475_161136630	32.0478	0.586915	0.188071	3.1207	0.00180422	0.0280014	PPOX	0
chr1_161135475_161136630.1	32.0478	0.586915	0.188071	3.1207	0.00180422	0.0280014	USP21	-6207
chr12_52444317_52445347	31.4161	0.732938	0.234868	3.12064	0.00180462	0.0280014	NR4A1	0
chr5_76863840_76864406	16.5487	1.01965	0.326725	3.12083	0.00180342	0.0280014	OTP	71108
chr2_199778333_199778814	15.9485	1.03181	0.330943	3.11778	0.00182218	0.0282149	AC018717.1	157701
chr12_21768367_21768830	13.4753	1.178	0.377873	3.11745	0.00182422	0.0282367	GYS2	-10586
chr12_116581263_116581806	16.0915	1.05784	0.339454	3.1163	0.00183135	0.0283372	MED13L	133338
chr12_43091984_43092608	23.6097	0.785641	0.252235	3.11471	0.00184123	0.0284309	RP11-25I15.3	-5967
chr6_169512340_169513560	41.2008	0.593476	0.190577	3.11411	0.00184501	0.0284793	RP3-495K2.1	-44428
chr8_38225863_38226555	21.921	0.929653	0.298665	3.1127	0.00185387	0.0285962	WHSC1L1	13236
chr15_26836445_26837269	21.6797	0.881462	0.283199	3.11251	0.00185503	0.0286042	GABRB3	347418
chr2_210869300_210869774	13.4179	1.23288	0.396182	3.11191	0.00185883	0.0286231	RPE	-1935
chr22_45675677_45676116	10.1278	1.53302	0.492628	3.11193	0.00185871	0.0286231	UPK3A	4756
chr2_11003837_11004530	26.3464	0.726547	0.233679	3.10916	0.00187617	0.0288381	RP11-245G13.2	13865
chr10_12307426_12308129	18.5379	0.903642	0.290667	3.10886	0.00187812	0.0288441	RN7SL232P	-3757
chr11_62264692_62265745	21.5341	0.827389	0.266318	3.10677	0.00189141	0.0289745	AHNAK	19085
chr1_46285765_46286291	15.7288	0.995617	0.320737	3.10415	0.00190827	0.0291325	MAST2	-16481
chr12_82080474_82081107	16.3319	0.926609	0.298618	3.10299	0.00191574	0.0292165	PPFIA2	72003
chr3_41890383_41891131	19.6725	0.867748	0.279674	3.10272	0.00191753	0.0292221	U8	49615
chr8_126913561_126914053	22.1981	0.867577	0.279718	3.10161	0.00192472	0.0292808	RNU6-442P	-367
chr4_100776864_100777748	30.2431	0.699719	0.225647	3.10095	0.00192904	0.0293189	DAPP1	-38875
chr21_35940127_35941416	26.0866	0.693223	0.223705	3.09882	0.00194292	0.0294816	RCAN1	-40979
chr6_162520713_162521105	14.0344	1.07107	0.345732	3.09797	0.00194852	0.0295415	PARK2	627699
chr11_73495236_73495797	13.8407	1.17407	0.379077	3.09718	0.00195373	0.029585	MRPL48	3143
chr13_28824428_28826191	35.0578	0.598457	0.193234	3.09706	0.00195452	0.029585	PAN3	-111786
chr2_38404998_38406598	41.2993	0.599392	0.193593	3.09614	0.00196058	0.0296565	CYP1B1-AS1	-102208
chr18_56604371_56605123	20.7601	0.920136	0.297219	3.09582	0.00196272	0.0296788	ZNF532	-74540
chr15_86166738_86168163	35.0712	0.61471	0.19875	3.09288	0.00198222	0.0299026	AKAP13	-242868
chr15_86166738_86168163.1	35.0712	0.61471	0.19875	3.09288	0.00198222	0.0299026	RP11-815J21.3	2758
chr15_86166738_86168163.2	35.0712	0.61471	0.19875	3.09288	0.00198222	0.0299026	RP11-815J21.4	46017
chr1_198891783_198892760	27.0777	0.822511	0.265977	3.09241	0.00198539	0.0299402	RP11-16L9.2	59993
chr3_72987599_72988154	18.6495	0.884706	0.28626	3.09056	0.00199777	0.0300843	GXYLT2	-50376
chr9_126311165_126312080	29.0899	0.697479	0.225686	3.09048	0.00199832	0.0300843	DENND1A	380352
chr12_6276535_6277713	35.4826	0.643308	0.208214	3.08964	0.00200396	0.0301129	RP3-454B23.1	-6650
chr17_29378806_29379850	30.525	0.696207	0.225338	3.08962	0.00200414	0.0301129	RP11-271K11.5	-4068
chr2_189802042_189802394	10.2454	1.25749	0.407014	3.08955	0.00200458	0.0301129	COL3A1	36652
chr6_109195881_109196555	21.3758	0.820238	0.265526	3.08911	0.00200758	0.0301422	ARMC2	-26257
chr14_81593711_81594596	29.8595	0.668754	0.216638	3.08696	0.00202212	0.0303093	RP11-114N19.3	42163
chr14_81593711_81594596.1	29.8595	0.668754	0.216638	3.08696	0.00202212	0.0303093	TSHR	-172379
chr1_84899178_84899717	13.655	1.16283	0.376789	3.08615	0.00202766	0.0303617	DNASE2B	-34964
chr20_52509523_52510399	30.9692	0.669374	0.216977	3.08499	0.00203559	0.0304535	AC005220.3	46300
chr14_92961328_92961962	21.3398	0.863865	0.280078	3.08438	0.0020398	0.0304615	SLC24A4	-172404
chr17_30846343_30846835	13.4078	1.12706	0.365382	3.08461	0.00203822	0.0304615	MYO1D	357328
chr17_30846343_30846835.1	13.4078	1.12706	0.365382	3.08461	0.00203822	0.0304615	RP11-466A19.3	-373
chr17_30846343_30846835.2	13.4078	1.12706	0.365382	3.08461	0.00203822	0.0304615	RP11-466A19.6	0
chr17_30846343_30846835.3	13.4078	1.12706	0.365382	3.08461	0.00203822	0.0304615	RP11-466A19.8	3608
chr7_82777941_82779151	30.8573	0.726384	0.235548	3.08381	0.00204368	0.0305046	PCLO	13096
chr19_51638176_51638677	22.8805	0.806456	0.261598	3.08281	0.00205059	0.0305406	SIGLEC9	-10012
chr3_39302319_39302882	23.2399	0.753558	0.244689	3.07966	0.0020724	0.0307832	CX3CR1	19883
chr18_60482396_60483154	24.4986	0.692203	0.224782	3.07944	0.00207392	0.0307951	PHLPP1	-99714
chr5_149063817_149064180	10.155	1.28287	0.416659	3.07895	0.00207731	0.030815	U3	11343
chr12_90154485_90154959	14.6915	1.00512	0.326493	3.07854	0.00208016	0.0308366	RNU6-148P	-6650
chr2_160469201_160470645	31.7028	0.688473	0.223677	3.07797	0.00208414	0.0308798	BAZ2B	2559
chr21_16531772_16532428	21.0375	0.831003	0.269988	3.07793	0.00208446	0.0308798	AF127577.12	-92382
chr3_46994677_46995641	28.85	0.68736	0.223474	3.07579	0.00209947	0.0310608	CCDC12	27832
chr3_172035602_172036259	18.0121	0.958247	0.311626	3.07499	0.00210507	0.0311333	AC092964.1	-1385
chr3_172035602_172036259.1	18.0121	0.958247	0.311626	3.07499	0.00210507	0.0311333	FNDC3B	-278185
chr1_212661867_212662432	14.6404	1.11712	0.363574	3.07261	0.00212195	0.0312845	RP11-61J19.2	-20782
chr5_68006983_68007799	21.6943	0.797519	0.259752	3.07031	0.00213839	0.0315006	U8	161982
chr1_242309994_242310786	27.7216	0.7325	0.238648	3.06938	0.00214506	0.0315727	PLD5	377035
chr8_105907959_105908564	18.5223	0.987122	0.321708	3.06838	0.00215222	0.0316414	AC012564.1	-140556
chr1_149759172_149760000	14.3282	0.940046	0.306469	3.06734	0.00215971	0.0317202	FCGR1A	-4927
chr1_149759172_149760000.1	14.3282	0.940046	0.306469	3.06734	0.00215971	0.0317202	RP11-196G18.21	23313
chr1_149759172_149760000.2	14.3282	0.940046	0.306469	3.06734	0.00215971	0.0317202	RP11-196G18.3	4577
chr16_23866228_23866753	13.0841	1.02451	0.334091	3.06657	0.00216532	0.0317815	CHP2	-100281
chr1_76719865_76720311	11.8492	1.16436	0.379957	3.06445	0.00218074	0.0319657	ST6GALNAC3	-179462
chr15_42802970_42803698	18.7851	0.953361	0.311168	3.06382	0.00218532	0.0320117	SNAP23	-15139
chr20_46239267_46239894	15.9029	0.956836	0.312328	3.06356	0.00218718	0.0320286	NCOA3	-108622
chr10_64305065_64306040	26.3458	0.802121	0.261835	3.06346	0.00218793	0.032029	ZNF365	-171115
chr18_72045064_72045898	27.354	0.696543	0.227453	3.06236	0.002196	0.0320973	RP11-231E4.2	30785
chr19_8449399_8450400	22.808	0.831833	0.271607	3.06263	0.002194	0.0320973	RAB11B-AS1	5170
chr3_10230986_10231604	20.8232	0.771862	0.252055	3.06228	0.00219658	0.0320973	IRAK2	-24438
chr3_185870430_185871443	26.9647	0.707619	0.231078	3.06226	0.00219674	0.0320973	DGKG	208584
chr3_189111300_189111910	15.5675	1.01365	0.33101	3.06229	0.00219651	0.0320973	TPRG1-AS2	-152917
chr17_43154881_43155644	23.9605	0.75073	0.24538	3.05946	0.00221738	0.0322823	NMT1	-25904
chr19_48140484_48141341	34.4056	0.609135	0.199169	3.05839	0.00222531	0.032353	CTD-2571L23.8	-29704
chr19_48140484_48141341.1	34.4056	0.609135	0.199169	3.05839	0.00222531	0.032353	GLTSCR1	-29032
chr22_38927801_38928320	15.2212	1.0705	0.350183	3.05697	0.00223585	0.0324741	DMC1	37972
chr17_10053295_10053846	19.4698	0.916618	0.299961	3.05579	0.0022447	0.0325746	GAS7	48023
chr19_16510112_16510762	24.5158	0.793542	0.259748	3.05505	0.00225025	0.0326194	EPS15L1	72135
chr2_40709386_40710162	29.1398	0.624033	0.20429	3.05464	0.00225332	0.0326422	SLC8A1	128032
chr3_172344622_172345661	24.0378	0.730918	0.23944	3.05262	0.00226855	0.0327886	AC007919.2	15822
chr1_219318147_219318409	10.377	1.33318	0.436778	3.05229	0.002271	0.0327931	RP11-135J2.4	28895
chr11_12236542_12237086	13.7391	0.909607	0.298037	3.05199	0.00227327	0.0327931	MICAL2	-19051
chr8_17773479_17774173	31.1924	0.652759	0.213908	3.05159	0.00227634	0.0328082	FGL1	-5605
chr5_142182860_142183393	16.1248	0.923154	0.302665	3.05008	0.00228779	0.0329597	ARHGAP26	-32912
chr4_88939409_88940109	20.2709	0.793129	0.260138	3.04888	0.00229696	0.0330648	RNU1-36P	-18021
chr4_82413013_82413596	20.5715	0.849434	0.27875	3.04729	0.00230911	0.0332132	RASGEF1B	-19944
chr7_75300217_75300645	10.8421	1.25301	0.41142	3.04557	0.00232236	0.0333714	HIP1	67615
chr11_68713891_68714437	10.6736	1.02799	0.33755	3.04543	0.0023235	0.033377	RP11-757G1.5	-3571
chr5_121744599_121745134	16.5473	0.996183	0.327233	3.04426	0.00233252	0.033466	SNCAIP	-96698
chr5_125212737_125213420	18.1582	0.860093	0.282528	3.04427	0.00233246	0.033466	CTC-339D2.1	301850
chr17_8825718_8826650	31.4895	0.621977	0.204347	3.04373	0.00233662	0.0335114	PIK3R5	42375
chr6_111895488_111897300	32.7265	0.642504	0.211217	3.04191	0.00235083	0.0336501	TRAF3IP2-AS1	-90775
chr6_139629531_139630017	12.6585	1.15646	0.380233	3.04146	0.00235438	0.0336792	TXLNB	-16255
chr1_11911188_11912230	32.0112	0.592	0.194826	3.03861	0.0023767	0.0339223	NPPA	-2786
chr6_148704726_148705807	24.8457	0.789842	0.259932	3.03864	0.00237645	0.0339223	SASH1	-111287
chr20_18493815_18494184	11.0099	1.24003	0.408105	3.0385	0.00237761	0.0339243	SEC23B	-5617
chr10_114853297_114854418	34.3675	0.633829	0.208665	3.03755	0.0023851	0.0339986	TCF7L2	-143087
chr2_145402753_145403560	27.6268	0.722449	0.237858	3.03731	0.00238701	0.0340149	TEX41	21992
chr9_132258207_132259322	26.676	0.658565	0.216836	3.03716	0.00238815	0.0340203	LINC00963	-6829
chr4_7962427_7963054	21.4367	0.888398	0.292569	3.03654	0.00239308	0.0340795	AC097381.1	-21700
chr8_141369913_141370571	29.3588	0.728488	0.240019	3.03512	0.00240437	0.0342131	TRAPPC9	98108
chr17_14254864_14255809	25.785	0.797697	0.262845	3.03486	0.00240648	0.0342266	AC022816.2	21647
chr15_93583622_93584095	12.3285	1.05371	0.347214	3.03476	0.00240728	0.0342271	RGMA	32798
chr13_111934039_111934767	28.4115	0.686734	0.22631	3.03448	0.00240952	0.034248	ARHGEF7	-167074
chr6_10643217_10643902	19.6968	0.860997	0.283813	3.03368	0.00241594	0.0343063	GCNT6	-9225
chr2_212896735_212897754	19.0444	0.914113	0.301339	3.0335	0.00241736	0.0343156	ERBB4	505812
chr15_72598500_72599059	11.9942	1.05242	0.346969	3.03319	0.00241981	0.0343284	CELF6	0
chr15_72598500_72599059.1	11.9942	1.05242	0.346969	3.03319	0.00241981	0.0343284	RP11-106M3.2	69264
chr15_72598500_72599059.2	11.9942	1.05242	0.346969	3.03319	0.00241981	0.0343284	RP11-106M3.3	-27293
chr10_104533670_104534180	13.2155	0.995333	0.32829	3.03187	0.00243047	0.0344357	WBP1L	1826
chr8_133772496_133773183	30.536	0.69616	0.229673	3.0311	0.00243668	0.0345018	TMEM71	0
chr12_69180798_69181652	24.7358	0.800143	0.264016	3.03066	0.0024402	0.0345297	SLC35E3	-40913
chr17_34430721_34431453	20.7282	0.83763	0.276507	3.02932	0.00245102	0.0346326	CCL4	0
chr14_72943264_72944179	33.7432	0.657644	0.217104	3.02916	0.00245234	0.0346354	RGS6	-511756
chr5_147300324_147301151	21.4381	0.829427	0.27386	3.02865	0.00245645	0.0346715	C5orf46	-14223
chr1_119682620_119683869	41.1309	0.586244	0.193588	3.02831	0.00245929	0.0346753	RP11-418J17.1	0
chr1_119682620_119683869.1	41.1309	0.586244	0.193588	3.02831	0.00245929	0.0346753	WARS2	0
chr1_12805191_12806286	18.6455	0.847736	0.279984	3.0278	0.00246343	0.034687	C1orf158	0
chr4_40606875_40607309	10.5097	1.04894	0.346441	3.02776	0.0024637	0.034687	RBM47	25332
chr11_33287973_33288641	16.1259	0.946391	0.312944	3.02415	0.00249331	0.0350362	HIPK3	-9756
chr7_158364933_158366548	37.0632	0.627659	0.207568	3.02387	0.0024956	0.0350574	PTPRN2	13933
chr17_27252898_27253622	23.3962	0.874433	0.289229	3.02333	0.00250011	0.0350985	PHF12	25168
chr17_27252898_27253622.1	23.3962	0.874433	0.289229	3.02333	0.00250011	0.0350985	RP11-20B24.5	0
chr1_234792451_234793371	32.482	0.704759	0.233155	3.0227	0.0025053	0.0351492	RP4-781K5.4	-10417
chr7_35420169_35420923	27.0511	0.642201	0.212629	3.02029	0.00252532	0.035419	AC009531.2	-120829
chr21_18242232_18243040	19.6964	0.903663	0.2996	3.01624	0.00255934	0.0357978	AF212831.2	2972
chr6_14122021_14122853	24.3504	0.776617	0.25765	3.01423	0.00257634	0.0359531	CD83	-4150
chr17_17615739_17616414	16.8716	0.972278	0.322587	3.014	0.00257828	0.0359579	RAI1	-30953
chr10_17514865_17515862	20.807	0.795555	0.264077	3.01259	0.00259033	0.0360806	ST8SIA6	-18536
chr3_71084531_71084980	11.0146	1.23434	0.409716	3.01268	0.00258956	0.0360806	FOXP1	547925
chr9_97567511_97569078	33.2995	0.600593	0.199402	3.01197	0.00259561	0.0361315	C9orf3	-78529
chr2_38055981_38056905	25.8324	0.687326	0.228243	3.01138	0.00260063	0.0361675	LINC00211	0
chr15_76298390_76299178	22.065	0.792961	0.263369	3.01083	0.00260533	0.0362137	NRG4	50418
chr17_12612285_12612805	13.6313	1.14013	0.378681	3.0108	0.00260558	0.0362137	MYOCD	-42980
chr20_35671857_35673057	30.3573	0.717996	0.238483	3.01069	0.00260659	0.0362165	RBL1	51342
chr15_57612797_57613395	13.7399	1.07829	0.358374	3.00884	0.00262247	0.0363577	RP11-358M11.3	-1462
chr9_111341856_111342645	24.4569	0.745914	0.247901	3.00892	0.00262176	0.0363577	RP11-339N8.1	122728
chr17_71138928_71139662	29.5251	0.637124	0.211929	3.00631	0.00264438	0.0365476	RP11-143K11.5	21454
chr19_55275535_55276179	29.1565	0.674879	0.224673	3.00382	0.0026661	0.036788	CTB-61M7.1	-39535
chr8_58353821_58354365	26.3737	0.789421	0.262832	3.00352	0.0026688	0.0368051	RP11-246K15.1	51078
chr6_4901662_4902170	14.3875	1.15634	0.385015	3.00337	0.00267012	0.0368119	CDYL	-195270
chr2_158276938_158278067	32.8512	0.670023	0.22312	3.00298	0.00267353	0.0368476	CYTIP	67407
chr17_26620780_26621518	18.8747	0.814443	0.271247	3.00258	0.00267699	0.0368478	KRT18P55	12891
chr5_81205439_81206041	19.3917	0.793315	0.264208	3.00262	0.00267667	0.0368478	CTD-2249K22.1	-58020
chr7_98270858_98271804	27.4277	0.636404	0.211958	3.0025	0.00267769	0.0368478	NPTX2	-24250
chr9_111647829_111648483	13.8387	1.02164	0.340281	3.00235	0.00267907	0.0368554	IKBKAP	47914
chr14_102770998_102771898	30.0227	0.588039	0.195879	3.00205	0.00268165	0.0368795	ZNF839	11816
chr7_157283030_157283745	28.7664	0.639049	0.21294	3.00107	0.0026903	0.0369712	AC006372.4	-24106
chr9_102253831_102254629	25.6025	0.730338	0.243364	3.00102	0.00269081	0.0369712	RP11-547C13.1	39349
chr8_125654058_125654675	26.5589	0.758191	0.252713	3.0002	0.00269799	0.0370356	MTSS1	85996
chr7_101596217_101597139	24.372	0.754264	0.25143	2.9999	0.00270067	0.0370609	CUX1	-40150
chr1_90022368_90023044	21.6227	0.733398	0.244563	2.99881	0.00271039	0.0371526	LRRC8B	-31907
chr18_68089222_68089808	20.9626	0.790647	0.263696	2.99832	0.0027147	0.0371846	RP11-41O4.2	-37395
chr7_17735698_17736546	21.2906	0.720105	0.240196	2.99799	0.00271767	0.0372139	AC006482.1	-16526
chr2_68594911_68596325	37.4733	0.679507	0.226683	2.99761	0.00272104	0.0372258	PLEK	-2607
chr22_40887949_40888788	28.3367	0.632461	0.21103	2.99702	0.0027263	0.0372633	MKL1	143908
chr10_3849384_3849876	14.5484	0.993515	0.331768	2.99461	0.00274798	0.0374882	KLF6	-21917
chr14_31669117_31669714	15.0535	0.961059	0.320938	2.99453	0.00274865	0.0374882	HECTD1	7297
chr8_7252364_7252814	18.4839	0.870758	0.291001	2.99228	0.002769	0.0377138	ZNF705G	-9284
chr8_120662018_120663509	36.1862	0.606569	0.202885	2.98971	0.00279241	0.037953	ENPP2	-56770
chr18_60495395_60496142	19.4774	1.01709	0.340228	2.98944	0.00279488	0.0379676	PHLPP1	-112713
chr1_159867932_159869065	19.6738	0.87502	0.292922	2.98722	0.00281531	0.0381985	CCDC19	889
chr10_6075760_6076332	18.8582	0.953938	0.319563	2.98514	0.00283451	0.0384122	IL2RA	27957
chr10_6075760_6076332.1	18.8582	0.953938	0.319563	2.98514	0.00283451	0.0384122	RP11-536K7.5	-7820
chr6_11460140_11460810	20.2367	0.906493	0.30366	2.98523	0.0028337	0.0384122	RP11-716O23.1	-42558
chr13_42330588_42330955	11.2158	1.28528	0.430815	2.98338	0.00285088	0.0385753	VWA8	204302
chr12_116602240_116602747	17.6876	0.951833	0.319264	2.98134	0.00286993	0.0387742	MED13L	112397
chr2_168554376_168554902	14.3569	1.03702	0.348006	2.97989	0.00288353	0.0389223	RNU7-148P	-66325
chr4_26076152_26076916	19.775	0.759673	0.254958	2.97959	0.00288631	0.0389455	SMIM20	-160222
chr22_19925837_19926252	10.4214	1.40078	0.471337	2.97193	0.00295938	0.0396695	TXNRD2	3082
chr2_64429464_64430003	13.131	1.0972	0.369376	2.97042	0.00297393	0.0397928	AC074289.1	-59092
chr2_64429464_64430003.1	13.131	1.0972	0.369376	2.97042	0.00297393	0.0397928	LINC00309	2617
chr9_109072995_109073501	16.2421	0.797762	0.268673	2.96927	0.00298508	0.0399299	RP11-308N19.1	-32323
chr3_40664941_40665577	24.6874	0.717106	0.241552	2.96874	0.00299023	0.0399508	RP11-528N21.1	-18023
chr8_90741272_90741772	23.6756	0.813676	0.274191	2.96755	0.00300181	0.0400814	RP11-37B2.1	28168
chr10_16623137_16623645	14.833	0.94184	0.3174	2.96736	0.00300373	0.0400951	C1QL3	-59133
chr8_33540568_33541042	17.3822	0.812252	0.273774	2.96687	0.00300847	0.0401463	RN7SL457P	32260
chr4_26152353_26152939	17.9452	0.821274	0.276909	2.96586	0.00301834	0.0402298	RBPJ	211119
chr13_111522432_111523101	22.4771	0.78925	0.266243	2.96439	0.00303279	0.0403982	LINC00346	-270
chr18_40200388_40201289	21.2065	0.909092	0.306842	2.96274	0.00304914	0.0406039	RNA5SP454	-349835
chr3_15419548_15420058	20.6848	0.760359	0.256889	2.95988	0.0030776	0.040946	SH3BP5	-36673
chr14_75741326_75742224	29.159	0.666044	0.225111	2.95873	0.00308905	0.0410606	FOS	3253
chr2_48584016_48584528	13.4438	1.0047	0.33965	2.95804	0.003096	0.0411037	FOXN2	-42168
chr4_62333520_62334244	21.1376	0.880363	0.2977	2.95721	0.00310434	0.0411867	LPHN3	-266545
chr9_98783076_98784194	22.5399	0.660424	0.223481	2.95516	0.00312504	0.041404	LINC00092	0
chr7_39992592_39993491	21.7135	0.816207	0.276234	2.95477	0.00312906	0.0414079	CDK13	-2957
chr7_130588387_130588881	12.8622	1.23102	0.416694	2.95426	0.00313419	0.0414636	AC016831.7	-49909
chr1_19278176_19278973	20.7721	0.753406	0.255039	2.95408	0.00313603	0.0414755	IFFO2	4208
chr13_41215079_41215561	13.4561	0.973911	0.329697	2.95395	0.0031373	0.04148	FOXO1	25174
chr8_32214694_32215235	18.4337	0.965724	0.327034	2.95298	0.00314727	0.0415748	NRG1	-717793
chr17_46929484_46930119	22.2254	0.846365	0.286663	2.95247	0.00315242	0.0416181	CALCOCO2	-21089
chr3_56792528_56793068	17.1865	0.792145	0.26837	2.95169	0.00316043	0.0417115	ARHGEF3	16528
chr11_16812588_16813656	26.0349	0.723673	0.245246	2.9508	0.0031695	0.0417816	PLEKHA7	222335
chr21_30580790_30581427	16.5541	1.00563	0.340808	2.95071	0.00317044	0.0417816	LINC00189	-14976
chr12_43611485_43612084	16.9749	1.01349	0.343546	2.95009	0.00317685	0.041829	RP11-118A3.1	-62368
chr10_69550581_69551122	16.909	0.863332	0.292712	2.94942	0.00318368	0.0419065	RNU6-1250P	17138
chr8_141603545_141604011	15.1384	0.964906	0.327164	2.94931	0.00318486	0.0419097	AGO2	41708
chr15_49612341_49613076	22.9522	0.764234	0.259292	2.94739	0.00320473	0.0421089	GALK2	-164380
chr10_63157069_63157813	19.7475	0.883148	0.299703	2.94674	0.00321143	0.0421656	RP11-809M12.1	54584
chr9_117720262_117721616	29.7104	0.644323	0.21866	2.9467	0.00321188	0.0421656	TNFSF8	-27565
chr9_20924274_20924972	19.6717	0.811839	0.275644	2.94525	0.00322695	0.042301	FOCAD	-265967
chr13_111180641_111181242	21.3375	0.858355	0.291457	2.94504	0.00322909	0.0423165	RAB20	32839
chr12_117571619_117572321	23.4574	0.723923	0.245896	2.94402	0.00323978	0.0424317	RP11-103B5.2	-34334
chr11_71673389_71674200	25.4259	0.714417	0.242723	2.94335	0.00324683	0.0424616	RNF121	-33310
chr12_110700500_110701081	12.9289	1.0786	0.366605	2.94213	0.00325963	0.0425914	ATP2A2	32715
chr2_160430705_160431474	16.8825	0.904718	0.307662	2.94062	0.00327554	0.0427215	BAZ2B	41730
chrX_39194760_39195553	16.469	0.85932	0.292304	2.93981	0.00328411	0.0427732	RP11-265P11.2	-8144
chr8_126132558_126133106	23.6904	0.773097	0.263119	2.93821	0.00330117	0.0429326	NSMCE2	-28464
chr6_148685159_148685774	15.0555	0.91857	0.313191	2.93294	0.00335774	0.0435031	SASH1	-91720
chr17_50224945_50225753	24.1385	0.738501	0.251816	2.9327	0.00336025	0.043513	CA10	11409
chr1_67899274_67900014	22.0268	0.76525	0.260947	2.93258	0.00336155	0.0435144	SERBP1	-3176
chr8_48504333_48504724	14.6147	1.08375	0.369662	2.93173	0.00337078	0.0435832	SPIDR	-330811
chr21_26874121_26874900	26.3716	0.666049	0.227427	2.92863	0.00340465	0.0438809	AP000221.1	15751
chr4_1328972_1331486	41.8029	0.588883	0.201179	2.92715	0.00342081	0.0440637	MAEA	-45298
chr7_144231218_144231860	18.4441	0.746798	0.255165	2.92673	0.00342546	0.044098	TPK1	301287
chr10_64440878_64441515	23.0085	0.702002	0.239931	2.92585	0.00343515	0.0441845	AC067751.1	-22934
chr11_47545044_47545843	19.237	0.952349	0.325609	2.92483	0.00344649	0.0442798	CELF1	28827
chr3_12367106_12367877	19.7499	0.84944	0.290417	2.92489	0.00344576	0.0442798	PPARG	-13220
chr4_56202272_56203290	25.1407	0.67484	0.230759	2.92444	0.00345073	0.0443209	SRD5A3	8986
chr20_17894132_17894472	10.6394	1.19737	0.409543	2.92368	0.0034592	0.0444041	RNU6-192P	-9727
chr7_127496758_127497300	20.2494	0.856609	0.293108	2.92251	0.00347225	0.0445203	SND1	-204525
chr8_74536886_74537734	27.1949	0.693376	0.237273	2.92227	0.00347489	0.0445284	STAU2	121390
chr15_89181767_89182350	20.464	0.843767	0.28885	2.92112	0.00348773	0.0446287	ISG20	-2384
chr2_188374733_188375469	17.1299	0.799416	0.273819	2.9195	0.00350591	0.044797	AC007319.1	-506787
chr2_188374733_188375469.1	17.1299	0.799416	0.273819	2.9195	0.00350591	0.044797	TFPI	43751
chr6_14596588_14597158	18.3351	0.941535	0.322566	2.91889	0.00351278	0.0448718	RP11-330A16.1	2764
chr5_95205413_95206591	28.9061	0.718003	0.246116	2.91734	0.00353033	0.0450414	AC008592.5	-7924
chr11_123941452_123942128	22.1993	0.759497	0.260403	2.91662	0.00353848	0.0451095	OR10G7	-31735
chr14_56579395_56579855	13.9899	0.975412	0.33473	2.91403	0.003568	0.0453949	PELI2	5238
chr2_135701120_135701663	15.2004	1.0113	0.347041	2.91407	0.00356749	0.0453949	CCNT2	-24726
chr3_113704364_113704862	11.79	0.971674	0.333443	2.91406	0.00356759	0.0453949	KIAA1407	70599
chr6_2733335_2733919	22.3089	0.842275	0.289137	2.91307	0.00357899	0.0455217	MYLK4	17282
chr9_132232681_132233183	10.747	1.04011	0.357162	2.91216	0.00358944	0.0455968	AL353803.1	7652
chr17_441816_442404	13.1247	1.17092	0.402766	2.90721	0.00364671	0.0461195	RP5-1029F21.4	-15437
chr17_441816_442404.1	13.1247	1.17092	0.402766	2.90721	0.00364671	0.0461195	VPS53	175693
chr2_59463699_59464893	33.6363	0.610824	0.210102	2.90727	0.00364595	0.0461195	AC007131.1	-18857
chr2_59463699_59464893.1	33.6363	0.610824	0.210102	2.90727	0.00364595	0.0461195	RP11-444A22.1	862443
chr6_115310675_115311402	23.2509	0.774536	0.266521	2.90609	0.00365974	0.0462317	RNU6-475P	-122535
chr3_18553361_18554078	24.0285	0.67916	0.233856	2.90419	0.00368209	0.0464219	AC144521.1	-66846
chrX_65269944_65270418	10.8019	1.1478	0.395244	2.90402	0.00368405	0.0464334	VSIG4	-9995
chr1_207999091_207999990	31.4604	0.647582	0.223055	2.90324	0.00369327	0.0465364	C1orf132	-23223
chrX_31154149_31154735	14.9952	0.973184	0.335362	2.90189	0.00370921	0.0466977	DMD	2202824
chr3_190284124_190284784	24.693	0.729835	0.251613	2.90063	0.00372416	0.0468594	IL1RAP	-52240
chr17_6699778_6700714	15.9544	0.963097	0.332344	2.89789	0.00375684	0.0471772	FBXO39	-20237
chr12_89556278_89557000	28.1948	0.689095	0.237828	2.89746	0.00376203	0.0472158	RP11-13A1.3	146331
chr5_163370472_163370929	10.3605	1.09215	0.377131	2.89595	0.00378013	0.0473761	RNU6-168P	-147301
chr5_110062267_110062803	15.3315	1.01055	0.349275	2.89329	0.00381235	0.0475923	TMEM232	0
chr1_185307833_185308706	28.9668	0.636568	0.220059	2.89272	0.00381926	0.0476386	GS1-279B7.1	-3694
chr16_9141572_9142220	19.2915	0.801367	0.277279	2.89011	0.00385108	0.0479281	RP11-473I1.6	20191
chr10_4386701_4387258	14.9321	0.926597	0.320718	2.88913	0.00386309	0.0480506	LINC00703	39180
chr22_47226492_47226958	12.5666	1.02122	0.353488	2.88897	0.00386506	0.0480617	TBC1D22A	-67975
chr15_91281899_91282354	14.2647	0.988988	0.342835	2.88474	0.00391742	0.0485635	BLM	-21275
chr14_31698567_31699316	27.0891	0.70117	0.243073	2.8846	0.00391906	0.0485704	RP11-596D21.1	18518
chr13_24848375_24849077	16.1514	0.998838	0.346372	2.88371	0.00393019	0.0486541	RP11-307N16.6	-294537
chr13_24848375_24849077.1	16.1514	0.998838	0.346372	2.88371	0.00393019	0.0486541	SPATA13	-294432
chr3_10215376_10216167	28.2864	0.719365	0.249513	2.88308	0.00393812	0.0487252	IRAK2	-8828
chr1_92295769_92296450	16.5456	0.858891	0.298204	2.88021	0.00397405	0.0490951	TGFBR3	75443
chr16_69429971_69430548	28.0545	0.725612	0.251934	2.88017	0.00397464	0.0490951	TERF2	-10080
chr4_76067602_76068475	24.4939	0.702866	0.244022	2.88034	0.00397251	0.0490951	RP11-44F21.4	-40916
chr8_80932756_80932995	10.7462	1.23709	0.429656	2.87927	0.00398602	0.0491812	MRPS28	9530
chr4_3371511_3372135	23.6822	0.712187	0.247394	2.87876	0.00399242	0.0492465	RGS12	-55638
chr14_36832943_36833359	13.1079	0.966674	0.335972	2.87724	0.00401169	0.0494084	DPPA3P2	7011
chr1_8343131_8343775	21.1931	0.832741	0.289571	2.87578	0.00403032	0.0495492	RN7SL729P	-7693
chr13_45827523_45828103	16.2872	0.888539	0.309019	2.87536	0.00403572	0.0495787	GTF2F2	-132874
chr6_161790271_161790783	15.9707	0.847684	0.294836	2.87511	0.00403888	0.0495881	PARK2	1358021
chr4_185455668_185456182	17.5684	0.814826	0.283487	2.8743	0.00404927	0.0496935	RP11-326I11.4	2527
chr11_14667408_14668279	24.0001	0.764349	0.265941	2.87413	0.00405137	0.0496982	PDE3B	-2140
chr1_62299329_62299938	13.0086	1.17025	0.407368	2.87272	0.00406955	0.0498113	INADL	-91181
chr19_14999315_14999988	24.516	0.761821	0.265185	2.87279	0.00406861	0.0498113	OR7A17	-7051
chr8_115032901_115033437	24.6774	0.687187	0.239219	2.87263	0.00407066	0.0498113	RP11-267L5.1	260865
chr12_111872678_111873104	14.1862	0.989983	0.34484	2.87085	0.0040937	0.0500657	SH2B3	-28927
chr10_103476584_103477241	16.1233	0.864633	0.301257	2.87008	0.00410362	0.0501357	RP11-190J1.3	-8426
chr19_14330453_14331299	25.6799	0.731575	0.254917	2.86985	0.0041066	0.0501546	RN7SL231P	-6590
chr17_9916574_9917424	20.1714	0.767521	0.267484	2.86941	0.00411239	0.0501999	GAS7	184445
chr5_168217791_168218304	12.8518	1.14527	0.399178	2.86906	0.00411688	0.050225	SLIT3	509830
chr18_8052175_8052593	10.8499	1.18524	0.413402	2.86704	0.00414331	0.0504921	PTPRM	-485396
chr17_14025188_14025702	14.3364	0.802127	0.279814	2.86665	0.00414846	0.0505386	COX10	-52376
chr2_198120028_198120670	24.0666	0.713285	0.248843	2.8664	0.00415166	0.0505386	ANKRD44	54842
chr2_198120028_198120670.1	24.0666	0.713285	0.248843	2.8664	0.00415166	0.0505386	ANKRD44-IT1	46574
chr3_150630842_150631343	10.952	0.926379	0.323281	2.86556	0.00416275	0.0506044	CLRN1-AS1	-60572
chr3_150630842_150631343.1	10.952	0.926379	0.323281	2.86556	0.00416275	0.0506044	RP11-166N6.2	-22420
chr3_150630842_150631343.2	10.952	0.926379	0.323281	2.86556	0.00416275	0.0506044	RP11-166N6.3	28188
chr1_173012016_173012829	19.3581	0.775345	0.270742	2.86378	0.0041862	0.0508201	RP1-15D23.2	-266972
chr1_173012016_173012829.1	19.3581	0.775345	0.270742	2.86378	0.0041862	0.0508201	TNFSF18	7275
chr8_52318531_52319052	21.7976	0.776179	0.271271	2.86127	0.00421946	0.0511123	PXDNL	402954
chr11_1592872_1594051	24.7255	0.70347	0.246028	2.85931	0.00424568	0.0513879	DUSP8	0
chr11_1592872_1594051.1	24.7255	0.70347	0.246028	2.85931	0.00424568	0.0513879	KRTAP5-AS1	-290
chr6_170110163_170110544	12.5285	1.11123	0.388651	2.85919	0.00424724	0.0513929	PHF10	13608
chr6_159107824_159108377	17.914	0.838809	0.293468	2.85826	0.00425973	0.051516	SYTL3	-36740
chr6_109242696_109243266	29.2066	0.78763	0.275594	2.85793	0.00426411	0.051555	ARMC2	-73072
chr3_101659415_101659862	12.8488	1.11371	0.389736	2.85761	0.00426843	0.0515642	RP11-221J22.1	0
chr3_148037064_148037779	20.8346	0.83415	0.292038	2.8563	0.00428604	0.0517358	RP11-501O2.5	-7131
chr17_75608136_75608614	12.6057	1.0945	0.383301	2.85544	0.00429767	0.0518059	RP11-13K12.5	-43359
chr9_126511808_126512365	17.9529	0.877651	0.307573	2.85347	0.00432444	0.0521005	DENND1A	180067
chr9_126511808_126512365.1	17.9529	0.877651	0.307573	2.85347	0.00432444	0.0521005	RP11-417B4.2	-13093
chr10_70807739_70808474	22.1667	0.712658	0.249783	2.85312	0.00432929	0.0521129	SRGN	39388
chr2_30925527_30926165	13.9429	0.889975	0.311989	2.85259	0.00433651	0.0521342	CAPN13	117244
chr16_87441103_87441613	17.6559	0.995154	0.348906	2.85221	0.00434161	0.0521694	ZCCHC14	84039
chr17_46560648_46561363	19.3923	0.836881	0.293471	2.85166	0.00434914	0.0522425	RP11-433M22.2	-22917
chr4_54542598_54543009	12.4813	1.09897	0.38584	2.84826	0.00439593	0.0526341	FIP1L1	-298787
chr2_97199050_97199749	21.9457	0.705537	0.247749	2.8478	0.00440232	0.0526681	RP11-363D14.1	-1007
chr5_111264170_111264682	16.2092	0.92655	0.325453	2.84696	0.00441389	0.052764	NREP	68480
chr5_111264170_111264682.1	16.2092	0.92655	0.325453	2.84696	0.00441389	0.052764	NREP-AS1	-15966
chr6_20564876_20565896	21.9538	0.898741	0.31568	2.847	0.00441337	0.052764	CDKAL1	-18305
chr11_35168167_35168611	15.1854	1.12294	0.394471	2.84669	0.00441764	0.0527805	CD44	-7317
chr3_150607048_150608525	34.2049	0.593537	0.208498	2.84673	0.00441705	0.0527805	CLRN1-AS1	-36778
chr3_150607048_150608525.1	34.2049	0.593537	0.208498	2.84673	0.00441705	0.0527805	FAM188B2	3565
chr3_150607048_150608525.2	34.2049	0.593537	0.208498	2.84673	0.00441705	0.0527805	RP11-166N6.2	0
chr3_150607048_150608525.3	34.2049	0.593537	0.208498	2.84673	0.00441705	0.0527805	RP11-166N6.3	51006
chr2_204514537_204515314	21.4227	0.784955	0.275815	2.84595	0.00442795	0.0528611	CD28	55933
chr3_99536222_99537129	39.2022	0.696012	0.244579	2.84576	0.00443053	0.0528778	CMSS1	0
chr1_88109880_88110995	22.3649	0.763446	0.268477	2.84362	0.00446047	0.0531597	RNA5SP52	-190824
chr1_203371712_203372138	14.7513	1.03759	0.364897	2.84353	0.00446168	0.0531597	FMOD	-51095
chr19_4759657_4760225	20.9084	0.675984	0.237732	2.84347	0.00446252	0.0531597	MIR7-3HG	8927
chr17_74137126_74137621	14.0362	0.849849	0.298891	2.84334	0.00446428	0.0531666	FOXJ1	0
chr17_74137126_74137621.1	14.0362	0.849849	0.298891	2.84334	0.00446428	0.0531666	RNF157-AS1	-490
chr2_127984201_127984777	15.6805	0.948448	0.333608	2.843	0.00446905	0.0531948	CYP27C1	-6547
chr3_41722753_41723393	21.9864	0.714048	0.251242	2.84207	0.0044822	0.0533371	SCARNA21	6133
chr3_171568471_171569876	32.5945	0.690888	0.243103	2.84196	0.00448377	0.0533415	TMEM212	-7333
chr9_98778045_98778760	19.4678	0.812813	0.286089	2.84111	0.00449563	0.0534557	LINC00092	5283
chr16_72821233_72821763	14.8234	0.908629	0.319848	2.84082	0.00449984	0.0534784	AC004943.1	0
chr16_72821233_72821763.1	14.8234	0.908629	0.319848	2.84082	0.00449984	0.0534784	ZFHX3	271835
chr4_184079080_184079632	17.1634	0.865509	0.304847	2.83916	0.00452322	0.0536674	RNU7-158P	10939
chr6_46738616_46739141	19.7037	0.759328	0.267458	2.83906	0.00452472	0.0536709	RP11-268F1.3	-9721
chr13_80742130_80742998	25.9278	0.719182	0.253428	2.83782	0.00454231	0.0538048	SPRY2	172089
chr2_42949496_42950108	20.2405	0.731519	0.258102	2.83422	0.0045937	0.0542722	MTA3	-227788
chr15_41507834_41508379	15.8394	0.823323	0.290572	2.83345	0.00460484	0.0543895	EXD1	14517
chr7_17162306_17163115	27.1574	0.723332	0.255341	2.83281	0.0046141	0.054441	AHR	175131
chr7_100660380_100661230	13.5691	0.94401	0.333313	2.8322	0.00462283	0.0544951	MUC12	-47477
chr7_100660380_100661230.1	13.5691	0.94401	0.333313	2.8322	0.00462283	0.0544951	RP11-395B7.4	0
chr6_161529454_161530455	26.9992	0.69701	0.246169	2.83143	0.00463408	0.0546044	MAP3K4	-116696
chr2_68668809_68669295	16.6691	0.933097	0.329563	2.83132	0.0046357	0.0546049	FBXO48	25096
chr5_40025550_40026146	14.7677	1.03893	0.367244	2.82898	0.00466972	0.0548935	LINC00603	26247
chr8_81993677_81993997	12.2541	1.16907	0.413422	2.82779	0.00468699	0.055053	PAG1	30307
chr7_89874271_89874753	11.8402	0.960927	0.339828	2.82769	0.00468857	0.0550543	C7orf63	0
chr10_16949595_16950034	14.129	1.02592	0.362882	2.82715	0.00469649	0.0551209	CUBN	221797
chr1_120930133_120931040	17.438	0.778549	0.275444	2.82653	0.00470559	0.0551986	FCGR1B	4898
chr1_120930133_120931040.1	17.438	0.778549	0.275444	2.82653	0.00470559	0.0551986	RP11-439A17.10	-23525
chr1_120930133_120931040.2	17.438	0.778549	0.275444	2.82653	0.00470559	0.0551986	RP11-439A17.9	-4500
chr12_54776743_54777392	21.8949	0.734043	0.259788	2.82555	0.00472003	0.0553096	RP11-753H16.3	-29299
chr12_54776743_54777392.1	21.8949	0.734043	0.259788	2.82555	0.00472003	0.0553096	RP11-753H16.5	-29168
chr12_54776743_54777392.2	21.8949	0.734043	0.259788	2.82555	0.00472003	0.0553096	ZNF385A	7691
chr10_93661224_93662259	27.6042	0.725291	0.256726	2.82516	0.0047257	0.0553325	RP11-402D21.2	5629
chr2_216545630_216546239	22.1351	0.805273	0.285035	2.82518	0.00472546	0.0553325	AC012668.2	-134710
chr2_216545630_216546239.1	22.1351	0.805273	0.285035	2.82518	0.00472546	0.0553325	LINC00607	162021
chr13_31151475_31152022	17.365	0.923564	0.326999	2.82436	0.00473748	0.0554365	HMGB1	39713
chr7_68428719_68429346	15.1712	0.954888	0.338191	2.82352	0.00474995	0.0555434	RP11-123O1.1	75793
chr15_69807801_69808565	19.3673	0.745465	0.264093	2.82274	0.00476148	0.0556052	RP11-279F6.1	-47427
chr5_110847928_110848832	25.6083	0.718967	0.254699	2.82281	0.00476053	0.0556052	STARD4	0
chr5_110847928_110848832.1	25.6083	0.718967	0.254699	2.82281	0.00476053	0.0556052	STARD4-AS1	-5
chr10_94457586_94458124	15.3295	1.09069	0.386432	2.82247	0.00476553	0.0556378	HHEX	-6744
chr8_74903364_74904114	33.9676	0.624804	0.221394	2.82214	0.00477039	0.05568	LY96	0
chr8_42012468_42013385	31.3931	0.694308	0.246123	2.82098	0.00478775	0.055824	AP3M2	-2005
chr1_10313758_10314175	10.5304	1.07005	0.379344	2.82078	0.00479066	0.0558287	KIF1B	-21451
chr4_187713983_187714594	14.7923	0.841188	0.298237	2.82054	0.00479433	0.0558395	AC108865.1	64017
chr3_20089329_20089934	17.151	0.886313	0.314259	2.82033	0.00479749	0.0558499	KAT2B	-7815
chr12_89549762_89551106	31.1148	0.661775	0.234702	2.81964	0.0048077	0.0558956	RP11-13A1.3	152225
chr12_108440800_108441402	21.2438	0.771962	0.273772	2.81972	0.00480651	0.0558956	WSCD2	81846
chr10_131514217_131514872	12.6176	0.983232	0.348791	2.81897	0.0048178	0.0559838	MGMT	-248770
chr12_102576359_102576843	17.1402	0.853771	0.30295	2.81819	0.00482945	0.0560753	PARPBP	-62397
chr22_22044555_22045154	17.1027	0.874167	0.310222	2.81788	0.00483418	0.0561009	PPIL2	-24258
chr3_146224230_146224816	20.337	0.807552	0.286982	2.81394	0.0048938	0.0566894	PLSCR2	-37142
chr5_36372759_36374156	33.0466	0.607658	0.216001	2.81322	0.00490478	0.056782	RANBP3L	-70755
chr11_116203465_116204248	22.5083	0.719866	0.255954	2.81249	0.00491602	0.0568285	snoU13	-12405
chr14_23091982_23092578	16.4161	0.929344	0.33043	2.81253	0.00491536	0.0568285	OR6J1	11139
chr9_90407728_90408653	23.7393	0.707596	0.251648	2.81184	0.00492583	0.0568963	CTSL3P	-19899
chr20_6006668_6007091	10.865	1.23134	0.43805	2.81096	0.00493935	0.0570094	CRLS1	-19933
chr10_60042339_60042910	17.1413	0.901703	0.320929	2.80966	0.00495935	0.0571727	CISD1	-13522
chr4_177926806_177927378	18.1002	0.878397	0.312651	2.80951	0.00496163	0.0571775	RP11-765K14.1	-129951
chr10_21589370_21589850	14.0704	0.924025	0.329057	2.8081	0.00498347	0.0573401	RNU6-15P	21040
chr3_56191468_56192248	27.0721	0.64214	0.228778	2.80682	0.00500328	0.0575086	ERC2	310144
chr10_16812583_16813222	17.2714	0.834511	0.297345	2.80654	0.00500761	0.0575422	RSU1	46306
chr11_10912765_10913200	11.4001	0.974574	0.34731	2.80606	0.0050151	0.0575999	ZBED5-AS1	-32960
chr3_37095577_37097012	34.7593	0.623644	0.222256	2.80597	0.00501655	0.0576017	LRRFIP2	119669
chr12_111868567_111869079	12.6896	1.01973	0.363741	2.80345	0.00505596	0.0579645	SH2B3	-24816
chr6_100791210_100792061	24.1995	0.839522	0.299562	2.80249	0.00507092	0.0580762	RP1-121G13.2	82933
chr12_68761670_68762138	11.2322	1.07608	0.384106	2.80151	0.00508634	0.0582078	RP11-71J4.2	-23227
chr1_183961999_183962691	19.6858	0.843016	0.301016	2.80057	0.00510121	0.0583031	COLGALT2	44173
chr7_12624439_12625064	20.7367	0.765087	0.273201	2.80045	0.00510308	0.0583095	SCIN	-14128
chr22_35932141_35932926	20.7577	0.80456	0.287332	2.80011	0.00510851	0.0583184	RASD2	3989
chr19_50507090_50507714	25.7718	0.706812	0.252436	2.79996	0.0051109	0.058324	VRK3	21490
chr7_29369198_29369717	14.4158	1.2695	0.453557	2.79898	0.00512646	0.0584772	AC004593.3	-120612
chr8_95604747_95605110	14.121	1.12426	0.401671	2.79895	0.00512695	0.0584772	RP11-267M23.4	-38798
chr12_17492014_17492439	14.106	1.01163	0.361539	2.79812	0.00514003	0.0585586	RP11-606D9.1	249752
chr13_23059646_23060250	16.0451	0.879662	0.31441	2.79782	0.00514491	0.058585	SNORD36	317034
chr3_119378098_119378959	18.8217	0.799906	0.285908	2.79777	0.00514561	0.058585	POPDC2	772
chr14_93657178_93657758	15.0849	0.935832	0.334556	2.79724	0.00515418	0.0586525	RP11-371E8.4	-5860
chr19_17561058_17561746	30.6867	0.69437	0.248268	2.79686	0.00516026	0.0587067	CTD-2521M24.10	9868
chr8_130430719_130431319	28.9577	0.631882	0.225955	2.7965	0.005166	0.058742	CCDC26	261167
chr8_130430719_130431319.1	28.9577	0.631882	0.225955	2.7965	0.005166	0.058742	RP11-26E5.1	-2525
chr12_109085239_109085920	28.3938	0.709646	0.253815	2.79592	0.00517529	0.0588326	CORO1C	39453
chr2_160434455_160435193	14.4278	0.921483	0.329679	2.79509	0.00518852	0.0588928	BAZ2B	38011
chr13_30307081_30307711	21.5131	0.772352	0.276346	2.79488	0.00519197	0.0589169	UBL3	117111
chr14_68677287_68678329	33.3496	0.618675	0.221394	2.79445	0.00519879	0.0589342	RAD51B	-390792
chr3_98505311_98506397	31.9893	0.639656	0.228917	2.79428	0.00520159	0.0589359	ST3GAL6	-54213
chr5_148869020_148870374	24.6174	0.748934	0.26806	2.79391	0.00520756	0.0589721	CTB-89H12.4	10443
chr8_116230898_116231644	29.5416	0.601651	0.215395	2.79324	0.00521822	0.0590042	AF178030.2	290185
chr20_56881555_56882402	26.9501	0.720722	0.25807	2.79274	0.00522633	0.0590359	PPP4R1L	2094
chr7_75638237_75638992	23.5299	0.721285	0.258268	2.79277	0.00522582	0.0590359	STYXL1	38307
chr9_94257208_94258224	16.0009	0.953019	0.341232	2.79288	0.00522419	0.0590359	RP11-440G5.2	-68689
chr4_40684859_40686230	35.4042	0.589027	0.211011	2.79146	0.00524713	0.0592176	RBM47	-52219
chr1_225900014_225900567	18.8441	0.78463	0.281134	2.79094	0.0052555	0.0592462	RP11-145A3.1	-11709
chr1_225900014_225900567.1	18.8441	0.78463	0.281134	2.79094	0.0052555	0.0592462	RP11-145A3.2	23410
chr9_130840473_130841519	25.2823	0.706985	0.253315	2.79094	0.00525559	0.0592462	SLC25A25	-9994
chr2_227304114_227304516	14.7003	0.944226	0.338461	2.78976	0.00527467	0.0594161	MIR5702	218994
chr15_86245493_86246855	24.9769	0.677113	0.242761	2.78922	0.00528359	0.0594847	AKAP13	-321623
chr15_86245493_86246855.1	24.9769	0.677113	0.242761	2.78922	0.00528359	0.0594847	RP11-815J21.1	-1154
chr4_77011387_77011789	17.6501	0.895084	0.321006	2.78837	0.00529741	0.0595668	ART3	-79035
chr1_169877788_169878289	13.5032	1.00276	0.35978	2.78713	0.00531766	0.059719	SCYL3	-14695
chr6_168227669_168228606	11.7582	0.885253	0.317701	2.78643	0.0053292	0.0598182	MLLT4	-29
chr6_169692155_169693145	38.2785	0.589249	0.211477	2.78635	0.00533052	0.0598182	XXyac-YX65C7_A.3	-4584
chr9_104340577_104341106	18.7813	0.848388	0.304494	2.78622	0.00533266	0.0598272	GRIN3A	159757
chr1_111188591_111188971	11.9494	1.09098	0.39175	2.78489	0.00535451	0.0600269	AL365361.1	6683
chr12_20008863_20009722	18.8559	0.792981	0.284759	2.78474	0.00535698	0.0600395	RP11-405A12.2	-80479
chr19_41008795_41009670	11.4373	0.947258	0.340279	2.78377	0.00537312	0.0601597	SPTBN4	-36648
chr10_60422122_60422646	11.3386	1.04523	0.37562	2.78267	0.0053914	0.0602802	BICC1	-149223
chr20_47307358_47308058	25.3968	0.663302	0.238386	2.78247	0.00539471	0.0602802	PREX1	136363
chr6_1654141_1654895	16.6019	0.861767	0.309791	2.78176	0.00540642	0.0603656	GMDS	591032
chr22_30821524_30822804	24.0849	0.651658	0.234282	2.78151	0.0054106	0.0603819	MTFP1	-7
chr22_30821524_30822804.1	24.0849	0.651658	0.234282	2.78151	0.0054106	0.0603819	RP4-539M6.19	-16274
chr13_36568465_36569267	25.0642	0.710573	0.25561	2.77991	0.00543732	0.0606041	DCLK1	136177
chr7_18678582_18679162	19.1819	0.946443	0.340471	2.7798	0.0054392	0.0606099	HDAC9	-129647
chr3_150455613_150456150	14.8219	0.86554	0.311752	2.77638	0.00549686	0.0611912	SIAH2-AS1	23574
chr17_76384202_76385224	28.6086	0.626034	0.225529	2.77584	0.0055059	0.0612765	PGS1	-9482
chr10_58843755_58844769	24.9612	0.715738	0.257863	2.77565	0.00550913	0.0612972	MIR3924	219551
chr3_127831155_127832023	22.4964	0.677249	0.244046	2.77509	0.00551866	0.0613879	RUVBL1	40735
chr8_90851144_90851519	18.8645	0.720543	0.25971	2.77441	0.00553019	0.0614854	RNU6-925P	61534
chr9_115510226_115510675	15.1865	0.937096	0.337794	2.77417	0.0055343	0.0615089	RP11-276E15.4	2062
chr22_17962857_17963411	15.8053	0.784118	0.282812	2.77257	0.00556149	0.0617486	CECR2	-122019
chr9_131545580_131546415	33.6551	0.606888	0.21898	2.77143	0.00558111	0.0619277	TBC1D13	3068
chr6_107666569_107667085	14.2928	0.897054	0.323726	2.77103	0.00558792	0.0619415	PDSS2	113684
chr10_50743029_50743544	14.2927	1.0395	0.375237	2.77026	0.00560114	0.0620214	ERCC6	3529
chr10_50743029_50743544.1	14.2927	1.0395	0.375237	2.77026	0.00560114	0.0620214	ERCC6-PGBD3	4041
chr2_173924462_173924966	12.7736	1.0306	0.372063	2.76997	0.00560616	0.0620312	AC019046.1	1494
chr13_70617780_70618490	15.8985	0.936212	0.338043	2.76951	0.00561413	0.0620776	KLHL1	64102
chr21_39661582_39662333	25.1892	0.681385	0.246173	2.76792	0.00564156	0.0623035	KCNJ15	-32920
chr13_41540350_41541525	31.8653	0.658756	0.238056	2.76723	0.00565346	0.062404	ELF1	51926
chr6_41938192_41938765	22.0129	0.744542	0.269075	2.76704	0.00565677	0.062425	CCND3	79331
chr10_90850582_90851428	23.2343	0.753943	0.272656	2.76518	0.0056892	0.0626431	MIR4679-2	-27414
chr13_114054121_114055475	26.6239	0.612053	0.221494	2.76329	0.00572215	0.0629126	GRTP1	-35680
chr15_77479944_77480845	32.8736	0.606588	0.219531	2.76311	0.00572538	0.0629169	PEAK1	231642
chrX_52949857_52950748	15.5366	0.782489	0.283247	2.76256	0.00573493	0.0629908	FAM156B	-29522
chr2_71053773_71055013	28.1135	0.754462	0.273126	2.76232	0.00573925	0.0630072	CLEC4F	-6094
chr3_187636702_187637591	23.5742	0.709649	0.256963	2.76168	0.00575047	0.0630919	RP11-44H4.1	26419
chr14_89687368_89687973	15.7321	0.843311	0.305715	2.75849	0.00580698	0.0636096	FOXN3	397521
chr19_2625487_2625813	10.4628	0.994781	0.360757	2.75748	0.00582483	0.0637894	GNG7	76895
chr14_54917046_54917610	15.7242	0.936915	0.339828	2.75703	0.00583296	0.0638298	CNIH1	-8937
chr2_142292085_142292929	26.7615	0.690004	0.250292	2.75679	0.00583713	0.0638298	LRP1B	596342
chr10_69495245_69495668	11.1581	1.12204	0.407051	2.75651	0.00584227	0.0638704	CTNNA3	-39318
chr6_109216776_109217849	28.6562	0.644483	0.233814	2.75639	0.00584432	0.0638772	ARMC2	-47152
chr20_31587174_31587949	18.6294	0.735112	0.266819	2.7551	0.00586746	0.0640672	SUN5	4291
chr5_159612617_159613100	11.9852	1.06044	0.385036	2.75414	0.00588461	0.0641908	FABP6	1274
chr1_232855750_232856424	18.8295	0.809276	0.293921	2.75338	0.00589829	0.0642934	RP11-66A2.1	-1934
chr1_12661931_12662310	13.0338	0.963978	0.350661	2.74903	0.00597716	0.0649781	DHRS3	15428
chr9_72560573_72561068	11.3773	0.94247	0.342862	2.74883	0.00598077	0.0650014	RN7SL570P	-61007
chr10_12262246_12262801	12.8567	0.915725	0.333311	2.74736	0.00600774	0.0652421	CDC123	-24282
chr8_22542882_22543566	14.0201	0.899811	0.327525	2.7473	0.00600877	0.0652421	CTD-3247F14.2	-1360
chr15_64262633_64263311	21.3404	0.793666	0.289066	2.74562	0.00603966	0.0654465	DAPK2	75325
chr6_148762381_148763253	24.7327	0.742602	0.27046	2.7457	0.00603821	0.0654465	SASH1	-168942
chr7_116499278_116499831	12.5853	1.12438	0.409617	2.74495	0.00605193	0.0654762	CAPZA2	2696
chrX_65240326_65241044	11.2786	0.913329	0.333046	2.74235	0.00610012	0.0658582	MIR223	-1615
chr22_35805815_35806672	29.7119	0.611581	0.223155	2.74061	0.00613254	0.0661343	MCM5	-9760
chr7_27403851_27404339	13.6763	0.989165	0.361003	2.74004	0.00614311	0.0662322	AC004009.3	-2390
chr1_247598494_247599156	17.3774	0.795309	0.290291	2.7397	0.00614957	0.0662537	NLRP3	-19037
chr16_927227_928150	26.2762	0.640791	0.233973	2.73874	0.00616745	0.066389	LMF1	92850
chr3_108975990_108976534	13.4594	0.958987	0.350168	2.73865	0.00616924	0.066389	RNU6-1236P	-32015
chr3_192610805_192611308	18.7698	0.876834	0.320171	2.73864	0.00616941	0.066389	MB21D2	24643
chr14_103154596_103155153	15.8015	0.937136	0.342294	2.73781	0.00618499	0.0664745	RCOR1	-95599
chr16_14051021_14051932	21.7586	0.723182	0.264212	2.73713	0.00619784	0.0665804	CTD-2135D7.3	-4010
chr9_22029933_22030711	23.4234	0.764981	0.279566	2.73632	0.0062131	0.066696	RP11-145E5.5	-227299
chr2_30937792_30938547	20.176	0.785747	0.287191	2.73597	0.00621962	0.0667178	CAPN13	104862
chr1_172715313_172715848	20.821	0.780854	0.285432	2.73569	0.00622489	0.0667574	RP1-15D23.2	29197
chr2_68591776_68592794	30.6584	0.661544	0.241926	2.73449	0.00624764	0.0669539	AC015969.3	0
chr2_68591776_68592794.1	30.6584	0.661544	0.241926	2.73449	0.00624764	0.0669539	PLEK	0
chr12_93155345_93156430	21.6213	0.708322	0.259047	2.73434	0.00625061	0.0669695	PLEKHG7	-40065
chr13_48796502_48797460	25.8795	0.764611	0.279722	2.73347	0.0062671	0.0671139	ITM2B	9879
chr10_103761073_103761663	17.8009	0.869428	0.318111	2.73309	0.00627423	0.0671418	C10orf76	54288
chr13_50804424_50805027	19.5467	0.792162	0.289918	2.73237	0.00628807	0.0672576	DLEU1	-148118
chr3_101528271_101528933	18.574	0.807931	0.295722	2.73206	0.00629392	0.067304	NXPE3	-30198
chr3_18469303_18470685	34.0135	0.612597	0.224359	2.73043	0.00632519	0.0676059	SATB1	15681
chr3_18469303_18470685.1	34.0135	0.612597	0.224359	2.73043	0.00632519	0.0676059	TBC1D5	15625
chr1_90374231_90374848	14.5774	0.916272	0.335613	2.73014	0.00633074	0.0676465	LRRC8D	-87641
chr1_90374231_90374848.1	14.5774	0.916272	0.335613	2.73014	0.00633074	0.0676465	RP11-302M6.4	-275533
chr16_87035915_87036696	25.2321	0.668274	0.244782	2.73007	0.00633203	0.0676465	RP11-134D3.1	54694
chr9_27194282_27195069	22.9998	0.699751	0.256388	2.72927	0.00634743	0.0677785	TEK	-85144
chr10_14695267_14695993	17.7798	0.771605	0.282815	2.7283	0.00636612	0.0679129	FAM107B	120904
chr10_14695267_14695993.1	17.7798	0.771605	0.282815	2.7283	0.00636612	0.0679129	RP11-7C6.1	-527
chr9_92171478_92172228	13.0464	0.941962	0.345251	2.72834	0.00636543	0.0679129	GADD45G	47700
chr11_12243707_12244231	11.9604	0.995314	0.364924	2.72745	0.00638254	0.0680229	MICAL2	-26216
chr14_58967659_58968114	11.2707	1.29578	0.475112	2.72732	0.00638507	0.0680335	KIAA0586	-73557
chr1_28572864_28574063	25.8878	0.64417	0.236301	2.72606	0.00640957	0.0682456	ATPIF1	-10212
chr1_28572864_28574063.1	25.8878	0.64417	0.236301	2.72606	0.00640957	0.0682456	RP5-1092A3.5	0
chr9_123253249_123253836	22.3883	0.7091	0.260388	2.72325	0.00646436	0.0687139	CDK5RAP2	88601
chrX_19700784_19701563	11.8393	0.99318	0.364753	2.72289	0.00647145	0.068766	SH3KBP1	204157
chr11_47939260_47940147	26.7915	0.641411	0.235575	2.72275	0.00647418	0.0687691	PTPRJ	61966
chr8_116597040_116597690	26.6793	0.71279	0.261865	2.72197	0.00648939	0.0688939	TRPS1	83539
chr1_55593526_55594020	10.1829	1.43711	0.528292	2.72029	0.00652249	0.0690844	USP24	86767
chr15_79280786_79281487	23.3708	0.71085	0.261535	2.71799	0.00656795	0.0693113	RASGRF1	101629
chr20_4754653_4755233	16.4106	0.757166	0.27868	2.71698	0.00658814	0.0694657	PRNT	-33339
chr3_10283845_10284528	21.0891	0.797237	0.293443	2.71684	0.00659091	0.0694784	IRAK2	-77297
chr8_19243195_19243755	26.6307	0.738587	0.271973	2.71566	0.00661432	0.0696428	SH2D4A	-71989
chr7_129176070_129176646	13.3003	1.03791	0.382382	2.71433	0.00664091	0.0698732	SMKR1	-33751
chr17_65427335_65428194	23.2998	0.691907	0.254989	2.71348	0.00665812	0.0700212	PITPNC1	-53761
chr18_74196665_74197111	11.8305	1.06175	0.391317	2.71327	0.00666223	0.0700313	ZNF516	10036
chr8_56690938_56691780	25.7884	0.762488	0.2811	2.71252	0.00667745	0.0701347	TGS1	-5238
chr5_100002765_100003426	26.716	0.658802	0.243145	2.7095	0.00673837	0.0706315	CTC-293G12.1	-9091
chr10_61667944_61668684	22.3689	0.741841	0.273809	2.70933	0.00674185	0.0706514	CCDC6	-1530
chr21_36864198_36864640	11.9412	0.991496	0.366084	2.70838	0.00676121	0.0708209	MIR802	228373
chr10_127798962_127799630	20.1715	0.799695	0.29532	2.70789	0.00677115	0.0708649	ADAM12	277395
chr2_68650927_68651694	26.4255	0.641686	0.236968	2.7079	0.00677098	0.0708649	FBXO48	42697
chr13_28633005_28633528	14.543	0.956899	0.353431	2.70746	0.00678	0.070901	FLT3	41202
chr3_139530166_139530918	19.2072	0.776633	0.286865	2.70731	0.00678316	0.0709173	RP11-166D18.1	25144
chr4_120021836_120022259	11.5911	0.911894	0.336974	2.70612	0.00680741	0.0711207	RP11-21I10.2	-30384
chr6_36930633_36931181	23.0411	0.618299	0.228499	2.70591	0.00681179	0.0711331	PI16	-8425
chr1_119626667_119627134	10.7258	0.99373	0.367376	2.70494	0.00683169	0.0712573	WARS2	56161
chr3_150887191_150888128	29.7644	0.620907	0.229536	2.70505	0.00682936	0.0712573	MED12L	-83011
chr3_193807217_193807830	27.1848	0.6334	0.234156	2.70503	0.00682975	0.0712573	RP11-135A1.3	1520
chr7_75596670_75597207	13.8914	0.86161	0.318713	2.7034	0.00686343	0.0715046	POR	-52274
chr12_76034594_76035354	22.9323	0.719195	0.26616	2.70212	0.00688992	0.07168	RP11-114H23.1	342442
chr1_15841623_15842141	13.5978	0.85442	0.316322	2.70111	0.00691084	0.0718472	CASP9	10889
chr20_48619646_48620123	20.0697	0.74923	0.277911	2.69593	0.00701918	0.0727726	SNAI1	-20111
chr8_123490375_123490976	21.791	0.793631	0.294382	2.69592	0.00701947	0.0727726	RP11-96B2.1	11079
chr7_104833584_104834102	16.9972	0.803579	0.298104	2.69563	0.00702558	0.072819	SRPK2	195240
chr3_161319927_161320687	17.3932	0.835049	0.309797	2.69547	0.00702891	0.0728365	OTOL1	-105332
chr3_195838637_195839269	14.0149	0.842972	0.312841	2.69457	0.00704789	0.0729823	TFRC	-29577
chr5_33675898_33676413	18.0156	0.81502	0.302608	2.69332	0.00707447	0.0731069	ADAMTS12	215885
chr6_147199391_147200510	20.8236	0.791588	0.294001	2.69247	0.00709247	0.0731757	STXBP5-AS1	325241
chr7_123507194_123507687	16.105	0.821132	0.305009	2.69216	0.00709915	0.0731896	HYAL4	-21972
chr4_77928523_77929230	19.7411	0.759965	0.282369	2.69139	0.0071154	0.0732893	2020-09-11	-57562
chr6_11206990_11207897	33.9552	0.620501	0.230564	2.69123	0.00711882	0.0732906	NEDD9	174685
chr6_11206990_11207897.1	33.9552	0.620501	0.230564	2.69123	0.00711882	0.0732906	RP3-510L9.1	-33306
chr7_98718098_98718725	15.0015	0.875572	0.325367	2.69103	0.00712322	0.073302	SMURF1	22999
chr3_167659007_167660016	33.1747	0.602948	0.224104	2.69049	0.00713477	0.0734039	RP11-298O21.5	-45272
chr13_99796506_99797110	21.0067	0.830265	0.308609	2.69035	0.00713773	0.0734174	UBAC2-AS1	55855
chr11_14576460_14577281	25.0909	0.734822	0.273367	2.68804	0.00718722	0.07379	PSMA1	87883
chr10_114149075_114149680	16.1701	0.907021	0.337483	2.6876	0.0071967	0.0738533	ACSL5	-15300
chr5_912387_913143	17.3542	0.795546	0.29607	2.68702	0.00720924	0.0739138	TRIP13	-19630
chr10_112033086_112034324	28.1998	0.659665	0.245535	2.68664	0.00721745	0.0739557	MXI1	-65724
chr2_161108835_161109225	11.5636	1.20446	0.448478	2.68567	0.00723841	0.074123	ITGB6	-52066
chr1_144000111_144000911	25.9505	0.630086	0.234843	2.68301	0.00729639	0.0745202	SRGAP2B	-86497
chr8_1055623_1056701	20.7522	0.824559	0.307421	2.68218	0.00731441	0.0746654	ERICH1-AS1	-367973
chr2_12043143_12043619	13.4342	0.847087	0.316103	2.67979	0.00736694	0.0750123	MIR4262	-66031
chr6_119468142_119469073	27.2908	0.594085	0.22176	2.67895	0.00738532	0.0751479	FAM184A	-67798
chr5_98355801_98356416	17.7138	0.863188	0.322223	2.67885	0.00738746	0.0751525	CTD-2007H13.3	-90927
chr22_17738759_17739481	30.7891	0.613089	0.228951	2.67782	0.00741035	0.0752177	CECR3	8143
chr4_140793338_140793878	21.365	0.673769	0.251613	2.6778	0.00741076	0.0752177	MAML3	281461
chr7_92271098_92271959	25.2951	0.646273	0.241325	2.67802	0.00740595	0.0752177	CDK6	193950
chr20_19717640_19718155	15.8395	0.81899	0.305872	2.67756	0.00741607	0.0752373	AL121761.1	-2087
chr2_212102359_212102674	10.7575	1.18708	0.443642	2.67576	0.00745602	0.0755406	RNA5SP119	297704
chr4_48038487_48039231	19.173	0.730142	0.272881	2.67568	0.00745785	0.0755406	NIPAL1	-19699
chr11_60163827_60164724	26.7377	0.597308	0.223259	2.6754	0.00746397	0.0755511	MS4A14	-17825
chr9_73178256_73179048	19.7708	0.68815	0.25731	2.6744	0.0074862	0.07569	TRPM3	557467
chr19_30101441_30102061	18.845	0.734938	0.274979	2.67271	0.00752415	0.0760047	POP4	-6518
chr1_119518400_119518888	11.2745	0.94094	0.352196	2.67163	0.00754828	0.0761792	TBX15	13292
chr22_24530079_24530529	12.8091	0.793632	0.29707	2.67153	0.00755057	0.0761846	CABIN1	-122282
chr3_186800593_186801170	17.2881	0.831767	0.311582	2.6695	0.00759649	0.076579	RPL39L	97527
chr17_41173091_41174527	23.2584	0.653491	0.244842	2.66903	0.00760716	0.0766519	VAT1	-801
chr14_42654784_42655365	17.0805	0.833938	0.312559	2.66809	0.00762828	0.0768101	RP11-313C4.1	82425
chr6_24359864_24360638	20.2508	0.686801	0.257408	2.66815	0.0076271	0.0768101	DCDC2	-1584
chr9_80176630_80177543	17.7073	0.820835	0.30768	2.66782	0.00763451	0.0768236	GNA14	85681
chr7_84001627_84002436	18.6723	0.697231	0.261462	2.66666	0.00766088	0.0770362	SEMA3A	-20
chr18_42871464_42872621	29.1758	0.619734	0.232421	2.66643	0.0076661	0.077068	SLC14A2	-78505
chr22_33651585_33652194	14.9395	0.919612	0.344893	2.66636	0.00766766	0.077068	LARGE	-33848
chr5_86594375_86595276	20.0866	0.820482	0.307724	2.6663	0.00766923	0.077068	RASA1	-30671
chr5_118733186_118733742	18.1222	0.895842	0.336068	2.66565	0.00768386	0.0771976	TNFAIP8	-42719
chr12_15853439_15853909	18.0381	0.886937	0.332821	2.66491	0.00770089	0.077289	RNU6-251P	-28695
chr2_143634769_143636187	29.8447	0.617262	0.231607	2.66512	0.00769601	0.077289	KYNU	0
chr11_10798937_10799986	25.8988	0.661931	0.248469	2.66403	0.00772096	0.0773956	CTR9	-26404
chr13_27488647_27489222	21.4989	0.734402	0.275735	2.66344	0.00773465	0.0774906	GPR12	-154220
chr11_32338183_32339098	20.7766	0.758901	0.285012	2.6627	0.00775168	0.0775987	RP1-65P5.1	25858
chr2_133335201_133335767	15.8465	0.896188	0.336674	2.66189	0.00777031	0.0777503	GPR39	-161055
chrX_19104108_19104824	13.786	0.885375	0.332634	2.66171	0.0077745	0.0777607	GPR64	35932
chr1_153571210_153571837	22.8885	0.681085	0.256049	2.65998	0.00781455	0.0780351	S100A16	13785
chr1_226862558_226863360	26.3651	0.587104	0.220716	2.66	0.00781417	0.0780351	ITPKB	63665
chr1_226862558_226863360.1	26.3651	0.587104	0.220716	2.66	0.00781417	0.0780351	ITPKB-AS1	-5961
chr1_226862558_226863360.2	26.3651	0.587104	0.220716	2.66	0.00781417	0.0780351	ITPKB-IT1	0
chr1_205680379_205680908	12.8137	1.08913	0.409531	2.65944	0.00782695	0.0781239	AC119673.1	1589
chr9_4938813_4939581	24.2246	0.682716	0.256724	2.65933	0.00782952	0.078132	AL158147.1	28516
chr13_43060865_43061488	25.1635	0.671679	0.252595	2.65911	0.00783467	0.0781484	TNFSF11	75384
chr3_5185869_5186560	17.936	0.926348	0.34849	2.65818	0.00785643	0.0783127	ARL8B	-21965
chr20_58691492_58692531	25.67	0.685143	0.257967	2.65593	0.00790904	0.0786962	RP5-1043L13.1	21017
chr2_26785236_26785872	16.9235	0.754244	0.284107	2.65479	0.00793574	0.0788868	C2orf70	0
chr6_18215581_18217003	27.9898	0.642909	0.242174	2.65474	0.00793706	0.0788868	KDM1B	-60022
chr2_172812700_172813689	25.2073	0.613807	0.231311	2.6536	0.00796374	0.0791165	HAT1	-33729
chr2_172812700_172813689.1	25.2073	0.613807	0.231311	2.6536	0.00796374	0.0791165	SLC25A12	51074
chr1_246750881_246751635	22.7133	0.727134	0.274222	2.65163	0.00801044	0.0794303	CNST	-21136
chr2_225579032_225579417	13.8618	0.802214	0.302581	2.65124	0.00801975	0.079478	CUL3	-128967
chr20_10841598_10842252	19.757	0.808498	0.305071	2.6502	0.00804448	0.0796699	RP11-103J8.1	-188023
chr5_96050553_96051001	13.6698	0.793183	0.299363	2.64956	0.00805957	0.0797307	AC020900.2	-20319
chr15_78653421_78653995	22.2033	0.663307	0.25044	2.64857	0.00808329	0.0798839	CRABP1	-20756
chr15_92404301_92404970	24.0292	0.673816	0.254445	2.64818	0.00809274	0.0798839	SLCO3A1	-7216
chr16_79662343_79663027	15.8932	0.857335	0.323715	2.64843	0.00808676	0.0798839	MAF	-27732
chr5_130714890_130715652	13.2464	0.909032	0.343269	2.64816	0.00809301	0.0798839	CDC42SE2	-115130
chr5_151182820_151183363	13.8966	0.909537	0.343406	2.64858	0.00808314	0.0798839	G3BP1	-31350
chr11_74292054_74292768	23.3633	0.590618	0.223089	2.64746	0.00810991	0.0799976	POLD3	10807
chr3_5236277_5237717	31.9811	0.606081	0.229023	2.64637	0.00813597	0.0801835	EDEM1	-6920
chr5_93881593_93882240	20.5031	0.692181	0.261607	2.64588	0.0081478	0.0802283	KIAA0825	72063
chr8_120700823_120701503	24.6857	0.676623	0.255821	2.64491	0.00817138	0.0803901	RN7SKP153	22883
chr2_232505354_232505934	15.4126	0.737648	0.278923	2.64463	0.00817792	0.080407	RN7SL499P	5051
chr5_55164571_55165066	15.9565	0.84946	0.321204	2.64461	0.00817851	0.080407	IL31RA	-17365
chr6_110833869_110834653	17.6686	0.727147	0.274952	2.64463	0.00817806	0.080407	CTA-331P3.1	-34760
chr17_76438604_76439310	25.7015	0.661299	0.250069	2.64446	0.0081821	0.0804245	DNAH17	134167
chr2_150715401_150716127	24.9929	0.719513	0.272111	2.64419	0.00818873	0.0804719	AC007364.1	0
chr4_82392845_82393496	18.6965	0.723588	0.273804	2.64272	0.0082242	0.0807492	RASGEF1B	0
chr10_120489064_120489664	18.3468	0.787537	0.298203	2.64095	0.00826748	0.0810668	CACUL1	25095
chr19_50447880_50448186	11.0584	1.05881	0.401042	2.64014	0.00828709	0.0812054	CTC-326K19.6	13463
chr21_30535160_30536281	27.688	0.597047	0.226238	2.63902	0.00831471	0.0813687	MAP3K7CL	-85369
chr6_127503571_127504125	17.0193	0.743583	0.282	2.63682	0.00836868	0.0817561	RSPO3	-63823
chr3_38125824_38126069	14.4135	0.749172	0.2842	2.63607	0.00838725	0.0818626	DLEC1	-45129
chr12_106669750_106670225	13.4751	0.990632	0.376059	2.63425	0.00843235	0.0820868	CKAP4	27805
chr2_37617250_37618054	23.0455	0.717781	0.272475	2.6343	0.00843104	0.0820868	RNU6-1116P	44698
chr2_57717722_57718345	17.5077	0.819327	0.311063	2.63396	0.00843951	0.0821385	SNORD78	53325
chr1_204386236_204387012	20.3988	0.774673	0.294242	2.63277	0.00846904	0.082354	RP11-739N20.2	-39259
chr13_46093684_46093963	10.8167	1.12697	0.428172	2.63205	0.00848705	0.082493	COG3	-54625
chr1_218524551_218525372	18.9514	0.821626	0.312304	2.63086	0.00851703	0.0826221	TGFB2	-4975
chr2_216529515_216530003	14.8368	0.917685	0.348947	2.62987	0.00854173	0.0828255	AC012668.2	-118595
chr2_216529515_216530003.1	14.8368	0.917685	0.348947	2.62987	0.00854173	0.0828255	LINC00607	178257
chr14_78473247_78473970	18.094	0.771682	0.293521	2.62906	0.0085622	0.0829699	RNA5SP388	170295
chr6_108682521_108683209	30.3943	0.618878	0.23541	2.62894	0.00856525	0.0829813	RNU6-770P	30068
chr16_19524794_19525421	18.7956	0.770357	0.293088	2.62842	0.00857833	0.083051	GDE1	8047
chr21_46461040_46461647	22.273	0.66987	0.25487	2.62828	0.00858174	0.083051	AP001579.1	31281
chr3_45208508_45209427	25.6001	0.613064	0.233381	2.62689	0.008617	0.0832652	CDCP1	-20594
chr1_246734568_246735114	12.8575	0.96746	0.36839	2.62619	0.00863477	0.0833405	CNST	-4823
chr10_26378709_26379320	21.0678	0.72635	0.276585	2.62614	0.00863602	0.0833405	MYO3A	-155514
chr2_196931745_196932161	10.9085	1.1054	0.42092	2.62616	0.00863541	0.0833405	DNAH7	1376
chr12_123210562_123210997	13.3168	1.03331	0.393486	2.62603	0.0086386	0.0833473	RP11-324E6.9	55
chr4_8821095_8821641	12.9902	0.855289	0.325753	2.62557	0.00865035	0.0833703	RP13-582L3.4	40913
chr14_50704114_50704583	14.2127	0.932792	0.355313	2.62527	0.00865802	0.0834262	L2HGDH	74304
chr1_110438380_110439093	22.5096	0.66462	0.253252	2.62435	0.00868151	0.0835983	RP11-195M16.3	0
chr1_42107092_42107523	10.6705	0.856	0.326558	2.62128	0.00876009	0.0840457	HIVEP3	276856
chr20_50149127_50149461	11.8626	0.93236	0.355795	2.6205	0.00878008	0.0841833	NFATC2	29910
chr13_44833057_44833623	24.069	0.610802	0.233122	2.62009	0.00879061	0.0842661	RP11-478K15.6	-15729
chr17_62257463_62258378	37.3125	0.591098	0.225619	2.61989	0.00879569	0.0842785	TEX2	82284
chr17_76379894_76380692	28.6019	0.640655	0.244528	2.61996	0.00879397	0.0842785	PGS1	-5174
chr7_968174_968766	24.1315	0.592951	0.226367	2.61942	0.00880794	0.0843712	ADAP1	25568
chr18_34879438_34879843	10.2989	0.921177	0.351955	2.61731	0.00886246	0.0847358	CELF4	265948
chr6_102209037_102209589	18.3287	0.813284	0.311018	2.61491	0.00892505	0.0851514	GRIK2	-362374
chr6_10838365_10839136	19.6052	0.65895	0.252163	2.61319	0.00897004	0.0854891	MAK	0
chr6_10838365_10839136.1	19.6052	0.65895	0.252163	2.61319	0.00897004	0.0854891	RP11-637O19.3	-90339
chr5_112860557_112861214	17.7439	0.855659	0.327485	2.61282	0.00897992	0.0855649	YTHDC2	-11152
chr3_3151877_3152273	10.3201	0.973847	0.372847	2.61192	0.00900359	0.0856804	IL5RA	0
chr16_58529019_58529461	12.1272	0.849232	0.325229	2.61118	0.00902294	0.0858278	RNU6-103P	1351
chr1_206238559_206239106	17.2677	0.841341	0.322293	2.61048	0.0090414	0.0859187	C1orf186	49542
chr9_116102111_116102848	20.8957	0.629175	0.241072	2.60991	0.00905672	0.0859331	WDR31	0
chr10_16608235_16609035	14.1074	0.763184	0.292639	2.60793	0.00910907	0.0862968	C1QL3	-44231
chr3_33833062_33833868	24.3558	0.692478	0.265635	2.60688	0.00913724	0.0865084	RP11-10C24.2	1770
chr4_62350700_62351694	20.6147	0.670199	0.257226	2.60548	0.00917447	0.0867927	LPHN3	-283725
chr8_6789737_6790172	18.194	0.798123	0.30636	2.60518	0.00918257	0.0868452	GS1-24F4.3	-3608
chr3_5239120_5239725	18.394	0.74883	0.287474	2.60486	0.00919109	0.0868803	EDEM1	-9763
chr6_24229914_24230657	15.3292	0.898985	0.345123	2.60482	0.00919213	0.0868803	DCDC2	127624
chr8_135854539_135855023	18.7727	0.879257	0.337681	2.60381	0.00921932	0.0870448	AC083843.3	-4228
chr11_47569199_47569637	13.4009	0.925659	0.355592	2.60315	0.00923716	0.0870918	CELF1	5033
chr14_61943322_61944007	28.4269	0.621793	0.23893	2.60241	0.00925713	0.0871984	PRKCH	-154888
chr3_71625766_71626838	23.4077	0.676845	0.260094	2.60231	0.00925982	0.0872053	FOXP1	6067
chr14_51478691_51479366	21.4818	0.730015	0.280668	2.60099	0.00929555	0.0874123	TRIM9	82682
chr8_125700005_125700475	21.2009	0.688444	0.264698	2.60086	0.00929894	0.0874257	MTSS1	40196
chr19_14727223_14727815	19.803	0.707045	0.272002	2.59941	0.00933849	0.087779	RN7SL842P	-28055
chr6_108463071_108463785	17.372	0.723751	0.278527	2.59849	0.00936335	0.0879384	OSTM1-AS1	-18235
chr3_196227695_196228531	18.7367	0.726394	0.279609	2.59789	0.00937992	0.0880755	RNF168	2109
chr2_43653212_43654225	32.0009	0.588001	0.226506	2.59596	0.0094327	0.0884341	THADA	168961
chr8_17783956_17784577	21.0709	0.734122	0.282815	2.59577	0.00943797	0.0884341	PCM1	-3420
chr16_23107570_23108253	15.2793	0.98234	0.378471	2.59555	0.00944394	0.0884528	USP31	52339
chr8_6385880_6386397	17.2125	0.786237	0.302976	2.59504	0.00945786	0.0885071	ANGPT2	34534
chr8_6385880_6386397.1	17.2125	0.786237	0.302976	2.59504	0.00945786	0.0885071	MCPH1	-121768
chr3_22406217_22406772	14.0413	0.793723	0.305937	2.5944	0.00947554	0.088581	ZNF385D	7352
chrX_39286693_39287649	15.8756	0.795907	0.306816	2.59409	0.00948422	0.0886435	RP11-157D23.2	6430
chr20_11226909_11227556	15.3172	0.764132	0.294608	2.59372	0.00949425	0.0886877	RP4-734C18.1	54618
chr7_117951338_117951969	29.6045	0.588708	0.227065	2.59269	0.00952296	0.0888416	ANKRD7	-96612
chr9_117797910_117798555	18.6186	0.728588	0.28108	2.5921	0.00953908	0.088895	TNC	76482
chr4_38968900_38969354	11.5935	0.972691	0.375314	2.59167	0.00955117	0.0889517	TMEM156	64688
chr20_52225456_52226638	24.6684	0.676303	0.260963	2.59157	0.00955387	0.0889583	AC005808.3	-564
chr20_52225456_52226638.1	24.6684	0.676303	0.260963	2.59157	0.00955387	0.0889583	ZNF217	0
chr11_77156436_77157124	17.4792	0.919031	0.354694	2.59105	0.00956827	0.0890551	DKFZP434E1119	27292
chr3_44397181_44397633	16.14	0.933816	0.360716	2.58879	0.00963142	0.0894185	TCAIM	-17571
chr20_8380519_8381130	27.2246	0.640032	0.247256	2.58854	0.00963848	0.0894468	PLCB1	-267696
chr6_76884095_76884865	25.209	0.665816	0.257246	2.58824	0.00964667	0.0894482	RNU6-248P	-81545
chr6_110092526_110093597	25.0977	0.589658	0.227813	2.58835	0.00964383	0.0894482	FIG4	-80012
chr15_50010388_50010781	15.1516	0.902111	0.348552	2.58817	0.00964875	0.0894489	RP11-353B9.1	-66053
chr5_39076974_39077449	12.7843	1.06535	0.41164	2.58806	0.00965193	0.0894597	RICTOR	-2464
chr13_77919402_77920001	17.6425	0.851678	0.329139	2.58759	0.00966495	0.0895291	MYCBP2	-18588
chr4_170739101_170739794	21.822	0.720085	0.278366	2.58683	0.00968624	0.0896657	AC106878.1	-32670
chr3_104240744_104241559	23.4774	0.603871	0.233523	2.58592	0.00971188	0.0897724	AC016970.1	-467104
chr18_3595016_3596168	25.7842	0.697709	0.269841	2.58563	0.00972024	0.0898123	DLGAP1	859168
chr18_3595016_3596168.1	25.7842	0.697709	0.269841	2.58563	0.00972024	0.0898123	DLGAP1-AS1	-1287
chr17_19366374_19366974	19.5639	0.749685	0.289995	2.58516	0.00973331	0.0899145	CTB-187M2.1	-5982
chr11_76103875_76104355	10.8697	1.03665	0.401017	2.58506	0.00973615	0.0899221	RP11-111M22.2	-11507
chr11_76103875_76104355.1	10.8697	1.03665	0.401017	2.58506	0.00973615	0.0899221	RP11-111M22.5	-636
chr2_235217282_235217960	21.4125	0.685932	0.26539	2.58462	0.00974868	0.0900191	RP11-309M7.1	-85325
chr2_66721556_66722249	17.3297	0.811421	0.313974	2.58436	0.00975604	0.0900684	MEIS1	-59292
chr20_22392277_22393031	19.1367	0.68983	0.266997	2.58366	0.00977568	0.0901935	RP5-1004I9.1	8251
chr10_14226724_14227947	28.342	0.614572	0.237917	2.58314	0.00979056	0.0902934	FRMD4A	276195
chrX_12628142_12628596	11.3685	0.930152	0.360129	2.58283	0.0097994	0.0903375	FRMPD4	-471558
chr1_3223176_3223994	23.2952	0.714198	0.276718	2.58096	0.00985257	0.0906959	PRDM16	-237445
chr1_3223176_3223994.1	23.2952	0.714198	0.276718	2.58096	0.00985257	0.0906959	RP11-22L13.1	2667
chr14_45559049_45559559	11.6609	1.03606	0.401609	2.57977	0.0098865	0.0908583	PRPF39	-5748
chr17_62985064_62985432	10.6627	1.13102	0.438552	2.57898	0.00990911	0.0910097	AMZ2P1	-13378
chr3_152019571_152020695	29.5534	0.630429	0.244491	2.57853	0.00992207	0.0910949	MBNL1	-32877
chr5_142585618_142586356	18.9994	0.767091	0.297503	2.57843	0.00992502	0.0910994	ARHGAP26	-435670
chr16_73049821_73050786	19.9282	0.71877	0.278781	2.57826	0.00992994	0.0911258	ZFHX3	42812
chr17_60668831_60669381	12.9958	0.866775	0.336262	2.57768	0.00994663	0.0912037	TLK2	-132813
chr11_7176129_7176686	15.4948	0.922369	0.357935	2.57692	0.0099686	0.09133	RBMXL2	-65965
chr15_72529612_72530284	18.8052	0.777165	0.301682	2.57611	0.00999193	0.0914872	PKM	-5928
chr1_72577303_72577695	14.8462	0.818875	0.318213	2.57336	0.0100717	0.0919908	NEGR1	170723
chr17_21189509_21190259	17.8478	0.703741	0.273465	2.57342	0.0100698	0.0919908	MAP2K3	-1526
chr2_32721740_32722089	12.4978	0.913566	0.354983	2.57355	0.0100661	0.0919908	BIRC6	-139645
chr16_89707461_89707862	12.5629	1.2048	0.468249	2.573	0.0100822	0.0920488	CHMP1A	16197
chr18_46703944_46704676	20.4866	0.861013	0.334715	2.57238	0.0101002	0.0921515	RP11-30L3.2	27606
chr1_111934882_111935448	15.1187	0.843382	0.328311	2.56885	0.0102036	0.0928289	PGCP1	-2409
chr10_97601341_97601842	17.3855	0.773492	0.301111	2.5688	0.0102052	0.0928289	ENTPD1	-129806
chr10_97601341_97601842.1	17.3855	0.773492	0.301111	2.5688	0.0102052	0.0928289	ENTPD1-AS1	248154
chr10_97601341_97601842.2	17.3855	0.773492	0.301111	2.5688	0.0102052	0.0928289	RP11-429G19.3	-8077
chr10_75410056_75410791	21.4172	0.724256	0.282035	2.56796	0.0102299	0.0929844	SYNPO2L	5040
chr2_139262352_139262849	13.9319	0.959142	0.373568	2.56751	0.0102431	0.0930402	SPOPL	-2982
chr8_134979629_134980225	27.7093	0.601542	0.234286	2.56756	0.0102417	0.0930402	RP11-157E21.1	-80891
chr9_117642531_117643042	12.4956	0.960625	0.374208	2.56709	0.0102556	0.0930976	TNFSF8	49656
chr1_89395904_89396738	19.7465	0.718171	0.279871	2.56608	0.0102857	0.0932939	GTF2B	-38603
chr12_59578949_59579606	13.7936	0.866769	0.337843	2.5656	0.0102998	0.0934032	RNU6-279P	183327
chr15_78311168_78311828	20.7746	0.721127	0.281143	2.56499	0.010318	0.0935493	TBC1D2B	58239
chr17_2061317_2061748	16.1091	0.822189	0.320637	2.56424	0.0103402	0.0936012	SMG6	145318
chr6_88457251_88457754	17.2097	0.796632	0.310723	2.5638	0.0103533	0.093659	snoU13	-26619
chr3_185049997_185050656	17.6053	0.837976	0.326911	2.56331	0.0103678	0.0937529	MAP3K13	-49184
chr16_22428326_22428818	19.224	0.704847	0.274992	2.56316	0.0103725	0.0937632	CDR2	19669
chr11_86303772_86304279	16.5589	0.851093	0.332141	2.56244	0.0103939	0.0938546	ME3	78962
chr11_86303772_86304279.1	16.5589	0.851093	0.332141	2.56244	0.0103939	0.0938546	RP11-317J19.1	-161141
chr2_161423207_161423624	14.5367	0.82293	0.321164	2.56233	0.0103972	0.0938654	RBMS1	-72902
chr3_186508458_186509883	27.8904	0.651802	0.254509	2.56101	0.0104367	0.0941156	RFC4	14602
chr3_151593479_151594041	17.0101	0.779733	0.304522	2.56052	0.0104516	0.0941854	RP11-454C18.2	51923
chr3_151593479_151594041.1	17.0101	0.779733	0.304522	2.56052	0.0104516	0.0941854	SUCNR1	-2049
chr1_224356553_224357149	23.1254	0.708938	0.276892	2.56034	0.010457	0.0941948	SNORA72	10194
chr14_75701149_75701729	14.4723	0.908075	0.354696	2.56015	0.0104627	0.0942088	RP11-293M10.2	24385
chr6_138132370_138133020	17.7754	0.887216	0.3466	2.55977	0.0104741	0.0942927	RP11-356I2.4	49609
chr6_139760299_139760812	11.5213	0.925295	0.36169	2.55826	0.0105199	0.0945704	RP11-12A2.3	33381
chr6_113955878_113956445	15.7293	0.837642	0.327588	2.55699	0.0105581	0.0948379	RP11-367G18.1	-2162
chr6_168257659_168258081	10.6647	0.992683	0.388297	2.5565	0.0105731	0.0949338	MLLT4	-30019
chr16_23515933_23516596	24.7336	0.662591	0.259196	2.55633	0.0105783	0.0949381	GGA2	5220
chr7_92408182_92408778	19.2255	0.772851	0.302368	2.55599	0.0105885	0.0949381	CDK6	57131
chr4_140442654_140443831	32.711	0.59288	0.231987	2.55566	0.0105987	0.0949915	SETD7	33532
chr9_8384063_8384467	11.3423	1.02921	0.402743	2.55551	0.0106031	0.0950121	PTPRD	2228257
chr1_12256674_12257240	17.5897	0.825669	0.323222	2.55449	0.0106343	0.0951977	TNFRSF1B	-29615
chr11_12195877_12196521	20.7164	0.701938	0.27483	2.55408	0.0106468	0.095231	MICAL2	20971
chr5_83900988_83901399	11.0625	1.10449	0.432521	2.55361	0.0106612	0.0952984	EDIL3	-220377
chr9_117645931_117646351	14.0289	0.84712	0.331741	2.55356	0.0106629	0.0952984	TNFSF8	46347
chr6_45401920_45402306	12.9305	1.04239	0.408276	2.55316	0.0106751	0.0953881	RUNX2	-105861
chr1_150780010_150780311	10.4498	1.12238	0.439774	2.55217	0.0107055	0.0955641	CTSK	489
chrX_65265870_65267126	17.3143	0.783158	0.30692	2.55167	0.0107209	0.0956616	VSIG4	-5921
chr7_73476317_73476800	12.3858	0.857453	0.336066	2.55144	0.0107279	0.0956762	CTB-51J22.1	0
chr7_73476317_73476800.1	12.3858	0.857453	0.336066	2.55144	0.0107279	0.0956762	ELN	-34199
chr8_19562302_19562747	13.3956	0.888387	0.348217	2.55124	0.0107339	0.0957024	CSGALNACT1	-22208
chr14_95731752_95732350	16.2528	0.772203	0.302691	2.55113	0.0107375	0.095715	CLMN	53894
chr5_30725107_30725633	15.636	0.867574	0.34012	2.55079	0.010748	0.0957893	CDH6	468224
chr10_129019335_129019854	10.2047	0.916001	0.359244	2.5498	0.0107784	0.0959837	DOCK1	-425358
chr12_27584106_27584489	13.3753	0.866627	0.339867	2.5499	0.0107753	0.0959837	RP11-165P7.1	15070
chr7_11598568_11599533	22.9539	0.692524	0.271599	2.5498	0.0107784	0.0959837	THSD7A	272292
chr1_180984237_180984620	14.5012	0.923052	0.362122	2.54901	0.0108029	0.0961052	STX6	7428
chr10_12349334_12349937	21.9683	0.671244	0.263445	2.54795	0.0108358	0.0963103	RN7SL198P	20452
chr6_155662129_155662869	18.9808	0.778129	0.305398	2.54792	0.0108367	0.0963103	TFB1M	-26511
chr10_33797935_33798625	18.4733	0.760887	0.298651	2.54774	0.0108422	0.0963206	RP11-476F14.1	90344
chr1_198850224_198850910	24.0445	0.619709	0.243309	2.54701	0.0108651	0.0963893	MIR181A1	-21942
chr2_217070073_217071093	24.487	0.641076	0.251721	2.54677	0.0108726	0.0964369	XRCC5	-97887
chr6_334775_335112	13.8839	0.811393	0.318666	2.54622	0.0108898	0.0964928	DUSP22	-42679
chr17_48997046_48997541	13.9823	0.745616	0.29292	2.54546	0.0109135	0.0966614	RP11-700H6.4	-9453
chr1_86603090_86603677	21.4555	0.682231	0.268053	2.54513	0.0109237	0.0966688	COL24A1	18779
chr2_9470650_9471292	12.6392	0.937591	0.368642	2.54337	0.010979	0.0969363	ASAP2	-123757
chr5_40437603_40438109	17.3459	0.787037	0.309566	2.54238	0.0110099	0.0971126	AC108105.1	-117184
chr9_17601053_17601669	18.2027	0.785268	0.30907	2.54074	0.0110617	0.0973765	SH3GL2	-21974
chr20_2065374_2065829	12.8358	0.981493	0.386479	2.53958	0.0110987	0.0975477	STK35	16428
chr6_110830870_110831589	21.2479	0.745927	0.293821	2.53871	0.0111261	0.0977309	CTA-331P3.1	-31761
chr16_67398286_67399145	21.723	0.737035	0.29036	2.53835	0.0111378	0.0977953	LRRC36	-16981
chr7_150452500_150453028	20.615	0.589691	0.232308	2.5384	0.0111359	0.0977953	GIMAP5	-18065
chr19_46981612_46982157	14.0227	0.839981	0.331004	2.53768	0.0111591	0.0979272	PNMAL1	-6792
chr14_56180195_56180715	12.9906	0.880786	0.347306	2.53605	0.0112111	0.0982446	RP11-813I20.2	34211
chr18_57552757_57553676	21.1114	0.71598	0.282385	2.53547	0.0112295	0.0983485	PMAIP1	13504
chr6_34283504_34284062	18.2743	0.744003	0.293526	2.53471	0.0112542	0.0985254	NUDT3	76390
chr6_34283504_34284062.1	18.2743	0.744003	0.293526	2.53471	0.0112542	0.0985254	RPS10-NUDT3	109764
chr1_84891184_84891587	13.351	0.841953	0.332183	2.53461	0.0112574	0.0985342	DNASE2B	-26970
chr1_60140048_60140709	24.8863	0.614998	0.242722	2.53375	0.0112848	0.0986967	FGGY	-377396
chr15_67857023_67857700	19.0427	0.811298	0.320217	2.53359	0.0112901	0.0987237	RP11-502I4.3	-22081
chr2_45957030_45957508	22.5997	0.630693	0.249136	2.53152	0.0113568	0.0990189	U51244.2	-54415
chr22_51131823_51132990	25.227	0.599229	0.236714	2.53144	0.0113595	0.0990189	SHANK3	-18981
chr5_14998573_14999010	13.1487	0.964893	0.381161	2.53146	0.0113589	0.0990189	AC016575.1	-87824
chr9_80324331_80324915	16.5778	0.857302	0.33865	2.53153	0.0113566	0.0990189	GNA14	-61108
chr2_198123185_198123841	19.1361	0.723818	0.28594	2.53137	0.0113619	0.099021	ANKRD44	51671
chr2_198123185_198123841.1	19.1361	0.723818	0.28594	2.53137	0.0113619	0.099021	ANKRD44-IT1	43403
chr11_129154401_129155129	21.1264	0.72004	0.284536	2.53058	0.0113875	0.0991467	RNU6-874P	-81541
chr2_84743328_84743914	17.2207	0.70557	0.278845	2.53033	0.0113955	0.0991827	DNAH6	0
chr4_47512282_47512998	18.956	0.788767	0.311727	2.53031	0.0113961	0.0991827	ATP10D	-24978
chr20_17943253_17943848	17.7498	0.732137	0.289413	2.52973	0.0114151	0.0993289	SNORD17	0
chr20_17943253_17943848.1	17.7498	0.732137	0.289413	2.52973	0.0114151	0.0993289	SNX5	5776
chr3_11330207_11331371	29.3634	0.589174	0.232951	2.52918	0.0114329	0.0994452	ATG7	-16106
chr6_157790441_157791002	16.2607	0.786835	0.311178	2.52857	0.0114528	0.0995593	ZDHHC14	11163
chr1_61332616_61333037	10.8821	1.09007	0.431147	2.52831	0.0114613	0.0995698	NFIA	-1686
chr10_102830754_102831555	23.6395	0.622721	0.24635	2.52779	0.0114783	0.0996643	KAZALD1	-9157
chr1_10438522_10438939	17.1724	0.685985	0.271408	2.52751	0.0114875	0.0996914	KIF1B	-146215
chr2_101508202_101509003	20.4653	0.68223	0.269918	2.52755	0.0114861	0.0996914	NPAS2	-71589

## Sheet: ChIPseqDEseq2CRYBMIM-PBS1hCBPdn
region	baseMean	log2FoldChange	lfcSE	stat	pvalue	padj	gene	distance
chr19_821123_825717	212.572	-1.2156	0.0815931	-14.8983	3.37973e-50	5.01518e-46	LPPR3	0
chr2_232254655_232261790	152.531	-1.34685	0.0958819	-14.0469	8.04284e-45	5.96738e-41	AC017104.6	-969
chr19_4542352_4544653	110.618	-1.44474	0.10349	-13.9603	2.72453e-44	1.68909e-40	SEMA6B	15168
chr16_89041817_89046018	136.331	-1.45973	0.108787	-13.4182	4.72975e-41	2.33949e-37	CBFA2T3	0
chr8_130602251_130606099	171.397	-1.2355	0.101072	-12.224	2.31409e-34	9.36514e-31	CCDC26	86387
chr19_33757651_33760083	92.3898	-1.274	0.113119	-11.2624	2.01162e-29	5.97009e-26	CTD-2540B15.12	16563
chr19_1854278_1858210	136.74	-1.16951	0.104369	-11.2055	3.82996e-29	1.06562e-25	KLF16	5358
chr20_31170718_31173344	54.2234	-1.6903	0.150958	-11.1971	4.21143e-29	1.10282e-25	C20orf112	0
chr20_31170718_31173344.1	54.2234	-1.6903	0.150958	-11.1971	4.21143e-29	1.10282e-25	RP11-410N8.1	-954
chr9_139512858_139515739	68.7512	-1.48035	0.132928	-11.1365	8.33529e-29	1.95296e-25	U3	-15892
chr11_47412089_47417421	162.922	-0.943635	0.0878564	-10.7407	6.55798e-27	1.3902e-23	RP11-750H9.5	13321
chr10_7448771_7456144	178.867	-0.863599	0.0812742	-10.6257	2.26189e-26	4.57693e-23	SFMBT2	0
chr8_130555307_130562718	219.526	-0.828896	0.0809681	-10.2373	1.34936e-24	2.61171e-21	CCDC26	129768
chr9_139923838_139928130	83.111	-1.30063	0.128592	-10.1144	4.76782e-24	8.84371e-21	C9orf139	-1923
chr9_139923838_139928130.1	83.111	-1.30063	0.128592	-10.1144	4.76782e-24	8.84371e-21	FUT7	0
chr19_54883645_54888633	164.647	-0.930618	0.0939983	-9.90037	4.14733e-23	6.83802e-20	LAIR1	-1480
chr19_16247380_16254275	237.333	-0.791255	0.0812719	-9.7359	2.11931e-22	3.36947e-19	CTD-2231E14.8	0
chr19_16247380_16254275.1	237.333	-0.791255	0.0812719	-9.7359	2.11931e-22	3.36947e-19	HSH2D	-2543
chr19_1066865_1069596	91.995	-1.13406	0.116525	-9.7323	2.19566e-22	3.37048e-19	HMHA1	-944
chr16_85644077_85648286	98.6652	-1.08079	0.112231	-9.63007	5.96892e-22	8.85728e-19	GSE1	0
chr18_60765236_60768463	127.895	-1.132	0.11769	-9.61849	6.68016e-22	9.59292e-19	RP11-299P2.1	50091
chr17_56412267_56417740	155.515	-0.842293	0.089304	-9.43175	4.03319e-21	5.6108e-18	BZRAP1-AS1	-9457
chr17_56412267_56417740.1	155.515	-0.842293	0.089304	-9.43175	4.03319e-21	5.6108e-18	MIR4736	0
chr5_963146_965384	82.0017	-1.22048	0.130257	-9.36981	7.26643e-21	9.80241e-18	RP11-661C8.3	14096
chr5_134879099_134880863	46.166	-1.44561	0.155649	-9.28757	1.57848e-20	2.06674e-17	NEUROG1	-7460
chr10_73506037_73509623	95.3967	-1.08321	0.116728	-9.2798	1.69804e-20	2.15976e-17	C10orf54	23633
chr10_73506037_73509623.1	95.3967	-1.08321	0.116728	-9.2798	1.69804e-20	2.15976e-17	CDH23	-349345
chr16_88850296_88852232	43.6458	-1.47827	0.162268	-9.11003	8.23607e-20	9.64856e-17	PIEZO1	0
chr19_34286106_34289109	106.224	-0.89581	0.100459	-8.91718	4.78306e-19	5.19335e-16	KCTD15	0
chr11_64510261_64513738	94.2598	-0.966607	0.109314	-8.84247	9.36217e-19	9.26168e-16	RASGRP2	0
chr10_22540665_22542366	46.5664	-1.35578	0.154777	-8.75954	1.96054e-18	1.89733e-15	RP11-573G6.6	4349
chr17_80055179_80057995	80.6093	-1.00088	0.115045	-8.69986	3.32295e-18	3.1474e-15	FASN	0
chr11_414794_417570	59.9727	-1.25745	0.145064	-8.66825	4.38808e-18	4.06967e-15	SIGIRR	0
chr2_219260481_219265533	139.223	-0.791716	0.0915287	-8.64992	5.15347e-18	4.68198e-15	CTDSP1	0
chr2_219260481_219265533.1	139.223	-0.791716	0.0915287	-8.64992	5.15347e-18	4.68198e-15	RP11-378A13.2	0
chr2_219260481_219265533.2	139.223	-0.791716	0.0915287	-8.64992	5.15347e-18	4.68198e-15	SLC11A1	-13730
chr17_80172706_80176242	84.4709	-0.975255	0.114028	-8.55275	1.20185e-17	1.07006e-14	RP13-516M14.2	-604
chr10_7549633_7551108	40.1578	-1.4368	0.168575	-8.52321	1.55185e-17	1.35458e-14	RNU6-535P	-20862
chr19_4064111_4068622	160.879	-0.758777	0.089101	-8.51592	1.65273e-17	1.4149e-14	ZBTB7A	0
chr21_36260203_36263862	109.39	-0.906173	0.107565	-8.42446	3.62428e-17	2.98782e-14	RUNX1	0
chr16_30483662_30486137	55.171	-1.18205	0.140772	-8.3969	4.58429e-17	3.71053e-14	ITGAL	0
chr17_42295264_42299274	77.2535	-1.00785	0.120392	-8.37142	5.69261e-17	4.52532e-14	RP5-882C2.2	0
chr17_42295264_42299274.1	77.2535	-1.00785	0.120392	-8.37142	5.69261e-17	4.52532e-14	UBTF	0
chr19_35167606_35169119	121.629	-0.760158	0.0909274	-8.36005	6.26906e-17	4.89613e-14	ZNF302	0
chr7_5569000_5571711	71.7783	-1.10237	0.13241	-8.32547	8.39964e-17	6.23211e-14	ACTB	0
chr19_51225891_51228720	96.0778	-0.973976	0.118261	-8.23584	1.78296e-16	1.28019e-13	CLEC11A	0
chr21_34773317_34776706	96.3074	-0.904474	0.111087	-8.14201	3.88779e-16	2.74719e-13	IFNGR2	0
chr17_48225742_48229775	94.8057	-0.902476	0.111277	-8.11018	5.05468e-16	3.51593e-13	PPP1R9B	0
chr19_42746244_42749407	190.17	-0.670568	0.0827767	-8.10092	5.45431e-16	3.73553e-13	AC006486.1	0
chr19_42746244_42749407.1	190.17	-0.670568	0.0827767	-8.10092	5.45431e-16	3.73553e-13	AC006486.9	9878
chr19_42746244_42749407.2	190.17	-0.670568	0.0827767	-8.10092	5.45431e-16	3.73553e-13	GSK3A	0
chr3_46338793_46343405	107.958	-0.924724	0.115639	-7.99661	1.27888e-15	8.25103e-13	CCR2	51820
chr8_145050334_145053240	96.8164	-0.930064	0.11655	-7.97997	1.46369e-15	9.30842e-13	PARP10	7375
chr8_145050334_145053240.1	96.8164	-0.930064	0.11655	-7.97997	1.46369e-15	9.30842e-13	PLEC	0
chr3_196358540_196362067	135.709	-0.790351	0.0992825	-7.96063	1.71163e-15	1.07319e-12	LINC01063	0
chr8_1948885_1951499	93.347	-0.88732	0.111824	-7.93497	2.10545e-15	1.30178e-12	KBTBD11	-26842
chr19_2289285_2291118	62.795	-1.25334	0.158279	-7.91852	2.4036e-15	1.46577e-12	LINGO3	906
chr19_833688_836881	95.349	-0.903082	0.114376	-7.89573	2.88632e-15	1.71321e-12	PRTN3	4082
chr16_86015691_86019039	88.0201	-0.930179	0.117932	-7.88744	3.08457e-15	1.80679e-12	RP11-542M13.2	-336
chr6_74229666_74232137	136.312	-0.910069	0.115641	-7.86976	3.55336e-15	2.05435e-12	EEF1A1	0
chr7_128577685_128581454	76.281	-1.01094	0.128582	-7.8622	3.77447e-15	2.15421e-12	IRF5	0
chr16_126085_128802	61.9227	-1.09325	0.139593	-7.83174	4.81166e-15	2.67751e-12	MPG	0
chr3_196364955_196370447	122.097	-0.767087	0.0995293	-7.70715	1.28658e-14	6.73819e-12	NRROS	0
chr6_35463959_35466451	52.4672	-1.17633	0.15322	-7.6774	1.62352e-14	8.40401e-12	TEAD3	0
chr6_35463959_35466451.1	52.4672	-1.17633	0.15322	-7.6774	1.62352e-14	8.40401e-12	TULP1	14265
chr19_42386859_42388666	66.3118	-1.04226	0.137582	-7.57554	3.57624e-14	1.82992e-11	ARHGEF1	0
chr3_13460697_13463037	61.4653	-1.01761	0.135598	-7.50464	6.15976e-14	3.08105e-11	NUP210	0
chrX_153191366_153194100	48.2483	-1.13341	0.151632	-7.47473	7.73618e-14	3.82657e-11	ARHGAP4	0
chr19_826257_828525	72.2351	-1.04053	0.139417	-7.46346	8.42807e-14	4.12299e-11	AZU1	0
chr16_54317714_54321117	70.8803	-0.987386	0.13263	-7.44465	9.72049e-14	4.70356e-11	IRX3	0
chr7_148395346_148396981	37.9472	-1.31922	0.177549	-7.43015	1.08471e-13	5.19226e-11	CUL1	-341
chr7_148395346_148396981.1	37.9472	-1.31922	0.177549	-7.43015	1.08471e-13	5.19226e-11	RP5-1136G13.2	0
chr2_232252865_232253737	26.2984	-1.67146	0.225278	-7.41952	1.17547e-13	5.56683e-11	AC017104.6	0
chr17_79479434_79482534	70.9256	-0.962363	0.129775	-7.4156	1.21072e-13	5.67344e-11	ACTG1	0
chr17_79479434_79482534.1	70.9256	-0.962363	0.129775	-7.4156	1.21072e-13	5.67344e-11	RP13-766D20.2	0
chr9_134151801_134154125	44.045	-1.39737	0.188669	-7.40644	1.29733e-13	6.01596e-11	FAM78A	0
chr5_139027574_139029834	47.4657	-1.20176	0.1626	-7.39088	1.45862e-13	6.69418e-11	CTD-3224K15.2	0
chr5_139027574_139029834.1	47.4657	-1.20176	0.1626	-7.39088	1.45862e-13	6.69418e-11	CXXC5	0
chr3_50374455_50378804	104.611	-0.766723	0.104259	-7.354	1.92363e-13	8.64994e-11	RASSF1	0
chr3_50374455_50378804.1	104.611	-0.766723	0.104259	-7.354	1.92363e-13	8.64994e-11	ZMYND10	5480
chr3_50374455_50378804.2	104.611	-0.766723	0.104259	-7.354	1.92363e-13	8.64994e-11	ZMYND10-AS1	0
chr15_75492987_75495779	63.412	-0.991578	0.13551	-7.31737	2.52878e-13	1.11459e-10	C15orf39	-1755
chr19_49122085_49122944	160.804	-0.831259	0.113794	-7.30492	2.77425e-13	1.2108e-10	AC022154.7	4446
chr19_49122085_49122944.1	160.804	-0.831259	0.113794	-7.30492	2.77425e-13	1.2108e-10	RPL18	0
chr19_49122085_49122944.2	160.804	-0.831259	0.113794	-7.30492	2.77425e-13	1.2108e-10	SPHK2	0
chr20_62608978_62612842	104.232	-0.909621	0.124642	-7.29789	2.92313e-13	1.26339e-10	PRPF6	0
chr20_62608978_62612842.1	104.232	-0.909621	0.124642	-7.29789	2.92313e-13	1.26339e-10	SAMD10	0
chr20_62608978_62612842.2	104.232	-0.909621	0.124642	-7.29789	2.92313e-13	1.26339e-10	ZNF512B	67272
chr11_72926782_72929810	66.9442	-0.991276	0.136253	-7.27525	3.45778e-13	1.45217e-10	P2RY2	0
chr11_72926782_72929810.1	66.9442	-0.991276	0.136253	-7.27525	3.45778e-13	1.45217e-10	RP11-800A3.2	0
chr22_50241752_50243427	36.1544	-1.34459	0.185265	-7.25766	3.93856e-13	1.63862e-10	ZBED4	4063
chr19_3365770_3367684	73.0074	-0.871032	0.120129	-7.25081	4.14278e-13	1.70763e-10	NFIC	-6210
chr11_67044084_67045896	64.9914	-1.01928	0.140669	-7.24596	4.29373e-13	1.75362e-10	ADRBK1	-10204
chr1_249239763_249240617	68.7821	-1.01828	0.142353	-7.15322	8.4765e-13	3.33937e-10	RNU6-1205P	-32769
chr1_151137996_151139019	89.5552	-0.709889	0.0992908	-7.1496	8.70337e-13	3.39867e-10	LYSMD1	0
chr1_151137996_151139019.1	89.5552	-0.709889	0.0992908	-7.1496	8.70337e-13	3.39867e-10	SCNM1	0
chrX_39963889_39966286	31.2083	-1.38283	0.193617	-7.14206	9.19394e-13	3.55902e-10	BCOR	70297
chr10_134260176_134262889	58.2662	-0.957274	0.134379	-7.12367	1.05091e-12	3.96468e-10	C10orf91	-2346
chr10_102819976_102822662	62.646	-0.952129	0.13425	-7.09221	1.31991e-12	4.85607e-10	KAZALD1	0
chr10_102819976_102822662.1	62.646	-0.952129	0.13425	-7.09221	1.31991e-12	4.85607e-10	RP11-108L7.15	0
chr11_68080096_68080951	18.4201	-1.99172	0.282469	-7.0511	1.77506e-12	6.37261e-10	C11orf24	-40681
chr17_56408611_56411766	73.8262	-0.874524	0.124344	-7.03308	2.02024e-12	7.1948e-10	BZRAP1-AS1	-5801
chr17_56408611_56411766.1	73.8262	-0.874524	0.124344	-7.03308	2.02024e-12	7.1948e-10	MIR142	0
chr5_179218886_179221060	55.7406	-1.10061	0.158348	-6.95055	3.63852e-12	1.25563e-09	LTC4S	0
chr5_179218886_179221060.1	55.7406	-1.10061	0.158348	-6.95055	3.63852e-12	1.25563e-09	MAML1	-59036
chr17_27893153_27896105	57.7503	-1.00876	0.145173	-6.94869	3.68681e-12	1.2625e-09	ABHD15	0
chr17_27893153_27896105.1	57.7503	-1.00876	0.145173	-6.94869	3.68681e-12	1.2625e-09	RP11-68I3.2	-5589
chr17_27893153_27896105.2	57.7503	-1.00876	0.145173	-6.94869	3.68681e-12	1.2625e-09	TP53I13	0
chr8_130677206_130679952	126.998	-0.759448	0.109407	-6.9415	3.87965e-12	1.3184e-09	CCDC26	12534
chr19_36207377_36209672	118.227	-0.743775	0.107222	-6.93676	4.01201e-12	1.35305e-09	KMT2B	0
chr19_36207377_36209672.1	118.227	-0.743775	0.107222	-6.93676	4.01201e-12	1.35305e-09	ZBTB32	-11949
chr5_134816912_134819093	48.6989	-1.12758	0.162728	-6.92927	4.23017e-12	1.40533e-09	TIFAB	-28823
chr7_74070922_74073140	69.0399	-0.815942	0.118217	-6.90209	5.12428e-12	1.68976e-09	GTF2I	0
chr17_79789533_79796401	155.793	-0.622889	0.0906277	-6.87306	6.28392e-12	2.02711e-09	FAM195B	0
chr17_79789533_79796401.1	155.793	-0.622889	0.0906277	-6.87306	6.28392e-12	2.02711e-09	PPP1R27	0
chr17_80407285_80409103	85.772	-0.683385	0.0998614	-6.84333	7.73705e-12	2.43815e-09	C17orf62	0
chr8_67578705_67580152	118.41	-0.6299	0.0920558	-6.84259	7.77718e-12	2.43815e-09	C8orf44	0
chr8_67578705_67580152.1	118.41	-0.6299	0.0920558	-6.84259	7.77718e-12	2.43815e-09	C8orf44-SGK3	0
chr8_67578705_67580152.2	118.41	-0.6299	0.0920558	-6.84259	7.77718e-12	2.43815e-09	VCPIP1	0
chr17_61776471_61779607	88.4622	-0.721046	0.105794	-6.81558	9.38871e-12	2.92278e-09	LIMD2	0
chr3_44596335_44597074	14.3024	-2.06262	0.302877	-6.81009	9.75396e-12	3.0154e-09	ZKSCAN7	0
chr1_9900_10569	56.9038	-1.06801	0.157285	-6.79028	1.11913e-11	3.43588e-09	DDX11L1	1300
chr17_27465813_27468658	72.018	-0.901424	0.133003	-6.77745	1.22315e-11	3.7295e-09	MYO18A	38773
chr17_27465813_27468658.1	72.018	-0.901424	0.133003	-6.77745	1.22315e-11	3.7295e-09	RP11-321A17.4	0
chr1_111745318_111748538	93.8847	-0.735224	0.108849	-6.75454	1.4329e-11	4.33934e-09	CHI3L2	-1926
chr1_111745318_111748538.1	93.8847	-0.735224	0.108849	-6.75454	1.4329e-11	4.33934e-09	DENND2D	0
chr4_1857152_1858647	50.3228	-0.984376	0.145904	-6.74674	1.51207e-11	4.53183e-09	LETM1	0
chr19_694690_695703	30.5071	-1.4875	0.221363	-6.7197	1.82094e-11	5.40418e-09	PRSS57	0
chr9_137216613_137219100	42.0137	-1.10027	0.16407	-6.70609	1.99915e-11	5.89379e-09	RXRA	0
chr19_7980745_7983086	67.8908	-0.999085	0.149827	-6.66828	2.58823e-11	7.53075e-09	TGFBR3L	0
chr2_43451367_43455275	100.298	-0.702107	0.105321	-6.66636	2.62222e-11	7.5801e-09	ZFP36L2	0
chr1_25359974_25361482	55.5741	-0.96053	0.144703	-6.63796	3.1806e-11	9.13489e-09	MIR4425	-9981
chr5_134731195_134737601	144.993	-0.60806	0.0917617	-6.62651	3.43708e-11	9.80823e-09	CTC-203F4.2	0
chr5_134731195_134737601.1	144.993	-0.60806	0.0917617	-6.62651	3.43708e-11	9.80823e-09	H2AFY	0
chr8_99305400_99306786	55.8394	-0.958479	0.145217	-6.6003	4.10313e-11	1.15607e-08	NIPAL2	0
chrX_40012068_40015272	46.3499	-1.0145	0.153749	-6.59839	4.15633e-11	1.15642e-08	BCOR	21311
chr10_134233642_134236851	71.3293	-0.897218	0.136239	-6.5856	4.53065e-11	1.24501e-08	RP11-432J24.2	-1056
chr7_5594538_5596616	53.3137	-0.98291	0.149538	-6.57299	4.93153e-11	1.34685e-08	CTB-161C1.1	0
chr8_145732697_145735383	109.067	-0.668126	0.102681	-6.50679	7.67748e-11	2.07138e-08	MFSD3	0
chr16_30468576_30471763	86.6942	-0.772822	0.118813	-6.50451	7.79486e-11	2.09038e-08	SEPHS2	-11074
chr8_142425030_142426679	42.4766	-1.16235	0.17885	-6.499	8.08544e-11	2.15533e-08	PTP4A3	-22938
chr11_67034063_67036149	40.0321	-1.21578	0.188034	-6.46577	1.00782e-10	2.62369e-08	ADRBK1	-183
chr11_32913804_32916146	61.2349	-0.873149	0.13515	-6.46061	1.04283e-10	2.69904e-08	QSER1	0
chr17_43298792_43299751	21.9106	-1.59147	0.247206	-6.43783	1.21198e-10	3.1187e-08	CTD-2020K17.1	0
chr17_43298792_43299751.1	21.9106	-1.59147	0.247206	-6.43783	1.21198e-10	3.1187e-08	FMNL1	0
chr9_123638043_123640283	77.067	-0.735255	0.114265	-6.43465	1.23756e-10	3.15589e-08	PHF19	0
chr8_48648987_48651593	89.4935	-0.743556	0.115778	-6.42228	1.34247e-10	3.39561e-08	CEBPD	56
chr10_124907185_124909754	39.8393	-1.1415	0.177977	-6.41377	1.41964e-10	3.57051e-08	HMX2	0
chr22_18717949_18718220	159.671	-0.776691	0.121379	-6.39889	1.56512e-10	3.89243e-08	AC008132.1	3207
chr11_279070_280667	38.1115	-1.14774	0.179779	-6.38416	1.72342e-10	4.23876e-08	NLRP6	-706
chr12_6960418_6962056	83.7925	-0.745728	0.117267	-6.35921	2.02788e-10	4.96016e-08	USP5	0
chr5_139039371_139041381	50.7241	-1.03339	0.162736	-6.35013	2.15127e-10	5.23324e-08	CXXC5	-11495
chr19_3359443_3361449	53.7798	-0.92635	0.146211	-6.33571	2.36254e-10	5.68505e-08	NFIC	0
chr3_127278986_127279729	15.3657	-2.00968	0.317879	-6.32216	2.57931e-10	6.14028e-08	RP11-59J16.1	-23331
chr19_29096833_29099454	86.5859	-0.774658	0.122909	-6.3027	2.92508e-10	6.92638e-08	AC005307.3	119134
chr19_29096833_29099454.1	86.5859	-0.774658	0.122909	-6.3027	2.92508e-10	6.92638e-08	AC005394.1	39757
chr19_29096833_29099454.2	86.5859	-0.774658	0.122909	-6.3027	2.92508e-10	6.92638e-08	AC005616.1	24182
chr19_29096833_29099454.3	86.5859	-0.774658	0.122909	-6.3027	2.92508e-10	6.92638e-08	AC079466.1	0
chr16_4321396_4323967	84.2797	-0.697394	0.110668	-6.30167	2.94463e-10	6.93578e-08	TFAP4	0
chr9_33523321_33524878	55.0462	-0.947932	0.15047	-6.29982	2.97982e-10	6.98172e-08	ANKRD18B	0
chr7_45017066_45020772	102.748	-0.701348	0.111592	-6.28494	3.27984e-10	7.60461e-08	MYO1G	0
chr19_10612633_10614523	91.1614	-0.69375	0.110594	-6.27295	3.54278e-10	8.1717e-08	KEAP1	0
chr7_118816_120244	38.7786	-1.18084	0.188631	-6.26003	3.84898e-10	8.83223e-08	AC093627.9	29119
chr16_691547_692810	38.2825	-1.13705	0.181823	-6.25362	4.01042e-10	9.11491e-08	FAM195A	0
chr22_46465531_46468544	56.8006	-0.84587	0.135263	-6.25352	4.01312e-10	9.11491e-08	FLJ27365	-15783
chr22_46465531_46468544.1	56.8006	-0.84587	0.135263	-6.25352	4.01312e-10	9.11491e-08	RP6-109B7.4	0
chr8_11141420_11142838	88.3931	-0.674892	0.107995	-6.24928	4.12353e-10	9.27108e-08	MTMR9	0
chr16_28994935_28996486	33.7454	-1.16683	0.186752	-6.24798	4.15788e-10	9.30132e-08	LAT	0
chr16_28994935_28996486.1	33.7454	-1.16683	0.186752	-6.24798	4.15788e-10	9.30132e-08	RP11-264B17.3	-8811
chr16_28994935_28996486.2	33.7454	-1.16683	0.186752	-6.24798	4.15788e-10	9.30132e-08	SPNS1	-8843
chr22_46692126_46693319	34.4762	-1.16658	0.187136	-6.23388	4.55015e-10	1.00277e-07	GTSE1	0
chr2_174218914_174220609	36.6535	-1.18687	0.19069	-6.22407	4.84425e-10	1.03679e-07	AC092573.2	328
chr2_174218914_174220609.1	36.6535	-1.18687	0.19069	-6.22407	4.84425e-10	1.03679e-07	CDCA7	0
chr12_111494505_111495536	24.4372	-1.38386	0.222542	-6.21844	5.02126e-10	1.06443e-07	CUX2	-22678
chr17_37490515_37494899	104.37	-0.706232	0.113558	-6.21912	4.99946e-10	1.06443e-07	FBXL20	63878
chr8_22422640_22423861	36.6295	-1.14523	0.185089	-6.18745	6.11433e-10	1.27192e-07	RP11-582J16.3	824
chr8_22422640_22423861.1	36.6295	-1.14523	0.185089	-6.18745	6.11433e-10	1.27192e-07	SORBS3	-13433
chr5_133859813_133863574	78.7218	-0.768109	0.124356	-6.17669	6.54594e-10	1.35537e-07	PHF15	0
chr20_45984558_45986948	59.9931	-0.824656	0.13362	-6.17165	6.75797e-10	1.3928e-07	ZMYND8	0
chr3_196695388_196697007	41.3985	-1.05909	0.171816	-6.16407	7.09e-10	1.4545e-07	PIGZ	0
chr1_228756234_228757064	29.159	-1.37663	0.223781	-6.15169	7.66594e-10	1.5512e-07	RNA5S6	249
chr4_2934905_2937418	58.5411	-0.958614	0.155853	-6.15077	7.71094e-10	1.55325e-07	MFSD10	0
chr4_2934905_2937418.1	58.5411	-0.958614	0.155853	-6.15077	7.71094e-10	1.55325e-07	NOP14-AS1	0
chrX_3060518_3061858	26.774	-1.24307	0.20353	-6.10755	1.01173e-09	2.01067e-07	RN7SL578P	-83975
chr14_88788395_88790537	38.7638	-1.11584	0.182753	-6.10571	1.02344e-09	2.01202e-07	KCNK10	2715
chr2_130200740_130201309	16.9105	-1.59086	0.26071	-6.10203	1.04727e-09	2.0448e-07	snoU13	-15746
chr8_37654118_37656771	78.2432	-0.787437	0.1291	-6.09941	1.06459e-09	2.06954e-07	GPR124	0
chr5_126111824_126114463	77.4428	-0.813966	0.133595	-6.0928	1.10955e-09	2.14755e-07	LMNB1	0
chr5_126111824_126114463.1	77.4428	-0.813966	0.133595	-6.0928	1.10955e-09	2.14755e-07	RP11-434D11.4	0
chr12_133065085_133066847	48.2403	-0.910375	0.149796	-6.07745	1.22106e-09	2.32299e-07	FBRSL1	0
chr2_97534078_97536745	54.7727	-0.900949	0.148899	-6.05073	1.44188e-09	2.70836e-07	SEMA4C	0
chr8_28242871_28244329	39.6835	-1.11624	0.18478	-6.04092	1.53236e-09	2.85422e-07	ZNF395	0
chr16_30406393_30407141	23.001	-1.42713	0.23633	-6.03873	1.55329e-09	2.88116e-07	2020-09-01	172
chr16_30406393_30407141.1	23.001	-1.42713	0.23633	-6.03873	1.55329e-09	2.88116e-07	ZNF48	0
chr5_107716583_107718354	54.7809	-0.811204	0.134363	-6.0374	1.56619e-09	2.89304e-07	FBXL17	0
chr20_1874382_1876902	52.3918	-0.893835	0.148408	-6.02283	1.71397e-09	3.15292e-07	SIRPA	0
chr17_79828430_79830274	56.4271	-0.800977	0.133101	-6.01783	1.76772e-09	3.23842e-07	ARHGDIA	0
chrX_152989632_152993092	48.3516	-0.886499	0.14774	-6.00039	1.96843e-09	3.59133e-07	ABCD1	0
chrX_152989632_152993092.1	48.3516	-0.886499	0.14774	-6.00039	1.96843e-09	3.59133e-07	BCAP31	0
chr6_31553600_31555888	52.97	-0.912068	0.152372	-5.9858	2.15335e-09	3.88099e-07	LST1	0
chr2_85804477_85806372	56.823	-0.923674	0.154431	-5.98114	2.21575e-09	3.94554e-07	VAMP8	0
chr20_23029079_23032454	81.6747	-0.77184	0.129283	-5.97018	2.36996e-09	4.18664e-07	THBD	0
chr12_27932653_27933634	26.8746	-1.28286	0.214944	-5.96833	2.397e-09	4.21767e-07	KLHL42	0
chr12_27932653_27933634.1	26.8746	-1.28286	0.214944	-5.96833	2.397e-09	4.21767e-07	RP11-860B13.1	367
chr17_45771107_45773087	47.4303	-0.972808	0.163028	-5.96713	2.4146e-09	4.23192e-07	TBKBP1	0
chr7_73623936_73626542	51.4516	-0.87336	0.1464	-5.96558	2.43764e-09	4.25555e-07	LAT2	-211
chr11_69455517_69458515	47.9466	-0.986005	0.165357	-5.96289	2.47819e-09	4.29266e-07	CCND1	0
chr19_33792797_33794950	79.238	-0.705418	0.118588	-5.94847	2.70662e-09	4.65214e-07	CEBPA	0
chr19_33792797_33794950.1	79.238	-0.705418	0.118588	-5.94847	2.70662e-09	4.65214e-07	CEBPA-AS1	0
chr19_33792797_33794950.2	79.238	-0.705418	0.118588	-5.94847	2.70662e-09	4.65214e-07	CTD-2540B15.7	-613
chr3_52443412_52445470	207.819	-0.727472	0.122892	-5.91962	3.22678e-09	5.50369e-07	BAP1	0
chr3_52443412_52445470.1	207.819	-0.727472	0.122892	-5.91962	3.22678e-09	5.50369e-07	PHF7	0
chr1_150121710_150124446	52.5793	-0.958991	0.162367	-5.90632	3.49842e-09	5.92165e-07	PLEKHO1	-338
chr10_21813575_21816579	83.6448	-0.667121	0.113087	-5.89917	3.65332e-09	6.16041e-07	SKIDA1	0
chr8_130680681_130682091	30.6661	-1.36014	0.231005	-5.88792	3.91091e-09	6.56989e-07	CCDC26	10395
chr5_94955623_94957293	33.6783	-1.13676	0.193127	-5.88606	3.95504e-09	6.61905e-07	GPR150	0
chr11_63684532_63686058	29.2707	-1.30692	0.222226	-5.88104	4.07698e-09	6.7722e-07	RCOR2	-216
chr17_7381657_7383317	35.4855	-1.13927	0.194033	-5.87155	4.31746e-09	7.11807e-07	ZBTB4	4266
chr17_42275739_42278172	80.3261	-0.720608	0.122741	-5.87095	4.33317e-09	7.11807e-07	ATXN7L3	0
chr17_42275739_42278172.1	80.3261	-0.720608	0.122741	-5.87095	4.33317e-09	7.11807e-07	CTB-175E5.7	0
chr9_66493090_66494147	31.7716	-1.17475	0.200378	-5.86265	4.55533e-09	7.45551e-07	RP11-262H14.7	26635
chr19_5680191_5681347	73.6906	-0.68715	0.117221	-5.86201	4.57286e-09	7.45678e-07	C19orf70	0
chr19_5680191_5681347.1	73.6906	-0.68715	0.117221	-5.86201	4.57286e-09	7.45678e-07	HSD11B1L	0
chr19_5680191_5681347.2	73.6906	-0.68715	0.117221	-5.86201	4.57286e-09	7.45678e-07	RPL36	-5234
chr12_121973838_121976327	58.1606	-0.853195	0.145651	-5.85782	4.68984e-09	7.61961e-07	KDM2B	0
chr5_176830845_176831833	21.2952	-1.51685	0.259034	-5.85578	4.74765e-09	7.65765e-07	F12	4745
chr3_14639694_14640556	22.9785	-1.24359	0.212505	-5.85203	4.85611e-09	7.80431e-07	AC090952.5	50384
chr11_67139560_67142055	42.9328	-1.07815	0.184468	-5.84466	5.0761e-09	8.11258e-07	AP003419.11	0
chr11_67139560_67142055.1	42.9328	-1.07815	0.184468	-5.84466	5.0761e-09	8.11258e-07	CLCF1	0
chr19_10675995_10677916	92.4002	-0.647229	0.110748	-5.84418	5.09062e-09	8.11258e-07	CDKN2D	1820
chr19_10675995_10677916.1	92.4002	-0.647229	0.110748	-5.84418	5.09062e-09	8.11258e-07	KRI1	0
chr4_84029351_84032501	63.7269	-0.783419	0.13406	-5.84379	5.10259e-09	8.11258e-07	PLAC8	3389
chr20_61425317_61428104	81.9486	-0.753368	0.128931	-5.84319	5.12118e-09	8.11315e-07	MRGBP	0
chr22_38200473_38201498	20.6516	-1.42732	0.244408	-5.83989	5.22347e-09	8.24586e-07	H1F0	0
chr11_2290254_2291970	36.9726	-1.15593	0.198017	-5.83754	5.29756e-09	8.32172e-07	ASCL2	213
chr17_4850509_4853844	86.9927	-0.634983	0.108984	-5.82639	5.66401e-09	8.72473e-07	PFN1	0
chr1_154973001_154976723	72.2076	-0.748216	0.128684	-5.81435	6.08686e-09	9.27976e-07	ZBTB7B	0
chr22_31741766_31743920	53.0072	-0.85212	0.146578	-5.81342	6.12078e-09	9.29961e-07	AC005003.1	0
chr22_31741766_31743920.1	53.0072	-0.85212	0.146578	-5.81342	6.12078e-09	9.29961e-07	PATZ1	0
chr1_228768379_228775557	64.7101	-0.796439	0.137103	-5.80907	6.28209e-09	9.51224e-07	RNA5S11	0
chr1_228768379_228775557.1	64.7101	-0.796439	0.137103	-5.80907	6.28209e-09	9.51224e-07	RNA5S12	0
chr1_228768379_228775557.2	64.7101	-0.796439	0.137103	-5.80907	6.28209e-09	9.51224e-07	RNA5S13	0
chr1_228768379_228775557.3	64.7101	-0.796439	0.137103	-5.80907	6.28209e-09	9.51224e-07	RNA5S14	0
chr15_91806044_91808976	75.0385	-0.774389	0.134366	-5.7633	8.24832e-09	1.22806e-06	SV2B	-162865
chr2_43445669_43447578	46.3978	-0.94704	0.164978	-5.74039	9.44606e-09	1.39242e-06	ZFP36L2	6171
chr22_39266364_39269148	64.9275	-0.755108	0.132181	-5.71269	1.11202e-08	1.62307e-06	CBX6	0
chr22_50623175_50625246	54.9747	-0.775176	0.135817	-5.7075	1.14647e-08	1.66789e-06	RP3-402G11.25	5586
chr20_61273335_61274459	30.2988	-1.21235	0.212473	-5.70589	1.1574e-08	1.6783e-06	RP11-93B14.6	198
chr13_34083794_34084297	12.7023	-1.85102	0.324819	-5.69862	1.20784e-08	1.72679e-06	RP11-141M1.3	166609
chr16_88868337_88870561	55.9352	-0.884986	0.155284	-5.69915	1.20406e-08	1.72679e-06	CDT1	0
chr19_50093153_50095297	72.5085	-0.742311	0.130298	-5.69701	1.21924e-08	1.73409e-06	PRR12	0
chr19_50093153_50095297.1	72.5085	-0.742311	0.130298	-5.69701	1.21924e-08	1.73409e-06	PRRG2	-8571
chr2_65215071_65217845	73.4771	-0.756015	0.132849	-5.69078	1.26461e-08	1.79289e-06	SLC1A4	0
chr17_1012160_1013022	20.0706	-1.36152	0.239515	-5.68447	1.31217e-08	1.85441e-06	ABR	77595
chr8_133438170_133439269	46.0493	-0.944182	0.16622	-5.68033	1.34437e-08	1.89074e-06	KCNQ3	53932
chr22_19753256_19755038	38.0192	-1.05088	0.185288	-5.6716	1.41466e-08	1.97419e-06	TBX1	-9031
chr19_51964849_51967697	66.8426	-0.836246	0.147598	-5.66571	1.46418e-08	2.0369e-06	SIGLEC8	-3139
chr11_72863856_72865826	49.2183	-1.0516	0.185745	-5.66152	1.50041e-08	2.06937e-06	FCHSD2	-10898
chr9_139439575_139441614	55.3569	-0.792368	0.139941	-5.66215	1.49486e-08	2.06937e-06	MIR4674	0
chr9_139439575_139441614.1	55.3569	-0.792368	0.139941	-5.66215	1.49486e-08	2.06937e-06	NOTCH1	0
chr9_139439575_139441614.2	55.3569	-0.792368	0.139941	-5.66215	1.49486e-08	2.06937e-06	RP11-611D20.2	0
chr9_140311703_140312587	19.4371	-1.52449	0.269765	-5.65119	1.59344e-08	2.18935e-06	EXD3	5128
chr11_72914821_72917192	60.6435	-0.947071	0.167643	-5.64933	1.61073e-08	2.2063e-06	RP11-800A3.2	9767
chr16_2523635_2525691	48.9444	-0.906916	0.160563	-5.64835	1.61996e-08	2.21214e-06	NTN3	-2136
chr16_2523635_2525691.1	48.9444	-0.906916	0.160563	-5.64835	1.61996e-08	2.21214e-06	TBC1D24	0
chr5_415382_417315	27.5598	-1.34169	0.238263	-5.63113	1.79035e-08	2.42991e-06	C5orf55	25944
chr2_85764788_85767440	77.2146	-0.707414	0.125796	-5.6235	1.8713e-08	2.52438e-06	MAT2A	0
chr10_124892738_124898148	103.729	-0.599834	0.106744	-5.61937	1.91658e-08	2.57545e-06	HMX3	0
chr10_134743627_134745990	39.1875	-0.803289	0.14296	-5.61899	1.92073e-08	2.57545e-06	TTC40	10100
chr5_176934802_176938058	72.6202	-0.739424	0.131699	-5.6145	1.97137e-08	2.63542e-06	DOK3	0
chr2_43186329_43189891	80.6833	-0.756449	0.134971	-5.60454	2.08811e-08	2.77481e-06	AC016735.1	43310
chr13_91999257_92001760	65.8239	-0.709664	0.126637	-5.60391	2.09573e-08	2.77666e-06	MIR17HG	1099
chr15_26107099_26108824	38.9809	-0.959621	0.171481	-5.59608	2.19247e-08	2.88763e-06	ATP10A	0
chr1_53791557_53793649	51.2495	-0.848475	0.151833	-5.58823	2.29399e-08	3.01243e-06	LRP8	0
chr19_796717_798364	84.384	-0.640806	0.114719	-5.58588	2.3252e-08	3.04444e-06	PTBP1	0
chrX_40033443_40036617	58.5124	-0.738746	0.132374	-5.58076	2.39468e-08	3.12621e-06	BCOR	0
chr11_3185455_3186822	27.8538	-1.22737	0.220143	-5.57533	2.47059e-08	3.21589e-06	OSBPL5	0
chr10_7517206_7518317	27.115	-1.24166	0.222951	-5.56922	2.55889e-08	3.32111e-06	RP5-1031D4.2	-3302
chr16_66583164_66584241	32.1509	-1.05263	0.18911	-5.56624	2.60295e-08	3.35872e-06	TK2	75
chr16_66583164_66584241.1	32.1509	-1.05263	0.18911	-5.56624	2.60295e-08	3.35872e-06	Y_RNA	0
chr15_85175812_85177625	38.7605	-0.980244	0.176412	-5.55656	2.75148e-08	3.51976e-06	RP11-182J1.1	0
chr15_85175812_85177625.1	38.7605	-0.980244	0.176412	-5.55656	2.75148e-08	3.51976e-06	SCAND2P	-1131
chr2_242673644_242675319	45.3042	-0.876964	0.157903	-5.5538	2.79529e-08	3.56556e-06	AC114730.8	0
chr2_242673644_242675319.1	45.3042	-0.876964	0.157903	-5.5538	2.79529e-08	3.56556e-06	D2HGDH	0
chr15_75073024_75076441	59.4947	-0.797695	0.143728	-5.55003	2.85616e-08	3.63278e-06	CSK	0
chr22_50246386_50249061	94.5482	-0.647008	0.116627	-5.54767	2.89501e-08	3.67171e-06	ZBED4	0
chr5_176560150_176562198	49.2175	-0.771158	0.139061	-5.54548	2.93146e-08	3.70738e-06	NSD1	0
chr2_172543708_172544757	44.2391	-0.918543	0.16588	-5.5374	3.07e-08	3.86066e-06	DYNC1I2	0
chr8_8750334_8751352	24.0928	-1.46576	0.264811	-5.53514	3.1098e-08	3.89969e-06	MFHAS1	0
chr2_33141271_33141527	3932.91	-1.00787	0.182378	-5.52629	3.27082e-08	4.09009e-06	LINC00486	-90762
chr21_44818513_44820054	43.8466	-0.923195	0.167748	-5.50346	3.72418e-08	4.5925e-06	SIK1	26955
chr10_81001959_81003824	36.1114	-1.00909	0.183397	-5.50223	3.75025e-08	4.61187e-06	ZMIZ1	-173168
chr5_1008889_1009806	15.9555	-1.54055	0.280038	-5.50122	3.77163e-08	4.61269e-06	NKD2	0
chr8_28269108_28270085	38.293	-0.974467	0.177122	-5.50169	3.76177e-08	4.61269e-06	RNU6-178P	3880
chr21_46961586_46962914	34.4426	-1.264	0.230119	-5.49283	3.95534e-08	4.82101e-06	SLC19A1	0
chr3_46395186_46397962	55.7235	-0.889801	0.162004	-5.49246	3.96363e-08	4.82101e-06	CCR2	0
chr18_13136564_13137385	17.1988	-1.55523	0.283225	-5.49113	3.99363e-08	4.84426e-06	RP11-794M8.2	48232
chr15_91427031_91429351	49.2573	-0.893667	0.162823	-5.48857	4.05198e-08	4.90168e-06	FES	0
chr1_167598677_167602130	69.444	-0.766602	0.139718	-5.48678	4.09326e-08	4.9382e-06	RCSD1	0
chr1_167598677_167602130.1	69.444	-0.766602	0.139718	-5.48678	4.09326e-08	4.9382e-06	RP3-455J7.4	0
chr8_107182594_107183472	22.7594	-1.33317	0.243402	-5.47722	4.32057e-08	5.18433e-06	RP11-778D12.2	97498
chr15_70389177_70394467	115.592	-0.614322	0.112321	-5.46934	4.51705e-08	5.37662e-06	TLE3	0
chr8_74883786_74885306	84.2105	-0.69465	0.126997	-5.46979	4.50561e-08	5.37662e-06	TCEB1	0
chr8_74883786_74885306.1	84.2105	-0.69465	0.126997	-5.46979	4.50561e-08	5.37662e-06	TMEM70	0
chrX_129243836_129245522	22.9951	-1.1862	0.217045	-5.46522	4.62329e-08	5.47381e-06	ELF4	0
chr2_43357980_43361519	83.2263	-0.72194	0.132263	-5.45838	4.80496e-08	5.65879e-06	AC093609.1	-28151
chr9_127020273_127022320	40.8308	-0.964433	0.17683	-5.454	4.92483e-08	5.78466e-06	NEK6	-389
chr9_127020273_127022320.1	40.8308	-0.964433	0.17683	-5.454	4.92483e-08	5.78466e-06	RP11-121A14.2	1116
chr11_3174491_3178053	80.9157	-0.739543	0.135608	-5.45353	4.93791e-08	5.78476e-06	OSBPL5	8532
chr17_74379048_74381252	50.3848	-0.853013	0.156558	-5.44855	5.07815e-08	5.93344e-06	SPHK1	-6307
chr12_125478107_125480175	49.6267	-0.867964	0.159463	-5.44303	5.23808e-08	6.08835e-06	BRI3BP	0
chr19_42027469_42028845	56.9487	-0.775639	0.142879	-5.42864	5.67852e-08	6.53206e-06	AC006129.1	8802
chr18_77438842_77440289	174.324	-0.603787	0.111259	-5.42685	5.73583e-08	6.58098e-06	RP11-567M16.3	0
chr3_13056881_13058181	36.1791	-1.07329	0.197975	-5.42136	5.91472e-08	6.76878e-06	IQSEC1	-20255
chr14_64804811_64805930	33.1325	-1.13691	0.209732	-5.42077	5.93418e-08	6.77363e-06	RP11-544I20.2	0
chr10_91403355_91405626	55.4441	-0.847229	0.156528	-5.41263	6.21064e-08	7.05304e-06	PANK1	0
chr10_91403355_91405626.1	55.4441	-0.847229	0.156528	-5.41263	6.21064e-08	7.05304e-06	RP11-80H5.2	0
chr5_1004697_1005279	13.9916	-1.7089	0.315803	-5.41129	6.25711e-08	7.08773e-06	RP11-43F13.4	0
chr1_45189098_45190656	36.0149	-0.991442	0.183391	-5.40617	6.43867e-08	7.2358e-06	C1orf228	-48714
chr7_138719994_138721115	32.802	-1.01877	0.188459	-5.40578	6.45284e-08	7.2358e-06	ZC3HAV1L	0
chr19_44283291_44284199	21.4034	-1.40205	0.259453	-5.40386	6.52222e-08	7.29522e-06	KCNN4	1211
chr16_85603290_85605782	80.5188	-0.670328	0.124183	-5.3979	6.74249e-08	7.50389e-06	RP11-118F19.1	11396
chr22_20104368_20105836	79.2645	-0.652706	0.120962	-5.39595	6.8161e-08	7.56689e-06	RANBP1	0
chr22_20104368_20105836.1	79.2645	-0.652706	0.120962	-5.39595	6.8161e-08	7.56689e-06	TRMT2A	0
chr1_249152116_249154044	61.8989	-0.745694	0.138594	-5.38043	7.43087e-08	8.10785e-06	AL672294.1	0
chr1_249152116_249154044.1	61.8989	-0.745694	0.138594	-5.38043	7.43087e-08	8.10785e-06	ZNF692	0
chr10_71812565_71814030	28.3744	-1.21319	0.225886	-5.37082	7.83792e-08	8.53106e-06	H2AFY2	-14
chr20_45141568_45142484	23.8117	-1.26272	0.235404	-5.36403	8.13834e-08	8.81495e-06	ZNF334	0
chr5_179232546_179234583	42.8446	-0.911979	0.170117	-5.36088	8.28197e-08	8.92708e-06	MGAT4B	0
chr5_179232546_179234583.1	42.8446	-0.911979	0.170117	-5.36088	8.28197e-08	8.92708e-06	SQSTM1	0
chr13_100632567_100635234	54.3076	-0.79323	0.14827	-5.34991	8.79974e-08	9.39419e-06	ZIC2	0
chr16_88496636_88497581	19.4085	-1.34588	0.251709	-5.34695	8.94478e-08	9.5262e-06	ZNF469	-2758
chr8_10847425_10848962	35.9062	-0.87615	0.164022	-5.34167	9.20949e-08	9.7847e-06	MIR598	43851
chr19_2235675_2237354	77.2532	-0.649289	0.12171	-5.33473	9.56845e-08	1.01419e-05	PLEKHJ1	350
chr19_2235675_2237354.1	77.2532	-0.649289	0.12171	-5.33473	9.56845e-08	1.01419e-05	SF3A2	0
chr8_142427517_142428348	29.6412	-1.10762	0.207942	-5.32656	1.00088e-07	1.05583e-05	PTP4A3	-25425
chr4_1722090_1723521	40.643	-0.935222	0.175633	-5.32486	1.01031e-07	1.06326e-05	TACC3	0
chr4_1722090_1723521.1	40.643	-0.935222	0.175633	-5.32486	1.01031e-07	1.06326e-05	TMEM129	0
chr10_124671215_124671896	21.5472	-1.07267	0.201857	-5.314	1.07246e-07	1.12336e-05	FAM24A	-999
chr19_46271316_46274294	97.5161	-0.643032	0.121025	-5.31322	1.07704e-07	1.1255e-05	AC074212.5	-3274
chr19_46271316_46274294.1	97.5161	-0.643032	0.121025	-5.31322	1.07704e-07	1.1255e-05	AC074212.6	-263
chr19_46271316_46274294.2	97.5161	-0.643032	0.121025	-5.31322	1.07704e-07	1.1255e-05	DMPK	11454
chr19_46271316_46274294.3	97.5161	-0.643032	0.121025	-5.31322	1.07704e-07	1.1255e-05	SIX5	0
chr20_1783416_1784748	43.521	-0.944729	0.17793	-5.30957	1.09887e-07	1.14515e-05	RP5-968J1.1	13505
chr8_11463089_11463925	22.0994	-1.21271	0.228842	-5.29933	1.16231e-07	1.20053e-05	LINC00208	-29268
chr19_7710018_7711210	41.5417	-0.94171	0.177854	-5.29484	1.1912e-07	1.22752e-05	STXBP2	-8020
chr12_98909087_98910802	49.2077	-0.890331	0.16831	-5.28984	1.22424e-07	1.25865e-05	TMPO	0
chr12_98909087_98910802.1	49.2077	-0.890331	0.16831	-5.28984	1.22424e-07	1.25865e-05	TMPO-AS1	0
chr1_26248879_26250207	36.938	-0.991276	0.187456	-5.28806	1.23621e-07	1.26803e-05	AL033528.1	-10640
chr15_91207779_91209335	51.8135	-0.675745	0.128014	-5.27866	1.3013e-07	1.32867e-05	RP11-387D10.2	51038
chr15_91207779_91209335.1	51.8135	-0.675745	0.128014	-5.27866	1.3013e-07	1.32867e-05	RP11-387D10.3	-4315
chr1_211431100_211433336	69.0853	-0.638797	0.12104	-5.27757	1.30911e-07	1.32896e-05	RCOR3	0
chr12_4379901_4381352	35.2831	-0.979982	0.185684	-5.27768	1.30832e-07	1.32896e-05	RP11-264F23.3	3999
chr12_4379901_4381352.1	35.2831	-0.979982	0.185684	-5.27768	1.30832e-07	1.32896e-05	RP11-264F23.4	2880
chr15_31617545_31620806	84.8251	-0.655937	0.124366	-5.27425	1.33298e-07	1.34864e-05	KLF13	0
chr10_102755984_102759569	59.3999	-0.77765	0.147543	-5.27067	1.35929e-07	1.37214e-05	LZTS2	0
chr19_10529874_10531960	54.5055	-0.825875	0.156936	-5.26251	1.42104e-07	1.4219e-05	PDE4A	-2426
chr1_235089966_235091980	52.7222	-0.829613	0.157714	-5.26025	1.43858e-07	1.43591e-05	RP11-443B7.2	998
chr1_234613825_234615058	34.9831	-0.98648	0.188163	-5.24268	1.58261e-07	1.55869e-05	TARBP1	0
chr8_142099384_142100455	43.4103	-0.943801	0.180171	-5.23835	1.62016e-07	1.59216e-05	RP11-128L5.1	-33996
chr5_423844_425688	38.0145	-0.935407	0.178783	-5.23207	1.67619e-07	1.63998e-05	C5orf55	17571
chr17_29034641_29037330	58.2664	-0.75093	0.143853	-5.22011	1.78818e-07	1.73809e-05	RN7SL316P	-4848
chr1_168318148_168318402	40.2232	-1.18746	0.227612	-5.21703	1.81811e-07	1.75681e-05	MIR557	26360
chr8_18244621_18245418	24.3325	-1.08887	0.208708	-5.21719	1.81654e-07	1.75681e-05	NAT2	3337
chr16_87983846_87985689	67.424	-0.663907	0.1274	-5.21121	1.87614e-07	1.8078e-05	BANP	0
chr1_202128370_202131543	67.4637	-0.67119	0.128879	-5.2079	1.90986e-07	1.82842e-05	PTPN7	0
chr16_770487_771807	37.2164	-0.980693	0.188377	-5.20602	1.92937e-07	1.84313e-05	FAM173A	0
chr20_62586876_62588760	59.6746	-0.711048	0.136611	-5.20492	1.94085e-07	1.84617e-05	UCKL1	0
chr20_62586876_62588760.1	59.6746	-0.711048	0.136611	-5.20492	1.94085e-07	1.84617e-05	ZNF512B	91354
chr6_33150650_33151460	17.4837	-1.35423	0.260174	-5.20508	1.93913e-07	1.84617e-05	COL11A2	8817
chr10_49407513_49408069	20.3589	-1.30763	0.251436	-5.20065	1.98594e-07	1.88102e-05	FRMPD2	74845
chr6_89855493_89856712	32.2232	-0.988873	0.19036	-5.19475	2.04991e-07	1.9293e-05	PM20D2	0
chr21_45772645_45775608	79.7146	-0.64136	0.123675	-5.18586	2.15023e-07	2.01097e-05	TRPM2	0
chr15_45458707_45459945	42.0286	-0.803156	0.154947	-5.18342	2.17855e-07	2.03317e-05	CTD-2651B20.1	0
chr15_45458707_45459945.1	42.0286	-0.803156	0.154947	-5.18342	2.17855e-07	2.03317e-05	SHF	20206
chr1_203044380_203045759	34.3974	-0.965131	0.186314	-5.18013	2.21725e-07	2.06497e-05	PPFIA4	-48755
chr17_7787869_7790393	49.2623	-0.765258	0.147831	-5.17656	2.26012e-07	2.1005e-05	CHD3	0
chr17_7787869_7790393.1	49.2623	-0.765258	0.147831	-5.17656	2.26012e-07	2.1005e-05	LSMD1	0
chr2_102090153_102092533	80.424	-0.609485	0.117842	-5.17204	2.31548e-07	2.14299e-05	RFX8	0
chr8_67525133_67526113	60.658	-0.69002	0.133538	-5.16723	2.37584e-07	2.18976e-05	MYBL1	-45940
chr16_2317500_2318932	105.469	-0.607217	0.117543	-5.16593	2.39252e-07	2.20057e-05	AC009065.2	0
chr16_2317500_2318932.1	105.469	-0.607217	0.117543	-5.16593	2.39252e-07	2.20057e-05	RNPS1	0
chr10_5930809_5932588	47.5601	-0.855115	0.165585	-5.16421	2.41457e-07	2.21499e-05	ANKRD16	0
chr10_5930809_5932588.1	47.5601	-0.855115	0.165585	-5.16421	2.41457e-07	2.21499e-05	FBXO18	0
chr16_30075117_30077687	76.9511	-0.64841	0.125614	-5.16192	2.44428e-07	2.23434e-05	ALDOA	0
chr17_1956896_1960097	62.7745	-0.65998	0.127921	-5.1593	2.47878e-07	2.26123e-05	HIC1	0
chr8_130692661_130694516	52.0213	-0.85555	0.165942	-5.15571	2.52675e-07	2.30027e-05	RP11-419K12.1	1410
chr11_59495818_59497055	24.0014	-1.17111	0.227185	-5.15488	2.53796e-07	2.30576e-05	OR10V1	-14481
chr10_94448450_94451760	77.5342	-0.6858	0.13326	-5.14635	2.65608e-07	2.40326e-05	HHEX	0
chr9_139742267_139744301	43.5414	-0.966519	0.187798	-5.1466	2.65248e-07	2.40326e-05	PHPT1	0
chr15_63892398_63893986	37.9975	-0.977025	0.190045	-5.14102	2.73247e-07	2.4574e-05	FBXL22	-2847
chr15_63892398_63893986.1	37.9975	-0.977025	0.190045	-5.14102	2.73247e-07	2.4574e-05	USP3-AS1	0
chr17_79817959_79819503	53.6501	-0.836468	0.162698	-5.14123	2.72945e-07	2.4574e-05	P4HB	0
chr11_355344_356431	38.5742	-0.81818	0.159638	-5.12523	2.97176e-07	2.6406e-05	B4GALNT4	13373
chr19_58897587_58898946	55.3851	-0.73286	0.142982	-5.12553	2.96703e-07	2.6406e-05	MIR4754	0
chr19_58897587_58898946.1	55.3851	-0.73286	0.142982	-5.12553	2.96703e-07	2.6406e-05	RPS5	0
chr20_50807659_50808852	37.2537	-0.927041	0.181035	-5.12077	3.04291e-07	2.69843e-05	ZFP64	0
chr15_66993179_66996449	79.7052	-0.648362	0.126739	-5.11573	3.12533e-07	2.76601e-05	SMAD6	0
chr21_45553066_45554097	31.6444	-0.9761	0.191127	-5.10706	3.27208e-07	2.89014e-05	C21orf33	0
chr14_65170878_65172498	33.7504	-1.05015	0.205877	-5.10084	3.38157e-07	2.96835e-05	PLEKHG3	0
chr17_79980540_79981501	25.3806	-1.16358	0.228147	-5.10014	3.39396e-07	2.96835e-05	LRRC45	0
chr17_79980540_79981501.1	25.3806	-1.16358	0.228147	-5.10014	3.39396e-07	2.96835e-05	STRA13	0
chr2_74756269_74757422	46.8971	-0.788833	0.154658	-5.10048	3.38787e-07	2.96835e-05	AUP1	0
chr2_74756269_74757422.1	46.8971	-0.788833	0.154658	-5.10048	3.38787e-07	2.96835e-05	HTRA2	0
chr7_151572739_151575223	52.4699	-0.814989	0.159858	-5.09822	3.42867e-07	2.98113e-05	PRKAG2	0
chr7_151572739_151575223.1	52.4699	-0.814989	0.159858	-5.09822	3.42867e-07	2.98113e-05	PRKAG2-AS1	0
chr16_85568682_85570385	52.3357	-0.818402	0.160722	-5.09203	3.54257e-07	3.07416e-05	RP11-118F19.1	46793
chr11_126224683_126227390	49.0097	-0.793106	0.155913	-5.08686	3.64032e-07	3.14062e-05	ST3GAL4	0
chr2_219134382_219135433	45.2045	-0.754139	0.148291	-5.08554	3.66587e-07	3.15045e-05	AAMP	0
chr2_219134382_219135433.1	45.2045	-0.754139	0.148291	-5.08554	3.66587e-07	3.15045e-05	PNKD	0
chr6_52929339_52930797	36.5765	-0.922916	0.181473	-5.0857	3.66277e-07	3.15045e-05	FBXO9	0
chr11_64981256_64981996	23.069	-1.21282	0.238536	-5.08443	3.68726e-07	3.16273e-05	SLC22A20	0
chr13_103451192_103453347	50.7838	-0.811786	0.159798	-5.08006	3.77312e-07	3.23015e-05	BIVM	0
chr13_103451192_103453347.1	50.7838	-0.811786	0.159798	-5.08006	3.77312e-07	3.23015e-05	KDELC1	0
chr17_73583796_73585617	52.6258	-0.76751	0.151117	-5.07893	3.79567e-07	3.23701e-05	MYO15B	0
chr10_121301813_121303072	33.9901	-0.970052	0.191406	-5.06802	4.01974e-07	3.41501e-05	RGS10	0
chr21_45284131_45285915	41.4085	-0.835571	0.164895	-5.06731	4.03484e-07	3.42132e-05	AGPAT3	0
chr17_29923257_29924160	24.3884	-1.08507	0.214147	-5.06694	4.04264e-07	3.42141e-05	RP1-41C23.1	-13077
chr13_101240424_101241367	29.454	-1.09733	0.216947	-5.05807	4.23516e-07	3.57754e-05	GGACT	-4173
chr2_10260226_10262879	70.915	-0.645943	0.12784	-5.05273	4.3553e-07	3.67206e-05	RP11-254F7.4	0
chr2_10260226_10262879.1	70.915	-0.645943	0.12784	-5.05273	4.3553e-07	3.67206e-05	RRM2	0
chr22_19841806_19843579	47.0199	-0.809485	0.160266	-5.05087	4.39801e-07	3.70106e-05	C22orf29	0
chr22_19841806_19843579.1	47.0199	-0.809485	0.160266	-5.05087	4.39801e-07	3.70106e-05	GNB1L	0
chr1_54302816_54304536	55.4657	-0.702841	0.139171	-5.05018	4.41388e-07	3.70741e-05	NDC1	0
chr12_24736621_24737433	26.0675	-1.04148	0.206369	-5.04671	4.4949e-07	3.75621e-05	LINC00477	0
chr22_19417803_19420317	65.9367	-0.676177	0.133996	-5.04625	4.50573e-07	3.75621e-05	HIRA	0
chr22_19417803_19420317.1	65.9367	-0.676177	0.133996	-5.04625	4.50573e-07	3.75621e-05	MRPL40	0
chr5_177630911_177632454	33.8529	-0.941441	0.186705	-5.04239	4.59757e-07	3.82561e-05	HNRNPAB	0
chr11_910462_912134	41.6345	-0.848543	0.168623	-5.0322	4.84883e-07	4.00473e-05	CHID1	2925
chr16_89006641_89010103	57.7143	-0.736157	0.146338	-5.03052	4.89139e-07	4.03066e-05	CBFA2T3	33510
chr16_89006641_89010103.1	57.7143	-0.736157	0.146338	-5.03052	4.89139e-07	4.03066e-05	RP11-830F9.6	-445
chr2_8824957_8826243	25.057	-1.18206	0.235206	-5.02564	5.01767e-07	4.12125e-05	ID2	-5983
chr10_26985881_26987564	42.2391	-0.880652	0.175343	-5.02244	5.10179e-07	4.16728e-05	PDSS1	0
chr3_17783153_17784594	49.7615	-0.792978	0.15809	-5.016	5.27596e-07	4.30164e-05	TBC1D5	701716
chr6_170402426_170405194	64.8783	-0.702392	0.140154	-5.01157	5.39878e-07	4.39374e-05	RP11-302L19.1	72547
chr4_1713346_1714987	68.4367	-0.625726	0.124971	-5.00695	5.52984e-07	4.484e-05	RP11-572O17.1	0
chr4_1713346_1714987.1	68.4367	-0.625726	0.124971	-5.00695	5.52984e-07	4.484e-05	SLBP	0
chr8_102120729_102122364	45.7334	-0.926575	0.185049	-5.00719	5.52309e-07	4.484e-05	KB-1460A1.1	16023
chr2_220435346_220436459	22.1806	-1.16329	0.232362	-5.00637	5.54649e-07	4.48933e-05	INHA	-1463
chr2_220435346_220436459.1	22.1806	-1.16329	0.232362	-5.00637	5.54649e-07	4.48933e-05	OBSL1	123
chr1_226309218_226310581	32.3093	-0.989206	0.19783	-5.00028	5.72484e-07	4.60855e-05	RP11-275I14.4	25123
chr3_17979774_17983181	72.4338	-0.657158	0.131441	-4.99965	5.74355e-07	4.6145e-05	TBC1D5	503129
chrX_108867288_108868784	19.229	-1.29543	0.25912	-4.99933	5.75296e-07	4.6145e-05	KCNE1L	0
chr19_14359510_14360560	23.8699	-1.27462	0.25526	-4.9934	5.93268e-07	4.7246e-05	CTD-2189E23.2	19630
chr19_46996425_46997163	20.4307	-1.24814	0.250049	-4.99159	5.98834e-07	4.76041e-05	PNMAL2	2593
chr19_46996425_46997163.1	20.4307	-1.24814	0.250049	-4.99159	5.98834e-07	4.76041e-05	PPP5D1	107295
chr5_137089009_137091060	72.7722	-0.628937	0.126476	-4.97276	6.60059e-07	5.23776e-05	HNRNPA0	0
chr2_238438060_238440082	39.5743	-0.850273	0.171276	-4.96435	6.89318e-07	5.45051e-05	MLPH	-43008
chr22_50699159_50700450	28.4536	-1.07756	0.217475	-4.95486	7.23811e-07	5.68287e-05	MAPK12	0
chr2_113402762_113404152	44.4469	-0.906787	0.183527	-4.94089	7.7767e-07	6.06297e-05	AC079922.3	0
chr2_113402762_113404152.1	44.4469	-0.906787	0.183527	-4.94089	7.7767e-07	6.06297e-05	SLC20A1	0
chr3_128321732_128323341	49.3335	-0.823494	0.166814	-4.9366	7.94976e-07	6.17746e-05	C3orf27	-26803
chr4_1241319_1243842	62.0245	-0.619186	0.125497	-4.93388	8.06107e-07	6.25182e-05	CTBP1	0
chr4_1241319_1243842.1	62.0245	-0.619186	0.125497	-4.93388	8.06107e-07	6.25182e-05	CTBP1-AS2	0
chr17_80709187_80710472	45.5095	-0.822796	0.166946	-4.92851	8.2861e-07	6.40404e-05	TBCD	0
chr17_1131586_1133423	41.2886	-0.943712	0.191683	-4.92331	8.50945e-07	6.54258e-05	AC144836.1	23872
chr1_156736656_156737923	67.9783	-0.624761	0.126989	-4.9198	8.66319e-07	6.63785e-05	HDGF	0
chr1_156736656_156737923.1	67.9783	-0.624761	0.126989	-4.9198	8.66319e-07	6.63785e-05	PRCC	-16255
chr1_156710493_156711495	62.8082	-0.598521	0.121749	-4.91602	8.83211e-07	6.75565e-05	MRPL24	0
chr3_194979943_194981200	43.3527	-0.828772	0.168642	-4.91439	8.9061e-07	6.78327e-05	ACAP2-IT1	22271
chr17_3866629_3868974	48.873	-0.797441	0.162294	-4.91357	8.94349e-07	6.79415e-05	ATP2A3	0
chr2_43437239_43438513	70.2679	-0.757083	0.154118	-4.91237	8.9983e-07	6.82415e-05	ZFP36L2	15236
chr18_9954_10612	32.0602	-1.03554	0.210887	-4.91037	9.09033e-07	6.87053e-05	AP005530.1	579
chr16_15149611_15150354	45.0275	-0.686882	0.139915	-4.90928	9.14112e-07	6.89721e-05	NTAN1	0
chr16_15149611_15150354.1	45.0275	-0.686882	0.139915	-4.90928	9.14112e-07	6.89721e-05	PDXDC1	-81164
chr4_174088993_174091448	48.5121	-0.783762	0.159687	-4.90812	9.19526e-07	6.91462e-05	GALNT7	0
chr4_174088993_174091448.1	48.5121	-0.783762	0.159687	-4.90812	9.19526e-07	6.91462e-05	RP11-10K16.1	0
chr9_66458001_66458848	84.6344	-0.603566	0.123058	-4.90474	9.35495e-07	7.02284e-05	RNA5SP283	0
chr9_66458001_66458848.1	84.6344	-0.603566	0.123058	-4.90474	9.35495e-07	7.02284e-05	RP11-262H14.1	-713
chr10_13389176_13391280	53.686	-0.769471	0.156927	-4.90338	9.42011e-07	7.05985e-05	SEPHS1	0
chr1_107598949_107600309	33.1927	-0.881081	0.180129	-4.89138	1.0013e-06	7.46646e-05	PRMT6	0
chr19_10340900_10342419	40.4128	-1.02563	0.209819	-4.88818	1.01775e-06	7.57642e-05	MIR4322	0
chr19_10340900_10342419.1	40.4128	-1.02563	0.209819	-4.88818	1.01775e-06	7.57642e-05	S1PR2	0
chr9_139979704_139981942	65.8368	-0.665407	0.136163	-4.88683	1.0247e-06	7.61548e-05	AL807752.1	0
chr9_139979704_139981942.1	65.8368	-0.665407	0.136163	-4.88683	1.0247e-06	7.61548e-05	MAN1B1	0
chr22_43525066_43526251	30.275	-1.2345	0.252771	-4.88388	1.04021e-06	7.70496e-05	BIK	-18313
chr2_87623813_87624025	31.9045	-1.16735	0.239108	-4.8821	1.04964e-06	7.74903e-05	IGKV3OR2-268	-58180
chr16_75031834_75034055	39.8426	-0.85983	0.176173	-4.88059	1.05767e-06	7.79541e-05	ZNRF1	0
chr11_69009733_69010312	13.547	-1.66556	0.341506	-4.87711	1.0765e-06	7.92112e-05	MYEOV	51293
chr11_57243490_57244546	22.6281	-1.13416	0.232849	-4.8708	1.11145e-06	8.15128e-05	RP11-624G17.3	462
chr4_2470099_2471801	43.2865	-0.758517	0.155753	-4.87001	1.1159e-06	8.1705e-05	RNF4	0
chr3_48228617_48230499	43.8424	-0.851462	0.17506	-4.86383	1.15136e-06	8.38869e-05	CDC25A	0
chr1_27960443_27961272	19.8135	-1.32615	0.2728	-4.86126	1.16642e-06	8.4569e-05	FGR	517
chr5_66461758_66462982	23.7892	-1.0851	0.223199	-4.86158	1.16455e-06	8.4569e-05	MAST4	-569570
chr2_37898036_37900184	51.4598	-0.68554	0.14117	-4.85612	1.19705e-06	8.66492e-05	CDC42EP3	0
chr17_18161196_18162314	31.688	-0.924587	0.19048	-4.85399	1.21003e-06	8.74466e-05	FLII	0
chr4_121843128_121844160	25.2233	-1.17258	0.241637	-4.85267	1.21807e-06	8.78754e-05	PRDM5	0
chr10_80826693_80830931	78.1932	-0.639123	0.131887	-4.84601	1.25972e-06	9.04499e-05	ZMIZ1	0
chr10_80826693_80830931.1	78.1932	-0.639123	0.131887	-4.84601	1.25972e-06	9.04499e-05	ZMIZ1-AS1	0
chr19_44258490_44259990	64.8523	-0.641987	0.132617	-4.84091	1.29248e-06	9.2504e-05	SMG9	0
chr16_30913332_30916074	71.7401	-0.58677	0.121227	-4.84026	1.29668e-06	9.26554e-05	CTF1	-5405
chr16_576951_579133	72.385	-0.630787	0.130378	-4.83812	1.31073e-06	9.32102e-05	CAPN15	0
chr15_31507678_31509163	49.7968	-0.73291	0.151567	-4.83556	1.32773e-06	9.42691e-05	RP11-16E12.1	0
chr11_6440253_6440866	15.2658	-1.45819	0.301692	-4.83338	1.34232e-06	9.51532e-05	APBB1	0
chr9_114748678_114751425	79.0321	-0.624874	0.129351	-4.83085	1.35954e-06	9.59157e-05	RNU6-710P	7595
chr22_37256719_37258817	52.2251	-0.68312	0.14144	-4.82976	1.36697e-06	9.62867e-05	CTA-833B7.2	7667
chr22_37256719_37258817.1	52.2251	-0.68312	0.14144	-4.82976	1.36697e-06	9.62867e-05	NCF4	0
chr19_10304848_10305924	63.4125	-0.786097	0.16301	-4.8224	1.41845e-06	9.94409e-05	DNMT1	0
chr8_66752994_66755268	124.909	-0.592209	0.122835	-4.82117	1.42721e-06	9.97412e-05	CTD-2532N20.1	0
chr8_66752994_66755268.1	124.909	-0.592209	0.122835	-4.82117	1.42721e-06	9.97412e-05	PDE7A	0
chr6_37136365_37140178	81.3834	-0.596158	0.123826	-4.8145	1.47572e-06	0.000102809	PIM1	0
chr19_5622381_5623630	71.0599	-0.626042	0.130215	-4.80777	1.52627e-06	0.000105833	SAFB	0
chr19_5622381_5623630.1	71.0599	-0.626042	0.130215	-4.80777	1.52627e-06	0.000105833	SAFB2	0
chr18_48493843_48494920	31.952	-0.923403	0.192219	-4.8039	1.55603e-06	0.000107299	ELAC1	0
chr18_48493843_48494920.1	31.952	-0.923403	0.192219	-4.8039	1.55603e-06	0.000107299	RP11-729L2.2	0
chr2_182321285_182323897	64.6094	-0.708952	0.147563	-4.8044	1.55217e-06	0.000107299	ITGA4	0
chr8_97505765_97507715	62.6129	-0.719477	0.149797	-4.80303	1.56285e-06	0.000107532	RNU6-1172P	-62377
chr7_73015029_73015616	13.2378	-1.50392	0.313187	-4.80198	1.57106e-06	0.000107931	MLXIPL	23255
chr8_130593706_130596118	86.983	-0.600332	0.125104	-4.79866	1.59733e-06	0.00010956	CCDC26	96368
chr19_662182_663823	70.5028	-0.599443	0.12506	-4.79323	1.64114e-06	0.000112201	AC004156.3	0
chr19_662182_663823.1	70.5028	-0.599443	0.12506	-4.79323	1.64114e-06	0.000112201	RNF126	0
chr7_29723960_29725477	31.9001	-0.973844	0.203182	-4.79297	1.64331e-06	0.000112201	AC007276.5	0
chr7_29723960_29725477.1	31.9001	-0.973844	0.203182	-4.79297	1.64331e-06	0.000112201	ZNRF2P2	0
chr17_73892331_73893228	31.4072	-0.964642	0.201291	-4.79227	1.64902e-06	0.000112419	RP11-552F3.10	0
chr17_73892331_73893228.1	31.4072	-0.964642	0.201291	-4.79227	1.64902e-06	0.000112419	TRIM65	0
chr22_50963678_50965964	64.599	-0.631287	0.13182	-4.78901	1.67609e-06	0.00011409	SCO2	0
chr22_50963678_50965964.1	64.599	-0.631287	0.13182	-4.78901	1.67609e-06	0.00011409	TYMP	2522
chr10_80122124_80122629	10.8142	-1.56454	0.326893	-4.78609	1.7006e-06	0.000115405	SNORA71	4635
chr3_10501646_10502650	24.1792	-0.917785	0.191844	-4.78401	1.71829e-06	0.000116428	ATP2B2	247067
chr18_11980257_11982410	57.9541	-0.685458	0.143344	-4.78192	1.73632e-06	0.000117471	IMPA2	0
chr19_17346198_17347035	25.8734	-1.11155	0.232755	-4.77563	1.79143e-06	0.000121015	AC010646.3	19223
chr19_17346198_17347035.1	25.8734	-1.11155	0.232755	-4.77563	1.79143e-06	0.000121015	NR2F6	9715
chr10_126431642_126433517	35.0832	-0.90834	0.190238	-4.77474	1.79938e-06	0.000121275	FAM53B	0
chr10_126431642_126433517.1	35.0832	-0.90834	0.190238	-4.77474	1.79938e-06	0.000121275	RP11-12J10.3	46780
chr22_17565473_17566833	32.1586	-0.999862	0.20982	-4.76534	1.88537e-06	0.000126402	IL17RA	0
chr8_142401880_142402735	22.7114	-1.25481	0.263619	-4.75994	1.93653e-06	0.000129637	CTD-3064M3.4	0
chr8_142401880_142402735.1	22.7114	-1.25481	0.263619	-4.75994	1.93653e-06	0.000129637	PTP4A3	0
chr17_60729189_60730864	53.6164	-0.701185	0.147367	-4.75808	1.95443e-06	0.000130373	MRC2	-24428
chr19_55663292_55663756	12.217	-1.69352	0.355962	-4.75758	1.95924e-06	0.000130373	TNNI3	5345
chr12_751388_753278	46.1496	-0.748542	0.157485	-4.75311	2.00307e-06	0.000132561	NINJ2	19668
chr12_751388_753278.1	46.1496	-0.748542	0.157485	-4.75311	2.00307e-06	0.000132561	RP11-218M22.1	-11332
chr2_220040709_220043497	68.7898	-0.61865	0.130195	-4.75172	2.01691e-06	0.000133215	CNPPD1	0
chr2_220040709_220043497.1	68.7898	-0.61865	0.130195	-4.75172	2.01691e-06	0.000133215	FAM134A	0
chr2_131129223_131130422	36.0123	-0.880486	0.185388	-4.74942	2.03998e-06	0.000134539	PTPN18	-15644
chr17_79798689_79800321	40.6457	-0.819334	0.17254	-4.74866	2.0477e-06	0.000134849	RP11-498C9.2	720
chr1_156460091_156464793	135.136	-0.640513	0.13506	-4.74242	2.11175e-06	0.000138656	MEF2D	5828
chr11_73095993_73097451	40.7346	-0.893292	0.188358	-4.74252	2.11079e-06	0.000138656	RELT	-8685
chr1_161695641_161697664	46.2294	-0.805461	0.169881	-4.74133	2.12315e-06	0.000139199	FCRLB	-4289
chr19_40136099_40136948	28.7216	-0.855041	0.180676	-4.73245	2.21828e-06	0.000145009	AC005176.2	-6775
chr19_1875649_1876405	36.7076	-0.875169	0.185006	-4.73048	2.2399e-06	0.000145993	CTB-31O20.2	0
chr19_1875649_1876405.1	36.7076	-0.875169	0.185006	-4.73048	2.2399e-06	0.000145993	CTB-31O20.9	-635
chr19_38754571_38756151	45.207	-0.824477	0.174606	-4.72193	2.33616e-06	0.000151823	SPINT2	0
chr5_87970019_87971953	31.5333	-0.968986	0.205354	-4.71862	2.37451e-06	0.00015409	CTC-467M3.1	83
chr14_50064495_50066798	69.1654	-0.626276	0.132886	-4.71287	2.44255e-06	0.000157587	AL139099.1	0
chr14_50064495_50066798.1	69.1654	-0.626276	0.132886	-4.71287	2.44255e-06	0.000157587	RPS29	0
chr6_2764819_2766756	71.1731	-0.609	0.129419	-4.70565	2.53054e-06	0.000162792	WRNIP1	0
chr16_21610430_21611549	32.0453	-0.941316	0.200172	-4.70253	2.56962e-06	0.000165068	METTL9	-1892
chr5_43556220_43557550	40.1987	-0.800194	0.170235	-4.70053	2.59484e-06	0.000166448	PAIP1	248
chr17_47438788_47439997	36.1844	-0.910271	0.193706	-4.69925	2.61121e-06	0.000167016	RP11-1079K10.3	0
chr17_47438788_47439997.1	36.1844	-0.910271	0.193706	-4.69925	2.61121e-06	0.000167016	ZNF652	0
chr13_105924790_105925775	24.7462	-1.12249	0.238892	-4.69873	2.61778e-06	0.000167196	DAOA	192817
chr15_40574206_40575365	21.9803	-1.16173	0.247326	-4.69715	2.63813e-06	0.000168113	ANKRD63	0
chr10_97802906_97804814	47.9978	-0.73944	0.157914	-4.68255	2.83329e-06	0.000179672	CCNJ	0
chr10_97802906_97804814.1	47.9978	-0.73944	0.157914	-4.68255	2.83329e-06	0.000179672	ENTPD1-AS1	45182
chr17_79988560_79990129	25.4577	-1.14081	0.243718	-4.68086	2.85674e-06	0.000180901	LRRC45	-7383
chr17_79988560_79990129.1	25.4577	-1.14081	0.243718	-4.68086	2.85674e-06	0.000180901	RAC3	0
chr11_68610840_68611700	18.7551	-1.36584	0.291936	-4.67857	2.88887e-06	0.000182676	RP11-757G1.6	26432
chr19_41858307_41860289	70.5395	-0.652773	0.139884	-4.66654	3.06319e-06	0.000192877	CTC-435M10.3	-1550
chr19_41858307_41860289.1	70.5395	-0.652773	0.139884	-4.66654	3.06319e-06	0.000192877	TGFB1	0
chr19_41858307_41860289.2	70.5395	-0.652773	0.139884	-4.66654	3.06319e-06	0.000192877	TMEM91	-1492
chr13_115046051_115048003	59.3758	-0.634267	0.135938	-4.66586	3.07336e-06	0.000193244	UPF3A	0
chr5_148667885_148668563	18.3097	-1.13423	0.243472	-4.65856	3.18421e-06	0.000199089	AFAP1L1	-16452
chr20_31070282_31072347	37.1952	-0.969298	0.208113	-4.65755	3.19997e-06	0.000199794	C20orf112	100284
chr2_172015548_172017786	47.7391	-0.760442	0.163324	-4.65603	3.22366e-06	0.00020071	TLK1	70039
chr2_130938850_130940477	72.3068	-0.714727	0.153517	-4.6557	3.22889e-06	0.000200755	MZT2B	0
chr2_130938850_130940477.1	72.3068	-0.714727	0.153517	-4.6557	3.22889e-06	0.000200755	SMPD4	0
chr8_92692900_92693423	17.8339	-1.21774	0.261657	-4.65397	3.25608e-06	0.000202107	RP11-122C21.1	226259
chr17_17108758_17110268	47.9378	-0.796135	0.171159	-4.65143	3.29634e-06	0.00020381	PLD6	0
chr17_17108758_17110268.1	47.9378	-0.796135	0.171159	-4.65143	3.29634e-06	0.00020381	RP11-45M22.4	30232
chr16_49191817_49192415	17.7094	-1.07934	0.232165	-4.64902	3.33513e-06	0.000205922	RP11-22D3.1	1004
chr8_135421606_135422345	26.6054	-0.869722	0.18716	-4.64695	3.36883e-06	0.000207655	RP11-513H8.1	-88916
chr1_182359850_182362392	65.581	-0.638441	0.137428	-4.64565	3.3901e-06	0.000208449	GLUL	0
chr16_1820437_1823919	69.2827	-0.628707	0.135362	-4.64465	3.4066e-06	0.000209125	EME2	0
chr16_1820437_1823919.1	69.2827	-0.628707	0.135362	-4.64465	3.4066e-06	0.000209125	MRPS34	0
chr16_1820437_1823919.2	69.2827	-0.628707	0.135362	-4.64465	3.4066e-06	0.000209125	NME3	0
chr8_145747314_145748725	85.3956	-0.710762	0.153045	-4.64413	3.41519e-06	0.000209125	LRRC14	-3926
chr8_145747314_145748725.1	85.3956	-0.710762	0.153045	-4.64413	3.41519e-06	0.000209125	LRRC24	3692
chr3_129311283_129313203	46.8026	-0.772912	0.166474	-4.64284	3.43653e-06	0.000210143	RN7SL752P	-1092
chr19_10049241_10050465	19.2732	-1.14255	0.246124	-4.64216	3.44779e-06	0.000210542	OLFM2	-2013
chr22_21310691_21312695	43.0728	-0.807377	0.173955	-4.64128	3.46249e-06	0.000211125	XXbac-B135H6.15	0
chr20_62257501_62258915	33.9784	-0.929371	0.200289	-4.64015	3.4815e-06	0.00021173	CTD-3184A7.4	0
chr20_62257501_62258915.1	33.9784	-0.929371	0.200289	-4.64015	3.4815e-06	0.00021173	GMEB2	0
chr17_7017924_7019497	39.2476	-0.859235	0.185276	-4.63759	3.52499e-06	0.000213209	ASGR2	0
chr13_114895795_114898367	57.8067	-0.662026	0.142779	-4.63671	3.54001e-06	0.000213827	RASA3	0
chr5_178012465_178012842	35.59	-1.04153	0.224664	-4.63595	3.55307e-06	0.000214325	COL23A1	-22738
chr18_5542229_5544181	33.8592	-0.84802	0.183123	-4.63087	3.64136e-06	0.000219354	EPB41L3	100
chr19_17355906_17357638	58.3905	-0.650175	0.140413	-4.63045	3.64874e-06	0.000219501	AC010646.3	8620
chr19_17355906_17357638.1	58.3905	-0.650175	0.140413	-4.63045	3.64874e-06	0.000219501	NR2F6	0
chr20_44518870_44520244	31.9312	-0.921931	0.19921	-4.62793	3.6934e-06	0.000221888	CTSA	0
chr20_44518870_44520244.1	31.9312	-0.921931	0.19921	-4.62793	3.6934e-06	0.000221888	NEURL2	0
chr17_79360486_79361471	22.0293	-1.28108	0.276955	-4.62561	3.73493e-06	0.000224081	RP11-1055B8.4	2586
chr3_52007575_52010230	50.3728	-0.744676	0.161044	-4.62405	3.76314e-06	0.000225469	ABHD14A	0
chr3_52007575_52010230.1	50.3728	-0.744676	0.161044	-4.62405	3.76314e-06	0.000225469	ABHD14A-ACY1	0
chr3_52007575_52010230.2	50.3728	-0.744676	0.161044	-4.62405	3.76314e-06	0.000225469	ABHD14B	7196
chr3_52007575_52010230.3	50.3728	-0.744676	0.161044	-4.62405	3.76314e-06	0.000225469	RP11-155D18.12	0
chr3_52007575_52010230.4	50.3728	-0.744676	0.161044	-4.62405	3.76314e-06	0.000225469	RP11-155D18.14	0
chr5_134787291_134788438	27.4744	-1.0544	0.228158	-4.62136	3.81226e-06	0.000227799	CTB-138E5.1	-989
chr5_134787291_134788438.1	27.4744	-1.0544	0.228158	-4.62136	3.81226e-06	0.000227799	TIFAB	0
chr11_68595616_68596589	26.1976	-1.08175	0.234338	-4.61618	3.90861e-06	0.00023262	CPT1A	-28880
chr16_67062387_67064180	50.2159	-0.680761	0.147508	-4.61507	3.9296e-06	0.000233557	RN7SL543P	-8966
chr16_446815_447872	28.2195	-0.942077	0.204184	-4.61385	3.95273e-06	0.000234618	NME4	-91
chr12_2985671_2987975	54.9283	-0.656138	0.142541	-4.60315	4.16155e-06	0.000246029	FOXM1	0
chr12_2985671_2987975.1	54.9283	-0.656138	0.142541	-4.60315	4.16155e-06	0.000246029	RHNO1	0
chr17_60703938_60706510	51.2515	-0.701945	0.152641	-4.59867	4.25188e-06	0.000251036	MRC2	0
chr19_18343780_18344757	29.0923	-0.831517	0.180839	-4.5981	4.26369e-06	0.0002514	PDE4C	21473
chr11_503245_504924	45.9495	-0.751399	0.163435	-4.59755	4.27494e-06	0.00025173	RNH1	2377
chr20_277643_279160	49.9033	-0.676164	0.14709	-4.59694	4.28734e-06	0.000251793	ZCCHC3	0
chr2_96873387_96874940	40.0778	-0.866115	0.188617	-4.59192	4.39177e-06	0.00025691	AC012307.3	0
chr2_96873387_96874940.1	40.0778	-0.866115	0.188617	-4.59192	4.39177e-06	0.00025691	STARD7	0
chr9_131182449_131184242	32.6243	-0.990103	0.215698	-4.59022	4.42785e-06	0.000258341	CERCAM	-8405
chr9_115893652_115894632	19.4829	-1.10648	0.241146	-4.58844	4.4656e-06	0.000259863	FAM225A	-18300
chr19_15880345_15880820	11.7874	-1.53753	0.335189	-4.58705	4.49552e-06	0.000260922	LLNLR-249E10.1	-9161
chr1_155157455_155158071	13.6603	-1.34626	0.293968	-4.57961	4.65838e-06	0.000269671	RP11-201K10.3	1678
chr16_58426131_58426957	29.5546	-0.941196	0.205589	-4.57804	4.69356e-06	0.000271355	GINS3	-97112
chr17_77774442_77775845	27.9327	-1.05311	0.230118	-4.5764	4.73041e-06	0.000273131	CBX8	0
chr17_77774442_77775845.1	27.9327	-1.05311	0.230118	-4.5764	4.73041e-06	0.000273131	RP11-353N14.1	-46
chr10_99473315_99474657	29.2915	-0.946147	0.206771	-4.57582	4.74366e-06	0.000273541	MARVELD1	0
chr20_62693992_62694857	30.06	-0.925873	0.20236	-4.57537	4.75386e-06	0.000273775	TCEA2	-5347
chr19_46404656_46406565	75.23	-0.592161	0.129492	-4.57296	4.80892e-06	0.000276231	MYPOP	0
chr4_111117310_111118656	25.1865	-1.08079	0.236379	-4.5723	4.82395e-06	0.000276737	ELOVL6	1177
chr17_81036925_81039119	37.8811	-0.873433	0.191121	-4.57004	4.87628e-06	0.000279379	METRNL	0
chr2_136287856_136289649	45.7463	-0.839845	0.183822	-4.56879	4.90554e-06	0.000280694	ZRANB3	0
chr19_12895934_12897764	64.811	-0.595019	0.130273	-4.56748	4.93627e-06	0.00028209	CTD-2659N19.9	-19
chr21_44850227_44850754	14.9969	-1.45812	0.319393	-4.56529	4.98795e-06	0.000284678	SIK1	-3219
chr6_160209912_160212360	59.431	-0.7079	0.155356	-4.55664	5.19783e-06	0.000295519	MRPL18	0
chr6_160209912_160212360.1	59.431	-0.7079	0.155356	-4.55664	5.19783e-06	0.000295519	TCP1	0
chr1_25174519_25175385	42.8553	-0.807843	0.177351	-4.55506	5.23698e-06	0.00029732	RNU6-1208P	-70049
chr7_27212639_27213745	24.2637	-0.998346	0.219184	-4.55483	5.24285e-06	0.00029732	RP1-170O19.20	5888
chr11_32112384_32113634	30.5142	-0.797432	0.175092	-4.55436	5.2546e-06	0.000297607	RCN1	-274453
chr11_75062254_75063639	33.0577	-0.903553	0.198543	-4.55091	5.34142e-06	0.00030214	ARRB1	0
chr19_4909266_4911412	61.028	-0.666565	0.146583	-4.54734	5.43275e-06	0.000306527	UHRF1	-6175
chr8_142129215_142130193	42.0357	-0.742458	0.163302	-4.54653	5.45364e-06	0.000307316	DENND3	8518
chr5_149109696_149111735	42.7196	-0.762941	0.167839	-4.54567	5.4761e-06	0.000308192	PPARGC1B	0
chr18_72920449_72922813	62.0884	-0.616886	0.135829	-4.54164	5.58171e-06	0.000313343	TSHZ1	0
chr2_241563715_241566729	59.9633	-0.667432	0.146985	-4.54082	5.60366e-06	0.000313784	GPR35	-18868
chr19_45681109_45683112	74.4593	-0.621616	0.136903	-4.54055	5.61085e-06	0.000313792	AC005779.2	0
chr19_45681109_45683112.1	74.4593	-0.621616	0.136903	-4.54055	5.61085e-06	0.000313792	TRAPPC6A	0
chr10_99815502_99816171	16.7838	-1.10026	0.24237	-4.53961	5.6358e-06	0.000314397	CRTAC1	-24917
chr17_77817060_77818306	24.5652	-1.08155	0.238401	-4.53669	5.71442e-06	0.000318384	CBX4	-3832
chr7_191830_193644	38.1989	-0.845348	0.186442	-4.5341	5.78485e-06	0.000321905	AC093627.12	537
chr15_43477301_43478008	23.2904	-0.886993	0.195711	-4.53215	5.83866e-06	0.000324089	CCNDBP1	0
chr15_43477301_43478008.1	23.2904	-0.886993	0.195711	-4.53215	5.83866e-06	0.000324089	EPB42	35474
chr15_43477301_43478008.2	23.2904	-0.886993	0.195711	-4.53215	5.83866e-06	0.000324089	RP11-473C18.3	0
chr15_43477301_43478008.3	23.2904	-0.886993	0.195711	-4.53215	5.83866e-06	0.000324089	TMEM62	-51580
chr5_957350_958385	23.9504	-1.0935	0.241275	-4.53216	5.83824e-06	0.000324089	RP11-661C8.2	-10921
chr2_43019009_43020087	23.5882	-1.06829	0.235729	-4.53185	5.84681e-06	0.000324138	HAAO	0
chrX_17755030_17755653	62.0376	-0.765539	0.169005	-4.52968	5.90717e-06	0.000327077	SCML1	0
chr19_3785160_3786463	35.4213	-0.879383	0.194222	-4.52772	5.96226e-06	0.000329307	MATK	15348
chr6_28889950_28892078	46.7363	-0.763276	0.168574	-4.52785	5.9586e-06	0.000329307	TRIM27	0
chr21_47743529_47745282	52.2834	-0.715648	0.15839	-4.51827	6.23471e-06	0.000343079	PCNT	0
chr19_16987575_16988789	36.5213	-0.91356	0.202213	-4.51781	6.24833e-06	0.000343403	SIN3B	-47365
chr19_18134502_18135065	19.1973	-1.27777	0.283089	-4.51367	6.37149e-06	0.00034931	CTB-52I2.4	-1291
chr1_974013_976752	53.8294	-0.717688	0.15912	-4.51035	6.47209e-06	0.000353953	AGRN	-18511
chr12_106532399_106533940	39.8999	-0.765191	0.169702	-4.50902	6.51289e-06	0.000355747	NUAK1	0
chr1_9711464_9715572	82.0527	-0.585131	0.12987	-4.50552	6.62106e-06	0.000360986	C1orf200	0
chr1_9711464_9715572.1	82.0527	-0.585131	0.12987	-4.50552	6.62106e-06	0.000360986	PIK3CD	0
chr2_238440625_238441729	33.9992	-0.910492	0.202089	-4.50539	6.62502e-06	0.000360986	MLPH	-45573
chr7_132824083_132824804	12.4819	-1.3628	0.302523	-4.50476	6.64482e-06	0.000361623	U6	-56495
chr4_55524279_55525362	24.4183	-1.15378	0.256413	-4.49971	6.80478e-06	0.000369425	KIT	-195
chr11_73018227_73020355	44.5205	-0.770552	0.171301	-4.49822	6.85242e-06	0.000371516	ARHGEF17	0
chr11_73018227_73020355.1	44.5205	-0.770552	0.171301	-4.49822	6.85242e-06	0.000371516	RP11-800A3.7	52
chr20_304752_308079	69.7414	-0.656319	0.14602	-4.49474	6.96556e-06	0.000376318	RP5-1103G7.4	20790
chr20_304752_308079.1	69.7414	-0.656319	0.14602	-4.49474	6.96556e-06	0.000376318	SOX12	0
chr1_51425608_51426261	43.1797	-0.979386	0.217929	-4.49406	6.98795e-06	0.000376613	FAF1	0
chr19_29820350_29820838	12.0585	-1.33742	0.297595	-4.49411	6.98613e-06	0.000376613	CTC-525D6.1	195822
chr20_17511491_17512497	29.353	-0.944614	0.210227	-4.4933	7.01287e-06	0.000377499	BFSP1	37369
chr15_22892298_22893295	18.5994	-1.19352	0.265663	-4.4926	7.03585e-06	0.000378279	CYFIP1	0
chr7_73630548_73632640	51.671	-0.736691	0.164046	-4.49076	7.09702e-06	0.000381108	LAT2	-6823
chr8_86556480_86556812	15.6348	-1.70276	0.38007	-4.48012	7.46011e-06	0.00039932	REXO1L1	18915
chr19_7574432_7575138	21.7754	-0.962045	0.214908	-4.47655	7.58579e-06	0.000405398	CTD-2207O23.12	-2465
chr9_131872835_131874326	52.1541	-0.840888	0.187901	-4.47515	7.63564e-06	0.000407573	CRAT	0
chr9_131872835_131874326.1	52.1541	-0.840888	0.187901	-4.47515	7.63564e-06	0.000407573	PPP2R4	0
chr3_129324203_129325937	24.8658	-1.13844	0.254477	-4.47366	7.68932e-06	0.000408742	RN7SL752P	-14012
chr9_25677334_25678714	38.9912	-0.770633	0.172329	-4.47187	7.75389e-06	0.000411418	TUSC1	143
chr22_46431411_46432252	66.7893	-0.691792	0.15477	-4.46979	7.82959e-06	0.00041494	LINC00899	8482
chr6_110576478_110576981	10.8784	-1.57422	0.352289	-4.46853	7.87591e-06	0.000416899	METTL24	102495
chr22_46392151_46393839	32.0854	-0.948512	0.212511	-4.46337	8.0682e-06	0.000424553	CITF22-92A6.1	15647
chr19_5977513_5978627	59.2833	-0.615757	0.138174	-4.45641	8.33452e-06	0.000437533	CTC-232P5.1	0
chr19_5977513_5978627.1	59.2833	-0.615757	0.138174	-4.45641	8.33452e-06	0.000437533	RANBP3	0
chr3_9956794_9957936	27.8313	-0.964551	0.216503	-4.45514	8.3838e-06	0.000439457	IL17RE	-12492
chr7_27239736_27241388	31.0656	-0.931258	0.209038	-4.45496	8.39091e-06	0.000439457	HOTTIP	-1543
chr2_27341083_27342150	22.2824	-1.20242	0.270176	-4.45053	8.56603e-06	0.000447575	CGREF1	0
chr1_112714813_112715439	17.6175	-1.07935	0.242978	-4.44218	8.90513e-06	0.000463119	snoU13	22685
chr7_150754894_150757050	60.0903	-0.665131	0.149801	-4.44009	8.99206e-06	0.000467094	CDK5	0
chr6_41908529_41910173	36.538	-0.831055	0.187358	-4.43565	9.17942e-06	0.000475716	CCND3	107923
chr10_76584466_76586955	59.4135	-0.68342	0.154108	-4.43467	9.22124e-06	0.000477328	KAT6B	0
chr15_41099081_41100055	35.931	-0.78443	0.176975	-4.43244	9.3173e-06	0.000481181	DNAJC17	0
chr15_41099081_41100055.1	35.931	-0.78443	0.176975	-4.43244	9.3173e-06	0.000481181	ZFYVE19	0
chr8_62408591_62409293	28.0118	-0.887793	0.200461	-4.42876	9.47775e-06	0.000488334	CLVS1	-208078
chr20_62370192_62372785	39.696	-0.85256	0.193041	-4.41647	1.00325e-05	0.000513351	LIME1	-2523
chr20_62370192_62372785.1	39.696	-0.85256	0.193041	-4.41647	1.00325e-05	0.000513351	RP4-583P15.14	-570
chr20_62370192_62372785.2	39.696	-0.85256	0.193041	-4.41647	1.00325e-05	0.000513351	RP4-583P15.15	-29977
chr20_62370192_62372785.3	39.696	-0.85256	0.193041	-4.41647	1.00325e-05	0.000513351	SLC2A4RG	0
chr22_37880417_37882609	51.4856	-0.68401	0.154994	-4.41315	1.01876e-05	0.0005195	MFNG	0
chr19_16999354_16999913	26.6153	-1.04994	0.238111	-4.40946	1.03628e-05	0.000527825	F2RL3	0
chr8_22456291_22457666	37.1051	-0.748809	0.169951	-4.40601	1.0529e-05	0.000535679	AC037459.4	-9486
chr8_22456291_22457666.1	37.1051	-0.748809	0.169951	-4.40601	1.0529e-05	0.000535679	C8orf58	0
chr21_45758467_45759674	83.5926	-0.592591	0.13458	-4.40327	1.06632e-05	0.000540655	AP001062.9	0
chr21_45758467_45759674.1	83.5926	-0.592591	0.13458	-4.40327	1.06632e-05	0.000540655	C21orf2	0
chr19_34849826_34850735	40.399	-0.73923	0.16791	-4.40254	1.06989e-05	0.000541849	AC010504.2	0
chr17_38083605_38084158	86.9854	-0.859755	0.195364	-4.4008	1.07855e-05	0.00054499	RP11-387H17.4	0
chr9_140499425_140500682	34.648	-0.855709	0.194459	-4.40046	1.0802e-05	0.000545209	ARRDC1	0
chr16_764826_766045	25.9181	-1.02795	0.233616	-4.40017	1.08166e-05	0.000545327	METRN	0
chr3_33480825_33482934	62.4909	-0.631174	0.143506	-4.39826	1.09124e-05	0.000549153	UBP1	0
chr3_13183278_13183923	12.8401	-1.19496	0.271762	-4.39709	1.0971e-05	0.000551238	IQSEC1	-146652
chr21_34442285_34444544	40.2087	-0.858374	0.195283	-4.39553	1.10502e-05	0.000554588	AP000282.2	0
chr21_34442285_34444544.1	40.2087	-0.858374	0.195283	-4.39553	1.10502e-05	0.000554588	OLIG1	0
chr1_1092807_1094077	30.0458	-0.744648	0.169767	-4.38629	1.15298e-05	0.000576062	MIR200B	8407
chr4_83349829_83352023	82.3749	-0.594382	0.135663	-4.3813	1.17972e-05	0.000588105	ENOPH1	0
chr4_83349829_83352023.1	82.3749	-0.594382	0.135663	-4.3813	1.17972e-05	0.000588105	HNRNPDL	0
chr17_79875585_79878007	55.8217	-0.6503	0.1485	-4.37912	1.19161e-05	0.00059328	MAFG	7584
chr17_79875585_79878007.1	55.8217	-0.6503	0.1485	-4.37912	1.19161e-05	0.00059328	SIRT7	0
chr8_143533951_143534982	28.3335	-0.965347	0.220454	-4.37891	1.19277e-05	0.00059328	BAI1	-3161
chrX_39955840_39959880	57.0463	-0.804148	0.183838	-4.37422	1.21868e-05	0.000603469	BCOR	76703
chr19_33684999_33686383	26.0599	-1.05657	0.241568	-4.37379	1.22106e-05	0.000603976	LRP3	0
chr6_31548460_31549470	21.3117	-1.10239	0.252123	-4.37243	1.22873e-05	0.000607098	LTB	830
chr1_202611645_202612839	20.4334	-1.19286	0.27294	-4.37041	1.24015e-05	0.000612059	SYT2	66707
chr11_64013367_64015225	36.6476	-0.81309	0.186073	-4.36974	1.24396e-05	0.000613259	PPP1R14B	0
chr11_64013367_64015225.1	36.6476	-0.81309	0.186073	-4.36974	1.24396e-05	0.000613259	RP11-783K16.13	1742
chr11_64013367_64015225.2	36.6476	-0.81309	0.186073	-4.36974	1.24396e-05	0.000613259	RP11-783K16.5	0
chr3_197806893_197808546	50.3402	-0.659382	0.150923	-4.369	1.24818e-05	0.00061398	ANKRD18DP	0
chr9_36400041_36401584	57.4129	-0.630571	0.144326	-4.36907	1.24775e-05	0.00061398	RNF38	0
chr9_136932024_136933956	39.8186	-0.807526	0.18511	-4.36241	1.28636e-05	0.000629285	BRD3	0
chr8_128749808_128750226	18.0907	-1.23543	0.283669	-4.35517	1.32961e-05	0.000649017	MYC	-2129
chr2_202897856_202899358	36.907	-0.907314	0.208382	-4.35408	1.33627e-05	0.000650841	FZD7	0
chr2_202897856_202899358.1	36.907	-0.907314	0.208382	-4.35408	1.33627e-05	0.000650841	RP11-107N15.1	0
chr5_176899798_176900814	16.5394	-1.2203	0.280294	-4.35362	1.33905e-05	0.000651482	DBN1	0
chr19_34855804_34856790	27.888	-0.965689	0.221982	-4.35031	1.35946e-05	0.000660626	GPI	-160
chr20_5380604_5381261	14.2689	-1.22693	0.282046	-4.35009	1.36081e-05	0.000660626	LINC00658	45072
chr12_122240729_122242752	46.6339	-0.66784	0.153631	-4.34704	1.37987e-05	0.000667694	RHOF	0
chr12_122240729_122242752.1	46.6339	-0.66784	0.153631	-4.34704	1.37987e-05	0.000667694	SETD1B	0
chr9_140484878_140485568	22.3444	-1.16334	0.267632	-4.34679	1.38143e-05	0.000667722	ZMYND19	0
chr19_51713844_51714562	30.0497	-0.867576	0.199665	-4.34515	1.3918e-05	0.000670793	SIGLEC22P	0
chr16_2517622_2518653	21.9065	-1.15831	0.266863	-4.34048	1.42173e-05	0.00068423	RP11-715J22.2	0
chr3_38494916_38496224	25.9459	-0.934138	0.215242	-4.33995	1.42517e-05	0.000685144	ACVR2B	0
chr3_38494916_38496224.1	25.9459	-0.934138	0.215242	-4.33995	1.42517e-05	0.000685144	ACVR2B-AS1	88
chr2_98611571_98613135	49.6551	-0.673587	0.155394	-4.3347	1.45962e-05	0.00070095	TMEM131	0
chr17_66287258_66288461	30.3423	-0.885189	0.204257	-4.33371	1.46616e-05	0.000703333	ARSG	-31936
chr17_66287258_66288461.1	30.3423	-0.885189	0.204257	-4.33371	1.46616e-05	0.000703333	SLC16A6	0
chr1_65532386_65534080	32.1	-0.92049	0.212545	-4.3308	1.48567e-05	0.000711921	RP4-535B20.1	0
chr1_94374355_94375476	35.3898	-0.851	0.196552	-4.32965	1.49348e-05	0.000714894	GCLM	0
chr11_64126489_64127025	12.5405	-1.49438	0.34518	-4.32928	1.49598e-05	0.000715322	RPS6KA4	0
chr1_54665654_54666459	20.9821	-1.2452	0.287907	-4.32501	1.52521e-05	0.000727738	MRPL37	-15941
chr1_54665654_54666459.1	20.9821	-1.2452	0.287907	-4.32501	1.52521e-05	0.000727738	RP11-446E24.4	0
chr22_18593128_18593711	11.3208	-1.58782	0.367194	-4.3242	1.53083e-05	0.000728856	TUBA8	0
chr4_57975809_57977909	64.6643	-0.673657	0.155931	-4.32022	1.55875e-05	0.000738202	IGFBP7	0
chr4_57975809_57977909.1	64.6643	-0.673657	0.155931	-4.32022	1.55875e-05	0.000738202	IGFBP7-AS1	0
chr15_65425150_65426474	50.2709	-0.69072	0.15989	-4.31996	1.56056e-05	0.000738271	PDCD7	0
chrX_39871671_39874306	40.4776	-0.691295	0.160112	-4.31757	1.57754e-05	0.000745514	AC092198.1	-3143
chr12_44229415_44230310	24.582	-1.01914	0.236093	-4.31669	1.58385e-05	0.000747703	TMEM117	0
chr13_27998430_28000639	58.4628	-0.630379	0.146385	-4.30632	1.65995e-05	0.000779495	GTF3A	0
chr22_29598231_29599310	34.5669	-0.881354	0.205183	-4.29545	1.7434e-05	0.000812679	EMID1	2530
chr2_105945248_105946967	29.3234	-0.816461	0.190095	-4.29501	1.74682e-05	0.000813421	AC012360.4	-4582
chr2_105945248_105946967.1	29.3234	-0.816461	0.190095	-4.29501	1.74682e-05	0.000813421	TGFBRAP1	0
chr3_13035206_13036831	28.9823	-1.02569	0.23888	-4.29375	1.75678e-05	0.000816875	IQSEC1	0
chr9_100880320_100882677	40.8632	-0.779695	0.181594	-4.29361	1.7579e-05	0.000816875	TRIM14	0
chr14_74058401_74059302	17.3658	-1.319	0.307393	-4.29092	1.77937e-05	0.000824269	ACOT4	0
chr6_107435339_107437269	32.7989	-0.863782	0.201406	-4.28875	1.79679e-05	0.000831474	BEND3	0
chr17_33446491_33447113	16.6666	-1.11614	0.2603	-4.28788	1.80386e-05	0.000833878	RAD51D	0
chr17_33446491_33447113.1	16.6666	-1.11614	0.2603	-4.28788	1.80386e-05	0.000833878	RAD51L3-RFFL	1400
chr2_74211253_74213145	39.0155	-0.690859	0.161197	-4.28579	1.82091e-05	0.000840014	AC073046.25	0
chr2_225905778_225907642	43.6253	-0.756055	0.176407	-4.28586	1.82036e-05	0.000840014	DOCK10	0
chr4_6910820_6911975	45.7939	-0.62452	0.145774	-4.28416	1.83427e-05	0.000845304	AC092463.1	43041
chr18_43355069_43355865	29.1064	-0.754496	0.176222	-4.2815	1.85638e-05	0.000854608	RP11-116O18.3	-27889
chr21_45719345_45720679	32.0744	-0.78776	0.184145	-4.27793	1.88639e-05	0.000865739	PFKL	0
chr11_776637_778027	28.3513	-0.911149	0.213115	-4.27537	1.90816e-05	0.000873028	AP006621.5	0
chr11_776637_778027.1	28.3513	-0.911149	0.213115	-4.27537	1.90816e-05	0.000873028	PDDC1	0
chr11_125756750_125758170	50.0283	-0.648797	0.151791	-4.27428	1.91759e-05	0.000874643	HYLS1	-3242
chr4_129208668_129209799	39.2593	-0.722137	0.168936	-4.27462	1.91465e-05	0.000874643	PGRMC2	186
chr8_38088751_38089553	29.2361	-0.899259	0.210403	-4.27397	1.9202e-05	0.00087494	DDHD2	17740
chr16_3095925_3096688	17.0683	-1.2508	0.292685	-4.27352	1.92411e-05	0.000875822	MMP25	0
chr11_57652677_57653236	12.6062	-1.26211	0.295387	-4.27273	1.93093e-05	0.000878031	CTNND1	-131963
chr1_157107297_157108953	46.2595	-0.804751	0.188389	-4.27176	1.93933e-05	0.000880952	ETV3	0
chr2_65172957_65174173	51.2788	-0.776353	0.181846	-4.26928	1.96107e-05	0.000889916	snoU13	-37137
chr1_45965444_45966336	32.5056	-0.928968	0.21763	-4.26856	1.96736e-05	0.000890955	CCDC163P	0
chr3_132440738_132441987	31.7068	-0.838134	0.196389	-4.26773	1.97474e-05	0.000892456	NPHP3	0
chr3_132440738_132441987.1	31.7068	-0.838134	0.196389	-4.26773	1.97474e-05	0.000892456	NPHP3-AS1	-145
chr8_9911518_9912692	47.4785	-0.722247	0.169243	-4.26751	1.97669e-05	0.000892456	RP11-1E4.1	0
chr5_96142955_96144308	34.3563	-0.793648	0.186023	-4.2664	1.9865e-05	0.000895977	ERAP1	0
chr11_61594782_61596808	44.1804	-0.752783	0.176575	-4.26324	2.01485e-05	0.00090601	FADS2	-10907
chr12_123755757_123756647	11.0443	-1.58098	0.370823	-4.26344	2.01302e-05	0.00090601	CDK2AP1	235
chr1_154980509_154982131	28.0121	-0.918683	0.215545	-4.26214	2.02481e-05	0.00090957	ZBTB7B	-5377
chr8_143807875_143809311	55.5407	-0.660427	0.154973	-4.26156	2.03007e-05	0.000911016	CTD-2292P10.2	0
chr8_143807875_143809311.1	55.5407	-0.660427	0.154973	-4.26156	2.03007e-05	0.000911016	CTD-2292P10.4	0
chr8_143807875_143809311.2	55.5407	-0.660427	0.154973	-4.26156	2.03007e-05	0.000911016	THEM6	0
chr15_75445237_75447009	52.9393	-0.658303	0.154484	-4.26131	2.0323e-05	0.000911095	SCARNA20	-31230
chr11_63993355_63994504	30.4634	-0.830648	0.194964	-4.26052	2.03948e-05	0.000913396	NUDT22	0
chr11_63993355_63994504.1	30.4634	-0.830648	0.194964	-4.26052	2.03948e-05	0.000913396	TRPT1	0
chr15_68521167_68522417	31.0609	-0.847788	0.199172	-4.25657	2.07584e-05	0.000927814	AC107871.1	0
chr15_68521167_68522417.1	31.0609	-0.847788	0.199172	-4.25657	2.07584e-05	0.000927814	CLN6	27028
chr15_68521167_68522417.2	31.0609	-0.847788	0.199172	-4.25657	2.07584e-05	0.000927814	RP11-315D16.2	0
chr7_105162004_105163144	32.4834	-0.86701	0.20379	-4.25443	2.09583e-05	0.000933936	PUS7	0
chr9_137029734_137030602	36.3111	-0.765302	0.179896	-4.25415	2.09845e-05	0.000934168	RNU6ATAC	-48
chr11_2321581_2323575	37.9572	-0.841548	0.197875	-4.25294	2.10983e-05	0.000938297	C11orf21	0
chr11_2321581_2323575.1	37.9572	-0.841548	0.197875	-4.25294	2.10983e-05	0.000938297	TSPAN32	0
chr20_54903835_54904345	14.4805	-1.16086	0.272999	-4.25224	2.11643e-05	0.000940292	RP11-380D15.3	-29619
chr20_62715051_62715644	12.6103	-1.50979	0.355085	-4.2519	2.11966e-05	0.000940787	C20orf201	69
chr20_62715051_62715644.1	12.6103	-1.50979	0.355085	-4.2519	2.11966e-05	0.000940787	OPRL1	-3526
chr19_32895836_32897277	58.7387	-0.58888	0.138524	-4.25109	2.1273e-05	0.000942301	AC007773.2	0
chr19_32895836_32897277.1	58.7387	-0.58888	0.138524	-4.25109	2.1273e-05	0.000942301	AC007773.3	0
chr19_32895836_32897277.2	58.7387	-0.58888	0.138524	-4.25109	2.1273e-05	0.000942301	DPY19L3	0
chr5_179222553_179223833	29.4123	-0.934043	0.219866	-4.24824	2.15456e-05	0.000950591	LTC4S	-1560
chr5_179222553_179223833.1	29.4123	-0.934043	0.219866	-4.24824	2.15456e-05	0.000950591	MAML1	-62703
chr4_77227235_77227777	15.6468	-1.28345	0.302168	-4.24745	2.16213e-05	0.000952984	FAM47E-STBD1	-57
chr10_7529445_7531429	47.3229	-0.757349	0.178365	-4.24606	2.1756e-05	0.000957029	RNU6-535P	-674
chr19_1173332_1174520	44.3398	-0.633475	0.149261	-4.24408	2.19495e-05	0.000964584	SBNO2	0
chr19_7293210_7295049	50.6708	-0.669012	0.157741	-4.24121	2.22315e-05	0.000975054	INSR	0
chr21_38444413_38446423	58.4532	-0.619437	0.146104	-4.23969	2.23825e-05	0.000980712	PIGP	0
chr21_38444413_38446423.1	58.4532	-0.619437	0.146104	-4.23969	2.23825e-05	0.000980712	TTC3	0
chr8_76319255_76319922	21.0777	-1.21649	0.286993	-4.23873	2.24785e-05	0.000982983	HNF4G	227
chr18_657306_658813	34.2637	-0.898436	0.211977	-4.23836	2.25156e-05	0.000983521	C18orf56	0
chr18_657306_658813.1	34.2637	-0.898436	0.211977	-4.23836	2.25156e-05	0.000983521	TYMS	0
chr6_7051605_7053097	27.4847	-0.913606	0.215677	-4.23599	2.27548e-05	0.000990203	snoU13	-10826
chr17_47074571_47077053	51.582	-0.607922	0.143556	-4.23472	2.28834e-05	0.000992885	IGF2BP1	0
chr17_47074571_47077053.1	51.582	-0.607922	0.143556	-4.23472	2.28834e-05	0.000992885	RP11-501C14.5	0
chr11_82996615_82997851	56.966	-0.608536	0.143848	-4.23039	2.33281e-05	0.00100923	CCDC90B	0
chr11_82996615_82997851.1	56.966	-0.608536	0.143848	-4.23039	2.33281e-05	0.00100923	RP11-727A23.10	0
chr21_40720229_40721960	59.9804	-0.628929	0.14873	-4.22866	2.35085e-05	0.00101605	HMGN1	0
chr14_65568696_65569933	54.9071	-0.635152	0.150442	-4.22191	2.42236e-05	0.00104391	MAX	0
chr14_49770413_49771120	18.5036	-1.06604	0.253245	-4.20953	2.55902e-05	0.00109433	RP11-816J8.1	-226190
chr20_55964260_55966665	42.157	-0.81065	0.192547	-4.21014	2.55211e-05	0.00109433	RBM38	0
chr20_55964260_55966665.1	42.157	-0.81065	0.192547	-4.21014	2.55211e-05	0.00109433	RP4-800J21.3	1454
chr8_145980572_145981306	37.9515	-0.709415	0.16855	-4.20893	2.56577e-05	0.00109617	ZNF251	0
chr22_45635041_45637247	37.803	-0.838983	0.19935	-4.20859	2.56968e-05	0.00109678	KIAA0930	0
chr18_20715101_20716976	32.36	-0.795864	0.189213	-4.20617	2.59734e-05	0.00110647	AC105247.1	0
chr18_20715101_20716976.1	32.36	-0.795864	0.189213	-4.20617	2.59734e-05	0.00110647	CABLES1	-574
chr16_86011152_86013094	53.3459	-0.713018	0.169613	-4.20381	2.62462e-05	0.00111595	RP11-542M13.2	2262
chr17_78427944_78429325	42.4605	-0.637381	0.151665	-4.20257	2.63903e-05	0.00111887	CTD-2526A2.2	0
chr9_140063264_140064421	22.1991	-1.09792	0.261315	-4.20153	2.65121e-05	0.00112297	LRRC26	83
chr9_140063264_140064421.1	22.1991	-1.09792	0.261315	-4.20153	2.65121e-05	0.00112297	MIR3621	0
chr9_140063264_140064421.2	22.1991	-1.09792	0.261315	-4.20153	2.65121e-05	0.00112297	RP11-350O14.18	2016
chr11_19733526_19734549	25.896	-0.966849	0.230261	-4.19893	2.68177e-05	0.00113268	NAV2	-361256
chr11_19733526_19734549.1	25.896	-0.966849	0.230261	-4.19893	2.68177e-05	0.00113268	RP11-359E10.1	0
chr10_97054682_97055328	18.3711	-1.18237	0.281715	-4.19704	2.7043e-05	0.00113789	PDLIM1	-3901
chr11_73308859_73309998	45.7141	-0.651988	0.155345	-4.19703	2.70434e-05	0.00113789	FAM168A	0
chr17_16255679_16256816	26.2528	-0.852414	0.203132	-4.19636	2.71235e-05	0.00114019	CENPV	0
chr16_75108520_75109826	41.5533	-0.837911	0.199703	-4.19579	2.71921e-05	0.00114092	ZNRF1	-75586
chr10_135202558_135203287	17.3273	-1.24514	0.296999	-4.1924	2.76016e-05	0.00115483	PAOX	-9821
chr2_25474351_25475572	23.7695	-0.935736	0.223187	-4.19261	2.75762e-05	0.00115483	DNMT3A	89888
chr15_70784512_70785657	47.4837	-0.673642	0.160715	-4.19154	2.77065e-05	0.00115813	RP11-96C21.1	12611
chr9_132585533_132586653	27.1601	-0.833931	0.198984	-4.19095	2.77787e-05	0.00116006	TOR1A	0
chr1_224803569_224804238	14.3385	-1.63389	0.390151	-4.18784	2.81621e-05	0.00117277	CNIH3	-180956
chr1_224803569_224804238.1	14.3385	-1.63389	0.390151	-4.18784	2.81621e-05	0.00117277	RP11-100E13.1	0
chr4_3293856_3294987	27.0435	-0.959137	0.229092	-4.1867	2.83044e-05	0.0011776	RP11-357G3.2	19557
chr10_103911632_103912446	62.5324	-0.745719	0.178163	-4.1856	2.84411e-05	0.00118213	NOLC1	0
chr16_88877638_88879269	49.4115	-0.656916	0.157006	-4.18401	2.86414e-05	0.00118718	APRT	0
chr16_2954065_2955918	43.4803	-0.731374	0.174881	-4.18214	2.88781e-05	0.00119477	FLYWCH1	6020
chr10_120965635_120967395	46.3973	-0.731064	0.17493	-4.17919	2.92546e-05	0.00120922	GRK5	0
chr6_143832185_143833084	26.4385	-0.947177	0.226704	-4.17803	2.94046e-05	0.00121316	FUCA2	0
chr19_851856_853259	36.2214	-0.862933	0.206625	-4.17633	2.96248e-05	0.00122112	ELANE	-843
chr3_141030237_141031082	44.7842	-0.610944	0.146359	-4.17429	2.98915e-05	0.0012293	RP11-438D8.2	54898
chr10_72237522_72238728	24.8917	-1.01335	0.242789	-4.17381	2.99551e-05	0.00123018	PALD1	0
chr2_27308698_27309740	30.2775	-0.835533	0.200208	-4.17333	3.00179e-05	0.00123162	EMILIN1	-7264
chr2_27308698_27309740.1	30.2775	-0.835533	0.200208	-4.17333	3.00179e-05	0.00123162	KHK	0
chr17_38518898_38519757	17.7611	-1.13592	0.272414	-4.16985	3.04805e-05	0.00124945	CTD-2267D19.3	-1992
chr17_38518898_38519757.1	17.7611	-1.13592	0.272414	-4.16985	3.04805e-05	0.00124945	GJD3	311
chr2_7005277_7006434	37.3073	-0.721064	0.17296	-4.16896	3.05988e-05	0.00125314	CMPK2	333
chr2_7005277_7006434.1	37.3073	-0.721064	0.17296	-4.16896	3.05988e-05	0.00125314	RSAD2	0
chr19_18000149_18001043	25.5503	-0.860286	0.2065	-4.16603	3.09954e-05	0.00126822	SLC5A5	-17368
chr8_63022321_63022830	16.6255	-1.30973	0.314526	-4.16412	3.12556e-05	0.00127769	CTD-2571E19.1	781
chr7_50343513_50344715	27.0447	-0.865308	0.207836	-4.16341	3.13533e-05	0.00128051	IKZF1	0
chr16_67312516_67313782	32.8464	-0.800735	0.19247	-4.16032	3.17805e-05	0.00129321	PLEKHG4	-1104
chr14_25573932_25574469	11.3589	-1.36743	0.328885	-4.15779	3.21347e-05	0.00130643	RP11-89K22.1	21736
chr20_2450708_2451801	44.2205	-0.598207	0.143968	-4.15515	3.25075e-05	0.00131905	RP4-734P14.4	37753
chr20_2450708_2451801.1	44.2205	-0.598207	0.143968	-4.15515	3.25075e-05	0.00131905	SNRPB	0
chr2_87655997_87657025	20.3283	-1.33309	0.321093	-4.15172	3.29991e-05	0.00133305	IGKV3OR2-268	-90364
chr1_40505200_40506719	51.4276	-0.598217	0.144096	-4.1515	3.303e-05	0.00133309	CAP1	0
chr8_144349141_144350197	44.3426	-0.682698	0.164529	-4.14942	3.33322e-05	0.00134164	GLI4	1331
chr7_16460426_16461793	23.9974	-1.06661	0.257076	-4.14903	3.3389e-05	0.00134271	ISPD	0
chr13_114565712_114567171	45.3078	-0.664813	0.160319	-4.14681	3.3714e-05	0.00135333	GAS6	0
chr13_114565712_114567171.1	45.3078	-0.664813	0.160319	-4.14681	3.3714e-05	0.00135333	GAS6-AS2	0
chr2_27008496_27009866	33.3845	-0.891191	0.21491	-4.14682	3.37128e-05	0.00135333	CENPA	-21340
chr9_137000239_137001872	34.5856	-0.787866	0.190031	-4.146	3.3834e-05	0.00135693	LL09NC01-251B2.3	0
chr9_137000239_137001872.1	34.5856	-0.787866	0.190031	-4.146	3.3834e-05	0.00135693	WDR5	0
chr13_26827822_26828696	30.5514	-0.891366	0.215009	-4.14572	3.38747e-05	0.00135734	CDK8	0
chr17_44343704_44345260	51.9008	-0.731667	0.17654	-4.14449	3.4057e-05	0.00136219	RP11-259G18.1	0
chr9_131007174_131008441	24.0449	-0.997861	0.240824	-4.14353	3.42002e-05	0.00136669	DNM1	-41517
chr9_131007174_131008441.1	24.0449	-0.997861	0.240824	-4.14353	3.42002e-05	0.00136669	MIR3154	0
chr22_43506238_43507497	25.3546	-1.04469	0.252199	-4.14232	3.43811e-05	0.00137268	BIK	0
chr19_12888391_12890399	53.7735	-0.661492	0.159719	-4.14161	3.44877e-05	0.00137571	HOOK2	-1957
chr19_12944593_12945228	14.1361	-1.45197	0.350667	-4.14058	3.46429e-05	0.00138066	MAST1	0
chr19_12944593_12945228.1	14.1361	-1.45197	0.350667	-4.14058	3.46429e-05	0.00138066	RTBDN	163
chr21_45626744_45628349	33.8948	-0.852914	0.206034	-4.13969	3.4778e-05	0.0013848	AP001058.3	0
chr8_30584674_30585643	37.1605	-0.74058	0.178926	-4.13903	3.48771e-05	0.00138751	GSR	0
chr22_50628750_50631185	55.5485	-0.645022	0.15588	-4.13795	3.50419e-05	0.0013925	RP3-402G11.25	0
chr22_32339756_32341114	42.2096	-0.747124	0.180642	-4.13594	3.53506e-05	0.00140232	C22orf24	391
chr22_32339756_32341114.1	42.2096	-0.747124	0.180642	-4.13594	3.53506e-05	0.00140232	YWHAH	0
chr21_46293183_46295117	53.2145	-0.619988	0.14993	-4.13518	3.54684e-05	0.00140351	PTTG1IP	0
chr3_50329303_50330405	62.1896	-0.607166	0.146993	-4.13059	3.61832e-05	0.00142799	HYAL3	6495
chr3_50329303_50330405.1	62.1896	-0.607166	0.146993	-4.13059	3.61832e-05	0.00142799	IFRD2	0
chr10_103453758_103455342	43.8566	-0.611564	0.148086	-4.12978	3.63104e-05	0.00143173	FBXW4	0
chr19_54899622_54901671	69.0783	-0.632131	0.153234	-4.12527	3.70304e-05	0.00145754	LAIR1	-17457
chr8_144659854_144660700	25.787	-0.973102	0.235948	-4.12422	3.71999e-05	0.00146163	NAPRT1	84
chr16_66864358_66865190	24.2788	-0.937235	0.227415	-4.12126	3.76812e-05	0.00147663	NAE1	0
chr10_74114083_74115018	69.0454	-0.650876	0.157962	-4.12046	3.78125e-05	0.00148047	DNAJB12	0
chr6_43336583_43337787	40.0165	-0.723168	0.175612	-4.118	3.82176e-05	0.00149371	ZNF318	0
chr11_65819013_65820215	47.161	-0.635246	0.15431	-4.11669	3.84357e-05	0.0014996	SF3B2	-717
chr16_48004086_48004613	10.8	-1.38868	0.33752	-4.11436	3.88255e-05	0.00151216	RP11-523L20.1	-4504
chr16_3018584_3020415	44.2304	-0.690551	0.167983	-4.11085	3.94209e-05	0.00153401	PAQR4	0
chr16_3018584_3020415.1	44.2304	-0.690551	0.167983	-4.11085	3.94209e-05	0.00153401	PKMYT1	10126
chr6_21587569_21589024	33.6066	-0.84066	0.204708	-4.10664	4.01458e-05	0.00155541	SOX4	4948
chr11_32455584_32457340	39.7162	-0.680795	0.165798	-4.10617	4.02268e-05	0.00155585	WT1	0
chr11_32455584_32457340.1	39.7162	-0.680795	0.165798	-4.10617	4.02268e-05	0.00155585	WT1-AS	0
chr5_141122780_141123463	13.7403	-1.19663	0.291409	-4.10636	4.01942e-05	0.00155585	ARAP3	-61010
chr5_43602107_43604329	50.8913	-0.626715	0.152672	-4.10497	4.04373e-05	0.00156127	NNT	0
chr5_43602107_43604329.1	50.8913	-0.626715	0.152672	-4.10497	4.04373e-05	0.00156127	NNT-AS1	0
chr12_51717581_51718219	21.0678	-0.978213	0.238349	-4.10413	4.05842e-05	0.00156559	BIN2	234
chr16_67562611_67563307	15.7507	-1.16223	0.283259	-4.10306	4.07724e-05	0.00157149	FAM65A	0
chr19_3061443_3063011	30.6777	-0.834541	0.203421	-4.10253	4.08656e-05	0.001573	AES	95
chr19_45359431_45360370	41.514	-0.730032	0.177983	-4.10169	4.10139e-05	0.0015767	PVRL2	-10000
chr2_241507381_241508713	17.0221	-1.08926	0.265627	-4.1007	4.11909e-05	0.00158077	RNPEPL1	0
chr16_31213379_31214265	26.5881	-0.892995	0.217915	-4.09791	4.16894e-05	0.00159715	C16orf98	-174
chr16_31213379_31214265.1	26.5881	-0.892995	0.217915	-4.09791	4.16894e-05	0.00159715	PYCARD	49
chr1_20125585_20127023	37.1602	-0.744288	0.181755	-4.09501	4.22151e-05	0.00161313	TMCO4	0
chr5_442284_444331	42.96	-0.634344	0.154894	-4.09533	4.21567e-05	0.00161313	C5orf55	0
chr5_442284_444331.1	42.96	-0.634344	0.154894	-4.09533	4.21567e-05	0.00161313	EXOC3	0
chr7_94138910_94140266	30.0334	-0.795202	0.194185	-4.09508	4.22018e-05	0.00161313	CASD1	0
chr17_43302622_43304016	41.2925	-0.682176	0.166642	-4.09366	4.24622e-05	0.00161979	FMNL1	-3467
chr7_44084012_44085445	36.6351	-0.738816	0.180676	-4.08918	4.329e-05	0.00164192	DBNL	0
chr1_26146065_26147747	37.526	-0.743905	0.182043	-4.08642	4.38071e-05	0.00165565	AL020996.1	0
chr1_26146065_26147747.1	37.526	-0.743905	0.182043	-4.08642	4.38071e-05	0.00165565	MTFR1L	0
chr1_26146065_26147747.2	37.526	-0.743905	0.182043	-4.08642	4.38071e-05	0.00165565	RP1-317E23.3	0
chr1_26146065_26147747.3	37.526	-0.743905	0.182043	-4.08642	4.38071e-05	0.00165565	RP1-317E23.6	-5602
chr12_122459683_122461370	27.0492	-0.914939	0.223893	-4.0865	4.37939e-05	0.00165565	BCL7A	0
chr15_70766649_70768153	46.5421	-0.686891	0.168092	-4.0864	4.38116e-05	0.00165565	RP11-96C21.1	30115
chr19_13273547_13275596	54.3161	-0.644617	0.157775	-4.08566	4.39519e-05	0.00165814	CTC-250I14.6	-8540
chr11_76886382_76887319	21.2313	-0.982602	0.240649	-4.08314	4.44318e-05	0.00167341	MYO7A	-47073
chr8_103822401_103823540	45.8358	-0.633821	0.155343	-4.08014	4.50076e-05	0.00169366	KB-1732A1.1	-3352
chr14_67981597_67982125	11.1163	-1.61718	0.396426	-4.07939	4.51545e-05	0.00169776	TMEM229B	64
chr16_56047805_56048481	21.2084	-0.870211	0.21346	-4.07669	4.56812e-05	0.00171466	CES5A	-57862
chr10_77160826_77162414	38.6917	-0.751216	0.184284	-4.07641	4.5736e-05	0.00171527	RP11-399K21.11	0
chr10_77160826_77162414.1	38.6917	-0.751216	0.184284	-4.07641	4.5736e-05	0.00171527	ZNF503	0
chr10_77160826_77162414.2	38.6917	-0.751216	0.184284	-4.07641	4.5736e-05	0.00171527	ZNF503-AS2	0
chr11_819337_820647	31.5452	-0.885809	0.217609	-4.07065	4.68818e-05	0.00175325	PNPLA2	-436
chr19_29043883_29044350	15.0232	-1.34492	0.330404	-4.07053	4.69062e-05	0.00175325	AC005307.3	174238
chr19_29043883_29044350.1	15.0232	-1.34492	0.330404	-4.07053	4.69062e-05	0.00175325	AC005616.1	79286
chr17_79519113_79519938	23.9716	-0.965609	0.237482	-4.06603	4.78208e-05	0.00178146	C17orf70	0
chr22_38141811_38142980	23.8598	-0.925794	0.227905	-4.06218	4.86156e-05	0.00180653	TRIOBP	-48801
chr19_35758758_35761073	41.7318	-0.696531	0.171842	-4.05331	5.04975e-05	0.00187022	LSR	-19526
chr19_35758758_35761073.1	41.7318	-0.696531	0.171842	-4.05331	5.04975e-05	0.00187022	USF2	0
chr3_50387979_50388817	45.7042	-0.659014	0.16272	-4.04999	5.12196e-05	0.00189223	CYB561D2	0
chr3_50387979_50388817.1	45.7042	-0.659014	0.16272	-4.04999	5.12196e-05	0.00189223	NPRL2	0
chr3_50387979_50388817.2	45.7042	-0.659014	0.16272	-4.04999	5.12196e-05	0.00189223	XXcos-LUCA11.5	0
chr22_38712598_38714831	44.6288	-0.659863	0.162974	-4.04888	5.14641e-05	0.00189969	CSNK1E	0
chr15_101419259_101420572	25.2277	-0.993144	0.24531	-4.04852	5.15422e-05	0.00190089	ALDH1A3	0
chr15_101419259_101420572.1	25.2277	-0.993144	0.24531	-4.04852	5.15422e-05	0.00190089	RP11-66B24.8	-17131
chr1_42921446_42922853	39.918	-0.65876	0.163029	-4.04076	5.32783e-05	0.00195049	PPCS	0
chr1_42921446_42922853.1	39.918	-0.65876	0.163029	-4.04076	5.32783e-05	0.00195049	ZMYND12	0
chr16_50307976_50308647	16.3203	-1.27497	0.315523	-4.04082	5.32644e-05	0.00195049	ADCY7	-27918
chr2_85645129_85646210	27.8364	-0.852876	0.211068	-4.04077	5.32757e-05	0.00195049	SH2D6	0
chr9_14693060_14693569	13.2987	-1.32871	0.329055	-4.03796	5.39188e-05	0.00196746	ZDHHC21	0
chr3_126942938_126943363	10.678	-1.35168	0.335308	-4.03116	5.55033e-05	0.00201866	RNU6-1047P	16555
chr8_131027660_131029129	47.7335	-0.70668	0.175372	-4.0296	5.58718e-05	0.00203041	MIR5194	-6961
chr6_35699166_35700753	30.1382	-0.912859	0.226947	-4.02234	5.76232e-05	0.00208893	RP3-510O8.4	3972
chr3_148709107_148710131	25.0043	-0.92614	0.230281	-4.02179	5.77575e-05	0.0020921	GYG1	11610
chr15_75198664_75199410	21.9565	-1.00129	0.249015	-4.02099	5.79543e-05	0.00209582	FAM219B	53
chr1_235246015_235247559	48.9472	-0.722044	0.179592	-4.02047	5.8083e-05	0.00209877	RP4-597N16.4	20366
chr12_94543178_94543824	14.192	-1.32896	0.330797	-4.01746	5.883e-05	0.00212231	RP11-74K11.2	35997
chr7_32767496_32769309	40.8704	-0.722236	0.179787	-4.01718	5.88996e-05	0.0021231	MIR550A2	3284
chr7_1067001_1068747	33.6389	-0.834307	0.207752	-4.01588	5.92247e-05	0.00212965	AC073957.15	0
chr7_1067001_1068747.1	33.6389	-0.834307	0.207752	-4.01588	5.92247e-05	0.00212965	C7orf50	109147
chr4_39528655_39529927	31.3444	-0.862686	0.214988	-4.01271	6.00249e-05	0.00215494	UGDH	0
chr4_39528655_39529927.1	31.3444	-0.862686	0.214988	-4.01271	6.00249e-05	0.00215494	UGDH-AS1	0
chr5_176232909_176234049	17.9519	-0.973197	0.242612	-4.01133	6.03769e-05	0.00216235	UNC5A	3429
chr17_80063700_80064747	25.2559	-0.902148	0.224956	-4.01032	6.06354e-05	0.00216812	FASN	-7492
chr2_241824525_241825788	26.7598	-0.912133	0.227473	-4.00986	6.07549e-05	0.00216891	C2orf54	9786
chr17_1627677_1628568	25.9012	-0.800775	0.199984	-4.00418	6.22319e-05	0.00221808	WDR81	-7848
chr1_25558584_25559908	44.0288	-0.587453	0.146812	-4.00141	6.29671e-05	0.0022389	SYF2	0
chr12_6676992_6677863	23.4007	-0.976476	0.244129	-3.99983	6.33889e-05	0.00225031	NOP2	0
chr6_41701870_41703584	35.6845	-0.773805	0.193452	-3.99999	6.33459e-05	0.00225031	TFEB	414
chr19_50036369_50037706	49.9026	-0.694692	0.173746	-3.99833	6.37915e-05	0.00226099	RCN3	-5495
chr9_134113183_134114613	40.4882	-0.754204	0.188628	-3.99837	6.3779e-05	0.00226099	FAM78A	37322
chr22_24092790_24093753	28.1281	-0.842543	0.210825	-3.99642	6.43089e-05	0.00227752	ZNF70	0
chr13_115079250_115080389	43.0567	-0.683873	0.171173	-3.99521	6.46368e-05	0.00228731	CHAMP1	0
chr16_30196784_30197823	23.3679	-0.986496	0.246962	-3.99452	6.48251e-05	0.00229215	CORO1A	-2042
chr16_30960298_30961604	27.5056	-0.868843	0.217597	-3.99291	6.52683e-05	0.00230234	AC135048.13	-592
chr16_30960298_30961604.1	27.5056	-0.868843	0.217597	-3.99291	6.52683e-05	0.00230234	ORAI3	0
chr7_150101644_150102815	35.5337	-0.702292	0.176016	-3.98993	6.6093e-05	0.00232774	ZNF775	-25221
chr19_15687932_15688486	11.5735	-1.27715	0.320134	-3.98943	6.62319e-05	0.00233079	CYP4F23P	-5360
chrX_153250602_153251651	24.9055	-0.998417	0.250294	-3.98897	6.63604e-05	0.00233346	MIR3202-1	-4055
chr8_74557881_74558793	16.7068	-1.23837	0.310499	-3.98831	6.65466e-05	0.00233817	STAU2	100331
chr12_117500678_117501751	37.5856	-0.714186	0.179142	-3.98669	6.70001e-05	0.00235039	TESC	35524
chr9_140195342_140197805	51.2628	-0.654742	0.164292	-3.98524	6.7412e-05	0.00236298	NRARP	0
chr11_3861452_3863052	43.644	-0.63803	0.160161	-3.98368	6.78563e-05	0.00237198	RHOG	0
chr17_80605878_80607060	35.6746	-0.671319	0.168638	-3.98083	6.86757e-05	0.00239783	WDR45B	0
chr20_50417367_50418186	15.5039	-1.1178	0.281079	-3.97683	6.9839e-05	0.00242514	SALL4	829
chr15_90543571_90545824	38.1852	-0.65677	0.165185	-3.97596	7.00965e-05	0.00243218	ZNF710	0
chr9_139266945_139268345	30.6086	-0.864113	0.217435	-3.97413	7.06378e-05	0.00244905	CARD9	0
chr7_30711254_30711984	22.2636	-0.754941	0.19001	-3.97316	7.09244e-05	0.00245623	CRHR2	27762
chr9_139701875_139703249	35.3883	-0.743257	0.187074	-3.97306	7.09551e-05	0.00245623	KIAA1984	-11064
chr9_139701875_139703249.1	35.3883	-0.743257	0.187074	-3.97306	7.09551e-05	0.00245623	KIAA1984-AS1	52
chr9_139701875_139703249.2	35.3883	-0.743257	0.187074	-3.97306	7.09551e-05	0.00245623	RABL6	0
chr9_139701875_139703249.3	35.3883	-0.743257	0.187074	-3.97306	7.09551e-05	0.00245623	RP11-216L13.18	-7058
chr9_139701875_139703249.4	35.3883	-0.743257	0.187074	-3.97306	7.09551e-05	0.00245623	RP11-216L13.19	-8201
chr19_40080800_40081272	13.5197	-1.18238	0.297633	-3.97262	7.10872e-05	0.00245889	LGALS13	11892
chr13_93031487_93032043	15.3354	-1.09835	0.276546	-3.97166	7.13731e-05	0.00246686	GPC5	-980559
chr19_10828254_10829294	41.171	-0.811389	0.20449	-3.96787	7.25175e-05	0.00249672	DNM2	0
chr19_10828254_10829294.1	41.171	-0.811389	0.20449	-3.96787	7.25175e-05	0.00249672	MIR638	0
chr17_19770402_19771484	28.2629	-0.830959	0.209531	-3.9658	7.31488e-05	0.00251263	ULK2	0
chr21_47716240_47718187	35.016	-0.774982	0.195411	-3.96591	7.31158e-05	0.00251263	YBEY	-9990
chr20_62272561_62273739	27.0664	-0.858043	0.21639	-3.96527	7.33137e-05	0.00251441	STMN3	11042
chr18_2571005_2571850	90.3337	-0.890182	0.224702	-3.96161	7.44454e-05	0.0025493	METTL4	0
chr18_2571005_2571850.1	90.3337	-0.890182	0.224702	-3.96161	7.44454e-05	0.0025493	NDC80	0
chr6_74160923_74162482	42.0931	-0.641931	0.162102	-3.96005	7.49352e-05	0.00256185	MB21D1	0
chr8_124428538_124429322	46.6238	-0.589367	0.148879	-3.95868	7.5364e-05	0.00257086	ATAD2	0
chr8_124428538_124429322.1	46.6238	-0.589367	0.148879	-3.95868	7.5364e-05	0.00257086	WDYHV1	0
chr17_55976495_55977660	30.7888	-0.77978	0.197011	-3.95805	7.55637e-05	0.00257176	CUEDC1	55025
chr2_8674600_8675650	32.7733	-0.791429	0.199951	-3.95812	7.55408e-05	0.00257176	AC011747.3	39982
chr2_96931350_96932380	49.3578	-0.667158	0.168584	-3.95741	7.57664e-05	0.00257669	CIAO1	0
chr3_160116764_160118923	59.0788	-0.587385	0.148457	-3.95661	7.6021e-05	0.00258141	IFT80	0
chr3_160116764_160118923.1	59.0788	-0.587385	0.148457	-3.95661	7.6021e-05	0.00258141	RP11-432B6.3	48695
chr3_160116764_160118923.2	59.0788	-0.587385	0.148457	-3.95661	7.6021e-05	0.00258141	SMC4	0
chr2_137284978_137285570	15.8159	-0.949527	0.24006	-3.95537	7.64154e-05	0.00258691	AC010146.2	16371
chr22_31885116_31886857	44.7435	-0.654296	0.165467	-3.95425	7.67762e-05	0.00259518	EIF4ENIF1	0
chr16_28935278_28937236	50.25	-0.599499	0.151622	-3.9539	7.68873e-05	0.00259664	RABEP2	0
chr1_33721299_33723027	26.431	-0.841048	0.212827	-3.95178	7.75712e-05	0.00261607	ZNF362	0
chr2_87633474_87634064	12.3897	-1.52291	0.385406	-3.95144	7.76823e-05	0.00261607	IGKV3OR2-268	-67841
chr16_89082585_89083671	10.9278	-1.46307	0.370553	-3.94833	7.86976e-05	0.00264008	CTD-2555A7.1	-32146
chr5_1523219_1524557	24.6765	-1.03168	0.26135	-3.9475	7.89722e-05	0.00264729	LPCAT1	0
chr18_56530158_56531604	32.1519	-0.644892	0.163414	-3.94636	7.93472e-05	0.00265786	ZNF532	-327
chr1_145138784_145140114	30.7183	-0.817245	0.207166	-3.94489	7.9837e-05	0.00267226	RNU6-1071P	9727
chr19_18747022_18748186	47.9468	-0.663501	0.168222	-3.94421	8.0065e-05	0.00267788	KLHL26	0
chr3_120067547_120068790	35.1257	-0.750823	0.190707	-3.93704	8.24923e-05	0.00274053	LRRC58	0
chr3_120067547_120068790.1	35.1257	-0.750823	0.190707	-3.93704	8.24923e-05	0.00274053	RP11-174O3.3	0
chr8_95906982_95909262	58.8169	-0.613622	0.155849	-3.93728	8.24117e-05	0.00274053	CCNE2	0
chr8_95906982_95909262.1	58.8169	-0.613622	0.155849	-3.93728	8.24117e-05	0.00274053	NDUFAF6	0
chr8_145063928_145065001	38.7927	-0.70387	0.178774	-3.93721	8.24355e-05	0.00274053	GRINA	0
chr16_776764_778791	41.4975	-0.644034	0.163602	-3.93659	8.26476e-05	0.00274364	CCDC78	-291
chr1_41444706_41446392	38.3495	-0.702973	0.178613	-3.93574	8.29404e-05	0.00275131	CTPS1	0
chr2_232419372_232420069	19.3903	-1.11072	0.282433	-3.93269	8.39998e-05	0.00278228	NMUR1	-24166
chr10_90342343_90343260	25.493	-0.939661	0.238958	-3.93232	8.41294e-05	0.00278246	RNLS	1028
chr15_74143880_74144568	12.9763	-1.07881	0.274478	-3.93041	8.48011e-05	0.00280051	RP11-24D15.1	21140
chr2_43428337_43429163	20.8246	-1.13748	0.289463	-3.92963	8.50781e-05	0.00280342	ZFP36L2	24586
chr12_54368114_54368955	17.1616	-1.17863	0.300018	-3.92852	8.54699e-05	0.00281425	HOTAIR	0
chr12_54368114_54368955.1	17.1616	-1.17863	0.300018	-3.92852	8.54699e-05	0.00281425	HOXC11	-1203
chr17_73266310_73267904	57.9499	-0.684881	0.174429	-3.92642	8.62189e-05	0.00283288	MIF4GD	0
chr17_73266310_73267904.1	57.9499	-0.684881	0.174429	-3.92642	8.62189e-05	0.00283288	RP11-649A18.12	0
chr11_560490_561259	22.4606	-0.969264	0.247018	-3.92387	8.71395e-05	0.00285865	C11orf35	0
chr11_560490_561259.1	22.4606	-0.969264	0.247018	-3.92387	8.71395e-05	0.00285865	RASSF7	-87
chr11_45167914_45169102	26.6895	-0.963676	0.245593	-3.92388	8.71338e-05	0.00285865	PRDM11	-50558
chr18_46502049_46502706	11.7221	-1.55501	0.396662	-3.92025	8.84576e-05	0.00289762	RP11-1058N17.1	-11738
chr1_25408601_25409717	43.8193	-0.788338	0.201206	-3.91807	8.92626e-05	0.00291969	RP4-799D16.1	29895
chr14_101586923_101588086	33.7601	-0.674393	0.172173	-3.91695	8.96757e-05	0.0029289	RP11-8L8.2	0
chr7_2774076_2775046	37.4152	-0.805968	0.205759	-3.91704	8.96413e-05	0.0029289	AMZ1	-54921
chr7_2774076_2775046.1	37.4152	-0.805968	0.205759	-3.91704	8.96413e-05	0.0029289	GNA12	79848
chr6_157801034_157802610	35.4452	-0.695326	0.177526	-3.91674	8.97532e-05	0.00292929	ZDHHC14	0
chr17_29297908_29299617	38.6341	-0.691721	0.176653	-3.91571	9.0138e-05	0.00293721	RNF135	0
chr17_29297908_29299617.1	38.6341	-0.691721	0.176653	-3.91571	9.0138e-05	0.00293721	RP11-848P1.2	0
chr19_17007663_17008722	34.5641	-0.734331	0.187542	-3.91556	9.01941e-05	0.00293721	CPAMD8	128904
chr12_94103_95844	47.4177	-0.727557	0.185825	-3.91528	9.0299e-05	0.00293842	AC215219.1	-20781
chr6_111279229_111280456	43.0467	-0.625921	0.159873	-3.91511	9.03633e-05	0.00293842	GTF3C6	0
chr14_66974117_66976248	47.8412	-0.674017	0.17218	-3.91461	9.05495e-05	0.00293883	GPHN	0
chr14_66974117_66976248.1	47.8412	-0.674017	0.17218	-3.91461	9.05495e-05	0.00293883	RP11-72M17.1	0
chr22_43523808_43524510	17.1339	-1.18875	0.303662	-3.9147	9.0518e-05	0.00293883	BIK	-17055
chr3_71833989_71834738	17.1251	-1.18113	0.302615	-3.90308	9.49761e-05	0.00306159	PROK2	0
chr14_24779829_24781465	39.6644	-0.648149	0.166134	-3.90135	9.56558e-05	0.00307904	CIDEB	0
chr14_24779829_24781465.1	39.6644	-0.648149	0.166134	-3.90135	9.56558e-05	0.00307904	LTB4R	0
chr14_24779829_24781465.2	39.6644	-0.648149	0.166134	-3.90135	9.56558e-05	0.00307904	LTB4R2	-1669
chr14_24779829_24781465.3	39.6644	-0.648149	0.166134	-3.90135	9.56558e-05	0.00307904	LTB4R2	-484
chr19_46721403_46721821	12.6057	-1.19768	0.307033	-3.90084	9.58605e-05	0.0030834	AC006262.6	-7905
chr21_43373372_43374504	22.7786	-0.921993	0.236442	-3.89944	9.6414e-05	0.00309672	C2CD2	0
chr19_33165198_33167233	56.9635	-0.601598	0.154302	-3.89884	9.66539e-05	0.00309856	ANKRD27	0
chr19_33165198_33167233.1	56.9635	-0.601598	0.154302	-3.89884	9.66539e-05	0.00309856	RGS9BP	0
chr6_21593575_21595846	45.1717	-0.653755	0.167682	-3.89878	9.66798e-05	0.00309856	SOX4	0
chr3_134944906_134945380	11.7098	-1.45778	0.374029	-3.89752	9.71844e-05	0.00311191	EPHB1	-430803
chr14_93117557_93120134	48.4941	-0.657677	0.168802	-3.89615	9.77321e-05	0.00312329	RIN3	-137440
chr20_4803081_4804473	37.7048	-0.748015	0.191987	-3.89618	9.77225e-05	0.00312329	RASSF2	0
chr5_179285579_179286425	23.2573	-0.934052	0.239934	-3.89296	9.90297e-05	0.00314695	C5orf45	0
chr5_179285579_179286425.1	23.2573	-0.934052	0.239934	-3.89296	9.90297e-05	0.00314695	CTC-241N9.1	0
chr1_209323394_209323937	13.3642	-1.12608	0.289302	-3.89242	9.92496e-05	0.00314918	RP11-385M4.1	4510
chr14_67954665_67955607	30.1193	-0.812101	0.208723	-3.89081	9.99088e-05	0.00316108	TMEM229B	26582
chr8_62789892_62790577	20.4549	-1.02126	0.262627	-3.88863	0.000100813	0.00318515	RP11-705O24.1	864
chr15_90643747_90646073	40.5478	-0.652451	0.167894	-3.88609	0.000101871	0.00320719	CTD-2315E11.1	0
chr15_90643747_90646073.1	40.5478	-0.652451	0.167894	-3.88609	0.000101871	0.00320719	IDH2	0
chr20_61435940_61437735	37.2897	-0.702739	0.180829	-3.8862	0.000101824	0.00320719	OGFR	0
chr20_61435940_61437735.1	37.2897	-0.702739	0.180829	-3.8862	0.000101824	0.00320719	OGFR-AS1	0
chr8_11724715_11726214	53.3526	-0.598998	0.15413	-3.88632	0.000101775	0.00320719	CTSB	0
chr3_33155334_33157039	45.9399	-0.619841	0.159574	-3.88435	0.000102603	0.0032257	CRTAP	0
chr16_66637796_66639538	34.6752	-0.757411	0.195202	-3.88013	0.000104399	0.00327752	CMTM3	0
chr19_54605696_54606411	43.9282	-0.612443	0.157877	-3.87924	0.000104783	0.00328728	NDUFA3	0
chr19_54605696_54606411.1	43.9282	-0.612443	0.157877	-3.87924	0.000104783	0.00328728	OSCAR	0
chrX_153284651_153286141	20.3188	-0.850685	0.219348	-3.87824	0.000105216	0.00329387	IRAK1	0
chrX_153284651_153286141.1	20.3188	-0.850685	0.219348	-3.87824	0.000105216	0.00329387	MIR718	0
chr11_120160051_120160602	14.6737	-1.17675	0.303802	-3.87342	0.000107317	0.00335037	POU2F3	-52703
chr3_63848871_63850578	37.0078	-0.715061	0.184672	-3.87205	0.000107922	0.00336545	ATXN7	0
chr3_63848871_63850578.1	37.0078	-0.715061	0.184672	-3.87205	0.000107922	0.00336545	THOC7	0
chr10_134209500_134211544	45.3131	-0.594309	0.153785	-3.86454	0.0001113	0.00345762	PWWP2B	0
chr16_1727943_1728775	23.4116	-1.00057	0.258929	-3.86426	0.000111425	0.00345842	LA16c-431H6.6	-45684
chr19_878194_878508	17.7858	-1.32754	0.343696	-3.86252	0.000112222	0.00347654	MED16	14711
chr3_178402693_178403114	11.2167	-1.12211	0.290687	-3.86022	0.000113286	0.00350218	KCNMB2	-148701
chr3_178402693_178403114.1	11.2167	-1.12211	0.290687	-3.86022	0.000113286	0.00350218	RP11-385J1.2	175080
chr17_15847933_15849751	37.1221	-0.738596	0.191411	-3.85869	0.000113995	0.00351922	ADORA2B	0
chr7_74488948_74489963	26.5989	-0.820482	0.212805	-3.85556	0.000115464	0.00355226	WBSCR16	0
chr9_27645148_27645609	13.1703	-1.35362	0.351181	-3.85447	0.000115983	0.00356574	C9orf72	-71284
chr12_67587487_67587922	10.4666	-1.18394	0.307206	-3.85388	0.000116259	0.00356932	CAND1	75139
chr12_6937646_6938369	12.6379	-1.32981	0.345409	-3.84996	0.000118138	0.00360958	LEPREL2	-41
chr6_35435903_35436941	27.0429	-0.884744	0.229797	-3.85012	0.000118062	0.00360958	RPL10A	0
chr17_7475538_7477351	58.757	-0.612061	0.159247	-3.84348	0.000121302	0.00369356	EIF4A1	0
chr17_7475538_7477351.1	58.757	-0.612061	0.159247	-3.84348	0.000121302	0.00369356	SENP3-EIF4A1	-8935
chr17_59488269_59489904	30.2559	-0.827116	0.215225	-3.84303	0.000121524	0.00369779	C17orf82	0
chr17_59488269_59489904.1	30.2559	-0.827116	0.215225	-3.84303	0.000121524	0.00369779	RP11-332H18.4	0
chr22_20848827_20851196	51.333	-0.617094	0.160584	-3.84281	0.000121636	0.00369867	KLHL22	0
chr1_25348564_25349930	40.9936	-0.672648	0.175445	-3.83395	0.000126101	0.00380843	MIR4425	64
chr15_73976043_73977348	31.6811	-0.689376	0.179817	-3.83377	0.000126196	0.00380874	CD276	0
chr21_37109869_37111129	38.2164	-0.731909	0.190989	-3.8322	0.000127004	0.00382533	AF015720.3	-4629
chr19_2456518_2457342	29.3241	-0.866323	0.226296	-3.82827	0.000129045	0.00387769	LMNB2	0
chr4_27904604_27905269	18.0021	-1.1524	0.301032	-3.82819	0.000129091	0.00387769	AC007106.1	81417
chr16_8962164_8963159	31.9849	-0.784466	0.205093	-3.82493	0.000130808	0.00392134	CARHSP1	0
chr16_8962164_8963159.1	31.9849	-0.784466	0.205093	-3.82493	0.000130808	0.00392134	RP11-77H9.6	0
chr16_1401445_1402353	35.3648	-0.653142	0.170865	-3.82257	0.000132069	0.00395115	GNPTG	0
chr16_1401445_1402353.1	35.3648	-0.653142	0.170865	-3.82257	0.000132069	0.00395115	TSR3	0
chr12_54377378_54379127	41.2466	-0.759866	0.198818	-3.82192	0.000132416	0.00395887	HOXC-AS3	177
chr12_54377378_54379127.1	41.2466	-0.759866	0.198818	-3.82192	0.000132416	0.00395887	HOXC10	0
chr22_21983037_21984601	41.7256	-0.632708	0.165634	-3.81991	0.000133501	0.00398864	YDJC	0
chr1_62901401_62903414	55.3884	-0.588909	0.1542	-3.81912	0.000133929	0.00399668	USP1	0
chrY_14337649_14338482	10.1241	-1.52652	0.400056	-3.81578	0.000135756	0.00403531	RN7SL702P	55695
chr6_6723585_6725354	32.8666	-0.801204	0.210154	-3.81247	0.000137587	0.0040833	RP1-80N2.2	-12350
chr18_24235077_24237225	30.7449	-0.86029	0.225762	-3.81061	0.000138625	0.0041006	AQP4-AS1	0
chr18_24235077_24237225.1	30.7449	-0.86029	0.225762	-3.81061	0.000138625	0.0041006	KCTD1	134
chr2_38152152_38153079	29.8178	-0.753544	0.197739	-3.81081	0.000138513	0.0041006	RMDN2	0
chr20_3219452_3220900	28.3729	-0.903908	0.237202	-3.81071	0.000138567	0.0041006	SLC4A11	0
chr9_136651521_136653083	35.8348	-0.706862	0.185499	-3.8106	0.00013863	0.0041006	VAV2	204644
chr20_48888623_48889681	25.4242	-0.970993	0.254883	-3.80956	0.000139213	0.0041151	RP11-290F20.3	-4601
chr16_30596529_30597686	35.0896	-0.733844	0.192684	-3.80855	0.000139786	0.0041293	RP11-146F11.5	0
chr16_30596529_30597686.1	35.0896	-0.733844	0.192684	-3.80855	0.000139786	0.0041293	ZNF785	0
chr20_62289050_62290244	40.0008	-0.667476	0.175301	-3.8076	0.00014032	0.00414077	RTEL1	0
chr19_5403974_5404549	17.5598	-0.895848	0.235412	-3.80545	0.000141545	0.00415919	RN7SL626P	4920
chr4_56411777_56413480	44.5075	-0.615873	0.161858	-3.80503	0.000141789	0.00416087	CLOCK	0
chr4_56411777_56413480.1	44.5075	-0.615873	0.161858	-3.80503	0.000141789	0.00416087	RP11-528I4.2	0
chr11_57281538_57283030	29.9194	-0.82398	0.216648	-3.80332	0.00014277	0.00418689	SLC43A1	230
chr15_101873614_101875012	16.3271	-0.977732	0.2571	-3.80293	0.000142996	0.00419075	PCSK6	155031
chr15_101873614_101875012.1	16.3271	-0.977732	0.2571	-3.80293	0.000142996	0.00419075	RP11-299G20.3	0
chr17_77786905_77787671	12.148	-1.25288	0.329522	-3.8021	0.000143476	0.00419378	AC100791.2	-2428
chr19_13783253_13783785	16.6335	-1.14682	0.301591	-3.80256	0.000143209	0.00419378	CCDC130	58789
chr22_24108765_24110690	40.2677	-0.679893	0.178813	-3.80226	0.000143383	0.00419378	CHCHD10	0
chr10_43047799_43048724	35.2685	-0.749033	0.197021	-3.8018	0.000143648	0.00419604	ZNF37BP	0
chr16_88716779_88717682	22.8632	-0.924934	0.243359	-3.80069	0.000144293	0.00420936	CYBA	0
chr11_65307265_65308697	33.1658	-0.79322	0.208756	-3.79974	0.000144846	0.00421995	LTBP3	3479
chr7_47620661_47621874	22.1914	-0.916748	0.241288	-3.79939	0.000145052	0.00422321	TNS3	0
chr13_49106024_49107530	46.8687	-0.644077	0.169606	-3.79748	0.000146177	0.00425317	RCBTB2	0
chr2_24345834_24346973	28.1725	-0.879657	0.231804	-3.79482	0.000147749	0.00428848	FAM228B	-46107
chr2_24345834_24346973.1	28.1725	-0.879657	0.231804	-3.79482	0.000147749	0.00428848	PFN4	0
chr2_220071122_220072083	35.2238	-0.842859	0.222208	-3.7931	0.000148776	0.00430908	ZFAND2B	0
chr9_129986547_129987725	24.833	-0.982795	0.259156	-3.7923	0.00014926	0.0043203	RP13-225O21.2	-2361
chr19_16186876_16188366	64.6569	-0.60611	0.159896	-3.79064	0.000150257	0.00434349	TPM4	-8560
chr15_76135144_76136591	36.4224	-0.688928	0.181842	-3.78861	0.000151489	0.00436496	UBE2Q2	0
chr17_37773889_37774884	20.8858	-0.974044	0.257125	-3.78821	0.000151734	0.00436916	AC087491.2	982
chr1_67217488_67218692	36.8305	-0.767353	0.202596	-3.78761	0.000152104	0.004377	TCTEX1D1	0
chr4_170744800_170745315	12.8222	-1.03195	0.272563	-3.78611	0.000153023	0.00439491	AC106878.1	-38369
chr10_46052873_46053407	14.73	-1.18635	0.31381	-3.78048	0.000156523	0.00448966	2020-03-08	36948
chr1_47133742_47134283	14.1492	-1.14699	0.303492	-3.77929	0.000157274	0.00450828	ATPAF1	5257
chr22_46067569_46068670	32.4784	-0.626669	0.165905	-3.77729	0.000158546	0.00453846	ATXN10	0
chr8_9807265_9807786	14.9677	-1.12471	0.297992	-3.77428	0.000160469	0.00457922	snoU13	-17932
chr2_219735756_219736629	17.0749	-1.106	0.293196	-3.77223	0.000161796	0.0046112	WNT6	-11213
chr7_148787593_148788830	36.7477	-0.681844	0.180785	-3.77157	0.000162222	0.00462037	ZNF786	0
chr19_15734189_15734986	19.3731	-0.887871	0.235556	-3.76925	0.000163739	0.00465761	CYP4F8	-8161
chr17_45972934_45974155	44.2024	-0.657007	0.174326	-3.76884	0.00016401	0.00465937	RP11-6N17.4	0
chr17_45972934_45974155.1	44.2024	-0.657007	0.174326	-3.76884	0.00016401	0.00465937	SP2	0
chr7_23221240_23222137	51.9741	-0.675465	0.179241	-3.76847	0.000164248	0.004663	AC005082.1	-10481
chr7_23221240_23222137.1	51.9741	-0.675465	0.179241	-3.76847	0.000164248	0.004663	NUPL2	0
chr14_103587844_103590180	52.0158	-0.622725	0.165261	-3.76812	0.000164479	0.00466375	LINC00677	0
chr14_103587844_103590180.1	52.0158	-0.622725	0.165261	-3.76812	0.000164479	0.00466375	TNFAIP2	0
chr12_50505396_50506593	46.6892	-0.668226	0.177355	-3.76773	0.000164739	0.00466816	COX14	0
chr12_50505396_50506593.1	46.6892	-0.668226	0.177355	-3.76773	0.000164739	0.00466816	RP4-605O3.4	0
chr2_70994263_70995597	28.3771	-0.830892	0.220591	-3.76666	0.000165446	0.00468519	ADD2	0
chr10_88125895_88126557	13.1064	-1.23183	0.327236	-3.76436	0.000166974	0.0047135	GRID1	0
chr19_9084045_9084633	10.9348	-1.26401	0.33578	-3.76442	0.000166939	0.0047135	MUC16	7386
chr16_2097514_2098228	27.0235	-0.758606	0.20168	-3.76144	0.000168938	0.00475645	NTHL1	0
chr16_2097514_2098228.1	27.0235	-0.758606	0.20168	-3.76144	0.000168938	0.00475645	TSC2	-49
chr17_46687497_46688348	19.413	-0.970933	0.258159	-3.76099	0.000169244	0.00475645	HOXB7	22587
chr9_14322181_14323236	32.6474	-0.749926	0.199395	-3.761	0.000169232	0.00475645	RP11-120J1.1	-5098
chr2_62705041_62705855	15.9816	-1.15202	0.306353	-3.76044	0.000169614	0.00476384	RN7SL18P	12458
chr1_954711_955856	24.9975	-0.811005	0.215739	-3.75919	0.000170462	0.00478164	AGRN	0
chr17_4890472_4891423	29.1539	-0.821055	0.218549	-3.75685	0.000172064	0.00480928	CAMTA2	0
chr17_4890472_4891423.1	29.1539	-0.821055	0.218549	-3.75685	0.000172064	0.00480928	RP5-1050D4.4	-712
chr17_4890472_4891423.2	29.1539	-0.821055	0.218549	-3.75685	0.000172064	0.00480928	RP5-1050D4.5	0
chr3_32442922_32443505	15.6783	-1.15524	0.307665	-3.75484	0.000173449	0.00483799	CMTM7	-9760
chr18_39754786_39755378	13.892	-1.03298	0.275246	-3.75294	0.000174775	0.00486109	LINC00907	11255
chr22_35092479_35093019	12.7816	-1.05218	0.280387	-3.75262	0.000174999	0.00486295	RP1-288L1.5	7858
chr3_182971001_182972692	41.9643	-0.612157	0.163197	-3.75102	0.000176114	0.00488244	B3GNT5	0
chr3_182971001_182972692.1	41.9643	-0.612157	0.163197	-3.75102	0.000176114	0.00488244	MCF2L2	173372
chr10_7513306_7514526	42.7762	-0.727447	0.19399	-3.74992	0.000176889	0.00490016	RP5-1031D4.2	0
chr2_64245720_64247000	30.0112	-0.71228	0.190033	-3.7482	0.000178109	0.00492783	VPS54	-42984
chr14_100110880_100111917	20.8892	-0.944316	0.252106	-3.74572	0.00017988	0.00496449	HHIPL1	0
chr12_122406645_122407322	17.4539	-1.08688	0.290351	-3.74335	0.000181586	0.00500847	WDR66	-50148
chr1_24069484_24070582	27.7575	-0.782509	0.209244	-3.7397	0.000184242	0.0050723	TCEB3	0
chr11_3012894_3014123	35.074	-0.715656	0.191397	-3.73912	0.000184667	0.00507459	NAP1L4	0
chr7_41854549_41856336	38.7634	-0.718656	0.192197	-3.73917	0.000184627	0.00507459	AC005027.3	-109616
chr14_74035748_74037345	33.8253	-0.701135	0.187574	-3.73791	0.000185558	0.00508993	ACOT2	-1425
chr6_150184376_150185609	36.9727	-0.726362	0.194324	-3.73789	0.000185569	0.00508993	LRP11	0
chr6_150184376_150185609.1	36.9727	-0.726362	0.194324	-3.73789	0.000185569	0.00508993	RP11-244K5.8	0
chr11_47381053_47381684	21.2514	-0.968211	0.259145	-3.73617	0.000186841	0.00511457	SPI1	18391
chr13_103425620_103427766	50.0039	-0.606343	0.162322	-3.73544	0.000187386	0.00511457	TEX30	0
chr22_39150895_39152981	45.4046	-0.680754	0.182225	-3.73579	0.000187123	0.00511457	SUN2	37168
chr7_31154350_31155051	18.1113	-0.830088	0.222213	-3.73555	0.000187303	0.00511457	ADCYAP1R1	-62275
chr14_103986944_103988831	32.529	-0.832809	0.223554	-3.72531	0.000195072	0.00527584	CKB	618
chr15_52028651_52030180	30.4916	-0.781817	0.209861	-3.7254	0.000195007	0.00527584	LYSMD2	13455
chr17_29335387_29335813	10.5573	-1.428	0.383323	-3.72533	0.000195063	0.00527584	RP11-848P1.9	0
chr3_67133638_67134115	12.1691	-1.29524	0.347744	-3.7247	0.00019555	0.00528555	KBTBD8	-84908
chr20_61359036_61360197	31.2869	-0.83267	0.223602	-3.72389	0.000196175	0.00529602	NTSR1	-18848
chr10_100537902_100538625	17.089	-1.04044	0.279529	-3.72212	0.000197553	0.00532032	HPSE2	456995
chr13_77565747_77566648	40.3471	-0.747799	0.201063	-3.71922	0.000199839	0.00536564	CLN5	-953
chr8_10949964_10950540	16.9825	-1.02712	0.276221	-3.71847	0.000200432	0.00537831	AF131215.9	13675
chr7_98971885_98973203	30.662	-0.744987	0.200473	-3.71615	0.000202283	0.00542144	ARPC1B	0
chr8_41064349_41065074	25.9867	-0.787682	0.211954	-3.71629	0.000202168	0.00542144	MIR548AO	63589
chr13_28527173_28528825	42.434	-0.629957	0.169544	-3.7156	0.000202724	0.00542171	LINC00543	0
chr19_42432502_42433469	20.602	-1.11087	0.298992	-3.71538	0.000202902	0.00542171	CTD-2575K13.6	-18285
chr22_19158787_19159788	47.5885	-0.849834	0.228701	-3.71592	0.000202467	0.00542171	AC004463.6	0
chr9_131464490_131465883	29.8305	-0.840726	0.226361	-3.71409	0.000203938	0.00543635	PKN3	0
chr10_97667475_97668025	16.1424	-1.20662	0.324976	-3.71294	0.000204865	0.00545454	C10orf131	0
chr10_97667475_97668025.1	16.1424	-1.20662	0.324976	-3.71294	0.000204865	0.00545454	ENTPD1-AS1	181971
chr10_97667475_97668025.2	16.1424	-1.20662	0.324976	-3.71294	0.000204865	0.00545454	RP11-248J23.7	-47171
chr16_23521201_23522191	23.6764	-0.868121	0.233951	-3.71069	0.000206698	0.00549675	GGA2	0
chr17_76123302_76125182	33.5843	-0.730351	0.1969	-3.70925	0.000207874	0.00551487	TMC6	3307
chr19_50918064_50919406	42.0332	-0.676041	0.182375	-3.70687	0.000209834	0.00555693	CTD-2545M3.6	0
chr19_50918064_50919406.1	42.0332	-0.676041	0.182375	-3.70687	0.000209834	0.00555693	POLD1	-30469
chr6_125622501_125623415	17.4707	-0.931648	0.251354	-3.70652	0.000210126	0.00556133	HDDC2	0
chr17_80188133_80190311	44.1438	-0.631482	0.170427	-3.7053	0.000211143	0.00557832	SLC16A3	-1841
chr5_139725793_139726480	17.3167	-1.05808	0.285671	-3.70383	0.000212369	0.00559411	HBEGF	0
chr20_35490317_35492625	42.5519	-0.669493	0.180791	-3.70313	0.000212955	0.00560623	SOGA1	0
chr5_146204426_146204997	13.5128	-1.08438	0.29326	-3.69766	0.000217595	0.00571147	PPP2R2B	256058
chr19_48983516_48984518	29.4445	-0.847835	0.22935	-3.69668	0.000218439	0.00573025	CTC-273B12.8	-413
chr8_20252048_20252608	17.424	-1.20514	0.326061	-3.69606	0.000218971	0.00574082	RP11-563N12.2	-44282
chr12_4382709_4384447	29.7573	-0.797412	0.215975	-3.69215	0.000222369	0.00581281	RP11-264F23.3	904
chr12_4382709_4384447.1	29.7573	-0.797412	0.215975	-3.69215	0.000222369	0.00581281	RP11-264F23.4	0
chr7_140178187_140179458	28.7007	-0.734233	0.198932	-3.69088	0.000223479	0.0058384	MKRN1	0
chr5_153825180_153826402	30.6436	-0.739844	0.200594	-3.68828	0.000225779	0.00588466	SAP30L	0
chr5_153825180_153826402.1	30.6436	-0.739844	0.200594	-3.68828	0.000225779	0.00588466	SAP30L-AS1	0
chr9_92113174_92114332	18.9052	-1.00321	0.272033	-3.68782	0.000226184	0.00589177	SEMA4D	-129
chr17_72983467_72984106	15.4414	-1.21571	0.329703	-3.6873	0.000226645	0.00590032	CDR2L	0
chr16_81477752_81479205	46.2569	-0.783823	0.212601	-3.68683	0.000227066	0.00590784	CMIP	0
chr1_150946283_150947786	35.1584	-0.6387	0.173305	-3.68542	0.000228325	0.0059302	CERS2	0
chr1_150946283_150947786.1	35.1584	-0.6387	0.173305	-3.68542	0.000228325	0.0059302	RP11-316M1.3	-685
chr10_104180525_104181958	38.7344	-0.645297	0.175372	-3.67958	0.000233617	0.00603945	FBXL15	-1536
chr10_104180525_104181958.1	38.7344	-0.645297	0.175372	-3.67958	0.000233617	0.00603945	PSD	0
chr15_66244655_66245299	12.0006	-1.1405	0.310198	-3.6767	0.000236268	0.00610089	MEGF11	300787
chr20_62317777_62318548	26.5398	-0.841837	0.229058	-3.67522	0.000237647	0.00612585	RTEL1	-28615
chr20_62317777_62318548.1	26.5398	-0.841837	0.229058	-3.67522	0.000237647	0.00612585	RTEL1-TNFRSF6B	-27022
chr8_121823484_121824573	34.3026	-0.72826	0.19815	-3.6753	0.000237572	0.00612585	RP11-713M15.2	0
chr8_121823484_121824573.1	34.3026	-0.72826	0.19815	-3.6753	0.000237572	0.00612585	SNTB1	941
chr14_65878502_65879924	32.0871	-0.750961	0.20434	-3.67506	0.000237795	0.00612611	FUT8	0
chr19_17970281_17971131	47.1252	-0.612054	0.166568	-3.6745	0.000238311	0.00613586	RPL18A	0
chr17_4458415_4459106	23.1702	-0.949974	0.258673	-3.67249	0.000240196	0.00616933	MYBBP1A	0
chr19_40939348_40940213	33.8404	-0.699407	0.190466	-3.67208	0.000240581	0.00616933	SERTAD1	-7416
chr12_48206524_48207670	36.2264	-0.669918	0.182465	-3.67149	0.000241141	0.00617655	HDAC7	6726
chr12_108608216_108608699	12.1738	-1.14995	0.313299	-3.67047	0.000242105	0.00619412	WSCD2	-84969
chr11_66623250_66624923	44.0172	-0.650602	0.177472	-3.66594	0.000246428	0.00627762	LRFN4	0
chr11_66623250_66624923.1	44.0172	-0.650602	0.177472	-3.66594	0.000246428	0.00627762	PC	100925
chr2_113238803_113240684	36.3558	-0.70465	0.192219	-3.66587	0.000246496	0.00627762	TTL	0
chr15_41708742_41709921	34.401	-0.766596	0.209208	-3.66428	0.000248037	0.00630829	RTF1	0
chr2_239147601_239149620	36.1888	-0.732506	0.19991	-3.66419	0.000248126	0.00630829	AC096574.4	-7277
chr2_239147601_239149620.1	36.1888	-0.732506	0.19991	-3.66419	0.000248126	0.00630829	HES6	0
chr4_185746193_185748172	45.595	-0.604019	0.164866	-3.66369	0.000248606	0.00631689	RP11-701P16.2	-11421
chr2_85132326_85133521	30.147	-0.761453	0.207856	-3.66337	0.000248919	0.00632124	TMSB10	0
chr11_297540_298337	23.0845	-0.854242	0.233305	-3.66148	0.000250766	0.00635365	IFITM5	1190
chr19_52900859_52901524	27.4527	-0.704141	0.192458	-3.65868	0.000253519	0.0064088	CTD-3018O17.3	0
chr19_52900859_52901524.1	27.4527	-0.704141	0.192458	-3.65868	0.000253519	0.0064088	ZNF528	0
chr16_88519004_88519824	21.8707	-0.909072	0.248509	-3.65811	0.000254084	0.00641943	ZFPM1	0
chr3_194990623_194992615	45.8053	-0.633007	0.173077	-3.65737	0.000254814	0.00643423	ACAP2-IT1	10856
chr6_33175799_33176797	38.5517	-0.883622	0.241864	-3.65339	0.000258802	0.00651392	RING1	0
chr9_5437202_5438143	26.3486	-0.804415	0.220189	-3.6533	0.000258894	0.00651392	PLGRKT	0
chr7_6143881_6144755	45.6357	-0.708109	0.193873	-3.65243	0.000259766	0.00652229	USP42	0
chr5_175121129_175121756	15.6282	-1.13382	0.310456	-3.65209	0.000260112	0.00652728	RNU6-226P	9145
chr3_52016898_52017685	22.538	-0.915527	0.250727	-3.65149	0.000260728	0.00653905	ABHD14A-ACY1	-7823
chr3_52016898_52017685.1	22.538	-0.915527	0.250727	-3.65149	0.000260728	0.00653905	ABHD14B	0
chr3_52016898_52017685.2	22.538	-0.915527	0.250727	-3.65149	0.000260728	0.00653905	ACY1	0
chr9_21334890_21335660	27.7485	-0.709195	0.194358	-3.64891	0.000263351	0.00658999	KLHL9	0
chr2_26256365_26257485	39.1746	-0.641452	0.175813	-3.6485	0.000263779	0.0065933	RAB10	0
chr3_53288549_53290319	37.7157	-0.683634	0.18739	-3.6482	0.000264088	0.00659678	TKT	0
chr1_101004699_101005782	18.5989	-1.08578	0.297688	-3.64739	0.00026492	0.00661068	GPR88	-1007
chr18_46475573_46476840	21.5827	-0.991532	0.272164	-3.64314	0.000269336	0.00669869	SMAD7	242
chr1_9242067_9242580	11.0001	-1.39014	0.381859	-3.64045	0.000272163	0.00674981	RP3-510D11.1	20099
chr1_9242067_9242580.1	11.0001	-1.39014	0.381859	-3.64045	0.000272163	0.00674981	RP3-510D11.2	0
chr9_140094810_140095748	21.5233	-0.856929	0.235414	-3.6401	0.000272536	0.00675529	TPRN	2898
chr1_234912666_234912938	20.2782	-0.990751	0.27221	-3.63966	0.000272995	0.0067629	RP4-781K5.8	-52878
chr10_134120744_134122649	35.2383	-0.673813	0.185246	-3.6374	0.000275399	0.00680558	STK32C	-26
chr6_42981355_42982198	32.1804	-0.705286	0.193902	-3.63733	0.000275482	0.00680558	KLHDC3	0
chr6_42981355_42982198.1	32.1804	-0.705286	0.193902	-3.63733	0.000275482	0.00680558	MEA1	0
chr17_41623198_41623977	18.9877	-1.0497	0.288863	-3.63389	0.000279179	0.00688925	RP11-392O1.4	-1046
chr22_43716824_43717620	15.8463	-0.979856	0.269675	-3.63347	0.00027963	0.00689656	SCUBE1	21775
chr17_26971025_26972633	38.3267	-0.699186	0.192592	-3.6304	0.000282987	0.00696776	KIAA0100	0
chr1_32816455_32817721	28.285	-0.74451	0.205283	-3.62674	0.000287021	0.00703984	RP4-811H24.9	-191
chr1_156465513_156466940	30.3047	-0.792144	0.218453	-3.62616	0.000287669	0.00705186	MEF2D	3681
chr16_12552497_12553837	31.9527	-0.714464	0.197248	-3.62215	0.00029216	0.00713628	SNX29	-481903
chr7_77045100_77046077	23.8748	-0.846133	0.233684	-3.62084	0.000293647	0.00716289	GSAP	0
chr7_77045100_77046077.1	23.8748	-0.846133	0.233684	-3.62084	0.000293647	0.00716289	RP5-899E9.1	0
chr2_97778380_97779588	37.6991	-0.714008	0.197212	-3.62051	0.000294024	0.00716816	ANKRD36	0
chr16_85873239_85873690	16.839	-1.00782	0.278407	-3.61994	0.00029467	0.00717998	COX4I1	-39951
chr1_26826759_26828274	41.4606	-0.586476	0.162288	-3.61379	0.000301749	0.00733642	HMGN2	-27750
chr6_149803026_149804658	43.762	-0.633605	0.175527	-3.60973	0.000306519	0.00743614	ZC3H12D	0
chr10_131265042_131265896	22.9338	-0.896205	0.248305	-3.60929	0.000307038	0.00744062	MGMT	0
chr1_161972536_161974061	47.8858	-0.604617	0.167547	-3.60865	0.000307791	0.00745482	OLFML2B	19370
chr16_68398152_68399348	20.8524	-0.998852	0.27683	-3.60818	0.000308357	0.00746039	SMPD3	83244
chr2_7571020_7571526	14.9167	-1.09591	0.303718	-3.60831	0.000308203	0.00746039	AC013460.1	-9625
chr1_112807547_112808218	17.3004	-1.00794	0.279461	-3.60671	0.000310099	0.00748628	RP5-965F6.2	94933
chr1_201437636_201438483	18.5327	-1.02442	0.284058	-3.60639	0.000310489	0.00749162	PHLDA3	0
chr9_4740649_4741649	22.1791	-0.829018	0.229895	-3.60607	0.000310868	0.00749669	AK3	395
chrX_153606481_153608137	42.598	-0.674795	0.187192	-3.60482	0.000312364	0.0075287	EMD	0
chr2_60778697_60779970	21.492	-0.905859	0.251341	-3.60411	0.000313229	0.00754138	BCL11A	733
chr5_171614450_171615830	35.8956	-0.693752	0.192497	-3.60396	0.000313409	0.00754163	STK10	0
chr12_49760286_49761213	24.4524	-0.87007	0.241463	-3.60333	0.000314168	0.00755174	SPATS2	117
chr3_46886862_46887937	21.6066	-0.9644	0.267734	-3.60208	0.000315677	0.00757574	PRSS42	-11549
chr10_15210042_15211201	29.0284	-0.737483	0.20487	-3.59976	0.000318513	0.00762736	NMT2	0
chr6_44594618_44595459	26.9653	-0.789552	0.219344	-3.59961	0.000318692	0.00762754	RP3-449H6.1	-101623
chr11_65407557_65408588	23.1822	-0.820927	0.228134	-3.59844	0.000320137	0.00764977	SIPA1	-221
chr1_110752328_110753766	35.667	-0.683851	0.190053	-3.59821	0.000320416	0.00765234	KCNC4-AS1	0
chr18_73367856_73368420	16.3018	-1.07957	0.30006	-3.59784	0.000320876	0.00765922	RP11-704C2.1	55921
chr5_131705219_131706097	18.0437	-1.06249	0.295472	-3.5959	0.000323272	0.00770814	AC034220.3	0
chr5_131705219_131706097.1	18.0437	-1.06249	0.295472	-3.5959	0.000323272	0.00770814	SLC22A5	0
chr5_170288687_170289584	20.8277	-0.927837	0.258097	-3.59491	0.000324498	0.007731	RANBP17	0
chr17_56358700_56359511	26.7037	-0.968263	0.269434	-3.59369	0.000326024	0.00776128	MPO	-404
chr19_48774371_48775329	26.2282	-0.784272	0.218265	-3.59321	0.00032663	0.00777156	CTC-241F20.4	0
chr19_48774371_48775329.1	26.2282	-0.784272	0.218265	-3.59321	0.00032663	0.00777156	ZNF114	-98797
chr15_91414218_91415484	24.0063	-0.79983	0.222712	-3.59132	0.000329009	0.00781563	FURIN	-2397
chrX_129216326_129217506	25.3097	-0.873311	0.243193	-3.59103	0.00032938	0.00782027	ELF4	27186
chr9_139780372_139781462	36.2902	-0.792366	0.220679	-3.59057	0.000329951	0.00782965	MIR4479	0
chr9_139780372_139781462.1	36.2902	-0.792366	0.220679	-3.59057	0.000329951	0.00782965	TRAF2	0
chr2_163697117_163697546	15.3028	-0.854772	0.238264	-3.58749	0.00033387	0.0079058	KCNH7	-1877
chr19_58739758_58740565	31.6152	-0.766661	0.213773	-3.58633	0.000335364	0.00793273	ZNF544	0
chr19_1026382_1027163	24.3793	-0.948111	0.264507	-3.58445	0.000337788	0.00798582	CNN2	-85
chr15_75639813_75640702	18.8389	-1.00492	0.280365	-3.58431	0.000337969	0.00798586	NEIL1	-483
chr8_145137222_145137879	25.5483	-0.809696	0.225938	-3.58371	0.000338745	0.00799572	GPAA1	0
chr16_87839893_87840960	27.3703	-0.776209	0.216638	-3.58298	0.000339703	0.00800134	RP4-536B24.3	0
chr2_239335129_239336157	32.4148	-0.741981	0.207083	-3.58302	0.000339642	0.00800134	AC016999.2	214
chr2_239335129_239336157.1	32.4148	-0.741981	0.207083	-3.58302	0.000339642	0.00800134	ASB1	0
chr20_32254482_32255957	28.3659	-0.76147	0.212523	-3.58299	0.000339679	0.00800134	ACTL10	-179
chr20_32254482_32255957.1	28.3659	-0.76147	0.212523	-3.58299	0.000339679	0.00800134	NECAB3	6313
chr3_196729512_196730695	34.029	-0.650585	0.181557	-3.58337	0.000339192	0.00800134	MFI2	25993
chr3_196729512_196730695.1	34.029	-0.650585	0.181557	-3.58337	0.000339192	0.00800134	MFI2-AS1	-3182
chr16_729462_730796	32.9679	-0.726334	0.203002	-3.57797	0.000346275	0.00813893	LA16c-313D11.9	0
chr16_729462_730796.1	32.9679	-0.726334	0.203002	-3.57797	0.000346275	0.00813893	STUB1	0
chr19_844210_844611	10.2974	-1.3076	0.365557	-3.577	0.000347563	0.00816059	PRTN3	-3248
chr1_185662900_185663680	22.008	-0.851349	0.238074	-3.57598	0.000348915	0.00818368	GS1-204I12.4	-38767
chr5_102594108_102595530	34.348	-0.705486	0.197342	-3.57495	0.000350293	0.00821168	C5orf30	0
chr3_9004752_9005400	58.3665	-0.920891	0.257614	-3.57469	0.00035064	0.00821549	RAD18	0
chr18_21594028_21595612	43.3595	-0.614258	0.172064	-3.56995	0.000357056	0.00834387	RP11-403A21.2	0
chr6_6584049_6584868	12.7014	-1.19718	0.335623	-3.56705	0.000361029	0.00842786	LY86-AS1	38137
chr10_89264313_89264823	17.9915	-1.01823	0.285669	-3.56438	0.000364719	0.00849174	MINPP1	0
chr11_27493053_27494553	28.5979	-0.797915	0.223944	-3.56301	0.000366624	0.00852273	LGR4	0
chr11_27493053_27494553.1	28.5979	-0.797915	0.223944	-3.56301	0.000366624	0.00852273	RP11-159H22.2	0
chr16_4232748_4234361	43.8781	-0.631921	0.177356	-3.56302	0.000366617	0.00852273	RP11-95P2.3	0
chr17_8093042_8093986	26.162	-0.742103	0.208319	-3.56233	0.000367571	0.00854028	C17orf59	0
chr20_5099940_5100872	37.5718	-0.732107	0.205595	-3.56093	0.000369547	0.00857276	PCNA	6401
chr4_141173722_141174522	16.5824	-0.948112	0.266246	-3.56104	0.000369393	0.00857276	SCOC	3918
chrX_129305551_129306340	10.6899	-1.19143	0.334613	-3.56063	0.000369961	0.00857342	RAB33A	0
chr16_67875551_67876914	41.9533	-0.606887	0.17057	-3.558	0.00037369	0.00863647	CENPT	4448
chr16_67875551_67876914.1	41.9533	-0.606887	0.17057	-3.558	0.00037369	0.00863647	THAP11	0
chr5_471930_473882	42.891	-0.60654	0.170454	-3.55839	0.000373139	0.00863647	CTD-2228K2.5	0
chr5_471930_473882.1	42.891	-0.60654	0.170454	-3.55839	0.000373139	0.00863647	CTD-2228K2.7	0
chr5_471930_473882.2	42.891	-0.60654	0.170454	-3.55839	0.000373139	0.00863647	SLC9A3	50566
chr7_65337715_65338978	30.7296	-0.679257	0.190905	-3.55809	0.000373559	0.00863647	VKORC1L1	0
chr3_140949947_140950825	21.8192	-0.921493	0.259073	-3.55688	0.000375282	0.00866515	ACPL2	30631
chr3_52566871_52568182	19.9878	-0.946241	0.266162	-3.55513	0.000377788	0.00871399	NT5DC2	889
chr2_201559838_201560781	33.4239	-0.784201	0.220699	-3.55326	0.000380492	0.00876272	AOX3P	32868
chr22_42342364_42343265	21.5914	-1.00697	0.283721	-3.54917	0.000386454	0.00886793	CENPM	0
chr20_23618047_23618808	17.9361	-0.942766	0.265818	-3.54666	0.000390152	0.00894356	CST3	303
chr8_65292356_65292854	17.1861	-0.886862	0.250146	-3.54537	0.000392057	0.00897709	LINC00966	-6472
chr16_2033572_2034690	29.2321	-0.704489	0.198751	-3.54458	0.000393246	0.00899595	GFER	0
chr10_130521756_130522604	21.9422	-0.875543	0.247022	-3.54439	0.000393527	0.00899775	RP11-442O18.2	188539
chr19_6361368_6362160	33.6199	-0.664209	0.187518	-3.54211	0.000396934	0.00906634	CLPP	0
chr19_6361368_6362160.1	33.6199	-0.664209	0.187518	-3.54211	0.000396934	0.00906634	CTB-180A7.3	0
chr14_24701243_24702428	42.3767	-0.589514	0.16676	-3.53511	0.000407608	0.00925791	GMPR2	0
chr14_24701243_24702428.1	42.3767	-0.589514	0.16676	-3.53511	0.000407608	0.00925791	NEDD8	0
chr14_24701243_24702428.2	42.3767	-0.589514	0.16676	-3.53511	0.000407608	0.00925791	NEDD8-MDP1	0
chr16_2478690_2479928	30.4129	-0.775015	0.219471	-3.53128	0.000413552	0.00936121	CCNF	0
chr2_137340174_137340621	12.9551	-0.997038	0.282354	-3.53117	0.00041373	0.00936121	AC010146.2	-38234
chr9_138985771_138987672	32.0489	-0.718187	0.203385	-3.53116	0.000413738	0.00936121	RP11-83N9.5	13256
chr21_38593004_38594032	33.5842	-0.642784	0.182065	-3.53051	0.000414753	0.0093684	AP001432.14	0
chr21_38593004_38594032.1	33.5842	-0.642784	0.182065	-3.53051	0.000414753	0.0093684	DSCR9	-12201
chr4_2464115_2464759	13.7616	-1.11105	0.314702	-3.53049	0.000414788	0.0093684	RP11-503N18.3	-12416
chr9_134614691_134615740	17.6862	-0.904354	0.256532	-3.52531	0.000422992	0.00953917	RAPGEF1	0
chr16_28222425_28223723	37.9186	-0.604749	0.171601	-3.52416	0.000424836	0.00957106	XPO6	0
chr11_63341592_63342365	16.8439	-0.997411	0.283619	-3.51673	0.000436897	0.00979709	PLA2G16	39477
chr19_42703245_42703922	19.7035	-0.968563	0.275435	-3.51649	0.000437289	0.00979709	DEDD2	20354
chr20_36927012_36927724	21.0898	-0.882395	0.250919	-3.51665	0.000437025	0.00979709	BPI	-38436
chr20_36927012_36927724.1	21.0898	-0.882395	0.250919	-3.51665	0.000437025	0.00979709	CTD-2308N23.2	27215
chr20_47443783_47445286	33.2639	-0.648583	0.184414	-3.51699	0.000436468	0.00979709	PREX1	0
chr6_88930057_88930652	14.1945	-0.991282	0.281847	-3.5171	0.000436296	0.00979709	CNR1	-53979
chr12_175925_176703	18.1765	-0.860049	0.245032	-3.50995	0.000448196	0.0100313	IQSEC3	0
chr17_58498634_58500004	34.466	-0.71998	0.205139	-3.50971	0.000448592	0.0100352	C17orf64	0
chr16_4729939_4731150	43.4861	-0.608097	0.173272	-3.5095	0.00044895	0.0100381	MGRN1	-55149
chr16_30464051_30466949	48.0051	-0.62811	0.17904	-3.50821	0.000451135	0.0100819	SEPHS2	-6549
chr2_174313709_174314203	12.0024	-1.20772	0.344506	-3.50564	0.000455505	0.0101541	AC092573.2	-92773
chr7_1550376_1550787	10.3682	-1.3502	0.385235	-3.50487	0.000456831	0.0101735	AC102953.6	-1313
chr2_74684390_74685737	34.1818	-0.707797	0.202055	-3.503	0.000460055	0.010235	INO80B	-2241
chr2_74684390_74685737.1	34.1818	-0.707797	0.202055	-3.503	0.000460055	0.010235	WBP1	0
chr14_71373913_71375377	29.8243	-0.762428	0.217693	-3.50231	0.000461246	0.0102513	PCNX	0
chr15_75248451_75249764	31.8033	-0.735142	0.209934	-3.50178	0.000462157	0.0102664	RPP25	42
chr1_42192501_42193565	32.2874	-0.684202	0.195522	-3.49936	0.000466383	0.0103499	HIVEP3	190814
chr11_77750834_77751582	13.4061	-1.15227	0.329387	-3.49822	0.000468382	0.010379	KCTD14	5656
chr11_77750834_77751582.1	13.4061	-1.15227	0.329387	-3.49822	0.000468382	0.010379	NDUFC2-KCTD14	39330
chr11_65657843_65658747	20.6708	-0.895125	0.255961	-3.49711	0.000470328	0.0104167	CCDC85B	0
chr17_42401978_42403166	34.0353	-0.711988	0.203767	-3.49413	0.000475617	0.0105234	SLC25A39	0
chr16_89574170_89575229	31.7575	-0.704693	0.201702	-3.49373	0.000476328	0.0105339	SPG7	0
chr8_1904855_1905723	29.6931	-0.757461	0.216921	-3.49188	0.000479641	0.0105809	ARHGEF10	-132714
chr3_195716648_195717643	29.2904	-0.740291	0.212074	-3.49071	0.00048173	0.0106164	SDHAP1	0
chr3_54030160_54030865	17.0213	-1.03177	0.295601	-3.4904	0.000482306	0.0106239	SELK	-104145
chr4_41218302_41218691	27.1138	-0.904519	0.25926	-3.48885	0.000485108	0.0106645	APBB2	-1667
chr3_53194716_53196671	36.3415	-0.691732	0.198339	-3.48762	0.000487338	0.0107082	PRKCD	0
chr14_50863074_50864798	43.1403	-0.626768	0.179728	-3.48732	0.000487896	0.0107152	CDKL1	0
chr14_50863074_50864798.1	43.1403	-0.626768	0.179728	-3.48732	0.000487896	0.0107152	RP11-247L20.3	0
chr10_81741320_81742105	17.7815	-1.01955	0.292452	-3.4862	0.00048993	0.0107492	RP11-479O17.10	-13352
chr3_166879331_166880471	37.3511	-0.617905	0.177263	-3.48581	0.000490655	0.0107599	AC092965.1	-136131
chr19_6099845_6100881	48.4308	-0.587149	0.168501	-3.48454	0.000492986	0.0107897	RFX2	98660
chr22_29874476_29874980	10.734	-1.10991	0.318519	-3.4846	0.000492873	0.0107897	RFPL1S	-417
chr5_1111330_1112142	15.5229	-0.936647	0.268916	-3.48304	0.000495752	0.0108309	SLC12A7	9
chr5_1386105_1386791	19.523	-0.963389	0.276598	-3.48299	0.000495839	0.0108309	RP11-325I22.2	-5923
chr5_141061437_141063011	28.0459	-0.792871	0.227619	-3.48333	0.000495217	0.0108309	ARAP3	0
chr17_79880323_79882008	36.1283	-0.678206	0.194799	-3.48157	0.000498477	0.0108778	MAFG	3583
chr17_79880323_79882008.1	36.1283	-0.678206	0.194799	-3.48157	0.000498477	0.0108778	RP11-498C9.12	0
chr1_153949341_153950435	25.3754	-0.775261	0.222757	-3.4803	0.000500853	0.0109189	JTB	0
chr1_153949341_153950435.1	25.3754	-0.775261	0.222757	-3.4803	0.000500853	0.0109189	RP11-422P24.11	0
chr17_73178477_73179529	29.5574	-0.730616	0.209986	-3.47935	0.000502625	0.0109522	SUMO2	0
chr2_232394868_232395498	16.7623	-1.16077	0.333764	-3.47782	0.000505513	0.0110044	NMUR1	0
chr20_29612247_29612449	13.196	-1.15571	0.332353	-3.47736	0.000506377	0.0110124	FRG1B	-391
chr19_850485_851182	28.4032	-0.888309	0.255506	-3.47666	0.000507702	0.0110358	ELANE	0
chr8_9872637_9873287	18.5597	-0.915036	0.263209	-3.47646	0.000508085	0.0110388	RP11-1E4.1	38478
chr13_47127260_47129306	44.1731	-0.588093	0.169194	-3.47586	0.000509219	0.0110526	LRCH1	0
chr19_55765230_55766268	41.05	-0.626694	0.180295	-3.47594	0.000509071	0.0110526	PPP6R1	4096
chr15_40674988_40675600	13.9997	-1.09624	0.315503	-3.47458	0.000511663	0.0111002	KNSTRN	-67
chr19_42867806_42868201	15.4005	-1.0966	0.315749	-3.47303	0.000514627	0.0111482	MEGF8	-38046
chr5_135700817_135701280	11.8291	-1.01919	0.293495	-3.4726	0.000515449	0.0111606	TRPC7	31451
chr10_306779_307311	12.7751	-1.25415	0.362123	-3.46333	0.00053353	0.0114851	AL603831.1	15813
chr1_215740270_215741930	38.2496	-0.615043	0.177625	-3.4626	0.000534978	0.0115107	KCTD3	0
chr2_43439771_43441207	33.9573	-0.704015	0.203372	-3.46171	0.000536751	0.0115433	ZFP36L2	12542
chr16_75681234_75682526	32.5527	-0.64273	0.185754	-3.46011	0.000539965	0.0115945	KARS	0
chr16_75681234_75682526.1	32.5527	-0.64273	0.185754	-3.46011	0.000539965	0.0115945	TERF2IP	0
chr12_133263425_133264546	30.4669	-0.669912	0.193897	-3.455	0.000550299	0.0117721	PXMP2	0
chr3_128839227_128840884	34.6261	-0.673312	0.194879	-3.45502	0.000550255	0.0117721	ISY1-RAB43	38996
chr3_128839227_128840884.1	34.6261	-0.673312	0.194879	-3.45502	0.000550255	0.0117721	RAB43	110
chr7_139476380_139478278	28.8389	-0.754719	0.218562	-3.4531	0.000554174	0.0118322	HIPK2	0
chr20_23142192_23142625	10.6546	-1.23847	0.358726	-3.4524	0.000555618	0.0118517	RNA5SP478	-584
chr4_27968265_27968822	15.2477	-1.08886	0.315465	-3.45161	0.000557259	0.0118639	AC007106.1	17864
chr17_75441011_75442432	30.9397	-0.732166	0.212276	-3.44912	0.000562422	0.0119624	2020-09-09	-163520
chr8_28636733_28637558	27.3428	-0.776576	0.225255	-3.44754	0.000565723	0.012004	INTS9	110202
chr16_90038128_90039537	57.4974	-0.694771	0.201594	-3.44638	0.000568141	0.0120346	AFG3L1P	0
chr16_90038128_90039537.1	57.4974	-0.694771	0.201594	-3.44638	0.000568141	0.0120346	CENPBD1	0
chr16_90038128_90039537.2	57.4974	-0.694771	0.201594	-3.44638	0.000568141	0.0120346	RP11-566K11.5	-1930
chr22_20748074_20748951	21.5634	-0.942369	0.273593	-3.44442	0.000572287	0.0121028	ZNF74	0
chr16_18936850_18938185	32.6201	-0.62211	0.180655	-3.44363	0.000573953	0.0121208	SMG1	0
chr3_4909742_4910757	41.4364	-0.609898	0.177118	-3.44345	0.000574333	0.0121231	AC018816.3	18221
chr1_43389637_43390695	25.2913	-0.86614	0.251583	-3.44276	0.000575802	0.0121426	SLC2A1	33836
chr22_42315251_42316901	33.826	-0.693245	0.201419	-3.44181	0.000577845	0.0121595	CTA-250D10.23	2204
chr11_73087056_73088433	41.4067	-0.634051	0.184252	-3.44121	0.000579124	0.012178	RELT	0
chr9_86237757_86238566	13.0225	-1.031	0.299632	-3.4409	0.000579776	0.012186	IDNK	0
chr3_194760583_194761349	22.1949	-0.927853	0.269732	-3.4399	0.000581923	0.0122196	XXYLT1	46753
chr12_48213059_48214640	29.1103	-0.737649	0.21445	-3.43972	0.00058231	0.0122219	HDAC7	0
chr7_101929482_101930625	24.5872	-0.825932	0.240149	-3.43925	0.000583321	0.0122374	SH2B2	-1078
chr14_36003655_36004806	24.6313	-0.724121	0.210574	-3.4388	0.000584302	0.0122522	INSM2	-408
chr10_71094845_71095203	11.162	-1.17499	0.34177	-3.43795	0.000586134	0.0122733	HK1	-16246
chr12_53573772_53574981	36.0036	-0.633316	0.184223	-3.43777	0.000586527	0.0122757	CSAD	0
chr22_29601375_29602495	17.289	-0.968325	0.281711	-3.4373	0.000587535	0.012291	EMID1	0
chr19_42647214_42648157	24.7538	-0.709224	0.206513	-3.43428	0.000594122	0.0124055	POU2F2	32021
chr20_60941799_60942453	12.1125	-1.33327	0.389259	-3.42514	0.000614471	0.0127765	LAMA5	0
chr3_156806509_156807986	38.8853	-0.675442	0.197324	-3.42301	0.000619312	0.0128591	LINC00880	32808
chr3_156806509_156807986.1	38.8853	-0.675442	0.197324	-3.42301	0.000619312	0.0128591	LINC00881	0
chr17_40074718_40075647	26.9977	-0.722618	0.211316	-3.41961	0.000627102	0.01301	ACLY	0
chr9_130889531_130890993	37.824	-0.611281	0.178759	-3.41959	0.000627165	0.01301	AL590708.2	0
chr9_130889531_130890993.1	37.824	-0.611281	0.178759	-3.41959	0.000627165	0.01301	PTGES2	0
chr12_6560473_6561910	34.1152	-0.66701	0.195085	-3.41907	0.000628355	0.0130257	CD27	-6441
chr12_6560473_6561910.1	34.1152	-0.66701	0.195085	-3.41907	0.000628355	0.0130257	CD27-AS1	0
chr12_6560473_6561910.2	34.1152	-0.66701	0.195085	-3.41907	0.000628355	0.0130257	TAPBPL	0
chr9_134406263_134407150	25.7656	-0.74684	0.218438	-3.41901	0.000628505	0.0130257	UCK1	0
chr6_131456540_131457191	14.2046	-1.08193	0.316852	-3.41463	0.000638694	0.0132	AKAP7	0
chr19_15574561_15575224	19.5362	-0.836509	0.245162	-3.41207	0.000644716	0.0132937	RASAL3	159
chr15_75931863_75933246	41.271	-0.605118	0.177383	-3.41136	0.000646391	0.0133158	IMP3	7802
chr11_67120577_67122304	42.6268	-0.587503	0.17224	-3.41096	0.000647346	0.0133231	AP003419.11	18752
chr11_67120577_67122304.1	42.6268	-0.587503	0.17224	-3.41096	0.000647346	0.0133231	POLD4	0
chr5_134240249_134241508	36.2308	-0.625478	0.183416	-3.41016	0.000649258	0.0133501	PCBD2	0
chr5_36689182_36690871	32.6405	-0.69098	0.202633	-3.41	0.000649633	0.0133517	CTD-2353F22.1	34427
chr11_67188080_67188966	20.4395	-0.924382	0.271158	-3.40902	0.000651969	0.0133935	CARNS1	-4932
chr8_103135565_103136923	41.7787	-0.590236	0.173155	-3.40872	0.000652675	0.0134018	MIR5680	737
chr19_42501182_42502054	19.837	-0.892426	0.261843	-3.40824	0.000653822	0.013413	ATP1A3	-3508
chr6_3258973_3259921	21.8293	-0.814942	0.239104	-3.40831	0.000653671	0.013413	PSMG4	-26933
chr11_48001752_48003220	29.707	-0.707832	0.207716	-3.40769	0.000655163	0.0134281	PTPRJ	0
chr5_139016655_139018094	32.1148	-0.746693	0.219241	-3.40581	0.000659679	0.0135021	CTD-3224K15.3	6494
chr2_43385518_43386600	28.3006	-0.726312	0.213484	-3.40218	0.000668494	0.0136448	AC093609.1	-55689
chr11_120081370_120082157	20.9439	-0.857988	0.252199	-3.40203	0.000668864	0.0136461	OAF	0
chr1_224544319_224545739	32.899	-0.686134	0.201798	-3.40011	0.000673585	0.0136844	CNIH4	0
chr15_29033088_29035266	33.7111	-0.610392	0.179521	-3.40011	0.000673597	0.0136844	RP11-578F21.10	0
chr15_29033088_29035266.1	33.7111	-0.610392	0.179521	-3.40011	0.000673597	0.0136844	RP11-578F21.12	0
chr21_38361796_38362959	34.8867	-0.658093	0.193538	-3.40033	0.000673044	0.0136844	HLCS	0
chr21_46237463_46238687	34.4301	-0.696506	0.204868	-3.39978	0.000674406	0.0136844	SUMO3	0
chr21_48054903_48056125	42.7139	-0.613382	0.180419	-3.39977	0.00067443	0.0136844	PRMT2	0
chr6_19999664_20000550	25.7699	-0.68854	0.20252	-3.39986	0.0006742	0.0136844	RP1-167F1.2	-160353
chr20_31190486_31191544	26.1441	-0.80204	0.235939	-3.39935	0.000675468	0.0136992	RP11-410N8.4	-15206
chr19_36466305_36467012	20.5832	-0.769727	0.226443	-3.39921	0.000675815	0.0137	AF038458.5	-14892
chr16_30428755_30430232	41.9761	-0.648199	0.190767	-3.39785	0.00067917	0.0137618	ZNF771	-9806
chr5_148724614_148725276	25.5583	-0.71752	0.211336	-3.39517	0.000685864	0.0138596	GRPEL2	0
chr5_133877342_133877865	11.5197	-1.05928	0.312132	-3.39369	0.00068958	0.0139094	PHF15	-15911
chr22_43165588_43166372	25.9947	-0.80439	0.237044	-3.39342	0.000690254	0.0139167	A4GALT	-48284
chr11_64884560_64885709	43.1959	-0.607478	0.179193	-3.39008	0.000698716	0.0140682	AP003068.12	0
chr11_64884560_64885709.1	43.1959	-0.607478	0.179193	-3.39008	0.000698716	0.0140682	ZNHIT2	0
chr3_13008892_13009598	22.1239	-0.818304	0.241439	-3.38927	0.000700783	0.0141034	IQSEC1	27029
chr21_46974790_46976008	19.6245	-0.910837	0.268918	-3.38705	0.000706493	0.0141863	SLC19A1	-12405
chr12_54121099_54121720	50.5101	-0.59539	0.175825	-3.38627	0.000708501	0.0142202	CALCOCO1	0
chr16_50279348_50281125	29.8581	-0.701765	0.207272	-3.38571	0.000709931	0.0142425	ADCY7	0
chr17_78430694_78431875	26.5253	-0.758623	0.224098	-3.38523	0.000711184	0.0142612	CTD-2526A2.2	-2165
chr3_159942883_159943806	18.4808	-0.981816	0.290303	-3.38204	0.000719503	0.014402	C3orf80	0
chr3_159942883_159943806.1	18.4808	-0.981816	0.290303	-3.38204	0.000719503	0.014402	IL12A-AS1	0
chr1_26437514_26438833	39.6937	-0.615302	0.181958	-3.38156	0.000720762	0.0144078	PDIK1L	0
chr11_67168861_67169821	33.1808	-0.620878	0.183607	-3.38156	0.000720743	0.0144078	PPP1CA	0
chr2_135788288_135788796	10.2635	-1.19214	0.352561	-3.38138	0.000721223	0.0144105	MAP3K19	16218
chr5_139486839_139487764	31.7665	-0.712853	0.210832	-3.38114	0.000721859	0.0144168	LINC01024	452
chr5_139486839_139487764.1	31.7665	-0.712853	0.210832	-3.38114	0.000721859	0.0144168	PURA	0
chr9_123690994_123691715	18.2096	-0.872699	0.258208	-3.37983	0.000725297	0.0144789	TRAF1	0
chr14_100070436_100071918	33.2122	-0.723011	0.214102	-3.37695	0.000732942	0.0146054	RP11-543C4.1	0
chr7_23636724_23637673	24.5193	-0.723874	0.214443	-3.3756	0.000736538	0.0146639	CCDC126	238
chr6_160941071_160941855	33.9865	-0.674061	0.199797	-3.37372	0.000741585	0.014738	LPAL2	-8915
chr11_63606084_63607714	40.9982	-0.593053	0.175841	-3.37266	0.000744453	0.0147818	C11orf84	-25225
chr6_90604825_90605363	13.6023	-0.968637	0.287391	-3.37045	0.000750466	0.01488	GJA10	-638
chrX_19001937_19003412	23.3232	-0.758454	0.225053	-3.37011	0.000751382	0.0148862	PHKA2	0
chr1_156384081_156384734	13.0273	-0.955182	0.283469	-3.36962	0.000752717	0.0148994	C1orf61	14451
chr11_119599444_119600408	21.3338	-0.92843	0.275606	-3.36869	0.000755274	0.0149234	CTD-2523D13.2	0
chr11_119599444_119600408.1	21.3338	-0.92843	0.275606	-3.36869	0.000755274	0.0149234	PVRL1	0
chr5_94982254_94983106	32.4995	-0.764117	0.227003	-3.3661	0.000762379	0.0150305	RFESD	6659
chr15_63898763_63899412	13.151	-1.24811	0.370939	-3.36474	0.000766148	0.0150848	USP3-AS1	-4975
chr11_64107415_64108378	21.4257	-0.916512	0.272484	-3.36355	0.000769473	0.0151368	CCDC88B	0
chr1_1148292_1148754	10.645	-1.31946	0.392325	-3.36317	0.000770539	0.0151511	TNFRSF4	759
chr20_62168674_62169479	22.7257	-0.811165	0.241214	-3.36284	0.000771449	0.0151623	PTK6	0
chr5_126408774_126409461	21.3158	-0.869129	0.258463	-3.36268	0.000771902	0.0151645	C5orf63	0
chr12_123868122_123869151	28.1087	-0.787013	0.234095	-3.36194	0.000773983	0.0151832	SETD8	0
chr2_27216412_27217285	18.8637	-0.808329	0.240427	-3.36206	0.00077363	0.0151832	AC013472.4	15391
chr2_27216412_27217285.1	18.8637	-0.808329	0.240427	-3.36206	0.00077363	0.0151832	MAPRE3	-22933
chr19_839040_839700	23.3365	-0.810985	0.241371	-3.35991	0.000779674	0.0152767	PRTN3	1263
chr12_2026749_2028226	38.0088	-0.634298	0.188862	-3.35852	0.000783603	0.0153402	CACNA2D4	0
chr12_2026749_2028226.1	38.0088	-0.634298	0.188862	-3.35852	0.000783603	0.0153402	RP5-1096D14.3	0
chr6_110796359_110797913	36.8466	-0.65635	0.195492	-3.35742	0.000786728	0.0153676	SLC22A16	0
chr11_67176683_67177312	17.0844	-0.955919	0.284748	-3.35707	0.000787738	0.0153738	TBC1D10C	-5298
chr2_91669848_91670617	33.9081	-0.737383	0.219645	-3.35715	0.000787493	0.0153738	RP11-575H3.1	97776
chr19_19887034_19887778	45.602	-0.591333	0.176208	-3.35588	0.000791126	0.0154223	CTC-559E9.4	44748
chr19_19887034_19887778.1	45.602	-0.591333	0.176208	-3.35588	0.000791126	0.0154223	CTC-559E9.6	0
chr19_19887034_19887778.2	45.602	-0.591333	0.176208	-3.35588	0.000791126	0.0154223	LINC00663	0
chr5_10249688_10251021	37.996	-0.600523	0.17898	-3.35526	0.000792913	0.0154477	CCT5	0
chr5_10249688_10251021.1	37.996	-0.600523	0.17898	-3.35526	0.000792913	0.0154477	CTD-2256P15.1	-1252
chr5_10249688_10251021.2	37.996	-0.600523	0.17898	-3.35526	0.000792913	0.0154477	FAM173B	0
chr14_70519633_70520132	12.7982	-0.966968	0.288382	-3.35308	0.000799171	0.0155289	SLC8A3	26792
chr16_4731974_4733133	25.4454	-0.759297	0.226446	-3.3531	0.000799126	0.0155289	MGRN1	-57184
chr3_172955675_172956327	14.1003	-1.00359	0.299295	-3.3532	0.000798834	0.0155289	RP11-324C10.1	-84149
chr1_247094376_247095854	36.457	-0.601479	0.179412	-3.35249	0.000800871	0.0155551	AHCTF1	0
chr11_77531504_77532177	23.1264	-0.759514	0.226623	-3.35144	0.000803922	0.0156007	AAMDC	0
chr11_77531504_77532177.1	23.1264	-0.759514	0.226623	-3.35144	0.000803922	0.0156007	RSF1	0
chr14_105526883_105527872	24.693	-0.751583	0.224297	-3.35084	0.00080567	0.0156143	GPR132	3911
chr11_117049142_117049773	27.1867	-0.876783	0.261757	-3.34961	0.000809248	0.0156768	SIDT2	0
chr17_11409747_11410380	11.9494	-1.04102	0.310816	-3.34931	0.000810141	0.0156873	SHISA6	-265168
chr1_110627010_110627553	13.9828	-1.04694	0.312675	-3.34834	0.000812962	0.0157351	RP4-773N10.6	-1701
chr17_46800382_46801531	24.508	-0.804407	0.240252	-3.34818	0.000813436	0.0157374	PRAC2	0
chr3_33137709_33138982	34.3289	-0.694071	0.207447	-3.34577	0.000820542	0.0158611	GLB1	0
chr3_33137709_33138982.1	34.3289	-0.694071	0.207447	-3.34577	0.000820542	0.0158611	TMPPE	0
chr17_17398752_17400398	32.3291	-0.748044	0.223611	-3.34529	0.000821976	0.015875	RASD1	0
chr16_25025443_25027028	41.3781	-0.634828	0.189808	-3.34459	0.000824053	0.0158944	ARHGAP17	0
chr19_49016785_49017448	21.7223	-0.864448	0.258617	-3.34258	0.000830046	0.0159962	CTC-273B12.10	0
chr9_93563659_93564641	21.3694	-0.756657	0.226487	-3.34084	0.000835259	0.0160688	SYK	0
chr22_50638815_50640158	28.6004	-0.757635	0.226872	-3.33948	0.000839368	0.0161339	RP3-402G11.26	0
chr22_50638815_50640158.1	28.6004	-0.757635	0.226872	-3.33948	0.000839368	0.0161339	SELO	0
chr12_122064047_122065574	34.5623	-0.657953	0.197037	-3.33924	0.000840077	0.0161406	ORAI1	0
chr8_139437652_139438165	12.5187	-1.08669	0.325471	-3.33883	0.000841319	0.0161575	FAM135B	70901
chr19_47601053_47601622	20.674	-0.816223	0.244522	-3.33803	0.00084374	0.016183	ZC3H4	15388
chr10_72432026_72432642	14.5827	-1.13197	0.339192	-3.33727	0.000846053	0.0162064	ADAMTS14	0
chr13_52733000_52734012	30.2814	-0.698572	0.209403	-3.33602	0.000849866	0.0162655	NEK3	-1380
chr12_77527285_77527896	13.5045	-0.929636	0.278775	-3.33472	0.000853863	0.0163349	snoU13	28910
chr2_169312127_169313406	25.817	-0.724363	0.217234	-3.33448	0.00085459	0.0163418	CERS6	0
chr6_37493284_37493933	15.8222	-0.836758	0.250982	-3.33393	0.000856268	0.0163669	RP1-153P14.8	-18161
chr2_28589480_28590070	18.5275	-0.858089	0.257492	-3.33249	0.000860717	0.0164449	FOSL2	25245
chr10_75532012_75532866	28.4421	-0.788166	0.236526	-3.33226	0.000861424	0.0164513	AC022400.2	0
chr10_75532012_75532866.1	28.4421	-0.788166	0.236526	-3.33226	0.000861424	0.0164513	FUT11	0
chr10_98255977_98256597	11.8741	-1.08557	0.325814	-3.33186	0.000862678	0.0164682	TLL2	17079
chr19_8570850_8571128	12.5826	-1.17332	0.352203	-3.33137	0.000864182	0.0164828	PRAM1	-2854
chr16_30886207_30887873	38.7058	-0.607997	0.182558	-3.33043	0.000867104	0.0165243	AC106782.20	18665
chr16_30886207_30887873.1	38.7058	-0.607997	0.182558	-3.33043	0.000867104	0.0165243	BCL7C	18409
chr16_30886207_30887873.2	38.7058	-0.607997	0.182558	-3.33043	0.000867104	0.0165243	MIR4519	0
chr1_202662063_202662683	13.6991	-0.915236	0.274915	-3.32916	0.000871073	0.0165691	SYT2	16863
chr10_11653107_11654050	30.1242	-0.696211	0.209139	-3.32894	0.000871776	0.0165691	RP11-138I18.1	0
chr10_11653107_11654050.1	30.1242	-0.696211	0.209139	-3.32894	0.000871776	0.0165691	USP6NL	0
chr19_12996328_12996607	11.4149	-1.30522	0.392146	-3.3284	0.000873465	0.0165691	KLF1	1389
chr2_216176436_216177614	31.0863	-0.641661	0.192775	-3.32856	0.000872973	0.0165691	ATIC	0
chr5_134827314_134828313	21.7186	-0.866325	0.260285	-3.32837	0.000873545	0.0165691	TIFAB	-39225
chr11_75140741_75141679	19.0958	-0.873986	0.262606	-3.32813	0.000874307	0.0165765	KLHL35	0
chr5_171008602_171010594	37.7614	-0.615439	0.184939	-3.3278	0.000875361	0.0165823	FGF18	-161943
chr7_100486786_100488104	28.0914	-0.66526	0.199906	-3.32787	0.000875134	0.0165823	ACHE	6491
chr7_100486786_100488104.1	28.0914	-0.66526	0.199906	-3.32787	0.000875134	0.0165823	UFSP1	0
chr19_39160103_39160632	18.9158	-0.854711	0.257002	-3.32569	0.000881988	0.0166937	ACTN4	-21794
chr22_37249451_37249876	10.9329	-1.18629	0.356808	-3.32471	0.0008851	0.0167383	CTA-833B7.2	16608
chr22_36863589_36864484	25.8044	-0.777438	0.233976	-3.32273	0.000891422	0.0168221	TXN2	13594
chr1_184005847_184007185	39.4547	-0.622422	0.187372	-3.32185	0.000894233	0.01685	COLGALT2	0
chr2_118943211_118944326	29.1025	-0.691032	0.208022	-3.32191	0.000894027	0.01685	AC093901.1	0
chr17_49243236_49244574	32.7991	-0.644413	0.194101	-3.31999	0.000900198	0.0169447	NME1-NME2	-441
chr17_49243236_49244574.1	32.7991	-0.644413	0.194101	-3.31999	0.000900198	0.0169447	NME2	-12286
chr6_13486603_13487967	24.0705	-0.824844	0.248542	-3.31874	0.00090425	0.0170066	GFOD1	0
chr6_13486603_13487967.1	24.0705	-0.824844	0.248542	-3.31874	0.00090425	0.0170066	GFOD1-AS1	-78
chr17_40306821_40307384	22.5009	-0.756183	0.227884	-3.31828	0.000905728	0.0170272	CTD-2132N18.3	0
chr17_40306821_40307384.1	22.5009	-0.756183	0.227884	-3.31828	0.000905728	0.0170272	RAB5C	0
chr17_40306821_40307384.2	22.5009	-0.756183	0.227884	-3.31828	0.000905728	0.0170272	RP11-358B23.1	-204
chr20_45987496_45987979	12.5589	-1.04727	0.315632	-3.318	0.000906658	0.0170374	ZMYND8	-2032
chr11_68451845_68452412	12.5566	-1.35305	0.407874	-3.31733	0.000908823	0.0170709	GAL	-599
chr19_1241451_1242072	45.0315	-0.671783	0.202532	-3.31692	0.000910143	0.0170885	ATP5D	0
chr1_245316625_245318365	40.2971	-0.61591	0.185757	-3.31567	0.000914221	0.0171434	KIF26B	0
chr17_76250405_76250899	12.9498	-1.14715	0.346051	-3.31496	0.000916575	0.0171586	TMEM235	-23015
chr9_136856948_136858350	31.6014	-0.68578	0.206896	-3.31462	0.000917688	0.0171661	VAV2	0
chr1_235092607_235094187	21.1127	-0.861557	0.259995	-3.31374	0.000920566	0.0172044	RP11-443B7.1	5560
chr1_235092607_235094187.1	21.1127	-0.861557	0.259995	-3.31374	0.000920566	0.0172044	RP11-443B7.2	0
chr22_21355896_21357026	44.6317	-0.59033	0.178179	-3.31313	0.000922565	0.0172201	THAP7	0
chr22_21355896_21357026.1	44.6317	-0.59033	0.178179	-3.31313	0.000922565	0.0172201	THAP7-AS1	0
chr6_30614645_30615654	24.6658	-0.763989	0.230628	-3.31264	0.000924186	0.0172421	C6orf136	0
chr11_58991707_58992396	14.4212	-1.02285	0.308794	-3.31242	0.000924928	0.0172425	RN7SL42P	-9535
chr20_49347354_49348366	28.5383	-0.692251	0.209035	-3.31164	0.000927503	0.0172832	PARD6B	0
chrX_102239761_102241325	31.1622	-0.663644	0.20042	-3.31126	0.000928776	0.0172925	LL0XNC01-237H1.3	-44272
chr1_48996432_48996904	10.9953	-1.00962	0.304957	-3.31069	0.000930675	0.0173134	SPATA6	-58587
chr15_78556477_78557467	23.3728	-0.754695	0.22798	-3.31036	0.000931762	0.0173263	DNAJA4	0
chr15_78556477_78557467.1	23.3728	-0.754695	0.22798	-3.31036	0.000931762	0.0173263	RP11-762H8.3	0
chrX_39969923_39970123	20.48	-1.03897	0.314037	-3.30844	0.000938172	0.0174237	BCOR	66460
chr6_149886558_149888075	35.6288	-0.614006	0.185656	-3.30723	0.000942235	0.0174919	GINM1	0
chr15_75315722_75316124	14.9262	-0.974616	0.294718	-3.30695	0.000943192	0.017495	PPCDC	0
chr5_132112598_132113247	16.7616	-0.934621	0.2827	-3.30606	0.000946189	0.0175433	2020-09-08	0
chr2_178257129_178257896	24.7952	-0.765157	0.231451	-3.30591	0.0009467	0.0175455	AC074286.1	0
chr2_178257129_178257896.1	24.7952	-0.765157	0.231451	-3.30591	0.0009467	0.0175455	AGPS	0
chr12_2861679_2862336	16.1127	-0.799584	0.24201	-3.30393	0.00095339	0.0176474	RP11-885B4.1	18739
chr6_31582662_31584002	27.1814	-0.740625	0.22421	-3.30327	0.000955629	0.0176668	AIF1	0
chrX_12992618_12993317	13.0044	-1.0184	0.308359	-3.30265	0.000957755	0.0176988	TMSB4X	46
chr10_89286886_89287328	10.8706	-1.50119	0.454956	-3.29965	0.000968071	0.0178672	MINPP1	-22255
chr15_50978366_50979629	38.8477	-0.611545	0.185443	-3.29776	0.000974598	0.0179727	TRPM7	0
chr11_64808021_64809333	41.5213	-0.614002	0.186219	-3.2972	0.00097655	0.0179847	RP11-399J13.3	-26368
chr11_64808021_64809333.1	41.5213	-0.614002	0.186219	-3.2972	0.00097655	0.0179847	SAC3D1	0
chr11_64808021_64809333.2	41.5213	-0.614002	0.186219	-3.2972	0.00097655	0.0179847	SNX15	-13142
chr12_56709152_56710512	34.682	-0.693943	0.210478	-3.29699	0.000977269	0.0179847	CNPY2	0
chr12_56709152_56710512.1	34.682	-0.693943	0.210478	-3.29699	0.000977269	0.0179847	PAN2	17326
chr12_56709152_56710512.2	34.682	-0.693943	0.210478	-3.29699	0.000977269	0.0179847	RP11-977G19.10	0
chr6_119255562_119256617	32.0894	-0.648289	0.196709	-3.29568	0.00098184	0.0180465	MCM9	0
chr6_119255562_119256617.1	32.0894	-0.648289	0.196709	-3.29568	0.00098184	0.0180465	RP11-351A11.1	0
chr11_124492178_124493137	33.3342	-0.613588	0.186209	-3.29516	0.000983646	0.0180722	TBRG1	0
chr1_197871408_197872303	26.4306	-0.705228	0.214055	-3.29462	0.000985562	0.0180948	C1orf53	0
chr1_110026157_110027076	33.9635	-0.621808	0.188797	-3.29353	0.000989378	0.0181476	ATXN7L2	0
chr10_7008820_7009543	12.0516	-1.1652	0.35378	-3.29357	0.000989249	0.0181476	RP11-799O21.2	-46386
chr11_805007_805753	19.459	-0.874212	0.265604	-3.29141	0.000996875	0.018255	PIDD	3771
chr12_2393051_2394144	25.4997	-0.746942	0.226929	-3.29153	0.000996453	0.018255	CACNA1C	-230588
chr12_2393051_2394144.1	25.4997	-0.746942	0.226929	-3.29153	0.000996453	0.018255	CACNA1C-IT3	-14110
chr7_14087622_14088064	13.8648	-1.02112	0.310207	-3.29173	0.000995744	0.018255	ETV1	-58321
chr17_47337508_47338249	20.8717	-0.856448	0.260274	-3.29056	0.00099988	0.018295	RP1-62O9.3	-11908
chr15_74720894_74721997	19.6747	-0.907897	0.275977	-3.28975	0.00100276	0.0183325	SEMA7A	4812
chr2_234762644_234763253	11.7594	-1.16493	0.354135	-3.2895	0.00100367	0.0183417	HJURP	0
chr21_45078997_45079932	63.8188	-0.651672	0.19815	-3.28878	0.00100622	0.0183807	HSF2BP	0
chr21_45078997_45079932.1	63.8188	-0.651672	0.19815	-3.28878	0.00100622	0.0183807	RRP1B	0
chr9_140008681_140009487	17.6896	-0.899063	0.273408	-3.28836	0.00100773	0.0184008	DPP7	0
chr8_123618720_123619505	28.8128	-0.710763	0.21616	-3.28814	0.00100853	0.0184079	snoU13	64025
chr19_840306_841191	32.235	-0.693094	0.210818	-3.28764	0.00101031	0.0184187	PRTN3	0
chr20_31559400_31560618	24.3542	-0.788798	0.240012	-3.28649	0.00101444	0.0184602	SUN5	31622
chr17_19551182_19552340	26.6198	-0.710213	0.216171	-3.28541	0.00101832	0.0185143	Y_RNA	909
chr22_24059109_24059767	26.372	-1.05135	0.320155	-3.28388	0.00102388	0.0185737	KB-1572G7.2	0
chr5_126852967_126854236	32.7485	-0.694928	0.21161	-3.284	0.00102346	0.0185737	PRRC1	0
chr17_4613341_4614165	22.5744	-0.808536	0.246227	-3.2837	0.00102454	0.0185782	ARRB2	0
chr17_37356036_37357040	23.547	-0.710388	0.216393	-3.28286	0.00102761	0.0186186	RPL19	0
chr1_228745877_228751938	10.5233	-1.37938	0.421042	-3.27612	0.00105242	0.0190064	RNA5S1	0
chr1_228745877_228751938.1	10.5233	-1.37938	0.421042	-3.27612	0.00105242	0.0190064	RNA5S2	0
chr1_228745877_228751938.2	10.5233	-1.37938	0.421042	-3.27612	0.00105242	0.0190064	RNA5S3	0
chr12_7046732_7047620	41.3095	-0.668837	0.204163	-3.27599	0.00105294	0.0190066	ATN1	-13107
chr11_76299346_76299942	19.3625	-0.820023	0.250445	-3.27426	0.00105938	0.0190933	RP11-672A2.6	37937
chr11_62308219_62309435	31.0049	-0.724803	0.221432	-3.27325	0.00106319	0.019131	RP11-864I4.3	-3436
chr19_18451202_18452308	32.1409	-0.72054	0.22017	-3.27265	0.00106542	0.0191595	PGPEP1	0
chr1_167596795_167597962	36.0004	-0.656307	0.200649	-3.27092	0.00107198	0.0192581	RP3-455J7.4	1950
chr4_3533914_3534644	22.8533	-0.724929	0.221732	-3.26939	0.00107779	0.0193545	LRPAP1	0
chr16_56945652_56946427	20.7129	-0.921913	0.282054	-3.26857	0.00108091	0.0194027	SLC12A3	-4715
chr1_247988611_247989019	13.2273	-1.0025	0.306807	-3.26752	0.00108494	0.0194594	OR14A16	-9580
chr17_79669699_79670950	39.6155	-0.585006	0.17903	-3.26763	0.0010845	0.0194594	MRPL12	0
chr17_79669699_79670950.1	39.6155	-0.585006	0.17903	-3.26763	0.0010845	0.0194594	RP13-1032I1.7	0
chr17_79669699_79670950.2	39.6155	-0.585006	0.17903	-3.26763	0.0010845	0.0194594	SLC25A10	0
chr12_6492834_6493703	19.9666	-0.788132	0.241364	-3.26532	0.00109339	0.0195685	LTBR	0
chr9_35649361_35649981	13.6179	-1.04642	0.32047	-3.26525	0.00109366	0.0195685	SIT1	957
chr2_219197404_219198370	29.8994	-0.665575	0.20387	-3.2647	0.00109581	0.0195991	AC021016.8	24320
chr2_219197404_219198370.1	29.8994	-0.665575	0.20387	-3.2647	0.00109581	0.0195991	PNKD	-62290
chr15_78339343_78340815	31.2477	-0.708721	0.217096	-3.26456	0.00109636	0.019601	TBC1D2B	29252
chr5_180618217_180619258	33.899	-0.628757	0.192762	-3.26183	0.00110697	0.0197748	CTC-338M12.2	0
chr5_180618217_180619258.1	33.899	-0.628757	0.192762	-3.26183	0.00110697	0.0197748	CTC-338M12.5	0
chr6_41675219_41675922	16.7881	-0.910535	0.279226	-3.26092	0.0011105	0.0198061	TFEB	28076
chr22_30233886_30234561	22.8217	-0.750649	0.23031	-3.25931	0.00111685	0.0198876	ASCC2	0
chr2_87624861_87625663	22.4869	-0.899724	0.276235	-3.2571	0.00112556	0.0199947	IGKV3OR2-268	-59228
chr3_138634103_138635054	27.8876	-0.726473	0.223056	-3.2569	0.00112635	0.0200008	RP11-548O1.3	27809
chr14_48750099_48750663	11.7937	-1.44561	0.444252	-3.25404	0.00113777	0.0201553	RNU6-297P	59873
chr4_7657189_7657651	16.4091	-1.06247	0.326566	-3.25345	0.00114011	0.0201749	SORCS2	-462925
chr6_28192779_28193377	17.1697	-0.862795	0.265199	-3.25338	0.00114039	0.0201749	ZSCAN9	0
chr1_37431669_37432396	14.2865	-0.878971	0.27037	-3.25099	0.00115003	0.0202917	GRIK3	67335
chr19_52839224_52839896	15.5124	-1.00481	0.309373	-3.24787	0.00116271	0.0204667	CTD-2525I3.6	8587
chr19_52839224_52839896.1	15.5124	-1.00481	0.309373	-3.24787	0.00116271	0.0204667	ZNF610	0
chr17_1961662_1962612	20.9904	-0.832538	0.256527	-3.24542	0.00117279	0.0206116	HIC1	-3270
chr19_17983176_17983773	15.1831	-0.975801	0.300811	-3.2439	0.00117904	0.020697	SLC5A5	-395
chr11_61159627_61160827	26.025	-0.773113	0.238396	-3.24298	0.00118287	0.0207138	TMEM216	-469
chr3_184893285_184893769	13.607	-1.00722	0.310603	-3.24277	0.00118373	0.0207138	EHHADH-AS1	-12627
chr10_74091714_74092389	14.488	-1.01966	0.314564	-3.24149	0.00118906	0.0207907	DNAJB12	22600
chr4_174254749_174256552	43.7032	-0.597702	0.18446	-3.24028	0.00119413	0.0208467	HMGB2	0
chr1_202565316_202566268	15.6979	-0.93076	0.287287	-3.23983	0.00119602	0.0208633	SYT2	113278
chr3_197183246_197183843	15.9062	-0.873627	0.269761	-3.23852	0.00120151	0.0209427	AC128709.3	1352
chr3_197183246_197183843.1	15.9062	-0.873627	0.269761	-3.23852	0.00120151	0.0209427	AC128709.4	0
chr2_114260699_114262026	24.5968	-0.816691	0.252376	-3.23601	0.00121214	0.0210785	FOXD4L1	-4039
chr17_55532138_55533595	36.4413	-0.671328	0.2075	-3.23532	0.00121508	0.0211213	MSI2	-198927
chr17_80079635_80080439	20.2063	-0.903921	0.279482	-3.23427	0.00121954	0.021174	snoU13	19100
chr1_2486975_2488291	31.4157	-0.671333	0.207664	-3.23278	0.00122592	0.02126	RP3-395M20.8	180
chr1_2486975_2488291.1	31.4157	-0.671333	0.207664	-3.23278	0.00122592	0.02126	TNFRSF14	0
chr4_99181167_99183094	39.8504	-0.597511	0.18498	-3.23014	0.00123728	0.0214402	RAP1GDS1	0
chr4_99181167_99183094.1	39.8504	-0.597511	0.18498	-3.23014	0.00123728	0.0214402	RP11-323J4.1	0
chr3_123936350_123936959	14.4263	-0.867652	0.268786	-3.22803	0.00124644	0.021557	MIR5002	-84575
chr1_112375807_112376438	10.5134	-1.17318	0.363722	-3.22549	0.00125759	0.0217037	KCND3	155340
chr22_37415007_37416256	24.28	-0.780183	0.241918	-3.22498	0.0012598	0.0217037	MPST	0
chr22_37415007_37416256.1	24.28	-0.780183	0.241918	-3.22498	0.0012598	0.0217037	TST	0
chr9_140353327_140354284	31.5214	-0.794508	0.246355	-3.22506	0.00125948	0.0217037	NSMF	0
chrY_59362785_59363499	14.8627	-1.07715	0.334082	-3.2242	0.00126326	0.0217364	WASH6P	-8787
chr10_125218403_125218815	11.5081	-1.17838	0.365524	-3.22382	0.00126494	0.0217502	RP11-282I1.1	-102438
chr10_93169322_93170558	27.7036	-0.688709	0.21367	-3.22324	0.00126749	0.0217856	HECTD2	0
chr9_133710027_133711757	35.7733	-0.62105	0.192737	-3.22227	0.00127178	0.021851	ABL1	0
chr8_104513237_104514320	20.76	-0.817566	0.253775	-3.22161	0.00127471	0.0218843	RP11-1C8.4	0
chr14_105640679_105641214	13.5623	-1.04093	0.32332	-3.21951	0.00128411	0.0220373	NUDT14	6427
chr14_105640679_105641214.1	13.5623	-1.04093	0.32332	-3.21951	0.00128411	0.0220373	RP11-44N21.4	6318
chr11_66773953_66774519	10.95	-1.10481	0.343221	-3.21894	0.00128665	0.0220724	SYT12	0
chr6_106441966_106443289	35.2848	-0.639291	0.198615	-3.21875	0.0012875	0.0220784	RN7SKP211	-89719
chr5_60626697_60628207	40.4725	-0.707236	0.219782	-3.2179	0.00129134	0.0221273	ZSWIM6	0
chr18_19320559_19321626	30.9801	-0.68195	0.21194	-3.21766	0.0012924	0.0221369	MIB1	-35642
chr21_33245239_33246496	21.3999	-0.858201	0.266816	-3.21645	0.00129785	0.0222047	HUNK	0
chr14_71158712_71159481	18.7629	-0.844575	0.262611	-3.21606	0.00129962	0.0222264	RP6-65G23.1	5934
chr1_32189279_32189962	14.6588	-0.885602	0.275418	-3.21548	0.00130225	0.0222568	COL16A1	-19359
chr19_1366759_1367644	33.412	-0.66328	0.206279	-3.21545	0.0013024	0.0222568	MUM1	-10397
chr7_150777433_150778230	22.6792	-0.768598	0.239075	-3.21488	0.001305	0.022284	FASTK	0
chr7_150777433_150778230.1	22.6792	-0.768598	0.239075	-3.21488	0.001305	0.022284	TMUB1	2404
chr17_942747_943844	26.7981	-0.642844	0.2	-3.21421	0.00130804	0.0223188	ABR	146773
chr19_1268995_1269872	36.4096	-0.58643	0.18248	-3.21367	0.00131049	0.0223435	CIRBP	-9612
chr19_1268995_1269872.1	36.4096	-0.58643	0.18248	-3.21367	0.00131049	0.0223435	CIRBP-AS1	369
chr15_65133479_65134388	27.4705	-0.666012	0.207349	-3.21204	0.00131798	0.0223912	AC069368.3	0
chr15_65133479_65134388.1	27.4705	-0.666012	0.207349	-3.21204	0.00131798	0.0223912	PLEKHO2	0
chr7_140396100_140397368	38.2804	-0.697295	0.217156	-3.21102	0.00132263	0.0224474	NDUFB2	0
chr7_140396100_140397368.1	38.2804	-0.697295	0.217156	-3.21102	0.00132263	0.0224474	NDUFB2-AS1	0
chr8_134250437_134251237	30.5311	-0.705026	0.219812	-3.2074	0.00133938	0.0226454	NDRG1	58593
chr10_60094536_60095133	16.6201	-0.888281	0.277057	-3.20613	0.00134533	0.0227286	UBE2D1	0
chr19_39260343_39260704	14.8401	-1.00118	0.312528	-3.20349	0.00135774	0.0229209	CAPN12	0
chr5_131746091_131747606	36.5896	-0.596715	0.186367	-3.20182	0.00136561	0.0230363	AC116366.5	14801
chr16_68001719_68002902	28.6895	-0.713459	0.222957	-3.19998	0.00137435	0.0231662	SLC12A4	194
chr17_74497170_74497947	20.4972	-0.826811	0.258399	-3.19974	0.0013755	0.0231687	RHBDF2	0
chr2_25142118_25143653	23.8688	-0.776489	0.242711	-3.19923	0.00137796	0.0231687	SNORD14	48694
chr3_47017729_47018670	27.86	-0.65571	0.204965	-3.19913	0.00137842	0.0231687	CCDC12	4803
chr3_50264783_50265276	21.2117	-0.702894	0.219689	-3.19949	0.0013767	0.0231687	GNAI2	-1060
chr8_29207662_29208876	41.8362	-0.608487	0.190259	-3.19821	0.00138283	0.0232212	DUSP4	-1340
chr1_108586186_108586931	17.9645	-0.881234	0.275555	-3.19803	0.00138369	0.0232269	AL390036.1	-24793
chr17_27224175_27224964	18.062	-0.953238	0.298251	-3.19609	0.00139304	0.0233662	DHRS13	5126
chr17_27224175_27224964.1	18.062	-0.953238	0.298251	-3.19609	0.00139304	0.0233662	FLOT2	0
chr17_27224175_27224964.2	18.062	-0.953238	0.298251	-3.19609	0.00139304	0.0233662	RP11-20B24.4	0
chr11_113931196_113932076	19.0744	-0.855743	0.267785	-3.19563	0.00139526	0.0233859	ZBTB16	-882
chr22_19165666_19166879	27.9532	-0.687535	0.215215	-3.19465	0.00140001	0.0234567	SLC25A1	0
chr1_145476795_145477574	21.7251	-0.877264	0.274639	-3.19425	0.00140196	0.0234629	LIX1L	0
chr1_145476795_145477574.1	21.7251	-0.877264	0.274639	-3.19425	0.00140196	0.0234629	RP11-315I20.1	30930
chr12_21809086_21811030	37.039	-0.616405	0.192969	-3.19432	0.00140161	0.0234629	LDHB	99736
chr17_80454760_80455799	23.6939	-0.834214	0.26121	-3.19365	0.00140486	0.0235025	NARF-IT1	-14787
chr8_129157160_129157785	17.6082	-0.751916	0.235463	-3.19336	0.00140628	0.0235174	MIR1208	4577
chr1_159146984_159147542	17.5515	-0.7447	0.233357	-3.19125	0.00141658	0.0236541	CADM3	-5586
chr16_68297836_68298896	34.2569	-0.633384	0.198507	-3.19073	0.00141911	0.0236615	SLC7A6	0
chr20_25677051_25677790	35.4311	-0.592596	0.185747	-3.19034	0.00142108	0.023676	ZNF337	0
chr20_17628689_17629978	38.4016	-0.621879	0.194948	-3.18997	0.00142286	0.0236901	RRBP1	32963
chr1_45805453_45806291	27.7187	-0.686142	0.21512	-3.18957	0.00142484	0.023708	MUTYH	0
chr1_45805453_45806291.1	27.7187	-0.686142	0.21512	-3.18957	0.00142484	0.023708	TOE1	-112
chr11_118972169_118973304	31.3148	-0.65558	0.205549	-3.1894	0.00142566	0.023708	DPAGT1	5738
chr17_47295356_47297028	34.9545	-0.636302	0.199616	-3.18763	0.00143443	0.023827	ABI3	-7768
chr3_44770838_44771344	26.9365	-0.889597	0.279076	-3.18766	0.00143431	0.023827	ZNF501	0
chr7_140372590_140373250	18.1212	-0.92967	0.291789	-3.1861	0.00144204	0.0239356	ADCK2	0
chr9_140778875_140779447	15.5394	-0.823576	0.258487	-3.18614	0.00144184	0.0239356	CACNA1B	-6635
chr9_140778875_140779447.1	15.5394	-0.823576	0.258487	-3.18614	0.00144184	0.0239356	RP11-188C12.3	7576
chr15_40762944_40764170	24.0052	-0.777125	0.244026	-3.1846	0.00144956	0.0240067	CHST14	0
chr7_35293458_35294136	23.2733	-0.80791	0.253829	-3.1829	0.0014581	0.0241303	TBX20	0
chr11_103580141_103580504	10.1512	-1.1448	0.359865	-3.1812	0.00146666	0.024238	RP11-563P16.1	185496
chr19_49241858_49242703	33.9043	-0.669062	0.21038	-3.18026	0.00147144	0.0242812	RASIP1	1276
chr6_30875573_30876156	28.4695	-0.719648	0.226372	-3.17905	0.0014776	0.0243577	GTF2H4	0
chr17_39822097_39823843	31.9421	-0.704147	0.221567	-3.17803	0.00148281	0.0244212	EIF1	21296
chr12_9600113_9601111	21.8311	-0.808452	0.254405	-3.17781	0.00148392	0.024422	SNORA75	-2460
chr6_30684501_30685689	42.3872	-0.599241	0.188571	-3.1778	0.00148396	0.024422	MDC1	0
chr12_119360193_119360634	10.3725	-1.09454	0.344558	-3.17666	0.00148984	0.0245007	RP11-357K6.3	-13458
chr10_6205430_6206304	31.5631	-0.671126	0.211354	-3.17537	0.00149647	0.0245914	PFKFB3	-18534
chrX_133594027_133594652	11.2488	-1.09738	0.345706	-3.17431	0.00150194	0.0246541	HPRT1	0
chr6_43196670_43197318	16.2552	-0.925574	0.291621	-3.17389	0.00150408	0.0246802	DNPH1	0
chr17_79924576_79926098	37.717	-0.603956	0.190355	-3.17278	0.00150985	0.0247565	RP11-498C9.17	-111
chr9_132459628_132460240	10.4641	-1.13656	0.358339	-3.17174	0.00151528	0.024809	PRRX2	-31709
chr7_23144954_23145792	35.542	-0.802894	0.253182	-3.17122	0.00151801	0.0248446	KLHL7-AS1	0
chr15_40659925_40660728	22.1537	-0.825767	0.260477	-3.17021	0.00152327	0.0249123	DISP2	-9490
chr7_114562112_114563812	35.7006	-0.61845	0.195138	-3.16929	0.00152813	0.0249735	MDFIC	0
chr11_110166466_110167781	30.5252	-0.637311	0.201112	-3.16894	0.00152996	0.0249941	RDX	0
chr7_2281421_2282161	17.6479	-0.791256	0.249734	-3.16839	0.00153285	0.0250322	FTSJ2	0
chr7_2281421_2282161.1	17.6479	-0.791256	0.249734	-3.16839	0.00153285	0.0250322	NUDT1	0
chr8_28351489_28352229	23.0308	-0.823152	0.25981	-3.16828	0.00153343	0.0250325	FZD3	0
chr1_38258783_38260026	22.51	-0.751222	0.237183	-3.16727	0.00153876	0.0251012	MANEAL	0
chr19_4077775_4078299	17.3004	-0.926017	0.292386	-3.16711	0.00153963	0.0251062	ZBTB7A	-10832
chr8_6691435_6693162	42.7839	-0.598811	0.189107	-3.16652	0.00154276	0.0251296	GS1-24F4.2	0
chr8_6691435_6693162.1	42.7839	-0.598811	0.189107	-3.16652	0.00154276	0.0251296	XKR5	5
chr12_54411634_54412341	17.4627	-0.756082	0.238787	-3.16634	0.0015437	0.0251357	HOXC6	-1954
chr12_54411634_54412341.1	17.4627	-0.756082	0.238787	-3.16634	0.0015437	0.0251357	RP11-834C11.12	-32006
chr12_54411634_54412341.2	17.4627	-0.756082	0.238787	-3.16634	0.0015437	0.0251357	RP11-834C11.14	-741
chr6_144536804_144537889	30.9639	-0.643379	0.203236	-3.16568	0.00154722	0.0251745	STX11	-65142
chr3_58652340_58652967	11.9011	-1.04356	0.329694	-3.16523	0.00154959	0.025188	FAM3D	0
chr10_72575519_72575978	12.3576	-1.07191	0.338733	-3.16446	0.00155371	0.0252432	SGPL1	0
chr19_19083166_19083728	24.0872	-0.794262	0.251013	-3.16423	0.00155495	0.025253	RN7SL70P	-14099
chr7_100209533_100210185	22.7758	-0.787431	0.249031	-3.16198	0.001567	0.0253951	MOSPD3	0
chr7_97881211_97881909	23.1915	-0.756583	0.239368	-3.16076	0.0015736	0.0254732	TECPR1	0
chr1_3087119_3088137	24.0541	-0.689312	0.218207	-3.15897	0.00158326	0.0255832	PRDM16	-101388
chr16_87799200_87799980	35.8896	-0.677364	0.214415	-3.15913	0.0015824	0.0255832	KLHDC4	0
chr17_64825575_64826261	13.3898	-0.941809	0.298132	-3.15903	0.00158293	0.0255832	CACNG5	4974
chr5_134369211_134370635	25.5304	-0.715191	0.226525	-3.15723	0.00159274	0.0256899	CTC-349C3.1	-242
chr5_134369211_134370635.1	25.5304	-0.715191	0.226525	-3.15723	0.00159274	0.0256899	PITX1	0
chr5_78279234_78281391	43.3869	-0.588762	0.186519	-3.15658	0.00159631	0.025738	BHMT2	84199
chr3_184301004_184301703	13.6852	-0.986826	0.312729	-3.15553	0.00160205	0.0258119	EIF2B5	-447953
chr7_19748394_19748980	44.5982	-0.770144	0.244165	-3.1542	0.00160941	0.0259212	TWISTNB	0
chr11_3875560_3877048	33.7155	-0.668674	0.212124	-3.15227	0.00162004	0.0260171	AC090587.4	0
chr11_3875560_3877048.1	33.7155	-0.668674	0.212124	-3.15227	0.00162004	0.0260171	AC090587.5	0
chr11_3875560_3877048.2	33.7155	-0.668674	0.212124	-3.15227	0.00162004	0.0260171	STIM1	0
chr10_135192113_135192885	22.8241	-0.791706	0.251202	-3.15167	0.00162341	0.0260475	AL360181.1	218
chr10_135192113_135192885.1	22.8241	-0.791706	0.251202	-3.15167	0.00162341	0.0260475	PAOX	0
chr16_67281168_67281675	15.6432	-0.960037	0.304617	-3.15162	0.00162369	0.0260475	FHOD1	0
chr17_7461279_7462326	29.6858	-0.633224	0.200931	-3.15144	0.00162465	0.0260536	TNFSF12-TNFSF13	-8864
chr17_7461279_7462326.1	29.6858	-0.633224	0.200931	-3.15144	0.00162465	0.0260536	TNFSF13	0
chr16_46917354_46918593	35.2497	-0.606877	0.192616	-3.15071	0.00162876	0.02611	GPT2	0
chr17_40718735_40719608	24.6641	-0.745938	0.236832	-3.14965	0.00163467	0.0261765	MLX	0
chr1_24648207_24648663	15.7844	-0.892118	0.283279	-3.14926	0.00163686	0.0262021	GRHL3	-2396
chr1_24648207_24648663.1	15.7844	-0.892118	0.283279	-3.14926	0.00163686	0.0262021	RP11-10N16.3	0
chr2_71114514_71115246	15.6934	-0.799695	0.253962	-3.14887	0.00163903	0.0262126	AC007040.5	0
chr16_2264117_2265502	30.0168	-0.700181	0.222512	-3.14671	0.00165116	0.0263741	PGP	0
chr8_142526430_142527234	22.6362	-0.658951	0.209441	-3.14624	0.00165386	0.0263983	AC138647.1	-1693
chr8_143330687_143331256	23.0229	-0.759892	0.241555	-3.14583	0.00165614	0.0264158	TSNARE1	153346
chr13_77459268_77460989	34.9677	-0.619499	0.196945	-3.14554	0.00165781	0.0264231	AC000403.1	0
chr13_77459268_77460989.1	34.9677	-0.619499	0.196945	-3.14554	0.00165781	0.0264231	KCTD12	0
chr5_176852768_176854247	38.5099	-0.594183	0.188952	-3.14462	0.00166303	0.0264877	GRK6	0
chr6_31869355_31870378	26.9392	-0.686701	0.218391	-3.14437	0.00166444	0.0264912	C2	-3794
chr6_31869355_31870378.1	26.9392	-0.686701	0.218391	-3.14437	0.00166444	0.0264912	ZBTB12	0
chr8_130690955_130692126	30.8391	-0.640972	0.203878	-3.1439	0.00166714	0.0265152	CCDC26	360
chr8_130690955_130692126.1	30.8391	-0.640972	0.203878	-3.1439	0.00166714	0.0265152	RP11-419K12.1	3800
chr16_15489471_15490474	24.2082	-0.727905	0.231618	-3.14269	0.00167403	0.0265962	MPV17L	0
chr16_15489471_15490474.1	24.2082	-0.727905	0.231618	-3.14269	0.00167403	0.0265962	RP11-1021N1.1	0
chr19_41084436_41084752	11.081	-1.16126	0.369612	-3.14184	0.00167888	0.0266543	SHKBP1	-1680
chr20_1959877_1960366	10.1136	-1.24392	0.396073	-3.14062	0.00168588	0.0267464	PDYN	14338
chr20_1959877_1960366.1	10.1136	-1.24392	0.396073	-3.14062	0.00168588	0.0267464	RP4-684O24.5	-31986
chr17_75449848_75450391	16.5379	-0.91169	0.290391	-3.13953	0.00169219	0.0268369	2020-09-09	-172357
chr3_138327328_138328585	28.7131	-0.622505	0.198316	-3.13895	0.00169553	0.026862	FAIM	0
chr9_97401426_97402223	22.6909	-0.755251	0.240607	-3.13894	0.00169558	0.026862	FBP1	0
chr16_3199484_3201029	36.1507	-0.592658	0.188866	-3.13797	0.00170121	0.0269085	CASP16	-5265
chr3_38035313_38036117	28.8807	-0.625686	0.199526	-3.13586	0.00171351	0.0270593	VILL	-5764
chr19_43105857_43106523	20.3116	-0.74932	0.239016	-3.13502	0.00171842	0.0271177	LIPE-AS1	-204578
chr8_94712435_94713681	39.7186	-0.605753	0.193278	-3.13411	0.00172377	0.0271732	LINC00535	0
chr1_231376583_231377391	25.2983	-0.615692	0.196487	-3.13351	0.00172732	0.0271995	C1orf131	0
chr1_231376583_231377391.1	25.2983	-0.615692	0.196487	-3.13351	0.00172732	0.0271995	GNPAT	0
chr4_103997246_103998095	25.1211	-0.720571	0.229964	-3.13341	0.00172788	0.0271995	SLC9B2	0
chr16_3073837_3074528	25.4515	-0.702884	0.22438	-3.13257	0.00173284	0.0272678	HCFC1R1	0
chr16_3073837_3074528.1	25.4515	-0.702884	0.22438	-3.13257	0.00173284	0.0272678	THOC6	0
chr1_203144563_203145424	28.0774	-0.696553	0.222415	-3.13177	0.00173756	0.0273132	MYBPH	0
chr19_33717744_33718114	10.8175	-1.29684	0.414442	-3.12913	0.00175324	0.0275065	SLC7A10	-988
chr5_134760945_134761909	25.2603	-0.75617	0.241738	-3.12806	0.00175967	0.0275634	C5orf20	21130
chr10_126336409_126337681	27.3726	-0.694973	0.222234	-3.12722	0.00176469	0.0276065	RP11-12J10.3	142616
chr9_139928661_139929359	16.2698	-0.978611	0.312976	-3.12679	0.00176723	0.0276314	C9orf139	-6746
chr22_43547157_43547864	14.9925	-0.979394	0.313297	-3.12609	0.00177148	0.0276609	TSPO	0
chr1_11779166_11780038	26.7802	-0.636523	0.203682	-3.12509	0.00177754	0.0277359	DRAXIN	-27381
chr16_1542470_1543979	34.7143	-0.586184	0.187596	-3.12471	0.00177979	0.0277614	TELO2	0
chr12_132413359_132414838	30.3138	-0.610088	0.195398	-3.12229	0.00179452	0.0279128	PUS1	0
chr12_132413359_132414838.1	30.3138	-0.610088	0.195398	-3.12229	0.00179452	0.0279128	RP11-417L19.4	0
chr14_76599167_76599785	13.1966	-0.912704	0.292418	-3.12123	0.001801	0.0279941	GPATCH2L	18480
chr19_16242447_16242921	10.5406	-1.02045	0.326986	-3.12078	0.00180371	0.0280014	CTD-2231E14.8	7782
chr19_16242447_16242921.1	10.5406	-1.02045	0.326986	-3.12078	0.00180371	0.0280014	RAB8A	-20009
chr22_28007928_28008551	17.2182	-0.945491	0.303067	-3.11974	0.0018101	0.0280768	RP1-231P7P.1	-38394
chr21_46221278_46222081	18.8005	-0.848279	0.271936	-3.11941	0.00181215	0.0280987	UBE2G2	0
chr7_27135337_27136754	30.053	-0.690972	0.221538	-3.11898	0.00181478	0.0281297	HOTAIRM1	0
chr7_27135337_27136754.1	30.053	-0.690972	0.221538	-3.11898	0.00181478	0.0281297	HOXA1	0
chr10_105038272_105039050	14.0461	-0.943269	0.302502	-3.11823	0.00181941	0.0281917	INA	-1353
chr1_859028_860479	30.2782	-0.668169	0.214491	-3.11514	0.00183856	0.0284282	SAMD11	639
chr3_194117367_194118165	14.6789	-1.16945	0.375443	-3.11484	0.00184042	0.0284282	GP5	919
chr1_175694612_175695262	16.8275	-0.78618	0.252512	-3.11344	0.00184921	0.0285342	TNR	17645
chr1_234845350_234846063	16.9663	-0.885591	0.284554	-3.11221	0.00185693	0.0286137	RP4-781K5.7	-216
chrX_39968117_39969258	17.5368	-0.787798	0.25323	-3.111	0.00186455	0.0286913	BCOR	67325
chr10_80896956_80898234	35.4816	-0.607695	0.195457	-3.10909	0.00187665	0.0288381	ZMIZ1	-68165
chr17_42466969_42467746	20.7388	-0.783053	0.251841	-3.10932	0.00187521	0.0288381	ITGA2B	-96
chr18_52613513_52613848	12.2771	-1.13285	0.364411	-3.10872	0.00187901	0.0288441	CCDC68	12892
chr6_1614890_1615388	11.0855	-1.12023	0.360347	-3.10876	0.00187877	0.0288441	FOXC1	-4210
chr10_71077770_71079085	28.6315	-0.729251	0.234614	-3.1083	0.00188168	0.0288652	HK1	0
chr2_58468271_58468728	13.9596	-1.02628	0.330172	-3.10831	0.00188161	0.0288652	RP11-334G22.1	0
chr1_40915428_40916975	34.3147	-0.65243	0.209914	-3.10809	0.00188301	0.0288757	ZFP69B	0
chrX_24711584_24712336	38.2095	-0.682085	0.219475	-3.10781	0.00188479	0.028893	POLA1	0
chr4_17513228_17514066	17.8175	-0.877105	0.282295	-3.10706	0.00188961	0.0289569	QDPR	0
chr11_45825628_45827103	32.2492	-0.592251	0.190715	-3.10543	0.00190006	0.0290669	SLC35C1	-6
chr17_73760579_73761506	24.6175	-0.765088	0.246415	-3.10488	0.00190358	0.0290954	GALK1	287
chr9_134129407_134130057	18.5235	-0.843174	0.271568	-3.10483	0.00190387	0.0290954	FAM78A	21878
chr17_79848723_79850015	44.9185	-0.742012	0.239011	-3.10451	0.00190596	0.0291173	ALYREF	0
chr17_79848723_79850015.1	44.9185	-0.742012	0.239011	-3.10451	0.00190596	0.0291173	ANAPC11	-58
chr17_235409_236008	13.5329	-0.990611	0.319104	-3.10436	0.00190693	0.029122	C17orf97	24120
chr22_50765232_50766193	28.54	-0.622274	0.200476	-3.10398	0.00190933	0.0291388	DENND6B	0
chr3_46277699_46278281	14.5164	-1.01979	0.328664	-3.10283	0.00191678	0.0292221	CCR3	-72604
chr8_91789416_91789859	12.0667	-1.16686	0.376221	-3.10153	0.00192522	0.0292808	TMEM64	14001
chr15_70770806_70771584	15.8274	-0.880784	0.284235	-3.09879	0.00194315	0.0294816	RP11-96C21.1	26684
chr1_173683717_173684493	24.204	-0.683965	0.220807	-3.09757	0.00195114	0.029564	KLHL20	0
chr7_100449863_100450577	14.2919	-1.00785	0.325574	-3.0956	0.00196415	0.0296861	RP11-126L15.4	0
chr7_100449863_100450577.1	14.2919	-1.00785	0.325574	-3.0956	0.00196415	0.0296861	SLC12A9	0
chr20_25228320_25229435	29.721	-0.686828	0.22192	-3.09494	0.00196852	0.0297362	PYGB	0
chr17_27453454_27453920	12.0074	-1.14066	0.368689	-3.09382	0.00197598	0.0298286	MYO18A	53511
chr8_21946543_21947380	20.053	-0.817046	0.264262	-3.09181	0.00198943	0.029991	FAM160B2	0
chr1_156307852_156308843	33.3012	-0.626445	0.202733	-3.09	0.00200155	0.0301129	CCT3	0
chr1_156307852_156308843.1	33.3012	-0.626445	0.202733	-3.09	0.00200155	0.0301129	TSACC	-748
chr5_127418590_127419711	30.145	-0.659289	0.21339	-3.08959	0.00200434	0.0301129	CTC-228N24.3	0
chr5_127418590_127419711.1	30.145	-0.659289	0.21339	-3.08959	0.00200434	0.0301129	SLC12A2	0
chr2_173292020_173292879	18.0648	-0.960533	0.310953	-3.08899	0.00200835	0.0301436	AC078883.4	453
chr2_173292020_173292879.1	18.0648	-0.960533	0.310953	-3.08899	0.00200835	0.0301436	ITGA6	0
chr20_42697437_42698724	30.7131	-0.668996	0.21659	-3.08876	0.00200991	0.0301567	TOX2	-153934
chr19_52056395_52056852	14.7565	-0.81253	0.263182	-3.08733	0.00201964	0.0302824	ZNF175	19729
chr9_35664910_35665454	20.9683	-0.930146	0.301327	-3.08684	0.00202298	0.030312	ARHGEF39	0
chr14_105642356_105643173	20.3565	-0.887847	0.287644	-3.08661	0.00202451	0.0303247	NUDT14	4468
chr14_105642356_105643173.1	20.3565	-0.887847	0.287644	-3.08661	0.00202451	0.0303247	RP11-44N21.4	4359
chr11_67070315_67071496	24.5235	-0.693337	0.224748	-3.08495	0.00203584	0.0304535	SSH3	0
chr3_48130035_48130929	28.1054	-0.744585	0.241372	-3.0848	0.00203691	0.0304592	MAP4	0
chr10_103824664_103825921	42.2682	-0.601494	0.195013	-3.08439	0.00203971	0.0304615	HPS6	0
chr4_54231591_54232583	36.6768	-0.651453	0.211209	-3.0844	0.0020396	0.0304615	SCFD2	0
chr1_47081990_47082650	16.0032	-0.983663	0.319017	-3.08342	0.00204635	0.0305046	MOB3C	0
chr11_64889259_64890018	36.8216	-0.717942	0.232829	-3.08355	0.00204544	0.0305046	FAU	0
chr11_64889259_64890018.1	36.8216	-0.717942	0.232829	-3.08355	0.00204544	0.0305046	MRPL49	0
chr14_105559484_105560403	19.3502	-0.849989	0.275646	-3.08363	0.00204492	0.0305046	RP11-44N21.1	1125
[truncated: 808 more rows]

## Sheet: ChIPseqDEseq2CRYBMIM-PBS4hMYBup
region	baseMean	log2FoldChange	lfcSE	stat	pvalue	padj	gene	distance
[truncated: 1,006 more rows]

[truncated: 3 more sheets: ChIPseqDEseq2CRYBMIM-PBS4hMYBdn, ChIPseqDEseq2CRYBMIM-PBS4hCBPup, ChIPseqDEseq2CRYBMIM-PBS4hCBPdn]
