# Supplementary material for: Convergent organization of aberrant MYB complex controls oncogenic gene expression in acute myeloid leukemia
Source: eLife. 2021 Feb 2;10:e65905. doi: 10.7554/eLife.65905 (PMC7886351; doi:10.7554/eLife.65905)
Supplement: Figure 7—source data 1. [file elife-65905-fig7-data1.xlsx]

## Sheet: IP-MS_MYBvsIgG
Gene names	LFQ Intensity IgG Tryp1	LFQ Intensity IgG Tryp2	LFQ Intensity IgG Tryp3	LFQ Intensity IP MYB Tryp1	LFQ Intensity IP MYB Tryp2	LFQ Intensity IP MYB Tryp3	LFQ IgG Tryp Average	LFQ IP MYB Tryp Average	log2ratio (MYB/IgG)	-log(p-value)	CRISPR dependency score (DepMap)	Normal BM expression (TCGA)
RBMX	66063	73497	87652	180680000	170090000	181900000	75737.3	1.77557e+08	11.195	5.92366	-1.469	6191.2
ACIN1	22918	16096	0	27060000	31225000	27934000	13004.7	2.87397e+07	11.1098	4.64808	-2.117	7972.8
MYO1G	0	0	0	29659000	29908000	24282000	16000	2.79497e+07	10.7705	3.96496	-0.758	2201.8
SRSF7	49399	49734	52905	86508000	81795000	81033000	50679.3	83112000	10.6794	5.96647	-1.866	8638.2
SRSF2	0	87237	130520	99734000	106320000	116220000	72585.7	1.07425e+08	10.5314	4.62906	-2.721	3818
CBFB	0	0	0	18218000	22761000	20890000	16000	20623000	10.332	4.01103	-3.272	991
SRRM2	182290	213720	288150	304710000	307450000	269250000	228053	2.93803e+08	10.3313	4.73787	-2.269	53064.6
MYB	0	0	0	15087000	13393000	31759000	16000	2.00797e+07	10.2934	1.57478	-2.659	14135.6
SRSF5	0	0	0	12251000	22844000	23271000	16000	1.94553e+07	10.2479	2.2441	-1.056	13478
SRSF1	191500	210150	357820	308040000	301480000	300140000	253157	303220000	10.2261	7.59705	-3.091	2795.4
SRSF6	88029	107110	0	82463000	42628000	83572000	65046.3	6.95543e+07	10.0625	2.17404	-0.363	5741.2
SRSF10	0	0	0	14597000	17464000	13952000	16000	1.53377e+07	9.90479	3.84644	-1.127	111526
RPL21	0	0	0	11280000	16487000	13817000	16000	1.38613e+07	9.75878	3.1142	0	111526
RPL26	0	0	0	10923000	14894000	14608000	16000	13475000	9.718	3.33856	-2.068	24405.8
PGAM5	0	138630	0	28412000	41709000	44602000	46210	38241000	9.6927	2.80693	0.222	604.2
ARHGEF6	0	0	0	10515000	15384000	12610000	16000	1.28363e+07	9.64795	3.09276	-0.041	4346.8
TRA2B	240280	182920	0	122140000	101020000	108380000	141067	1.10513e+08	9.61363	4.23562	-1.469	7185.4
TCF3	0	0	0	8637400	9601100	18020000	16000	1.20862e+07	9.56107	1.81245	-2.373	1807
GIT2	0	0	0	17166000	9841200	8783400	16000	11930200	9.54233	1.97446	-0.155	2247
SRRM1	0	0	0	9169800	13055000	13299000	16000	1.18413e+07	9.53154	3.04622	-1.622	4413.6
THRAP3	69625	92483	94288	71516000	48533000	63956000	85465.3	61335000	9.48716	3.08425	0.002	5561
RPA1	0	67369	0	17017000	15154000	15190000	22456.3	15787000	9.4574	4.86007	-1.714	4684.8
TFAM	0	0	0	10112000	10739000	10790000	16000	10547000	9.36455	5.96179	-1.244	1338.4
SRSF9	0	136300	0	16356000	33320000	35700000	45433.3	2.84587e+07	9.2909	2.01991	-0.036	3722.6
EIF4A3	75075	53921	111040	45101000	53400000	51061000	80012	49854000	9.28328	4.44574	-2.496	3364.2
BCLAF1	65286	132600	0	46623000	39059000	36505000	65962	40729000	9.27021	3.74425	-0.374	9151
NCBP1	0	0	0	7494200	12586000	9042300	16000	9707500	9.24488	2.52453	-1.421	2335.4
PML	0	0	0	7678000	10562000	9585600	16000	9275200	9.17916	3.40361	-0.303	748
WTAP	0	0	0	9342800	10697000	5594200	16000	8.54467e+06	9.06081	2.30139	-1.608	1868.6
ZC3H18	0	0	0	7356100	8595600	8252100	16000	8.06793e+06	8.97798	4.58462	-1.906	1422.2
XRCC1	0	0	0	10820000	4346600	9010600	16000	8.05907e+06	8.9764	1.85617	-1.477	1353.2
MTA2	0	0	0	7446500	8443000	7807400	16000	7.89897e+06	8.94745	4.95878	-0.103	6264.2
RPL37A	0	0	0	8118500	8889500	6205400	16000	7737800	8.91771	3.19876	-2.952	37800.4
RPL3	54452	16434	42215	15259000	22709000	14887000	37700.3	1.76183e+07	8.86828	2.63592	-4.084	73995.6
RFC4	0	0	0	9488400	4987500	7309000	16000	7.26163e+06	8.82608	2.29833	-1.343	2105.2
SSBP1	0	0	0	6111000	6722400	8294200	16000	7.04253e+06	8.78188	3.38475	-0.92	2666.2
RFC2	0	0	0	7136800	6876600	6995100	16000	7.00283e+06	8.77372	7.09811	-2.302	1576
TRA2A	0	0	0	7543000	6529800	6186100	16000	6.75297e+06	8.72131	4.11069	0.137	3001.6
RBBP4	0	0	0	7627100	6801100	4973200	16000	6.46713e+06	8.65891	2.92861	-0.846	5396.4
RFC3	0	0	0	6519400	6259300	6138900	16000	6.30587e+06	8.62248	6.22051	-2.564	1180.8
RPA2	0	0	0	6928700	6158200	5571400	16000	6.21943e+06	8.60257	4.0307	-1.886	1484.2
RPL10	0	0	0	6983600	5967200	5019600	16000	5.99013e+06	8.54837	3.34255	-2.512	19761.8
RPL18A	0	0	0	5898100	6744000	4561800	16000	5.73463e+06	8.48549	3.07887	-3.035	3210.4
DDX17	172090	108920	130070	47583000	55960000	38075000	137027	47206000	8.42837	3.09413	-1.581	15371
ARHGEF7	0	0	0	7380600	2222100	6580700	16000	5.39447e+06	8.39726	1.55033	-0.041	1480.2
RALY	0	0	0	4986100	6156100	4814400	16000	5.31887e+06	8.3769	3.64374	-0.366	3027
SNRPD3	0	0	0	5331500	4893100	5424000	16000	5216200	8.34878	5.23747	-2.701	3353.6
RFC5	0	0	0	5205600	5453700	4934100	16000	5197800	8.34369	5.38263	-2.722	1247.2
RPL30	0	0	0	6583800	5277200	3601000	16000	5154000	8.33148	2.40301	-2.664	31955.2
SSBP3	0	0	0	5674900	5553800	4228200	16000	5152300	8.331	3.4292	-0.209	1007
SKIV2L2	0	0	0	4581000	5563000	4080700	16000	4.74157e+06	8.21115	3.39413	-1.875	3439.6
RPL9	0	0	0	5511500	5104000	3578900	16000	4.73147e+06	8.20807	2.8873	-3.305	1242.4
TCF12	0	0	0	4634100	5285100	3967100	16000	4.62877e+06	8.17641	3.58168	-0.33	2287.2
XAB2	0	0	0	4449000	4904400	4463700	16000	4605700	8.1692	5.18055	-2.668	1113.2
CTBP1	0	0	0	4411600	5432400	3298400	16000	4380800	8.09698	2.68433	-0.762	1161.6
SNRNP40	0	47430	0	6371400	2985200	3391800	15810	4.24947e+06	8.0703	1.77995	-0.925	1695.6
MYH9	375220	982990	231220	170000000	135940000	117600000	529810	141180000	8.05784	3.10331	-2.356	19487
RPL13A	0	0	0	3498600	4112000	4916700	16000	4.17577e+06	8.02783	3.27856	-2.231	111526
HOXA10	0	0	0	4280300	4168500	3836500	16000	4095100	7.99968	5.17508	-2.506	164.4
LMO2	0	0	0	5489400	4864500	1890900	16000	4081600	7.99492	1.67235	-0.636	1854.8
LDB1	0	0	0	4479800	4261700	3464800	16000	4.06877e+06	7.99038	3.71927	-1.219	5820.4
RBM8A	0	0	0	3142100	4339500	4474500	16000	3.98537e+06	7.9605	3.14859	-2.247	1624.2
ATF2	0	0	0	4419800	5230800	1694000	16000	3.78153e+06	7.88476	1.61764	0.15	1249.8
LIG3	0	0	0	3222500	3352800	4311300	16000	3.62887e+06	7.8253	3.3438	-2.054	1723.6
NELFB	0	0	0	3832900	3972600	3070300	16000	3.62527e+06	7.82387	3.68523	-4.31	111526
U2SURP	0	0	0	2830000	4131000	3801400	16000	3.58747e+06	7.80875	3.10806	-2.036	7314.8
NO66	0	0	0	3746700	3693300	3279900	16000	3573300	7.80304	4.76379	0	111526
DDX5	174420	287340	255220	57551000	48878000	48767000	238993	51732000	7.75794	4.22254	-0.665	40664.4
SNRNP200	55545	74703	40176	13864000	13121000	9415300	56808	1.21334e+07	7.73868	3.03193	-3.359	21184.4
SRSF4	0	0	0	3368600	2458500	3785600	16000	3.20423e+06	7.64576	2.91451	-0.695	3475.6
PLRG1	0	0	0	3427800	2925200	3203300	16000	3.18543e+06	7.63727	4.59071	-1.237	1793.6
HNRNPUL1	170010	106210	0	18507000	22559000	12286000	92073.3	17784000	7.59358	2.38985	-0.396	9666
CREB1	0	0	0	4032700	4530200	579830	16000	3.04758e+06	7.57345	1.15372	-0.768	1043.2
SNRPA	0	0	0	3369900	2907700	2836400	16000	3038000	7.56891	4.26775	-0.934	2695.4
CBFB	0	0	0	4292000	3345900	1446500	16000	3.02813e+06	7.56421	1.65033	0	111526
NMNAT1	0	0	0	2341300	2829100	3842600	16000	3.00433e+06	7.55283	2.61079	-0.145	168.4
VRK3	0	0	0	2886300	3279800	2434500	16000	2.86687e+06	7.48526	3.52114	-0.023	1189.8
RPL10A	93449	162490	96946	25513000	22590000	15098000	117628	21067000	7.48461	2.60115	-1.757	21611.4
PBX3	0	0	0	3011600	2547400	2961400	16000	2.84013e+06	7.47174	4.37269	-0.52	540.6
THOC6	0	0	0	2703700	3030400	2664100	16000	2799400	7.4509	4.75627	-0.907	1316
THOC2	0	0	0	3198500	2306600	2868600	16000	2.79123e+06	7.44669	3.36752	-1.88	4859.2
KDM1A	0	0	0	3391500	4091200	852870	16000	2.77852e+06	7.4401	1.32222	-1.205	5661.4
CHTOP	0	0	0	3040900	3198300	2042300	16000	2760500	7.43071	2.79935	-0.917	1055.4
SLC12A4	0	0	0	2596900	2794300	2828900	16000	2.74003e+06	7.41998	5.53928	-0.159	998
SNRPA1	0	0	0	2590800	2798300	2800600	16000	2729900	7.41463	5.59905	-1.323	1505
GIT1	0	0	0	2621500	2895000	2614200	16000	2.71023e+06	7.4042	5.09441	-0.273	1536.4
ZCCHC8	0	0	0	2519600	2999400	2531200	16000	2683400	7.38985	4.15155	-0.374	1295.2
LACTB	0	0	0	2430000	2756100	2611700	16000	2.59927e+06	7.34389	4.98624	-0.29	381.6
PRPF6	0	0	0	2426300	2796900	2572800	16000	2.59867e+06	7.34356	4.75595	-2.288	4392
CLTC	0	0	0	3246400	2246900	2158000	16000	2.55043e+06	7.31653	2.7297	-1.264	11881.2
THOC1	0	0	0	2342300	2860900	2299700	16000	2.50097e+06	7.28827	3.80438	-1.295	2496
SRSF3	335640	239240	176810	28992000	40498000	47317000	250563	3.89357e+07	7.27977	2.7128	-2.628	9000.4
CLK3	0	0	0	2165900	2512700	2613900	16000	2.43083e+06	7.24724	4.24416	-1.805	1097.6
HDAC1	0	0	0	3091800	2381400	1678900	16000	2.38403e+06	7.21919	2.36933	0.451	4241
SATB2	0	0	0	3212000	2536700	1331700	16000	2.36013e+06	7.20465	1.89521	-0.357	9.6
ARPC4	0	0	0	2515900	2570000	1963200	16000	2349700	7.19826	3.57523	-1.428	1551.8
NELFA	0	0	0	2072600	2607200	2325400	16000	2.33507e+06	7.18925	3.953	-0.97	111526
RCOR1	0	0	0	2933000	2027300	1945200	16000	2.30183e+06	7.16857	2.72164	-1.948	959.6
RNPS1	0	0	0	3059600	2327400	1440100	16000	2275700	7.15209	2.0821	-1.164	1888.2
RPA3	0	0	0	3303000	2090300	1342900	16000	2245400	7.13276	1.7675	-1.26	925.4
NCBP2	0	0	0	2646300	1973100	2062800	16000	2227400	7.12114	3.3411	-3.001	950.4
HAX1	0	0	0	0	3079400	3557100	16000	2.21217e+06	7.11124	0.927481	-0.218	1600.8
CLK2	0	0	0	2415300	2047100	2129700	16000	2.19737e+06	7.10156	4.40708	-0.337	2303
LUC7L2	0	0	0	2380900	2586500	1609500	16000	2192300	7.09823	2.74367	0.024	4493.8
CAPZB	0	0	0	2090000	2477500	1936900	16000	2.16813e+06	7.08224	3.75603	-2.006	3733.4
SATB1	0	0	0	2497700	2799400	1126400	16000	2.14117e+06	7.06418	1.84911	-1.419	4083.6
SMU1	0	0	0	2101000	2292200	1985100	16000	2126100	7.05399	4.72931	-2.795	2132.4
NELFE	0	0	0	1936000	2137900	2296300	16000	2123400	7.05216	4.46442	-0.567	111526
FMR1	0	0	0	2175500	1607000	2410800	16000	2.06443e+06	7.01153	3.00816	-0.593	1084
TLN1	0	0	0	2168400	2062200	1902300	16000	2044300	6.99739	4.91463	0.096	25704.2
SNRPE	0	0	0	2058900	2218400	1839700	16000	2039000	6.99365	4.30588	-2.305	2048.6
SAP18	0	284740	239470	20839000	25649000	20084000	174737	2.21907e+07	6.98863	3.64351	-1.627	2475.4
SNRPD1	0	0	0	2419300	2371700	1269900	16000	2020300	6.98035	2.23921	-2.529	2117.6
CDC40	0	0	0	1948400	2275500	1799400	16000	2.00777e+06	6.97138	3.85474	-1.321	1027.8
SRRT	0	260140	0	10842000	11142000	10228000	86713.3	1.07373e+07	6.95217	5.52857	-2.991	6462.8
PPIL1	0	0	0	1878800	2453900	1548800	16000	1960500	6.93701	2.75284	-1.368	523.4
CBLL1	0	0	0	2061400	2125600	1611400	16000	1932800	6.91648	3.55107	-0.167	1710.8
ATAD3B	0	0	0	1584600	2131200	2057900	16000	1.92457e+06	6.91032	3.44679	-0.219	335.8
CTSG	0	0	0	2100800	1782600	1880500	16000	1921300	6.90787	4.46889	-0.713	10026.4
HNRNPF	0	0	0	1975600	1670300	2054700	16000	1900200	6.89194	4.07233	-0.695	8095.6
GPATCH8	0	0	0	1689800	2176900	1816200	16000	1894300	6.88745	3.69199	0.586	2719.8
DDX39B	0	0	0	1792300	2007600	1841800	16000	1.88057e+06	6.87695	5.06803	-0.812	111526
SNW1	144550	0	0	7368100	6019600	3376700	48183.3	5.58813e+06	6.85769	2.03819	-0.865	2898.8
CDK11B;CDK11A	0	0	0	1558000	2152100	1840800	16000	1850300	6.85354	3.37757	-0.754	448.4
RPL17	0	262170	0	10156000	8051100	12043000	87390	1.00834e+07	6.85029	3.00673	-1.935	94.4
U2AF2	0	0	0	1704200	2412600	1267800	16000	1.79487e+06	6.80966	2.23915	-2.444	4886.6
TECR	0	0	0	2439200	1589100	1316600	16000	1.78163e+06	6.79898	2.2068	-1.394	1325.6
PCBP2;PCBP3	0	0	0	2277000	1861700	1174500	16000	1.77107e+06	6.7904	2.27605	-1.254	16705.4
MYO18A	0	0	0	1708900	1864400	1725200	16000	1.76617e+06	6.78641	5.43938	-0.805	9573.4
RUVBL1	0	0	0	2326200	1669100	1296400	16000	1763900	6.78455	2.37324	-3.323	2341.6
NOP2	0	0	0	1433100	2070400	1753600	16000	1.75237e+06	6.77509	3.16858	-1.904	3399
RUVBL2	0	0	0	1826900	1801900	1616400	16000	1748400	6.77182	4.90808	-2.63	2485.6
ISY1	0	0	0	1646000	1830000	1759300	16000	1745100	6.76909	5.27556	-1.142	78.6
RBM22	0	0	0	1415600	2015900	1764400	16000	1.73197e+06	6.7582	3.24201	-2.174	1746
BANF1	0	0	0	1548400	1897100	1741300	16000	1.72893e+06	6.75567	4.16803	-1.178	1697
RBM14	650290	0	0	11986000	34435000	22927000	216763	23116000	6.73663	1.61612	-2.78	1491.8
SAP30BP	0	0	0	1709200	1736900	1665200	16000	1.70377e+06	6.73451	6.86937	-1.203	1300.2
BCAS2	0	0	0	2209800	1245900	1462000	16000	1.63923e+06	6.67881	2.30546	-0.815	815.6
RPL27	0	0	278350	8039700	8785800	11341000	92783.3	9.38883e+06	6.66094	3.12138	-1.824	23313.6
RPL34	0	0	304530	11202000	10666000	8669900	101510	10179300	6.64787	3.69052	-2.054	24553.8
ARPC1B	0	0	0	1761900	1383000	1667500	16000	1.60413e+06	6.64758	3.83154	-0.471	2907.6
TFCP2	0	0	0	2214900	945960	1538100	16000	1566320	6.61316	1.88868	0.119	1325
SUN2	0	0	0	1664200	1573600	1411300	16000	1549700	6.59777	4.51301	-0.676	3418.8
SSFA2	0	0	0	1592900	1578500	1448600	16000	1540000	6.58871	5.32768	0.179	4003.8
SLC25A11	0	0	0	1572500	1609900	1433700	16000	1538700	6.5875	5.05735	-0.16	896.2
PRPF8	230640	72973	105970	15995000	12954000	10410000	136528	1.31197e+07	6.58639	2.88611	-3.214	24717
PNKP	0	0	0	1568600	1414100	1564400	16000	1515700	6.56577	5.1236	-1.783	996.2
DNAJC9	0	0	0	1494900	1855800	1180800	16000	1510500	6.56081	2.82487	-2.206	1891
DDX18	0	0	0	1606500	1346400	1568300	16000	1.50707e+06	6.55753	4.30692	-1.543	3497
RPL36AL	0	0	0	1247200	1295700	1963100	16000	1502000	6.55267	2.53981	-1.551	3989.6
FXR2	0	0	0	1528200	1391000	1565700	16000	1.49497e+06	6.5459	5.02369	-0.187	695.2
RPL4	146080	126380	162520	16307000	9098900	14981000	144993	13462300	6.53679	2.41412	-2.912	60145.4
RUNX2	0	0	0	2050000	1201100	1166300	16000	1.47247e+06	6.52402	2.15479	-1.267	1008.4
RBMXL1	0	0	0	1384400	1313400	1706300	16000	1.46803e+06	6.51967	3.5787	-0.151	298.6
RPLP0;RPLP0P6	122150	633720	316300	25439000	39675000	32323000	357390	32479000	6.50586	2.83843	-2.563	45971.6
PRPF19	132150	172740	99092	12590000	12985000	10388000	134661	1.19877e+07	6.47608	3.90043	-2.913	6362.2
FOSL2	0	0	0	1473700	1600000	1131400	16000	1401700	6.45296	3.25252	-0.904	971
DDX41	0	0	0	1411400	1406800	1341200	16000	1.38647e+06	6.4372	6.36828	-1.199	3244.4
RPL7	122350	0	544100	21076000	25179000	11133000	222150	1.91293e+07	6.42811	1.97584	-2.201	2282.2
SLC25A10	0	0	0	1471500	1122100	1507400	16000	1367000	6.4168	3.42993	-0.275	251.6
IKZF1	0	0	0	1920800	1259600	867560	16000	1349320	6.39802	1.92889	-1.525	1794.8
LYL1	0	0	0	986080	1213400	1751000	16000	1.31683e+06	6.36285	2.35883	-0.787	373.2
NELFCD	0	0	0	1504500	1365600	1040300	16000	1.30347e+06	6.34814	3.15989	-1.156	111526
PPP1CA	0	0	0	1381100	1028100	1499100	16000	1.30277e+06	6.34736	3.11176	-1.301	4287.4
SLC25A1	0	0	159610	4828900	3860400	4287600	53203.3	4.32563e+06	6.34525	3.93654	-0.442	613.2
WDR5	0	0	0	1311700	1202900	1369100	16000	1.29457e+06	6.33825	4.92302	-1.972	1595.6
CSE1L	0	0	0	1173000	1243000	1413200	16000	1276400	6.31786	4.24188	-1.511	5792.6
MECP2	0	0	0	1164800	1177200	1409200	16000	1250400	6.28817	4.02061	0.458	498.6
PAK2	0	0	0	1034900	1517700	1163000	16000	1.23853e+06	6.27442	2.99359	-0.435	3168.4
PPIE	0	0	0	950200	1269600	1486500	16000	1.23543e+06	6.2708	2.86402	-1.014	1523.6
RPL13	260010	258900	916740	38907000	46970000	22392000	478550	3.60897e+07	6.23677	2.10101	-3.659	19057.6
DPM1	0	0	0	1143200	1169000	1302400	16000	1.20487e+06	6.23466	4.77792	0.189	1071
NOP58	0	0	0	1178700	1149100	1263400	16000	1.19707e+06	6.22529	5.39806	-2.718	7187.4
DOCK8	0	0	0	1257900	1166000	1081000	16000	1168300	6.1902	4.66459	-0.456	7351
ILF2	132570	0	0	3378400	3198400	2910800	44190	3.16253e+06	6.16122	4.58032	-2.235	9710
CCDC12	0	0	0	885010	1236100	1310900	16000	1.144e+06	6.15988	3.0199	-1.188	569.4
MAFG;MAFK	0	0	0	1165600	1134300	1121200	16000	1.14037e+06	6.15528	6.97191	-1.427	53.2
NOP56	0	0	0	1209900	1057700	1141200	16000	1.13627e+06	6.15009	4.87407	-1.683	10410.4
CWC15	0	0	0	1017400	1049200	1318000	16000	1128200	6.13981	3.53464	-1.474	1614.4
MYO1C	0	0	0	1194600	1015700	1172600	16000	1.12763e+06	6.13908	4.43488	-0.368	100
ERH	0	346790	0	9361500	6317900	8752500	115597	8.14397e+06	6.13856	2.99191	-1.156	2252.2
RBM7	0	0	0	921590	1255100	1186800	16000	1.12116e+06	6.13078	3.41443	0.032	337.8
GATAD2B	0	0	0	1141400	1299200	891490	16000	1.1107e+06	6.11725	3.1389	-0.072	985.2
ARPC5	0	0	0	1225600	1063100	895890	16000	1061530	6.05193	3.43428	-0.166	1406
THOC5	0	0	0	996570	1159800	1018800	16000	1058390	6.04766	4.49315	-1.293	1473
UBP1	0	0	0	1466500	952520	747780	16000	1055600	6.04385	2.10627	0.209	2468.2
ATP5C1	111400	0	0	2659400	2717500	1953200	37133.3	2.44337e+06	6.04001	3.19652	-1.354	5021.8
SRPK1	0	0	0	1034900	1050600	1063100	16000	1.04953e+06	6.03553	7.65965	-0.718	2648.4
BAG2	0	0	0	1020100	977560	1138500	16000	1.04539e+06	6.02982	4.57472	-0.214	236.2
SF3B4	0	0	0	920060	1114500	1015000	16000	1016520	5.98942	4.26215	-1.408	2192.4
FXR1	0	0	0	1128700	1235800	657450	16000	1.00732e+06	5.9763	2.32138	-0.139	3900.6
MYBBP1A	0	0	0	1001200	1031200	938670	16000	990357	5.9518	5.46537	-1.689	2759.2
TAF15	72647	143630	65161	5656100	9034100	2401800	93812.7	5.69733e+06	5.92436	1.36683	-0.972	9155.2
MRPS22	0	0	0	924030	1161900	820170	16000	968700	5.91991	3.17774	-2.141	1149.2
DHX8	0	0	0	933060	987820	975790	16000	965557	5.91522	6.27978	-1.73	2294.4
SSBP2	0	0	0	832600	1012800	1022700	16000	956033	5.90092	3.99227	0.265	1827.6
RPS11	93336	117440	308920	10623000	13739000	6626000	173232	1.03293e+07	5.8979	2.10412	-2.784	53739.6
CWC22	0	0	0	747880	1225800	841960	16000	938547	5.87428	2.51937	-1.347	1381.4
ATAD3A	284630	234320	100020	14221000	11572000	10066000	206323	11953000	5.85632	3.19256	-0.056	463.2
SNRPF	0	0	0	712670	1227900	839250	16000	926607	5.85581	2.40491	-3.323	1796
VEZF1	0	0	0	1077600	966120	719100	16000	920940	5.84696	3.01611	-0.656	1355.8
ARPC2	0	0	0	1071900	865590	817200	16000	918230	5.84271	3.52383	-1.628	8446.8
ATF7	0	0	0	1614000	625220	482460	16000	907227	5.82532	1.19854	-0.499	631.4
AHSA1	0	0	0	530080	827530	1357300	16000	904970	5.82173	1.69666	0.341	2848.6
MYO1F	0	0	0	1030900	829350	851280	16000	903843	5.81993	3.84008	-0.653	2695.8
PHB	0	0	0	861310	893150	927880	16000	894113	5.80431	5.89346	-1.586	3035.4
PABPN1	0	0	0	1086700	1037500	557970	16000	894057	5.80422	2.21602	-1.426	573.4
EIF4A1	98252	113040	113600	8370500	6364400	3384500	108297	6039800	5.80143	1.82642	-2.447	111526
ZC3H14	0	0	0	987670	935290	745940	16000	889633	5.79707	3.57489	-0.385	2034.6
LYAR	0	0	0	830730	931090	901510	16000	887777	5.79405	5.12296	-0.466	1639.8
HNRNPUL2	0	0	0	1107100	1057100	477040	16000	880413	5.78204	1.91657	-0.62	738.4
PHB2	0	0	0	1117800	820380	702950	16000	880377	5.78198	2.68936	-2.079	6785.6
RPL12	288400	431350	495790	17897000	27020000	21097000	405180	2.20047e+07	5.7631	2.89465	-1.732	16952.2
MYL12A;MYL12B;MYL9	0	306780	0	6310700	5543400	4792200	102260	5.54877e+06	5.76185	3.57249	-0.887	4268
SNRPB;SNRPN	114850	0	0	3939700	1119300	1165900	38283.3	2.07497e+06	5.76023	1.02459	-1.873	4822.4
CCT7	0	0	0	988440	899630	707550	16000	865207	5.7569	3.32239	-1.892	8985.4
EBNA1BP2	0	0	0	856130	754720	981170	16000	864007	5.7549	3.7197	-1.451	2335.2
YLPM1	0	0	0	665840	1303300	611810	16000	860317	5.74872	1.74658	-0.876	6573.4
FERMT3	0	0	0	1018900	778910	781300	16000	859703	5.7477	3.37999	-0.384	3359
SON	0	0	0	958500	882070	731000	16000	857190	5.74347	3.67138	-2.434	16499.8
RPS3A	178970	128090	335300	14019000	11295000	8889900	214120	11401300	5.73463	2.78151	-4.26	2420.8
LUC7L3	0	0	0	878420	1011200	658840	16000	849487	5.73045	2.9327	-2.256	8261.4
THOC7	0	0	0	983630	777260	781780	16000	847557	5.72717	3.62167	-1.927	1909.8
PNN	0	1370200	0	14823000	32916000	24412000	456733	2.40503e+07	5.71856	1.96481	-1.255	15408.2
H1FX	0	0	0	822720	751500	935380	16000	836533	5.70828	4.00919	0.216	1311.8
YWHAG	0	0	0	1000200	802400	701590	16000	834730	5.70517	3.16726	-0.565	1344
HNRNPR	0	128400	0	2803500	1590300	2270100	42800	2221300	5.69765	2.45279	-0.344	8492
HNRNPA1;HNRNPA1L2	0	0	0	1055900	623130	773820	16000	817617	5.67528	2.52575	-1.027	6074.6
RPS15A	0	0	0	960420	711490	780530	16000	817480	5.67504	3.4137	-2.485	31204
P4HA1	0	0	0	812900	810600	827240	16000	816913	5.67404	8.0047	0.2	898.2
QPCTL	0	0	0	674390	873830	886730	16000	811650	5.66471	3.5312	-0.481	416.6
PPIG	0	0	0	902160	917430	604140	16000	807910	5.65805	2.86201	-0.074	3299.6
SF3B6	0	0	0	665660	759660	993110	16000	806143	5.65489	2.93538	0	111526
DDX50	0	0	0	684710	831520	888270	16000	801500	5.64656	3.72255	0.169	2526.2
YTHDC1	0	0	0	1122100	904500	374730	16000	800443	5.64466	1.64545	-1.954	111526
THOC3	0	0	0	772980	872320	753620	16000	799640	5.64321	4.57768	-2.051	35.2
SF3B2	311400	201030	187530	8920300	16566000	8820500	233320	11435600	5.61508	1.9207	-2.073	8572.4
RPL32	0	287650	0	4669600	3537400	5766000	95883.3	4.65767e+06	5.60218	2.66216	-4.09	30333.2
CACYBP	0	0	0	681510	805710	840490	16000	775903	5.59973	4.05811	-0.17	1652
PRPF4B	0	0	0	971100	649280	700870	16000	773750	5.59572	2.82655	-0.927	4879.4
DDX21	112700	0	120200	4027200	3731200	3478600	77633.3	3.74567e+06	5.5924	4.6341	-2.624	7479.2
GFI1	0	0	0	804760	756730	742550	16000	768013	5.58499	5.66623	-3.248	297.6
CRNKL1	0	241520	0	3048700	4177100	4292500	80506.7	3.83943e+06	5.57564	3.12578	-0.797	1157
PPP2R1A	0	0	0	1055500	563750	663230	16000	760827	5.57142	2.14642	-1.931	3681.6
SAFB	0	0	0	574020	923450	744730	16000	747400	5.54574	2.75182	-0.834	3224.8
RPS7	0	0	0	734840	756750	736010	16000	742533	5.53631	7.29595	-3.241	9163.2
LONP1	0	0	0	764300	780270	664110	16000	736227	5.52401	4.45481	-2.216	1810.6
MRPS18B	0	0	0	578010	511930	1114100	16000	734680	5.52097	1.73868	-2.315	111526
RPL11	160840	112130	189500	5779200	7834900	7567800	154157	7.06063e+06	5.51733	3.36355	-3.747	47584.4
ARPC3	0	0	0	1111800	1083000	0	16000	731600	5.51491	0.93485	-0.677	6075.4
CCT6A	0	0	0	805370	718560	667150	16000	730360	5.51246	4.26207	-2.494	7952.8
RPS17	0	0	0	677390	904010	582300	16000	721233	5.49432	2.78461	-2.6	111526
JUND	0	0	0	954320	566130	635280	16000	718577	5.489	2.41372	-0.512	348
HNRNPK	99029	256100	187170	10277000	9099900	4840600	180766	8072500	5.48082	2.05588	-1.762	21880
RPL8	395710	221460	332720	22405000	10409000	9527400	316630	14113800	5.47816	1.53264	-3.402	29967.4
DAP3	0	0	0	696690	711240	729530	16000	712487	5.47672	6.72247	-2.306	3386.8
RBM15	0	0	0	582240	806290	736590	16000	708373	5.46837	3.36438	-0.511	1132.2
CCT8	0	284600	209140	8928600	5896700	6784500	164580	7.20327e+06	5.45179	2.83355	-1.41	10860.6
RPL18	515560	311010	0	10511000	11443000	14148000	275523	12034000	5.4488	3.36114	-3.553	17969
NUP93	0	0	0	925900	545770	624770	16000	698813	5.44876	2.41991	-2.446	3591.2
POLB	0	0	0	824870	598780	652450	16000	692033	5.4347	3.27479	0.008	648.8
POLDIP3	0	0	0	680920	684980	703030	16000	689643	5.42971	7.24783	0.204	1936.4
SF3A1	377510	102950	126750	8746800	10723000	6632400	202403	8.70073e+06	5.42583	2.69952	-3.059	5486
MRPS27	0	0	0	793230	689640	566280	16000	683050	5.41585	3.31835	-1.514	2047.8
MEIS1;MEIS2	0	0	0	625090	750610	669920	16000	681873	5.41336	4.30521	-2.281	524.2
WBP11	0	0	0	655700	848010	523840	16000	675850	5.40056	2.70068	-1.392	4163.2
PUF60	0	0	0	774910	650550	600560	16000	675340	5.39947	3.69834	-3.211	2734.8
XRCC6	0	0	0	767970	763380	479240	16000	670197	5.38844	2.66347	-1.425	12948
RPL15	461170	0	261090	10533000	9437600	10270000	240753	10080200	5.38782	4.99111	-4.064	9316.6
SLTM	0	0	0	586200	811700	601500	16000	666467	5.38039	3.10335	0.205	5962.2
RPL31	446010	0	450690	11961000	14987000	10203000	298900	1.23837e+07	5.37263	2.99817	-2.378	35338.6
PPHLN1	0	0	0	659600	729400	594390	16000	661130	5.36879	4.14956	0.346	2472.8
SRP72	0	0	0	1052700	496750	421980	16000	657143	5.36006	1.52507	-1.196	6377.2
DIAPH1	0	0	0	611940	715600	641420	16000	656320	5.35826	4.54036	-0.118	7722.2
LEMD2	0	0	0	759740	651470	538520	16000	649910	5.3441	3.27965	-0.551	508
SF3B5	0	0	0	980590	951790	0	16000	644127	5.3312	0.934776	-2.439	1348.8
ZNF830	0	0	0	634380	599820	695600	16000	643267	5.32927	4.672	-2.296	489
RPL28	118780	129490	189920	9251300	2823800	5498100	146063	5.85773e+06	5.32568	1.42572	-1.795	17222.4
RPL6	233380	407310	345390	10691000	13392000	14692000	328693	12925000	5.29728	3.36106	-2.952	9671.6
ATXN10	0	0	0	761350	521790	592660	16000	625267	5.28833	3.03632	-1.721	3842
SF3B1	87448	317750	121670	7654700	8837700	4000700	175623	6.83103e+06	5.28155	1.98755	-1.524	20877.8
PTDSS1	0	0	0	624930	565930	667900	16000	619587	5.27516	4.51416	0.11	3516.4
MRTO4	0	0	0	709570	699110	413480	16000	607387	5.24647	2.47907	-0.919	1227
ZEB2	0	0	0	931170	623930	249700	16000	601600	5.23266	1.42125	-1.145	5961
SUGP2	0	0	0	572750	742780	437870	16000	584467	5.19098	2.56996	-0.687	8243.4
NUDC	0	0	0	620870	569340	560520	16000	583577	5.18878	5.1908	-2.656	2662
BUD31	0	0	0	418810	660260	670480	16000	583183	5.18781	2.68023	-3.16	1042.8
ARHGAP4	0	0	0	541090	531960	673790	16000	582280	5.18557	3.65547	0.064	3617
SF3A3	136740	0	161710	3544800	4682900	2623800	99483.3	3.61717e+06	5.18426	2.38042	-1.885	4338.2
RBM39	210170	0	0	2949700	1941400	2748100	70056.7	2546400	5.18379	2.84453	-2.143	10055.8
SDE2	0	0	0	471660	806950	461640	16000	580083	5.18012	2.15967	-1.397	111526
EXOSC10	0	0	0	626270	704170	396260	16000	575567	5.16884	2.47018	-1.91	4647.4
CLASRP	0	0	0	446330	795970	471880	16000	571393	5.15834	2.14922	-1.476	1957.6
TCOF1	0	257870	0	4420900	2466900	2317200	85956.7	3.06833e+06	5.1577	1.92061	-1.304	3851.4
C1QBP	153920	178820	0	5462000	3706100	2683800	110913	3.95063e+06	5.15458	2.03814	-1.089	5369.4
RPS3	200480	236030	400210	11222000	9061700	9449300	278907	9911000	5.15118	3.87188	-2.986	69019.8
BRIX1	0	0	0	508150	723280	460160	16000	563863	5.1392	2.65205	-1.57	1736.6
TMEM33	0	0	0	651910	598680	417590	16000	556060	5.1191	2.84495	1.151	491.2
PTCD3	0	0	0	528100	650710	476910	16000	551907	5.10828	3.36477	-1.163	3406.4
RPL5	553010	1409200	290400	32774000	22551000	21126000	750870	2.54837e+07	5.08487	2.59139	-2.974	49788.2
CFAP20	0	0	0	520000	518290	573610	16000	537300	5.06958	5.10939	0	111526
TAF9;TAF9B	0	0	0	559280	525730	514360	16000	533123	5.05833	5.61175	0.522	2990.2
ZNF326	0	0	0	550010	602090	439450	16000	530517	5.05125	3.42074	0.049	1743.6
ARHGEF1	0	0	0	602090	506460	473820	16000	527457	5.04291	3.78456	-0.588	3263.2
RPL7A	0	491380	291540	6873600	8426900	10307000	260973	8.53583e+06	5.03156	2.92935	-2.256	37731.8
CUX1	0	0	0	680820	434360	423750	16000	512977	5.00275	2.43945	-0.476	2778.8
HDAC2	0	0	0	662990	511170	331920	16000	502027	4.97162	2.19993	0.265	5221.6
MBD2	0	0	0	770920	363930	367390	16000	500747	4.96794	1.68376	-0.776	1833.6
FAU	0	0	0	760280	739440	0	16000	499907	4.96551	0.934819	-1.321	8399
CDC5L	0	422210	482360	4069100	16349000	7818200	301523	9412100	4.96418	1.17789	-1.926	2389.2
MRPS2	0	0	0	518930	543750	433310	16000	498663	4.96192	3.92826	-1.051	784.6
FIP1L1	0	0	0	415910	587940	491320	16000	498390	4.96113	3.25204	-2.881	2215
RPS9	0	115670	688880	8728500	5710400	10088000	268183	8.17563e+06	4.93004	2.41925	-3.397	18425.6
PPIL3	0	85442	0	690140	1012000	900700	28480.7	867613	4.929	2.98099	0.544	907.8
RRS1	0	0	0	516060	474630	452840	16000	481177	4.91042	4.8828	-2.224	331.6
CTNNBL1	0	0	0	782530	293700	365580	16000	480603	4.9087	1.46364	-1.018	4368.4
SEC61A1	0	0	0	402330	521580	517400	16000	480437	4.9082	3.59984	-2.426	4368
MRPS34	0	0	0	478110	490760	468890	16000	479253	4.90464	6.73649	-3.146	747.4
SSR1	0	0	0	472970	396420	560420	16000	476603	4.89665	3.26027	-0.26	3373.2
SYNCRIP	0	0	0	418700	543120	461120	16000	474313	4.8897	3.69307	-0.921	5274.8
RBM27	0	0	0	432140	443050	545980	16000	473723	4.8879	3.70276	-0.229	1623.8
TOP2B	0	0	0	421030	482700	515940	16000	473223	4.88638	4.15556	-0.766	29240
PPIL2	0	0	0	355210	575270	484210	16000	471563	4.88131	2.74693	-2.808	1143.4
USP39	0	0	0	426380	531860	450060	16000	469433	4.87478	3.90339	-2.179	2352
ATF1	0	0	0	547750	512810	346060	16000	468873	4.87305	2.77944	0.029	589
RPL36	0	0	462640	4577100	5340200	3543400	154213	4486900	4.86272	2.87382	-3.866	7777.8
BUD13	0	0	0	395950	535760	464330	16000	465347	4.86216	3.4905	-1.369	1029.2
ESYT2	0	0	0	385920	479600	526280	16000	463933	4.85777	3.44776	-0.519	4662.6
RPL14	0	1009600	0	10439000	10537000	8269400	336533	9.74847e+06	4.85635	3.49751	-3.56	19834.4
CCT3	0	223670	0	2560600	1978400	1931100	74556.7	2156700	4.85434	3.1909	-2.92	9487.8
CWC27	0	0	0	522030	414330	450760	16000	462373	4.85291	3.89496	0.11	1095.4
RBM34	0	0	0	349660	536990	497260	16000	461303	4.84957	2.89761	-0.404	1763.4
TIMM50	0	0	0	634700	332900	393280	16000	453627	4.82536	2.10078	-0.91	1275.6
ACTN1	0	0	0	434200	551360	374410	16000	453323	4.8244	3.02165	-0.388	5314
RFC1	0	0	0	505510	370430	479040	16000	451660	4.81909	3.4	-1.844	3197.4
CXXC5	0	0	0	343340	423850	587550	16000	451580	4.81884	2.48509	-0.121	344
SKP1	0	0	0	527310	412590	414290	16000	451397	4.81825	3.54299	-0.756	3285.6
SFXN3	0	0	0	418680	510000	422790	16000	450490	4.81535	3.95352	-0.39	250.4
DNAJC13	0	0	0	630610	359190	341840	16000	443880	4.79403	2.04634	0.036	3915.2
CCT2	229710	0	0	2182700	2541200	1644700	76570	2.12287e+06	4.79309	2.77973	-3.011	10974.8
SQRDL	0	0	0	404480	545460	377880	16000	442607	4.78988	2.98095	-0.201	677.4
CALR	0	0	0	507030	462510	355190	16000	441577	4.78652	3.21609	-0.282	38617.8
MAGOHB	380640	0	395600	7835700	6629000	6913700	258747	7.12613e+06	4.78351	4.22953	-0.814	617.8
CDK6	0	0	0	449110	441710	419180	16000	436667	4.77039	5.96661	-2.611	2204.6
RUNX1	0	0	0	590530	0	715570	16000	435367	4.76609	0.921727	-2.007	1754.4
RPL22	0	198230	285770	4081500	4311600	4740200	161333	4.37777e+06	4.76208	4.43411	-1.144	8721
RBM25	377150	0	0	4967500	2444500	2786900	125717	3.39963e+06	4.75713	1.82534	-1.425	8258.4
SRSF8	0	0	0	470680	436560	375170	16000	427470	4.73968	3.97262	-0.602	595
HADHA	0	255310	0	3135000	1866000	1794600	85103.3	2265200	4.73428	2.09897	-0.441	10683.8
DHX16	0	0	0	474350	544530	254830	16000	424570	4.72986	2.08385	-1.758	111526
RPL23A	185180	0	537990	6307900	5433600	7286800	241057	6.34277e+06	4.71767	3.40085	-4.374	5761.2
TRRAP	0	0	0	526470	387670	345690	16000	419943	4.71405	2.81253	-1.584	6313.2
CACTIN	0	0	0	455620	450280	351550	16000	419150	4.71132	3.61249	-0.597	111526
DNTTIP1	0	0	0	549420	291460	411850	16000	417577	4.7059	2.30267	0.165	748.2
KPNB1	0	0	0	616790	359120	274500	16000	416803	4.70322	1.81007	-2.609	10728.2
DKC1	0	0	0	243420	394660	597860	16000	411980	4.68643	1.79674	-2.322	5338
CDK12	0	0	0	346340	435670	450140	16000	410717	4.682	3.64859	-1.223	3191.8
POLRMT	0	0	0	367560	406750	456820	16000	410377	4.6808	4.03741	-1.912	625
LRCH4	0	0	0	300260	458440	469570	16000	409423	4.67745	2.7693	-0.319	2074.6
TMCO1	0	0	0	387020	431700	408600	16000	409107	4.67633	5.22964	0.05	1220.6
NUP35	0	0	0	430680	414310	381530	16000	408840	4.67539	5.03225	-0.294	367.6
PAXBP1	0	0	0	385080	462960	376030	16000	408023	4.67251	3.91456	-1.192	111526
CCNK	0	0	0	409710	387630	419350	16000	405563	4.66378	5.76524	-1.185	1486.6
NHP2	0	0	0	518070	335100	348130	16000	400433	4.64542	2.61063	-1.678	1235.8
XRCC5	0	0	0	313040	426830	458050	16000	399307	4.64135	3.08517	-1.296	15166
MRPS23	0	0	0	286750	554250	352860	16000	397953	4.63646	2.10911	-2.266	1064.8
KIAA0020	0	0	0	408670	452340	320930	16000	393980	4.62198	3.28297	-0.041	2156.4
DYNC1H1	0	0	0	387500	339180	450730	16000	392470	4.61644	3.57976	-3.305	13791.2
GPKOW	0	0	0	363160	444500	354000	16000	387220	4.59701	3.75422	-1.412	441.2
THEM6	0	0	0	395270	358860	398600	16000	384243	4.58588	5.1444	0.171	111526
SAMHD1	0	0	0	425070	328390	386970	16000	380143	4.5704	3.76143	0.519	7367.6
HNRNPH1	391470	0	0	3955800	1988000	3325600	130490	3089800	4.5655	2.11826	-2.217	30864.6
DIMT1	0	0	0	478950	317000	339760	16000	378570	4.56442	2.76727	-1.914	1039
YME1L1	0	0	0	385850	405760	330250	16000	373953	4.54671	4.10757	-2.691	5066.6
DHX30	0	0	0	442330	281400	388990	16000	370907	4.53491	2.84416	-1.784	2369.4
DGCR14	0	0	0	421230	383660	303050	16000	369313	4.5287	3.34741	-0.932	317
TBK1	0	0	0	325120	431900	347880	16000	368300	4.52474	3.46282	0.451	1021
KDM2B	0	0	0	362650	382700	351640	16000	365663	4.51437	5.64133	-0.669	1763.8
AIFM1	0	0	0	409750	316700	369570	16000	365340	4.5131	3.76635	-1.534	928.8
EPRS	0	0	0	446950	305520	338960	16000	363810	4.50704	2.98343	-1.804	7925.8
SLU7	0	0	0	347370	445700	298220	16000	363763	4.50686	2.95699	-1.046	1979.4
PRMT1	0	0	0	341140	406460	342960	16000	363520	4.50589	4.14615	-3.092	3519.4
U2AF1	0	0	0	405190	481480	194570	16000	360413	4.49351	1.86369	-1.789	3973.8
DHX15	86808	94321	0	1176300	1433500	1466300	60376.3	1358700	4.4921	3.7521	-1.9	8714.8
TFIP11	0	0	0	456660	365140	252920	16000	358240	4.48478	2.43213	-1.463	1699.4
ZNF384	0	0	0	335520	281260	454900	16000	357227	4.4807	2.65103	0.262	1952.4
UBE2M	0	0	0	346390	442380	274480	16000	354417	4.4693	2.72477	-1.7	834.2
SRP68	0	0	0	453140	229890	379580	16000	354203	4.46843	2.24256	-0.921	2536.4
FLOT1	0	0	0	444090	341360	273040	16000	352830	4.46283	2.68173	-0.821	111526
FYTTD1	0	0	0	372650	375730	309540	16000	352640	4.46205	4.08666	0.203	1341.4
NUP205	0	0	0	343330	320760	392280	16000	352123	4.45994	4.12109	-1.453	7391.2
SF3B3	416630	250370	149980	5355600	6766600	5719300	272327	5.94717e+06	4.44879	3.72006	-2.932	9627.2
RPL35A	0	208310	377580	3831200	6041500	2857000	195297	4.24323e+06	4.44142	1.8871	-2.811	25020.4
JUNB	0	0	0	376650	287780	361810	16000	342080	4.41819	3.62038	-0.566	349.8
IMPDH2	0	0	0	336550	401200	284090	16000	340613	4.41199	3.25985	-2.707	13449
GTPBP4	0	0	0	420180	346020	255150	16000	340450	4.4113	2.69006	-1.509	2785
PHRF1	0	0	0	309550	435060	276540	16000	340383	4.41102	2.6705	-0.507	985.2
SART1	0	0	0	388010	377810	254320	16000	340047	4.40959	2.86043	-1.912	2383.8
CEBPA	0	0	0	358570	333350	316380	16000	336100	4.39275	4.97809	-3.583	31.4
PRPF4	0	0	0	475780	518710	0	16000	331497	4.37285	0.932345	-1.676	1472.2
MBD3	0	0	0	335280	295800	361710	16000	330930	4.37038	4.18171	-0.613	252.2
LCP1	87339	1608400	0	14908000	11071000	9083700	565246	1.16876e+07	4.36995	2.4691	-0.737	21926.8
C7orf50	0	0	0	296040	342540	352090	16000	330223	4.3673	4.35155	-0.796	83
CXorf56	0	0	0	315290	346390	319450	16000	327043	4.35334	5.32725	-0.299	343.6
TAF12	0	0	0	651410	328450	0	16000	326620	4.35147	0.802973	-1.12	518.8
PRPF31	0	0	0	241720	325510	410180	16000	325803	4.34786	2.58794	-2.945	1291
PRPF40A	0	99325	97215	1062200	1500900	1390400	65513.3	1.31783e+06	4.33024	3.11503	-1.085	5834
CEBPD	0	0	0	491370	214120	255160	16000	320217	4.3229	1.68367	-0.324	18
PIK3AP1	0	0	0	384830	309280	262280	16000	318797	4.31649	3.06089	-0.148	4215.2
MRPS25	0	0	0	303420	358930	293410	16000	318587	4.31554	4.0099	-2.809	1091
MRPS15	0	0	0	276130	298900	374850	16000	316627	4.30664	3.34988	-1.275	1727.2
RNF113A	0	0	0	345180	309240	283340	16000	312587	4.28811	4.19688	-2.064	484.6
ARHGAP17	0	0	0	350380	308970	277830	16000	312393	4.28722	3.92367	-0.584	2353.2
MRPS28	0	0	0	363080	388950	184240	16000	312090	4.28582	2.0786	-1.096	572.2
EFTUD2	603720	636670	418610	15720000	7322300	9265500	553000	1.07693e+07	4.2835	1.8009	-2.927	6033.4
ARHGAP1	0	431640	0	2700700	3310400	2356900	143880	2.78933e+06	4.27698	2.96527	-0.463	1468
PRPF38A	0	0	0	253210	375880	297970	16000	309020	4.27156	3.00229	-2.318	1586
PTBP1	0	0	0	253900	343150	320300	16000	305783	4.25637	3.47496	-2.3	6578.6
HCLS1	0	0	0	307250	210810	390330	16000	302797	4.24221	2.36729	-1.127	5314.6
NOP10	0	0	0	595430	0	304730	16000	300053	4.22908	0.807336	-1.554	1161.8
C9orf78	0	0	0	292510	349310	248250	16000	296690	4.21281	3.27429	-1.176	1981.6
RPS2	0	559920	0	3487700	4014300	2823600	186640	3.44187e+06	4.20486	2.94074	-2.773	15595.6
HMHA1	0	0	0	317670	362720	194180	16000	291523	4.18747	2.35341	-2.507	1774.4
MTA1	0	0	0	337040	311990	220100	16000	289710	4.17847	2.90881	-0.534	1797.4
HACD3	0	0	0	252930	281230	334580	16000	289580	4.17782	3.57216	0	111526
CAND1	0	0	0	266210	373760	223020	16000	287663	4.16824	2.5188	-0.829	4767.4
SNRPD2	356180	532030	0	6472700	4206900	5237400	296070	5.30567e+06	4.16352	2.75854	-1.855	4910
CTBP2	0	0	0	340560	338310	180290	16000	286387	4.16182	2.2442	-0.094	1037.6
SPI1	0	0	0	282690	204560	368190	16000	285147	4.15556	2.42004	-2.194	1406
RPS4X	467700	934270	357730	5712800	12222000	13353000	586567	1.04293e+07	4.1522	1.83633	-2.695	80854.6
APOBEC3B	0	0	0	286630	242880	322160	16000	283890	4.14919	3.6117	-0.019	314.4
DNM1L	0	0	0	338840	269530	240150	16000	282840	4.14384	3.19349	-1.089	3653
IK	0	0	0	253410	335560	256040	16000	281670	4.13786	3.32427	-0.858	3758.2
NUP88	0	0	0	344080	242690	243990	16000	276920	4.11333	2.92826	-1.566	2223.2
VARS	0	0	0	285880	272130	266660	16000	274890	4.10271	5.95095	-2.678	111526
SSR4	0	0	0	266070	235220	321130	16000	274140	4.09877	3.39717	0.131	2213.2
RPS20	248850	236530	0	2552900	3010500	2729000	161793	2.76413e+06	4.0946	4.12187	-1.487	30466
YKT6	0	0	0	179790	177340	461030	16000	272720	4.09128	1.35382	-0.94	865.6
RPS21	0	0	0	189610	215170	411510	16000	272097	4.08798	1.74923	-1.322	13675
MRPS26	0	0	0	263710	359800	192340	16000	271950	4.0872	2.30319	-2.512	333.8
EIF3L	0	0	0	279420	241480	291870	16000	270923	4.08174	4.24013	-1.558	22814.4
MRPS35	0	0	0	367770	0	444720	16000	270830	4.08124	0.922007	-2.017	1063.6
RBM12B	0	0	0	216210	289720	305850	16000	270593	4.07998	3.21778	-0.39	1096.6
RBM17	0	0	0	306420	319730	183140	16000	269763	4.07555	2.46426	-2.011	3711.6
RPS13	332690	124270	293980	4052400	4468600	4138600	250313	4.21987e+06	4.07539	5.01055	-2.95	21458.8
RPN2	0	0	0	253710	227070	328370	16000	269717	4.0753	3.05439	-1.312	11159.8
MRPS9	0	0	0	410810	205790	191360	16000	269320	4.07318	1.71901	-0.938	1260.4
YWHAQ	0	0	0	353500	198560	255320	16000	269127	4.07214	2.39668	0.042	4924.6
CHD1	0	0	0	263450	264510	275430	16000	267797	4.06499	6.60136	-1.219	4574.2
ARF4	0	0	0	272350	345630	184630	16000	267537	4.06359	2.34301	-0.844	1565.6
TUBB;TUBB2B	538090	1742600	1123700	23800000	18401000	14547000	1.1348e+06	18916000	4.0591	2.55667	-2.264	210.4
NDUFA13	0	0	0	269500	303440	224480	16000	265807	4.05423	3.5043	-2.767	1992.4
RPLP1	0	0	0	609860	183030	0	16000	264297	4.04601	0.662838	-1.827	19479.2
RPL24	0	0	684510	3297900	4369200	3568600	228170	3.74523e+06	4.03687	3.05865	-2.863	16499.2
RPF2	0	0	0	326270	235710	224930	16000	262303	4.03509	2.91144	-0.603	934.6
CAPZA1	0	765810	0	4267000	4109700	4160800	255270	4.17917e+06	4.03312	3.95312	-0.405	3315.2
MRPS17	0	0	0	258210	248310	270920	16000	259147	4.01763	5.61457	0.018	428.4
RRP8	0	0	0	303800	283410	186360	16000	257857	4.01043	2.6862	-0.151	415.6
RANGAP1	0	0	0	281900	233550	254890	16000	256780	4.00439	4.28544	-2.536	2677
RPL29	0	0	910450	4060100	5922700	4586700	303483	4856500	4.00023	2.70604	-0.904	6082.6
TRAP1	0	0	0	208810	283080	270960	16000	254283	3.99029	3.41922	-0.128	3271.2
ACSL1	0	0	0	210780	284200	259610	16000	251530	3.97459	3.50932	0.015	1341
DDX6	0	0	0	269010	266420	215430	16000	250287	3.96744	3.86291	-0.954	2478
SRP14	0	0	0	266040	288080	195620	16000	249913	3.96528	3.0669	-1.668	4444.2
HNRNPM	2677200	1359300	2027800	35429000	34203000	25008000	2.02143e+06	3.15467e+07	3.96404	3.05866	-0.437	10813.6
PHGDH	0	2209200	0	12420000	11716000	10291000	736400	1.14757e+07	3.96194	3.42774	-0.287	2305.8
ZC3H13	0	0	1528400	5218500	9313700	9080100	509467	7.87077e+06	3.94944	2.17881	-0.895	3579.6
NDUFA4	0	0	0	281490	213920	246060	16000	247157	3.94928	3.65023	-0.551	3187.8
MRPS10	0	0	0	277170	178170	281350	16000	245563	3.93995	2.72375	-1.442	541.6
DNAJA3	0	0	0	242300	335820	154600	16000	244240	3.93216	2.02078	-2.653	984
CBFA2T3	0	0	0	299100	431310	0	16000	243470	3.9276	0.88947	-0.257	444.8
AP2A1	0	0	0	193180	321260	215020	16000	243153	3.92572	2.44939	-0.211	1627.4
PPIH	0	0	0	251280	262450	210940	16000	241557	3.91622	3.98855	-0.196	1577
PPWD1	0	0	0	223510	299020	201190	16000	241240	3.91433	2.90887	-1.711	2013
FNBP4	0	0	0	250490	255290	217360	16000	241047	3.91317	4.4516	-1.438	4682.8
RPL27A	343180	0	357290	2770400	3745600	4034100	233490	3516700	3.91279	2.92152	-3.036	21086.8
ATP5O	0	0	0	0	218200	503410	16000	240537	3.91011	0.758902	-1.72	4752.8
GMFG	0	0	0	282140	219350	218920	16000	240137	3.90771	3.47647	-0.654	4949.6
DDX23	0	0	0	169960	218570	329750	16000	239427	3.90344	2.14469	-2.801	4409.6
NCOA5	0	0	0	231120	220350	260860	16000	237443	3.89144	4.39842	-0.573	1252
CCNL2	0	0	0	268160	261800	182180	16000	237380	3.89105	2.99448	-0.53	2133
CORO1A	0	0	0	222250	259920	229120	16000	237097	3.88933	4.47319	-0.869	4974.8
H2AFY	0	0	0	342210	238390	127440	16000	236013	3.88272	1.72114	-0.459	16136.4
RPS15	0	0	0	0	342980	360170	16000	234383	3.87273	0.934218	-2.589	3359.2
ACTR3	0	524340	0	3312500	1871700	2353700	174780	2.51263e+06	3.84559	2.157	-1.731	5066.2
CEBPB	0	0	0	335720	346190	0	16000	227303	3.82848	0.934755	-0.743	17.2
STK26;STK25	0	0	0	279530	172850	228960	16000	227113	3.82727	2.74356	0.106	2277
SUPT7L	0	0	0	164880	284150	232050	16000	227027	3.82672	2.55793	-0.123	1724.8
SLC25A3	272580	0	435900	3458300	4176900	2389300	236160	3341500	3.82266	2.35925	-1.34	14093.4
KIAA1429	4823800	0	0	20668000	22638000	24245000	1.60793e+06	22517000	3.80774	3.40116	-1.43	2788
MRPS6	0	0	0	233400	270970	163350	16000	222573	3.79814	2.67255	-2.614	638.4
AZU1	0	0	0	211850	230150	220940	16000	220980	3.78777	5.70946	-0.395	4307
SDAD1	0	0	0	212400	278410	166470	16000	219093	3.7754	2.59864	-1.775	1821.6
ZNF362	0	0	0	209430	213320	233130	16000	218627	3.77233	5.12158	0.201	415.6
ILF3	0	0	0	283790	137490	230310	16000	217197	3.76286	2.1505	-2.229	14199.8
FLOT2	0	0	0	214930	206310	227180	16000	216140	3.75582	5.43462	-0.368	2202.4
HNRNPU	581980	248680	588890	5994400	6644500	6424600	473183	6354500	3.74731	4.92253	-2.452	25311.2
BLM	0	0	0	200260	194550	242440	16000	212417	3.73075	3.82897	-0.391	2366.2
RPL23	271390	425650	704130	8502200	6282200	3760200	467057	6.18153e+06	3.7263	1.84727	-3.394	35339.4
SAFB2	0	0	0	281490	351310	0	16000	210933	3.72064	0.917444	-0.225	1840.4
STXBP2	0	0	0	220070	258390	152940	16000	210467	3.71745	2.61907	-0.574	2200
RPL19	0	513690	1175500	6171800	8060900	7930300	563063	7.38767e+06	3.71375	3.21319	-1.847	36266.2
ACTR2	0	528850	0	2058000	1974000	2896500	176283	2309500	3.71161	2.46712	-0.958	7240
PYCR2	0	0	0	243790	207330	176410	16000	209177	3.70858	3.37087	0.076	1803
RPS24	0	0	0	222200	260080	144790	16000	209023	3.70752	2.45311	-0.11	46537.8
ARL6IP4	0	0	0	169630	250790	202160	16000	207527	3.69715	3.03631	-0.499	2309.4
RSL1D1	0	435790	0	1629600	2112500	1905600	145263	1.88257e+06	3.69596	3.00091	-1.068	7606.6
PEO1	0	0	0	250270	185310	185210	16000	206930	3.693	3.17281	0	111526
KPNA1;KPNA5	0	0	0	214970	232240	169250	16000	205487	3.6829	3.40095	0.342	1566
ARHGEF2	0	0	0	251750	168790	187640	16000	202727	3.66339	2.89337	-0.324	3575.6
DLAT	0	0	0	361820	158380	87823	16000	202674	3.66302	1.16031	-0.15	1294.4
MAP2K2	0	0	0	0	208190	396030	16000	201407	3.65397	0.815172	-0.386	2007.2
RBM4B	0	0	0	175800	233070	194560	16000	201143	3.65208	3.54882	-0.785	440
DDX24	0	0	0	322110	281290	0	16000	201133	3.65201	0.928362	-1.112	5426.4
PRPF3	0	0	0	213730	204220	179970	16000	199307	3.63885	4.41851	-2.199	2872.4
RPS10	0	282920	0	1867200	968150	685530	94306.7	1.17363e+06	3.63747	1.36788	-2.081	217.8
RPS4Y1	0	0	0	168260	240450	186190	16000	198300	3.63154	3.0991	-0.972	5624.8
HSP90AA1	1143000	2730900	968350	20839000	20367000	18574000	1.61408e+06	1.99267e+07	3.62591	4.484	-0.44	37375
RBBP6	0	0	0	172450	219550	194930	16000	195643	3.61208	3.86726	-0.84	4881.2
EMD	0	260410	0	1168600	985980	996450	86803.3	1.05034e+06	3.59697	3.10505	0.427	892.2
RPS28	0	0	327950	1397400	1224300	1315600	109317	1.31243e+06	3.58566	3.25173	-2.938	713.6
FRG1	0	0	0	175480	215300	184490	16000	191757	3.58313	4.03946	-0.609	1308.2
USO1	0	0	0	172980	187720	213910	16000	191537	3.58148	4.04991	-2.534	3100.2
AP2B1;AP1B1	0	0	0	222320	159770	191620	16000	191237	3.57922	3.34687	-0.279	5182.6
UMPS	0	0	0	204690	170810	196450	16000	190650	3.57478	4.31643	-2.28	1137.2
SNX2	0	0	0	203970	183300	183780	16000	190350	3.57251	5.01081	0.184	3491.2
HNRNPDL	0	0	0	168930	123840	276220	16000	189663	3.5673	1.86226	-1.194	111526
RPS14	479650	363190	580510	4847800	6238200	5735800	474450	5.60727e+06	3.56297	3.62497	-3.164	29553.8
KAT2A	0	0	0	274500	287750	0	16000	187417	3.55011	0.934281	-1.914	3741.4
PPP1CC	0	0	0	175520	208940	177220	16000	187227	3.54864	4.17645	0.134	3761.4
OXSR1	0	0	0	175410	212090	172350	16000	186617	3.54393	3.89469	0.096	1380.8
RPS5	225240	776800	0	5107500	3344000	3036200	334013	3.82923e+06	3.51908	2.15608	-2.404	22575.4
RPS8	197090	366110	500420	3863800	4532300	3788900	354540	4.06167e+06	3.51805	3.90514	-4.019	51198.4
LYPLA1	0	0	0	194090	0	354730	16000	182940	3.51523	0.826773	-0.349	818.4
DDX1	0	0	0	183980	170500	190700	16000	181727	3.50563	5.16773	-1.844	5124
DDX55	0	0	0	174380	180390	187760	16000	180843	3.4986	5.90193	-1.436	1694.4
ZCCHC3	0	0	0	192730	161400	184390	16000	179507	3.48789	4.35943	-0.806	279.8
APOBEC3C	0	0	0	186160	179990	172310	16000	179487	3.48773	5.82855	-0.086	1100.6
PCBP1	191650	461200	397800	4066000	3882800	3560000	350217	3.83627e+06	3.45338	4.4883	-2.427	8167.8
DDX19B;DDX19A	0	0	0	187330	181710	152340	16000	173793	3.44123	4.05168	-0.947	449.6
TAF10	0	0	0	258240	0	259730	16000	172657	3.43176	0.935094	-0.626	1075.4
PPP1R9B	0	0	0	187210	178240	152110	16000	172520	3.43062	4.09046	-1.428	1544.8
XPO1	0	0	0	196770	175640	144730	16000	172380	3.42945	3.47257	-2.956	14564.2
HNRNPC	998930	1677500	2139500	16203000	16040000	19603000	1605310	17282000	3.42835	3.69194	-1.6	9548.8
LRPPRC	0	0	0	183750	179680	152550	16000	171993	3.42621	4.20967	-1.773	11837.4
CCNL1	0	0	0	157940	219600	123050	16000	166863	3.38252	2.38729	0.013	7643.2
HNRNPH2	0	0	0	189690	189440	119460	16000	166197	3.37675	2.685	-0.757	111526
RTCB	0	214150	0	901610	713440	608750	71383.3	741267	3.37633	2.41272	-1.381	111526
MRPL38	0	0	0	196490	181890	119170	16000	165850	3.37374	2.65744	-1.776	894.4
AIP	0	0	0	130700	198410	158670	16000	162593	3.34512	2.93443	-0.863	855
NOP16	0	0	0	143580	148140	187830	16000	159850	3.32057	3.46782	-2.118	835.2
CEBPG	0	0	0	203150	0	268030	16000	157060	3.29517	0.90797	-0.475	594.6
TUBA1B	1295500	4179100	2402000	30393000	25606000	20315000	2.62553e+06	25438000	3.2763	2.7786	-1.065	24279
NUP62	0	0	0	230760	0	226950	16000	152570	3.25333	0.935003	-3.205	1760.4
PFKL	0	0	0	176900	139240	137610	16000	151250	3.24079	3.52779	-0.578	4147
HADHB	328610	303230	0	1796100	2323600	1809300	210613	1.97633e+06	3.23016	3.01492	0.112	4073.6
MRPS7	0	0	0	142490	116090	190950	16000	149843	3.22731	2.62053	-1.091	1004.6
MRPS11	0	0	0	243420	205330	0	16000	149583	3.22481	0.924547	-2.23	553.6
CCT4	0	516710	0	1662500	1693800	1443600	172237	1.59997e+06	3.21558	2.78051	-3.386	7477.8
FBL	0	480860	0	2351500	1311800	759470	160287	1.47426e+06	3.20126	1.25005	-1.963	9542
LSM2	0	0	0	160090	96248	181990	16000	146109	3.1909	2.32428	-3.054	111526
SLC25A5	3557500	3036700	2757700	29888000	26902000	28373000	3117300	2.83877e+07	3.1869	5.0319	0.108	93.2
RRP1	0	0	0	155310	150120	130430	16000	145287	3.18276	4.36039	-1.721	1015
SRPK2	0	0	0	215120	220220	0	16000	145113	3.18104	0.934902	-0.384	1024.6
HNRNPA0	0	0	0	196410	109430	125220	16000	143687	3.16678	2.23628	-0.491	2352
ILF3	209200	480050	402240	3702300	2364000	3702000	363830	3256100	3.16181	2.50938	0	111526
AQR	1513700	0	0	3653700	5798000	4081400	504567	4.51103e+06	3.16034	2.07719	-2.23	3115.6
MYL6	158380	2974500	147960	9771000	10286000	9225700	1.09361e+06	9760900	3.15791	3.02936	-0.097	8737
NAT10	0	0	0	84685	174030	164070	16000	140928	3.13882	2.121	-1.902	5181.2
LMNB2	0	0	0	204140	218150	0	16000	140763	3.13713	0.933472	-1.174	1074.6
DDOST	0	0	0	214840	0	203430	16000	139423	3.12333	0.934001	-2.947	7333.2
RNH1	0	1764000	0	5069000	5465400	4711100	588000	5.08183e+06	3.11146	2.69746	-0.987	1230.8
HSD17B11	0	0	0	182000	113990	118620	16000	138203	3.11065	2.4887	0.382	2761
DHX9	202500	112990	155040	1323500	1572900	1167500	156843	1.35463e+06	3.11051	3.23519	-1.589	15577.8
RPL39P5;RPL39	0	0	0	0	196480	209320	16000	135267	3.07966	0.93362	0	142.4
ELAVL1	0	0	0	187650	216520	0	16000	134723	3.07386	0.927596	-0.272	1908.6
RPS19	416230	348830	617270	3442600	4019800	4158600	460777	3.87367e+06	3.07156	3.89401	-3.359	25389.4
BRI3BP	0	0	0	193050	209720	0	16000	134257	3.06885	0.932567	-0.069	235.2
IDH2	0	0	0	205290	78758	116860	16000	133636	3.06216	1.62959	0.079	6544.8
VASP	0	0	0	172110	223150	0	16000	131753	3.0417	0.911132	-0.424	1183.6
C17orf85	0	0	0	170110	224690	0	16000	131600	3.04002	0.907761	-1.623	1102
SDCBP	0	0	0	202270	0	188480	16000	130250	3.02514	0.933258	-0.168	1732.4
THAP11	0	0	0	107420	156110	123570	16000	129033	3.0116	3.07589	-0.474	294.4
TCP1	0	438860	0	1438500	978310	1108100	146287	1174970	3.00575	2.16588	-1.418	8936.8
PSME3	0	0	0	179930	0	204260	16000	128063	3.00071	0.929189	-0.528	1704.4
SNRPB2	297900	522310	0	1776400	2373500	2402600	273403	2.18417e+06	2.99798	2.77676	0.046	2004.8
ZBTB7B	0	0	0	0	164130	214960	16000	126363	2.98143	0.909325	-0.775	208.4
FEN1	0	0	0	172740	97090	106020	16000	125283	2.96905	2.20056	-2.315	2349.8
SSR3	0	0	0	121460	118500	135650	16000	125203	2.96813	4.72274	0.189	1858.8
PKN1	0	0	0	123950	137090	112240	16000	124427	2.95915	4.18717	-0.414	3970.2
NUP85	0	0	0	153950	219290	0	16000	124413	2.959	0.892243	-2.289	2516
SF3A2	194220	0	216300	978160	1080800	1110500	136840	1.05649e+06	2.94871	3.495	-2.322	1235.4
MAP2K1	0	0	0	0	237340	132190	16000	123177	2.94459	0.831881	-0.077	1013.8
COPB1	0	0	0	136250	106490	118800	16000	120513	2.91305	3.81594	-2.006	5447.4
MYADM	174180	0	0	489000	412760	394320	58060	432027	2.8955	2.34696	-0.958	2279.8
CCAR2	0	0	0	99171	148060	108940	16000	118724	2.89146	2.86746	-0.638	111526
RPS23	0	726480	435490	2363800	3208000	2946500	387323	2.83943e+06	2.87399	2.77249	-3.492	35030.4
CAD	0	0	0	150540	101710	98587	16000	116946	2.86969	2.64799	-2.48	7092.6
ACTA1;ACTC1;ACTG2;ACTA2	0	662650	0	1585400	1408700	1795100	220883	1596400	2.85347	2.28971	-0.199	3
ARPC5L	0	0	0	125450	0	221090	16000	115513	2.85192	0.83718	-0.497	515.4
ALYREF	466870	0	0	1213000	987570	1106000	155623	1102190	2.82424	2.30485	-1.144	111526
TBL2	0	0	0	160160	178790	0	16000	112983	2.81997	0.93064	-0.617	323.4
TOMM22	0	0	0	0	178280	157690	16000	111990	2.80723	0.929562	-2.12	1259.2
NHP2L1	0	0	568670	1335200	1412300	1226300	189557	1324600	2.80486	2.34589	-2.273	2140.6
RBM28	0	0	0	112430	132180	88312	16000	110974	2.79408	3.02655	-1.729	1624.6
XRN2	0	0	0	118500	213270	0	16000	110590	2.78908	0.831196	-1.234	5597.6
RPS16	2636600	981290	598710	9155200	10793000	9101500	1.40553e+06	9.68323e+06	2.78437	3.23325	-2.544	19478.6
KEAP1	0	0	0	131970	196450	0	16000	109473	2.77444	0.882008	-1.925	1385
NKRF	0	0	0	163420	0	163830	16000	109083	2.76929	0.935104	-0.271	643
RPS18	369490	495390	906600	3425900	4813000	3675800	590493	3.97157e+06	2.74972	2.75087	-3.352	111526
HSPD1	1064100	1437900	579960	7320100	7772700	5601100	1027320	6.89797e+06	2.74729	2.94084	-0.897	13928.8
PARP1	0	0	0	124660	110270	86041	16000	106990	2.74134	3.16325	-0.315	13702
TRIM27	0	0	0	184100	82983	53272	16000	106785	2.73857	1.26539	0.053	111526
VIM	4222900	2173100	4064900	26611000	25600000	16730000	3.48697e+06	2.29803e+07	2.72036	2.43152	-0.037	30552
MAGT1	0	0	0	143720	167950	0	16000	103890	2.69891	0.926227	-0.256	1200.4
SLC25A13	0	0	0	124350	96448	89134	16000	103311	2.69085	3.18672	0.138	1015.4
HSP90AB1	1113200	817510	1463700	8553600	6716200	6516300	1131470	7.26203e+06	2.68218	3.08964	-1.173	55807.8
YARS	0	0	0	92357	98991	116050	16000	102466	2.679	3.88334	-2.33	4713.4
SLC25A6;SLC25A4	282520	200650	294800	1845400	1382300	1678800	259323	1635500	2.65691	3.23814	-0.343	11262.2
HAT1	0	0	0	139520	0	161940	16000	100487	2.65086	0.926972	-0.699	2567.8
RPSA	190410	183040	366670	1141300	1634000	1855300	246707	1.54353e+06	2.64537	2.38715	-2.756	10128.4
RPL7L1	0	0	0	106540	98630	92184	16000	99118	2.63108	4.73874	-1.506	900
SLC25A22	0	0	0	120090	177160	0	16000	99083.3	2.63057	0.884166	-0.455	134.6
ARCN1	0	0	0	123340	86689	82243	16000	97424	2.60621	2.76791	-1.59	1972.2
RPS25	302220	0	404980	1212400	1179100	1834900	235733	1408800	2.57924	2.05637	-3.262	23893.8
ZBTB7A	0	0	0	164280	118640	0	16000	94306.7	2.55929	0.898379	-1.692	61.6
TAF4	0	0	0	97975	101730	79786	16000	93163.7	2.5417	3.79008	-0.557	633
LIN37	0	0	0	0	98849	178710	16000	92519.7	2.53169	0.829898	-0.738	139.2
DCTN2	0	0	0	88282	76390	111970	16000	92214	2.52691	3.03967	-1.354	2325.2
CREBBP	0	0	0	0	170200	104970	16000	91723.3	2.51922	0.860215	-0.181	3757.6
MRPS33	0	0	0	70361	101470	100860	16000	90897	2.50616	3.04593	-1.328	730
RPL35	423480	1234300	591060	2636100	4632700	5489300	749613	4252700	2.50416	1.78432	-2.408	9689
ITGAL	0	0	0	74021	108190	88157	16000	90122.7	2.49382	3.09068	0.148	2867.6
NUP54	0	0	0	119810	84428	62909	16000	89049	2.47653	2.23556	-1.095	1799.6
DLST	0	147460	0	248860	314070	246980	49153.3	269970	2.45744	1.82771	-1.334	2284.2
PTPN6	0	548970	0	1028700	971980	989060	182990	996580	2.44522	1.94141	-0.355	4309.8
HMGA1	790690	0	861980	3079600	2903000	3015400	550890	2.99933e+06	2.44481	3.01983	-0.791	2687.2
CPSF4	0	0	0	116950	142250	0	16000	86400	2.43296	0.921209	-1.822	631.2
HP1BP3	330850	251090	0	1144800	1114000	860620	193980	1.03981e+06	2.42234	2.48805	-0.536	7732.6
PSMD3	0	0	0	156370	99130	0	16000	85166.7	2.41222	0.86747	-1.951	3583
TRMT10C	0	0	0	0	141250	111290	16000	84180	2.39541	0.914765	-1.718	111526
MRPS31	0	0	0	137350	114690	0	16000	84013.3	2.39255	0.92328	-0.82	952.2
MT-CO2	0	0	0	130360	0	117280	16000	82546.7	2.36714	0.93098	0	111526
PDCD6IP	0	643600	0	1026200	1075200	1218100	214533	1106500	2.36673	1.79801	-1.041	111526
MBOAT7	0	0	0	0	124630	121560	16000	82063.3	2.35867	0.934875	-0.339	564.2
FUS	0	0	0	118150	122710	0	16000	80286.7	2.32709	0.934573	-0.948	17678.6
NUP155	0	0	0	126590	0	112360	16000	79650	2.3156	0.929869	-1.559	2429.4
PYCARD	0	0	0	89128	72351	75143	16000	78874	2.30148	3.96136	0.033	648.8
ARGLU1	0	0	261100	415400	335500	526730	87033.3	425877	2.2908	1.5171	-1.47	4884.2
PRPF38B	0	0	0	107870	126220	0	16000	78030	2.28596	0.92608	-3.489	3391.2
ATP5J2	0	0	0	123580	68795	39079	16000	77151.3	2.26962	1.44836	-0.706	2210.8
CCT5	0	206050	443640	1055000	1292700	778100	216563	1.04193e+06	2.2664	1.86492	-2.206	9623.6
MARS	0	0	0	90347	78292	61034	16000	76557.7	2.25847	3.07377	-2.749	5364.6
CYC1	0	179480	0	209430	270640	371150	59826.7	283740	2.24571	1.37263	-2.419	2300.4
UTP23	0	0	0	0	103450	123580	16000	75676.7	2.24178	0.923599	-2.542	329.2
TBC1D15	0	0	0	98265	125120	0	16000	74461.7	2.21843	0.914234	0.122	1931.4
NKAP;NKAPL	0	0	0	109020	0	113980	16000	74333.3	2.21594	0.934371	-1.879	509.2
SEC13	0	0	0	90903	0	130400	16000	73767.7	2.20492	0.89066	-1.926	2011
LMNB1	2076900	953810	1680800	8878500	7297400	5354300	1.5705e+06	7.17673e+06	2.1921	2.19645	-0.048	6397.4
ATP2A2;ATP2A1;ATP2A3	0	0	0	0	112540	105490	16000	72676.7	2.18342	0.933554	-3.129	6999.8
CPT1A	0	0	0	0	118180	99130	16000	72436.7	2.17865	0.923854	-0.275	6095.4
EIF6	0	458550	0	797390	982360	285380	152850	688377	2.17108	0.970553	-3.34	2270.8
NUP133	0	0	0	140830	69687	0	16000	70172.3	2.13283	0.797465	-2.192	2964.6
SURF4	0	0	0	111920	94659	0	16000	68859.7	2.10559	0.924869	0.01	2046.6
RPS26;RPS26P11	0	0	767690	1087900	963600	1237000	255897	1.09617e+06	2.09883	1.45674	0	185.6
ERLIN2	325560	189390	0	928680	862020	410330	171650	733677	2.09567	1.3927	-0.855	926.6
PPP2CA;PPP2CB	0	102730	0	149090	126280	151610	34243.3	142327	2.05531	1.42941	-2.531	2528
SNRNP70	480290	0	0	637010	689990	662410	160097	663137	2.05036	1.45274	-1.346	4662.4
ACTB	28508000	61229000	22003000	182050000	132880000	144390000	3.72467e+07	1.53107e+08	2.03935	2.42184	-1.333	70808.8
RPLP2	3449100	4646800	3260900	16298000	15149000	14901000	3785600	1.54493e+07	2.02895	4.35241	-2.694	12177.6
DHRS7B	0	0	0	112100	0	82231	16000	64777	2.01741	0.901607	0.111	305.6
RAC2;RAC1;RAC3	158300	0	0	196620	167360	274700	52766.7	212893	2.01243	1.21874	-0.358	3355.4
IPO4	0	0	0	94007	48667	49190	16000	63954.7	1.99898	1.88289	-1.586	2316.6
RPS12	201930	1352700	0	2408200	1790600	1798900	518210	1.99923e+06	1.94784	1.46722	-3.447	40211
LRRC59	0	0	0	82182	55876	46741	16000	61599.7	1.94485	2.35662	-0.346	2247.8
PSMD5	0	0	0	54587	60067	69645	16000	61433	1.94094	3.81628	-0.404	758
LSM3	0	0	0	0	99440	82631	16000	60690.3	1.92339	0.922648	-1.384	1369
EEF1E1	0	0	0	0	88627	92092	16000	60239.7	1.91264	0.93456	-0.488	410.8
RRBP1	0	811570	0	1092600	932280	1019700	270523	1014860	1.90746	1.27223	-0.318	2129.4
RCOR3	0	0	0	0	78532	100710	16000	59747.3	1.9008	0.913034	0.486	1346.8
HSPA9	1577200	1121200	713990	4689300	3798000	4201300	1.13746e+06	4.22953e+06	1.89468	3.00259	-2.786	10400
TMOD3	0	0	0	66956	46805	61457	16000	58406	1.86804	3.20117	0.108	834.2
HNRNPD	312850	622360	380840	1878500	1529400	1222500	438683	1.54347e+06	1.81492	2.19305	-1.306	13106
IMMT	2379700	909570	1337800	5959400	6551200	3750200	1.54236e+06	5.42027e+06	1.81323	1.81018	-1	5300.4
RPS6	0	995600	696800	1282800	1861600	2736400	564133	1.96027e+06	1.79694	1.2711	-2.811	111526
HIST1H2BH;HIST2H2BF;HIST1H2BL;HIST1H2BM;HIST1H2BN;HIST1H2BC;HIST1H2BD;HIST1H2BK;H2BFS	6900800	11332000	14488000	31924000	38783000	40994000	1.09069e+07	3.72337e+07	1.77136	2.77348	-2.339	68.2
EIF3E	0	0	0	81924	80486	0	16000	54136.7	1.75853	0.934989	-1.605	17201.6
MATR3	222590	430380	156240	1017400	924420	793920	269737	911913	1.75735	2.4418	-0.401	14799
ATP5B	361300	0	0	542190	337400	324760	120433	401450	1.73699	0.942034	-2.485	22439.6
HSPA8	1379600	8325300	1805500	14443000	12795000	10624000	3836800	1.26207e+07	1.71781	1.60646	-0.884	41477.8
UBE2N	0	491910	0	658250	461020	485250	163970	534840	1.70568	0.991862	-1.046	1582.4
CKAP5	0	0	0	36666	56762	59884	16000	51104	1.67536	2.66484	-2.359	9128
TBKBP1	0	138090	0	144460	150190	144190	46030	146280	1.66809	1.02149	-0.301	145.8
MTDH	0	376420	0	365320	432110	380820	125473	392750	1.64623	0.985944	-0.241	4654.2
PELP1	0	0	0	0	79551	69658	16000	49736.3	1.63623	0.928626	-1.099	2457.8
HSP90B1	0	0	287950	285080	360760	241920	95983.3	295920	1.62435	0.914603	0.052	30395
EXOSC7	0	0	0	85405	62373	0	16000	49259.3	1.62233	0.900707	-2.013	942.8
TRAM1	0	0	0	59265	46340	40824	16000	48809.7	1.60909	3.06102	-0.01	4383.8
YWHAB	0	1125700	0	1047000	1400300	929240	375233	1.12551e+06	1.58472	0.870631	-0.375	4431.8
TIMM44	0	0	0	78140	63293	0	16000	47144.3	1.55901	0.91908	-1.545	945
SRP9	0	134380	0	147240	123860	116390	44793.3	129163	1.52784	0.857273	-1.675	275.8
ESYT1	0	0	0	77472	59864	0	16000	45778.7	1.5166	0.911461	-0.275	6910.2
HCFC1	0	0	0	44734	45023	45386	16000	45047.7	1.49338	8.73424	-1.98	4388.8
YBX1	981690	912470	274340	1409000	2181700	2509500	722833	2033400	1.49216	1.52646	-0.743	11040.6
PABPC1	0	151380	360620	490230	535640	382350	170667	469407	1.45966	1.23083	-1.487	57136.2
ACTN4	264200	1461000	148730	1721700	1947600	1475300	624643	1.71487e+06	1.45699	1.16219	-0.77	5606
CAP1	0	330620	0	395540	250110	261660	110207	302437	1.45642	0.736343	-0.378	6891.8
SAMM50	483110	453980	0	809380	740020	1020200	312363	856533	1.45528	1.42544	-1.668	2246
HIST1H1B	6675500	4947900	8186700	19371000	18621000	16200000	6.60337e+06	18064000	1.45184	2.991	0.034	58.4
KHDRBS1	0	514610	0	370720	408420	582810	171537	453983	1.40412	0.701817	-0.156	4416
RRP12	0	0	0	72129	53879	0	16000	42002.7	1.39241	0.905205	-1.725	2572.4
DDX3X;DDX3Y	0	798960	0	746310	752810	586430	266320	695183	1.38423	0.72179	-0.685	11116.4
CHCHD3	4606400	2713900	3005100	7135200	8477000	11096000	3441800	8.90273e+06	1.37109	1.85986	-1.046	1102.2
TUFM	177170	173260	0	334240	289020	269200	116810	297487	1.34866	1.37171	-1.563	7112.6
PDIA6	0	149060	0	143950	115250	110370	49686.7	123190	1.30995	0.654996	0.006	9141.8
SNRPG;SNRPGP15	436370	0	496490	1025300	743110	507730	310953	758713	1.28686	0.968937	-2.623	928
PRKDC	4693600	2558600	3421400	8317200	9174600	8043400	3.55787e+06	8.51173e+06	1.25844	2.65951	-0.98	25468.6
CAPG	0	1653700	0	1530100	1297100	1123400	551233	1.31687e+06	1.25637	0.609176	-0.271	1838.4
GAR1	287350	0	266170	590150	363300	360670	184507	438040	1.24739	0.99309	-1.082	980.2
C14orf166	0	229840	0	147390	210300	186090	76613.3	181260	1.24239	0.593882	-0.39	4153.2
TUBA4A	0	127510	0	106910	73208	111700	42503.3	97272.7	1.19446	0.548223	-0.367	807.2
HIST1H1C	15855000	8951500	15329000	29400000	29585000	28644000	13378500	2.92097e+07	1.12653	2.67673	0.18	429.6
YWHAE	856680	2065800	689870	3172300	2432800	2256100	1.20412e+06	2620400	1.12181	1.2859	-0.609	7450.4
PLEC	0	2385100	604930	2540700	1644200	2096900	996677	2.09393e+06	1.07102	0.651912	-1.008	836.6
TRIM28	384060	554690	471900	981400	1009200	824760	470217	938453	0.996959	2.46052	-2.753	13694.4
PES1	0	0	0	42656	46654	0	16000	29770	0.895787	0.932137	-2.147	2966.8
RPS27	1165600	1009100	742470	1704300	2137600	1481500	972390	1.77447e+06	0.867779	1.60592	n/a	1489.6
HNRNPAB	0	515120	0	286240	291900	345330	171707	307823	0.842157	0.32352	-0.132	7601
FASN	531930	439110	394560	714080	802470	811190	455200	775913	0.769395	2.4864	0.378	2821.6
HIST1H2AJ;HIST1H2AH;H2AFJ;HIST2H2AC;HIST1H2AC;HIST2H2AA3;HIST1H2AG;HIST3H2A;HIST1H2AD;HIST1H2AB;HIST1H2AA;H2AFX	7871400	4238800	13154000	12118000	13267000	15493000	8421400	13626000	0.69423	0.874223	-3.936	18.2
ANXA1	257020	256300	0	191530	149210	441240	171107	260660	0.607273	0.289646	-0.216	14512.8
YWHAZ	0	2733000	0	1402000	1264300	1357100	911000	1.34113e+06	0.55793	0.179321	-0.782	2688
HNRNPA3	735920	1043600	916550	1238300	1535900	1138500	898690	1.30423e+06	0.537307	1.27621	-1.133	3883
TMPO	550730	607500	800820	738540	1064600	943030	653017	915390	0.487267	1.0128	0.5	6932.4
HIST1H4A	2527500	3088800	12935000	9451400	7869500	8679800	6.18377e+06	8666900	0.48703	0.29511	-0.9	39.6
IQGAP1	0	1165500	0	518460	531660	531000	388500	527040	0.439998	0.131109	-0.141	7353.2
HNRNPA2B1	6504900	2160900	2254500	4868400	5281300	4116600	3640100	4.75543e+06	0.385599	0.308919	-2.1	36941
TMPO	241340	0	376280	273850	249190	193050	205873	238697	0.213421	0.105015	n/a	n/a
HIST2H3A;HIST3H3;H3F3A;HIST1H3A;H3F3C	1824900	3714200	6929600	4942500	4355800	4625900	4.15623e+06	4641400	0.159283	0.117751	-3.017	0.8
EEF1A1;EEF1A1P5	2563800	17176000	3781200	10653000	7450200	7798400	7.84033e+06	8.63387e+06	0.139092	0.0572729	-2.051	44309.4
GRN	0	592690	0	312500	0	238300	197563	183600	-0.105749	0.0212722	-0.128	3807.8
CALM1	562050	8888700	682780	3171300	3089300	3129900	3.37784e+06	3.13017e+06	-0.109863	0.0302552	0.208	2476.8
TRIM21	11522000	5994800	10288000	7320700	9777300	8397600	9.26827e+06	8.49853e+06	-0.125086	0.158613	-0.816	573.2
ATP5A1	1037000	971920	1211400	1429300	816330	644260	1073440	963297	-0.156189	0.166986	-1.699	21086
RPN1	545830	0	462530	302890	288650	294930	336120	295490	-0.185867	0.0847744	-2.053	6955.6
H2AFV;H2AFZ	3272300	0	1137100	1182400	1043000	1564700	1469800	1.26337e+06	-0.218346	0.0746073	-0.603	2977.4
TPM3	756860	3388300	1019300	1328000	1554800	1319300	1.72149e+06	1400700	-0.297507	0.141411	-0.113	5973
PGK1	0	591830	0	85418	170360	224820	197277	160199	-0.300352	0.064042	-2.807	12179
NCL	930630	2386600	1568800	1152100	1577800	1176600	1.62868e+06	1.30217e+06	-0.322786	0.298999	-1.355	47392.4
HSPA5	1382300	4379400	1449300	1803300	1615000	1652500	2.40367e+06	1.69027e+06	-0.507986	0.291657	-2.18	22348.6
HNRNPL	130560	499470	0	91640	69091	243680	210010	134804	-0.639598	0.179513	-1.532	12544
TOP1	2627600	1112400	7999900	2230300	2968000	2323500	3913300	2.50727e+06	-0.64227	0.267397	-2.691	4326.4
EEF2	648100	6180300	471810	1502800	1633600	1370200	2.4334e+06	1502200	-0.695899	0.190028	-2.337	53135.6
CFL1	0	3686600	0	640520	652980	890630	1.22887e+06	728043	-0.755232	0.151763	-2.32	15709.4
FCGR1A;FCGR1B;FCGR1C	91981000	40451000	67439000	42159000	43283000	30567000	6.66237e+07	3.86697e+07	-0.784832	0.841065	-0.483	12.8
ARG1	912760	1208300	444330	193010	513520	674660	855130	460397	-0.893266	0.680525	0.115	59
VCL	586560	433410	715720	267850	437730	194950	578563	300177	-0.946663	1.2029	-0.264	3090.8
PHF5A	11120000	12067000	0	4564700	3787200	3290500	7729000	3880800	-0.993928	0.421654	-3.296	555.4
TGM1	800490	776980	425490	208460	407080	385100	667653	333547	-1.00121	1.15024	-0.204	26.4
XP32	3280500	4581000	2147300	829340	1131900	2951400	3.33627e+06	1.63755e+06	-1.0267	0.813758	n/a	n/a
PKM	734740	2207600	0	463320	601570	358580	980780	474490	-1.04755	0.317553	-2.516	n/a
CAT	1730600	2033400	948370	736790	612960	779860	1570790	709870	-1.14586	1.23608	0.058	19425
SPRR1B	891460	3369400	0	0	628750	1233900	1.42029e+06	620883	-1.19379	0.304373	-0.021	0
SERPINB12	2669600	1904200	1410500	578840	755770	1214200	1.99477e+06	849603	-1.23136	1.30146	0.03	0.2
FLNB	729940	3989300	151590	797490	723920	534930	1623610	685447	-1.24409	0.321452	0.042	5967.4
HSPA1A;HSPA1B	164480	5408200	0	695250	762280	763260	1857560	740263	-1.3273	0.249153	-0.184	n/a
ANXA2;ANXA2P2	3401300	3290900	1701600	872520	694930	1726600	2.79793e+06	1.09802e+06	-1.34946	1.25697	0.095	2019.2
VDAC2	494020	473130	530880	176050	157540	252800	499343	195463	-1.35313	3.07712	-0.337	561.4
UBA1	0	399990	0	78854	72298	0	133330	50384	-1.40396	0.241032	-2.565	10933.2
VDAC3	1069700	254520	393940	230720	247780	162140	572720	213547	-1.42328	0.640446	-0.16	3514.4
P4HB	177890	7673100	0	1017300	1006100	886860	2.617e+06	970087	-1.43173	0.259308	-0.594	12928.8
PIP	1701700	1287000	873060	321150	555620	548390	1.28725e+06	475053	-1.43813	1.49606	-0.02	0.4
GSDMA	496470	607320	0	0	201240	202400	367930	134547	-1.45132	0.51591	-0.411	0.8
PRDX2	328130	769890	267320	149350	114910	231840	455113	165367	-1.46056	0.828487	-0.939	3668.6
GAPDH	5074300	8789700	3297000	1419800	1995000	2349800	5.72033e+06	1.92153e+06	-1.57384	1.08857	-2.742	72602
SPRR2A;SPRR2B;SPRR2D;SPRR2E;SPRR2G	1977800	2495500	1350800	181140	123160	1628400	1.94137e+06	644233	-1.59142	1.02658	-1.066	0
SERBP1	673200	891580	596580	220440	228980	251620	720453	233680	-1.62437	2.26707	-0.152	4120.6
JUP	7799600	11747000	9747900	2301900	2075800	5061100	9.76483e+06	3.14627e+06	-1.63395	1.9465	0.12	1276.8
LOR	726310	1890200	775200	0	318630	770600	1130570	363077	-1.6387	0.804823	-0.541	0.2
GGCT	1218100	2870500	867850	595140	467130	499560	1652150	520610	-1.66607	0.849521	0.117	1091.2
LMNA	658560	8363800	1032700	946540	1177500	904190	3.35169e+06	1009410	-1.73138	0.394129	-0.734	1375.6
PKP1	1281400	3949100	1353600	362590	505630	1068000	2194700	645407	-1.76574	0.791755	-0.046	0.2
TGM3	2475000	3221700	1443500	333280	745060	855510	2.38007e+06	644617	-1.88449	1.48986	-0.11	0
DSP	17260000	64602000	13706000	4754600	5886100	13461000	31856000	8033900	-1.98739	0.647219	-0.385	2.2
DSG1	12793000	18585000	8203600	2607400	3185000	4181400	1.31939e+07	3324600	-1.98861	1.5026	0.337	0
BLMH	1401400	2409200	387290	390220	252740	407920	1.3993e+06	350293	-1.99807	0.830351	0.048	2049.8
PRDX1	1451100	5822900	991010	427930	815740	804280	2.755e+06	682650	-2.01284	0.600508	0.409	5607.8
PPIA	548450	5173000	298530	334290	645550	495360	2006660	491733	-2.02885	0.404569	-0.876	2032
LYZ	1265500	1379900	791640	249160	297940	288050	1145680	278383	-2.04106	2.06306	0.478	45490
RPS27A;UBB;UBC	12665000	21896000	7923300	3983600	3006000	3021700	1.41614e+07	3337100	-2.0853	1.23536	-3.547	17892.2
FLNA	4479000	3354400	850780	1010100	634600	390430	2.89473e+06	678377	-2.09327	0.954072	-0.075	24280.8
EEF1G	0	1330800	0	181670	0	123880	443600	101850	-2.12281	0.312473	-1.136	31493
SFPQ	1407700	1042200	620310	206320	236190	261890	1.0234e+06	234800	-2.12387	1.58724	-1.77	15970.6
NPM1	654940	1677700	830540	687270	0	0	1.05439e+06	229090	-2.20243	0.992062	-1.652	19866.8
AZGP1	3545600	3846600	1976100	439770	488160	845390	3.12277e+06	591107	-2.40133	1.88543	-0.019	4.2
CTSD	1785500	2646800	1020300	344540	311730	375680	1.81753e+06	343983	-2.40157	1.45536	0.048	2166.8
TFRC	153940	106210	0	0	0	0	86716.7	16000	-2.43824	0.8883	-3.274	13220.8
LTF	613020	322620	0	0	169760	0	311880	56586.7	-2.46246	0.617002	0.111	5.2
S100A8	9275200	27369000	5739500	1133100	2385800	3910400	14127900	2.47643e+06	-2.51221	0.797937	-0.181	1003.4
MDH2	173350	1450900	160680	81307	105760	113130	594977	100066	-2.57189	0.505862	-2.475	4131.6
AMY1A;AMY2B;AMY2A	5612900	2220100	2498200	842420	508800	305340	3.44373e+06	552187	-2.64075	1.23593	-0.863	185.2
AHNAK	2408400	6224300	1560700	745900	420930	420220	3397800	529017	-2.68322	0.93236	-0.287	26799
PDIA3	0	1390200	0	70716	70021	70308	463400	70348.3	-2.71967	0.352513	-0.365	9566.8
S100A9	14004000	49418000	8186200	2538500	3154600	4427600	23869400	3.37357e+06	-2.82282	0.727702	-0.394	1728.8
EEF1B2	241440	3146700	0	0	205110	220730	1129380	141947	-2.99211	0.414413	-0.867	13499.2
STMN1;STMN2	267580	163330	0	0	0	0	143637	16000	-3.16628	0.857435	-0.628	17673.8
PRDX6	0	1155200	352850	0	0	154910	502683	51636.7	-3.28318	0.581787	0.042	4564.8
DSC1	14101000	31798000	3073600	1002900	1886800	1934700	16324200	1.60813e+06	-3.34355	0.813598	0.198	0.2
ASAH1	144340	375240	0	0	0	0	173193	16000	-3.43624	0.725442	-0.109	2011
DEFA3;DEFA1	283880	1212900	0	0	0	125790	498927	41930	-3.57277	0.548399	-0.204	0
PKP3	0	362260	220880	0	0	0	194380	16000	-3.60274	0.857139	-0.392	3.2
CSTA	9732200	26981000	4493800	1046000	712520	1433300	1.37357e+07	1063940	-3.69044	0.867447	0.382	1039.4
CRYAB	0	306470	65840	0	28629	0	124103	9543	-3.70096	0.540194	-0.448	1.4
SFN	587420	8082100	1445400	0	0	770560	3371640	256853	-3.71443	0.583181	-0.454	2.8
ENO1	509530	7103400	77787	180680	132400	229340	2.56357e+06	180807	-3.82564	0.45129	-2.352	41045.6
IGHG1	66747000	367580000	18880000	12474000	7677400	10992000	151069000	1.03811e+07	-3.86317	0.573677	n/a	n/a
TMED3	539810	0	331490	0	0	0	290433	16000	-4.18206	0.859058	-0.05	789.8
SERPINA12	592580	377550	0	0	0	0	323377	16000	-4.33707	0.868769	0.315	0.2
CASP14	4422200	19458000	2364300	111130	569610	584220	8.74817e+06	421653	-4.37485	0.704917	-0.472	0.2
SERPINB3	2792500	10399000	426050	117800	126420	326710	4.53918e+06	190310	-4.57601	0.653786	0.061	0
HSPE1	0	1034200	147290	0	0	0	393830	16000	-4.62143	0.538036	-3.593	1255.2
S100A7;S100A7A	6575900	34961000	3473100	461750	884590	394070	1.50033e+07	580137	-4.69275	0.65084	0.148	0
SBSN	4014800	77871000	2602500	378250	788150	1831000	2.81628e+07	999133	-4.81697	0.473716	-0.973	0.6
EZR	0	1813600	176500	0	69717	0	663367	23239	-4.83519	0.481388	-0.79	4044.8
ECM1	565870	524890	351860	0	0	0	480873	16000	-4.90951	2.73484	-0.254	83.6
ALDOA	183140	6120800	146310	46324	114310	48743	2.15008e+06	69792.3	-4.94518	0.451128	-2.97	12785.4
LCN1;LCN1P1	1028200	0	707040	0	0	0	578413	16000	-5.17596	0.88753	0.014	208.2
DSC3	515460	1424000	0	0	0	0	646487	16000	-5.33648	0.709157	0.186	0
IGKC	1229000	30960000	650380	0	499810	290110	10946460	263307	-5.37758	0.460977	n/a	n/a
FABP5	2444000	104510000	1223900	658390	608990	905040	36059300	724140	-5.63796	0.443422	n/a	154
HSPB1	2297500	36048000	2393900	282040	193520	308800	13579800	261453	-5.69876	0.520818	0.008	653.8
APOD	968650	995770	774390	0	0	0	912937	16000	-5.83437	3.70702	0.347	0.6
SOD1	950590	2674800	0	0	0	0	1.20846e+06	16000	-6.23896	0.704346	-2.252	3460
CALML5	3608300	138050000	1894600	0	233150	1139000	4.7851e+07	457383	-6.709	0.452653	0.021	0
IGHA1;IGHA2	2602800	2713800	1055100	0	0	0	2123900	16000	-7.0525	1.7805	n/a	n/a
CDSN	1450600	34692000	110620	59876	56226	120390	1.20844e+07	78830.7	-7.26017	0.458024	0.29	n/a
IGLC6;IGLC7	0	13908000	293910	0	0	0	4733970	16000	-8.20883	0.443168	n/a	n/a
LGALS7	376040	202030000	0	24707	0	93833	67468680	39513.3	-10.7377	0.428344	-0.91	0

## Sheet: IP-MS_CBPvsIgG
Gene names	LFQ Intensity IgG Tryp1	LFQ Intensity IgG Tryp2	LFQ Intensity IgG Tryp3	LFQ Intensity IP CBP Tryp1	LFQ Intensity IP CBP Tryp2	LFQ Intensity IP CBP Tryp3	LFQ IgG Tryp Average (Impute 0 = 11000)	LFQ IP CBP Tryp Average (Impute 0 = 11000)	Ratio CBP/IgG	log2ratio	t-test	-log(p-value)
TRA2B	0	0	0	216550000	189310000	101680000	11000	169180000	15380	13.9088	0.00814897	2.0889
RPL3	0	16400	0	48798000	45885000	45181000	5466.67	4.66213e+07	8528.29	13.058	1.90206e-06	5.72078
THRAP3	0	37957	0	66731000	147940000	70617000	12652.3	95096000	7516.08	12.8758	0.0228515	1.64109
SRRM2	0	0	96988	206530000	298550000	211460000	32329.3	2.38847e+08	7387.92	12.851	0.00132961	2.87628
SRSF6	0	0	0	38206000	61395000	109240000	11000	6.96137e+07	6328.52	12.6277	0.0291422	1.53548
SRSF7	49313	0	0	78567000	118950000	97777000	16437.7	9.84313e+07	5988.16	12.5479	0.00108	2.96658
RPL5	0	0	0	55223000	66720000	67649000	11000	6.31973e+07	5745.21	12.4881	9.34212e-05	4.02955
DDX17	0	0	50371	86746000	90196000	91406000	16790.3	8.94493e+07	5327.43	12.3792	3.5581e-07	6.44878
SRSF9	0	0	0	36772000	48156000	90531000	11000	5.84863e+07	5316.94	12.3764	0.0232536	1.63351
SRRM1	0	0	0	40315000	49889000	72089000	11000	5.40977e+07	4917.97	12.2638	0.00453957	2.34299
RBMX	71881	46737	30205	162090000	216680000	213180000	49607.7	1.97317e+08	3977.54	11.9577	0.000364203	3.43866
RPL4	0	0	0	38325000	42828000	48715000	11000	4.32893e+07	3935.39	11.9423	0.000135518	3.868
SRSF10	0	0	0	45493000	47368000	29677000	11000	40846000	3713.27	11.8585	0.00189176	2.72313
RPL7	0	0	0	41361000	37270000	43520000	11000	40717000	3701.55	11.8539	2.42995e-05	4.6144
RPL17	0	0	0	41395000	34171000	32943000	11000	3.61697e+07	3288.15	11.6831	0.000163578	3.78628
RPL21	0	0	0	32247000	35436000	34987000	11000	3.42233e+07	3111.21	11.6033	4.2909e-06	5.36745
RPL13	0	0	72924	84977000	86460000	53494000	24308	74977000	3084.46	11.5908	0.00222493	2.65268
RPL6	0	0	0	36436000	33431000	31217000	11000	3.36947e+07	3063.15	11.5808	2.40275e-05	4.61929
SRSF5	0	0	0	34202000	28780000	36796000	11000	3.32593e+07	3023.58	11.562	0.000147508	3.83118
RPS11	0	31087	0	30977000	27234000	28659000	10362.3	2.89567e+07	2794.42	11.4483	1.19839e-05	4.9214
RPL15	0	0	0	23904000	22024000	38790000	11000	2.82393e+07	2567.21	11.326	0.00598543	2.2229
RPL26	0	0	0	25800000	28041000	27142000	11000	2.69943e+07	2454.03	11.2609	2.02313e-06	5.69398
RPL18	0	0	0	26214000	23277000	28734000	11000	26075000	2370.45	11.2109	7.83216e-05	4.10612
CREBBP	0	0	0	11933000	31102000	25585000	11000	2.28733e+07	2079.39	11.0219	0.0159334	1.79769
HNRNPU	0	0	0	24158000	22985000	20861000	11000	22668000	2060.73	11.0089	1.94601e-05	4.71085
PNN	0	0	0	19717000	23592000	23690000	11000	22333000	2030.27	10.9875	6.90763e-05	4.16067
RPL31	0	0	0	25207000	28611000	12560000	11000	22126000	2011.45	10.974	0.0105667	1.97606
SAP18	0	0	0	20602000	24295000	19030000	11000	21309000	1937.18	10.9197	0.000166541	3.77848
RPL10A	33370	0	50802	56143000	50318000	50281000	28057.3	5.22473e+07	1862.16	10.8628	1.15105e-05	4.93891
RPL14	0	0	0	19287000	19118000	19907000	11000	1.94373e+07	1767.03	10.7871	1.38965e-07	6.8571
MYH9	88073	31246	74637	86838000	62389000	188370000	64652	1.12532e+08	1740.59	10.7654	0.0434197	1.36231
RPL18A	0	0	0	18430000	16531000	19908000	11000	1.82897e+07	1662.7	10.6993	4.80126e-05	4.31865
PRPF19	0	0	0	17823000	14962000	19043000	11000	17276000	1570.55	10.617	0.000139515	3.85538
RPL37A	0	0	0	19999000	13866000	17145000	11000	1.70033e+07	1545.76	10.5941	0.000659067	3.18107
RPL27	0	0	0	15456000	17973000	16350000	11000	16593000	1508.45	10.5589	2.30086e-05	4.63811
RPL32	0	0	0	16429000	17712000	14823000	11000	1.63213e+07	1483.76	10.535	4.05336e-05	4.39219
WTAP	0	0	0	15338000	17638000	15704000	11000	1.62267e+07	1475.15	10.5266	2.21468e-05	4.65469
ERH	0	0	0	9470900	21893000	14283000	11000	1.52156e+07	1383.24	10.4338	0.0136113	1.8661
RPL7A	0	0	0	12892000	16910000	15187000	11000	1.49963e+07	1363.3	10.4129	0.000209169	3.6795
RPL10	0	0	0	17914000	13622000	13026000	11000	14854000	1350.36	10.3991	0.000645617	3.19003
CKAP5	0	0	0	22085000	12931000	9324400	11000	1.47801e+07	1343.65	10.3919	0.0176661	1.75286
RPL35	0	0	0	13650000	17683000	12554000	11000	14629000	1329.91	10.3771	0.000719375	3.14304
EIF4A3	17673	45013	66044	53213000	58891000	46823000	42910	5.29757e+07	1234.58	10.2698	0.000109648	3.96
RPL8	0	106790	0	55878000	53596000	19289000	35596.7	42921000	1205.76	10.2357	0.0222822	1.65204
RPL28	0	100160	0	45016000	25629000	41858000	33386.7	37501000	1123.23	10.1334	0.00336375	2.47318
RPS9	0	0	0	14758000	12968000	9168200	11000	1.22981e+07	1118.01	10.1267	0.0017234	2.76361
RPL29	0	0	0	13151000	11953000	9492300	11000	11532100	1048.37	10.0339	0.000430967	3.36556
LACTB	0	0	0	12916000	9760400	11873000	11000	1.15165e+07	1046.95	10.032	0.000242607	3.6151
RPL34	0	0	0	10453000	11423000	12356000	11000	1.14107e+07	1037.33	10.0187	3.17488e-05	4.49827
RPL22	0	0	0	10416000	10707000	12833000	11000	1.13187e+07	1028.97	10.007	0.000119498	3.92264
RPL36	0	0	0	11483000	10884000	11156000	11000	1.11743e+07	1015.85	9.98847	3.45424e-07	6.46165
RPL35A	0	0	0	11591000	13186000	8538500	11000	1.11052e+07	1009.56	9.97951	0.00123639	2.90784
DDX21	0	0	0	10150000	12397000	10437000	11000	1.09947e+07	999.515	9.96508	9.92898e-05	4.0031
TRA2A	0	0	0	6562800	12454000	13288000	11000	1.07683e+07	978.933	9.93507	0.00704206	2.1523
MYL12A;MYL12B;MYL9	0	0	0	10654000	9777400	10996000	11000	10475800	952.345	9.89534	8.5709e-06	5.06697
ACIN1	57254	0	82113	44466000	53993000	32495000	46455.7	4.36513e+07	939.634	9.87596	0.00217906	2.66173
SNRNP40	0	0	0	11107000	8954500	9446500	11000	9836000	894.182	9.80442	0.000111967	3.95091
MAGOHB	0	0	0	7517400	11570000	9158400	11000	9.41527e+06	855.933	9.74135	0.00132392	2.87814
RPL9	0	0	0	11820000	7183900	8683900	11000	9.22927e+06	839.024	9.71257	0.00250133	2.60183
RPS19	0	0	0	9617500	11974000	5684800	11000	9092100	826.555	9.69097	0.00772629	2.11203
CDC5L	0	0	0	9128600	8544400	8957200	11000	8.87673e+06	806.976	9.65638	8.70962e-07	6.06
RPS2	0	45650	0	13438000	10537000	12731000	15216.7	1.22353e+07	804.074	9.65119	0.000151431	3.81979
MYL6	0	0	0	8224800	9341200	8660900	11000	8742300	794.755	9.63437	1.13324e-05	4.94568
RPSA	0	0	0	6351700	9467000	10235000	11000	8.68457e+06	789.506	9.62481	0.00185847	2.73084
RPS18	0	0	0	7546400	9894200	8429300	11000	8623300	783.936	9.61459	0.000228727	3.64068
BCLAF1	0	0	156850	31565000	36331000	51681000	52283.3	39859000	762.365	9.57434	0.00279501	2.55362
SNRPD3	0	0	0	9667200	9855800	5482500	11000	8.33517e+06	757.742	9.56556	0.00428718	2.36783
THOC1	0	0	0	9060000	10075000	5512600	11000	8.21587e+06	746.897	9.54477	0.00402687	2.39503
SRSF4	0	0	0	8139900	9225000	7058700	11000	8141200	740.109	9.53159	0.000200917	3.69698
RPL30	0	0	0	7278900	7977600	9129200	11000	8.12857e+06	738.961	9.52935	0.00011304	3.94677
ZC3H18	0	0	0	7814400	8026700	7908300	11000	7.91647e+06	719.679	9.49121	2.17338e-08	7.66286
RNPS1	0	0	0	6021500	7329900	8940200	11000	7.43053e+06	675.503	9.39982	0.000918531	3.03691
ZC3H13	0	0	0	6729500	8264300	6930200	11000	7308000	664.364	9.37583	0.000110002	3.9586
SNRNP200	13877	26117	35168	13844000	17113000	18536000	25054	1.64977e+07	658.484	9.36301	0.000289452	3.53842
SRRT	0	0	0	6864400	8759400	5949700	11000	7.19117e+06	653.742	9.35258	0.0009647	3.01561
THOC2	0	0	0	5930600	7809700	7058400	11000	6932900	630.264	9.29981	0.000221678	3.65428
RPL19	0	0	0	4556900	7342100	8631300	11000	6.84343e+06	622.13	9.28107	0.00470605	2.32734
PLRG1	0	0	0	7273600	7172300	5991100	11000	6.81233e+06	619.303	9.2745	7.80925e-05	4.10739
SRSF3	326080	0	375090	158180000	97421000	172830000	233723	1.4281e+08	611.023	9.25508	0.00349133	2.45701
RBM8A	0	0	0	8035500	6268800	5785400	11000	6.69657e+06	608.779	9.24977	0.000609529	3.21501
SRSF1	805700	243580	421030	325370000	309200000	224390000	490103	286320000	584.203	9.19033	0.000799409	3.09723
NMNAT1	0	0	0	6141300	5939200	6908400	11000	6.32963e+06	575.421	9.16847	2.79811e-05	4.55314
YEATS2	0	0	0	6051400	5912900	6397200	11000	6120500	556.409	9.12	1.83226e-06	5.73701
PHGDH	0	0	0	7026900	5109400	6114500	11000	6083600	553.055	9.11128	0.000390075	3.40885
CHTOP	0	0	0	4717300	6797500	6650200	11000	6055000	550.455	9.10448	0.000831475	3.08015
LCP1	0	0	0	7716000	6776500	3433300	11000	5.97527e+06	543.206	9.08536	0.0100477	1.99793
RPS12	0	0	0	5077100	6829700	5969600	11000	5958800	541.709	9.08137	0.000297435	3.52661
CRNKL1	0	0	0	7743600	6369200	3754300	11000	5955700	541.427	9.08062	0.00703028	2.15303
RPLP1	0	0	0	6479400	5089800	5623300	11000	5.73083e+06	520.985	9.0251	0.000144424	3.84036
THOC6	0	0	0	6271400	5564000	5248700	11000	5694700	517.7	9.01597	4.68089e-05	4.32967
RPL23A	97239	0	0	22674000	22276000	4939600	32413	1.66299e+07	513.062	9.00299	0.0469179	1.32866
PHF5A	0	0	0	6445500	3201900	6793000	11000	5.48013e+06	498.194	8.96056	0.00869683	2.06064
NCBP1	0	0	0	5750400	5362300	5071400	11000	5394700	490.427	8.9379	1.05069e-05	4.97853
DDX5	203330	179770	222620	93573000	88731000	107650000	201907	9.66513e+07	478.693	8.90296	7.02452e-05	4.15338
RPS5	0	0	0	4899600	6180400	4645800	11000	5.24193e+06	476.539	8.89645	0.000383057	3.41674
YBX1	0	0	0	6088700	5043500	4396300	11000	5.17617e+06	470.561	8.87824	0.000465385	3.33219
RALY	0	0	0	4787600	5232200	5004900	11000	5.00823e+06	455.294	8.83065	2.57736e-06	5.58882
HSP90AB1	0	0	0	4840300	4373100	5749700	11000	4987700	453.427	8.82473	0.000247751	3.60598
NO66	0	0	0	4505700	5025800	5168500	11000	4900000	445.455	8.79913	1.69354e-05	4.7712
RPS23	0	0	0	2965500	4904500	6725900	11000	4865300	442.3	8.78888	0.0109796	1.95941
RSL1D1	0	0	0	3931000	6218200	3938100	11000	4.69577e+06	426.888	8.73771	0.00350645	2.45513
AQR	0	0	0	4724900	4301100	4834700	11000	4.62023e+06	420.021	8.71432	9.14739e-06	5.0387
CLK3	0	0	0	4099700	4825500	4705000	11000	4543400	413.036	8.69012	3.52307e-05	4.45308
RPLP0;RPLP0P6	0	0	504880	75750000	66238000	66058000	168293	6.93487e+07	412.07	8.68675	2.72657e-05	4.56438
PRPF40A	0	0	0	2827400	4884700	5054400	11000	4255500	386.864	8.59568	0.00401401	2.39642
TOP1	0	0	0	6016000	3027800	2961600	11000	4001800	363.8	8.507	0.016499	1.78254
FMR1	0	0	0	4056300	3720900	3934700	11000	3.90397e+06	354.906	8.47129	2.37575e-06	5.6242
RPS6	0	0	0	3274500	3459600	4871600	11000	3.86857e+06	351.688	8.45815	0.00155318	2.80878
U2AF2	0	0	0	4130800	4241800	2987000	11000	3.78653e+06	344.23	8.42723	0.000701734	3.15383
DDX18	0	0	0	3935400	3551600	3605700	11000	3.69757e+06	336.142	8.39293	6.59586e-06	5.18073
RPS15A	0	0	0	3487700	3662500	3370800	11000	3507000	318.818	8.31659	2.03908e-06	5.69056
CTSG	0	0	0	3965100	3183600	3324700	11000	3.49113e+06	317.376	8.31005	0.000130868	3.88317
SNRPA1	0	0	0	3133500	3589100	3403000	11000	3375200	306.836	8.26133	1.40004e-05	4.85386
RPL39P5;RPL39	0	0	0	2112200	3260300	4720500	11000	3.36433e+06	305.848	8.25667	0.0111812	1.95151
CLK2	0	0	0	3351100	3106800	3480900	11000	3.31293e+06	301.176	8.23446	7.15205e-06	5.14557
BCAS2	0	0	0	3463500	2815900	3625700	11000	3301700	300.155	8.22956	0.000182189	3.73948
MBIP	0	0	0	3623300	3470100	2801700	11000	3.29837e+06	299.852	8.2281	0.000197456	3.70453
CDK11B;CDK11A	0	0	0	3033600	3207400	3645000	11000	3.29533e+06	299.576	8.22678	5.4578e-05	4.26298
CBLL1	0	0	0	3305700	3224300	3037200	11000	3.18907e+06	289.915	8.17949	2.30603e-06	5.63714
FXR2	0	0	0	2915700	3288400	3277900	11000	3.16067e+06	287.333	8.16658	1.34134e-05	4.87246
ALYREF	0	0	0	3371800	2989600	3096700	11000	3152700	286.609	8.16294	1.01081e-05	4.99533
CAPZA1	0	0	0	2877000	2830800	3748900	11000	3.15223e+06	286.567	8.16273	0.000455691	3.34133
RPS7	0	0	0	3237000	3482100	2478700	11000	3.06593e+06	278.721	8.12268	0.000530231	3.27554
RBM27	0	0	0	2864500	3212000	3006900	11000	3027800	275.255	8.10462	7.33278e-06	5.13473
PABPN1	0	0	0	2830900	3615500	2576100	11000	3007500	273.409	8.09492	0.000653969	3.18444
HNRNPF	0	0	0	2799100	2595500	3572800	11000	2.98913e+06	271.739	8.08608	0.000553171	3.25714
PRPF6	0	0	0	2899400	3445400	2593300	11000	2.97937e+06	270.852	8.08136	0.00028049	3.55208
HIST2H3A;HIST3H3;H3F3A;HIST1H3A;H3F3C	0	0	0	3409200	3545900	1964700	11000	2.97327e+06	270.297	8.0784	0.00418547	2.37826
SNRPD1	0	0	0	2896100	3232300	2776400	11000	2.96827e+06	269.842	8.07597	2.64312e-05	4.57788
SKIV2L2	0	0	0	2846200	2761900	3160800	11000	2.92297e+06	265.724	8.05379	1.76394e-05	4.75352
RPL36AL	0	0	0	2676600	3699600	2275700	11000	2.88397e+06	262.179	8.03441	0.00243904	2.61278
SNRPE	0	0	0	2981200	2921900	2691700	11000	2.86493e+06	260.448	8.02485	5.37817e-06	5.26937
SAP30BP	0	0	0	2842100	3181600	2496700	11000	2.84013e+06	258.194	8.01231	0.000136478	3.86494
NOP2	0	0	0	2726800	3033700	2662800	11000	2.80777e+06	255.252	7.99578	1.63923e-05	4.78536
PCBP1	0	0	0	3595300	3253400	1523000	11000	2.79057e+06	253.688	7.98691	0.0121514	1.91537
RPS25	0	0	0	2796200	2836100	2613600	11000	2.74863e+06	249.876	7.96507	2.30383e-06	5.63755
LUC7L2	0	0	0	2424400	2851500	2950800	11000	2.74223e+06	249.294	7.9617	7.05097e-05	4.15175
CDC40	0	0	0	2771800	2970300	2414700	11000	2.71893e+06	247.176	7.94939	7.48588e-05	4.12576
MATR3	49493	0	0	4116600	4682600	3369500	16497.7	4.05623e+06	245.867	7.94173	0.000446084	3.35058
FAU	0	0	0	2921300	2438100	2604300	11000	2.65457e+06	241.324	7.91483	4.78481e-05	4.32014
WDR5	0	0	0	2640000	3017700	2263700	11000	2.64047e+06	240.042	7.90715	0.000264929	3.57687
TCOF1	0	0	0	3286400	2232300	2393900	11000	2.63753e+06	239.776	7.90554	0.00129478	2.8878
TAF15	54982	48533	0	10096000	8862700	5633100	34505	8.19727e+06	237.568	7.89219	0.0035798	2.44614
THOC3	0	0	0	2947000	1956600	2651200	11000	2.51827e+06	228.933	7.83878	0.00101391	2.994
SRP72	0	0	0	2393800	3155400	1975100	11000	2508100	228.009	7.83295	0.00191182	2.71855
SNRPA	0	0	0	2877800	2482500	2071100	11000	2.47713e+06	225.194	7.81502	0.000442371	3.35421
YWHAE	0	0	0	3211700	2090200	1914500	11000	2.40547e+06	218.679	7.77267	0.00407686	2.38967
THOC5	0	0	0	2157100	2626500	2403500	11000	2395700	217.791	7.7668	6.02194e-05	4.22026
PPIL1	0	0	0	3037700	2607700	1518100	11000	2.38783e+06	217.076	7.76205	0.00616989	2.20972
U2SURP	0	0	0	2358100	3019000	1641700	11000	2339600	212.691	7.73261	0.00417308	2.37954
TUBB4B;TUBB4A	0	0	0	2284500	2395900	2280200	11000	2320200	210.927	7.7206	4.25085e-07	6.37152
SF3A2	0	0	0	2179200	3472200	1073900	11000	2.24177e+06	203.797	7.67099	0.0318332	1.49712
RPS28	0	0	0	2533500	2251000	1931000	11000	2238500	203.5	7.66888	0.000210672	3.67639
ZC3H14	0	0	0	2427100	2176200	2105200	11000	2.23617e+06	203.288	7.66738	2.15368e-05	4.66682
WIZ	0	0	0	3292600	1677200	1676100	11000	2215300	201.391	7.65385	0.0146999	1.83269
MYBBP1A	0	0	0	2038000	2114600	2436900	11000	2196500	199.682	7.64156	5.63433e-05	4.24916
SF3B2	79465	0	150520	11008000	17507000	16589000	76661.7	1.50347e+07	196.117	7.61557	0.00181155	2.74195
RBMXL1	0	0	0	2635100	2104400	1598800	11000	2.11277e+06	192.07	7.58549	0.00212108	2.67344
NOP56	0	0	0	1872900	2243500	2198600	11000	2105000	191.364	7.58017	5.56716e-05	4.25437
HP1BP3	0	0	0	2028900	2410000	1796600	11000	2078500	188.955	7.5619	0.000312974	3.50449
NHP2L1	0	0	0	1621800	2077500	2292000	11000	1997100	181.555	7.50426	0.00053938	3.26811
ACTR3	0	0	0	2355700	1826800	1720400	11000	1.96763e+06	178.876	7.48281	0.000558539	3.25295
NOP58	0	0	0	2311600	1792100	1758400	11000	1.95403e+06	177.639	7.47281	0.000400289	3.39763
SUN2	0	0	0	1827800	1987200	2029300	11000	1948100	177.1	7.46842	5.86862e-06	5.23146
RRBP1	0	0	0	1743600	1868000	2224200	11000	1.94527e+06	176.842	7.46632	0.000173849	3.75983
RPL27A	0	0	261670	19040000	6401400	20324000	87223.3	1.52551e+07	174.897	7.45036	0.026935	1.56968
EBNA1BP2	0	0	0	1722400	2015900	2016100	11000	1.91813e+06	174.376	7.44606	3.99646e-05	4.39832
RPS14	0	0	286750	14534000	14902000	20199000	95583.3	16545000	173.095	7.43542	0.0008525	3.06931
RNH1	0	0	0	2130500	1903200	1595700	11000	1.87647e+06	170.588	7.41437	0.0002668	3.57381
RPS17	0	0	0	1931100	2011600	1662900	11000	1.86853e+06	169.867	7.40826	5.95002e-05	4.22548
HNRNPR	135180	0	0	7859400	8561400	6290000	45060	7.57027e+06	168.004	7.39235	0.000364095	3.43879
CLTC	0	0	0	1838800	1771400	1925800	11000	1.84533e+06	167.758	7.39023	2.05606e-06	5.68696
FXR1	0	0	0	1795500	1839200	1804300	11000	1813000	164.818	7.36473	1.76016e-08	7.75445
RPS13	58995	90999	0	9640500	8628500	6385700	49998	8.21823e+06	164.371	7.36081	0.00105524	2.97665
DDX39B	0	0	0	1862800	1848900	1685600	11000	1799100	163.555	7.35363	5.95985e-06	5.22476
DNAJC13	0	0	0	1782300	1735000	1831800	11000	1.78303e+06	162.094	7.34069	3.61486e-07	6.44191
ISY1	0	0	0	1894700	2171500	1276200	11000	1780800	161.891	7.33888	0.00254097	2.595
RPS8	239460	0	0	13916000	12568000	11983000	79820	1.28223e+07	160.641	7.32769	2.50309e-05	4.60152
SRPK1	0	0	0	1667900	1814500	1803900	11000	1762100	160.191	7.32365	3.07395e-06	5.5123
ACTN4	0	0	0	1976600	2137300	1091200	11000	1.73503e+06	157.73	7.30132	0.00594687	2.22571
ARPC4	0	0	0	1714700	1654600	1832300	11000	1.73387e+06	157.624	7.30035	4.8939e-06	5.31034
HNRNPUL2	0	0	0	1433300	2070700	1695000	11000	1733000	157.545	7.29962	0.000723049	3.14083
ACTR2	0	0	0	1689600	1909400	1592700	11000	1.73057e+06	157.324	7.2976	5.05512e-05	4.29627
RTCB	0	0	0	2276500	1478900	1429700	11000	1.72837e+06	157.124	7.29576	0.00324846	2.48832
RBM14	378720	0	0	20017000	18510000	20979000	126240	1.98353e+07	157.124	7.29576	1.11597e-05	4.95235
RBM25	96126	0	0	3857900	6317900	4854500	32042	5010100	156.36	7.28873	0.00223817	2.65011
RFC3	0	0	0	1881200	1793600	1427700	11000	1.70083e+06	154.621	7.27259	0.00025533	3.5929
HNRNPD	0	0	0	1758100	1542100	1754700	11000	1.68497e+06	153.179	7.25907	1.91587e-05	4.71763
SLTM	0	0	0	1578500	1580300	1823200	11000	1.66067e+06	150.97	7.23812	3.38692e-05	4.4702
YTHDC1	0	0	0	1619900	1846900	1496200	11000	1.65433e+06	150.394	7.2326	8.68418e-05	4.06127
SF3B1	75281	0	136540	11408000	13318000	7004600	70607	1.05769e+07	149.799	7.22689	0.00493072	2.30709
LYAR	0	0	0	1642900	1218200	2016000	11000	1625700	147.791	7.20741	0.00212989	2.67164
THOC7	0	0	0	1751900	1599900	1523900	11000	1.62523e+06	147.748	7.207	1.71611e-05	4.76545
PPIE	0	0	0	1543100	1438800	1710200	11000	1.56403e+06	142.185	7.15162	3.84814e-05	4.41475
CCT3	0	0	0	1573500	1661700	1426400	11000	1.55387e+06	141.261	7.14222	2.25398e-05	4.64705
CCT8	0	56419	0	3664600	1901800	2383600	18806.3	2650000	140.91	7.13863	0.00749637	2.12515
TFAM	0	0	0	1505700	1582600	1559500	11000	1.54927e+06	140.842	7.13794	2.80107e-07	6.55268
ZZZ3	0	0	0	1604500	1612200	1397800	11000	1.53817e+06	139.833	7.12756	2.57001e-05	4.59007
RPS3	85446	247060	135410	24772000	19550000	20779000	155972	2.17003e+07	139.13	7.12029	0.000166261	3.77921
RPS24	0	0	0	1670500	1485500	1364300	11000	1.50677e+06	136.979	7.09781	7.14602e-05	4.14594
HNRNPK	150340	97110	97799	16692000	16683000	13608000	115083	15661000	136.084	7.08836	0.000110882	3.95514
SNRPB2	0	0	0	1511900	1320400	1617700	11000	1.48333e+06	134.848	7.0752	6.94143e-05	4.15855
HNRNPC	97765	105130	445330	38094000	25994000	22851000	216075	2.89797e+07	134.119	7.06737	0.00346571	2.46021
NCBP2	0	0	0	1466300	1357900	1568400	11000	1464200	133.109	7.05647	1.76069e-05	4.75432
RFC5	0	0	0	1550400	1417900	1417300	11000	1.46187e+06	132.897	7.05416	5.01407e-06	5.29981
RFC2	0	0	0	1639400	1408100	1334900	11000	1460800	132.8	7.05311	9.10283e-05	4.04082
SF3A3	0	0	118060	5053800	5713800	4701400	39353.3	5.15633e+06	131.027	7.03372	6.86706e-05	4.16323
H1FX	0	0	0	1354400	1492900	1463600	11000	1.43697e+06	130.633	7.02938	4.41259e-06	5.35531
RPS4X	195920	66346	0	11087000	9690200	13471000	87422	1.14161e+07	130.586	7.02885	0.000510762	3.29178
SF3A1	145910	0	118560	8545800	13903000	10857000	88156.7	1.11019e+07	125.934	6.97653	0.00208228	2.68146
ZCCHC8	0	0	0	1161800	1513100	1420200	11000	1.36503e+06	124.094	6.95529	0.000202745	3.69305
PABPC1	0	0	0	1311800	1436300	1345200	11000	1.36443e+06	124.039	6.95465	3.30042e-06	5.48143
PTDSS1	0	0	0	1412400	1269200	1388700	11000	1.35677e+06	123.342	6.94653	6.78012e-06	5.16876
SON	0	0	0	1414000	1406200	1224100	11000	1348100	122.555	6.93728	2.65379e-05	4.57613
SAFB	0	0	0	1195300	1230500	1617000	11000	1347600	122.509	6.93674	0.000567232	3.24624
RPA2	0	0	0	313480	1349800	2316400	11000	1326560	120.596	6.91404	0.0835017	1.0783
RPL13A	477020	0	0	20577000	13473000	23332000	159007	1.91273e+07	120.293	6.9104	0.00297537	2.52646
CWC15	0	0	0	1176200	1450600	1325200	11000	1.31733e+06	119.758	6.90397	7.6959e-05	4.11374
PRPF4B	0	0	0	1287600	1388500	1257600	11000	1.31123e+06	119.203	6.89728	4.95713e-06	5.30477
SF3B6	0	0	0	1297400	1268700	1352700	11000	1.30627e+06	118.752	6.8918	7.59114e-07	6.11969
SYNCRIP	0	0	0	1090000	1275200	1488400	11000	1.28453e+06	116.776	6.8676	0.000366958	3.43538
EIF4A1	49621	44181	33046	5157100	4310600	5200100	42282.7	4.88927e+06	115.633	6.85341	7.47195e-05	4.12657
SUGP2	0	0	0	1102900	1612900	1093300	11000	1269700	115.427	6.85084	0.00178038	2.74949
ARHGAP1	0	0	0	1629300	1152900	1009400	11000	1.26387e+06	114.897	6.8442	0.00251714	2.59909
CCDC12	0	0	0	1197400	1275600	1291700	11000	1254900	114.082	6.83393	1.73427e-06	5.76088
NOP16	0	0	0	1126800	1503300	1105900	11000	1.24533e+06	113.212	6.82288	0.000646455	3.18946
CBFB	0	0	0	1195400	1149600	1384400	11000	1.24313e+06	113.012	6.82033	6.55267e-05	4.18358
DHX8	0	0	0	1285400	1174200	1231700	11000	1.23043e+06	111.858	6.80552	2.76914e-06	5.55766
LUC7L3	0	0	0	1033900	1052300	1601100	11000	1229100	111.736	6.80395	0.00272242	2.56505
SF3B4	0	0	0	1183600	898600	1540300	11000	1207500	109.773	6.77838	0.00288186	2.54033
KIAA0020	0	0	0	1023100	1446900	1147000	11000	1.20567e+06	109.606	6.77618	0.000662506	3.17881
SNRPF	0	0	0	1055400	1086400	1445800	11000	1.19587e+06	108.715	6.76441	0.000672839	3.17209
U2AF1	0	0	0	965570	783320	1821400	11000	1.1901e+06	108.191	6.75743	0.0204927	1.6884
SF3B5	0	0	0	1369200	1193200	963290	11000	1175230	106.839	6.7393	0.00056195	3.2503
TUBB;TUBB2B	163970	0	259560	18008000	11025000	15599000	141177	1.48773e+07	105.381	6.71947	0.00198147	2.70301
CCT4	0	0	0	1506500	964490	995410	11000	1.15547e+06	105.042	6.71483	0.00276988	2.55754
DDX50	0	0	0	1197200	1188200	1079500	11000	1.15497e+06	104.997	6.7142	6.85147e-06	5.16422
RBM15	0	0	0	1004800	1163700	1271600	11000	1146700	104.245	6.70384	0.000121379	3.91586
DHX30	0	0	0	840250	1279600	1309800	11000	1.14322e+06	103.929	6.69945	0.00166193	2.77939
SRP68	0	0	0	1200100	1088400	1113300	11000	1.13393e+06	103.085	6.68769	4.73943e-06	5.32427
SDAD1	0	0	0	1128000	1245500	1012800	11000	1.12877e+06	102.615	6.6811	7.35191e-05	4.1336
PPP1CA	0	0	0	1134800	1222300	1019900	11000	1.12567e+06	102.333	6.67713	4.32986e-05	4.36353
ZNF830	0	0	0	1132600	991720	1251900	11000	1.12541e+06	102.31	6.6768	0.000116097	3.93518
DDX3X;DDX3Y	0	0	0	962720	1106600	1275100	11000	1.11481e+06	101.346	6.66315	0.000247042	3.60723
RPS21	0	0	0	1149400	954390	1237600	11000	1.1138e+06	101.254	6.66184	0.000184106	3.73493
TLN1	0	0	0	1107600	1160200	1040600	11000	1102800	100.255	6.64752	5.78186e-06	5.23793
PPIG	0	0	0	1044200	1144900	1087400	11000	1.09217e+06	99.2879	6.63355	3.03744e-06	5.51749
SNRPD2	0	0	230860	8698200	8575300	5377500	76953.3	7.55033e+06	98.1157	6.61641	0.00236677	2.62584
CSRP2BP	0	0	0	1051400	1066500	1114400	11000	1.07743e+06	97.9485	6.61395	5.77863e-07	6.23817
RPL11	557110	0	0	19744000	18889000	14313000	185703	1.76487e+07	95.0369	6.57042	0.000502051	3.29925
GPATCH8	0	0	0	974880	1142800	986600	11000	1034760	94.0691	6.55565	4.41094e-05	4.35547
CWC22	0	0	0	790430	1062700	1233400	11000	1.02884e+06	93.5312	6.54738	0.00133902	2.87321
RUVBL1	0	0	0	1050800	912490	1114300	11000	1.02586e+06	93.2603	6.54319	6.67422e-05	4.1756
CFAP20	0	0	0	957080	1175800	940630	11000	1.0245e+06	93.1367	6.54128	0.000173391	3.76097
YWHAZ	0	0	0	1179100	979590	910090	11000	1.02293e+06	92.9933	6.53906	0.000222245	3.65317
MRTO4	0	0	0	897730	973870	1192100	11000	1.02123e+06	92.8394	6.53667	0.000318074	3.49747
ZCCHC3	0	0	0	1369300	887400	791940	11000	1.01621e+06	92.383	6.52956	0.00471982	2.32607
WBP11	0	0	0	991890	1093800	917880	11000	1001190	91.0173	6.50807	3.96973e-05	4.40124
RPL12	0	622790	784070	52527000	38048000	36102000	468953	4.22257e+07	90.0424	6.49253	0.00129246	2.88858
CCT2	0	0	0	1056000	837620	1072300	11000	988640	89.8764	6.48987	0.000197977	3.70339
EIF6	0	0	0	1246700	1126500	546180	11000	973127	88.4661	6.46705	0.0108268	1.9655
NPM1	0	0	0	926590	950960	1029000	11000	968850	88.0773	6.4607	6.15577e-06	5.21072
CSE1L	0	0	0	853340	1062300	959190	11000	958277	87.1161	6.44487	9.17784e-05	4.03726
SLC25A11	0	0	0	1068500	911790	893900	11000	958063	87.0967	6.44455	6.58919e-05	4.18117
MRPS22	0	0	0	929490	1097900	833980	11000	953790	86.7082	6.4381	0.00024602	3.60903
USP39	0	0	0	960070	992510	898580	11000	950387	86.3988	6.43294	4.20957e-06	5.37576
YLPM1	0	0	0	1218800	836790	794350	11000	949980	86.3618	6.43232	0.0021474	2.66809
C7orf50	0	0	0	956330	989570	888090	11000	944663	85.8785	6.42422	5.95783e-06	5.22491
ARPC1B	0	0	0	1148000	878810	800760	11000	942523	85.6839	6.42095	0.000858009	3.06651
SRSF2	0	702850	65733	19917000	26356000	19466000	256194	21913000	85.5327	6.4184	0.000636559	3.19616
GTPBP4	0	0	0	868810	879650	1061200	11000	936553	85.1412	6.41179	0.000114833	3.93993
POLDIP3	0	0	0	934240	922840	942930	11000	933337	84.8488	6.40682	9.05097e-09	8.0433
CTNNBL1	0	0	0	881100	794430	1095000	11000	923510	83.9555	6.39155	0.000493836	3.30642
BRIX1	0	0	0	970470	838840	924050	11000	911120	82.8291	6.37207	1.89901e-05	4.72147
ILF2	0	0	291840	10351000	4415400	9390300	97280	8.05223e+06	82.7738	6.3711	0.012461	1.90445
BAG2	0	0	0	1057300	960550	707620	11000	908490	82.59	6.3679	0.000954811	3.02008
CWC27	0	0	0	971430	879290	871360	11000	907360	82.4873	6.3661	9.33979e-06	5.02966
RPS20	97789	0	158240	8403300	6946800	5711200	85343	7.02043e+06	82.2614	6.36214	0.00088151	3.05477
RBBP4	0	0	0	989930	842300	881900	11000	904710	82.2464	6.36188	3.33946e-05	4.47632
DNAJC9	0	0	0	947090	833320	921490	11000	900633	81.8758	6.35536	1.27326e-05	4.89508
DDX24	0	0	0	988500	915010	788760	11000	897423	81.5839	6.35021	0.000104111	3.9825
RPA1	0	0	0	975750	941870	767100	11000	894907	81.3552	6.34616	0.000157865	3.80171
BUD31	0	0	0	943660	923750	791950	11000	886453	80.5867	6.33247	4.89385e-05	4.31035
HMGA1	0	0	0	1138200	1109100	400800	11000	882700	80.2455	6.32635	0.0215577	1.6664
HAX1	0	0	0	427750	1512000	704580	11000	881443	80.1312	6.32429	0.053534	1.27137
BCLAF1	0	0	0	678860	744400	1212100	11000	878453	79.8594	6.31939	0.00637398	2.19559
ATAD3B	0	0	0	856550	1139900	619950	11000	872133	79.2848	6.30897	0.00438731	2.3578
TECR	0	0	0	1062400	850740	679920	11000	864353	78.5776	6.29605	0.00144796	2.83924
CCNK	0	0	0	932700	807530	814900	11000	851710	77.4282	6.27479	3.03703e-05	4.51755
DKC1	0	0	0	660170	803080	1047100	11000	836783	76.0712	6.24928	0.00177179	2.75159
SRP14	0	0	0	1111000	945660	453540	11000	836733	76.0667	6.24919	0.0132885	1.87652
MFAP1	0	0	0	872690	814370	806550	11000	831203	75.5639	6.23963	2.37269e-06	5.62476
SF3B3	158580	186240	0	8598100	8659800	8358900	114940	8.53893e+06	74.2904	6.2151	1.65345e-07	6.78161
SSFA2	0	0	0	981970	790070	675860	11000	815967	74.1788	6.21293	0.000796431	3.09885
DHX16	0	0	0	817860	780170	840600	11000	812877	73.8979	6.20746	1.32094e-06	5.87912
SLAIN2	0	400270	0	5809800	20531000	2883400	133423	9741400	73.0112	6.19005	0.153395	0.814188
HADHA	0	0	0	794530	764920	842460	11000	800637	72.7852	6.18557	3.78322e-06	5.42214
PLEC	0	0	0	822330	759320	798440	11000	793363	72.1239	6.17241	1.71688e-06	5.76526
MRPS27	0	0	0	866230	754430	736250	11000	785637	71.4215	6.15829	4.21933e-05	4.37476
MYO1C	0	0	0	763970	682530	908420	11000	784973	71.3612	6.15707	0.00028706	3.54203
SNRPB;SNRPN	74687	100090	110210	6453800	7573000	6109100	94995.7	6.71197e+06	70.6555	6.14273	0.000115976	3.93563
MYO1F	0	0	0	816680	740600	761670	11000	772983	70.2712	6.13486	4.42071e-06	5.35451
FYTTD1	0	0	0	828400	786850	673380	11000	762877	69.3524	6.11587	7.9635e-05	4.0989
RRS1	0	0	0	905810	719170	661120	11000	762033	69.2758	6.11428	0.000496774	3.30384
RPS4Y1	0	0	0	862160	749870	670400	11000	760810	69.1645	6.11196	0.000165514	3.78116
PHRF1	0	0	0	731150	778040	758380	11000	755857	68.7142	6.10254	6.26512e-07	6.20307
BUD13	0	0	0	779510	728370	710970	11000	739617	67.2379	6.0712	3.57087e-06	5.44723
ZNF326	0	0	0	687270	798480	709780	11000	731843	66.5312	6.05596	2.738e-05	4.56257
CAPG	0	0	0	831740	695670	644640	11000	724017	65.8197	6.04045	0.000204129	3.6901
KAT2A	0	0	0	787730	780970	575000	11000	714567	64.9606	6.02149	0.000513482	3.28948
RPS10	84224	179770	0	5895100	6361300	4675800	87998	5.64407e+06	64.1386	6.00312	0.00038838	3.41074
RRP8	0	0	0	549620	886220	676380	11000	704073	64.0067	6.00015	0.0019997	2.69903
PTCD3	0	0	0	827350	606740	671990	11000	702027	63.8206	5.99595	0.000427703	3.36886
FERMT3	0	0	0	675470	766690	646450	11000	696203	63.2912	5.98393	4.31973e-05	4.36454
SNRNP70	0	0	0	715460	814100	538910	11000	689490	62.6809	5.96995	0.0010201	2.99136
MTDH	0	0	0	649250	746390	672380	11000	689340	62.6673	5.96964	1.93394e-05	4.71356
CFL1	0	0	0	602730	703140	719160	11000	675010	61.3645	5.93933	4.99553e-05	4.30142
GPKOW	0	0	0	810730	642610	562770	11000	672037	61.0942	5.93296	0.000776617	3.10979
TCP1	0	0	0	663340	613550	720930	11000	665940	60.54	5.91982	2.78619e-05	4.55499
ARPC3	0	0	0	902340	524440	562700	11000	663160	60.2873	5.91378	0.00525265	2.27962
RPS15	0	0	0	396000	528390	1061800	11000	662063	60.1876	5.91139	0.0312706	1.50486
SNW1	0	112280	104380	5315800	5503200	2181500	72220	4333500	60.0042	5.90699	0.0167747	1.77534
RPL24	190900	179040	0	13239000	4451300	4276400	123313	7.32223e+06	59.3791	5.89188	0.071786	1.14396
RBM34	0	0	0	730010	752330	470100	11000	650813	59.1648	5.88667	0.00198821	2.70154
ARPC2	0	0	0	622520	606790	716120	11000	648477	58.9524	5.88148	4.51747e-05	4.3451
PRMT1	0	0	0	611220	597160	712210	11000	640197	58.1997	5.86294	6.02806e-05	4.21982
PAXBP1	0	0	0	732020	647130	540960	11000	640037	58.1852	5.86258	0.000317648	3.49805
PPIL2	0	0	0	696330	537510	683420	11000	639087	58.0988	5.86044	0.00023199	3.63453
PRPF8	312680	396850	296980	18955000	23312000	15949000	335503	1.94053e+07	57.8395	5.85398	0.000872901	3.05904
SART1	0	0	0	623930	686180	591310	11000	633807	57.6188	5.84847	2.20145e-05	4.65729
YWHAB	0	0	0	641910	621390	630880	11000	631393	57.3994	5.84296	4.66307e-08	7.33133
RUVBL2	0	0	0	654120	598160	636250	11000	629510	57.2282	5.83865	2.82035e-06	5.5497
CCT7	0	0	0	745440	560650	572560	11000	626217	56.9288	5.83109	0.00046729	3.33041
SRP9	0	0	0	592440	994730	286970	11000	624713	56.7921	5.82762	0.0380974	1.4191
CLASRP	0	0	0	772810	624950	470440	11000	622733	56.6121	5.82304	0.00204184	2.68998
DAP3	0	0	0	708410	571020	562990	11000	614140	55.8309	5.80299	0.00020121	3.69635
FBL	190050	0	0	3747400	3554500	3298400	63350	3.53343e+06	55.7764	5.80158	1.79092e-05	4.74692
PDCD6IP	0	0	0	502300	626930	676110	11000	601780	54.7073	5.77366	0.000312001	3.50584
RPL23	0	0	421250	8690700	8788400	5513600	140417	7.66423e+06	54.5821	5.77036	0.00226935	2.6441
PHB2	0	0	0	717660	494150	581610	11000	597807	54.3461	5.7641	0.000777688	3.10919
CACTIN	0	0	0	612170	679360	494030	11000	595187	54.1079	5.75777	0.000389906	3.40904
PPHLN1	0	0	0	703900	594060	472950	11000	590303	53.6639	5.74588	0.000899836	3.04584
SAMM50	0	0	0	767570	466320	525220	11000	586370	53.3064	5.73624	0.00313093	2.50433
PRPF4	0	0	0	490960	706920	542490	11000	580123	52.7385	5.72078	0.000877609	3.0567
NHP2	0	0	0	619020	594410	525690	11000	579707	52.7006	5.71975	3.18222e-05	4.49727
DIMT1	0	0	0	570650	543540	618870	11000	577687	52.517	5.71471	1.25643e-05	4.90086
ARHGEF1	0	0	0	337870	551050	818060	11000	568993	51.7267	5.69284	0.0148998	1.82682
KPNB1	0	0	0	653390	487510	560020	11000	566973	51.543	5.68771	0.000294306	3.5312
HSPA1A;HSPA1B	0	0	0	596640	752370	338950	11000	562653	51.1503	5.67667	0.00953629	2.02062
TRIM28	0	0	0	611290	520910	554630	11000	562277	51.1161	5.6757	2.86017e-05	4.54361
AHSA1	0	0	0	780440	427260	463940	11000	557213	50.6558	5.66265	0.00765127	2.11627
TADA2A	0	0	0	647290	543350	480940	11000	557193	50.6539	5.6626	0.000328154	3.48392
HNRNPM	930700	1329300	1667900	57716000	77169000	62451000	1309300	6.57787e+07	50.2396	5.65075	0.000388151	3.411
C14orf166	0	0	0	663100	499100	495030	11000	552410	50.2191	5.65016	0.000566605	3.24672
ILF3	0	0	0	592200	504010	527900	11000	541370	49.2155	5.62104	3.30694e-05	4.48057
TBK1	0	0	0	564370	616780	431520	11000	537557	48.8688	5.61084	0.000619865	3.2077
CCNL2	0	0	0	492270	551340	567560	11000	537057	48.8233	5.6095	1.95199e-05	4.70952
DOCK8	0	0	0	577020	468580	562060	11000	535887	48.717	5.60635	9.38946e-05	4.02736
TFIP11	0	0	0	455970	440530	708810	11000	535103	48.6458	5.60424	0.00353979	2.45102
APOBEC3B	0	0	0	488960	588790	517200	11000	531650	48.3318	5.5949	5.73177e-05	4.24171
CCDC9	0	0	0	625260	535020	428780	11000	529687	48.1533	5.58956	0.000735096	3.13366
RPS3A	0	455560	539740	20713000	16873000	9736800	331767	1.57743e+07	47.5463	5.57126	0.00867652	2.06165
FLNB	0	0	0	717930	393880	455800	11000	522537	47.5033	5.56996	0.00624928	2.20417
FNBP4	0	0	0	512480	495990	530400	11000	512957	46.6324	5.54326	8.42595e-07	6.07438
RPS29	0	0	0	748720	790010	0	11000	512910	46.6282	5.54313	0.116403	0.934036
RPA3	0	0	0	559730	517660	461300	11000	512897	46.627	5.54309	5.61519e-05	4.25064
CCT6A	0	0	0	660980	454390	422960	11000	512777	46.6161	5.54276	0.00235325	2.62833
PTPN6	0	0	0	463950	448230	618150	11000	510110	46.3736	5.53523	0.000710904	3.14819
CDK12	0	0	0	630490	437940	459900	11000	509443	46.313	5.53335	0.00111356	2.95329
HNRNPDL	0	0	0	390680	558910	569950	11000	506513	46.0467	5.52502	0.000947505	3.02342
FASN	0	0	0	467260	451570	595290	11000	504707	45.8824	5.51987	0.000376289	3.42448
RPS26;RPS26P11	0	409260	0	6156200	6501100	6052300	136420	6.23653e+06	45.7157	5.51462	5.89573e-06	5.22946
POLRMT	0	0	0	473160	550910	479490	11000	501187	45.5624	5.50977	3.61264e-05	4.44218
CCT5	0	0	0	500360	510330	488260	11000	499650	45.4227	5.50534	1.59425e-07	6.79744
IK	0	0	0	454750	663440	380190	11000	499460	45.4055	5.50479	0.0041492	2.38204
EXOSC10	0	0	0	415820	462170	618820	11000	498937	45.3579	5.50328	0.00124875	2.90353
C11orf98	0	0	0	674020	812660	0	11000	495560	45.0509	5.49348	0.119564	0.922399
MRPS2	0	0	0	548320	436600	487760	11000	490893	44.6267	5.47983	0.000109141	3.96201
SSBP1	0	0	0	473620	435060	558670	11000	489117	44.4652	5.4746	0.000179641	3.74559
PPIL3	0	0	0	504170	427670	532690	11000	488177	44.3797	5.47183	9.93441e-05	4.00286
MYO1G	378960	0	1026300	19798000	18503000	23274000	468420	20525000	43.8175	5.45344	0.000160767	3.7938
CHD1	0	0	0	425630	475040	537810	11000	479493	43.5903	5.44594	0.000122254	3.91274
MRPS18B	0	0	0	543830	574150	317420	11000	478467	43.497	5.44284	0.00411058	2.3861
LIG3	0	0	0	457080	464150	503190	11000	474807	43.1642	5.43176	4.95864e-06	5.30464
MRPS9	0	0	0	478460	485400	451170	11000	471677	42.8797	5.42222	1.43932e-06	5.84184
SAFB2	0	0	0	424710	458360	530780	11000	471283	42.8439	5.42102	0.000113296	3.94578
RPF2	0	0	0	582660	417360	398060	11000	466027	42.3661	5.40484	0.00135254	2.86885
GFI1	0	0	0	485500	457490	450350	11000	464447	42.2224	5.39994	1.70101e-06	5.76929
RNF113A	0	0	0	469110	481440	439440	11000	463330	42.1209	5.39646	3.12703e-06	5.50487
MRPS34	0	0	0	457350	503940	425590	11000	462293	42.0267	5.39323	3.46422e-05	4.4604
HADHB	0	0	0	383800	486870	512190	11000	460953	41.9048	5.38905	0.000301119	3.52126
CCNL1	0	0	0	513760	475470	389410	11000	459547	41.777	5.38464	0.00023575	3.62755
DHX15	74623	0	197670	4135700	4526500	2709400	90764.3	3.79053e+06	41.7624	5.38413	0.00263479	2.57925
C9orf78	0	0	0	433300	474450	444140	11000	450630	40.9664	5.35637	3.32921e-06	5.47766
RBM7	0	0	0	406080	436940	494450	11000	445823	40.5294	5.3409	6.67718e-05	4.17541
DDX55	0	0	0	453280	395240	482870	11000	443797	40.3452	5.33432	6.63716e-05	4.17802
PRPF31	0	0	0	389910	428640	509670	11000	442740	40.2491	5.33088	0.000232093	3.63434
MRPS17	0	0	0	507880	439860	359770	11000	435837	39.6215	5.30821	0.000523999	3.28067
FIP1L1	0	0	0	390640	520990	385920	11000	432517	39.3197	5.29718	0.000614285	3.21163
HNRNPAB	0	0	0	459140	420090	413300	11000	430843	39.1676	5.29159	7.19503e-06	5.14297
DIAPH1	0	0	0	334090	547420	393440	11000	424983	38.6348	5.27183	0.00260334	2.58447
CCDC101	0	0	0	462400	384260	425410	11000	424023	38.5476	5.26857	4.72483e-05	4.32561
DDX23	0	0	0	413090	424230	431990	11000	423103	38.4639	5.26543	1.69268e-07	6.77143
CACYBP	0	0	0	519980	361240	385590	11000	422270	38.3882	5.26259	0.00102486	2.98933
TBKBP1	0	0	0	458570	595040	212090	11000	421900	38.3545	5.26133	0.0196894	1.70577
C1QBP	223640	0	249620	6555600	6374200	5136300	157753	6.02203e+06	38.1737	5.25451	0.000205287	3.68764
YWHAG	0	0	0	525180	487150	213560	11000	408630	37.1482	5.21522	0.0141076	1.85055
LONP1	0	0	0	402180	397100	420520	11000	406600	36.9636	5.20803	5.60741e-07	6.25124
ATXN2L	0	0	0	386410	416280	416110	11000	406267	36.9333	5.20685	2.1316e-06	5.67129
RFC1	0	0	0	374550	449390	387800	11000	403913	36.7194	5.19847	6.23581e-05	4.20511
MRPS25	0	0	0	374110	441120	391570	11000	402267	36.5697	5.19258	3.65679e-05	4.4369
HDAC1	0	0	0	447750	383270	362270	11000	397763	36.1603	5.17633	0.000101999	3.99141
LRCH4	0	0	0	399910	328250	459180	11000	395780	35.98	5.16912	0.000472812	3.32531
DGCR14	0	0	0	434280	399090	349730	11000	394367	35.8515	5.16396	8.74228e-05	4.05838
ATAD3A	332790	117240	261690	9037500	7547900	8928400	237240	8504600	35.8481	5.16382	6.86516e-05	4.16335
MYADM	0	0	0	482330	397500	301840	11000	393890	35.8082	5.16222	0.00164456	2.78395
DHX9	93145	0	251550	4422600	4121300	3729600	114898	4.09117e+06	35.6068	5.15408	4.9047e-05	4.30939
PML	0	0	0	428370	327190	419370	11000	391643	35.6039	5.15396	0.00026644	3.5744
RRP1	0	0	0	282130	319290	570730	11000	390717	35.5197	5.15055	0.0125414	1.90165
IQGAP1	0	0	0	296570	356850	514070	11000	389163	35.3785	5.1448	0.00387634	2.41158
PGAM5	1093300	1432500	1606500	50759000	51997000	39575000	1.37743e+06	4.74437e+07	34.4435	5.10616	0.000310082	3.50852
SNIP1	0	0	0	402320	400860	332900	11000	378693	34.4267	5.10545	7.83194e-05	4.10613
SCAF11	0	0	0	367170	402610	360860	11000	376880	34.2618	5.09853	8.40979e-06	5.07521
CXorf56	0	0	0	269860	476840	378980	11000	375227	34.1115	5.09219	0.0032889	2.48295
TIMM50	0	0	0	313170	431450	379790	11000	374803	34.073	5.09056	0.000395422	3.40294
BANF1	0	0	0	460260	291120	370070	11000	373817	33.9833	5.08676	0.00156856	2.8045
ACTN1	0	0	0	345920	356210	416140	11000	372757	33.887	5.08266	6.97969e-05	4.15616
UBE2N	0	0	0	433510	311570	358310	11000	367797	33.4361	5.06333	0.000490954	3.30896
PRPF38A	0	0	0	342490	383890	372960	11000	366447	33.3133	5.05803	7.77429e-06	5.10934
NUDC	0	0	0	379930	243060	458530	11000	360507	32.7733	5.03445	0.00460357	2.33691
SDCBP	0	0	0	327190	355510	377720	11000	353473	32.1339	5.00603	1.73718e-05	4.76016
RBM22	0	266060	0	3970100	2799100	1758400	88686.7	2.84253e+06	32.0514	5.00232	0.0129522	1.88766
ARHGAP4	0	0	0	354020	326950	365950	11000	348973	31.7248	4.98754	7.11693e-06	5.14771
EFTUD2	350120	89002	1657800	26090000	20303000	19817000	698974	22070000	31.5749	4.9807	0.000498984	3.30191
HNRNPH1	0	456540	313610	7901700	8267500	7970900	256717	8046700	31.3447	4.97015	1.53697e-06	5.81333
PPIA	0	0	0	328750	353780	349650	11000	344060	31.2782	4.96708	1.53726e-06	5.81325
HSP90AA1	211560	247450	477530	11077000	10357000	7762400	312180	9.73213e+06	31.1747	4.96231	0.000735654	3.13333
PPWD1	0	0	0	372190	350070	306230	11000	342830	31.1664	4.96192	6.0012e-05	4.22176
PUF60	0	65904	112920	2089100	2149100	1331900	59608	1856700	31.1485	4.96109	0.00246828	2.60761
ARPC5	0	0	0	430950	596930	0	11000	342627	31.1479	4.96106	0.126383	0.89831
NAT10	0	0	0	345990	361100	313580	11000	340223	30.9294	4.95091	1.70958e-05	4.76711
RBM28	0	0	0	419760	368580	206070	11000	331470	30.1336	4.9133	0.00676465	2.16975
RPS16	796770	0	597300	17203000	11177000	12664000	464690	1.36813e+07	29.4419	4.8798	0.00194198	2.71175
RNPC3	0	0	0	323180	285680	347850	11000	318903	28.9912	4.85754	6.06006e-05	4.21752
SMU1	73968	154350	241280	5499300	4169900	3939100	156533	4536100	28.9786	4.85692	0.000856984	3.06703
ATXN10	0	0	0	342510	278320	320800	11000	313877	28.5342	4.83462	7.62161e-05	4.11795
PPP2R1A	0	0	0	374330	289480	273990	11000	312600	28.4182	4.82874	0.000556955	3.25418
HNRNPH2	0	0	0	472340	251210	204640	11000	309397	28.127	4.81388	0.0200003	1.69896
AKAP8	0	0	0	295730	357540	274270	11000	309180	28.1073	4.81287	0.000244181	3.61229
SDE2	0	0	0	406080	508970	0	11000	305017	27.7288	4.79331	0.121121	0.91678
SLU7	0	0	0	382650	297080	234680	11000	304803	27.7094	4.7923	0.00207118	2.68378
TMEM33	0	0	0	325210	325000	250670	11000	300293	27.2994	4.7708	0.000267353	3.57291
ARHGAP17	0	0	0	301980	284380	311640	11000	299333	27.2121	4.76618	3.01605e-06	5.52056
XRCC6	0	0	0	332110	254360	306720	11000	297730	27.0664	4.75843	0.00020162	3.69547
SQRDL	0	0	0	288260	267420	337020	11000	297567	27.0515	4.75764	0.00013412	3.87251
ZFR	0	0	0	243620	364570	283060	11000	297083	27.0076	4.75529	0.0011286	2.94746
SFXN3	0	0	0	290510	313300	282150	11000	295320	26.8473	4.7467	5.88286e-06	5.23041
MAP2K2	0	0	0	267180	282510	331680	11000	293790	26.7082	4.73921	0.000112082	3.95046
PHB	0	0	0	248170	314050	312850	11000	291690	26.5173	4.72886	0.000179215	3.74663
AP2B1;AP1B1	0	0	0	298480	295000	269790	11000	287757	26.1597	4.70927	5.80421e-06	5.23626
MRPS26	0	0	0	276010	267220	318650	11000	287293	26.1176	4.70695	5.49174e-05	4.26029
NUP93	0	0	0	362110	315690	179970	11000	285923	25.993	4.70005	0.0063734	2.19563
NIFK	0	0	0	235420	340120	269260	11000	281600	25.6	4.67807	0.000798987	3.09746
DYNC1H1	0	0	0	237490	343130	260600	11000	280407	25.4915	4.67195	0.000942099	3.0259
NCL	497880	0	0	3154400	4886700	4611300	165960	4.21747e+06	25.4125	4.66747	0.0019692	2.70571
SRPK2	0	0	0	324200	297490	206300	11000	275997	25.0906	4.64908	0.00150608	2.82215
MRPS28	0	0	0	241930	228110	355480	11000	275173	25.0158	4.64477	0.00241723	2.61668
VRK3	0	0	0	286510	272760	263690	11000	274320	24.9382	4.64028	2.04373e-06	5.68958
UBN2	0	0	0	213640	319640	282760	11000	272013	24.7285	4.6281	0.00093794	3.02782
MRPS23	0	0	0	249600	323000	241410	11000	271337	24.667	4.62451	0.000472025	3.32604
QPCTL	0	0	0	292280	266630	252510	11000	270473	24.5885	4.61991	2.03316e-05	4.69183
TAF9;TAF9B	0	0	0	258130	290150	261840	11000	270040	24.5491	4.6176	1.16874e-05	4.93228
ARL6IP4	0	0	0	318210	281690	209040	11000	269647	24.5133	4.61549	0.00109711	2.95975
BCCIP	0	0	0	322690	268060	214950	11000	268567	24.4152	4.6097	0.000989187	3.00472
RRP12	0	0	0	162380	312420	317340	11000	264047	24.0042	4.58522	0.00655053	2.18372
FAM98A	0	0	0	219860	259300	310010	11000	263057	23.9142	4.5798	0.000544512	3.26399
AZU1	0	0	0	230680	348590	208490	11000	262587	23.8715	4.57722	0.00378957	2.42141
P4HA1	0	0	0	473740	312610	0	11000	262117	23.8288	4.57463	0.132542	0.877645
RPLP2	748370	926810	1685900	24807000	26740000	28436000	1120360	26661000	23.7968	4.5727	1.94523e-05	4.71103
NCOA5	0	0	0	289210	240780	245110	11000	258367	23.4879	4.55384	7.53539e-05	4.12289
MRPS15	0	0	0	242900	270500	260150	11000	257850	23.4409	4.55096	5.66304e-06	5.24695
LARP1	0	0	0	218180	246170	308460	11000	257603	23.4185	4.54958	0.000643767	3.19127
MRPS35	0	0	0	259360	292620	216770	11000	256250	23.2955	4.54198	0.000307874	3.51163
UBA52	0	0	0	0	248560	512560	11000	253707	23.0642	4.52759	0.161606	0.791543
PAK1IP1	0	0	0	316080	240090	203970	11000	253380	23.0345	4.52573	0.00155401	2.80855
FRG1	0	0	0	228800	259440	271290	11000	253177	23.0161	4.52457	3.68883e-05	4.43311
XRCC5	0	0	0	267920	238820	249300	11000	252013	22.9103	4.51792	7.73993e-06	5.11126
RBBP6	0	0	0	278480	242100	234560	11000	251713	22.883	4.51621	4.9557e-05	4.3049
ILF3	1080900	568500	744850	21094000	8205600	25212000	798083	1.81705e+07	22.7677	4.50892	0.0275284	1.56022
RBM4B	0	0	0	255220	258560	234730	11000	249503	22.6821	4.50348	4.73955e-06	5.32426
EXOSC3	0	0	0	267770	214420	257230	11000	246473	22.4067	4.48586	0.000111846	3.95138
NKTR	0	0	0	218250	255560	260900	11000	244903	22.2639	4.47664	5.29621e-05	4.27604
PEO1	0	0	0	261230	203810	269350	11000	244797	22.2542	4.47601	0.000288661	3.53961
MRPS7	0	0	0	270070	236430	227290	11000	244597	22.2361	4.47483	4.70897e-05	4.32707
XRN2	0	0	0	193410	273100	266840	11000	244450	22.2227	4.47396	0.000670181	3.17381
PPIH	0	0	0	302700	233140	196290	11000	244043	22.1858	4.47156	0.00144176	2.84111
EDC4	0	0	0	259760	256720	213190	11000	243223	22.1112	4.46671	8.55839e-05	4.06761
SSR4	0	0	0	244980	309800	174580	11000	243120	22.1018	4.46609	0.003388	2.47006
AP2A1	0	0	0	243260	243250	230290	11000	238933	21.7212	4.44103	6.40771e-07	6.1933
ERLIN2	0	0	0	286060	204450	224920	11000	238477	21.6797	4.43827	0.000625273	3.20393
RAB11FIP1	0	0	0	237430	223850	248070	11000	236450	21.4955	4.42596	4.60515e-06	5.33676
YWHAQ	0	0	0	246940	212230	244280	11000	234483	21.3167	4.41391	3.0253e-05	4.51923
LSM2	0	0	0	250450	217310	233710	11000	233823	21.2567	4.40984	1.66282e-05	4.77915
CYC1	0	0	0	228070	245240	227900	11000	233737	21.2488	4.40931	2.19145e-06	5.65927
SNRPG;SNRPGP15	0	608320	0	6004100	3323800	3495300	202773	4274400	21.0797	4.39778	0.0102105	1.99095
PAK2	0	0	0	171930	216790	302850	11000	230523	20.9567	4.38934	0.0038794	2.41124
PFN1	0	0	0	338270	0	345510	11000	227927	20.7206	4.37299	0.116161	0.934939
RBM12B	0	0	0	246280	221390	212520	11000	226730	20.6118	4.3654	2.33613e-05	4.6315
ZRANB2	0	0	0	218080	214800	236580	11000	223153	20.2867	4.34246	5.08079e-06	5.29407
BRI3BP	0	0	0	313420	187640	168050	11000	223037	20.2761	4.34171	0.00806045	2.09364
FLOT1	0	0	0	242270	229630	194980	11000	222293	20.2085	4.33689	9.55212e-05	4.0199
DNAJA3	0	0	0	197150	261050	204600	11000	220933	20.0848	4.32804	0.000394868	3.40355
MECP2	0	0	0	280860	378920	0	11000	219927	19.9933	4.32145	0.124828	0.903688
YME1L1	0	0	0	343580	314040	0	11000	219207	19.9279	4.31672	0.116918	0.932117
TFCP2	0	0	0	231490	213540	207190	11000	217407	19.7642	4.30482	7.47271e-06	5.12652
RPN2	0	0	0	249860	181680	215050	11000	215530	19.5936	4.29231	0.000395135	3.40325
PRPF3	0	0	0	211790	256720	177300	11000	215270	19.57	4.29057	0.000724828	3.13976
HACD3	0	0	0	182140	209130	246620	11000	212630	19.33	4.27277	0.00034086	3.46742
CAP1	0	0	0	202710	177830	247360	11000	209300	19.0273	4.25	0.000503081	3.29836
EIF3L	0	0	0	230340	200750	191430	11000	207507	18.8642	4.23758	5.99696e-05	4.22207
SEC61A1	0	0	0	269710	351990	0	11000	207233	18.8394	4.23568	0.123037	0.909966
XAB2	1124100	0	0	6377300	9926300	4724100	374700	7.00923e+06	18.7063	4.22545	0.0136975	1.86336
PIK3AP1	0	0	0	249060	159190	208400	11000	205550	18.6864	4.22391	0.00138132	2.85971
IKZF1	0	0	0	307570	302540	0	11000	203370	18.4882	4.20853	0.116144	0.935005
MRPS10	0	0	0	173960	251750	184120	11000	203277	18.4797	4.20787	0.00113677	2.94433
LSM3	0	0	0	128970	251060	223520	11000	201183	18.2894	4.19294	0.00553727	2.2567
ARHGEF2	0	0	0	216230	193390	191760	11000	200460	18.2236	4.18774	1.4317e-05	4.84415
CALM1	299490	0	0	1754000	1595800	2084500	99830	1.81143e+06	18.1452	4.18151	0.000615001	3.21112
CAPZB	0	0	338390	2718700	1662200	1712700	112797	2031200	18.0076	4.17054	0.00609404	2.21509
SRSF8	0	0	0	201710	392260	0	11000	197990	17.9991	4.16985	0.155335	0.808731
PTBP1	0	0	0	194920	197000	200560	11000	197493	17.9539	4.16623	2.89872e-08	7.53779
CHMP4B	0	0	0	218860	195660	177340	11000	197287	17.9352	4.16472	8.04929e-05	4.09424
DNM1L	0	0	0	189620	203540	196980	11000	196713	17.883	4.16052	1.04414e-06	5.98124
MSH6	0	0	0	220560	188950	179090	11000	196200	17.8364	4.15675	9.64833e-05	4.01555
SYF2	0	0	0	171520	244980	170850	11000	195783	17.7985	4.15368	0.00135004	2.86965
TBL2	0	0	0	207660	216590	156160	11000	193470	17.5882	4.13653	0.000506245	3.29564
DDX1	0	0	0	190670	180190	209010	11000	193290	17.5718	4.13519	2.13561e-05	4.67048
ESYT2	0	0	0	213920	213860	147370	11000	191717	17.4288	4.1234	0.000984163	3.00693
DDX6	0	0	0	175750	171610	225360	11000	190907	17.3552	4.11729	0.000380643	3.41948
CTBP1	0	0	0	231670	244980	95336	11000	190662	17.3329	4.11544	0.0163019	1.78776
RBM17	0	0	0	178980	223860	163370	11000	188737	17.1579	4.1008	0.000480969	3.31788
TOP2B	88772	131530	0	1241100	1547900	961590	73434	1.2502e+06	17.0248	4.08956	0.00247685	2.6061
SPI1	0	0	0	207480	174820	178410	11000	186903	16.9912	4.08672	5.50835e-05	4.25898
MRPS11	0	0	0	154440	177790	224920	11000	185717	16.8833	4.07753	0.000858549	3.06623
HSPA8	1202000	206880	233390	9070900	9137200	9503000	547423	9.23703e+06	16.8737	4.0767	1.63215e-05	4.78724
GNB2L1	0	0	0	175150	178900	202420	11000	185490	16.8627	4.07577	2.65072e-05	4.57664
RUNX2	0	0	0	232570	323270	0	11000	185280	16.8436	4.07413	0.126598	0.897572
XRCC1	0	0	0	193960	261640	96951	11000	184184	16.744	4.06557	0.0182428	1.73891
APOBEC3C	0	0	0	191900	217590	141500	11000	183663	16.6967	4.06149	0.00119488	2.92268
HMHA1	0	0	0	232140	139190	173830	11000	181720	16.52	4.04614	0.00258145	2.58814
HSP90AB2P	0	0	0	174380	168520	195720	11000	179540	16.3218	4.02873	2.65681e-05	4.57564
FUS	0	0	0	0	303680	222980	11000	175553	15.9594	3.99633	0.125371	0.901803
ZNF766;ZNF765;ZNF789;ZNF30;ZNF695;ZNF195;ZNF56;ZNF333;ZNF679;ZNF506;ZNF735;ZNF610;ZNF713;ZNF486;ZNF701;ZNF141;ZNF718;ZNF716;ZNF253;ZNF888;ZNF320;ZNF286A;ZNF468;ZNF479;ZNF257;ZNF480;ZNF519;ZNF891;ZNF92;ZNF66;ZNF527;ZNF677;ZNF732;ZNF90;ZNF354A;ZNF354B;ZNF813;ZNF528;ZNF595;ZNF534;ZNF573;ZNF761;ZNF28;ZNF616;ZNF347;ZNF624;ZNF845;ZNF445;ZNF729	0	0	0	159460	180940	185490	11000	175297	15.9361	3.99422	2.60089e-05	4.58488
GNL3	0	0	0	148250	220150	156250	11000	174883	15.8985	3.99082	0.00154053	2.81233
NIP7	0	0	0	212100	168480	143710	11000	174763	15.8876	3.98983	0.000943439	3.02529
SKP1	0	0	0	256760	265540	0	11000	174100	15.8273	3.98434	0.116229	0.934686
HSPA5	259820	0	0	1348500	1273000	1476800	86606.7	1366100	15.7736	3.97944	0.000260982	3.58339
AIFM1	0	0	0	252190	260060	0	11000	170750	15.5227	3.95631	0.11621	0.934755
KIAA1429	916700	1043800	3401000	31559000	25713000	25720000	1.78717e+06	27664000	15.4793	3.95226	0.000253112	3.59669
PCBP2;PCBP3	234580	0	0	1402100	1208800	983280	78193.3	1198060	15.3218	3.93751	0.00147738	2.83051
RBM39	261850	367710	382200	4943700	5088700	5330000	337253	5120800	15.1838	3.92446	2.2792e-06	5.64222
H2AFY	0	0	0	163490	177350	148250	11000	163030	14.8209	3.88956	4.16186e-05	4.38071
NKRF	0	0	0	149740	154330	182530	11000	162200	14.7455	3.8822	9.32256e-05	4.03046
LSM4	0	0	0	0	280780	203030	11000	161270	14.6609	3.8739	0.126286	0.898644
TADA3	0	0	0	0	256230	226300	11000	160843	14.6221	3.87008	0.117645	0.929428
HSP90B1	0	0	0	260780	0	221640	11000	160807	14.6188	3.86975	0.118728	0.925446
TUBA1C	0	0	0	178650	136530	166360	11000	160513	14.5921	3.86712	0.000212391	3.67286
XPO1	0	0	0	158560	166350	154990	11000	159967	14.5424	3.8622	1.15605e-06	5.93703
C12orf43	0	0	0	155740	200880	123260	11000	159960	14.5418	3.86214	0.00207042	2.68394
CPSF1	0	0	0	191870	109740	178190	11000	159933	14.5394	3.8619	0.00325359	2.48764
UBE2M	0	0	0	206790	0	271130	11000	159307	14.4824	3.85623	0.123275	0.909124
THEM6	0	0	0	170540	143780	163480	11000	159267	14.4788	3.85587	3.76929e-05	4.42374
KHDRBS1	0	196670	0	803080	911990	1104000	65556.7	939690	14.334	3.84137	0.00134429	2.87151
STXBP2	0	0	0	139940	174920	155730	11000	156863	14.2603	3.83393	0.000100872	3.99623
CLIC1	0	0	0	188700	185040	94433	11000	156058	14.1871	3.8265	0.00717146	2.14439
DARS	0	0	0	133370	143480	185930	11000	154260	14.0236	3.80979	0.000663317	3.17828
ATP5O	0	0	0	167720	132200	152900	11000	150940	13.7218	3.7784	0.000126182	3.899
ACTA1;ACTC1;ACTG2;ACTA2	0	474940	453280	3833200	3299700	5403900	309407	4.17893e+06	13.5063	3.75556	0.00400136	2.39779
HCLS1	0	0	0	150820	0	287210	11000	146010	13.2736	3.73049	0.15316	0.814855
MRPS31	0	0	0	141960	152420	142560	11000	145647	13.2406	3.7269	1.75687e-06	5.75526
GNL2	0	0	0	131660	125910	179160	11000	145577	13.2342	3.7262	0.000992376	3.00332
SMNDC1	0	0	0	158020	121540	156610	11000	145390	13.2173	3.72435	0.000260378	3.5844
DNTTIP1	0	0	0	147800	151190	129040	11000	142677	12.9706	3.69717	3.20956e-05	4.49356
NOSIP	0	0	0	148320	138960	139250	11000	142177	12.9252	3.69211	1.30505e-06	5.88437
SAMHD1	0	0	0	145620	143450	137260	11000	142110	12.9191	3.69143	5.77709e-07	6.23829
STAU1	0	0	0	154170	111590	152780	11000	139513	12.683	3.66483	0.000564518	3.24832
MRPL11	0	0	0	155300	114370	147200	11000	138957	12.6324	3.65906	0.000374161	3.42694
ZNF638	0	0	0	137070	135820	137510	11000	136800	12.4364	3.63649	1.1247e-09	8.94896
PRPF38B	0	0	0	139990	117240	145660	11000	134297	12.2088	3.60985	0.000102037	3.99124
C17orf85	0	0	0	165940	234870	0	11000	133603	12.1458	3.60238	0.127746	0.893654
HNRNPH3	0	0	0	140460	116620	138910	11000	131997	11.9997	3.58493	6.79787e-05	4.16763
CAND1	0	0	0	112980	140380	142490	11000	131950	11.9955	3.58442	0.000156086	3.80664
GNAI2	0	0	0	145290	109390	141100	11000	131927	11.9933	3.58416	0.000311273	3.50686
RRP1B	0	0	0	126440	138240	125900	11000	130193	11.8358	3.56508	5.45355e-06	5.26332
RANGAP1	0	0	0	141950	131290	115990	11000	129743	11.7948	3.56008	6.67065e-05	4.17583
CLK4;CLK1	0	0	0	111250	120980	155920	11000	129383	11.7621	3.55608	0.000674247	3.17118
EPRS	0	0	0	265190	119240	0	11000	128143	11.6494	3.54218	0.170026	0.769484
CALR	0	0	0	288990	94701	0	11000	127897	11.627	3.53941	0.207112	0.683794
HNRNPUL1	415260	0	0	1379600	1482300	1961400	138420	1.60777e+06	11.6151	3.53793	0.00291135	2.53591
CDK6	0	0	0	125990	110500	140410	11000	125633	11.4212	3.51364	0.000129851	3.88655
DDX31	0	0	0	137130	106330	131620	11000	125027	11.3661	3.50666	0.000191158	3.71861
KPNA1;KPNA5	0	0	0	0	195280	175790	11000	123690	11.2445	3.49115	0.117213	0.931025
UQCRQ	0	0	0	106160	96519	165210	11000	122630	11.1482	3.47873	0.00464809	2.33273
THAP11	0	0	0	109830	118250	138130	11000	122070	11.0973	3.47213	0.000129769	3.88683
RPL7L1	0	0	0	133970	119850	108700	11000	120840	10.9855	3.45752	7.8493e-05	4.10517
MT-CO2	0	0	0	138400	113750	108050	11000	120067	10.9152	3.44826	0.000208752	3.68037
TUBA1B	1593800	1104600	1164200	14801000	13238000	13647000	1.28753e+06	1.38953e+07	10.7922	3.43192	1.3851e-05	4.85852
CMSS1	0	0	0	220370	0	129930	11000	116767	10.6152	3.40805	0.141924	0.847946
RAC2;RAC1;RAC3	0	0	0	117710	115260	116290	11000	116420	10.5836	3.40376	8.30885e-09	8.08046
SRBD1	0	0	0	114960	129180	103920	11000	116020	10.5473	3.3988	9.2163e-05	4.03544
MRPL38	0	0	0	108990	118000	118080	11000	115023	10.4567	3.38635	2.82604e-06	5.54882
DDX41	608390	0	233430	2513500	3682800	2436700	280607	2.87767e+06	10.2552	3.35828	0.00413645	2.38337
KEAP1	0	0	0	116080	105310	115800	11000	112397	10.2179	3.35302	5.89337e-06	5.22964
ACTB	9786300	9233400	13534000	103720000	106100000	122110000	1.08512e+07	1.10643e+08	10.1964	3.34999	7.30978e-05	4.1361
MNDA	0	0	0	83572	145020	107790	11000	112127	10.1934	3.34956	0.00329364	2.48232
UMPS	0	0	0	148030	89658	95363	11000	111017	10.0925	3.33521	0.00394191	2.40429
TRMT10C	0	0	0	100560	117240	112980	11000	110260	10.0236	3.32533	2.50974e-05	4.60037
UTP23	0	0	0	0	167780	161460	11000	109747	9.97697	3.3186	0.116263	0.934558
NUP205	0	0	0	145580	182470	0	11000	109350	9.94091	3.31338	0.121122	0.916777
TRMT1L	0	0	0	107230	121150	98549	11000	108976	9.90694	3.30844	7.7965e-05	4.1081
ARF4	0	0	0	170210	155440	0	11000	108550	9.86818	3.30278	0.116934	0.932059
AIP	0	0	0	147920	71289	106000	11000	108403	9.85482	3.30083	0.00808375	2.09239
PRSS57	0	0	0	163300	0	160130	11000	107810	9.80091	3.29292	0.116155	0.934963
PFKL	0	0	0	87829	106050	126630	11000	106836	9.71239	3.27983	0.000676307	3.16986
HNRNPA3	0	0	801160	2561000	3553600	1490500	267053	2.53503e+06	9.49261	3.2468	0.0254887	1.59365
NUP35	0	0	0	96646	93493	120350	11000	103496	9.40876	3.234	0.000258232	3.58799
HSD17B11	0	0	0	101610	111930	96925	11000	103488	9.40803	3.23389	1.99424e-05	4.70022
SNX2	0	0	0	133560	85077	86301	11000	101646	9.24055	3.20798	0.00311748	2.5062
SURF4	0	0	0	0	135540	166050	11000	100530	9.13909	3.19205	0.120171	0.920199
DPM1	0	169720	0	499850	522300	523900	56573.3	515350	9.10942	3.18736	0.00130264	2.88518
CBFB	0	0	0	153870	0	145810	11000	99893.3	9.08121	3.18288	0.116404	0.934031
SUPT7L	0	0	0	91086	207670	0	11000	99585.3	9.05321	3.17843	0.172859	0.762308
CPSF4	0	0	0	0	153780	144760	11000	99513.3	9.04667	3.17739	0.116479	0.933751
MRPS33	0	0	0	90569	107840	94799	11000	97736	8.88509	3.15139	4.70934e-05	4.32704
PELP1	0	0	0	123790	85840	83322	11000	97650.7	8.87733	3.15013	0.00172535	2.76312
LRRC59	0	0	0	114180	89135	84776	11000	96030.3	8.73003	3.12599	0.000468285	3.32949
TRAM1	0	0	0	98488	126340	58100	11000	94309.3	8.57358	3.0999	0.00890016	2.0506
MED23	0	0	0	0	140880	137620	11000	92833.3	8.43939	3.07714	0.116171	0.934902
ARF1;ARF3	0	0	0	122690	0	153170	11000	91953.3	8.35939	3.0634	0.12095	0.917395
PYCR2	0	0	0	139960	135440	0	11000	91800	8.34545	3.06099	0.116224	0.934705
TAF4	0	0	0	89953	96855	88132	11000	91646.7	8.33152	3.05858	4.21329e-06	5.37538
DHX35	0	0	0	0	140060	133470	11000	91176.7	8.28879	3.05116	0.116347	0.934244
HNRNPL	259610	0	0	608890	661720	856860	86536.7	709157	8.19487	3.03472	0.00560101	2.25173
SLC25A10	0	0	203570	521700	488400	652150	67856.7	554083	8.1655	3.02954	0.00447857	2.34886
ARHGEF6	0	0	0	116420	43336	107410	11000	89055.3	8.09594	3.0172	0.0179818	1.74517
TOMM22	0	0	0	159640	0	107390	11000	89010	8.09182	3.01646	0.131117	0.882339
CREB1	0	0	0	89417	85183	90386	11000	88328.7	8.02988	3.00538	6.40585e-07	6.19342
PPP1CC	0	0	0	117950	0	146240	11000	88063.3	8.00576	3.00104	0.120657	0.918446
YKT6	0	0	0	0	130730	130030	11000	86920	7.90182	2.98218	0.116119	0.935095
TUBA4A	0	0	0	161010	0	99477	11000	86829	7.89355	2.98067	0.137821	0.860685
NKAP;NKAPL	0	0	0	108650	148880	0	11000	85843.3	7.80394	2.9642	0.125731	0.900556
SLC25A22	0	0	0	84611	86948	85785	11000	85781.3	7.7983	2.96316	2.29446e-08	7.63932
NUDT21	0	0	0	125070	130360	0	11000	85143.3	7.7403	2.95239	0.116287	0.934468
GMFG	0	0	0	139750	115630	0	11000	85126.7	7.73879	2.95211	0.119653	0.922078
NUP62	0	0	0	131130	122780	0	11000	84636.7	7.69424	2.94378	0.116546	0.933501
LGALS9	0	0	0	127980	0	124470	11000	84150	7.65	2.93546	0.116193	0.934819
TAF6	0	0	0	71052	104270	76617	11000	83979.7	7.63452	2.93254	0.00121867	2.91412
CD3EAP	0	0	0	92650	159020	0	11000	83890	7.62636	2.931	0.143009	0.844635
IMMT	0	0	0	70928	81554	98826	11000	83769.3	7.61539	2.92892	0.000500302	3.30077
CHAMP1	0	0	0	74062	91546	80982	11000	82196.7	7.47242	2.90158	8.55909e-05	4.06757
HNRNPA2B1	1212500	1420600	1902500	8642000	12430000	12652000	1.51187e+06	1.12413e+07	7.4354	2.89441	0.00179105	2.74689
EXOSC8	0	0	0	139530	0	101880	11000	80470	7.31545	2.87095	0.1257	0.900664
TRRAP	95410	0	0	219200	264620	213840	31803.3	232553	7.31223	2.87031	0.0048928	2.31044
MED16	0	0	0	83076	81432	75440	11000	79982.7	7.27115	2.86218	4.22644e-06	5.37403
HIST1H2AJ;HIST1H2AH;H2AFJ;HIST2H2AC;HIST1H2AC;HIST2H2AA3;HIST1H2AG;HIST3H2A;HIST1H2AD;HIST1H2AB;HIST1H2AA;H2AFX	2017600	1721600	0	11189000	8157700	7833600	1246400	9060100	7.26901	2.86176	0.00324145	2.48926
SLC25A1	124570	163100	122130	1079900	978070	915100	136600	991023	7.25493	2.85896	6.77682e-05	4.16897
ATF2	0	0	0	74311	81490	83157	11000	79652.7	7.24115	2.85622	8.02293e-06	5.09567
HNRNPA0	134300	172140	217640	1278800	1310800	1163300	174693	1.25097e+06	7.16093	2.84015	2.94887e-05	4.53034
TMCO1	0	0	0	135800	100370	0	11000	78723.3	7.15667	2.83929	0.124991	0.903123
DDX19B;DDX19A	0	0	0	117330	113590	0	11000	76973.3	6.99758	2.80686	0.116221	0.934716
EXOSC9	0	0	0	78369	81460	69998	11000	76609	6.96445	2.80001	2.36218e-05	4.62669
SLC25A3	264000	368330	423950	2614300	1958600	2727600	352093	2433500	6.91152	2.789	0.00104015	2.9829
RARS	0	0	0	117950	0	108280	11000	75410	6.85545	2.77725	0.116843	0.932398
PTPN7	0	0	0	0	63992	152190	11000	72060.7	6.55097	2.71171	0.177733	0.750232
EWSR1	0	0	0	87737	122340	0	11000	70025.7	6.36597	2.67038	0.126795	0.896899
ELAVL1	0	0	0	107600	0	100800	11000	69466.7	6.31515	2.65882	0.11654	0.933526
FKBP15	0	0	0	60432	65014	78195	11000	67880.3	6.17094	2.62549	0.000218074	3.6614
KPNA2	0	0	0	74277	58844	69360	11000	67493.7	6.13579	2.61725	0.000120442	3.91922
RFX1	0	0	0	0	123480	78921	11000	67467	6.13336	2.61668	0.135026	0.869582
USO1	0	0	0	99146	102540	0	11000	67228.7	6.1117	2.61157	0.116229	0.934685
COPG1	0	0	0	81174	52750	66817	11000	66913.7	6.08306	2.6048	0.00123075	2.90983
CAD	0	0	0	77320	63541	54889	11000	65250	5.93182	2.56847	0.000564144	3.24861
TIMM44	0	0	0	72582	67706	55336	11000	65208	5.928	2.56755	0.00022112	3.65537
DHRS7B	0	0	0	65872	91836	36858	11000	64855.3	5.89594	2.55972	0.0150444	1.82262
GRWD1	0	0	0	80190	53925	55897	11000	63337.3	5.75794	2.52555	0.0016913	2.77178
ZC3H4	0	0	0	83933	105560	0	11000	63164.3	5.74221	2.52161	0.121272	0.91624
TXNL4A	0	0	0	91194	98259	0	11000	63151	5.741	2.5213	0.116669	0.933043
ATP5J2	0	57732	0	126370	107980	94553	19244	109634	5.69707	2.51022	0.013308	1.87589
TPM3	0	0	640280	1455400	1087800	1047500	213427	1196900	5.60802	2.48749	0.0169983	1.76959
TMOD3	0	0	0	70151	57869	55367	11000	61129	5.55718	2.47435	0.000180401	3.74376
PAG1	0	0	0	98481	0	81234	11000	59905	5.44591	2.44517	0.119767	0.921663
IDH2	0	0	0	113800	65826	0	11000	59875.3	5.44321	2.44446	0.143678	0.842611
MAP2K1	0	0	0	95673	0	80203	11000	58625.3	5.32958	2.41402	0.119185	0.923779
COPB1	0	0	0	84296	0	88322	11000	57539.3	5.23085	2.38704	0.116333	0.934298
SMARCC2	0	0	0	72430	46502	52125	11000	57019	5.18355	2.37394	0.0019306	2.71431
P4HB	59424	65115	62995	335070	301500	315910	62511.3	317493	5.07897	2.34454	1.33041e-05	4.87602
AIMP2	0	0	0	0	71899	94103	11000	55334	5.03036	2.33066	0.123184	0.909446
HIST1H2BH;HIST2H2BF;HIST1H2BL;HIST1H2BM;HIST1H2BN;HIST1H2BC;HIST1H2BD;HIST1H2BK;H2BFS	7349000	6863700	5964500	36619000	42050000	22750000	6.72573e+06	3.38063e+07	5.02642	2.32953	0.00930079	2.03148
SLC25A6;SLC25A4	163180	182000	248060	1061800	908300	1002100	197747	990733	5.01011	2.32484	0.000104261	3.98188
GAR1	125350	226720	210900	1073100	930670	802240	187657	935337	4.9843	2.31739	0.000893597	3.04886
IPO4	0	0	0	50646	52548	61198	11000	54797.3	4.98158	2.3166	7.22758e-05	4.14101
GIT2	0	0	0	36880	34937	91709	11000	54508.7	4.95533	2.30898	0.0428473	1.36808
CDK13	0	0	0	0	79329	83524	11000	54284.3	4.93494	2.30303	0.11638	0.93412
ADAR	0	0	0	66616	0	95765	11000	54127	4.92064	2.29884	0.128773	0.890175
KDM1A	0	0	0	37780	89745	34555	11000	54026.7	4.91152	2.29617	0.0391229	1.40757
SATB2	0	0	0	0	92288	69366	11000	53884.7	4.89861	2.29237	0.124052	0.906396
EEF1A1;EEF1A1P5	1176100	714330	925800	5781300	3967500	4026200	938743	4.59167e+06	4.89129	2.29022	0.00390642	2.40822
YARS	0	0	0	73068	88079	0	11000	53715.7	4.88324	2.28784	0.119556	0.922427
ZEB2	0	0	0	95826	63270	0	11000	53032	4.82109	2.26936	0.132499	0.877789
TOP2A	0	0	0	0	73613	85299	11000	52970.7	4.81552	2.26769	0.118263	0.927151
HNRNPA1;HNRNPA1L2	0	0	654740	990970	941010	1204200	218247	1.04539e+06	4.78996	2.26001	0.023698	1.62529
ZC3HAV1	0	0	0	83138	0	72650	11000	51929.3	4.72085	2.23905	0.117916	0.928427
COIL	0	0	0	57585	49681	47989	11000	51751.7	4.7047	2.2341	6.26079e-05	4.20337
FMR1	0	0	0	0	0	154910	11000	51636.7	4.69424	2.23089	0.373901	0.427243
EHD1	0	0	0	84724	68975	0	11000	51233	4.65755	2.21957	0.120276	0.919821
RCOR1	0	0	0	81593	0	71621	11000	51071.3	4.64285	2.21501	0.117799	0.928859
VIM	4282500	906550	911040	11364000	9736300	7214600	2.03336e+06	9438300	4.64172	2.21466	0.010918	1.96186
EIF3E	0	0	0	70019	82808	0	11000	50942.3	4.63112	2.21136	0.118895	0.924838
DDOST	0	0	0	80819	71024	0	11000	50614.3	4.6013	2.20204	0.117769	0.928969
PSMD5	0	0	0	51909	54795	45112	11000	50605.3	4.60048	2.20179	6.07827e-05	4.21622
MRPS5	0	0	0	83527	68208	0	11000	50578.3	4.59803	2.20102	0.120155	0.920258
EXOSC7	0	0	0	72129	78412	0	11000	50180.3	4.56185	2.18962	0.116809	0.932524
CHERP	0	0	0	0	101990	48448	11000	50146	4.55873	2.18863	0.163873	0.785493
TEX10	0	0	0	54373	49183	46276	11000	49944	4.54036	2.18281	2.98805e-05	4.52461
STAU2	0	0	0	77547	71523	0	11000	49690	4.51727	2.17545	0.116766	0.932685
HIST1H1B	1388400	2670700	5235400	16549000	12033000	12994000	3.09817e+06	1.38587e+07	4.47318	2.1613	0.00377051	2.4236
ATP5C1	0	0	303670	523170	497400	321730	101223	447433	4.42026	2.14413	0.0441161	1.3554
DLAT	0	0	0	84683	0	57969	11000	47550.7	4.32279	2.11196	0.129875	0.886476
G3BP1	0	0	0	46947	40733	54621	11000	47433.7	4.31215	2.10841	0.000294249	3.53128
ACTR1A	0	0	0	86110	0	56011	11000	47373.7	4.3067	2.10658	0.133642	0.874056
ABCD3	0	0	0	77094	0	64731	11000	47275	4.29773	2.10357	0.11913	0.923978
HIST1H4A	2735900	1551900	1754200	6593000	9525400	9660600	2014000	8593000	4.26663	2.0931	0.00349388	2.45669
IARS	0	0	0	41695	50374	47041	11000	46370	4.21545	2.07569	5.19519e-05	4.2844
CWC25	0	0	0	63110	72741	0	11000	45283.7	4.1167	2.04149	0.118112	0.927707
IQGAP2	0	0	0	53109	40669	41809	11000	45195.7	4.1087	2.03868	0.000339665	3.46895
EEF1E1	0	0	0	77092	0	57202	11000	44764.7	4.06952	2.02486	0.124768	0.903897
LSM5	0	0	0	63238	70494	0	11000	44577.3	4.05248	2.01881	0.117286	0.930753
HSPD1	0	819900	324630	1773900	1406500	1454600	381510	1545000	4.0497	2.01781	0.0117477	1.93005
ARHGEF7	0	0	0	55427	38133	38269	11000	43943	3.99482	1.99813	0.00156674	2.805
RAVER1	0	0	0	48769	40756	40257	11000	43260.7	3.93279	1.97555	9.64796e-05	4.01556
ESYT1	0	0	0	42774	33318	52992	11000	43028	3.91164	1.96777	0.00162905	2.78807
DDX39A	0	0	0	0	0	126770	11000	42256.7	3.84152	1.94168	0.373901	0.427243
HIST1H1C	3075500	6846200	10081000	33329000	23185000	19538000	6.66757e+06	2.53507e+07	3.80209	1.92679	0.0152803	1.81587
VAT1	0	0	0	0	0	123930	11000	41310	3.75545	1.90899	0.373901	0.427243
MED24	0	0	0	42540	39571	40209	11000	40773.3	3.70667	1.89012	1.43446e-06	5.84331
HIRA	0	0	0	56474	65550	0	11000	40674.7	3.6977	1.88663	0.118312	0.92697
PGK1	0	0	0	37165	44136	39084	11000	40128.3	3.64803	1.86712	4.24649e-05	4.37197
IMMT	376740	985290	1425300	3804200	3071600	3055800	929110	3.31053e+06	3.56312	1.83314	0.00369594	2.43227
SSR1	0	0	296200	322580	455160	277210	98733.3	351650	3.56161	1.83253	0.087325	1.05886
FLNA	368480	0	0	537990	239230	499080	122827	425433	3.46369	1.79231	0.121806	0.914332
SUPT3H	0	0	0	66387	46985	0	11000	37790.7	3.43552	1.78053	0.127633	0.894036
ITGAL	0	0	0	0	58924	52486	11000	37136.7	3.37606	1.75534	0.117443	0.930173
HCFC1	0	0	0	32984	37814	39165	11000	36654.3	3.33221	1.73648	4.04736e-05	4.39283
SLC25A5	3592500	5272900	7262200	18381000	17209000	17558000	5.37587e+06	17716000	3.29547	1.72048	0.00038045	3.4197
MED27	0	0	0	38728	68260	0	11000	35662.7	3.24206	1.69691	0.145495	0.837152
PDIA3	0	0	0	41910	0	59990	11000	33966.7	3.08788	1.62662	0.128485	0.891147
IMPDH2	0	0	127790	164330	225180	0	42596.7	129837	3.04805	1.60789	0.334687	0.475361
SSRP1	0	0	0	0	46460	52756	11000	33072	3.00655	1.58811	0.117716	0.929165
SERBP1	0	0	355260	258210	404540	370410	118420	344387	2.90818	1.54012	0.148346	0.828725
EXOSC2	0	0	0	0	0	94786	11000	31595.3	2.8723	1.52221	0.373901	0.427243
RPN1	0	0	222600	81282	301320	220350	74200	200984	2.70868	1.43759	0.266046	0.575043
TUFM	235460	0	0	207240	230430	179910	78486.7	205860	2.62287	1.39114	0.185833	0.730878
ACSL1	0	0	0	42801	0	42598	11000	28466.3	2.58785	1.37175	0.116119	0.935098
EIF3G	0	0	0	83251	0	0	11000	27750.3	2.52276	1.335	0.373901	0.427243
RPS27	398370	572950	1108100	2097900	1540000	1602800	693140	1746900	2.52027	1.33358	0.01903	1.72056
CNOT1	0	0	0	28010	22219	29110	11000	26446.3	2.40421	1.26556	0.000245213	3.61046
RBM42	0	0	0	0	0	71279	11000	23759.7	2.15997	1.11101	0.373901	0.427243
PRKRA	0	0	0	32143	0	37811	11000	23318	2.11982	1.08394	0.118721	0.925472
ENO1	72933	0	0	46136	49166	54397	24311	49899.7	2.05256	1.03742	0.354026	0.450965
EIF3A	0	0	0	0	32280	32660	11000	21646.7	1.96788	0.976641	0.11613	0.935055
PKM	609520	0	0	340380	354120	456970	203173	383823	1.88914	0.917731	0.431009	0.365513
LMNB1	478710	876380	1700600	1903800	1808200	1585200	1.01856e+06	1.76573e+06	1.73355	0.793732	0.11499	0.939338
CHCHD3	1837900	3499300	1651200	5039800	3621300	3364500	2.32947e+06	4.00853e+06	1.72079	0.783075	0.099241	1.00331
HSPA9	868000	1119900	798770	1596000	1526000	1534800	928890	1.55227e+06	1.6711	0.740797	0.0033768	2.4715
CPSF2	0	0	0	0	0	53684	11000	17894.7	1.62679	0.702026	0.373901	0.427243
EEF2	1054800	322350	0	786370	756970	685870	459050	743070	1.61871	0.694847	0.416184	0.380714
SUPT20H	0	0	0	24613	15221	11809	11000	17214.3	1.56494	0.646107	0.0108499	1.96457
GPATCH1	0	0	0	17593	16704	16975	11000	17090.7	1.5537	0.635705	3.36281e-07	6.4733
ATP5B	0	455490	0	282260	202690	209980	151830	231643	1.52568	0.609448	0.631489	0.199634
ELP3	0	0	0	26617	21916	0	11000	16177.7	1.4707	0.5565	0.119835	0.921416
PIP	943990	1179200	568450	242240	219130	2383500	897213	948290	1.05693	0.0798773	0.948239	0.0230823
H2AFV;H2AFZ	0	937500	1238100	751840	696840	637710	725200	695463	0.958995	-0.0604045	0.940492	0.0266447
ARGLU1	519870	418270	1185700	702510	719100	605320	707947	675643	0.95437	-0.0673788	0.900774	0.0453841
MTA2	2762900	0	0	678550	916800	651480	920967	748943	0.813214	-0.298292	0.86149	0.0647496
RPS27A;UBB;UBC	3151500	5020300	5502100	3808500	3387200	3228100	4.55797e+06	3474600	0.762314	-0.391543	0.215754	0.666041
S100A8	0	0	1793800	705970	654080	0	597933	453350	0.758195	-0.399359	0.83225	0.0797463
FCGR1A;FCGR1B;FCGR1C	57562000	61019000	81580000	50147000	39125000	59619000	6.67203e+07	4.96303e+07	0.743856	-0.426904	0.148138	0.829333
PRKDC	2539300	3346700	4195000	1919600	2237000	2681800	3.36033e+06	2.27947e+06	0.678345	-0.559908	0.109396	0.960997
RFC4	0	5273600	0	1184600	924500	949030	1.75787e+06	1.01938e+06	0.579894	-0.786138	0.696307	0.157199
AZGP1	1320400	2074200	1390800	315280	166750	2201200	1.59513e+06	894410	0.560712	-0.834669	0.371942	0.429525
LMNA	300960	0	121650	122400	0	110470	140870	77623.3	0.551028	-0.859802	0.544812	0.263753
ATP5A1	645880	670060	1236600	387300	466630	415860	850847	423263	0.497461	-1.00734	0.0926948	1.03294
LGALS7	37516	46063	0	0	0	0	27859.7	11000	0.394836	-1.34067	0.12026	0.919881
TMPO	546440	881080	1051600	339000	283960	332420	826373	318460	0.385371	-1.37568	0.0272748	1.56424
VDAC2	239190	0	547030	74876	101990	111850	262073	96238.7	0.36722	-1.44528	0.355067	0.44969
MINA	832690	0	1155900	292730	297140	123790	662863	237887	0.358877	-1.47844	0.29027	0.537198
BLMH	687790	760290	0	0	235500	270400	482693	168633	0.349359	-1.51722	0.288309	0.540142
CAT	1066100	1124800	0	562230	0	0	730300	187410	0.256621	-1.96229	0.256824	0.590365
S100A7;S100A7A	1526900	1789100	2440500	405840	480120	315520	1.91883e+06	400493	0.208717	-2.26038	0.00530517	2.2753
CSTA	748360	2644200	2153700	225360	262300	641980	1.84875e+06	376547	0.203676	-2.29565	0.0651493	1.18609
GAPDH	4705300	3976300	2989500	918260	691710	731720	3.89037e+06	780563	0.20064	-2.31732	0.00345355	2.46173
AHNAK	305440	0	366340	106840	0	0	223927	35613.3	0.15904	-2.65254	0.188113	0.72558
ANXA2;ANXA2P2	2618000	2381200	1861300	272180	467740	315690	2.28683e+06	351870	0.153868	-2.70024	0.00111485	2.95278
VCL	473480	0	286130	114310	0	0	253203	38103.3	0.150485	-2.73231	0.206574	0.684924
AMY1A;AMY2B;AMY2A	1949700	0	2169700	591210	0	0	1.37313e+06	197070	0.143518	-2.80069	0.176347	0.753632
IGHG1	449570000	606140000	865830000	108060000	106360000	47053000	6.40513e+08	8.71577e+07	0.136075	-2.87753	0.0108423	1.96488
PRDX2	613440	720860	534160	0	172320	77083	622820	83134.3	0.133481	-2.9053	0.00183693	2.73591
S100A9	5797200	10559000	10234000	1231100	1135100	931810	8863400	1.09934e+06	0.124031	-3.01123	0.0072488	2.13973
SERPINB3	576890	766710	462490	57543	73813	69031	602030	66795.7	0.110951	-3.17201	0.00382561	2.4173
SERPINB12	3046800	2005000	1762200	0	230570	494560	2.27133e+06	241710	0.106418	-3.23219	0.00838451	2.07652
KRT2	397590000	347410000	274170000	18262000	25276000	46062000	3.39723e+08	2.98667e+07	0.0879147	-3.50775	0.0010886	2.96313
ARG1	635740	604470	972300	0	0	187860	737503	62620	0.0849081	-3.55795	0.00717762	2.14402
DSG1	11727000	11089000	7035200	532090	810110	1122500	9950400	821567	0.0825662	-3.5983	0.00349948	2.456
SBSN	2468400	1617200	0	134530	176950	0	1.36187e+06	103827	0.0762385	-3.71334	0.158101	0.801064
DLST	112640	177320	162440	0	0	0	150800	11000	0.0729443	-3.77706	0.00152268	2.81739
KRT1	1191300000	380140000	577700000	34071000	47733000	71257000	716380000	5.10203e+07	0.0712197	-3.81158	0.0528873	1.27665
KPRP	22102000	19887000	10175000	788940	1024500	1580400	17388000	1131280	0.065061	-3.94206	0.011428	1.94203
DSC1	3185400	4188700	3410700	286450	0	396750	3.59493e+06	227733	0.0633484	-3.98055	0.000496436	3.30414
DSP	18583000	14898000	12310000	446960	789680	1457900	1.52637e+07	898180	0.0588443	-4.08695	0.00146471	2.83425
GRN	8040800	31184000	55868000	1849800	1917000	973940	31697600	1.58025e+06	0.0498538	-4.32615	0.0946936	1.02368
FABP5	1060600	688680	0	0	76564	0	583093	25521.3	0.0437689	-4.51395	0.148189	0.829184
JUP	9233500	8450300	4262200	290550	150630	404160	7.31533e+06	281780	0.0385191	-4.69828	0.0103972	1.98308
LCN1;LCN1P1	0	487820	452950	0	0	0	313590	11000	0.0350776	-4.8333	0.116663	0.933068
CASP14	1572900	1048300	2188600	0	80437	84729	1.60327e+06	55055.3	0.0343395	-4.86399	0.00943399	2.0253
TFRC	207390	399960	473440	0	0	0	360263	11000	0.0305332	-5.03348	0.0104844	1.97946
PKP1	1406300	513790	0	0	0	0	640030	11000	0.0171867	-5.86256	0.194266	0.711602
KRTAP16-1	591710	1585000	0	0	0	0	725570	11000	0.0151605	-6.04354	0.191712	0.717351
A2M	649210	838360	1038300	0	0	0	841957	11000	0.0130648	-6.25817	0.00169509	2.77081
CTSD	872050	1044300	842830	0	0	0	919727	11000	0.0119601	-6.38563	0.000126905	3.89652
VDAC3	676120	673220	1485200	0	0	0	944847	11000	0.0116421	-6.4245	0.024961	1.60274
PRDX1	1318300	743390	1036700	0	0	0	1.0328e+06	11000	0.0106507	-6.55291	0.00339582	2.46905
KRTAP10-1;KRTAP10-5;KRTAP10-7	1580300	6282800	0	0	0	0	2.62103e+06	11000	0.00419682	-7.89649	0.237138	0.625
XP32	3627700	2694500	2861200	0	0	0	3.06113e+06	11000	0.00359344	-8.12042	0.00043967	3.35687
