# Supplementary material for: Convergent organization of aberrant MYB complex controls oncogenic gene expression in acute myeloid leukemia
Source: eLife. 2021 Feb 2;10:e65905. doi: 10.7554/eLife.65905 (PMC7886351; doi:10.7554/eLife.65905)
Supplement: Figure 9—source data 1. [file elife-65905-fig9-data1.xlsx]

## Sheet: table.expression.all.coding.AML
gene	name	expr_pbs	expr_crybmim	lfc	pval	cell_line
DUX4	DUX4	0	0	0	0.42265	HL60
DUXB	DUXB	0	0	0	NA	HL60
ENSG00000000003	TSPAN6	0	0.15038	3.54514	0.152067	HL60
ENSG00000000005	TNMD	0	0	0	NA	HL60
ENSG00000000419	DPM1	98.1063	102.967	0.0697575	0.965761	HL60
ENSG00000000457	SCYL3	4.65983	3.59837	-0.37165	0.122517	HL60
ENSG00000000460	C1orf112	16.8828	15.8327	-0.0925682	0.374611	HL60
ENSG00000000938	FGR	23.2596	21.918	-0.0856573	0.396095	HL60
ENSG00000000971	CFH	0.148402	0	-3.52769	0.479739	HL60
ENSG00000001036	FUCA2	35.5886	38.5765	0.116262	0.509996	HL60
ENSG00000001084	GCLC	32.8377	28.9803	-0.180198	0.0679808	HL60
ENSG00000001167	NFYA	24.1102	38.7013	0.682423	0.0402247	HL60
ENSG00000001460	STPG1	2.4239	2.69609	0.152697	0.690651	HL60
ENSG00000001461	NIPAL3	9.2603	10.0734	0.121237	0.738311	HL60
ENSG00000001497	LAS1L	72.9712	71.8815	-0.021702	0.717518	HL60
ENSG00000001561	ENPP4	0.560923	0.440398	-0.339352	0.507893	HL60
ENSG00000001617	SEMA3F	0.300612	0.499864	0.707654	0.413734	HL60
ENSG00000001626	CFTR	0	0	0	NA	HL60
ENSG00000001629	ANKIB1	7.29199	7.9435	0.123233	0.309803	HL60
ENSG00000001630	CYP51A1	105.292	126.629	0.266179	0.625475	HL60
ENSG00000001631	KRIT1	22.3714	27.4165	0.293222	0.0859535	HL60
ENSG00000002016	RAD52	5.64918	4.40398	-0.358219	0.0517904	HL60
ENSG00000002330	BAD	17.1349	19.6997	0.201085	0.330115	HL60
ENSG00000002549	LAP3	59.4007	56.8436	-0.063469	0.982464	HL60
ENSG00000002586	CD99	53.7513	60.1467	0.162147	0.3651	HL60
ENSG00000002587	HS3ST1	0.178083	0	-3.76972	0.625247	HL60
ENSG00000002726	ABP1	2.72071	2.15159	-0.336614	0.33543	HL60
ENSG00000002745	WNT16	0	0	0	NA	HL60
ENSG00000002746	HECW1	0	0	0	NA	HL60
ENSG00000002822	MAD1L1	33.9886	32.0674	-0.0839074	0.401853	HL60
ENSG00000002834	LASP1	91.6964	85.8991	-0.0942083	0.150299	HL60
ENSG00000002919	SNX11	25.9165	26.0694	0.00848098	0.332069	HL60
ENSG00000002933	TMEM176A	0	0	0	NA	HL60
ENSG00000003056	M6PR	219.195	208.244	-0.0739357	0.236378	HL60
ENSG00000003096	KLHL13	1.66375	1.43935	-0.207137	0.49427	HL60
ENSG00000003137	CYP26B1	0	0	0	0.42265	HL60
ENSG00000003147	ICA1	1.34791	1.71693	0.345896	0.411907	HL60
ENSG00000003249	DBNDD1	0.223035	0	-4.07297	0.0740218	HL60
ENSG00000003393	ALS2	26.7436	25.4279	-0.0727453	0.201075	HL60
ENSG00000003400	CASP10	5.93609	4.97691	-0.253604	0.0723996	HL60
ENSG00000003402	CFLAR	32.524	79.4024	1.28731	0.160859	HL60
ENSG00000003436	TFPI	0.865152	1.0106	0.22085	0.35221	HL60
ENSG00000003509	NDUFAF7	16.1622	18.3725	0.184775	0.564957	HL60
ENSG00000003756	RBM5	47.4676	51.9424	0.129932	0.103709	HL60
ENSG00000003987	MTMR7	0.436373	0.440398	0.0128344	0.952752	HL60
ENSG00000003989	SLC7A2	11.304	11.1383	-0.0212817	0.687753	HL60
ENSG00000004059	ARF5	91.9203	97.7039	0.0880186	0.124709	HL60
ENSG00000004139	SARM1	0.320007	0.423798	0.390298	0.343504	HL60
ENSG00000004142	POLDIP2	100.966	82.6515	-0.288713	0.107312	HL60
ENSG00000004399	PLXND1	53.412	59.473	0.155032	0.247856	HL60
ENSG00000004455	AK2	456.173	437.068	-0.06172	0.293964	HL60
ENSG00000004468	CD38	5.55024	5.72517	0.0446565	0.796552	HL60
ENSG00000004478	FKBP4	131.629	184.341	0.485854	0.00222336	HL60
ENSG00000004487	KDM1A	76.352	67.7246	-0.172952	0.450387	HL60
ENSG00000004534	RBM6	39.4869	34.4584	-0.19644	0.661393	HL60
ENSG00000004660	CAMKK1	2.65145	2.28199	-0.215257	0.262175	HL60
ENSG00000004700	RECQL	32.8853	30.7849	-0.0951772	0.223329	HL60
ENSG00000004766	CCDC132	8.41714	7.41103	-0.183329	0.127143	HL60
ENSG00000004776	HSPB6	0.310309	0.260799	-0.238924	0.644142	HL60
ENSG00000004777	ARHGAP33	8.86456	10.3233	0.219458	0.146428	HL60
ENSG00000004779	NDUFAB1	161.991	152.796	-0.0843059	0.272113	HL60
ENSG00000004799	PDK4	0	0	0	0.42265	HL60
ENSG00000004809	SLC22A16	20.7446	23.4067	0.174072	0.0790648	HL60
ENSG00000004838	ZMYND10	0.646487	0.825863	0.346582	0.375337	HL60
ENSG00000004846	ABCB5	0	0.140893	3.45943	0.471458	HL60
ENSG00000004848	ARX	0	0	0	0.804111	HL60
ENSG00000004864	SLC25A13	15.7724	15.9413	0.0153577	0.410833	HL60
ENSG00000004866	ST7	18.7196	18.2497	-0.0366523	0.367219	HL60
ENSG00000004897	CDC27	30.9146	28.0029	-0.142645	0.993207	HL60
ENSG00000004939	SLC4A1	0	0.141266	3.4629	0.141364	HL60
ENSG00000004948	CALCR	0	0	0	NA	HL60
ENSG00000004961	HCCS	27.0163	23.9283	-0.175016	0.0552071	HL60
ENSG00000004975	DVL2	13.9597	14.8231	0.0864989	0.185296	HL60
ENSG00000005001	PRSS22	0	0	0	NA	HL60
ENSG00000005007	UPF1	58.0957	52.7833	-0.138316	0.487599	HL60
ENSG00000005020	SKAP2	34.8342	34.5189	-0.0131158	0.684819	HL60
ENSG00000005022	SLC25A5	522.309	549.373	0.0728799	0.0378431	HL60
ENSG00000005059	CCDC109B	5.66897	5.57479	-0.0241068	0.43788	HL60
ENSG00000005073	HOXA11	0.0872745	0.162999	0.804928	0.39785	HL60
ENSG00000005075	POLR2J	154.149	171.691	0.155472	0.623028	HL60
ENSG00000005100	DHX33	19.0904	18.2125	-0.0678694	0.314605	HL60
ENSG00000005102	MEOX1	0	0	0	NA	HL60
ENSG00000005108	THSD7A	0.123593	0.141266	0.174228	0.386597	HL60
ENSG00000005156	LIG3	33.0674	31.7305	-0.0595102	0.389226	HL60
ENSG00000005175	RPAP3	25.0228	21.8854	-0.193163	0.424346	HL60
ENSG00000005187	ACSM3	2.97703	3.83592	0.364174	0.264773	HL60
ENSG00000005189	AC004381.6	20.3059	20.125	-0.0129011	0.331045	HL60
ENSG00000005194	CIAPIN1	55.9021	51.7736	-0.110657	0.242021	HL60
ENSG00000005206	SPPL2B	36.0797	41.3867	0.197907	0.345889	HL60
ENSG00000005238	FAM214B	4.1058	3.24391	-0.338619	0.787907	HL60
ENSG00000005243	COPZ2	1.0279	1.23986	0.26714	0.276473	HL60
ENSG00000005249	PRKAR2B	1.09578	1.13859	0.0546007	0.429743	HL60
ENSG00000005302	MSL3	24.272	23.0807	-0.072564	0.305334	HL60
ENSG00000005339	CREBBP	15.7288	16.7237	0.0884099	0.681184	HL60
ENSG00000005379	BZRAP1	2.07763	2.09726	0.0134733	0.426948	HL60
ENSG00000005381	MPO	5877.15	5470.46	-0.103453	0.362895	HL60
ENSG00000005421	PON1	0	0	0	NA	HL60
ENSG00000005436	GCFC2	12.9651	13.9853	0.109164	0.292968	HL60
ENSG00000005448	WDR54	8.65957	9.51916	0.136326	0.381591	HL60
ENSG00000005469	CROT	0.375952	0.332984	-0.168389	0.455095	HL60
ENSG00000005471	ABCB4	0.408808	0.402065	-0.0231891	0.428684	HL60
ENSG00000005483	MLL5	26.3824	27.5493	0.0624108	0.195835	HL60
ENSG00000005486	RHBDD2	11.2875	15.1024	0.419599	0.251895	HL60
ENSG00000005513	SOX8	0	0	0	NA	HL60
ENSG00000005700	IBTK	22.2848	22.6026	0.0204145	0.778924	HL60
ENSG00000005801	ZNF195	28.4806	31.8827	0.162717	0.0733684	HL60
ENSG00000005810	MYCBP2	37.9118	40.7744	0.104978	0.751633	HL60
ENSG00000005812	FBXL3	24.704	23.7218	-0.0584969	0.262719	HL60
ENSG00000005844	ITGAL	79.4392	78.7612	-0.0123633	0.472505	HL60
ENSG00000005882	PDK2	3.71995	3.9421	0.083374	0.409285	HL60
ENSG00000005884	ITGA3	0.552739	0	-5.33024	0.740412	HL60
ENSG00000005889	ZFX	11.2565	14.1809	0.332825	0.0301079	HL60
ENSG00000005893	LAMP2	126.464	125.39	-0.0123072	0.282814	HL60
ENSG00000005955	GGNBP2	49.058	50.0657	0.0293269	0.409196	HL60
ENSG00000005961	ITGA2B	1.09818	1.48231	0.427998	0.290711	HL60
ENSG00000005981	ASB4	0	0	0	NA	HL60
ENSG00000006007	GDE1	36.1843	29.0804	-0.315179	0.00634241	HL60
ENSG00000006015	C19orf60	39.3501	39.4132	0.00231006	0.642997	HL60
ENSG00000006016	CRLF1	0	0	0	0.42265	HL60
ENSG00000006025	OSBPL7	7.43001	5.85407	-0.343188	0.806008	HL60
ENSG00000006042	TMEM98	0.385846	0	-4.82709	0.697029	HL60
ENSG00000006047	YBX2	0.366059	0.281787	-0.361569	0.103676	HL60
ENSG00000006059	KRT33A	0	0	0	NA	HL60
ENSG00000006062	MAP3K14	2.95673	4.14619	0.485819	0.0866644	HL60
ENSG00000006071	ABCC8	0	0	0	NA	HL60
ENSG00000006074	CCL18	0	0	0	NA	HL60
ENSG00000006075	CCL3	40.0488	1656.42	5.36967	0.072292	HL60
ENSG00000006114	SYNRG	7.7466	7.30416	-0.0846856	0.672593	HL60
ENSG00000006116	CACNG3	0	0	0	NA	HL60
ENSG00000006118	TMEM132A	0	0.575931	5.38809	0.166247	HL60
ENSG00000006125	AP2B1	58.3359	54.8027	-0.0901161	0.994449	HL60
ENSG00000006128	TAC1	0	0	0	NA	HL60
ENSG00000006194	ZNF263	40.379	39.8829	-0.0178306	0.358259	HL60
ENSG00000006210	CX3CL1	0	0	0	0.42265	HL60
ENSG00000006282	SPATA20	4.44217	4.67251	0.0727084	0.420268	HL60
ENSG00000006283	CACNA1G	0	0	0	0.934631	HL60
ENSG00000006327	TNFRSF12A	8.7656	5.80277	-0.593929	0.0082035	HL60
ENSG00000006377	DLX6	0	0	0	NA	HL60
ENSG00000006432	MAP3K9	0.218665	0.206466	-0.0776673	0.51662	HL60
ENSG00000006451	RALA	33.9346	34.3711	0.0184301	0.656094	HL60
ENSG00000006453	BAIAP2L1	0.0989348	0.084536	-0.196601	0.240773	HL60
ENSG00000006459	JHDM1D	0.64971	0.760663	0.222988	0.490073	HL60
ENSG00000006468	ETV1	1.55328	1.80456	0.214523	0.0486523	HL60
ENSG00000006530	AGK	28.3789	27.373	-0.0520371	0.976173	HL60
ENSG00000006534	ALDH3B1	28.626	25.091	-0.190057	0.333123	HL60
ENSG00000006555	TTC22	0	0	0	0.42265	HL60
ENSG00000006576	PHTF2	11.8402	14.7265	0.314377	0.00309813	HL60
ENSG00000006606	CCL26	0	0	0	0.42265	HL60
ENSG00000006607	FARP2	15.3731	14.0605	-0.128634	0.465433	HL60
ENSG00000006611	USH1C	0	0	0	NA	HL60
ENSG00000006625	GGCT	154.767	160.477	0.0522628	0.661094	HL60
ENSG00000006634	DBF4	37.4392	28.787	-0.37897	0.0165986	HL60
ENSG00000006638	TBXA2R	0.349098	0.408174	0.217427	0.430159	HL60
ENSG00000006652	IFRD1	26.1533	45.2703	0.791247	0.0189072	HL60
ENSG00000006659	LGALS14	0	0	0	NA	HL60
ENSG00000006695	COX10	8.32987	8.18256	-0.0256971	0.363839	HL60
ENSG00000006704	GTF2IRD1	1.7303	2.10812	0.282845	0.34398	HL60
ENSG00000006712	PAF1	33.9886	36.4632	0.10135	0.0566116	HL60
ENSG00000006715	VPS41	20.5677	21.311	0.0511809	0.304644	HL60
ENSG00000006740	ARHGAP44	0.89214	0.956262	0.0986321	0.383169	HL60
ENSG00000006744	ELAC2	36.8686	37.5442	0.0261846	0.489655	HL60
ENSG00000006747	SCIN	0.562436	0.601519	0.0946292	0.834094	HL60
ENSG00000006756	ARSD	4.9057	4.87911	-0.00781672	0.490444	HL60
ENSG00000006757	PNPLA4	11.4656	10.9803	-0.0623226	0.545424	HL60
ENSG00000006788	MYH13	0	0	0	0.42265	HL60
ENSG00000006831	ADIPOR2	71.0565	83.6434	0.235241	0.939057	HL60
ENSG00000006837	CDKL3	1.18722	1.39638	0.231574	0.0130062	HL60
ENSG00000007001	UPP2	0	0	0	NA	HL60
ENSG00000007038	PRSS21	0	0	0	0.424582	HL60
ENSG00000007047	MARK4	5.00077	6.68116	0.416929	0.025046	HL60
ENSG00000007062	PROM1	0	0	0	0.42265	HL60
ENSG00000007080	CCDC124	118.849	122.978	0.0492587	0.289854	HL60
ENSG00000007129	CEACAM21	1.03628	0.98821	-0.0675843	0.483144	HL60
ENSG00000007168	PAFAH1B1	22.2087	22.5784	0.0238044	0.618702	HL60
ENSG00000007171	NOS2	0.104579	0.107414	0.034065	0.723998	HL60
ENSG00000007174	DNAH9	0.304229	0	-4.4978	0.310805	HL60
ENSG00000007202	KIAA0100	73.3953	66.4168	-0.144111	0.770272	HL60
ENSG00000007216	SLC13A2	0	0	0	NA	HL60
ENSG00000007237	GAS7	29.244	24.5441	-0.252631	0.218612	HL60
ENSG00000007255	TRAPPC6A	42.5027	48.0034	0.175527	0.0331172	HL60
ENSG00000007264	MATK	64.6025	61.4087	-0.0731328	0.566003	HL60
ENSG00000007306	CEACAM7	0	0	0	NA	HL60
ENSG00000007312	CD79B	0.316591	0.397432	0.315529	0.424689	HL60
ENSG00000007314	SCN4A	0.0290915	0.0325999	0.112697	0.8622	HL60
ENSG00000007341	ST7L	14.9491	19.6142	0.391525	0.121392	HL60
ENSG00000007350	TKTL1	0.237444	0	-4.15807	0.664861	HL60
ENSG00000007372	PAX6	0.931702	1.11926	0.261001	0.793815	HL60
ENSG00000007376	RPUSD1	46.7847	34.5232	-0.438316	0.0943315	HL60
ENSG00000007384	RHBDF1	1.10283	1.08666	-0.0210377	0.335837	HL60
ENSG00000007392	LUC7L	24.7337	33.2232	0.425502	0.0207722	HL60
ENSG00000007402	CACNA2D2	0	0.150286	3.54432	0.196753	HL60
ENSG00000007516	BAIAP3	0.532401	0.558553	0.0674393	0.633405	HL60
ENSG00000007520	TSR3	43.6474	37.4681	-0.220155	0.1869	HL60
ENSG00000007541	PIGQ	13.6143	16.1261	0.244044	0.246062	HL60
ENSG00000007545	CRAMP1L	17.6104	17.6159	0.000451573	0.579212	HL60
ENSG00000007866	TEAD3	2.03453	1.80386	-0.172343	0.222729	HL60
ENSG00000007908	SELE	0	0	0	NA	HL60
ENSG00000007923	DNAJC11	57.126	45.4333	-0.330306	0.0283127	HL60
ENSG00000007933	FMO3	0	0	0	0.42265	HL60
ENSG00000007944	MYLIP	19.3281	24.7759	0.358009	0.13138	HL60
ENSG00000007952	NOX1	0	0	0	NA	HL60
ENSG00000007968	E2F2	11.9315	12.5944	0.0779138	0.990368	HL60
ENSG00000008018	PSMB1	392.998	411.815	0.0674737	0.697738	HL60
ENSG00000008056	SYN1	0.118722	0.15038	0.308441	0.324542	HL60
ENSG00000008083	JARID2	35.2906	26.9932	-0.386512	0.0958152	HL60
ENSG00000008086	CDKL5	0.0678802	0.0869329	0.301514	0.80066	HL60
ENSG00000008118	CAMK1G	0	0.140893	3.45943	0.20148	HL60
ENSG00000008128	CDK11A	30.2246	34.6102	0.195389	0.331977	HL60
ENSG00000008130	NADK	75.3982	68.9161	-0.129664	0.136878	HL60
ENSG00000008196	TFAP2B	0	0	0	NA	HL60
ENSG00000008197	TFAP2D	0	0	0	NA	HL60
ENSG00000008226	DLEC1	0.217657	0.236311	0.111693	0.289136	HL60
ENSG00000008256	CYTH3	10.3566	9.90358	-0.0644354	0.974467	HL60
ENSG00000008277	ADAM22	0.562436	0.665968	0.238272	0.396725	HL60
ENSG00000008282	SYPL1	90.8124	89.2149	-0.0256002	0.452038	HL60
ENSG00000008283	CYB561	2.2532	2.19506	-0.0374779	0.4235	HL60
ENSG00000008294	SPAG9	28.403	31.1608	0.133627	0.133677	HL60
ENSG00000008300	CELSR3	0.573822	0.590778	0.0410194	0.423232	HL60
ENSG00000008311	AASS	0.242429	0.279277	0.193639	0.31854	HL60
ENSG00000008323	PLEKHG6	0	0	0	NA	HL60
ENSG00000008324	SS18L2	35.7535	37.0364	0.0508406	0.268641	HL60
ENSG00000008382	MPND	16.8149	18.9361	0.171261	0.00761169	HL60
ENSG00000008394	MGST1	350.976	368.943	0.0720248	0.528709	HL60
ENSG00000008405	CRY1	11.4764	10.6985	-0.101138	0.126184	HL60
ENSG00000008438	PGLYRP1	2.50989	5.20958	1.04936	0.336421	HL60
ENSG00000008441	NFIX	8.99897	8.91537	-0.0134444	0.466603	HL60
ENSG00000008513	ST3GAL1	24.614	27.3906	0.154116	0.360015	HL60
ENSG00000008516	MMP25	2.46235	1.98859	-0.306338	0.253783	HL60
ENSG00000008517	IL32	0	1.75647	6.97346	0.507574	HL60
ENSG00000008710	PKD1	19.4041	21.7915	0.167288	0.165185	HL60
ENSG00000008735	MAPK8IP2	0.237679	0.279277	0.220605	0.263742	HL60
ENSG00000008838	MED24	53.8799	51.5803	-0.0629114	0.978565	HL60
ENSG00000008853	RHOBTB2	17.9765	9.62782	-0.899848	0.0255651	HL60
ENSG00000008869	HEATR5B	11.9372	14.6298	0.293131	0.489069	HL60
ENSG00000008952	SEC62	80.6112	74.9905	-0.104253	0.0822266	HL60
ENSG00000008988	RPS20	2518.89	2949.44	0.227652	0.293605	HL60
ENSG00000009307	CSDE1	374.459	374.779	0.0012331	0.449447	HL60
ENSG00000009335	UBE3C	43.5791	42.7752	-0.026852	0.297917	HL60
ENSG00000009413	REV3L	16.6306	18.0885	0.121133	0.959649	HL60
ENSG00000009694	TENM1	0.0193943	0.0214828	0.0872906	0.364111	HL60
ENSG00000009709	PAX7	0	0	0	NA	HL60
ENSG00000009724	MASP2	0.118722	0	-3.2367	0.996257	HL60
ENSG00000009765	IYD	0.418315	0.467265	0.154717	0.619933	HL60
ENSG00000009780	FAM76A	4.14537	3.56615	-0.21634	0.162944	HL60
ENSG00000009790	TRAF3IP3	23.0405	20.4624	-0.171085	0.234102	HL60
ENSG00000009830	POMT2	7.1953	8.47239	0.235288	0.0251874	HL60
ENSG00000009844	VTA1	58.1733	53.0089	-0.13409	0.141537	HL60
ENSG00000009950	MLXIPL	0.474887	0.461881	-0.0388943	0.568813	HL60
ENSG00000009954	BAZ1B	39.3692	35.2948	-0.157552	0.827647	HL60
ENSG00000010017	RANBP9	54.149	76.2619	0.493919	0.480737	HL60
ENSG00000010030	ETV7	0.300612	0	-4.48131	0.00538893	HL60
ENSG00000010072	SPRTN	10.1536	11.2785	0.151375	0.675823	HL60
ENSG00000010165	METTL13	32.0395	20.8061	-0.622499	0.0612713	HL60
ENSG00000010219	DYRK4	28.7909	23.76	-0.276928	0.0975641	HL60
ENSG00000010244	ZNF207	163.475	175.171	0.0996861	0.536806	HL60
ENSG00000010256	UQCRC1	207.597	208.367	0.00534349	0.547509	HL60
ENSG00000010270	STARD3NL	48.3593	46.4888	-0.0568935	0.383869	HL60
ENSG00000010278	CD9	1.0279	0.955986	-0.103172	0.894153	HL60
ENSG00000010282	HHATL	0	0	0	NA	HL60
ENSG00000010292	NCAPD2	83.2067	65.7539	-0.339558	0.0249534	HL60
ENSG00000010295	IFFO1	11.0609	11.9207	0.107864	0.927101	HL60
ENSG00000010310	GIPR	0.247186	0.311501	0.317486	0.338977	HL60
ENSG00000010318	PHF7	27.6424	22.9866	-0.265939	0.15617	HL60
ENSG00000010319	SEMA3G	3.47159	3.99892	0.203244	0.228408	HL60
ENSG00000010322	NISCH	28.9873	31.5905	0.12401	0.162981	HL60
ENSG00000010327	STAB1	0.296804	0.315132	0.0826357	0.386614	HL60
ENSG00000010361	FUZ	10.6087	10.9427	0.0446598	0.659487	HL60
ENSG00000010379	SLC6A13	0	0.451139	5.04526	0.361545	HL60
ENSG00000010404	IDS	13.4791	14.8231	0.136995	0.239025	HL60
ENSG00000010438	PRSS3	0	0	0	NA	HL60
ENSG00000010539	ZNF200	12.519	7.1323	-0.810462	5.50619e-05	HL60
ENSG00000010610	CD4	101.156	100.507	-0.00928187	0.364356	HL60
ENSG00000010626	LRRC23	4.48738	4.88734	0.122807	0.771416	HL60
ENSG00000010671	BTK	75.6767	75.6099	-0.00127357	0.543807	HL60
ENSG00000010704	HFE	0.717591	0.741157	0.0457354	0.713959	HL60
ENSG00000010803	SCMH1	25.5617	27.7859	0.120305	0.146849	HL60
ENSG00000010810	FYN	10.2002	8.35643	-0.287197	0.719416	HL60
ENSG00000010818	HIVEP2	0.0593609	0.0644485	0.0966203	0.423497	HL60
ENSG00000010932	FMO1	0.232732	0.214828	-0.108639	0.647071	HL60
ENSG00000011007	TCEB3	31.3451	24.1585	-0.375516	0.00121729	HL60
ENSG00000011009	LYPLA2	38.4279	35.8763	-0.0990866	0.0206408	HL60
ENSG00000011021	CLCN6	11.2196	13.6738	0.285067	0.367509	HL60
ENSG00000011028	MRC2	21.0235	23.2766	0.146789	0.364924	HL60
ENSG00000011052	NME2	922.744	1042.49	0.176027	0.0325807	HL60
ENSG00000011083	SLC6A7	0	0	0	NA	HL60
ENSG00000011105	TSPAN9	0.158296	0.239066	0.554386	0.330803	HL60
ENSG00000011114	BTBD7	16.7611	16.3543	-0.0354225	0.405859	HL60
ENSG00000011132	APBA3	3.60321	3.42298	-0.0737338	0.49666	HL60
ENSG00000011143	MKS1	11.9857	10.5624	-0.182155	0.379971	HL60
ENSG00000011198	ABHD5	12.5966	17.5713	0.479729	0.0853311	HL60
ENSG00000011201	KAL1	0	0	0	NA	HL60
ENSG00000011243	AKAP8L	58.0253	75.1209	0.372454	0.0330001	HL60
ENSG00000011258	MBTD1	20.4689	20.0327	-0.0310541	0.553778	HL60
ENSG00000011260	UTP18	71.1143	70.6355	-0.00974481	0.488428	HL60
ENSG00000011275	RNF216	19.3661	16.9177	-0.194845	0.967413	HL60
ENSG00000011295	TTC19	20.1119	19.4097	-0.0512349	0.198512	HL60
ENSG00000011304	PTBP1	352.221	378.81	0.104989	0.15831	HL60
ENSG00000011332	DPF1	0.579937	0.749797	0.362831	0.317621	HL60
ENSG00000011347	SYT7	0.358795	0	-4.72605	0.392543	HL60
ENSG00000011376	LARS2	17.1224	16.2518	-0.0752256	0.745894	HL60
ENSG00000011405	PIK3C2A	6.01524	7.28063	0.274856	0.0270225	HL60
ENSG00000011422	PLAUR	94.5487	166.911	0.819858	0.270478	HL60
ENSG00000011426	ANLN	31.9536	29.003	-0.13971	0.0201044	HL60
ENSG00000011451	WIZ	22.6936	27.6806	0.28643	0.0273879	HL60
ENSG00000011454	RABGAP1	7.03427	7.7479	0.13914	0.336534	HL60
ENSG00000011465	DCN	0	0	0	NA	HL60
ENSG00000011478	QPCTL	19.6756	24.2648	0.302268	0.0608	HL60
ENSG00000011485	PPP5C	81.2235	80.668	-0.00989887	0.374269	HL60
ENSG00000011523	CEP68	10.7051	7.85197	-0.446478	6.99685e-05	HL60
ENSG00000011566	MAP4K3	6.05606	6.8745	0.182477	0.052967	HL60
ENSG00000011590	ZBTB32	0	0	0	NA	HL60
ENSG00000011600	TYROBP	208.218	224.743	0.11017	0.588754	HL60
ENSG00000011638	TMEM159	6.21768	6.17113	-0.0108185	0.379529	HL60
ENSG00000011677	GABRA3	0	0	0	NA	HL60
ENSG00000012048	BRCA1	25.232	20.7417	-0.282549	0.0260411	HL60
ENSG00000012061	ERCC1	102.714	100.808	-0.0270186	0.309477	HL60
ENSG00000012124	CD22	1.54185	1.86906	0.27536	0.926191	HL60
ENSG00000012171	SEMA3B	0.370779	0.461881	0.306505	0.146017	HL60
ENSG00000012174	MBTPS2	9.298	8.8187	-0.0762366	0.269148	HL60
ENSG00000012211	PRICKLE3	6.01524	5.04846	-0.252132	0.367148	HL60
ENSG00000012223	LTF	0.911534	1.16007	0.343134	0.895815	HL60
ENSG00000012232	EXTL3	6.75725	5.38984	-0.325431	0.484557	HL60
ENSG00000012504	NR1H4	0	0	0	NA	HL60
ENSG00000012660	ELOVL5	117.594	110.551	-0.0890956	0.201758	HL60
ENSG00000012779	ALOX5	6.39044	6.28373	-0.02424	0.40066	HL60
ENSG00000012817	KDM5D	0	0	0	NA	HL60
ENSG00000012822	CALCOCO1	12.5093	12.7031	0.0221464	0.421159	HL60
ENSG00000012963	UBR7	33.7029	27.6012	-0.288007	0.0320655	HL60
ENSG00000012983	MAP4K5	13.6827	16.3977	0.260899	0.173087	HL60
ENSG00000013016	EHD3	0	0	0	NA	HL60
ENSG00000013275	PSMC4	78.5101	86.9517	0.147311	0.0396346	HL60
ENSG00000013288	MAN2B2	23.4066	19.8072	-0.240737	0.031032	HL60
ENSG00000013293	SLC7A14	0	0	0	NA	HL60
ENSG00000013297	CLDN11	0	0	0	NA	HL60
ENSG00000013306	SLC25A39	174.985	175.515	0.00435643	0.282337	HL60
ENSG00000013364	MVP	3.54916	3.74898	0.0787159	0.957574	HL60
ENSG00000013374	NUB1	41.3196	34.8384	-0.246059	0.0131152	HL60
ENSG00000013375	PGM3	13.7124	11.5838	-0.243095	0.101489	HL60
ENSG00000013392	RWDD2A	2.40412	1.04192	-1.19532	0.00193425	HL60
ENSG00000013441	CLK1	45.0531	126.368	1.48764	0.0842249	HL60
ENSG00000013503	POLR3B	8.97476	7.58344	-0.242607	0.0268093	HL60
ENSG00000013523	ANGEL1	5.29549	5.12904	-0.0459499	0.462275	HL60
ENSG00000013561	RNF14	14.9167	11.8989	-0.325753	0.263753	HL60
ENSG00000013563	DNASE1L1	7.91289	8.1065	0.0348125	0.538353	HL60
ENSG00000013573	DDX11	58.0451	55.8446	-0.0557417	0.823338	HL60
ENSG00000013583	HEBP1	34.5898	34.0016	-0.0247321	0.415131	HL60
ENSG00000013588	GPRC5A	0	0	0	0.670053	HL60
ENSG00000013619	MAMLD1	0	0	0	0.982988	HL60
ENSG00000013725	CD6	0.613396	0.676709	0.138683	0.84456	HL60
ENSG00000013810	TACC3	99.5875	72.9557	-0.44887	0.0722961	HL60
ENSG00000014123	UFL1	24.1007	18.6149	-0.372369	0.0290578	HL60
ENSG00000014138	POLA2	32.7861	31.3005	-0.0668718	0.901078	HL60
ENSG00000014164	ZC3H3	17.6833	15.8114	-0.161292	0.180361	HL60
ENSG00000014216	CAPN1	62.1976	62.2894	0.00212724	0.496164	HL60
ENSG00000014257	ACPP	10.9998	9.77996	-0.169345	0.276068	HL60
ENSG00000014641	MDH1	326.571	324.144	-0.0107632	0.290686	HL60
ENSG00000014824	SLC30A9	35.5275	36.1771	0.0261296	0.543317	HL60
ENSG00000014914	MTMR11	1.21215	0.998951	-0.275544	0.336659	HL60
ENSG00000014919	COX15	18.9386	17.1258	-0.145044	0.148748	HL60
ENSG00000015133	CCDC88C	19.5372	25.1456	0.363852	0.0374646	HL60
ENSG00000015153	YAF2	11.3478	13.8169	0.283703	1.25513e-05	HL60
ENSG00000015171	ZMYND11	10.4729	10.4084	-0.00890279	0.462263	HL60
ENSG00000015285	WAS	85.5969	83.9772	-0.0275562	0.391223	HL60
ENSG00000015413	DPEP1	0	0	0	0.42265	HL60
ENSG00000015475	BID	91.3086	91.5705	0.00413281	0.807249	HL60
ENSG00000015479	MATR3	235.131	222.336	-0.0807158	0.846312	HL60
ENSG00000015520	NPC1L1	0	0	0	0.972491	HL60
ENSG00000015532	XYLT2	6.92121	6.81337	-0.0226102	0.534629	HL60
ENSG00000015568	RGPD5	0.736985	0.814996	0.142566	0.428912	HL60
ENSG00000015592	STMN4	0	0	0	0.42265	HL60
ENSG00000015676	NUDCD3	20.2788	19.1361	-0.0836129	0.640276	HL60
ENSG00000016082	ISL1	0	0	0	NA	HL60
ENSG00000016391	CHDH	0.145458	0	-3.50131	0.211636	HL60
ENSG00000016402	IL20RA	0	0	0	0.42265	HL60
ENSG00000016490	CLCA1	0	0	0	NA	HL60
ENSG00000016602	CLCA4	0	0	0	NA	HL60
ENSG00000016864	GLT8D1	20.8101	16.5064	-0.334006	0.302708	HL60
ENSG00000017260	ATP2C1	34.8818	39.6143	0.183479	0.289129	HL60
ENSG00000017373	SRCIN1	0	0.107414	3.10832	0.152895	HL60
ENSG00000017427	IGF1	0.271521	0.375949	0.44957	0.502939	HL60
ENSG00000017483	SLC38A5	49.9598	50.388	0.0123074	0.433257	HL60
ENSG00000017621	MAGIX	1.09332	1.03118	-0.0833247	0.849464	HL60
ENSG00000017797	RALBP1	75.059	58.9949	-0.347363	0.00263049	HL60
ENSG00000018189	RUFY3	3.30674	4.12348	0.317241	0.053305	HL60
ENSG00000018236	CNTN1	0	0	0	NA	HL60
ENSG00000018280	SLC11A1	5.65345	7.90568	0.482736	0.47198	HL60
ENSG00000018408	WWTR1	0	0.623002	5.49882	0.184438	HL60
ENSG00000018510	AGPS	41.9076	36.6604	-0.192917	0.0270092	HL60
ENSG00000018610	CXorf56	27.8996	26.3594	-0.081884	0.706993	HL60
ENSG00000018625	ATP1A2	0	0.206644	3.96963	0.561321	HL60
ENSG00000018699	TTC27	20.6496	17.6911	-0.222922	0.161199	HL60
ENSG00000018869	ZNF582	3.16128	2.4383	-0.372735	0.0978244	HL60
ENSG00000019102	VSIG2	0	0	0	0.42265	HL60
ENSG00000019144	PHLDB1	0.684516	1.0106	0.552631	0.360343	HL60
ENSG00000019169	MARCO	0.874659	0.565064	-0.617829	0.0245656	HL60
ENSG00000019186	CYP24A1	0	0	0	NA	HL60
ENSG00000019485	PRDM11	1.60671	1.6864	0.0692456	0.474747	HL60
ENSG00000019505	SYT13	0	0	0	0.42265	HL60
ENSG00000019549	SNAI2	0	0	0	0.42265	HL60
ENSG00000019582	CD74	305.849	323.043	0.0789035	0.752174	HL60
ENSG00000019991	HGF	31.2734	52.9659	0.759863	0.137826	HL60
ENSG00000019995	ZRANB1	18.7576	34.5229	0.879581	0.249734	HL60
ENSG00000020129	NCDN	18.5485	20.4409	0.140057	0.104398	HL60
ENSG00000020181	GPR124	20.9071	19.7881	-0.079304	0.519239	HL60
ENSG00000020256	ZFP64	7.33107	5.59631	-0.388691	0.206913	HL60
ENSG00000020426	MNAT1	28.1272	30.7199	0.12715	0.264366	HL60
ENSG00000020577	SAMD4A	0	0	0	0.42265	HL60
ENSG00000020633	RUNX3	20.4125	17.1149	-0.254009	0.0804938	HL60
ENSG00000020922	MRE11A	23.5059	21.6898	-0.115938	0.0388875	HL60
ENSG00000021300	PLEKHB1	1.18305	1.21378	0.0365597	0.802828	HL60
ENSG00000021355	SERPINB1	111.052	112.946	0.0243941	0.428135	HL60
ENSG00000021461	CYP3A43	0	0	0	0.42265	HL60
ENSG00000021488	SLC7A9	0	0	0	NA	HL60
ENSG00000021574	SPAST	12.3973	12.1271	-0.0317649	0.747445	HL60
ENSG00000021645	NRXN3	0	0	0	NA	HL60
ENSG00000021762	OSBPL5	36.498	39.6958	0.121123	0.65858	HL60
ENSG00000021776	AQR	18.0446	15.9832	-0.174863	0.0343059	HL60
ENSG00000021826	CPS1	2.83313	3.29761	0.218017	0.547099	HL60
ENSG00000021852	C8B	0	0	0	0.42265	HL60
ENSG00000022267	FHL1	1.09578	1.18446	0.110901	0.35581	HL60
ENSG00000022277	RTFDC1	132.618	134.622	0.0216311	0.455412	HL60
ENSG00000022355	GABRA1	0	0	0	NA	HL60
ENSG00000022556	NLRP2	0	0	0	0.42265	HL60
ENSG00000022567	SLC45A4	11.4466	7.93263	-0.528265	0.0226636	HL60
ENSG00000022840	RNF10	63.3807	66.7686	0.0751102	0.225946	HL60
ENSG00000022976	ZNF839	7.60809	8.56289	0.170267	0.214013	HL60
ENSG00000023041	ZDHHC6	35.9086	32.1109	-0.161202	0.127823	HL60
ENSG00000023171	GRAMD1B	11.6748	12.5727	0.10677	0.62699	HL60
ENSG00000023191	RNH1	200.886	169.856	-0.242048	0.162967	HL60
ENSG00000023228	NDUFS1	60.5701	54.8886	-0.142065	0.155329	HL60
ENSG00000023287	RB1CC1	18.0754	16.0717	-0.169362	0.488869	HL60
ENSG00000023318	ERP44	84.3951	87.4328	0.0510076	0.668678	HL60
ENSG00000023330	ALAS1	131.765	115.223	-0.193516	0.125544	HL60
ENSG00000023445	BIRC3	1.26637	1.9442	0.612934	0.210843	HL60
ENSG00000023516	AKAP11	9.58322	8.91063	-0.104824	0.295018	HL60
ENSG00000023572	GLRX2	24.8042	20.0054	-0.309994	0.140069	HL60
ENSG00000023608	SNAPC1	8.05329	24.1239	1.58113	0.0405526	HL60
ENSG00000023697	DERA	39.3501	37.1638	-0.0824392	0.187864	HL60
ENSG00000023734	STRAP	153.55	165.607	0.109046	0.740259	HL60
ENSG00000023839	ABCC2	0.190143	0.228199	0.246512	0.747669	HL60
ENSG00000023892	DEF6	39.0505	42.9656	0.137795	0.0409734	HL60
ENSG00000023902	PLEKHO1	15.3636	9.04427	-0.763515	0.923429	HL60
ENSG00000023909	GCLM	10.7542	9.23663	-0.219147	0.182581	HL60
ENSG00000024048	UBR2	9.46444	9.74246	0.0417081	0.756871	HL60
ENSG00000024422	EHD2	0.484859	0.532464	0.131474	0.388843	HL60
ENSG00000024526	DEPDC1	13.6827	11.8585	-0.206202	0.846735	HL60
ENSG00000024862	CCDC28A	22.2453	22.2669	0.00140178	0.465672	HL60
ENSG00000025039	RRAGD	26.2573	23.8196	-0.140489	0.129132	HL60
ENSG00000025156	HSF2	17.2222	17.7561	0.0440082	0.535473	HL60
ENSG00000025293	PHF20	13.7717	14.8981	0.113311	0.341496	HL60
ENSG00000025423	HSD17B6	0.669105	0.934529	0.473533	0.361673	HL60
ENSG00000025434	NR1H3	3.36378	3.72727	0.147447	0.247305	HL60
ENSG00000025708	TYMP	11.1424	11.6222	0.0607497	0.628347	HL60
ENSG00000025770	NCAPH2	62.405	61.103	-0.0304119	0.723337	HL60
ENSG00000025772	TOMM34	35.0909	36.8645	0.071107	0.308626	HL60
ENSG00000025796	SEC63	92.7233	102.918	0.150465	0.9399	HL60
ENSG00000025800	KPNA6	17.8735	15.3002	-0.224078	0.0040174	HL60
ENSG00000026025	VIM	243.288	223.222	-0.12418	0.359636	HL60
ENSG00000026036	RTEL1-TNFRSF6B	2.44334	3.64444	0.574114	0.0795486	HL60
ENSG00000026103	FAS	4.94674	4.71611	-0.06868	0.396392	HL60
ENSG00000026297	RNASET2	181.124	190.59	0.0734882	0.622596	HL60
ENSG00000026508	CD44	166.567	178.484	0.0996885	0.146425	HL60
ENSG00000026559	KCNG1	0	0	0	0.82465	HL60
ENSG00000026652	AGPAT4	0.494556	0.565064	0.187287	0.427145	HL60
ENSG00000026751	SLAMF7	0.598951	0.558553	-0.0983471	0.738617	HL60
ENSG00000026950	BTN3A1	5.29465	4.90084	-0.111199	0.409069	HL60
ENSG00000027001	MIPEP	12.7032	11.7189	-0.116226	0.301594	HL60
ENSG00000027075	PRKCH	0.814562	1.0106	0.306343	0.386629	HL60
ENSG00000027644	INSRR	0	0	0	NA	HL60
ENSG00000027697	IFNGR1	58.5546	52.4206	-0.159609	0.235871	HL60
ENSG00000027847	B4GALT7	18.1207	14.9416	-0.278062	0.191921	HL60
ENSG00000027869	SH2D2A	0.418315	0.684597	0.692263	0.353763	HL60
ENSG00000028116	VRK2	17.1794	17.9625	0.0642551	0.438119	HL60
ENSG00000028137	TNFRSF1B	76.7228	56.6502	-0.43748	0.119977	HL60
ENSG00000028203	VEZT	31.8164	32.525	0.0317636	0.271669	HL60
ENSG00000028277	POU2F2	3.62674	3.85617	0.0881613	0.865165	HL60
ENSG00000028310	BRD9	45.1934	48.1761	0.0921775	0.0435712	HL60
ENSG00000028528	SNX1	48.9332	45.868	-0.0932969	0.66876	HL60
ENSG00000028839	TBPL1	17.4742	18.0169	0.0440886	0.693049	HL60
ENSG00000029153	ARNTL2	5.90641	5.59631	-0.0776156	0.984815	HL60
ENSG00000029363	BCLAF1	120.371	128.016	0.0888282	0.883954	HL60
ENSG00000029364	SLC39A9	13.291	13.3225	0.0034074	0.465194	HL60
ENSG00000029534	ANK1	0.465464	0	-5.08902	0.168997	HL60
ENSG00000029559	IBSP	0	0	0	NA	HL60
ENSG00000029639	TFB1M	18.6245	13.931	-0.418537	0.0144052	HL60
ENSG00000029725	RABEP1	23.1859	21.1434	-0.132958	0.101623	HL60
ENSG00000029993	HMGB3	114.65	112.774	-0.0237933	0.225855	HL60
ENSG00000030066	NUP160	52.6316	48.9271	-0.105267	0.381651	HL60
ENSG00000030110	BAK1	33.8258	34.1646	0.0143736	0.596892	HL60
ENSG00000030304	MUSK	0	0	0	NA	HL60
ENSG00000030419	IKZF2	0.522894	0.597664	0.188073	0.422513	HL60
ENSG00000030582	GRN	309.696	303.95	-0.0270157	0.523925	HL60
ENSG00000031003	FAM13B	12.8778	14.4365	0.164656	0.275846	HL60
ENSG00000031081	ARHGAP31	0.0855645	0.0939289	0.116278	0.998655	HL60
ENSG00000031544	NR2E3	0	0	0	NA	HL60
ENSG00000031691	CENPQ	19.7654	19.712	-0.00389613	0.417296	HL60
ENSG00000031698	SARS	56.5345	53.2344	-0.0867495	0.0956863	HL60
ENSG00000031823	RANBP3	36.0036	33.078	-0.122221	0.837969	HL60
ENSG00000032219	ARID4A	14.1467	14.8655	0.0714407	0.644383	HL60
ENSG00000032389	TSSC1	37.6579	35.8272	-0.0718669	0.756004	HL60
ENSG00000032444	PNPLA6	16.7896	17.8104	0.0850776	0.453169	HL60
ENSG00000032742	IFT88	4.30554	4.05325	-0.0868239	0.17811	HL60
ENSG00000033011	ALG1	31.392	28.4814	-0.140311	0.155874	HL60
ENSG00000033030	ZCCHC8	19.0937	23.3518	0.290243	0.105247	HL60
ENSG00000033050	ABCF2	68.5008	62.9447	-0.122011	0.0719102	HL60
ENSG00000033100	CHPF2	27.0954	23.0618	-0.232412	0.00533489	HL60
ENSG00000033122	LRRC7	0	0	0	0.42265	HL60
ENSG00000033170	FUT8	2.77017	2.05379	-0.429144	0.730311	HL60
ENSG00000033178	UBA6	20.1022	19.8394	-0.0189749	0.374808	HL60
ENSG00000033327	GAB2	16.344	19.8642	0.281185	0.859729	HL60
ENSG00000033627	ATP6V0A1	9.92021	10.6233	0.0986488	0.62896	HL60
ENSG00000033800	PIAS1	23.9132	23.6633	-0.0151464	0.523223	HL60
ENSG00000033867	SLC4A7	12.3023	15.5827	0.340676	0.143291	HL60
ENSG00000034053	APBA2	0	0	0	0.800678	HL60
ENSG00000034063	UHRF1	82.7979	67.2198	-0.300652	0.416671	HL60
ENSG00000034152	MAP2K3	72.5111	95.2242	0.393059	0.675634	HL60
ENSG00000034239	EFCAB1	0	0	0	NA	HL60
ENSG00000034510	TMSB10	982.755	1041.15	0.0832786	0.928829	HL60
ENSG00000034533	ASTE1	5.42163	4.53138	-0.258041	0.924086	HL60
ENSG00000034677	RNF19A	14.0803	14.995	0.0907174	0.255389	HL60
ENSG00000034693	PEX3	18.3955	17.6911	-0.0562872	0.334963	HL60
ENSG00000034713	GABARAPL2	54.8594	57.9714	0.0795837	0.314353	HL60
ENSG00000034971	MYOC	0	0	0	NA	HL60
ENSG00000035115	SH3YL1	4.84781	5.60717	0.209376	0.445163	HL60
ENSG00000035141	FAM136A	86.2272	86.1397	-0.00146544	0.484942	HL60
ENSG00000035403	VCL	45.159	37.6528	-0.262166	0.0136896	HL60
ENSG00000035499	DEPDC1B	11.0473	12.5997	0.189464	0.353926	HL60
ENSG00000035664	DAPK2	0.672757	0.730416	0.116295	0.392875	HL60
ENSG00000035681	NSMAF	47.6784	44.7809	-0.0904237	0.688743	HL60
ENSG00000035687	ADSS	79.6429	76.8333	-0.0518036	0.2747	HL60
ENSG00000035720	STAP1	1.00914	1.10637	0.130962	0.442517	HL60
ENSG00000035862	TIMP2	9.76505	10.8703	0.154482	0.403746	HL60
ENSG00000035928	RFC1	43.4667	38.3254	-0.18155	0.577586	HL60
ENSG00000036054	TBC1D23	21.072	20.2119	-0.0600772	0.156163	HL60
ENSG00000036257	CUL3	63.0325	61.5268	-0.0348728	0.427899	HL60
ENSG00000036448	MYOM2	0.057043	0.0644485	0.142882	0.414372	HL60
ENSG00000036473	OTC	0	0	0	NA	HL60
ENSG00000036530	CYP46A1	0.203641	0.228199	0.154185	0.400041	HL60
ENSG00000036549	ZZZ3	34.7772	34.1429	-0.0265447	0.619825	HL60
ENSG00000036565	SLC18A1	0	0	0	0.42265	HL60
ENSG00000036672	USP2	2.7306	1.97642	-0.463506	0.570377	HL60
ENSG00000036828	CASR	0.126063	0.0966727	-0.339534	0.475483	HL60
ENSG00000037042	TUBG2	1.15037	1.03233	-0.154197	0.463903	HL60
ENSG00000037241	RPL26L1	66.6927	65.9952	-0.0151646	0.677378	HL60
ENSG00000037280	FLT4	0.427822	0.456398	0.0903979	0.735922	HL60
ENSG00000037474	NSUN2	91.5025	93.4932	0.0310463	0.913674	HL60
ENSG00000037637	FBXO42	12.4706	11.6381	-0.0995484	0.0801066	HL60
ENSG00000037749	MFAP3	14.9643	12.2577	-0.287532	0.0144941	HL60
ENSG00000037757	MRI1	34.2638	31.5475	-0.119108	0.938137	HL60
ENSG00000037897	METTL1	44.4935	46.6178	0.0672647	0.399148	HL60
ENSG00000037965	HOXC8	0	0	0	0.42265	HL60
ENSG00000038002	AGA	22.2453	20.364	-0.127393	0.232499	HL60
ENSG00000038210	PI4K2B	32.3719	33.0513	0.0299538	0.480662	HL60
ENSG00000038219	BOD1L1	18.8907	17.7556	-0.0893394	0.27121	HL60
ENSG00000038274	MAT2B	56.3775	49.4642	-0.188684	0.0229382	HL60
ENSG00000038295	TLL1	0	0	0	NA	HL60
ENSG00000038358	EDC4	44.8263	40.6086	-0.142514	0.0644913	HL60
ENSG00000038382	TRIO	0.445207	0.391198	-0.180478	0.432762	HL60
ENSG00000038427	VCAN	0.988745	0.977468	-0.0163142	0.485395	HL60
ENSG00000038532	CLEC16A	8.59169	8.22603	-0.0626411	0.285076	HL60
ENSG00000038945	MSR1	0.853351	1.02043	0.25413	0.505729	HL60
ENSG00000039068	CDH1	0.242429	0.236311	-0.0348265	0.439807	HL60
ENSG00000039123	SKIV2L2	34.8128	31.2468	-0.155846	0.888793	HL60
ENSG00000039139	DNAH5	0	0	0	NA	HL60
ENSG00000039319	ZFYVE16	2.61188	3.14045	0.264581	0.138965	HL60
ENSG00000039523	FAM65A	7.31167	7.93263	0.117382	0.713844	HL60
ENSG00000039537	C6	0	0	0	NA	HL60
ENSG00000039560	RAI14	1.0586	1.44526	0.44409	0.438265	HL60
ENSG00000039600	SOX30	0	0	0	0.42265	HL60
ENSG00000039650	PNKP	26.3919	30.9699	0.230657	0.533055	HL60
ENSG00000039987	BEST2	0	0.103322	3.05889	0.198012	HL60
ENSG00000040199	PHLPP2	0.88052	1.02043	0.209637	0.364465	HL60
ENSG00000040275	SPDL1	23.9229	21.5594	-0.149985	0.0444379	HL60
ENSG00000040341	STAU2	29.7479	32.4176	0.123932	0.598947	HL60
ENSG00000040487	PQLC2	23.9917	22.3635	-0.101327	0.420967	HL60
ENSG00000040531	CTNS	4.87749	5.45504	0.161012	0.22671	HL60
ENSG00000040608	RTN4R	0.223035	0.268535	0.253244	0.428373	HL60
ENSG00000040633	PHF23	18.9262	15.8436	-0.25628	0.942132	HL60
ENSG00000040731	CDH10	0	0	0	0.42265	HL60
ENSG00000040933	INPP4A	12.7396	13.2549	0.0571445	0.615189	HL60
ENSG00000041353	RAB27B	0	0	0	0.463041	HL60
ENSG00000041357	PSMA4	195.689	197.175	0.0109124	0.632099	HL60
ENSG00000041515	MYO16	0.0950716	0	-2.95378	0.183543	HL60
ENSG00000041802	LSG1	26.0272	23.3958	-0.153681	0.0840444	HL60
ENSG00000041880	PARP3	1.63882	1.29313	-0.338511	0.488694	HL60
ENSG00000041982	TNC	0.19965	0.193345	-0.0431975	0.500058	HL60
ENSG00000041988	THAP3	9.31966	7.05244	-0.401456	0.427338	HL60
ENSG00000042062	FAM65C	0	0	0	0.945996	HL60
ENSG00000042088	TDP1	34.9103	27.2617	-0.356614	0.00523367	HL60
ENSG00000042286	AIFM2	0.465464	0.638716	0.444962	0.118047	HL60
ENSG00000042304	C2orf83	0	0	0	0.42265	HL60
ENSG00000042317	SPATA7	3.29453	3.27613	-0.00804507	0.681432	HL60
ENSG00000042429	MED17	23.6256	26.6993	0.176349	0.193032	HL60
ENSG00000042445	RETSAT	12.2072	13.1045	0.102219	0.252436	HL60
ENSG00000042493	CAPG	76.932	75.5121	-0.0268696	0.429012	HL60
ENSG00000042753	AP2S1	144.92	152.367	0.072289	0.777103	HL60
ENSG00000042781	USH2A	0	0	0	NA	HL60
ENSG00000042813	ZPBP	0	0	0	0.42265	HL60
ENSG00000042832	TG	1.17889	1.16007	-0.0229355	0.966991	HL60
ENSG00000042980	ADAM28	0.989111	0.805606	-0.291451	0.504815	HL60
ENSG00000043039	BARX2	0	0	0	NA	HL60
ENSG00000043093	DCUN1D1	24.6711	22.4396	-0.136692	0.0644786	HL60
ENSG00000043143	PHF15	9.03776	6.49824	-0.47504	0.795819	HL60
ENSG00000043355	ZIC2	0	0.0322242	1.71683	0.149437	HL60
ENSG00000043462	LCP2	59.3952	60.9038	0.0361784	0.49243	HL60
ENSG00000043514	TRIT1	23.1507	23.8782	0.044606	0.669413	HL60
ENSG00000043591	ADRB1	0.416978	0.204087	-0.982421	0.117625	HL60
ENSG00000044012	GUCA2B	0	0	0	NA	HL60
ENSG00000044090	CUL7	4.96495	5.40071	0.12104	0.314197	HL60
ENSG00000044115	CTNNA1	3.92735	4.61831	0.233036	0.411503	HL60
ENSG00000044446	PHKA2	19.8661	19.646	-0.0160594	0.380956	HL60
ENSG00000044459	CNTLN	4.63949	5.15588	0.151813	0.0466741	HL60
ENSG00000044524	EPHA3	0	0	0	0.42265	HL60
ENSG00000044574	HSPA5	317.262	368.352	0.215398	0.000712635	HL60
ENSG00000046604	DSG2	0.320007	0.290018	-0.135681	0.385904	HL60
ENSG00000046647	GEMIN8	10.7542	8.50056	-0.338764	0.0128073	HL60
ENSG00000046651	OFD1	15.8549	13.5941	-0.221729	0.0661154	HL60
ENSG00000046653	GPM6B	1.89955	1.81473	-0.0654091	0.358431	HL60
ENSG00000046774	MAGEC2	0	0	0	NA	HL60
ENSG00000046889	PREX2	0	0	0	0.42265	HL60
ENSG00000047056	WDR37	6.14385	4.87911	-0.33167	0.722158	HL60
ENSG00000047188	YTHDC2	6.19867	6.51997	0.0727457	0.40321	HL60
ENSG00000047230	CTPS2	9.09595	8.78235	-0.0505369	0.838837	HL60
ENSG00000047249	ATP6V1H	24.0975	27.5681	0.194014	0.00564295	HL60
ENSG00000047315	POLR2B	79.613	70.6157	-0.172981	0.0367203	HL60
ENSG00000047346	FAM214A	3.73631	4.68351	0.324878	0.310686	HL60
ENSG00000047365	ARAP2	2.13911	2.95876	0.465363	0.0546294	HL60
ENSG00000047410	TPR	48.6577	44.7702	-0.120092	0.00424856	HL60
ENSG00000047457	CP	0.178083	0	-3.76972	0.597665	HL60
ENSG00000047578	KIAA0556	4.80112	4.87911	0.023181	0.718655	HL60
ENSG00000047579	DTNBP1	20.4119	17.4978	-0.222073	0.0799705	HL60
ENSG00000047597	XK	0.833957	0.847596	0.023019	0.42552	HL60
ENSG00000047617	ANO2	0	0	0	NA	HL60
ENSG00000047621	C12orf4	14.3421	13.8672	-0.0485366	0.401201	HL60
ENSG00000047634	SCML1	1.80636	2.3094	0.352	0.804051	HL60
ENSG00000047644	WWC3	2.15813	2.56452	0.247427	0.33064	HL60
ENSG00000047648	ARHGAP6	0	0	0	NA	HL60
ENSG00000047662	FAM184B	0.0290915	0.0325999	0.112697	0.422639	HL60
ENSG00000047849	MAP4	40.1463	35.307	-0.185242	0.860892	HL60
ENSG00000047932	GOPC	20.0506	19.6794	-0.0269371	0.563405	HL60
ENSG00000047936	ROS1	0	0	0	NA	HL60
ENSG00000048028	USP28	8.86456	7.5727	-0.226852	0.0452874	HL60
ENSG00000048052	HDAC9	16.9894	15.3065	-0.150361	0.3131	HL60
ENSG00000048140	TSPAN17	6.74923	6.6069	-0.0306839	0.638181	HL60
ENSG00000048162	NOP16	146.582	167.91	0.195956	0.665097	HL60
ENSG00000048342	CC2D2A	0.465464	0.565064	0.272254	0.408072	HL60
ENSG00000048392	RRM2B	19.3813	16.6694	-0.217296	0.0827228	HL60
ENSG00000048405	ZNF800	22.7031	32.9654	0.537784	0.0953714	HL60
ENSG00000048462	TNFRSF17	0	0	0	NA	HL60
ENSG00000048471	SNX29	3.87824	3.60911	-0.10337	0.406081	HL60
ENSG00000048540	LMO3	0	0	0	0.42265	HL60
ENSG00000048544	MRPS10	74.4355	70.1223	-0.0861006	0.292582	HL60
ENSG00000048545	GUCA1A	0	0	0	NA	HL60
ENSG00000048649	RSF1	14.2037	16.9607	0.255696	0.0262808	HL60
ENSG00000048707	VPS13D	5.96099	7.08503	0.248683	0.245181	HL60
ENSG00000048740	CELF2	43.771	38.8732	-0.171141	0.861003	HL60
ENSG00000048828	FAM120A	73.8802	71.9675	-0.0378348	0.370626	HL60
ENSG00000048991	R3HDM1	30.1947	29.644	-0.0265471	0.986255	HL60
ENSG00000049089	COL9A2	4.51888	4.26434	-0.0833754	0.426025	HL60
ENSG00000049130	KITLG	0.332751	0.402065	0.262848	0.345066	HL60
ENSG00000049167	ERCC8	6.27407	7.29342	0.216742	0.154852	HL60
ENSG00000049192	ADAMTS6	0.126063	0	-3.31432	0.868938	HL60
ENSG00000049239	H6PD	2.68113	1.86906	-0.517259	0.247436	HL60
ENSG00000049245	VAMP3	32.0395	30.613	-0.0656743	0.153123	HL60
ENSG00000049246	PER3	2.54792	2.58868	0.0227722	0.683605	HL60
ENSG00000049247	UTS2	0	0	0	0.468754	HL60
ENSG00000049249	TNFRSF9	0.361272	0.402065	0.148838	0.986931	HL60
ENSG00000049283	EPN3	0	0	0	0.42265	HL60
ENSG00000049319	SRD5A2	0.108828	0	-3.12502	0.437757	HL60
ENSG00000049323	LTBP1	0.306698	0.322242	0.0682678	0.992229	HL60
ENSG00000049449	RCN1	18.9386	17.7341	-0.094731	0.453165	HL60
ENSG00000049540	ELN	1.48402	2.02119	0.442082	0.19779	HL60
ENSG00000049541	RFC2	84.0454	78.133	-0.105218	0.0397536	HL60
ENSG00000049618	ARID1B	15.7999	14.125	-0.161516	0.131903	HL60
ENSG00000049656	CLPTM1L	78.3105	77.6711	-0.0118246	0.555885	HL60
ENSG00000049759	NEDD4L	0.572133	0.695464	0.275462	0.414222	HL60
ENSG00000049768	FOXP3	0.408808	0.432073	0.0772609	0.572396	HL60
ENSG00000049769	PPP1R3F	0.541908	0.77153	0.498752	0.303311	HL60
ENSG00000049860	HEXB	30.0806	29.3992	-0.0330397	0.957295	HL60
ENSG00000049883	PTCD2	3.86941	3.6843	-0.0704602	0.57259	HL60
ENSG00000050030	KIAA2022	0	0	0	0.591745	HL60
ENSG00000050130	JKAMP	25.6781	25.906	0.0127414	0.672609	HL60
ENSG00000050165	DKK3	0	0	0	0.92544	HL60
ENSG00000050327	ARHGEF5	0.138509	0	-3.43706	0.650557	HL60
ENSG00000050344	NFE2L3	3.30674	3.52078	0.0901172	0.40045	HL60
ENSG00000050393	CCDC90A	26.8612	27.8729	0.0533127	0.717806	HL60
ENSG00000050405	LIMA1	9.85893	12.79	0.375043	0.456158	HL60
ENSG00000050426	LETMD1	57.1551	59.6041	0.0605141	0.340714	HL60
ENSG00000050438	SLC4A8	0.532401	0.591752	0.148744	0.587459	HL60
ENSG00000050555	LAMC3	0	0	0	0.42265	HL60
ENSG00000050628	PTGER3	0	0	0	0.42265	HL60
ENSG00000050730	TNIP3	0	0	0	0.968085	HL60
ENSG00000050748	MAPK9	24.3098	23.787	-0.0313455	0.628382	HL60
ENSG00000050767	COL23A1	61.0922	56.1152	-0.122566	0.368373	HL60
ENSG00000050820	BCAR1	0.603502	0	-5.45398	0.811444	HL60
ENSG00000051009	FAM160A2	12.9868	12.2989	-0.0784254	0.127218	HL60
ENSG00000051108	HERPUD1	40.5245	50.3016	0.311713	0.720883	HL60
ENSG00000051128	HOMER3	106.899	97.7018	-0.129768	0.304713	HL60
ENSG00000051180	RAD51	33.8951	31.5368	-0.103995	0.253533	HL60
ENSG00000051341	POLQ	11.3748	16.3377	0.521823	0.158559	HL60
ENSG00000051382	PIK3CB	46.0242	43.4515	-0.0829596	0.532044	HL60
ENSG00000051523	CYBA	215.518	225.409	0.0647306	0.307092	HL60
ENSG00000051596	THOC3	97.7575	89.0954	-0.133836	0.0575481	HL60
ENSG00000051620	HEBP2	83.7486	84.2019	0.00778709	0.46946	HL60
ENSG00000051825	MPHOSPH9	28.7715	32.6216	0.181103	0.228398	HL60
ENSG00000052126	PLEKHA5	0.405633	0.488998	0.261374	0.416289	HL60
ENSG00000052344	PRSS8	0.290915	0.247052	-0.223997	0.566515	HL60
ENSG00000052723	SIKE1	24.0781	18.1473	-0.407693	0.0194218	HL60
ENSG00000052749	RRP12	39.9717	51.3977	0.362609	0.536008	HL60
ENSG00000052795	FNIP2	4.87768	5.17736	0.0857821	0.924523	HL60
ENSG00000052802	MSMO1	46.9654	76.8813	0.710867	0.377499	HL60
ENSG00000052841	TTC17	37.4699	48.9056	0.384143	0.159524	HL60
ENSG00000052850	ALX4	0	0	0	NA	HL60
ENSG00000053108	FSTL4	0.247186	0.338144	0.430959	0.20225	HL60
ENSG00000053254	FOXN3	23.5059	23.9211	0.0252448	0.502093	HL60
ENSG00000053328	METTL24	0	0	0	NA	HL60
ENSG00000053371	AKR7A2	101.181	103.171	0.028104	0.47122	HL60
ENSG00000053372	MRTO4	157.572	154.709	-0.0264531	0.352561	HL60
ENSG00000053438	NNAT	0	0	0	0.42265	HL60
ENSG00000053501	USE1	47.2155	49.4322	0.0661719	0.811257	HL60
ENSG00000053524	MCF2L2	0.213338	0.293399	0.435126	0.350416	HL60
ENSG00000053702	NRIP2	0.484781	0.365208	-0.395335	0.267747	HL60
ENSG00000053747	LAMA3	0	0	0	0.572113	HL60
ENSG00000053770	AP5M1	26.1145	20.1576	-0.373298	0.0533711	HL60
ENSG00000053900	ANAPC4	20.3014	18.7992	-0.110826	0.102175	HL60
ENSG00000053918	KCNQ1	1.21692	1.22793	0.0128473	0.755442	HL60
ENSG00000054116	TRAPPC3	75.7911	76.5445	0.0142669	0.633074	HL60
ENSG00000054118	THRAP3	93.2272	62.3309	-0.580695	0.00490364	HL60
ENSG00000054148	PHPT1	79.9647	81.667	0.0303832	0.464759	HL60
ENSG00000054179	ENTPD2	0	0	0	0.42265	HL60
ENSG00000054219	LY75	10.9523	11.6599	0.0902133	0.360783	HL60
ENSG00000054267	ARID4B	14.7931	16.9714	0.198003	0.0365688	HL60
ENSG00000054277	OPN3	9.69561	20.853	1.10373	0.186427	HL60
ENSG00000054282	SDCCAG8	13.0815	14.8329	0.181095	0.386086	HL60
ENSG00000054356	PTPRN	0	0	0	0.42265	HL60
ENSG00000054392	HHAT	0.465464	0.586797	0.325401	0.396325	HL60
ENSG00000054523	KIF1B	2.47337	2.79272	0.174258	0.138529	HL60
ENSG00000054598	FOXC1	0.0678802	0.173866	1.19723	0.348762	HL60
ENSG00000054611	TBC1D22A	23.3781	22.1896	-0.0752259	0.35857	HL60
ENSG00000054654	SYNE2	3.03278	4.43358	0.54572	0.0101516	HL60
ENSG00000054690	PLEKHH1	0.756379	0.84536	0.157676	0.193528	HL60
ENSG00000054793	ATP9A	0.058183	0.0859313	0.468782	0.42061	HL60
ENSG00000054796	SPO11	0	0	0	NA	HL60
ENSG00000054803	CBLN4	0	0	0	NA	HL60
ENSG00000054938	CHRDL2	0.44607	0.526329	0.231944	0.364177	HL60
ENSG00000054965	FAM168A	7.43773	7.16452	-0.0538879	0.592568	HL60
ENSG00000054967	RELT	25.9165	37.2405	0.522761	0.121452	HL60
ENSG00000054983	GALC	9.58322	10.3559	0.111711	0.0608539	HL60
ENSG00000055044	NOP58	157.288	184.516	0.230317	0.266836	HL60
ENSG00000055070	SZRD1	116.773	131.758	0.174157	0.612156	HL60
ENSG00000055118	KCNH2	0.104579	0.0977996	-0.0848655	0.459721	HL60
ENSG00000055130	CUL1	42.5124	36.338	-0.226324	0.888023	HL60
ENSG00000055147	FAM114A2	16.0291	14.0179	-0.193235	0.0537513	HL60
ENSG00000055163	CYFIP2	5.21708	5.19424	-0.00631118	0.44763	HL60
ENSG00000055208	TAB2	35.0909	40.7637	0.216105	0.912574	HL60
ENSG00000055211	GINM1	27.0745	30.6547	0.179087	0.768241	HL60
ENSG00000055332	EIF2AK2	10.793	9.23761	-0.22418	0.851264	HL60
ENSG00000055483	USP36	72.5492	91.592	0.336205	0.0478482	HL60
ENSG00000055609	MLL3	15.8865	19.9468	0.328099	0.0716927	HL60
ENSG00000055732	MCOLN3	0	0	0	0.42265	HL60
ENSG00000055813	CCDC85A	0	0	0	NA	HL60
ENSG00000055917	PUM2	58.5166	59.6578	0.0278587	0.431457	HL60
ENSG00000055950	MRPL43	51.9376	45.8354	-0.180266	0.139951	HL60
ENSG00000055955	ITIH4	0.920094	0.816347	-0.169835	0.506099	HL60
ENSG00000055957	ITIH1	0.415526	0.432073	0.0545219	0.422063	HL60
ENSG00000056050	C4orf27	20.8683	14.9198	-0.483696	0.00381574	HL60
ENSG00000056097	ZFR	102.48	106.841	0.0601137	0.542877	HL60
ENSG00000056277	ZNF280C	5.64918	6.15483	0.123383	0.126485	HL60
ENSG00000056291	NPFFR2	0	0.0751899	2.66372	0.484914	HL60
ENSG00000056487	PHF21B	0	0	0	NA	HL60
ENSG00000056558	TRAF1	1.35541	1.81473	0.417263	0.0482662	HL60
ENSG00000056586	RC3H2	11.4276	11.9571	0.065271	0.162544	HL60
ENSG00000056661	PCGF2	0.323244	0.358598	0.143795	0.422842	HL60
ENSG00000056736	IL17RB	0	0	0	0.42265	HL60
ENSG00000056972	TRAF3IP2	11.4665	9.36702	-0.291371	0.682168	HL60
ENSG00000056998	GYG2	0.475161	0	-5.1179	0.133049	HL60
ENSG00000057019	DCBLD2	1.85216	2.21273	0.254844	0.325604	HL60
ENSG00000057149	SERPINB3	0	0	0	NA	HL60
ENSG00000057252	SOAT1	11.4718	10.2903	-0.156601	0.860224	HL60
ENSG00000057294	PKP2	0.118722	0.159679	0.38779	0.0844991	HL60
ENSG00000057468	MSH4	0.0475358	0.0322242	-0.412084	0.363481	HL60
ENSG00000057593	F7	0	0	0	NA	HL60
ENSG00000057608	GDI2	147.627	140.498	-0.0714055	0.612209	HL60
ENSG00000057657	PRDM1	1.34551	3.71653	1.45623	0.0535939	HL60
ENSG00000057663	ATG5	33.9304	33.4583	-0.0202051	0.539443	HL60
ENSG00000057704	TMCC3	0	0	0	0.42265	HL60
ENSG00000057757	PITHD1	55.5745	54.8221	-0.0196603	0.37064	HL60
ENSG00000057935	MTA3	4.22118	4.14619	-0.025775	0.510814	HL60
ENSG00000058056	USP13	10.9125	11.6652	0.0961046	0.70608	HL60
ENSG00000058063	ATP11B	35.5188	37.1856	0.0661361	0.668639	HL60
ENSG00000058085	LAMC2	0	0	0	0.877755	HL60
ENSG00000058091	CDK14	9.97263	10.2364	0.0376036	0.514128	HL60
ENSG00000058262	SEC61A1	162.905	156.827	-0.0548537	0.156552	HL60
ENSG00000058272	PPP1R12A	33.7268	31.9127	-0.0797271	0.164546	HL60
ENSG00000058335	RASGRF1	0.193943	0.184733	-0.0653343	0.71162	HL60
ENSG00000058404	CAMK2B	0.785471	0.934529	0.246621	0.180246	HL60
ENSG00000058453	CROCC	0.541908	0.684597	0.329566	0.380288	HL60
ENSG00000058600	POLR3E	38.4659	32.8715	-0.22665	0.120686	HL60
ENSG00000058668	ATP2B4	22.2087	22.0629	-0.00950102	0.459007	HL60
ENSG00000058673	ZC3H11A	52.2484	60.0123	0.199822	0.0306464	HL60
ENSG00000058729	RIOK2	16.4755	14.3439	-0.199697	0.780958	HL60
ENSG00000058799	YIPF1	14.9833	15.0272	0.00422149	0.928316	HL60
ENSG00000058804	TMEM48	44.522	39.7003	-0.165316	0.0442062	HL60
ENSG00000058866	DGKG	10.3081	12.627	0.292374	0.791718	HL60
ENSG00000059122	FLYWCH1	11.1234	10.3016	-0.110588	0.818142	HL60
ENSG00000059145	UNKL	4.68373	4.4362	-0.0780921	0.590968	HL60
ENSG00000059377	TBXAS1	15.4185	17.2562	0.162311	0.0103726	HL60
ENSG00000059378	PARP12	1.0279	0.923663	-0.152062	0.436159	HL60
ENSG00000059573	ALDH18A1	73.0245	69.09	-0.0798889	0.275083	HL60
ENSG00000059588	TARBP1	19.4234	23.5588	0.278286	0.0687035	HL60
ENSG00000059691	PET112	32.2429	30.4917	-0.0805254	0.292866	HL60
ENSG00000059728	MXD1	8.32987	22.0158	1.40066	0.0538235	HL60
ENSG00000059758	CDK17	10.9093	14.8221	0.441695	0.0987853	HL60
ENSG00000059769	DNAJC25	6.57917	7.29342	0.148389	0.22169	HL60
ENSG00000059804	SLC2A3	16.3688	41.9777	1.35792	0.0367716	HL60
ENSG00000059915	PSD	0.128615	0.128897	0.00284484	0.96235	HL60
ENSG00000060069	CTDP1	73.1671	41.5322	-0.816753	0.0130322	HL60
ENSG00000060138	CSDA	198.295	210.432	0.0856998	0.979751	HL60
ENSG00000060140	STYK1	0.694023	1.02146	0.548349	0.282178	HL60
ENSG00000060237	WNK1	29.6623	26.7536	-0.148824	0.320476	HL60
ENSG00000060339	CCAR1	48.3307	49.1742	0.0249541	0.441262	HL60
ENSG00000060491	OGFR	30.1662	17.0037	-0.826568	0.266581	HL60
ENSG00000060558	GNA15	71.2063	68.764	-0.0503426	0.385681	HL60
ENSG00000060566	CREB3L3	0	0	0	0.42265	HL60
ENSG00000060642	PIGV	6.52191	5.34922	-0.285284	0.0308246	HL60
ENSG00000060656	PTPRU	0.252126	0.271665	0.102182	0.432458	HL60
ENSG00000060688	SNRNP40	76.9795	70.2962	-0.131003	0.171086	HL60
ENSG00000060709	RIMBP2	0.178083	0	-3.76972	0.187742	HL60
ENSG00000060718	COL11A1	0	0	0	0.42265	HL60
ENSG00000060749	QSER1	10.2402	11.5403	0.172218	0.0317454	HL60
ENSG00000060762	MPC1	94.6347	91.7961	-0.0439294	0.384789	HL60
ENSG00000060971	ACAA1	61.1311	59.3356	-0.0429983	0.238787	HL60
ENSG00000060982	BCAT1	26.752	22.5677	-0.245245	0.285106	HL60
ENSG00000061273	HDAC7	12.7966	12.3988	-0.0455123	0.452314	HL60
ENSG00000061337	LZTS1	0	0	0	0.42265	HL60
ENSG00000061455	PRDM6	0	0	0	0.461296	HL60
ENSG00000061492	WNT8A	0	0	0	NA	HL60
ENSG00000061656	SPAG4	2.27221	2.72832	0.262428	0.468834	HL60
ENSG00000061676	NCKAP1	0.0395739	0	-1.92933	0.429229	HL60
ENSG00000061794	MRPS35	84.3945	88.7259	0.0721956	0.63506	HL60
ENSG00000061918	GUCY1B3	0	0	0	0.42265	HL60
ENSG00000061936	SFSWAP	33.6378	27.5732	-0.286685	0.808348	HL60
ENSG00000061938	TNK2	18.0351	19.0383	0.0780401	0.215858	HL60
ENSG00000061987	MON2	8.25222	9.80169	0.24786	0.00153444	HL60
ENSG00000062038	CDH3	0.356165	0.397432	0.15245	0.654917	HL60
ENSG00000062096	ARSF	0	0	0	NA	HL60
ENSG00000062194	GPBP1	25.1545	26.6123	0.0812373	0.430382	HL60
ENSG00000062282	DGAT2	13.4551	15.0068	0.157303	0.232347	HL60
ENSG00000062370	ZNF112	2.83943	1.66259	-0.767133	0.00294186	HL60
ENSG00000062485	CS	202.448	215.559	0.0905243	0.515184	HL60
ENSG00000062524	LTK	0.161622	0.195599	0.255042	0.315407	HL60
ENSG00000062582	MRPS24	132.787	186.145	0.487275	0.0352477	HL60
ENSG00000062598	ELMO2	21.2465	18.0712	-0.233366	0.0367805	HL60
ENSG00000062650	WAPAL	37.6293	32.1705	-0.226027	0.779547	HL60
ENSG00000062716	VMP1	48.1348	54.4635	0.178161	0.0439239	HL60
ENSG00000062725	APPBP2	6.5029	5.58544	-0.218899	0.683105	HL60
ENSG00000062822	POLD1	81.8635	69.0356	-0.245833	0.305105	HL60
ENSG00000063015	SEZ6	0	0	0	0.42265	HL60
ENSG00000063046	EIF4B	484.808	476.469	-0.0250322	0.852698	HL60
ENSG00000063127	SLC6A16	0	0.64113	5.5393	0.38863	HL60
ENSG00000063169	GLTSCR1	4.17364	4.19451	0.00717214	0.682943	HL60
ENSG00000063176	SPHK2	11.3325	10.4754	-0.113316	0.466478	HL60
ENSG00000063177	RPL18	1711.29	1918.84	0.165148	0.208579	HL60
ENSG00000063180	CA11	0.771692	0.901929	0.22125	0.391411	HL60
ENSG00000063241	ISOC2	93.3223	90.6683	-0.0416179	0.840242	HL60
ENSG00000063244	U2AF2	220.908	227.33	0.0413349	0.119514	HL60
ENSG00000063245	EPN1	51.063	50.0013	-0.0303041	0.745215	HL60
ENSG00000063322	MED29	20.7422	18.6037	-0.156874	0.0718543	HL60
ENSG00000063438	AHRR	28.6736	24.5151	-0.225933	0.0944017	HL60
ENSG00000063515	GSC2	0	0	0	NA	HL60
ENSG00000063587	ZNF275	7.26347	6.57374	-0.143651	0.934795	HL60
ENSG00000063601	MTMR1	12.1311	9.93581	-0.287636	0.00525567	HL60
ENSG00000063660	GPC1	0.573822	0.515588	-0.150485	0.282296	HL60
ENSG00000063761	ADCK1	2.46308	3.01512	0.290247	0.597694	HL60
ENSG00000063854	HAGH	16.5815	20.9074	0.334186	0.54497	HL60
ENSG00000063978	RNF4	58.9634	59.7115	0.0181846	0.755549	HL60
ENSG00000064012	CASP8	20.8017	18.4215	-0.175181	0.162956	HL60
ENSG00000064042	LIMCH1	0	0	0	0.42265	HL60
ENSG00000064102	ASUN	55.9915	52.0511	-0.105251	0.224982	HL60
ENSG00000064115	TM7SF3	59.781	62.5048	0.064264	0.372536	HL60
ENSG00000064195	DLX3	0	0.107414	3.10832	0.190825	HL60
ENSG00000064199	SPA17	5.76134	5.57938	-0.046186	0.322095	HL60
ENSG00000064201	TSPAN32	41.4834	46.5743	0.166948	0.810113	HL60
ENSG00000064205	WISP2	0	0	0	NA	HL60
ENSG00000064218	DMRT3	0	0	0	NA	HL60
ENSG00000064225	ST3GAL6	43.7139	56.5607	0.371603	0.599401	HL60
ENSG00000064270	ATP2C2	0	0	0	0.42265	HL60
ENSG00000064300	NGFR	0.116366	0.141266	0.252016	0.267746	HL60
ENSG00000064309	CDON	0.756379	0.977996	0.364727	0.122064	HL60
ENSG00000064313	TAF2	17.1834	21.1284	0.297946	0.0984957	HL60
ENSG00000064393	HIPK2	4.17948	4.17841	-0.000368534	0.926376	HL60
ENSG00000064419	TNPO3	50.0859	45.8789	-0.126537	0.0538452	HL60
ENSG00000064489	MEF2BNB-MEF2B	13.0723	17.2997	0.403846	0.192604	HL60
ENSG00000064490	RFXANK	77.8122	76.338	-0.0275908	0.57476	HL60
ENSG00000064545	TMEM161A	25.0769	28.5507	0.187068	0.112179	HL60
ENSG00000064547	LPAR2	8.61109	9.14094	0.0860108	0.408307	HL60
ENSG00000064601	CTSA	150.974	153.591	0.0247981	0.43246	HL60
ENSG00000064607	SUGP2	50.9489	55.5653	0.1251	0.112352	HL60
ENSG00000064651	SLC12A2	1.68731	1.81473	0.104189	0.408079	HL60
ENSG00000064652	SNX24	0.855645	0.929896	0.11819	0.173449	HL60
ENSG00000064655	EYA2	0	0	0	NA	HL60
ENSG00000064666	CNN2	174.799	154.186	-0.181003	0.191634	HL60
ENSG00000064687	ABCA7	3.12634	3.66282	0.227532	0.34143	HL60
ENSG00000064692	SNCAIP	0	0	0	0.42265	HL60
ENSG00000064703	DDX20	20.0316	17.0105	-0.23567	0.0261842	HL60
ENSG00000064726	BTBD1	30.1187	33.148	0.138201	0.279762	HL60
ENSG00000064763	FAR2	23.8249	23.1242	-0.043046	0.43917	HL60
ENSG00000064787	BCAS1	0.320007	0.311501	-0.0372049	0.892105	HL60
ENSG00000064835	POU1F1	0	0	0	NA	HL60
ENSG00000064886	CHI3L2	0.979455	0.934503	-0.066796	0.683738	HL60
ENSG00000064932	SBNO2	18.0256	20.8491	0.209786	0.140992	HL60
ENSG00000064933	PMS1	9.73596	11.0514	0.18258	0.025654	HL60
ENSG00000064961	HMG20B	77.008	76.8333	-0.00327584	0.584273	HL60
ENSG00000064989	CALCRL	0	0	0	0.42265	HL60
ENSG00000064995	TAF11	45.5282	43.3687	-0.0700854	0.188209	HL60
ENSG00000064999	ANKS1A	6.01524	5.74844	-0.0652944	0.805668	HL60
ENSG00000065000	AP3D1	53.3732	51.6056	-0.0485759	0.747973	HL60
ENSG00000065029	ZNF76	12.7871	13.8006	0.109922	0.3356	HL60
ENSG00000065054	SLC9A3R2	0.675008	0.569295	-0.240263	0.440892	HL60
ENSG00000065057	NTHL1	23.089	20.1477	-0.196457	0.10539	HL60
ENSG00000065060	UHRF1BP1	11.2185	10.5858	-0.0836371	0.113075	HL60
ENSG00000065135	GNAI3	90.204	82.9884	-0.120262	0.136219	HL60
ENSG00000065150	IPO5	132.016	122.13	-0.112289	0.118944	HL60
ENSG00000065154	OAT	29.1109	30.1331	0.0497673	0.445158	HL60
ENSG00000065183	WDR3	50.9877	41.58	-0.29417	0.0139053	HL60
ENSG00000065243	PKN2	12.199	14.4257	0.241618	0.281758	HL60
ENSG00000065268	WDR18	69.1076	65.1037	-0.0860859	0.718014	HL60
ENSG00000065308	TRAM2	4.86798	4.14619	-0.230814	0.00824442	HL60
ENSG00000065320	NTN1	0.104579	0.22557	1.01405	0.387791	HL60
ENSG00000065325	GLP2R	0	0	0	NA	HL60
ENSG00000065328	MCM10	12.3736	10.9427	-0.177083	0.522721	HL60
ENSG00000065357	DGKA	9.21231	11.2469	0.2875	0.322248	HL60
ENSG00000065361	ERBB3	0.775774	0	-5.80893	0.424656	HL60
ENSG00000065371	ROPN1	0	0	0	0.42265	HL60
ENSG00000065413	ANKRD44	9.2885	8.48572	-0.130202	0.379822	HL60
ENSG00000065427	KARS	209.452	213.872	0.0301257	0.573237	HL60
ENSG00000065457	ADAT1	16.7179	13.5986	-0.297656	0.0268494	HL60
ENSG00000065485	PDIA5	35.0165	35.2318	0.00884179	0.480167	HL60
ENSG00000065491	TBC1D22B	9.64615	9.68216	0.00536811	0.895023	HL60
ENSG00000065518	NDUFB4	196.183	211.573	0.108945	0.221169	HL60
ENSG00000065526	SPEN	29.0077	27.7773	-0.0624984	0.54248	HL60
ENSG00000065534	MYLK	0.405633	0	-4.89676	0.672387	HL60
ENSG00000065548	ZC3H15	101.617	116.425	0.196238	0.183177	HL60
ENSG00000065559	MAP2K4	7.62198	7.49797	-0.0236216	0.899707	HL60
ENSG00000065600	TMEM206	27.5237	30.7091	0.157915	0.74913	HL60
ENSG00000065609	SNAP91	0	0	0	NA	HL60
ENSG00000065613	SLK	22.608	21.6137	-0.0648477	0.328733	HL60
ENSG00000065615	CYB5R4	24.9088	25.9727	0.0603111	0.90229	HL60
ENSG00000065618	COL17A1	1.7208	2.2557	0.387716	0.766244	HL60
ENSG00000065621	GSTO2	0.504253	0.547812	0.116412	0.423346	HL60
ENSG00000065665	SEC61A2	1.81337	2.31459	0.349672	0.0839939	HL60
ENSG00000065675	PRKCQ	0.42542	0.510731	0.255931	0.419842	HL60
ENSG00000065717	TLE2	0	0	0	0.42265	HL60
ENSG00000065802	ASB1	15.2495	11.5255	-0.403497	0.0807598	HL60
ENSG00000065809	FAM107B	150.061	128.498	-0.223784	0.166516	HL60
ENSG00000065833	ME1	1.66375	1.85819	0.15819	0.422863	HL60
ENSG00000065882	TBC1D1	95.1192	95.5556	0.00660358	0.500187	HL60
ENSG00000065883	CDK13	13.6051	13.459	-0.0155645	0.766544	HL60
ENSG00000065911	MTHFD2	250.371	302.483	0.272773	0.400077	HL60
ENSG00000065923	SLC9A7	1.09332	0.825863	-0.398814	0.4802	HL60
ENSG00000065970	FOXJ2	10.9869	17.7017	0.687405	0.278131	HL60
ENSG00000065978	YBX1	2228.99	2309.18	0.0509879	0.632238	HL60
ENSG00000065989	PDE4A	1.48402	1.39093	-0.0925581	0.474646	HL60
ENSG00000066027	PPP2R5A	20.5483	18.4841	-0.152623	0.203313	HL60
ENSG00000066032	CTNNA2	0	0	0	0.42265	HL60
ENSG00000066044	ELAVL1	89.7476	86.4983	-0.0531935	0.533351	HL60
ENSG00000066056	TIE1	0	0	0	0.542096	HL60
ENSG00000066084	DIP2B	12.8813	11.7404	-0.13365	0.628706	HL60
ENSG00000066117	SMARCD1	30.6334	28.8835	-0.0848194	0.621387	HL60
ENSG00000066135	KDM4A	20.2283	17.7985	-0.184481	0.0171317	HL60
ENSG00000066136	NFYC	50.483	53.1921	0.0753929	0.721495	HL60
ENSG00000066185	ZMYND12	1.66375	1.67566	0.010202	0.977326	HL60
ENSG00000066230	SLC9A3	0	0	0	NA	HL60
ENSG00000066248	NGEF	0	0	0	0.539396	HL60
ENSG00000066279	ASPM	15.2149	11.5403	-0.398369	0.00383929	HL60
ENSG00000066294	CD84	18.7196	16.0906	-0.218151	0.269252	HL60
ENSG00000066322	ELOVL1	80.2975	84.5994	0.075279	0.709956	HL60
ENSG00000066336	SPI1	336.477	301.799	-0.156917	0.330242	HL60
ENSG00000066379	ZNRD1	62.1104	63.0826	0.0224037	0.98128	HL60
ENSG00000066382	MPPED2	0	0	0	NA	HL60
ENSG00000066405	CLDN18	0	0	0	NA	HL60
ENSG00000066422	ZBTB11	17.3136	30.144	0.799466	0.0698573	HL60
ENSG00000066427	ATXN3	23.3981	21.1391	-0.146384	0.122561	HL60
ENSG00000066455	GOLGA5	18.5216	12.0411	-0.620648	0.00148318	HL60
ENSG00000066468	FGFR2	0	0.479037	5.12928	0.49363	HL60
ENSG00000066557	LRRC40	20.8017	20.4184	-0.026813	0.446872	HL60
ENSG00000066583	ISOC1	6.24498	6.94377	0.152696	0.400356	HL60
ENSG00000066629	EML1	0.781585	0	-5.8195	0.461322	HL60
ENSG00000066651	TRMT11	22.1677	27.1774	0.293778	0.155749	HL60
ENSG00000066654	THUMPD1	28.4042	25.9386	-0.130934	0.223147	HL60
ENSG00000066697	MSANTD3	8.55645	8.24776	-0.05292	0.600035	HL60
ENSG00000066735	KIF26A	0.0193943	0	-1.24885	0.267665	HL60
ENSG00000066739	ATG2B	3.91766	3.53392	-0.148159	0.199522	HL60
ENSG00000066777	ARFGEF1	22.2087	23.4592	0.0789809	0.987294	HL60
ENSG00000066813	ACSM2B	0	0	0	0.42265	HL60
ENSG00000066827	ZFAT	4.05342	3.94458	-0.0391282	0.844083	HL60
ENSG00000066855	MTFR1	13.4526	11.7296	-0.19751	0.932751	HL60
ENSG00000066923	STAG3	9.10564	10.6819	0.230005	0.955544	HL60
ENSG00000066926	FECH	23.3508	22.3852	-0.0608862	0.903589	HL60
ENSG00000066933	MYO9A	3.45219	4.23798	0.294776	0.158614	HL60
ENSG00000067048	DDX3Y	0	0	0	NA	HL60
ENSG00000067057	PFKP	43.9896	40.5488	-0.117464	0.538026	HL60
ENSG00000067064	IDI1	79.4323	100.185	0.334809	0.00984755	HL60
ENSG00000067066	SP100	26.6866	22.1244	-0.270318	0.124739	HL60
ENSG00000067082	KLF6	8.83215	39.4132	2.15606	0.0488531	HL60
ENSG00000067113	PPAP2A	10.0015	14.1157	0.496491	0.712921	HL60
ENSG00000067141	NEO1	0.237444	0.260799	0.128098	0.424375	HL60
ENSG00000067167	TRAM1	118.117	108.579	-0.121453	0.159746	HL60
ENSG00000067177	PHKA1	0.0855645	0.0869329	0.0196769	0.423266	HL60
ENSG00000067182	TNFRSF1A	87.2648	62.1897	-0.488632	0.233075	HL60
ENSG00000067191	CACNB1	1.43455	1.13013	-0.340342	0.515923	HL60
ENSG00000067208	EVI5	3.37368	3.41577	0.0178144	0.975017	HL60
ENSG00000067221	STOML1	2.94826	2.82532	-0.0611495	0.637981	HL60
ENSG00000067225	PKM	807.813	852.428	0.0775547	0.960451	HL60
ENSG00000067248	DHX29	7.44743	7.23717	-0.0412377	0.576719	HL60
ENSG00000067334	DNTTIP2	62.7407	61.3312	-0.032773	0.433929	HL60
ENSG00000067365	METTL22	14.5651	15.3602	0.0766061	0.816559	HL60
ENSG00000067369	TP53BP1	9.21244	8.14996	-0.176503	0.467962	HL60
ENSG00000067445	TRO	0	0	0	0.42265	HL60
ENSG00000067533	RRP15	39.9111	41.9989	0.0735382	0.767266	HL60
ENSG00000067560	RHOA	748.059	783.36	0.0665228	0.951886	HL60
ENSG00000067596	DHX8	35.2621	28.5614	-0.303914	0.00112681	HL60
ENSG00000067606	PRKCZ	2.20566	2.09458	-0.0740681	0.435162	HL60
ENSG00000067646	ZFY	0.209158	0.22557	0.102343	0.793301	HL60
ENSG00000067704	IARS2	60.0435	57.3214	-0.0669189	0.961734	HL60
ENSG00000067715	SYT1	0	0	0	0.92633	HL60
ENSG00000067798	NAV3	3.87824	4.28582	0.143672	0.760669	HL60
ENSG00000067829	IDH3G	63.9334	64.1674	0.00526812	0.901573	HL60
ENSG00000067836	ROGDI	38.4755	37.1204	-0.0517092	0.528832	HL60
ENSG00000067840	PDZD4	0	0.263001	4.29768	0.613682	HL60
ENSG00000067842	ATP2B3	0.145458	0.193345	0.378677	0.20049	HL60
ENSG00000067900	ROCK1	49.7129	50.7688	0.0303131	0.451682	HL60
ENSG00000067955	CBFB	61.4025	66.0582	0.105417	0.129962	HL60
ENSG00000067992	PDK3	6.99469	6.40044	-0.127821	0.319046	HL60
ENSG00000068001	HYAL2	9.19104	6.71338	-0.452374	0.673165	HL60
ENSG00000068024	HDAC4	16.1458	16.7781	0.0553728	0.886008	HL60
ENSG00000068028	RASSF1	56.2919	81.88	0.54047	0.105778	HL60
ENSG00000068078	FGFR3	0.361272	0.423798	0.222279	0.393923	HL60
ENSG00000068079	IFI35	10.6058	11.4396	0.109042	0.993131	HL60
ENSG00000068097	HEATR6	11.2375	8.67156	-0.373419	0.664102	HL60
ENSG00000068120	COASY	83.4926	77.6134	-0.105324	0.104561	HL60
ENSG00000068137	PLEKHH3	0.998809	1.66259	0.72712	0.073758	HL60
ENSG00000068305	MEF2A	10.8317	11.4826	0.0840744	0.375332	HL60
ENSG00000068308	OTUD5	28.0678	27.7128	-0.0183525	0.910904	HL60
ENSG00000068323	TFE3	11.7336	12.8038	0.12578	0.426691	HL60
ENSG00000068354	TBC1D25	8.54694	7.69085	-0.152	0.478389	HL60
ENSG00000068366	ACSL4	41.1375	42.7601	0.0557942	0.575313	HL60
ENSG00000068383	INPP5A	20.9049	19.6251	-0.0910788	0.327898	HL60
ENSG00000068394	GPKOW	18.0358	14.2027	-0.344399	0.0700625	HL60
ENSG00000068400	GRIPAP1	29.7994	31.9127	0.0988036	0.156595	HL60
ENSG00000068438	FTSJ1	45.9849	42.3749	-0.117914	0.0630659	HL60
ENSG00000068489	PRR11	42.1738	39.598	-0.0908887	0.557457	HL60
ENSG00000068615	REEP1	0.746682	0.558553	-0.409828	0.374198	HL60
ENSG00000068650	ATP11A	27.1525	26.4819	-0.0360544	0.367696	HL60
ENSG00000068654	POLR1A	21.1028	19.0492	-0.147601	0.297329	HL60
ENSG00000068697	LAPTM4A	47.5549	50.6887	0.0920437	0.379589	HL60
ENSG00000068724	TTC7A	61.4122	63.9066	0.0574268	0.560852	HL60
ENSG00000068745	IP6K2	40.6721	64.5368	0.665899	0.0163418	HL60
ENSG00000068781	STON1-GTF2A1L	0.057043	0.0537071	-0.0692964	0.377217	HL60
ENSG00000068784	SRBD1	11.5417	13.3333	0.207947	0.033458	HL60
ENSG00000068793	CYFIP1	13.099	11.8337	-0.146381	0.540412	HL60
ENSG00000068796	KIF2A	16.571	13.0723	-0.341818	0.832996	HL60
ENSG00000068831	RASGRP2	105.254	101.864	-0.047226	0.39707	HL60
ENSG00000068878	PSME4	27.1133	29.12	0.102957	0.334353	HL60
ENSG00000068885	IFT80	7.8838	8.94323	0.181599	0.0767273	HL60
ENSG00000068903	SIRT2	25.9593	26.3407	0.0210285	0.826473	HL60
ENSG00000068912	ERLEC1	39.2969	42.2997	0.106194	0.0426005	HL60
ENSG00000068971	PPP2R5B	0.855645	1.39638	0.697533	0.203325	HL60
ENSG00000068976	PYGM	0.332751	0.22557	-0.533287	0.473947	HL60
ENSG00000068985	PAGE1	0	0	0	NA	HL60
ENSG00000069011	PITX1	11.8693	7.86743	-0.592405	0.121601	HL60
ENSG00000069018	TRPC7	0	0	0	NA	HL60
ENSG00000069020	MAST4	0	1.74011	6.96006	0.360713	HL60
ENSG00000069122	GPR116	0	0	0	0.42265	HL60
ENSG00000069188	SDK2	2.53273	2.57794	0.025384	0.41381	HL60
ENSG00000069206	ADAM7	0	0	0	NA	HL60
ENSG00000069248	NUP133	32.214	28.3573	-0.18388	0.00696935	HL60
ENSG00000069275	NUCKS1	165.111	146.319	-0.174302	0.0501584	HL60
ENSG00000069329	VPS35	74.7738	65.5119	-0.190739	0.0140097	HL60
ENSG00000069345	DNAJA2	57.3006	65.0476	0.182903	0.315042	HL60
ENSG00000069399	BCL3	9.01279	5.99837	-0.586271	0.0073805	HL60
ENSG00000069424	KCNAB2	309.389	305.352	-0.0189478	0.373511	HL60
ENSG00000069431	ABCC9	1.28347	1.71693	0.415821	0.171841	HL60
ENSG00000069482	GAL	78.3919	80.413	0.0367167	0.54132	HL60
ENSG00000069493	CLEC2D	4.34433	4.88998	0.170173	0.961186	HL60
ENSG00000069509	FUNDC1	15.3636	15.1454	-0.020616	0.776255	HL60
ENSG00000069535	MAOB	0	0	0	0.42265	HL60
ENSG00000069667	RORA	0	0.441466	5.01495	0.525389	HL60
ENSG00000069696	DRD4	0.257231	0.279277	0.112707	0.431343	HL60
ENSG00000069702	TGFBR3	0.464994	0.64113	0.451703	0.0829107	HL60
ENSG00000069712	KIAA1107	0.22755	0.537071	1.18962	5.26347e-05	HL60
ENSG00000069764	PLA2G10	0	0	0	0.42265	HL60
ENSG00000069812	HES2	0.207763	0.236311	0.174636	0.832823	HL60
ENSG00000069849	ATP1B3	138.845	157.834	0.184917	0.035893	HL60
ENSG00000069869	NEDD4	18.8319	28.2392	0.58416	0.110602	HL60
ENSG00000069943	PIGB	15.5349	16.4195	0.0798264	0.395499	HL60
ENSG00000069956	MAPK6	35.7754	45.4659	0.345695	0.107913	HL60
ENSG00000069966	GNB5	9.5808	9.95382	0.0550245	0.569485	HL60
ENSG00000069974	RAB27A	100.709	94.7026	-0.0887095	0.344997	HL60
ENSG00000069998	CECR5	91.1832	78.0578	-0.224187	0.027193	HL60
ENSG00000070010	UFD1L	70.9348	74.6636	0.0738963	0.884214	HL60
ENSG00000070018	LRP6	2.37581	2.10812	-0.171378	0.463311	HL60
ENSG00000070019	GUCY2C	0	0.0322242	1.71683	0.405066	HL60
ENSG00000070031	SCT	0	0	0	NA	HL60
ENSG00000070047	PHRF1	24.272	22.7503	-0.0933518	0.558153	HL60
ENSG00000070061	IKBKAP	20.4879	17.9734	-0.188774	0.0197268	HL60
ENSG00000070081	NUCB2	499.928	520.174	0.0572736	0.532632	HL60
ENSG00000070087	PFN2	1.2169	1.23526	0.0213634	0.419021	HL60
ENSG00000070159	PTPN3	0.218665	0.206466	-0.0776673	0.442451	HL60
ENSG00000070182	SPTB	0.058183	0.0657502	0.14366	0.393037	HL60
ENSG00000070190	DAPP1	27.875	39.4241	0.499892	0.703672	HL60
ENSG00000070193	FGF10	0	0	0	NA	HL60
ENSG00000070214	SLC44A1	38.3038	38.0766	-0.00857942	0.458346	HL60
ENSG00000070269	C14orf101	6.68799	6.55226	-0.0295178	0.633425	HL60
ENSG00000070366	SMG6	4.36373	4.79218	0.134706	0.5097	HL60
ENSG00000070367	EXOC5	26.4204	23.5237	-0.167443	0.0724753	HL60
ENSG00000070371	CLTCL1	26.2308	28.7011	0.129773	0.670454	HL60
ENSG00000070388	FGF22	0.180636	0.182604	0.0145069	0.615278	HL60
ENSG00000070404	FSTL3	4.68703	4.56398	-0.0382654	0.351031	HL60
ENSG00000070413	DGCR2	20.4689	18.4101	-0.15283	0.025018	HL60
ENSG00000070423	RNF126	93.1801	79.4544	-0.229856	0.725541	HL60
ENSG00000070444	MNT	11.0839	11.2057	0.0157538	0.564573	HL60
ENSG00000070476	ZXDC	19.1855	23.7707	0.30897	0.509478	HL60
ENSG00000070495	JMJD6	16.3494	23.4936	0.522651	9.36897e-05	HL60
ENSG00000070501	POLB	18.2337	16.907	-0.1089	0.175499	HL60
ENSG00000070526	ST6GALNAC1	0	0	0	0.42265	HL60
ENSG00000070540	WIPI1	3.3341	3.45873	0.0527267	0.312018	HL60
ENSG00000070601	FRMPD1	0.237679	0.260799	0.126748	0.467135	HL60
ENSG00000070610	GBA2	19.9374	19.0709	-0.0640557	0.400491	HL60
ENSG00000070614	NDST1	25.1254	22.0199	-0.190223	0.0880972	HL60
ENSG00000070669	ASNS	45.7028	42.5645	-0.102596	0.274323	HL60
ENSG00000070718	AP3M2	10.9047	9.72562	-0.164864	0.491329	HL60
ENSG00000070729	CNGB1	0	0	0	0.42265	HL60
ENSG00000070731	ST6GALNAC2	0.436373	0.488998	0.159403	0.721048	HL60
ENSG00000070748	CHAT	0	0	0	0.85348	HL60
ENSG00000070756	PABPC1	1491.85	1582.43	0.0850366	0.839138	HL60
ENSG00000070759	TESK2	2.66672	3.15798	0.242752	0.0768121	HL60
ENSG00000070761	C16orf80	50.9489	55.1916	0.115365	0.00429042	HL60
ENSG00000070770	CSNK2A2	56.5636	56.6042	0.0010354	0.622902	HL60
ENSG00000070778	PTPN21	0.213338	0.249932	0.215252	0.377424	HL60
ENSG00000070785	EIF2B3	25.7929	28.8291	0.160469	0.718335	HL60
ENSG00000070808	CAMK2A	0.464994	0.385108	-0.263172	0.515064	HL60
ENSG00000070814	TCOF1	51.3482	52.877	0.0423147	0.207515	HL60
ENSG00000070831	CDC42	267.893	285.662	0.0926468	0.963822	HL60
ENSG00000070882	OSBPL3	3.13219	3.66205	0.224547	0.317277	HL60
ENSG00000070886	EPHA8	0.795168	0.698192	-0.184152	0.365594	HL60
ENSG00000070915	SLC12A3	0	0	0	NA	HL60
ENSG00000070950	RAD18	16.7136	15.994	-0.0634396	0.407301	HL60
ENSG00000070961	ATP2B1	53.4968	62.7113	0.229216	0.995744	HL60
ENSG00000070985	TRPM5	0	0	0	0.877755	HL60
ENSG00000071051	NCK2	35.8698	36.0052	0.00543266	0.766338	HL60
ENSG00000071054	MAP4K4	39.6259	39.6088	-0.000619855	0.526474	HL60
ENSG00000071073	MGAT4A	14.5632	16.7998	0.20593	0.755504	HL60
ENSG00000071082	RPL31	3082.93	3593.75	0.221187	0.693596	HL60
ENSG00000071127	WDR1	212.979	199.718	-0.0927465	0.262496	HL60
ENSG00000071189	SNX13	14.8597	15.1698	0.0297696	0.248709	HL60
ENSG00000071203	MS4A12	0	0	0	NA	HL60
ENSG00000071205	ARHGAP10	2.61447	3.02092	0.207429	0.221824	HL60
ENSG00000071242	RPS6KA2	1.01727	1.05406	0.0505741	0.883411	HL60
ENSG00000071243	ING3	29.1965	30.633	0.0692587	0.979725	HL60
ENSG00000071246	VASH1	1.05699	1.35833	0.357651	0.414026	HL60
ENSG00000071282	LMCD1	0	0.391198	4.84627	0.381768	HL60
ENSG00000071462	WBSCR22	68.8305	76.0062	0.143042	0.233936	HL60
ENSG00000071537	SEL1L	28.0733	23.4176	-0.261464	0.0260011	HL60
ENSG00000071539	TRIP13	35.9846	29.9685	-0.263818	0.843451	HL60
ENSG00000071553	ATP6AP1	85.1081	87.4781	0.0396181	0.302996	HL60
ENSG00000071564	TCF3	92.4667	101.678	0.136985	0.26647	HL60
ENSG00000071575	TRIB2	1.7067	2.27112	0.409256	0.233233	HL60
ENSG00000071626	DAZAP1	237.955	228.877	-0.0561145	0.841895	HL60
ENSG00000071655	MBD3	56.3775	54.5664	-0.0470946	0.491975	HL60
ENSG00000071677	PRLH	0	0	0	NA	HL60
ENSG00000071794	HLTF	15.877	13.2119	-0.264835	0.660476	HL60
ENSG00000071859	FAM50A	28.4438	29.4485	0.0500592	0.348038	HL60
ENSG00000071889	FAM3A	12.8347	14.6943	0.195006	0.252185	HL60
ENSG00000071894	CPSF1	74.4506	77.9397	0.0660627	0.357796	HL60
ENSG00000071909	MYO3B	0	0.152133	3.56044	0.184636	HL60
ENSG00000071967	CYBRD1	19.7276	20.527	0.0572699	0.27018	HL60
ENSG00000071991	CDH19	0	0	0	NA	HL60
ENSG00000071994	PDCD2	107.745	97.2957	-0.147156	0.133962	HL60
ENSG00000072041	SLC6A15	0	0	0	NA	HL60
ENSG00000072042	RDH11	14.1378	14.8983	0.0755219	0.440313	HL60
ENSG00000072062	PRKACA	38.6561	36.9827	-0.0638232	0.636788	HL60
ENSG00000072071	LPHN1	0.267124	0.423798	0.638895	0.413851	HL60
ENSG00000072080	SPP2	0	0	0	NA	HL60
ENSG00000072110	ACTN1	76.6087	70.7644	-0.114462	0.000548293	HL60
ENSG00000072121	ZFYVE26	3.27764	3.69141	0.170819	0.348033	HL60
ENSG00000072133	RPS6KA6	0	0	0	0.993587	HL60
ENSG00000072134	EPN2	2.54262	2.80351	0.140175	0.258906	HL60
ENSG00000072135	PTPN18	41.5233	33.0889	-0.327451	0.0232838	HL60
ENSG00000072163	LIMS2	0.630316	0	-5.51529	0.376133	HL60
ENSG00000072182	ASIC4	0	0.128897	3.3432	0.546515	HL60
ENSG00000072195	SPEG	0.989111	0.998951	0.0140818	0.600887	HL60
ENSG00000072201	LNX1	0.326485	0.478131	0.531335	0.30602	HL60
ENSG00000072210	ALDH3A2	14.2961	12.8307	-0.155859	0.0737227	HL60
ENSG00000072274	TFRC	262.778	255.539	-0.0402964	0.237071	HL60
ENSG00000072310	SREBF1	47.7925	54.8656	0.199062	0.275233	HL60
ENSG00000072315	TRPC5	0	0	0	NA	HL60
ENSG00000072364	AFF4	4.30674	4.57485	0.0868499	0.355768	HL60
ENSG00000072401	UBE2D1	14.4003	14.4091	0.000884275	0.417795	HL60
ENSG00000072415	MPP5	2.48326	2.99919	0.270933	0.328367	HL60
ENSG00000072422	RHOBTB1	2.49217	2.02119	-0.30031	0.135312	HL60
ENSG00000072444	ASAH2C	0.0380286	0.0322242	-0.170346	0.880833	HL60
ENSG00000072501	SMC1A	75.3664	72.6107	-0.0537284	0.545669	HL60
ENSG00000072506	HSD17B10	140.963	140.508	-0.00465639	0.83479	HL60
ENSG00000072518	MARK2	30.0141	27.6555	-0.118014	0.0926652	HL60
ENSG00000072571	HMMR	42.5221	34.295	-0.310098	0.0526267	HL60
ENSG00000072609	CHFR	26.2599	25.9278	-0.0183565	0.478356	HL60
ENSG00000072657	TRHDE	0.979414	0.870054	-0.168244	0.845886	HL60
ENSG00000072682	P4HA2	0.88052	1.17359	0.408822	0.296033	HL60
ENSG00000072694	FCGR2B	1.11796	1.30399	0.2195	0.377985	HL60
ENSG00000072736	NFATC3	34.1782	33.1323	-0.0448205	0.366076	HL60
ENSG00000072756	TRNT1	23.6158	16.6707	-0.502081	0.00817712	HL60
ENSG00000072778	ACADVL	125.132	132.85	0.0863324	0.410978	HL60
ENSG00000072786	STK10	56.7578	49.6361	-0.193377	0.150614	HL60
ENSG00000072803	FBXW11	22.5944	23.1024	0.0320592	0.39164	HL60
ENSG00000072818	ACAP1	24.2687	27.0253	0.155127	0.92303	HL60
ENSG00000072832	CRMP1	0	0	0	0.42265	HL60
ENSG00000072840	EVC	0	0	0	0.42265	HL60
ENSG00000072849	DERL2	16.2234	16.663	0.0385406	0.751799	HL60
ENSG00000072858	SIDT1	0.688499	0.590778	-0.216062	0.193886	HL60
ENSG00000072864	NDE1	51.4461	52.3445	0.0249692	0.581707	HL60
ENSG00000072952	MRVI1	0.998809	0.902279	-0.14449	0.882196	HL60
ENSG00000072954	TMEM38A	1.39639	1.5575	0.156041	0.296906	HL60
ENSG00000072958	AP1M1	72.1499	66.8949	-0.109078	0.0919519	HL60
ENSG00000073008	PVR	9.97263	13.0186	0.384051	0.190991	HL60
ENSG00000073009	IKBKG	29.2855	26.4879	-0.144775	0.316216	HL60
ENSG00000073050	XRCC1	28.4612	25.1027	-0.181059	0.126752	HL60
ENSG00000073060	SCARB1	65.8609	65.0822	-0.0171554	0.462369	HL60
ENSG00000073067	CYP2W1	0	0	0	0.932951	HL60
ENSG00000073111	MCM2	179.184	152.829	-0.229508	0.111194	HL60
ENSG00000073146	MOV10L1	0	0.263001	4.29768	0.40606	HL60
ENSG00000073150	PANX2	0.494372	0.601519	0.275874	0.864648	HL60
ENSG00000073169	RP3-402G11.5	21.895	23.2002	0.0834858	0.391839	HL60
ENSG00000073282	TP63	0.418315	0	-4.93971	0.16114	HL60
ENSG00000073331	ALPK1	3.84089	3.69141	-0.0570583	0.140103	HL60
ENSG00000073350	LLGL2	2.29823	2.14072	-0.101778	0.585006	HL60
ENSG00000073417	PDE8A	3.03521	3.02908	-0.00290605	0.509784	HL60
ENSG00000073464	CLCN4	3.74963	2.91225	-0.36306	0.140566	HL60
ENSG00000073536	NLE1	44.3984	55.2785	0.316119	0.198921	HL60
ENSG00000073578	SDHA	115.91	107.025	-0.115042	0.866239	HL60
ENSG00000073584	SMARCE1	108.822	97.199	-0.162929	0.485677	HL60
ENSG00000073598	FNDC8	0	0.0429656	2.01775	0.437777	HL60
ENSG00000073605	GSDMB	2.49088	3.78158	0.599565	0.0861008	HL60
ENSG00000073614	KDM5A	18.8432	23.385	0.311328	0.602628	HL60
ENSG00000073670	ADAM11	0.296804	0.456398	0.597734	0.384554	HL60
ENSG00000073711	PPP2R3A	0	0	0	0.988844	HL60
ENSG00000073712	FERMT2	0	0.394501	4.85798	0.452854	HL60
ENSG00000073734	ABCB11	0	0	0	NA	HL60
ENSG00000073737	DHRS9	3.77434	2.93241	-0.362601	0.0559311	HL60
ENSG00000073754	CD5L	0.057043	0.0537071	-0.0692964	0.878162	HL60
ENSG00000073756	PTGS2	1.11234	78.6743	6.12632	0.0656035	HL60
ENSG00000073792	IGF2BP2	0	0.515588	5.23244	0.41979	HL60
ENSG00000073803	MAP3K13	21.7334	21.0921	-0.0431805	0.459194	HL60
ENSG00000073849	ST6GAL1	13.0136	9.30206	-0.483775	0.948918	HL60
ENSG00000073861	TBX21	0.0791479	0.0760663	-0.0484875	0.471314	HL60
ENSG00000073910	FRY	24.2052	32.6324	0.43077	0.709702	HL60
ENSG00000073921	PICALM	58.2599	60.0272	0.0431031	0.860544	HL60
ENSG00000073969	NSF	33.688	28.5575	-0.238257	0.354402	HL60
ENSG00000074047	GLI2	0	0	0	0.42265	HL60
ENSG00000074054	CLASP1	12.2167	12.7248	0.0587227	0.149195	HL60
ENSG00000074071	MRPS34	218.864	174.67	-0.325382	0.226833	HL60
ENSG00000074181	NOTCH3	0.285215	0.290018	0.0229687	0.466428	HL60
ENSG00000074201	CLNS1A	341.935	350.847	0.0371191	0.818077	HL60
ENSG00000074211	PPP2R2C	0	0	0	NA	HL60
ENSG00000074219	TEAD2	0.513387	0.586797	0.187987	0.400653	HL60
ENSG00000074266	EED	24.3011	19.1035	-0.346957	0.100514	HL60
ENSG00000074276	CDHR2	0.1331	0.152133	0.175435	0.494186	HL60
ENSG00000074317	SNCB	0	0	0	NA	HL60
ENSG00000074319	TSG101	46.3189	44.6075	-0.0542987	0.238742	HL60
ENSG00000074356	C17orf85	16.8467	21.6463	0.361388	0.214686	HL60
ENSG00000074370	ATP2A3	62.1768	59.7545	-0.0573173	0.481157	HL60
ENSG00000074410	CA12	0.0890413	0	-2.8718	0.905944	HL60
ENSG00000074416	MGLL	5.65907	5.64998	-0.00231322	0.545304	HL60
ENSG00000074527	NTN4	0	0	0	NA	HL60
ENSG00000074582	BCS1L	37.991	35.2513	-0.107938	0.220148	HL60
ENSG00000074590	NUAK1	0	0	0	NA	HL60
ENSG00000074603	DPP8	19.1228	17.5622	-0.122727	0.212281	HL60
ENSG00000074621	SLC24A1	2.08489	1.58653	-0.391062	0.672365	HL60
ENSG00000074657	ZNF532	0.930928	0	-6.06767	0.195136	HL60
ENSG00000074660	SCARF1	0.180636	0.173866	-0.0510521	0.424704	HL60
ENSG00000074695	LMAN1	90.7529	94.4922	0.0582425	0.580272	HL60
ENSG00000074696	PTPLAD1	40.6796	40.7933	0.00402374	0.45464	HL60
ENSG00000074706	IPCEF1	15.7773	15.328	-0.0416432	0.384564	HL60
ENSG00000074755	ZZEF1	7.24203	7.98696	0.140992	0.185748	HL60
ENSG00000074771	NOX3	0	0	0	NA	HL60
ENSG00000074800	ENO1	2744.66	2962.79	0.110331	0.942789	HL60
ENSG00000074803	SLC12A1	0	0	0	NA	HL60
ENSG00000074842	C19orf10	182.224	202.078	0.149191	0.534409	HL60
ENSG00000074855	ANO8	0.688499	0.999729	0.529047	0.208336	HL60
ENSG00000074935	TUBE1	9.68747	10.997	0.18267	0.547623	HL60
ENSG00000074964	ARHGEF10L	0.865152	0.586797	-0.549166	0.10266	HL60
ENSG00000074966	TXK	0.426675	0.597664	0.472941	0.205297	HL60
ENSG00000075035	WSCD2	0	0	0	NA	HL60
ENSG00000075043	KCNQ2	0	0	0	0.42265	HL60
ENSG00000075073	TACR2	0.0855645	0.182604	0.980952	0.178149	HL60
ENSG00000075089	ACTR6	19.2198	18.9188	-0.0227566	0.471122	HL60
ENSG00000075131	TIPIN	18.7834	20.4401	0.121856	0.273046	HL60
ENSG00000075142	SRI	62.6825	68.5302	0.128649	0.307029	HL60
ENSG00000075151	EIF4G3	21.0203	25.962	0.304432	0.00396186	HL60
ENSG00000075188	NUP37	52.0802	47.9218	-0.12002	0.235834	HL60
ENSG00000075213	SEMA3A	0.732051	0.91302	0.313292	0.836018	HL60
ENSG00000075218	GTSE1	16.7892	14.1142	-0.250159	0.26658	HL60
ENSG00000075223	SEMA3C	0.223035	0.257794	0.197344	0.605037	HL60
ENSG00000075234	TTC38	9.32955	8.80196	-0.0838528	0.700193	HL60
ENSG00000075239	ACAT1	116.32	112.033	-0.0541712	0.672095	HL60
ENSG00000075240	GRAMD4	45.7199	39.0655	-0.226853	0.12617	HL60
ENSG00000075275	CELSR1	0.941209	1.02043	0.114943	0.982904	HL60
ENSG00000075290	WNT8B	0	0	0	0.42265	HL60
ENSG00000075292	ZNF638	23.4447	19.3534	-0.276486	0.573419	HL60
ENSG00000075303	SLC25A40	32.8758	32.8933	0.000766865	0.443998	HL60
ENSG00000075336	TIMM21	52.2871	42.0097	-0.31564	0.0205643	HL60
ENSG00000075340	ADD2	1.99848	2.03013	0.0225069	0.429908	HL60
ENSG00000075388	FGF4	0	0	0	NA	HL60
ENSG00000075391	RASAL2	5.0061	4.26434	-0.230661	0.359437	HL60
ENSG00000075399	VPS9D1	2.10429	1.98859	-0.081026	0.695797	HL60
ENSG00000075407	ZNF37A	11.0936	9.99729	-0.149913	0.986107	HL60
ENSG00000075413	MARK3	35.6565	36.6175	0.0383524	0.539948	HL60
ENSG00000075415	SLC25A3	520.14	585.031	0.169609	0.0361299	HL60
ENSG00000075420	FNDC3B	34.871	45.5543	0.385423	0.0108172	HL60
ENSG00000075426	FOSL2	45.247	55.5067	0.294757	0.714871	HL60
ENSG00000075429	CACNG5	0	0	0	NA	HL60
ENSG00000075461	CACNG4	0	0	0	NA	HL60
ENSG00000075539	FRYL	9.63075	11.6925	0.279489	0.0546048	HL60
ENSG00000075568	TMEM131	19.9848	16.9822	-0.234705	0.0910512	HL60
ENSG00000075618	FSCN1	11.5702	13.0938	0.178262	0.409689	HL60
ENSG00000075624	ACTB	4632.7	4137.42	-0.16312	0.0764485	HL60
ENSG00000075643	MOCOS	0.0387887	0.0434665	0.122293	0.786647	HL60
ENSG00000075651	PLD1	3.96449	4.80305	0.275923	0.259754	HL60
ENSG00000075673	ATP12A	0	0	0	0.42265	HL60
ENSG00000075702	WDR62	13.0495	14.5224	0.154126	0.30113	HL60
ENSG00000075711	DLG1	21.7508	23.6349	0.119779	0.373583	HL60
ENSG00000075785	RAB7A	224.285	235.763	0.0719998	0.034098	HL60
ENSG00000075790	BCAP29	26.609	28.6903	0.108592	0.309466	HL60
ENSG00000075826	SEC31B	8.10683	9.36651	0.208036	0.272519	HL60
ENSG00000075856	SART3	38.0667	34.5873	-0.138231	0.986542	HL60
ENSG00000075884	ARHGAP15	48.7908	45.3681	-0.104897	0.0254524	HL60
ENSG00000075886	TUBA3D	0	0	0	NA	HL60
ENSG00000075891	PAX2	0.368492	0.309965	-0.239531	0.996184	HL60
ENSG00000075914	EXOSC7	88.0025	76.6937	-0.198403	0.00995341	HL60
ENSG00000075945	KIFAP3	4.20857	4.68326	0.153693	0.324261	HL60
ENSG00000075975	MKRN2	33.4082	33.4293	0.000911487	0.613191	HL60
ENSG00000076003	MCM6	202.883	178.799	-0.182292	0.128011	HL60
ENSG00000076043	REXO2	48.9134	49.1097	0.00577836	0.893332	HL60
ENSG00000076053	RBM7	25.1545	26.441	0.0719222	0.117901	HL60
ENSG00000076067	RBMS2	1.21215	1.09562	-0.144049	0.486566	HL60
ENSG00000076108	BAZ2A	26.9202	26.3057	-0.0332932	0.583024	HL60
ENSG00000076201	PTPN23	14.4876	13.9209	-0.0575094	0.998565	HL60
ENSG00000076242	MLH1	50.0471	50.3665	0.00917501	0.448173	HL60
ENSG00000076248	UNG	90.7744	87.7697	-0.048555	0.619883	HL60
ENSG00000076258	FMO4	0.989348	0.859313	-0.200233	0.522943	HL60
ENSG00000076321	KLHL20	9.32653	8.95834	-0.0580193	0.57575	HL60
ENSG00000076344	RGS11	0	0	0	0.42265	HL60
ENSG00000076351	SLC46A1	0.407281	0.434665	0.0908357	0.39212	HL60
ENSG00000076356	PLXNA2	0	0	0	0.965129	HL60
ENSG00000076382	SPAG5	40.282	38.1418	-0.0787346	0.929964	HL60
ENSG00000076513	ANKRD13A	59.2011	53.1163	-0.15643	0.0486721	HL60
ENSG00000076554	TPD52	41.9931	41.5213	-0.0162947	0.52812	HL60
ENSG00000076555	ACACB	0.727288	0.751899	0.0471146	0.393134	HL60
ENSG00000076604	TRAF4	16.4755	31.7946	0.947865	0.0126174	HL60
ENSG00000076641	PAG1	5.73822	5.42244	-0.0814546	0.325294	HL60
ENSG00000076650	GPATCH1	8.5626	7.65863	-0.160684	0.0857941	HL60
ENSG00000076662	ICAM3	43.9041	45.2921	0.0448893	0.275179	HL60
ENSG00000076685	NT5C2	77.7781	70.4592	-0.14255	0.222088	HL60
ENSG00000076706	MCAM	0.554035	0.67373	0.275824	0.310743	HL60
ENSG00000076716	GPC4	0	0	0	0.42265	HL60
ENSG00000076770	MBNL3	6.76862	7.2589	0.100686	0.802508	HL60
ENSG00000076826	CAMSAP3	0.0760573	0.0651997	-0.185152	0.483369	HL60
ENSG00000076864	RAP1GAP	0.821159	0.91302	0.150534	0.775519	HL60
ENSG00000076924	XAB2	36.1938	35.35	-0.0340181	0.962751	HL60
ENSG00000076928	ARHGEF1	85.9828	89.5409	0.0584903	0.699036	HL60
ENSG00000076944	STXBP2	144.927	140.864	-0.0410214	0.383235	HL60
ENSG00000076984	MAP2K7	29.5578	28.8299	-0.0359516	0.753861	HL60
ENSG00000077009	NMRK2	0	0	0	NA	HL60
ENSG00000077044	DGKD	25.85	29.0018	0.165895	0.918384	HL60
ENSG00000077063	CTTNBP2	0.44607	0.440398	-0.0178932	0.543124	HL60
ENSG00000077080	ACTL6B	0	0	0	NA	HL60
ENSG00000077092	RARB	0	0	0	NA	HL60
ENSG00000077097	TOP2B	165.599	160.609	-0.0441372	0.212955	HL60
ENSG00000077147	TM9SF3	91.6871	89.7039	-0.0315421	0.397774	HL60
ENSG00000077150	NFKB2	5.51769	13.3551	1.27309	0.0358689	HL60
ENSG00000077152	UBE2T	46.5946	48.4216	0.055473	0.833032	HL60
ENSG00000077157	PPP1R12B	3.71995	4.03152	0.115618	0.877794	HL60
ENSG00000077232	DNAJC10	32.7279	30.9699	-0.079623	0.0616319	HL60
ENSG00000077235	GTF3C1	13.2375	12.5889	-0.0723932	0.0425905	HL60
ENSG00000077238	IL4R	9.45963	8.05606	-0.231335	0.0648907	HL60
ENSG00000077254	USP33	23.1859	22.5591	-0.039516	0.682979	HL60
ENSG00000077264	PAK3	0	0	0	NA	HL60
ENSG00000077274	CAPN6	0	0	0	NA	HL60
ENSG00000077279	DCX	0	0	0	NA	HL60
ENSG00000077312	SNRPA	145.82	138.832	-0.0708427	0.134383	HL60
ENSG00000077327	SPAG6	0	0	0	0.896027	HL60
ENSG00000077348	EXOSC5	79.9047	82.5907	0.0476913	0.67398	HL60
ENSG00000077380	DYNC1I2	49.152	45.2213	-0.120211	0.101551	HL60
ENSG00000077420	APBB1IP	34.835	34.4799	-0.0147726	0.428548	HL60
ENSG00000077454	LRCH4	59.1441	60.7438	0.0384952	0.89572	HL60
ENSG00000077458	FAM76B	20.015	22.157	0.146588	0.774343	HL60
ENSG00000077463	SIRT6	21.2485	19.4957	-0.124122	0.772125	HL60
ENSG00000077498	TYR	0	0	0	NA	HL60
ENSG00000077514	POLD3	27.4139	22.1244	-0.30909	0.039596	HL60
ENSG00000077522	ACTN2	0.860733	1.69519	0.966328	0.308083	HL60
ENSG00000077549	CAPZB	251.292	248.606	-0.0155026	0.366318	HL60
ENSG00000077585	GPR137B	3.11835	3.74875	0.264537	0.117888	HL60
ENSG00000077616	NAALAD2	0	0	0	NA	HL60
ENSG00000077684	PHF17	33.9216	29.0247	-0.224818	0.0587868	HL60
ENSG00000077713	SLC25A43	8.92722	10.8166	0.276567	0.144582	HL60
ENSG00000077721	UBE2A	75.2791	86.5328	0.200962	0.0372654	HL60
ENSG00000077782	FGFR1	3.20391	3.50992	0.131051	0.323956	HL60
ENSG00000077800	FKBP6	0	0	0	0.965634	HL60
ENSG00000077809	GTF2I	104.912	94.094	-0.156976	0.327818	HL60
ENSG00000077935	SMC1B	0.116366	0.112715	-0.0409562	0.814419	HL60
ENSG00000077942	FBLN1	0.603502	0.695074	0.199464	0.311946	HL60
ENSG00000077943	ITGA8	0	0	0	NA	HL60
ENSG00000077984	CST7	173.487	186.004	0.1005	0.571997	HL60
ENSG00000078018	MAP2	0.290915	0	-4.43616	0.103038	HL60
ENSG00000078043	PIAS2	19.2198	20.355	0.0827299	0.258216	HL60
ENSG00000078053	AMPH	0	0	0	NA	HL60
ENSG00000078061	ARAF	58.183	58.332	0.00368857	0.300515	HL60
ENSG00000078070	MCCC1	33.3416	36.9505	0.148209	0.0637824	HL60
ENSG00000078081	LAMP3	0.336378	0.467265	0.457816	0.383391	HL60
ENSG00000078098	FAP	0	0	0	0.943848	HL60
ENSG00000078114	NEBL	0	0	0	0.42265	HL60
ENSG00000078124	ACER3	9.20293	9.47393	0.0418056	0.97146	HL60
ENSG00000078140	UBE2K	76.7703	75.1535	-0.0307023	0.794395	HL60
ENSG00000078142	PIK3C3	30.1158	30.0008	-0.00551684	0.668766	HL60
ENSG00000078177	N4BP2	10.4178	7.88063	-0.402045	0.00504609	HL60
ENSG00000078237	C12orf5	6.75725	6.18705	-0.126907	0.309862	HL60
ENSG00000078246	TULP3	2.94794	3.20094	0.118246	0.317254	HL60
ENSG00000078269	SYNJ2	6.70778	5.25255	-0.35198	0.212229	HL60
ENSG00000078295	ADCY2	0	0.263001	4.29768	0.402455	HL60
ENSG00000078304	PPP2R5C	66.0082	60.4075	-0.127889	0.0592926	HL60
ENSG00000078328	RBFOX1	0	0	0	NA	HL60
ENSG00000078369	GNB1	260.553	257.311	-0.0180669	0.228366	HL60
ENSG00000078399	HOXA9	0.1331	0.130399	-0.0267186	0.492772	HL60
ENSG00000078401	EDN1	0.193943	0.684597	1.74783	0.0976736	HL60
ENSG00000078403	MLLT10	17.0273	19.6246	0.20465	0.21901	HL60
ENSG00000078487	ZCWPW1	3.48128	3.49905	0.00731461	0.915648	HL60
ENSG00000078549	ADCYAP1R1	0	0	0	NA	HL60
ENSG00000078579	FGF20	0	0	0	NA	HL60
ENSG00000078589	P2RY10	0.0950716	0	-2.95378	0.582231	HL60
ENSG00000078596	ITM2A	2.48326	2.18419	-0.184025	0.427814	HL60
ENSG00000078618	NRD1	71.4875	73.8713	0.0473124	0.895245	HL60
ENSG00000078668	VDAC3	220.494	210.886	-0.0642726	0.0460395	HL60
ENSG00000078674	PCM1	51.4337	52.6002	0.0323436	0.97453	HL60
ENSG00000078687	TNRC6C	3.04229	3.25999	0.0992628	0.355459	HL60
ENSG00000078699	CBFA2T2	3.70779	4.52213	0.285459	0.167886	HL60
ENSG00000078725	DBC1	0	0	0	NA	HL60
ENSG00000078747	ITCH	20.0221	19.1305	-0.0656736	0.763865	HL60
ENSG00000078795	PKD2L2	0.316591	0.319358	0.0120207	0.501506	HL60
ENSG00000078804	TP53INP2	2.70551	5.09644	0.910079	3.49309e-05	HL60
ENSG00000078808	SDF4	153.787	144.848	-0.0863923	0.756873	HL60
ENSG00000078814	MYH7B	0.416978	0.450859	0.109155	0.106675	HL60
ENSG00000078898	BPIFB2	0	0	0	NA	HL60
ENSG00000078900	TP73	0.722544	0.749797	0.05241	0.976259	HL60
ENSG00000078902	TOLLIP	39.3692	33.1099	-0.249704	0.324428	HL60
ENSG00000078967	UBE2D4	9.94295	8.17421	-0.282152	0.911276	HL60
ENSG00000079101	CLUL1	0	0	0	NA	HL60
ENSG00000079102	RUNX1T1	2.88976	3.47732	0.265844	0.411982	HL60
ENSG00000079112	CDH17	0	0	0	NA	HL60
ENSG00000079134	THOC1	43.7439	43.6316	-0.00370791	0.923484	HL60
ENSG00000079150	FKBP7	9.19343	8.55016	-0.104484	0.702404	HL60
ENSG00000079156	OSBPL6	0.0890413	0	-2.8718	0.465736	HL60
ENSG00000079215	SLC1A3	2.58914	3.11872	0.267152	0.982461	HL60
ENSG00000079246	XRCC5	246.559	223.287	-0.143022	0.104524	HL60
ENSG00000079257	LXN	7.93848	7.28063	-0.124568	0.451448	HL60
ENSG00000079263	SP140	1.27626	1.74953	0.450775	0.494609	HL60
ENSG00000079277	MKNK1	32.9803	32.4713	-0.0224322	0.355111	HL60
ENSG00000079308	TNS1	10.4051	8.91063	-0.22336	0.241998	HL60
ENSG00000079313	REXO1	28.7497	32.1988	0.163387	0.0798229	HL60
ENSG00000079332	SAR1A	58.7543	69.5898	0.244129	0.0123291	HL60
ENSG00000079335	CDC14A	4.02153	5.86797	0.543532	0.0088468	HL60
ENSG00000079337	RAPGEF3	1.29605	1.39093	0.100871	0.308928	HL60
ENSG00000079385	CEACAM1	0.969561	1.35833	0.480501	0.408842	HL60
ENSG00000079387	SENP1	16.0671	13.5664	-0.243839	0.211957	HL60
ENSG00000079393	DUSP13	0	0	0	NA	HL60
ENSG00000079432	CIC	26.8387	27.4708	0.0335663	0.367494	HL60
ENSG00000079435	LIPE	0.523647	0.461881	-0.176029	0.386936	HL60
ENSG00000079459	FDFT1	331.537	340.868	0.0400434	0.713452	HL60
ENSG00000079462	PAFAH1B3	40.6226	44.6727	0.137063	0.257517	HL60
ENSG00000079482	OPHN1	1.01903	1.13013	0.147356	0.407591	HL60
ENSG00000079557	AFM	0	0	0	NA	HL60
ENSG00000079616	KIF22	120.507	113.85	-0.0819752	0.279421	HL60
ENSG00000079689	SCGN	0	0	0	NA	HL60
ENSG00000079691	LRRC16A	0	0.173866	3.73771	0.398672	HL60
ENSG00000079739	PGM1	31.8075	30.47	-0.0619516	0.514223	HL60
ENSG00000079785	DDX1	100.123	89.3888	-0.163587	0.153097	HL60
ENSG00000079805	DNM2	104.122	108.853	0.0640979	0.216103	HL60
ENSG00000079819	EPB41L2	1.19275	1.41266	0.241496	0.417823	HL60
ENSG00000079841	RIMS1	0	0	0	0.42265	HL60
ENSG00000079931	MOXD1	0.0791479	0.107414	0.38202	0.188554	HL60
ENSG00000079950	STX7	29.4529	28.7548	-0.034592	0.358694	HL60
ENSG00000079974	RABL2B	15.3844	13.3768	-0.201533	0.0165047	HL60
ENSG00000079999	KEAP1	52.1902	40.0218	-0.382875	0.279325	HL60
ENSG00000080007	DDX43	2.53841	2.36311	-0.102649	0.525338	HL60
ENSG00000080031	PTPRH	0.237679	0.369465	0.607334	0.266205	HL60
ENSG00000080166	DCT	0	0	0	0.42265	HL60
ENSG00000080189	SLC35C2	48.1561	52.0272	0.111515	0.134033	HL60
ENSG00000080200	CRYBG3	3.17097	3.81418	0.265371	0.24619	HL60
ENSG00000080224	EPHA6	0	0	0	0.42265	HL60
ENSG00000080293	SCTR	0	0	0	NA	HL60
ENSG00000080298	RFX3	2.20625	2.48846	0.172618	0.271273	HL60
ENSG00000080345	RIF1	30.3278	30.5569	0.0108515	0.631281	HL60
ENSG00000080371	RAB21	45.6914	52.5075	0.200542	0.548272	HL60
ENSG00000080493	SLC4A4	0.0791479	0	-2.7263	0.690728	HL60
ENSG00000080503	SMARCA2	50.1883	46.6178	-0.10644	0.229632	HL60
ENSG00000080511	RDH8	0	0	0	NA	HL60
ENSG00000080546	SESN1	5.20738	3.97319	-0.389051	0.000905652	HL60
ENSG00000080561	MID2	0	0	0	0.99388	HL60
ENSG00000080572	PIH1D3	0	0	0	NA	HL60
ENSG00000080573	COL5A3	0	0	0	NA	HL60
ENSG00000080603	SRCAP	32.2033	28.9159	-0.155274	0.144554	HL60
ENSG00000080608	KIAA0020	76.4137	84.7283	0.148986	0.829524	HL60
ENSG00000080618	CPB2	0	0	0	0.42265	HL60
ENSG00000080644	CHRNA3	0	0	0	NA	HL60
ENSG00000080709	KCNN2	7.11772	12.8661	0.85281	0.431415	HL60
ENSG00000080802	CNOT4	11.1994	9.98951	-0.16472	0.961874	HL60
ENSG00000080815	PSEN1	21.239	24.2004	0.188198	0.0794313	HL60
ENSG00000080819	CPOX	13.8805	16.0584	0.210076	0.00801142	HL60
ENSG00000080822	CLDND1	36.6359	46.4439	0.342114	0.153878	HL60
ENSG00000080823	MOK	3.85991	3.86691	0.00260471	0.81611	HL60
ENSG00000080824	HSP90AA1	678.973	1018.76	0.585376	0.0220996	HL60
ENSG00000080839	RBL1	28.6736	27.0796	-0.0824743	0.232232	HL60
ENSG00000080845	DLGAP4	11.5358	11.4396	-0.0120662	0.487625	HL60
ENSG00000080854	IGSF9B	0	0.184733	3.8188	0.353869	HL60
ENSG00000080910	CFHR2	0.427822	0	-4.97108	0.250992	HL60
ENSG00000080986	NDC80	41.8125	32.9869	-0.341912	0.0102109	HL60
ENSG00000081014	AP4E1	5.79758	5.88629	0.0218559	0.855885	HL60
ENSG00000081019	RSBN1	10.2694	10.019	-0.0355657	0.401107	HL60
ENSG00000081026	MAGI3	0.19787	0.214828	0.111043	0.422084	HL60
ENSG00000081041	CXCL2	0.589444	34.1538	5.82306	0.0600622	HL60
ENSG00000081051	AFP	0	0	0	NA	HL60
ENSG00000081052	COL4A4	0	0	0	NA	HL60
ENSG00000081059	TCF7	1.25093	1.246	-0.00563473	0.45325	HL60
ENSG00000081087	OSTM1	11.2584	12.2575	0.122519	0.669269	HL60
ENSG00000081138	CDH7	0	0.0537071	2.26661	0.551751	HL60
ENSG00000081148	IMPG2	0.0296804	0.0543331	0.644534	0.289432	HL60
ENSG00000081154	PCNP	142.579	148.994	0.0634888	0.779043	HL60
ENSG00000081177	EXD2	3.19559	2.52423	-0.338557	0.0424648	HL60
ENSG00000081181	ARG2	0.228172	0.565064	1.25738	0.382736	HL60
ENSG00000081189	MEF2C	2.70551	2.66232	-0.0230948	0.426307	HL60
ENSG00000081237	PTPRC	46.6516	49.5501	0.0869356	0.306742	HL60
ENSG00000081248	CACNA1S	0	0	0	NA	HL60
ENSG00000081277	PKP1	0	0	0	NA	HL60
ENSG00000081307	UBA5	29.6636	28.2206	-0.0719118	0.856705	HL60
ENSG00000081320	STK17B	41.1272	75.8599	0.883017	0.175156	HL60
ENSG00000081377	CDC14B	0.366059	0.441466	0.261064	0.314126	HL60
ENSG00000081386	ZNF510	5.87543	2.95389	-0.988669	0.117387	HL60
ENSG00000081479	LRP2	0	0	0	0.441139	HL60
ENSG00000081665	ZNF506	13.329	14.3935	0.110731	0.25226	HL60
ENSG00000081692	JMJD4	19.5204	16.1336	-0.274696	0.0298856	HL60
ENSG00000081721	DUSP12	38.459	32.6542	-0.235958	0.0536299	HL60
ENSG00000081760	AACS	8.39482	7.97013	-0.0747684	0.201074	HL60
ENSG00000081791	KIAA0141	72.8257	74.4165	0.031168	0.584482	HL60
ENSG00000081800	SLC13A1	0	0.130399	3.35828	0.397537	HL60
ENSG00000081803	CADPS2	0	0	0	NA	HL60
ENSG00000081818	PCDHB4	0	0	0	0.42265	HL60
ENSG00000081842	PCDHA6	0	0	0	NA	HL60
ENSG00000081853	PCDHGA2	0.019787	0.0187858	-0.0432805	0.310784	HL60
ENSG00000081870	HSPB11	45.2664	43.6077	-0.053839	0.540334	HL60
ENSG00000081913	PHLPP1	19.5657	19.549	-0.00123052	0.472515	HL60
ENSG00000081923	ATP8B1	0.310309	0.30076	-0.0431089	0.607947	HL60
ENSG00000081985	IL12RB2	0	0.290018	4.43191	0.416181	HL60
ENSG00000082014	SMARCD3	1.58064	1.43439	-0.138768	0.448889	HL60
ENSG00000082068	WDR70	25.9546	21.9769	-0.239856	0.105867	HL60
ENSG00000082074	FYB	16.4094	15.0068	-0.128787	0.250862	HL60
ENSG00000082126	MPP4	0.543042	0.601519	0.143997	0.794679	HL60
ENSG00000082146	STRADB	13.2075	13.5127	0.0329184	0.296139	HL60
ENSG00000082153	BZW1	170.007	197.772	0.21823	0.526335	HL60
ENSG00000082175	PGR	0	0	0	NA	HL60
ENSG00000082196	C1QTNF3	1.43558	1.53602	0.0966465	0.17236	HL60
ENSG00000082212	ME2	129.418	132.442	0.0333177	0.448328	HL60
ENSG00000082213	C5orf22	15.3547	12.3634	-0.312287	0.762427	HL60
ENSG00000082258	CCNT2	15.1354	21.0209	0.473525	0.0547221	HL60
ENSG00000082269	FAM135A	7.68724	10.634	0.467416	0.331484	HL60
ENSG00000082293	COL19A1	0	0	0	0.983099	HL60
ENSG00000082397	EPB41L3	89.5437	87.9435	-0.0260097	0.364523	HL60
ENSG00000082438	COBLL1	0	0	0	0.42265	HL60
ENSG00000082458	DLG3	0	0.249932	4.22798	0.398595	HL60
ENSG00000082482	KCNK2	0.407281	0	-4.90241	0.394933	HL60
ENSG00000082497	SERTAD4	0	0	0	NA	HL60
ENSG00000082512	TRAF5	0.237444	0.304265	0.339888	0.406967	HL60
ENSG00000082515	MRPL22	55.4193	54.4482	-0.0254979	0.411326	HL60
ENSG00000082516	GEMIN5	21.2465	17.0144	-0.320231	0.0037767	HL60
ENSG00000082556	OPRK1	0	0	0	NA	HL60
ENSG00000082641	NFE2L1	70.0656	61.9723	-0.177045	0.751424	HL60
ENSG00000082684	SEMA5B	0	0	0	0.42265	HL60
ENSG00000082701	GSK3B	19.6368	19.6246	-0.000896693	0.789272	HL60
ENSG00000082781	ITGB5	0	0	0	0.853322	HL60
ENSG00000082805	ERC1	6.34128	6.40188	0.0136923	0.570895	HL60
ENSG00000082898	XPO1	117.033	106.602	-0.134672	0.617127	HL60
ENSG00000082929	C4orf6	0	0	0	NA	HL60
ENSG00000082996	RNF13	20.8967	23.8245	0.189046	0.225759	HL60
ENSG00000083067	TRPM3	0.290915	0.311501	0.0942274	0.675368	HL60
ENSG00000083093	PALB2	15.6868	8.75425	-0.840472	0.000602535	HL60
ENSG00000083097	DOPEY1	1.69227	2.04292	0.269626	0.0172305	HL60
ENSG00000083099	LYRM2	29.0254	26.7427	-0.118107	0.427086	HL60
ENSG00000083123	BCKDHB	19.1538	19.4849	0.0247108	0.324209	HL60
ENSG00000083168	KAT6A	16.0472	13.3301	-0.267379	0.876099	HL60
ENSG00000083223	ZCCHC6	9.21231	14.0498	0.608152	0.177716	HL60
ENSG00000083290	ULK2	1.22679	1.40712	0.195759	0.875922	HL60
ENSG00000083307	GRHL2	0	0	0	NA	HL60
ENSG00000083312	TNPO1	31.1941	27.8847	-0.161724	0.66918	HL60
ENSG00000083444	PLOD1	22.9047	24.2434	0.0818964	0.40652	HL60
ENSG00000083454	P2RX5	1.16743	1.14099	-0.0326463	0.428555	HL60
ENSG00000083457	ITGAE	1.207	1.26053	0.0618894	0.194412	HL60
ENSG00000083520	DIS3	41.0804	40.1739	-0.0321826	0.50314	HL60
ENSG00000083535	PIBF1	9.13473	10.6602	0.222475	0.0523028	HL60
ENSG00000083544	TDRD3	6.81711	7.56317	0.149536	0.0747938	HL60
ENSG00000083635	NUFIP1	19.7434	21.831	0.144909	0.995296	HL60
ENSG00000083642	PDS5B	25.5838	20.5705	-0.314458	0.0343211	HL60
ENSG00000083720	OXCT1	64.1638	62.0267	-0.0488611	0.515939	HL60
ENSG00000083750	RRAGB	6.76862	7.9435	0.230468	0.334922	HL60
ENSG00000083782	EPYC	0	0	0	NA	HL60
ENSG00000083799	CYLD	15.6013	17.9191	0.199664	0.984563	HL60
ENSG00000083807	SLC27A5	13.3671	15.8973	0.249856	0.428204	HL60
ENSG00000083812	ZNF324	7.92259	6.03097	-0.392778	0.0252981	HL60
ENSG00000083814	ZNF671	7.72864	5.17251	-0.578054	0.00946013	HL60
ENSG00000083817	ZNF416	5.17429	2.70579	-0.931743	0.0998405	HL60
ENSG00000083828	ZNF586	11.2885	15.3173	0.439835	0.0464896	HL60
ENSG00000083838	ZNF446	2.7346	2.27112	-0.266417	0.113121	HL60
ENSG00000083842	ZNF8	8.00986	5.13991	-0.638621	0.0124617	HL60
ENSG00000083844	ZNF264	7.71982	5.81364	-0.408263	0.0786878	HL60
ENSG00000083845	RPS5	2343.83	2691.93	0.199776	0.605686	HL60
ENSG00000083857	FAT1	10.5959	11.2892	0.0913199	0.575035	HL60
ENSG00000083896	YTHDC1	35.4819	40.8174	0.202023	0.00432357	HL60
ENSG00000083937	CHMP2B	18.318	20.125	0.135629	0.0578322	HL60
ENSG00000084070	SMAP2	60.7043	54.416	-0.157729	0.176988	HL60
ENSG00000084072	PPIE	61.9297	60.9468	-0.0230752	0.454767	HL60
ENSG00000084073	ZMPSTE24	36.8117	33.5562	-0.133534	0.00852064	HL60
ENSG00000084090	STARD7	131.104	114.074	-0.200719	0.0784326	HL60
ENSG00000084092	NOA1	21.7429	18.6041	-0.224763	0.445109	HL60
ENSG00000084093	REST	18.0161	9.82839	-0.873318	0.418732	HL60
ENSG00000084110	HAL	11.1804	11.1281	-0.00675849	0.534839	HL60
ENSG00000084112	SSH1	6.92544	7.0034	0.0161178	0.44935	HL60
ENSG00000084207	GSTP1	569.845	615.354	0.110845	0.0967904	HL60
ENSG00000084234	APLP2	297.296	297.8	0.00244273	0.362775	HL60
ENSG00000084444	KIAA1467	5.16239	4.70474	-0.133542	0.378059	HL60
ENSG00000084453	SLCO1A2	1.12185	1.10637	-0.0197951	0.956227	HL60
ENSG00000084463	WBP11	105.864	105.308	-0.0075907	0.429303	HL60
ENSG00000084623	EIF3I	308.365	336.067	0.124103	0.934378	HL60
ENSG00000084628	NKAIN1	0.306698	0	-4.50894	0.413689	HL60
ENSG00000084636	COL16A1	0	0	0	0.963868	HL60
ENSG00000084652	TXLNA	47.2315	43.5317	-0.117647	0.0312272	HL60
ENSG00000084674	APOB	0	0	0	NA	HL60
ENSG00000084676	NCOA1	4.74407	4.36101	-0.121088	0.868136	HL60
ENSG00000084693	AGBL5	14.73	13.9638	-0.0769867	0.654522	HL60
ENSG00000084710	EFR3B	0.0665501	0.084536	0.290472	0.75195	HL60
ENSG00000084731	KIF3C	1.26637	1.48231	0.224843	0.383326	HL60
ENSG00000084733	RAB10	64.0692	64.5912	0.0117035	0.611648	HL60
ENSG00000084734	GCKR	0	0	0	NA	HL60
ENSG00000084754	HADHA	282.673	292.618	0.0498822	0.456204	HL60
ENSG00000084764	MAPRE3	0.544142	0.494105	-0.135482	0.828825	HL60
ENSG00000084774	CAD	39.3266	37.9245	-0.052356	0.552314	HL60
ENSG00000085063	CD59	17.4818	16.1804	-0.111512	0.458653	HL60
ENSG00000085117	CD82	30.0903	32.7737	0.123185	0.660207	HL60
ENSG00000085185	BCORL1	3.41307	4.21063	0.301843	0.315403	HL60
ENSG00000085224	ATRX	9.84942	10.7254	0.122746	0.29739	HL60
ENSG00000085231	TAF9	139.964	146.738	0.0681797	0.327215	HL60
ENSG00000085265	FCN1	2.46348	2.50275	0.0226888	0.440549	HL60
ENSG00000085274	MYNN	14.7314	19.6468	0.415059	0.0979292	HL60
ENSG00000085276	MECOM	0	0.657502	5.57491	0.440158	HL60
ENSG00000085365	SCAMP1	17.8428	18.5182	0.0535604	0.671683	HL60
ENSG00000085377	PREP	45.758	44.6306	-0.0359797	0.212995	HL60
ENSG00000085382	HACE1	9.27899	11.3966	0.296162	0.0907751	HL60
ENSG00000085415	SEH1L	163.504	147.764	-0.146017	0.176467	HL60
ENSG00000085433	WDR47	4.62048	5.91852	0.356231	0.100033	HL60
ENSG00000085449	WDFY1	29.8673	26.6015	-0.166976	0.239705	HL60
ENSG00000085465	OVGP1	0.446837	0.543331	0.27423	0.306467	HL60
ENSG00000085491	SLC25A24	20.0731	21.7441	0.11528	0.784731	HL60
ENSG00000085511	MAP3K4	18.3955	17.9274	-0.037159	0.36828	HL60
ENSG00000085514	PILRA	7.84341	8.25863	0.0742916	0.516709	HL60
ENSG00000085552	IGSF9	0.0855645	0.0977996	0.16707	0.559337	HL60
ENSG00000085563	ABCB1	0	0	0	0.42265	HL60
ENSG00000085644	ZNF213	10.3566	5.61804	-0.880756	0.00642498	HL60
ENSG00000085662	AKR1B1	26.8806	27.9055	0.0539556	0.456984	HL60
ENSG00000085719	CPNE3	4.53121	4.62955	0.0308786	0.407683	HL60
ENSG00000085721	RRN3	30.5275	32.5781	0.0937522	0.954063	HL60
ENSG00000085733	CTTN	1.32573	1.14099	-0.214037	0.516652	HL60
ENSG00000085741	WNT11	0.209158	0.249932	0.242016	0.426375	HL60
ENSG00000085760	MTIF2	54.4475	50.968	-0.095249	0.172127	HL60
ENSG00000085788	DDHD2	14.0883	13.6485	-0.0457135	0.703427	HL60
ENSG00000085831	TTC39A	0.63698	0.582359	-0.126413	0.413399	HL60
ENSG00000085832	EPS15	20.5069	18.9586	-0.11318	0.671817	HL60
ENSG00000085840	ORC1	36.888	31.1329	-0.244613	0.0149765	HL60
ENSG00000085871	MGST2	83.2635	94.6917	0.185524	0.0669072	HL60
ENSG00000085872	CHERP	42.8033	40.5596	-0.0776537	0.830598	HL60
ENSG00000085978	ATG16L1	16.5337	17.3689	0.0710368	0.526053	HL60
ENSG00000085982	USP40	7.25348	7.32645	0.014413	0.854849	HL60
ENSG00000085998	POMGNT1	12.9963	14.1701	0.124618	0.308866	HL60
ENSG00000085999	RAD54L	18.6671	21.0378	0.172365	0.156182	HL60
ENSG00000086015	MAST2	6.5029	6.88525	0.0822518	0.345933	HL60
ENSG00000086061	DNAJA1	107.338	281.081	1.38871	0.0131525	HL60
ENSG00000086062	B4GALT1	15.3921	18.6637	0.277812	0.00143715	HL60
ENSG00000086065	CHMP5	41.7075	50.8907	0.287005	0.00970001	HL60
ENSG00000086102	NFX1	33.0577	34.0016	0.0406033	0.689835	HL60
ENSG00000086159	AQP6	0.126063	0.112715	-0.144398	0.938864	HL60
ENSG00000086189	DIMT1	21.2809	22.2132	0.061822	0.393653	HL60
ENSG00000086200	IPO11	12.713	11.3214	-0.167049	0.62624	HL60
ENSG00000086205	FOLH1	0	0	0	0.42265	HL60
ENSG00000086232	EIF2AK1	93.1607	81.6518	-0.190207	0.375689	HL60
ENSG00000086288	NME8	0.591527	0.751899	0.338917	0.29813	HL60
ENSG00000086289	EPDR1	1.66791	1.3749	-0.276144	0.431341	HL60
ENSG00000086300	SNX10	25.5054	23.2872	-0.131192	0.31677	HL60
ENSG00000086475	SEPHS1	32.3304	29.1092	-0.151344	0.582922	HL60
ENSG00000086504	MRPL28	96.4481	95.6588	-0.0118521	0.548596	HL60
ENSG00000086506	HBQ1	0.148402	0	-3.52769	0.463873	HL60
ENSG00000086544	ITPKC	4.31625	4.62918	0.10066	0.957315	HL60
ENSG00000086548	CEACAM6	5.99285	5.24181	-0.192693	0.277029	HL60
ENSG00000086570	FAT2	0	0	0	0.42265	HL60
ENSG00000086589	RBM22	49.5816	53.4815	0.109204	0.31511	HL60
ENSG00000086598	TMED2	227.669	199.522	-0.190378	0.376546	HL60
ENSG00000086619	ERO1LB	2.31762	3.52078	0.600268	0.113554	HL60
ENSG00000086666	ZFAND6	35.2395	37.479	0.0888526	0.323603	HL60
ENSG00000086696	HSD17B2	0	0	0	NA	HL60
ENSG00000086712	TXLNG	19.5848	19.875	0.021212	0.977814	HL60
ENSG00000086717	PPEF1	0	0	0	0.42265	HL60
ENSG00000086730	LAT2	281.507	278.235	-0.0168674	0.408364	HL60
ENSG00000086758	HUWE1	35.6363	38.9242	0.127272	0.258817	HL60
ENSG00000086827	ZW10	20.6259	16.7459	-0.300423	0.000541272	HL60
ENSG00000086848	ALG9	13.4791	15.0285	0.156828	0.602203	HL60
ENSG00000086967	MYBPC2	0	0	0	0.42265	HL60
ENSG00000086991	NOX4	0	0	0	NA	HL60
ENSG00000087008	ACOX3	13.89	12.8009	-0.117676	0.1351	HL60
ENSG00000087053	MTMR2	19.309	18.4108	-0.0686748	0.663207	HL60
ENSG00000087074	PPP1R15A	29.7004	386.352	3.70073	0.0699713	HL60
ENSG00000087076	HSD17B14	0	0	0	0.461094	HL60
ENSG00000087077	TRIP6	86.5627	79.8262	-0.116864	0.34534	HL60
ENSG00000087085	ACHE	0	0	0	0.42265	HL60
ENSG00000087086	FTL	4973.73	5538.6	0.155194	0.901506	HL60
ENSG00000087087	SRRT	134.18	136.365	0.0233061	0.537509	HL60
ENSG00000087088	BAX	90.6698	94.1914	0.0549655	0.740468	HL60
ENSG00000087095	NLK	5.09101	5.61776	0.141668	0.346674	HL60
ENSG00000087111	PIGS	59.4049	53.6702	-0.146423	0.171666	HL60
ENSG00000087116	ADAMTS2	0.0296804	0	-1.63533	0.60052	HL60
ENSG00000087128	TMPRSS11E	0	0	0	NA	HL60
ENSG00000087152	ATXN7L3	52.6432	51.8446	-0.0220471	0.78946	HL60
ENSG00000087157	PGS1	26.289	24.7804	-0.0852121	0.641832	HL60
ENSG00000087191	PSMC5	152.585	155.428	0.0266332	0.451018	HL60
ENSG00000087206	UIMC1	30.4039	34.9579	0.201275	0.296289	HL60
ENSG00000087237	CETP	0.228172	0.236311	0.0476734	0.902033	HL60
ENSG00000087245	MMP2	8.30926	7.52973	-0.141869	0.343335	HL60
ENSG00000087250	MT3	0	0	0	NA	HL60
ENSG00000087253	LPCAT2	60.0377	60.689	0.0155615	0.611262	HL60
ENSG00000087258	GNAO1	0	0	0	NA	HL60
ENSG00000087263	OGFOD1	42.2783	34.3276	-0.300437	0.0277251	HL60
ENSG00000087266	SH3BP2	33.9691	27.9598	-0.28074	0.0569337	HL60
ENSG00000087269	NOP14	74.6883	65.7756	-0.183291	0.00732914	HL60
ENSG00000087274	ADD1	63.2837	51.3122	-0.302459	0.043539	HL60
ENSG00000087299	L2HGDH	9.14589	8.4325	-0.116976	0.0734356	HL60
ENSG00000087301	TXNDC16	4.71555	5.6285	0.254626	0.087181	HL60
ENSG00000087302	C14orf166	163.637	159.632	-0.0357471	0.235325	HL60
ENSG00000087303	NID2	0.0989348	0.173866	0.733758	0.282549	HL60
ENSG00000087338	GMCL1	23.2299	22.2884	-0.0596508	0.089922	HL60
ENSG00000087365	SF3B2	160.357	150.219	-0.0942176	0.834629	HL60
ENSG00000087448	KLHL42	6.70778	5.92231	-0.179275	0.406464	HL60
ENSG00000087460	GNAS	662.079	769.493	0.216902	0.186687	HL60
ENSG00000087470	DNM1L	52.8028	50.3128	-0.06967	0.636985	HL60
ENSG00000087494	PTHLH	0	0	0	0.42265	HL60
ENSG00000087495	PHACTR3	10.7736	7.34713	-0.551364	0.0862558	HL60
ENSG00000087502	ERGIC2	65.6595	63.2454	-0.0540315	0.851582	HL60
ENSG00000087510	TFAP2C	0	0	0	0.42265	HL60
ENSG00000087586	AURKA	57.9309	40.2391	-0.525581	0.0345337	HL60
ENSG00000087589	CASS4	1.39498	1.1923	-0.224052	0.512177	HL60
ENSG00000087842	PIR	1.18305	1.20619	0.0276201	0.421912	HL60
ENSG00000087884	AAMDC	10.8729	13.3659	0.297471	0.255447	HL60
ENSG00000087903	RFX2	5.54678	6.06357	0.128206	0.269984	HL60
ENSG00000087916	SLC6A14	0	0	0	NA	HL60
ENSG00000087995	METTL2A	19.0452	17.191	-0.147663	0.788083	HL60
ENSG00000088002	SULT2B1	0.0678802	0.0429656	-0.522735	0.617196	HL60
ENSG00000088035	ALG6	10.2596	10.5624	0.0418992	0.224409	HL60
ENSG00000088038	CNOT3	39.9586	44.4847	0.154752	0.0403272	HL60
ENSG00000088053	GP6	0.123593	0	-3.28867	0.521502	HL60
ENSG00000088179	PTPN4	3.7722	4.60252	0.286048	0.0263613	HL60
ENSG00000088205	DDX18	126.364	130.036	0.0413179	0.453124	HL60
ENSG00000088247	KHSRP	316.011	308.88	-0.0329284	0.952523	HL60
ENSG00000088256	GNA11	1.50306	1.61121	0.0993426	0.647342	HL60
ENSG00000088280	ASAP3	0	0.369465	4.76676	0.375142	HL60
ENSG00000088298	EDEM2	21.924	21.5811	-0.0227248	0.512188	HL60
ENSG00000088305	DNMT3B	1.86186	2.17332	0.221607	0.356096	HL60
ENSG00000088320	REM1	0	0	0	NA	HL60
ENSG00000088325	TPX2	66.1444	55.0612	-0.264522	0.821854	HL60
ENSG00000088340	FER1L4	0.114086	0.107414	-0.0771207	0.95184	HL60
ENSG00000088356	PDRG1	27.7436	32.6969	0.236886	0.0247089	HL60
ENSG00000088367	EPB41L1	1.41579	1.3749	-0.0418539	0.728051	HL60
ENSG00000088386	SLC15A1	0.0395739	0.0375716	-0.0548624	0.945034	HL60
ENSG00000088387	DOCK9	0	0	0	0.42265	HL60
ENSG00000088448	ANKRD10	16.9277	34.4037	1.02256	0.0704331	HL60
ENSG00000088451	TGDS	23.169	21.1899	-0.128734	0.174928	HL60
ENSG00000088538	DOCK3	0.455767	0.391198	-0.213274	0.548172	HL60
ENSG00000088543	C3orf18	0.37819	0.504846	0.403676	0.291446	HL60
ENSG00000088682	COQ9	31.38	27.3239	-0.199587	0.0106525	HL60
ENSG00000088726	TMEM40	0	0	0	NA	HL60
ENSG00000088727	KIF9	13.0343	13.6811	0.0697925	0.14789	HL60
ENSG00000088756	ARHGAP28	0	0.698192	5.65977	0.508385	HL60
ENSG00000088766	CRLS1	52.8693	54.4526	0.0425594	0.673261	HL60
ENSG00000088782	DEFB127	0	0	0	NA	HL60
ENSG00000088808	PPP1R13B	0.665501	0.76264	0.192746	0.579468	HL60
ENSG00000088812	ATRN	27.1239	25.672	-0.0793297	0.2561	HL60
ENSG00000088826	SMOX	19.3566	31.7957	0.715598	0.495986	HL60
ENSG00000088827	SIGLEC1	0.0775774	0.0657502	-0.199294	0.25752	HL60
ENSG00000088832	FKBP1A	224.54	224.7	0.00102405	0.663305	HL60
ENSG00000088833	NSFL1C	81.5435	77.805	-0.0676954	0.0627431	HL60
ENSG00000088836	SLC4A11	0.603502	0.708933	0.227387	0.419509	HL60
ENSG00000088854	C20orf194	4.8098	6.09617	0.341039	0.271071	HL60
ENSG00000088876	ZNF343	6.38074	4.03152	-0.66055	0.216485	HL60
ENSG00000088881	EBF4	0	0	0	NA	HL60
ENSG00000088882	CPXM1	0.96002	1.32119	0.45499	0.240574	HL60
ENSG00000088888	MAVS	20.4998	21.7943	0.0882826	0.229603	HL60
ENSG00000088899	PROSAPIP1	0.290915	0.601519	1.01318	0.239148	HL60
ENSG00000088926	F11	0	0	0	NA	HL60
ENSG00000088930	XRN2	80.1264	78.4768	-0.0300062	0.725624	HL60
ENSG00000088970	PLK1S1	9.06685	8.13125	-0.156868	0.625366	HL60
ENSG00000088986	DYNLL1	248.752	301.994	0.279799	0.0344331	HL60
ENSG00000088992	TESC	182.475	193.292	0.0830717	0.653889	HL60
ENSG00000089006	SNX5	93.7121	139.252	0.571316	0.00155082	HL60
ENSG00000089009	RPL6	2547.32	2889.25	0.181713	0.053051	HL60
ENSG00000089012	SIRPG	0.51395	0.445531	-0.200202	0.707803	HL60
ENSG00000089022	MAPKAPK5	38.8469	45.2213	0.219132	0.0457199	HL60
ENSG00000089041	P2RX7	3.95645	3.97432	0.00648103	0.462068	HL60
ENSG00000089048	ESF1	29.7954	31.9587	0.101072	0.351189	HL60
ENSG00000089050	RBBP9	4.99126	4.15693	-0.263072	0.22261	HL60
ENSG00000089053	ANAPC5	164.677	156.838	-0.0703617	0.893838	HL60
ENSG00000089057	SLC23A2	22.769	23.0188	0.0157377	0.490194	HL60
ENSG00000089060	SLC24A6	33.8722	34.7514	0.0369554	0.537079	HL60
ENSG00000089063	TMEM230	105.321	103.059	-0.0313178	0.447408	HL60
ENSG00000089091	DZANK1	2.00731	1.82604	-0.13555	0.664539	HL60
ENSG00000089094	KDM2B	65.8244	50.1409	-0.392538	0.0655262	HL60
ENSG00000089101	C20orf26	0.65297	0	-5.56514	0.668574	HL60
ENSG00000089116	LHX5	0	0	0	NA	HL60
ENSG00000089123	TASP1	6.25268	7.49751	0.261397	0.0355027	HL60
ENSG00000089127	OAS1	1.00914	0.977468	-0.0453539	0.443812	HL60
ENSG00000089154	GCN1L1	32.8365	30.8286	-0.0909895	0.6588	HL60
ENSG00000089157	RPLP0	3696.72	4027.09	0.123494	0.111537	HL60
ENSG00000089159	PXN	1.80367	1.91252	0.0839035	0.425174	HL60
ENSG00000089163	SIRT4	0.296804	0.467265	0.630676	0.359434	HL60
ENSG00000089169	RPH3A	0	0	0	0.42265	HL60
ENSG00000089177	KIF16B	0.261824	0.30076	0.190446	0.410975	HL60
ENSG00000089195	TRMT6	35.3753	27.3799	-0.369459	0.0519913	HL60
ENSG00000089199	CHGB	0.285215	0.332984	0.213627	0.385552	HL60
ENSG00000089220	PEBP1	360.007	353.672	-0.0256148	0.549318	HL60
ENSG00000089225	TBX5	0	0	0	NA	HL60
ENSG00000089234	BRAP	17.3125	16.4521	-0.073488	0.347201	HL60
ENSG00000089248	ERP29	564.126	581.266	0.0431798	0.653043	HL60
ENSG00000089250	NOS1	0	0	0	NA	HL60
ENSG00000089280	FUS	596.023	589.102	-0.0168501	0.422671	HL60
ENSG00000089289	IGBP1	50.7647	52.1211	0.0380329	0.950494	HL60
ENSG00000089327	FXYD5	249.557	273.337	0.131305	0.113414	HL60
ENSG00000089335	ZNF302	8.34926	6.35697	-0.392548	0.126739	HL60
ENSG00000089351	GRAMD1A	16.0868	21.5159	0.419207	0.22585	HL60
ENSG00000089356	FXYD3	0	0	0	0.42265	HL60
ENSG00000089472	HEPH	0.217657	0.206644	-0.0702426	0.985286	HL60
ENSG00000089486	CDIP1	42.0026	40.4999	-0.0525443	0.29328	HL60
ENSG00000089505	CMTM1	2.76369	2.50275	-0.142321	0.739402	HL60
ENSG00000089558	KCNH4	0.692544	0.695464	0.00594893	0.919313	HL60
ENSG00000089597	GANAB	222.094	228.21	0.0391863	0.385676	HL60
ENSG00000089639	GMIP	41.0709	37.5412	-0.129595	0.0222842	HL60
ENSG00000089682	RBM41	5.53708	6.28091	0.181412	0.143807	HL60
ENSG00000089685	BIRC5	97.1252	88.1391	-0.140041	0.8264	HL60
ENSG00000089692	LAG3	0.0791479	0.0966727	0.248486	0.662877	HL60
ENSG00000089693	MLF2	107.91	114.965	0.0913573	0.230435	HL60
ENSG00000089723	OTUB2	0.465464	0.279277	-0.70899	0.817654	HL60
ENSG00000089737	DDX24	93.8686	97.908	0.0607746	0.67293	HL60
ENSG00000089775	ZBTB25	1.75519	2.17332	0.306066	0.242611	HL60
ENSG00000089818	NECAP1	26.2969	117.327	2.15697	0.0967634	HL60
ENSG00000089820	ARHGAP4	114.267	112.459	-0.0230062	0.800685	HL60
ENSG00000089847	ANKRD24	0.252126	0.311501	0.290462	0.451224	HL60
ENSG00000089876	DHX32	14.0611	10.2473	-0.455926	0.00712734	HL60
ENSG00000089902	RCOR1	42.7299	42.9231	0.00650591	0.574156	HL60
ENSG00000089916	GPATCH2L	13.0438	14.1142	0.113664	0.408766	HL60
ENSG00000090006	LTBP4	1.07639	1.29313	0.261542	0.415159	HL60
ENSG00000090013	BLVRB	26.5121	30.6004	0.206799	0.177861	HL60
ENSG00000090020	SLC9A1	6.29346	5.96577	-0.076968	0.678535	HL60
ENSG00000090054	SPTLC1	46.5464	47.1978	0.0200424	0.904811	HL60
ENSG00000090060	PAPOLA	121.92	110.85	-0.137303	0.117035	HL60
ENSG00000090061	CCNK	68.7626	70.9807	0.0457938	0.641287	HL60
ENSG00000090097	PCBP4	1.31199	1.48873	0.180503	0.39831	HL60
ENSG00000090104	RGS1	1.24124	13.7137	3.45096	0.0557201	HL60
ENSG00000090238	YPEL3	0.840946	0.91302	0.116756	0.714736	HL60
ENSG00000090263	MRPS33	95.3523	96.1893	0.0126079	0.8565	HL60
ENSG00000090266	NDUFB2	162.097	184.924	0.19006	0.0827437	HL60
ENSG00000090273	NUDC	173.878	188.927	0.119745	0.109784	HL60
ENSG00000090316	MAEA	57.4328	41.6015	-0.465104	0.0195897	HL60
ENSG00000090339	ICAM1	1.92995	2.63165	0.444608	0.375881	HL60
ENSG00000090372	STRN4	39.8635	46.2049	0.212905	0.121052	HL60
ENSG00000090376	IRAK3	26.1732	23.787	-0.137838	0.289202	HL60
ENSG00000090382	LYZ	8000.13	8279.08	0.0494463	0.493969	HL60
ENSG00000090402	SI	0	0	0	NA	HL60
ENSG00000090432	MUL1	16.7892	12.301	-0.448319	0.00601108	HL60
ENSG00000090447	TFAP4	37.6008	25.006	-0.588217	0.0185947	HL60
ENSG00000090470	PDCD7	12.9583	11.4969	-0.17243	0.684259	HL60
ENSG00000090487	SPG21	58.8715	56.9193	-0.048639	0.763704	HL60
ENSG00000090512	FETUB	0	0	0	NA	HL60
ENSG00000090520	DNAJB11	78.8768	86.6721	0.135945	0.0442899	HL60
ENSG00000090530	LEPREL1	0	0	0	0.42265	HL60
ENSG00000090534	THPO	0	0	0	NA	HL60
ENSG00000090539	CHRD	0	0	0	0.42265	HL60
ENSG00000090554	FLT3LG	1.93946	2.42326	0.319212	0.350358	HL60
ENSG00000090565	RAB11FIP3	4.36373	4.45531	0.0298708	0.474124	HL60
ENSG00000090581	GNPTG	48.439	49.7864	0.0395729	0.634632	HL60
ENSG00000090612	ZNF268	12.3348	13.5615	0.136638	0.0395903	HL60
ENSG00000090615	GOLGA3	16.33	15.038	-0.118811	0.766243	HL60
ENSG00000090621	PABPC4	110.606	133.313	0.26936	0.0245038	HL60
ENSG00000090659	CD209	0.395739	0.461881	0.21585	0.837815	HL60
ENSG00000090661	CERS4	0.921231	1.08666	0.234956	0.411974	HL60
ENSG00000090674	MCOLN1	9.94295	11.3184	0.18668	0.239822	HL60
ENSG00000090686	USP48	53.6738	55.1155	0.0382288	0.487319	HL60
ENSG00000090776	EFNB1	1.22679	0.793263	-0.620094	0.684307	HL60
ENSG00000090857	PDPR	40.7611	32.9009	-0.308947	0.112945	HL60
ENSG00000090861	AARS	75.4731	64.3088	-0.230898	0.101831	HL60
ENSG00000090863	GLG1	26.6391	24.6515	-0.111804	0.743161	HL60
ENSG00000090889	KIF4A	15.7579	15.5067	-0.0231662	0.620594	HL60
ENSG00000090905	TNRC6A	17.265	17.9596	0.0568622	0.602607	HL60
ENSG00000090920	FCGBP	0	0.0869329	2.842	0.0987195	HL60
ENSG00000090924	PLEKHG2	2.41482	2.68405	0.151659	0.4032	HL60
ENSG00000090932	DLL3	0.228172	0.315132	0.442494	0.414578	HL60
ENSG00000090971	NAT14	8.11912	8.62535	0.0871143	0.34499	HL60
ENSG00000090975	PITPNM2	0.684516	0.793263	0.208722	0.418977	HL60
ENSG00000090989	EXOC1	16.3882	13.9209	-0.23519	0.0612585	HL60
ENSG00000091009	RBM27	23.3387	22.8634	-0.0296699	0.583397	HL60
ENSG00000091010	POU4F3	0.0890413	0.084536	-0.0644434	0.813536	HL60
ENSG00000091039	OSBPL8	45.6386	37.8158	-0.271173	0.0166805	HL60
ENSG00000091073	DTX2	8.8987	8.46423	-0.0720988	0.648221	HL60
ENSG00000091106	NLRC4	0.931702	0.472622	-0.958455	0.00734961	HL60
ENSG00000091127	PUS7	33.9786	29.9256	-0.183166	0.0694611	HL60
ENSG00000091128	LAMB4	0.0989348	0.0939289	-0.0653565	0.956785	HL60
ENSG00000091129	NRCAM	0.560923	0.547812	-0.0332749	0.882392	HL60
ENSG00000091136	LAMB1	0	0.217332	4.03785	0.297105	HL60
ENSG00000091137	SLC26A4	0.237679	0.225429	-0.0719591	0.479291	HL60
ENSG00000091138	SLC26A3	0	0	0	NA	HL60
ENSG00000091140	DLD	89.9282	82.369	-0.126653	0.288596	HL60
ENSG00000091157	WDR7	7.98404	8.32459	0.060157	0.709602	HL60
ENSG00000091164	TXNL1	96.6323	102.581	0.0861722	0.697573	HL60
ENSG00000091181	IL5RA	0	0.300572	4.48113	0.46592	HL60
ENSG00000091262	ABCC6	0.19787	0.228199	0.19294	0.42324	HL60
ENSG00000091317	CMTM6	57.766	56.9617	-0.0202243	0.988128	HL60
ENSG00000091409	ITGA6	3.24194	3.46948	0.09745	0.491271	HL60
ENSG00000091428	RAPGEF4	0.445207	0.521598	0.221966	0.360304	HL60
ENSG00000091436	MLTK	21.5052	19.1842	-0.164656	0.734073	HL60
ENSG00000091482	SMPX	0	0	0	NA	HL60
ENSG00000091483	FH	113.37	104.146	-0.122415	0.126957	HL60
ENSG00000091490	SEL1L3	15.5252	15.6073	0.00760006	0.427117	HL60
ENSG00000091513	TF	0.572133	0.469644	-0.277235	0.481946	HL60
ENSG00000091527	CDV3	136.047	147.449	0.116096	0.109302	HL60
ENSG00000091536	MYO15A	0.534248	0.590778	0.141554	0.318126	HL60
ENSG00000091542	ALKBH5	14.7171	13.9093	-0.0813651	0.814042	HL60
ENSG00000091583	APOH	0	0	0	NA	HL60
ENSG00000091592	NLRP1	1.81051	1.87975	0.0537342	0.973808	HL60
ENSG00000091622	PITPNM3	0.178083	0.159679	-0.145232	0.559105	HL60
ENSG00000091640	SPAG7	29.7384	28.9374	-0.0393747	0.778987	HL60
ENSG00000091651	ORC6	56.3434	73.0631	0.374814	0.278411	HL60
ENSG00000091656	ZFHX4	0	0	0	NA	HL60
ENSG00000091664	SLC17A6	0	0	0	NA	HL60
ENSG00000091704	CPA1	0	0	0	NA	HL60
ENSG00000091732	ZC3HC1	20.8101	17.9274	-0.214961	0.492825	HL60
ENSG00000091831	ESR1	0	0	0	NA	HL60
ENSG00000091844	RGS17	0	0	0	0.773932	HL60
ENSG00000091879	ANGPT2	0	0	0	0.828449	HL60
ENSG00000091947	TMEM101	22.3692	22.6214	0.0161677	0.613522	HL60
ENSG00000091972	CD200	0	0.391198	4.84627	0.407289	HL60
ENSG00000091986	CCDC80	0.148402	0.15038	0.0174517	0.930594	HL60
ENSG00000092009	CMA1	0	0	0	0.42265	HL60
ENSG00000092010	PSME1	171.029	185.59	0.11787	0.0952714	HL60
ENSG00000092020	PPP2R3C	35.5758	36.263	0.0275916	0.388429	HL60
ENSG00000092036	HAUS4	52.2178	57.3699	0.135717	0.134558	HL60
ENSG00000092051	JPH4	0	0.0859313	2.82762	0.234809	HL60
ENSG00000092054	MYH7	0	0	0	0.42265	HL60
ENSG00000092067	CEBPE	80.1739	48.878	-0.713784	0.024357	HL60
ENSG00000092068	SLC7A8	3.32613	3.13649	-0.0843244	0.332288	HL60
ENSG00000092094	OSGEP	77.5289	75.5121	-0.0380184	0.620523	HL60
ENSG00000092096	SLC22A17	0	0	0	NA	HL60
ENSG00000092098	RNF31	23.9422	20.364	-0.233384	0.0401196	HL60
ENSG00000092108	SCFD1	33.1325	30.7956	-0.105473	0.124377	HL60
ENSG00000092140	G2E3	16.9227	13.9101	-0.282568	0.0327631	HL60
ENSG00000092148	HECTD1	29.7384	30.4626	0.0346978	0.874799	HL60
ENSG00000092199	HNRNPC	875.98	953.515	0.122355	0.592282	HL60
ENSG00000092200	RPGRIP1	0.665501	0.719675	0.11065	0.633259	HL60
ENSG00000092201	SUPT16H	155.879	120.207	-0.374877	0.00767575	HL60
ENSG00000092203	TOX4	48.8478	52.6379	0.107778	0.789135	HL60
ENSG00000092208	GEMIN2	15.0403	12.6104	-0.25396	0.117502	HL60
ENSG00000092295	TGM1	2.22468	2.21273	-0.00771815	0.59818	HL60
ENSG00000092330	TINF2	34.647	32.2135	-0.10502	0.119713	HL60
ENSG00000092345	DAZL	0	0	0	NA	HL60
ENSG00000092377	TBL1Y	0	0	0	0.9565	HL60
ENSG00000092421	SEMA6A	0	0	0	0.991474	HL60
ENSG00000092439	TRPM7	16.7231	15.5965	-0.100529	0.603386	HL60
ENSG00000092445	TYRO3	1.76488	2.04292	0.209506	0.294391	HL60
ENSG00000092470	WDR76	22.0661	19.2774	-0.194791	0.045098	HL60
ENSG00000092529	CAPN3	5.54035	6.0689	0.131139	0.179869	HL60
ENSG00000092531	SNAP23	31.6031	35.2103	0.155869	0.311101	HL60
ENSG00000092607	TBX15	0	0.15038	3.54514	0.471704	HL60
ENSG00000092621	PHGDH	51.832	48.6156	-0.0923956	0.528011	HL60
ENSG00000092758	COL9A3	0.874659	0.956262	0.126733	0.346771	HL60
ENSG00000092820	EZR	94.364	101.299	0.102291	0.581145	HL60
ENSG00000092841	MYL6	1076.56	1213.38	0.172594	0.260032	HL60
ENSG00000092847	EIF2C1	10.1309	8.93236	-0.181384	0.196431	HL60
ENSG00000092850	TEKT2	0.152115	0	-3.56028	0.185422	HL60
ENSG00000092853	CLSPN	20.8877	16.8318	-0.311231	0.00818089	HL60
ENSG00000092871	RFFL	12.9107	11.6222	-0.151512	0.0112897	HL60
ENSG00000092929	UNC13D	71.6524	65.3937	-0.131836	0.531974	HL60
ENSG00000092931	MFSD11	7.62198	9.07363	0.251088	0.224662	HL60
[truncated: 103,216 more rows]
