# Supplementary material for: Convergent organization of aberrant MYB complex controls oncogenic gene expression in acute myeloid leukemia
Source: eLife. 2021 Feb 2;10:e65905. doi: 10.7554/eLife.65905 (PMC7886351; doi:10.7554/eLife.65905)
Supplement: Figure 11—source data 1. [file elife-65905-fig11-data1.xlsx]

## Sheet: ChIPseqDESeq2FilteredNormalized
	ChIP_CEBPA_CRYBMIM_rep1_LF34	ChIP_CEBPA_CRYBMIM_rep2_LF35	ChIP_CEBPA_CRYBMIM_rep3_LF36	ChIP_CEBPA_PBS_rep1_LF31	ChIP_CEBPA_PBS_rep2_LF32	ChIP_CEBPA_PBS_rep3_LF33	ChIP_JUN_CRYBMIM_rep1_LF40	ChIP_JUN_CRYBMIM_rep2_LF41	ChIP_JUN_CRYBMIM_rep3_LF42	ChIP_JUN_PBS_rep1_LF37	ChIP_JUN_PBS_rep2_LF38	ChIP_JUN_PBS_rep3_LF39	ChIP_LYL1_CRYBMIM_rep1_LF16	ChIP_LYL1_CRYBMIM_rep2_LF17	ChIP_LYL1_CRYBMIM_rep3_LF18	ChIP_LYL1_PBS_rep1_LF13	ChIP_LYL1_PBS_rep2_LF14	ChIP_LYL1_PBS_rep3_LF15	ChIP_MYB_CRYBMIM_rep1_LF10	ChIP_MYB_CRYBMIM_rep2_LF11	ChIP_MYB_CRYBMIM_rep3_LF12	ChIP_MYB_PBS_rep1_LF7	ChIP_MYB_PBS_rep2_LF8	ChIP_MYB_PBS_rep3_LF9	ChIP_PU1_CRYBMIM_rep1_LF22	ChIP_PU1_CRYBMIM_rep2_LF23	ChIP_PU1_CRYBMIM_rep3_LF24	ChIP_PU1_PBS_rep1_LF19	ChIP_PU1_PBS_rep2_LF20	ChIP_PU1_PBS_rep3_LF21	ChIP_RUNX1_CRYBMIM_rep1_LF28	ChIP_RUNX1_CRYBMIM_rep2_LF29	ChIP_RUNX1_CRYBMIM_rep3_LF30	ChIP_RUNX1_PBS_rep1_LF25	ChIP_RUNX1_PBS_rep2_LF26	ChIP_RUNX1_PBS_rep3_LF27
chr1_651710_651930	1.13295	1.00786	0	0	0.885862	0.910987	0	0.907174	1.70691	0.92156	1.8333	0	0	0	3.40208	0.986915	0	0	0	0	0	0.845832	0.932628	0.958846	1.02691	0	0	0.864408	0.886989	0	0.829463	0	0.841135	0	0	1.16907
chr1_1147238_1147438	2.26591	3.02357	3.55191	4.95661	2.65759	3.64395	0.972427	3.62869	2.56036	3.68624	2.74995	13.9853	1.23087	2.93318	2.55156	4.93457	7.36966	1.76774	3.25146	1.01652	4.43151	2.5375	1.86526	3.83538	4.10765	9.96725	2.99247	5.18645	1.77398	2.96087	1.65893	2.22001	3.36454	3.25237	4.6222	1.16907
chr1_1362680_1362922	12.4625	6.04714	16.8716	18.1742	15.0597	6.37691	11.6691	17.2363	5.97418	6.45092	8.24986	11.1883	8.6161	7.82182	19.562	14.8037	9.82622	7.95482	8.67057	13.2148	8.86302	12.6875	10.2589	9.58846	11.296	6.64483	6.98242	13.8305	14.1918	8.88261	9.95356	8.88006	15.9816	9.75711	8.31996	15.1979
chr1_1580518_1580718	3.39886	0	2.66393	3.30441	4.42931	2.73296	0.972427	1.81435	0	0	0	0.932354	0	0	0.85052	0.986915	1.22828	0.883869	1.08382	4.0661	4.43151	2.5375	0.932628	0.958846	1.02691	5.53736	2.99247	3.45763	0.886989	2.96087	1.65893	0.740005	3.36454	3.25237	2.77332	1.16907
chr1_4198191_4198391	3.39886	3.02357	1.77596	5.78271	4.42931	5.46592	1.94485	3.62869	5.12073	5.52936	4.58326	4.66177	0	1.95545	2.55156	1.97383	2.45655	0	5.4191	1.01652	3.32363	4.22916	2.79788	0.958846	3.08074	2.21494	11.9699	1.72882	3.54796	1.97391	1.65893	4.44003	1.68227	4.06546	3.69776	1.16907
chr1_5788482_5788682	7.93068	3.02357	1.77596	5.78271	4.42931	5.46592	2.91728	3.62869	14.5087	0.92156	3.66661	2.79706	2.46174	3.91091	4.2526	0.986915	4.91311	3.53548	1.08382	5.08262	4.43151	1.69166	1.86526	1.91769	2.05382	2.21494	2.99247	6.05086	3.54796	1.97391	11.6125	3.70002	5.04681	2.43928	6.47108	3.5072
chr1_7987550_7987750	13.5955	5.03928	6.21585	5.78271	4.42931	4.55493	0	0.907174	0.853455	0.92156	3.66661	0.932354	4.92348	3.91091	3.40208	4.93457	6.14139	1.76774	1.08382	3.04957	1.10788	0.845832	4.66314	0	2.05382	1.10747	0.997489	2.59323	1.77398	4.93478	4.97678	4.44003	2.5234	4.06546	4.6222	2.33813
chr1_8437134_8437438	2.26591	8.06285	3.55191	7.43492	3.54345	0.910987	4.86213	5.44304	14.5087	3.68624	2.74995	4.66177	6.15435	3.91091	10.2062	2.96074	1.22828	6.18708	3.25146	7.11567	4.43151	6.76666	4.66314	1.91769	5.13456	2.21494	6.98242	5.18645	0.886989	0.986956	4.97678	6.66004	5.88794	4.87855	6.47108	1.16907
chr1_8789672_8789872	4.53182	5.03928	6.21585	3.30441	4.42931	4.55493	2.91728	3.62869	1.70691	5.52936	3.66661	2.79706	4.92348	0.977727	3.40208	2.96074	6.14139	4.41934	2.16764	3.04957	4.43151	1.69166	4.66314	5.75308	4.10765	2.21494	11.9699	1.72882	9.75688	3.94782	0.829463	2.22001	1.68227	4.87855	5.54664	5.84534
chr1_9797138_9797456	2.26591	2.01571	8.87978	4.13051	6.20104	1.82197	3.88971	8.16456	5.12073	4.6078	8.24986	4.66177	2.46174	6.84409	5.95364	4.93457	3.68483	1.76774	7.58674	3.04957	5.53938	3.38333	3.73051	6.71192	6.16147	4.42989	4.98744	5.18645	0.886989	17.7652	6.6357	4.44003	5.04681	3.25237	5.54664	0
chr1_10904339_10904539	2.26591	6.04714	8.87978	4.95661	3.54345	0.910987	12.6415	2.72152	5.97418	3.68624	1.8333	3.72942	2.46174	6.84409	5.95364	2.96074	2.45655	1.76774	1.08382	2.03305	5.53938	1.69166	3.73051	1.91769	4.10765	1.10747	0.997489	3.45763	6.20893	4.93478	4.14732	5.92004	5.88794	6.50474	2.77332	3.5072
chr1_12178404_12178604	2.26591	3.02357	2.66393	6.60881	3.54345	5.46592	1.94485	3.62869	3.41382	3.68624	2.74995	5.59413	3.69261	3.91091	4.2526	4.93457	3.68483	4.41934	14.0897	8.1322	1.10788	3.38333	5.59577	2.87654	4.10765	4.42989	3.98995	4.32204	6.20893	1.97391	2.48839	4.44003	4.20567	3.25237	3.69776	5.84534
chr1_12374541_12374741	4.53182	0	14.2077	2.47831	4.42931	6.37691	2.91728	3.62869	5.12073	5.52936	3.66661	2.79706	6.15435	4.88863	5.95364	5.92149	4.91311	2.65161	2.16764	3.04957	1.10788	4.22916	6.5284	4.79423	3.08074	7.75231	2.99247	2.59323	6.20893	2.96087	6.6357	6.66004	5.88794	0.813092	9.2444	4.67627
chr1_12921292_12921492	0	1.00786	1.77596	2.47831	3.54345	4.55493	2.91728	4.53587	6.82764	3.68624	2.74995	4.66177	4.92348	0	4.2526	3.94766	1.22828	0	4.33528	4.0661	3.32363	1.69166	0.932628	0.958846	2.05382	6.64483	4.98744	0.864408	4.43495	2.96087	4.14732	1.48001	3.36454	3.25237	0	8.18347
chr1_12924325_12924525	5.66477	5.03928	4.43989	3.30441	4.42931	6.37691	6.80699	9.07174	4.26727	7.37248	11.9165	2.79706	3.69261	5.86636	7.65468	3.94766	3.68483	7.95482	3.25146	6.09915	6.64726	8.45832	8.39365	4.79423	3.08074	3.32242	4.98744	6.91527	5.32194	5.92174	4.97678	5.18003	2.5234	8.94402	2.77332	3.5072
chr1_12947073_12947273	0	1.00786	1.77596	4.13051	3.54345	10.0209	1.94485	1.81435	0	0	2.74995	3.72942	4.92348	2.93318	2.55156	1.97383	1.22828	1.76774	0	1.01652	0	0.845832	6.5284	1.91769	2.05382	2.21494	1.99498	4.32204	3.54796	3.94782	4.97678	2.96002	4.20567	4.06546	0.92444	2.33813
chr1_12949687_12949887	10.1966	7.055	5.32787	10.7393	6.20104	5.46592	6.80699	3.62869	10.2415	8.29404	6.41656	9.32354	8.6161	2.93318	11.9073	5.92149	3.68483	3.53548	7.58674	10.1652	8.86302	4.22916	6.5284	10.5473	11.296	4.42989	6.98242	4.32204	6.20893	7.89565	9.95356	5.18003	10.0936	7.31783	7.39552	7.0144
chr1_15743586_15743786	2.26591	1.00786	3.55191	0.826102	6.20104	2.73296	1.94485	2.72152	5.12073	5.52936	3.66661	2.79706	2.46174	2.93318	1.70104	0.986915	1.22828	2.65161	13.0058	4.0661	4.43151	5.07499	1.86526	3.83538	6.16147	5.53736	0.997489	4.32204	2.66097	1.97391	0.829463	2.22001	5.04681	3.25237	0.92444	4.67627
chr1_15850187_15850387	4.53182	7.055	13.3197	4.95661	5.31517	2.73296	3.88971	4.53587	5.12073	0.92156	3.66661	3.72942	3.69261	4.88863	1.70104	3.94766	3.68483	2.65161	3.25146	3.04957	9.97089	6.76666	4.66314	2.87654	6.16147	4.42989	2.99247	6.05086	2.66097	4.93478	5.80624	2.96002	3.36454	0.813092	7.39552	5.84534
chr1_16862399_16862627	11.3295	10.0786	7.10383	10.7393	13.2879	5.46592	12.6415	5.44304	11.9484	11.9803	10.0832	13.9853	12.3087	9.77727	11.0568	10.8561	14.7393	10.6064	14.0897	11.1818	8.86302	9.30416	19.5852	14.3827	10.2691	14.3971	9.97489	15.5594	10.6439	9.86956	11.6125	9.62006	8.41135	17.0749	9.2444	14.0288
chr1_17074898_17075106	1.13295	4.03143	1.77596	5.78271	6.20104	8.19888	1.94485	6.35022	3.41382	1.84312	8.24986	2.79706	8.6161	2.93318	4.2526	8.88223	12.2828	4.41934	8.67057	4.0661	4.43151	5.07499	2.79788	7.67077	3.08074	4.42989	0	1.72882	7.09591	8.88261	4.14732	2.96002	5.04681	8.13092	4.6222	5.84534
chr1_17176602_17176841	4.53182	4.03143	5.32787	4.95661	5.31517	4.55493	2.91728	4.53587	7.68109	7.37248	3.66661	5.59413	2.46174	4.88863	4.2526	6.9084	6.14139	7.07095	3.25146	7.11567	1.10788	4.22916	2.79788	1.91769	8.2153	5.53736	6.98242	6.91527	2.66097	3.94782	3.31785	5.92004	5.04681	1.62618	7.39552	7.0144
chr1_19465872_19466072	1.13295	2.01571	2.66393	2.47831	4.42931	2.73296	1.94485	2.72152	11.9484	1.84312	3.66661	0	8.6161	2.93318	5.10312	2.96074	1.22828	3.53548	4.33528	6.09915	1.10788	1.69166	1.86526	4.79423	6.16147	3.32242	5.98493	2.59323	4.43495	2.96087	3.31785	3.70002	1.68227	0.813092	4.6222	4.67627
chr1_19480943_19481202	5.66477	3.02357	0.887978	4.95661	5.31517	1.82197	4.86213	4.53587	5.97418	0.92156	4.58326	4.66177	2.46174	4.88863	15.3094	1.97383	4.91311	4.41934	0	2.03305	3.32363	3.38333	8.39365	2.87654	5.13456	2.21494	2.99247	8.64408	2.66097	4.93478	4.97678	3.70002	4.20567	5.69165	2.77332	4.67627
chr1_19834633_19834857	4.53182	5.03928	1.77596	17.3481	5.31517	6.37691	2.91728	4.53587	5.12073	7.37248	3.66661	2.79706	6.15435	1.95545	5.10312	3.94766	3.68483	2.65161	5.4191	2.03305	4.43151	3.38333	5.59577	8.62962	7.18839	5.53736	3.98995	6.05086	4.43495	1.97391	2.48839	9.62006	6.72908	3.25237	3.69776	7.0144
chr1_21680672_21680872	3.39886	1.00786	3.55191	1.6522	3.54345	0.910987	3.88971	4.53587	3.41382	6.45092	0.916652	3.72942	7.38523	5.86636	3.40208	1.97383	1.22828	2.65161	2.16764	7.11567	2.21575	5.92083	1.86526	3.83538	5.13456	3.32242	3.98995	5.18645	2.66097	4.93478	2.48839	2.22001	5.04681	4.87855	2.77332	15.1979
chr1_22087299_22087499	4.53182	1.00786	1.77596	4.13051	4.42931	7.28789	5.83456	2.72152	3.41382	3.68624	2.74995	3.72942	1.23087	2.93318	4.2526	5.92149	7.36966	5.30321	3.25146	2.03305	4.43151	2.5375	6.5284	6.71192	12.3229	5.53736	2.99247	5.18645	7.9829	3.94782	1.65893	7.40005	6.72908	9.75711	4.6222	0
chr1_22141872_22142072	6.79773	5.03928	0.887978	5.78271	1.77172	3.64395	0	3.62869	3.41382	3.68624	0.916652	12.1206	0	2.93318	4.2526	2.96074	3.68483	7.07095	3.25146	3.04957	2.21575	2.5375	6.5284	6.71192	5.13456	3.32242	2.99247	3.45763	1.77398	8.88261	2.48839	5.92004	5.04681	7.31783	4.6222	3.5072
chr1_22229824_22230035	1.13295	2.01571	3.55191	3.30441	4.42931	3.64395	2.91728	3.62869	2.56036	2.76468	3.66661	5.59413	2.46174	1.95545	3.40208	4.93457	2.45655	6.18708	4.33528	4.0661	3.32363	1.69166	2.79788	3.83538	5.13456	15.5046	4.98744	4.32204	4.43495	2.96087	3.31785	5.18003	3.36454	5.69165	4.6222	3.5072
chr1_23142903_23143103	0	5.03928	3.55191	6.60881	4.42931	5.46592	12.6415	5.44304	4.26727	3.68624	5.49991	2.79706	0	3.91091	4.2526	2.96074	0	7.07095	4.33528	2.03305	7.75514	0.845832	2.79788	2.87654	1.02691	4.42989	1.99498	0.864408	2.66097	2.96087	4.97678	2.22001	1.68227	4.87855	3.69776	2.33813
chr1_23204352_23204587	4.53182	3.02357	1.77596	4.13051	2.65759	4.55493	0	2.72152	1.70691	7.37248	2.74995	1.86471	1.23087	3.91091	2.55156	2.96074	6.14139	5.30321	4.33528	4.0661	3.32363	5.92083	1.86526	1.91769	14.3768	4.42989	6.98242	1.72882	4.43495	3.94782	1.65893	2.22001	5.88794	4.87855	3.69776	3.5072
chr1_23489145_23489345	2.26591	2.01571	1.77596	2.47831	4.42931	0	3.88971	4.53587	6.82764	5.52936	0.916652	7.45883	1.23087	2.93318	3.40208	4.93457	1.22828	6.18708	4.33528	7.11567	2.21575	2.5375	5.59577	2.87654	12.3229	5.53736	1.99498	3.45763	2.66097	5.92174	2.48839	2.22001	1.68227	5.69165	4.6222	3.5072
chr1_24538652_24538869	11.3295	4.03143	3.55191	1.6522	3.54345	7.28789	4.86213	5.44304	5.12073	9.2156	4.58326	3.72942	3.69261	2.93318	4.2526	2.96074	7.36966	7.95482	0	6.09915	3.32363	8.45832	0.932628	3.83538	7.18839	3.32242	7.97991	5.18645	0.886989	4.93478	4.14732	5.92004	4.20567	4.06546	3.69776	2.33813
chr1_24923155_24923382	5.66477	5.03928	1.77596	5.78271	5.31517	6.37691	3.88971	3.62869	4.26727	1.84312	3.66661	0.932354	3.69261	5.86636	2.55156	2.96074	2.45655	4.41934	4.33528	5.08262	1.10788	4.22916	5.59577	2.87654	5.13456	3.32242	12.9674	0	3.54796	1.97391	5.80624	3.70002	0.841135	4.87855	5.54664	2.33813
chr1_25071627_25071859	10.1966	19.1493	12.4317	5.78271	4.42931	8.19888	7.77942	6.35022	6.82764	11.9803	10.9998	7.45883	7.38523	5.86636	6.80416	7.89532	4.91311	6.18708	4.33528	6.09915	6.64726	9.30416	11.1915	5.75308	13.3499	2.21494	9.97489	6.05086	7.09591	6.90869	10.783	5.18003	9.25248	4.87855	2.77332	5.84534
chr1_25440869_25441096	1.13295	2.01571	3.55191	5.78271	3.54345	14.5758	4.86213	2.72152	3.41382	2.76468	3.66661	1.86471	6.15435	6.84409	3.40208	2.96074	3.68483	0	3.25146	2.03305	1.10788	0.845832	5.59577	4.79423	5.13456	2.21494	8.9774	5.18645	4.43495	4.93478	3.31785	5.18003	3.36454	4.06546	4.6222	3.5072
chr1_26758328_26758592	5.66477	8.06285	5.32787	6.60881	5.31517	5.46592	12.6415	6.35022	4.26727	9.2156	5.49991	9.32354	7.38523	5.86636	3.40208	5.92149	6.14139	5.30321	6.50292	3.04957	3.32363	5.07499	7.46102	3.83538	4.10765	4.42989	4.98744	7.77968	6.20893	15.7913	7.46517	9.62006	5.04681	6.50474	7.39552	2.33813
chr1_27560920_27561139	7.93068	10.0786	5.32787	8.26102	7.97276	7.28789	11.6691	4.53587	14.5087	7.37248	3.66661	4.66177	6.15435	7.82182	5.95364	9.86915	4.91311	12.3742	4.33528	6.09915	1.10788	6.76666	6.5284	8.62962	7.18839	3.32242	7.97991	7.77968	9.75688	10.8565	4.14732	5.18003	9.25248	5.69165	7.39552	9.35254
chr1_27664836_27665156	4.53182	5.03928	2.66393	5.78271	4.42931	3.64395	2.91728	4.53587	3.41382	5.52936	3.66661	3.72942	2.46174	5.86636	3.40208	1.97383	6.14139	7.95482	2.16764	5.08262	17.726	4.22916	6.5284	2.87654	3.08074	4.42989	5.98493	1.72882	5.32194	6.90869	2.48839	5.18003	3.36454	4.06546	3.69776	2.33813
chr1_31222663_31222863	1.13295	5.03928	7.10383	2.47831	3.54345	0	1.94485	1.81435	2.56036	2.76468	4.58326	2.79706	1.23087	3.91091	2.55156	2.96074	3.68483	2.65161	1.08382	4.0661	2.21575	2.5375	0.932628	3.83538	0	1.10747	11.9699	2.59323	2.66097	2.96087	2.48839	4.44003	7.57021	2.43928	2.77332	3.5072
chr1_31406510_31406814	6.79773	2.01571	5.32787	7.43492	2.65759	5.46592	1.94485	9.07174	0.853455	0.92156	5.49991	2.79706	6.15435	4.88863	3.40208	1.97383	4.91311	6.18708	2.16764	4.0661	4.43151	3.38333	4.66314	4.79423	15.4037	6.64483	5.98493	3.45763	3.54796	2.96087	7.46517	5.18003	5.04681	4.87855	4.6222	3.5072
chr1_33592950_33593213	2.26591	7.055	9.76776	4.95661	10.6303	5.46592	4.86213	13.6076	7.68109	9.2156	5.49991	9.32354	8.6161	4.88863	16.1599	4.93457	11.0545	7.95482	9.75439	7.11567	6.64726	1.69166	7.46102	4.79423	7.18839	3.32242	1.99498	6.05086	3.54796	5.92174	13.2714	4.44003	9.25248	3.25237	9.2444	9.35254
chr1_35139683_35139883	1.13295	3.02357	7.10383	4.13051	4.42931	4.55493	13.614	1.81435	5.97418	2.76468	1.8333	0	3.69261	0.977727	4.2526	4.93457	7.36966	2.65161	2.16764	6.09915	2.21575	4.22916	2.79788	0.958846	8.2153	2.21494	0.997489	0.864408	0.886989	5.92174	0.829463	3.70002	4.20567	4.06546	7.39552	4.67627
chr1_36115211_36115411	1.13295	2.01571	7.10383	3.30441	1.77172	2.73296	5.83456	6.35022	3.41382	3.68624	3.66661	2.79706	2.46174	6.84409	3.40208	5.92149	4.91311	2.65161	16.2573	5.08262	5.53938	3.38333	6.5284	5.75308	3.08074	1.10747	1.99498	5.18645	2.66097	8.88261	4.97678	0	3.36454	2.43928	4.6222	1.16907
chr1_38632347_38632547	1.13295	4.03143	2.66393	2.47831	0.885862	4.55493	11.6691	2.72152	5.97418	2.76468	6.41656	2.79706	3.69261	5.86636	5.10312	2.96074	11.0545	4.41934	1.08382	4.0661	3.32363	5.07499	3.73051	1.91769	2.05382	4.42989	4.98744	2.59323	5.32194	3.94782	3.31785	0.740005	8.41135	2.43928	1.84888	3.5072
chr1_38761093_38761397	3.39886	9.07071	3.55191	5.78271	1.77172	1.82197	4.86213	4.53587	7.68109	4.6078	2.74995	3.72942	4.92348	5.86636	2.55156	3.94766	4.91311	2.65161	1.08382	5.08262	6.64726	5.07499	2.79788	0.958846	14.3768	4.42989	5.98493	6.05086	6.20893	5.92174	4.14732	0.740005	2.5234	1.62618	2.77332	5.84534
chr1_39476891_39477091	6.79773	2.01571	3.55191	4.95661	2.65759	5.46592	1.94485	5.44304	3.41382	5.52936	4.58326	4.66177	6.15435	1.95545	11.9073	2.96074	6.14139	5.30321	0	4.0661	1.10788	4.22916	1.86526	4.79423	3.08074	3.32242	0.997489	4.32204	5.32194	3.94782	4.97678	5.18003	3.36454	5.69165	5.54664	2.33813
chr1_40527759_40527986	5.66477	2.01571	2.66393	3.30441	1.77172	4.55493	2.91728	6.35022	4.26727	4.6078	4.58326	4.66177	1.23087	2.93318	2.55156	4.93457	3.68483	7.07095	5.4191	5.08262	6.64726	2.5375	6.5284	5.75308	3.08074	3.32242	1.99498	3.45763	0.886989	4.93478	4.97678	2.96002	1.68227	1.62618	4.6222	16.3669
chr1_40641940_40642193	4.53182	4.03143	4.43989	6.60881	3.54345	5.46592	3.88971	6.35022	5.97418	5.52936	3.66661	14.9177	1.23087	1.95545	6.80416	2.96074	3.68483	7.07095	7.58674	9.14872	6.64726	5.92083	6.5284	11.5062	6.16147	6.64483	3.98995	4.32204	4.43495	5.92174	4.14732	5.18003	9.25248	1.62618	6.47108	2.33813
chr1_40937485_40937761	3.39886	2.01571	7.10383	9.91322	5.31517	2.73296	1.94485	3.62869	7.68109	4.6078	7.33321	8.39119	6.15435	5.86636	6.80416	6.9084	7.36966	2.65161	6.50292	9.14872	7.75514	4.22916	6.5284	4.79423	5.13456	3.32242	17.9548	8.64408	5.32194	0.986956	4.97678	5.18003	4.20567	8.94402	3.69776	0
chr1_41094901_41095112	4.53182	4.03143	2.66393	4.13051	5.31517	14.5758	2.91728	2.72152	1.70691	2.76468	2.74995	4.66177	1.23087	1.95545	2.55156	0.986915	6.14139	0.883869	5.4191	3.04957	2.21575	3.38333	6.5284	4.79423	3.08074	1.10747	4.98744	4.32204	4.43495	0.986956	2.48839	3.70002	2.5234	5.69165	0	1.16907
chr1_41900631_41900850	2.26591	6.04714	3.55191	4.13051	2.65759	10.9318	6.80699	3.62869	5.12073	3.68624	3.66661	5.59413	3.69261	2.93318	3.40208	2.96074	3.68483	1.76774	7.58674	2.03305	2.21575	2.5375	2.79788	3.83538	4.10765	3.32242	1.99498	5.18645	4.43495	2.96087	9.12409	2.22001	3.36454	3.25237	2.77332	1.16907
chr1_42185005_42185205	5.66477	1.00786	2.66393	2.47831	1.77172	10.0209	1.94485	5.44304	5.12073	3.68624	1.8333	1.86471	1.23087	4.88863	2.55156	0.986915	1.22828	2.65161	5.4191	2.03305	3.32363	5.92083	4.66314	3.83538	12.3229	3.32242	1.99498	5.18645	4.43495	2.96087	3.31785	3.70002	1.68227	0.813092	5.54664	2.33813
chr1_44495925_44496128	6.79773	3.02357	5.32787	3.30441	2.65759	5.46592	4.86213	15.422	3.41382	3.68624	5.49991	5.59413	4.92348	7.82182	5.10312	4.93457	2.45655	1.76774	6.50292	7.11567	3.32363	4.22916	6.5284	6.71192	6.16147	12.1822	4.98744	6.05086	6.20893	3.94782	6.6357	6.66004	2.5234	5.69165	6.47108	4.67627
chr1_44840364_44840570	4.53182	2.01571	4.43989	5.78271	7.97276	4.55493	14.5864	5.44304	6.82764	4.6078	7.33321	4.66177	4.92348	2.93318	1.70104	2.96074	4.91311	0.883869	4.33528	2.03305	1.10788	5.07499	7.46102	3.83538	2.05382	4.42989	0.997489	3.45763	5.32194	2.96087	4.14732	4.44003	5.88794	3.25237	2.77332	1.16907
chr1_45411381_45411599	2.26591	3.02357	3.55191	4.13051	5.31517	7.28789	5.83456	2.72152	12.8018	4.6078	3.66661	4.66177	2.46174	3.91091	2.55156	1.97383	6.14139	2.65161	8.67057	6.09915	6.64726	2.5375	5.59577	2.87654	7.18839	1.10747	1.99498	4.32204	9.75688	2.96087	4.97678	3.70002	1.68227	3.25237	5.54664	7.0144
chr1_45792772_45792972	2.26591	7.055	6.21585	5.78271	7.0869	4.55493	2.91728	8.16456	2.56036	3.68624	5.49991	3.72942	6.15435	5.86636	0	2.96074	4.91311	6.18708	6.50292	3.04957	2.21575	5.07499	3.73051	2.87654	3.08074	3.32242	2.99247	3.45763	4.43495	4.93478	3.31785	2.96002	5.04681	0	5.54664	15.1979
chr1_46707344_46707579	7.93068	2.01571	2.66393	2.47831	3.54345	4.55493	1.94485	5.44304	3.41382	5.52936	2.74995	0	7.38523	5.86636	2.55156	1.97383	1.22828	2.65161	3.25146	2.03305	5.53938	2.5375	0.932628	1.91769	1.02691	8.85978	5.98493	6.05086	2.66097	2.96087	1.65893	3.70002	2.5234	3.25237	3.69776	0
chr1_47146006_47146251	0	1.00786	7.9918	4.95661	4.42931	3.64395	1.94485	5.44304	1.70691	7.37248	7.33321	3.72942	6.15435	2.93318	1.70104	2.96074	2.45655	3.53548	6.50292	3.04957	5.53938	3.38333	4.66314	6.71192	5.13456	3.32242	0	6.05086	5.32194	5.92174	4.14732	4.44003	1.68227	2.43928	6.47108	16.3669
chr1_48764231_48764431	5.66477	5.03928	0.887978	1.6522	6.20104	12.7538	3.88971	2.72152	5.97418	7.37248	1.8333	0.932354	1.23087	3.91091	1.70104	4.93457	2.45655	4.41934	6.50292	1.01652	2.21575	2.5375	0.932628	8.62962	5.13456	4.42989	2.99247	2.59323	6.20893	0.986956	4.14732	4.44003	5.04681	5.69165	8.31996	3.5072
chr1_49082905_49083105	5.66477	6.04714	5.32787	2.47831	5.31517	5.46592	3.88971	2.72152	4.26727	4.6078	2.74995	6.52648	16.0013	1.95545	1.70104	3.94766	2.45655	7.07095	4.33528	5.08262	8.86302	3.38333	6.5284	4.79423	5.13456	5.53736	2.99247	7.77968	3.54796	4.93478	3.31785	4.44003	5.04681	3.25237	5.54664	4.67627
chr1_49718805_49719038	1.13295	2.01571	15.0956	4.13051	2.65759	2.73296	3.88971	3.62869	5.12073	3.68624	6.41656	2.79706	7.38523	7.82182	3.40208	4.93457	6.14139	6.18708	4.33528	2.03305	4.43151	3.38333	2.79788	4.79423	1.02691	3.32242	2.99247	3.45763	5.32194	3.94782	3.31785	4.44003	7.57021	2.43928	3.69776	3.5072
chr1_51789384_51789584	3.39886	5.03928	4.43989	4.13051	6.20104	1.82197	2.91728	8.16456	5.97418	3.68624	4.58326	3.72942	4.92348	7.82182	7.65468	10.8561	3.68483	2.65161	2.16764	2.03305	4.43151	5.07499	5.59577	5.75308	3.08074	8.85978	11.9699	4.32204	1.77398	4.93478	1.65893	7.40005	2.5234	3.25237	2.77332	3.5072
chr1_52023173_52023373	1.13295	5.03928	5.32787	4.13051	4.42931	0.910987	5.83456	2.72152	0.853455	6.45092	1.8333	1.86471	4.92348	2.93318	2.55156	6.9084	7.36966	5.30321	13.0058	1.01652	5.53938	4.22916	3.73051	5.75308	6.16147	3.32242	2.99247	3.45763	6.20893	2.96087	2.48839	2.96002	3.36454	4.06546	4.6222	0
chr1_52253842_52254042	1.13295	5.03928	1.77596	2.47831	4.42931	3.64395	1.94485	1.81435	4.26727	3.68624	6.41656	3.72942	3.69261	1.95545	0	2.96074	4.91311	3.53548	6.50292	3.04957	0	4.22916	1.86526	2.87654	13.3499	3.32242	1.99498	0	4.43495	4.93478	1.65893	4.44003	2.5234	2.43928	2.77332	1.16907
chr1_54561629_54561862	4.53182	6.04714	4.43989	6.60881	6.20104	2.73296	0	2.72152	5.12073	1.84312	4.58326	1.86471	3.69261	3.91091	2.55156	7.89532	7.36966	5.30321	3.25146	5.08262	4.43151	6.76666	5.59577	4.79423	2.05382	2.21494	13.9648	5.18645	4.43495	3.94782	3.31785	5.92004	3.36454	2.43928	1.84888	1.16907
chr1_54796480_54796758	6.79773	1.00786	2.66393	7.43492	7.0869	4.55493	6.80699	6.35022	8.53455	2.76468	3.66661	1.86471	19.6939	5.86636	2.55156	5.92149	6.14139	0.883869	3.25146	7.11567	1.10788	4.22916	0.932628	1.91769	3.08074	7.75231	5.98493	4.32204	7.09591	6.90869	7.46517	2.96002	4.20567	5.69165	1.84888	2.33813
chr1_55085487_55085687	1.13295	3.02357	3.55191	4.13051	1.77172	2.73296	11.6691	6.35022	2.56036	2.76468	4.58326	4.66177	4.92348	4.88863	0	0.986915	2.45655	5.30321	1.08382	5.08262	3.32363	1.69166	3.73051	2.87654	6.16147	5.53736	0.997489	3.45763	3.54796	2.96087	6.6357	4.44003	3.36454	3.25237	8.31996	4.67627
chr1_55117057_55117257	1.13295	4.03143	2.66393	4.95661	2.65759	3.64395	3.88971	0.907174	1.70691	2.76468	2.74995	3.72942	3.69261	0.977727	2.55156	2.96074	2.45655	7.07095	4.33528	5.08262	5.53938	2.5375	3.73051	2.87654	13.3499	1.10747	0	1.72882	3.54796	3.94782	1.65893	4.44003	2.5234	4.87855	6.47108	5.84534
chr1_59414855_59415090	13.5955	5.03928	5.32787	4.95661	0	4.55493	4.86213	2.72152	6.82764	1.84312	3.66661	1.86471	2.46174	4.88863	2.55156	4.93457	3.68483	0	3.25146	7.11567	4.43151	3.38333	5.59577	3.83538	4.10765	3.32242	2.99247	0.864408	3.54796	4.93478	1.65893	2.22001	1.68227	0	3.69776	5.84534
chr1_59792597_59792832	5.66477	6.04714	3.55191	4.95661	6.20104	2.73296	1.94485	2.72152	4.26727	5.52936	2.74995	1.86471	2.46174	3.91091	1.70104	5.92149	2.45655	1.76774	1.08382	1.01652	3.32363	3.38333	2.79788	0	15.4037	4.42989	2.99247	2.59323	2.66097	2.96087	4.14732	1.48001	4.20567	2.43928	5.54664	1.16907
chr1_61030736_61031008	3.39886	6.04714	2.66393	4.13051	7.97276	4.55493	4.86213	6.35022	5.97418	4.6078	6.41656	6.52648	7.38523	4.88863	13.6083	2.96074	6.14139	4.41934	3.25146	3.04957	4.43151	5.92083	4.66314	2.87654	4.10765	3.32242	5.98493	2.59323	7.09591	3.94782	3.31785	2.96002	6.72908	1.62618	2.77332	5.84534
chr1_61042696_61042918	14.7284	4.03143	5.32787	4.95661	5.31517	6.37691	4.86213	3.62869	5.12073	3.68624	4.58326	6.52648	1.23087	2.93318	2.55156	4.93457	3.68483	3.53548	1.08382	4.0661	1.10788	7.61249	2.79788	0.958846	3.08074	4.42989	6.98242	4.32204	5.32194	4.93478	4.14732	1.48001	3.36454	4.06546	3.69776	2.33813
chr1_62943019_62943219	1.13295	3.02357	1.77596	3.30441	1.77172	3.64395	13.614	1.81435	3.41382	4.6078	3.66661	2.79706	4.92348	5.86636	0.85052	4.93457	2.45655	1.76774	4.33528	2.03305	3.32363	5.07499	4.66314	1.91769	5.13456	2.21494	1.99498	5.18645	1.77398	0.986956	3.31785	3.70002	4.20567	4.06546	3.69776	3.5072
chr1_65121389_65121589	3.39886	7.055	5.32787	3.30441	0.885862	2.73296	6.80699	0.907174	1.70691	1.84312	3.66661	2.79706	3.69261	1.95545	5.95364	3.94766	0	4.41934	4.33528	2.03305	0	4.22916	2.79788	3.83538	1.02691	4.42989	13.9648	1.72882	6.20893	2.96087	4.97678	4.44003	3.36454	7.31783	5.54664	4.67627
chr1_66351925_66352125	1.13295	3.02357	0.887978	6.60881	3.54345	4.55493	3.88971	1.81435	3.41382	0.92156	4.58326	0.932354	6.15435	7.82182	3.40208	1.97383	4.91311	2.65161	13.0058	7.11567	1.10788	1.69166	4.66314	4.79423	5.13456	3.32242	3.98995	5.18645	2.66097	3.94782	3.31785	2.96002	1.68227	1.62618	3.69776	5.84534
chr1_66879588_66879788	14.7284	0	1.77596	2.47831	9.74449	5.46592	1.94485	1.81435	1.70691	3.68624	2.74995	0.932354	2.46174	3.91091	5.10312	3.94766	4.91311	5.30321	4.33528	4.0661	3.32363	4.22916	1.86526	1.91769	8.2153	5.53736	6.98242	0	4.43495	4.93478	2.48839	5.18003	3.36454	3.25237	1.84888	1.16907
chr1_67299899_67300139	2.26591	5.03928	1.77596	3.30441	5.31517	5.46592	2.91728	2.72152	17.9225	3.68624	2.74995	1.86471	7.38523	7.82182	7.65468	2.96074	3.68483	2.65161	3.25146	1.01652	3.32363	2.5375	1.86526	2.87654	1.02691	2.21494	2.99247	3.45763	8.86989	2.96087	4.97678	6.66004	0.841135	1.62618	7.39552	4.67627
chr1_67513168_67513389	1.13295	2.01571	5.32787	2.47831	4.42931	2.73296	15.5588	3.62869	2.56036	6.45092	8.24986	3.72942	3.69261	2.93318	2.55156	3.94766	4.91311	2.65161	3.25146	4.0661	1.10788	4.22916	4.66314	3.83538	4.10765	2.21494	6.98242	2.59323	2.66097	6.90869	3.31785	5.92004	0.841135	2.43928	6.47108	3.5072
chr1_67519974_67520174	13.5955	2.01571	2.66393	6.60881	3.54345	5.46592	6.80699	1.81435	3.41382	3.68624	3.66661	3.72942	3.69261	2.93318	2.55156	5.92149	4.91311	5.30321	3.25146	2.03305	5.53938	6.76666	3.73051	4.79423	4.10765	4.42989	1.99498	6.05086	6.20893	3.94782	3.31785	1.48001	2.5234	4.87855	2.77332	3.5072
chr1_69582720_69582932	0	5.03928	1.77596	4.13051	5.31517	3.64395	0.972427	5.44304	2.56036	0.92156	0.916652	3.72942	4.92348	1.95545	11.0568	4.93457	2.45655	1.76774	3.25146	2.03305	0	1.69166	3.73051	1.91769	2.05382	0	0.997489	0	5.32194	1.97391	4.14732	2.96002	3.36454	2.43928	0.92444	1.16907
chr1_72147015_72147215	6.79773	6.04714	3.55191	6.60881	3.54345	6.37691	3.88971	1.81435	2.56036	6.45092	3.66661	4.66177	3.69261	0.977727	2.55156	2.96074	0	4.41934	3.25146	4.0661	2.21575	4.22916	2.79788	0.958846	1.02691	3.32242	1.99498	4.32204	5.32194	13.8174	4.14732	2.96002	0.841135	2.43928	7.39552	4.67627
chr1_73003512_73003712	2.26591	4.03143	3.55191	6.60881	1.77172	1.82197	2.91728	3.62869	2.56036	2.76468	2.74995	13.053	3.69261	0.977727	4.2526	5.92149	1.22828	3.53548	1.08382	2.03305	2.21575	5.07499	3.73051	6.71192	3.08074	5.53736	0.997489	4.32204	3.54796	5.92174	4.97678	3.70002	2.5234	3.25237	0.92444	4.67627
chr1_74457632_74457841	5.66477	0	1.77596	2.47831	0.885862	0.910987	3.88971	3.62869	3.41382	9.2156	0.916652	6.52648	6.15435	6.84409	0	3.94766	1.22828	1.76774	2.16764	4.0661	1.10788	1.69166	4.66314	1.91769	1.02691	15.5046	1.99498	2.59323	6.20893	0	7.46517	1.48001	3.36454	0.813092	1.84888	7.0144
chr1_74938067_74938267	6.79773	2.01571	1.77596	1.6522	1.77172	1.82197	0.972427	3.62869	4.26727	5.52936	7.33321	1.86471	0	2.93318	2.55156	5.92149	3.68483	4.41934	1.08382	2.03305	4.43151	5.07499	5.59577	0.958846	2.05382	2.21494	11.9699	4.32204	3.54796	1.97391	2.48839	2.96002	5.04681	8.13092	3.69776	4.67627
chr1_77229110_77229310	14.7284	2.01571	2.66393	4.13051	5.31517	0.910987	4.86213	6.35022	7.68109	3.68624	5.49991	4.66177	2.46174	3.91091	8.5052	8.88223	2.45655	2.65161	2.16764	3.04957	2.21575	4.22916	5.59577	1.91769	1.02691	2.21494	5.98493	0.864408	1.77398	5.92174	2.48839	4.44003	5.04681	3.25237	3.69776	5.84534
chr1_77596857_77597057	2.26591	2.01571	1.77596	1.6522	3.54345	3.64395	5.83456	2.72152	3.41382	2.76468	3.66661	2.79706	2.46174	6.84409	0.85052	3.94766	3.68483	3.53548	2.16764	0	2.21575	0.845832	1.86526	0.958846	1.02691	3.32242	11.9699	6.91527	5.32194	2.96087	2.48839	2.96002	3.36454	4.06546	1.84888	1.16907
chr1_77716894_77717094	3.39886	5.03928	3.55191	7.43492	5.31517	6.37691	3.88971	3.62869	4.26727	5.52936	5.49991	7.45883	1.23087	9.77727	1.70104	5.92149	4.91311	4.41934	5.4191	4.0661	1.10788	5.07499	2.79788	5.75308	2.05382	4.42989	12.9674	6.91527	2.66097	0	6.6357	2.96002	2.5234	4.87855	2.77332	2.33813
chr1_78503115_78503315	3.39886	1.00786	3.55191	4.95661	3.54345	6.37691	12.6415	4.53587	1.70691	4.6078	5.49991	3.72942	3.69261	3.91091	1.70104	6.9084	1.22828	2.65161	5.4191	2.03305	2.21575	2.5375	2.79788	5.75308	1.02691	3.32242	5.98493	3.45763	4.43495	2.96087	5.80624	6.66004	3.36454	1.62618	4.6222	2.33813
chr1_82481311_82481559	2.26591	0	3.55191	4.13051	2.65759	2.73296	6.80699	4.53587	5.12073	6.45092	7.33321	1.86471	3.69261	6.84409	2.55156	1.97383	0	2.65161	3.25146	3.04957	2.21575	5.92083	1.86526	2.87654	4.10765	3.32242	12.9674	1.72882	2.66097	5.92174	2.48839	4.44003	5.04681	3.25237	0.92444	2.33813
chr1_83338079_83338344	15.8614	7.055	0	4.95661	6.20104	3.64395	6.80699	3.62869	2.56036	6.45092	5.49991	2.79706	0	3.91091	1.70104	1.97383	1.22828	3.53548	3.25146	4.0661	3.32363	3.38333	0	4.79423	4.10765	7.75231	7.97991	3.45763	5.32194	6.90869	1.65893	4.44003	5.88794	4.06546	2.77332	4.67627
chr1_84535517_84535766	4.53182	6.04714	3.55191	2.47831	3.54345	8.19888	3.88971	5.44304	1.70691	3.68624	3.66661	2.79706	3.69261	5.86636	2.55156	2.96074	2.45655	4.41934	4.33528	1.01652	2.21575	4.22916	6.5284	5.75308	7.18839	14.3971	4.98744	6.05086	6.20893	1.97391	7.46517	4.44003	6.72908	5.69165	4.6222	3.5072
chr1_86863712_86863912	0	1.00786	4.43989	2.47831	1.77172	6.37691	3.88971	5.44304	2.56036	3.68624	0.916652	1.86471	3.69261	2.93318	2.55156	2.96074	3.68483	5.30321	15.1735	3.04957	3.32363	6.76666	5.59577	5.75308	6.16147	4.42989	1.99498	4.32204	5.32194	4.93478	4.97678	3.70002	4.20567	5.69165	3.69776	4.67627
chr1_88114171_88114371	5.66477	6.04714	3.55191	4.95661	4.42931	4.55493	12.6415	4.53587	0	7.37248	2.74995	3.72942	4.92348	0.977727	2.55156	4.93457	6.14139	1.76774	1.08382	1.01652	2.21575	3.38333	4.66314	1.91769	2.05382	6.64483	5.98493	4.32204	2.66097	1.97391	0.829463	2.96002	1.68227	4.87855	6.47108	4.67627
chr1_88377827_88378027	2.26591	1.00786	3.55191	6.60881	2.65759	4.55493	0.972427	8.16456	6.82764	6.45092	0	3.72942	1.23087	4.88863	1.70104	1.97383	2.45655	6.18708	5.4191	0	2.21575	4.22916	1.86526	0.958846	12.3229	6.64483	3.98995	6.91527	2.66097	5.92174	0.829463	0	5.88794	7.31783	1.84888	3.5072
chr1_88400358_88400573	3.39886	5.03928	5.32787	8.26102	4.42931	0	1.94485	2.72152	1.70691	1.84312	5.49991	0.932354	2.46174	1.95545	1.70104	3.94766	0	5.30321	1.08382	2.03305	4.43151	4.22916	3.73051	3.83538	3.08074	0	2.99247	1.72882	1.77398	2.96087	4.14732	2.96002	2.5234	0.813092	4.6222	12.8597
chr1_88953603_88953862	4.53182	8.06285	1.77596	3.30441	6.20104	2.73296	6.80699	7.25739	3.41382	2.76468	5.49991	4.66177	4.92348	2.93318	6.80416	5.92149	2.45655	1.76774	4.33528	2.03305	3.32363	1.69166	3.73051	3.83538	16.4306	5.53736	6.98242	4.32204	5.32194	5.92174	3.31785	3.70002	2.5234	4.06546	4.6222	2.33813
chr1_89414460_89414799	20.3932	4.03143	5.32787	3.30441	6.20104	5.46592	3.88971	7.25739	7.68109	7.37248	7.33321	6.52648	2.46174	8.79954	4.2526	5.92149	2.45655	4.41934	7.58674	2.03305	0	5.92083	5.59577	6.71192	6.16147	3.32242	11.9699	0.864408	5.32194	5.92174	2.48839	5.18003	6.72908	4.06546	8.31996	5.84534
chr1_90315832_90316032	2.26591	6.04714	1.77596	3.30441	6.20104	9.10987	2.91728	3.62869	12.8018	5.52936	6.41656	6.52648	7.38523	2.93318	1.70104	4.93457	3.68483	5.30321	4.33528	8.1322	3.32363	1.69166	4.66314	4.79423	4.10765	7.75231	3.98995	1.72882	3.54796	5.92174	0	4.44003	0.841135	4.87855	6.47108	3.5072
chr1_92803083_92803283	1.13295	2.01571	3.55191	3.30441	2.65759	0.910987	1.94485	1.81435	3.41382	5.52936	3.66661	3.72942	3.69261	2.93318	3.40208	17.7645	2.45655	6.18708	8.67057	3.04957	2.21575	0.845832	1.86526	6.71192	1.02691	1.10747	3.98995	2.59323	3.54796	5.92174	4.97678	0.740005	3.36454	1.62618	0.92444	2.33813
chr1_92804724_92804924	3.39886	3.02357	2.66393	4.95661	3.54345	2.73296	1.94485	8.16456	2.56036	3.68624	4.58326	1.86471	1.23087	7.82182	3.40208	2.96074	3.68483	3.53548	1.08382	4.0661	12.1866	3.38333	5.59577	3.83538	3.08074	1.10747	2.99247	1.72882	3.54796	4.93478	1.65893	2.22001	2.5234	3.25237	0.92444	2.33813
chr1_92875907_92876157	6.79773	4.03143	6.21585	4.95661	6.20104	5.46592	13.614	6.35022	10.2415	2.76468	5.49991	3.72942	3.69261	4.88863	5.95364	1.97383	7.36966	2.65161	2.16764	8.1322	3.32363	3.38333	1.86526	5.75308	3.08074	4.42989	4.98744	2.59323	10.6439	3.94782	2.48839	2.96002	5.04681	2.43928	6.47108	4.67627
chr1_94776838_94777058	1.13295	2.01571	2.66393	2.47831	3.54345	2.73296	3.88971	1.81435	4.26727	2.76468	1.8333	2.79706	1.23087	4.88863	5.10312	4.93457	2.45655	1.76774	4.33528	5.08262	2.21575	3.38333	0.932628	3.83538	14.3768	3.32242	2.99247	2.59323	3.54796	5.92174	0.829463	0.740005	4.20567	1.62618	1.84888	3.5072
chr1_94975830_94976033	3.39886	1.00786	2.66393	1.6522	4.42931	4.55493	2.91728	1.81435	2.56036	2.76468	0.916652	4.66177	1.23087	0.977727	2.55156	3.94766	0	2.65161	0	2.03305	1.10788	4.22916	0.932628	0.958846	5.13456	1.10747	2.99247	2.59323	3.54796	3.94782	2.48839	1.48001	3.36454	1.62618	2.77332	11.6907
chr1_95874266_95874466	6.79773	6.04714	2.66393	1.6522	2.65759	0.910987	2.91728	5.44304	4.26727	4.6078	3.66661	4.66177	3.69261	3.91091	6.80416	2.96074	2.45655	3.53548	6.50292	4.0661	7.75514	2.5375	3.73051	3.83538	5.13456	12.1822	1.99498	2.59323	2.66097	4.93478	2.48839	2.96002	5.88794	3.25237	3.69776	5.84534
chr1_96254936_96255136	2.26591	5.03928	6.21585	3.30441	4.42931	4.55493	0.972427	1.81435	4.26727	2.76468	4.58326	12.1206	2.46174	2.93318	1.70104	5.92149	4.91311	2.65161	2.16764	6.09915	4.43151	3.38333	3.73051	2.87654	3.08074	3.32242	0.997489	4.32204	3.54796	0.986956	5.80624	2.96002	3.36454	5.69165	2.77332	8.18347
chr1_97772073_97772365	7.93068	5.03928	1.77596	2.47831	3.54345	4.55493	10.6967	5.44304	6.82764	7.37248	3.66661	3.72942	3.69261	5.86636	5.10312	5.92149	0	2.65161	6.50292	5.08262	4.43151	4.22916	6.5284	2.87654	2.05382	2.21494	2.99247	5.18645	4.43495	1.97391	3.31785	2.22001	4.20567	4.06546	8.31996	17.536
chr1_98045456_98045728	3.39886	3.02357	2.66393	4.95661	0.885862	3.64395	1.94485	6.35022	4.26727	7.37248	3.66661	2.79706	6.15435	6.84409	6.80416	5.92149	4.91311	5.30321	17.3411	3.04957	5.53938	4.22916	3.73051	1.91769	2.05382	4.42989	3.98995	5.18645	2.66097	1.97391	4.14732	5.18003	1.68227	0.813092	1.84888	3.5072
chr1_98894224_98894475	2.26591	4.03143	2.66393	3.30441	2.65759	1.82197	3.88971	5.44304	3.41382	4.6078	3.66661	3.72942	2.46174	0	5.95364	3.94766	3.68483	6.18708	4.33528	6.09915	15.5103	4.22916	4.66314	3.83538	3.08074	3.32242	4.98744	6.91527	5.32194	1.97391	5.80624	5.92004	2.5234	3.25237	5.54664	2.33813
chr1_99398016_99398227	6.79773	3.02357	5.32787	8.26102	1.77172	4.55493	2.91728	4.53587	3.41382	2.76468	3.66661	0.932354	3.69261	3.91091	1.70104	2.96074	4.91311	0.883869	2.16764	4.0661	2.21575	6.76666	2.79788	2.87654	4.10765	3.32242	11.9699	6.05086	4.43495	2.96087	2.48839	2.96002	3.36454	3.25237	0.92444	3.5072
chr1_99713616_99713861	3.39886	1.00786	1.77596	6.60881	4.42931	16.3978	1.94485	6.35022	3.41382	2.76468	1.8333	4.66177	3.69261	2.93318	7.65468	2.96074	2.45655	5.30321	2.16764	7.11567	4.43151	4.22916	2.79788	5.75308	1.02691	1.10747	2.99247	3.45763	7.09591	7.89565	2.48839	2.22001	3.36454	4.06546	5.54664	3.5072
chr1_105193840_105194114	3.39886	6.04714	1.77596	3.30441	7.0869	4.55493	13.614	3.62869	3.41382	0.92156	2.74995	2.79706	8.6161	2.93318	5.10312	2.96074	7.36966	3.53548	2.16764	6.09915	3.32363	4.22916	4.66314	7.67077	0	3.32242	3.98995	4.32204	3.54796	5.92174	4.97678	3.70002	4.20567	4.06546	0.92444	4.67627
chr1_105561524_105561724	3.39886	7.055	2.66393	2.47831	5.31517	4.55493	13.614	0.907174	1.70691	6.45092	1.8333	5.59413	1.23087	0.977727	3.40208	0.986915	6.14139	5.30321	5.4191	5.08262	3.32363	3.38333	3.73051	8.62962	2.05382	2.21494	4.98744	0.864408	1.77398	1.97391	4.97678	4.44003	0	2.43928	5.54664	3.5072
chr1_112295519_112295725	4.53182	4.03143	3.55191	4.95661	2.65759	2.73296	1.94485	4.53587	5.12073	4.6078	4.58326	0.932354	4.92348	0.977727	5.10312	0.986915	2.45655	0.883869	3.25146	5.08262	4.43151	2.5375	3.73051	3.83538	14.3768	1.10747	3.98995	5.18645	2.66097	2.96087	0.829463	2.96002	3.36454	2.43928	6.47108	0
chr1_113400149_113400349	2.26591	2.01571	5.32787	3.30441	8.85862	5.46592	0	2.72152	4.26727	5.52936	3.66661	6.52648	2.46174	2.93318	1.70104	0.986915	1.22828	1.76774	1.08382	4.0661	5.53938	1.69166	1.86526	3.83538	3.08074	5.53736	12.9674	2.59323	2.66097	4.93478	4.14732	2.22001	4.20567	8.13092	6.47108	0
chr1_118247046_118247246	4.53182	1.00786	0	3.30441	2.65759	2.73296	2.91728	1.81435	0	6.45092	1.8333	3.72942	2.46174	7.82182	1.70104	5.92149	7.36966	2.65161	3.25146	2.03305	1.10788	9.30416	2.79788	5.75308	13.3499	6.64483	7.97991	4.32204	2.66097	2.96087	1.65893	3.70002	0.841135	2.43928	1.84888	3.5072
chr1_118257201_118257401	4.53182	3.02357	4.43989	3.30441	2.65759	4.55493	3.88971	2.72152	3.41382	2.76468	2.74995	5.59413	3.69261	2.93318	6.80416	8.88223	1.22828	3.53548	1.08382	4.0661	8.86302	2.5375	5.59577	2.87654	2.05382	7.75231	1.99498	5.18645	3.54796	14.8043	2.48839	4.44003	3.36454	5.69165	4.6222	5.84534
chr1_118318295_118318495	5.66477	5.03928	7.10383	2.47831	8.85862	1.82197	2.91728	5.44304	3.41382	4.6078	3.66661	0.932354	0	0.977727	4.2526	1.97383	4.91311	5.30321	5.4191	8.1322	5.53938	2.5375	0.932628	4.79423	4.10765	3.32242	14.9623	2.59323	3.54796	2.96087	2.48839	3.70002	1.68227	3.25237	3.69776	3.5072
chr1_119998061_119998261	4.53182	1.00786	10.6557	3.30441	6.20104	6.37691	7.77942	9.07174	4.26727	5.52936	1.8333	0	6.15435	2.93318	4.2526	6.9084	0	2.65161	3.25146	3.04957	3.32363	4.22916	5.59577	0.958846	2.05382	3.32242	2.99247	2.59323	8.86989	5.92174	3.31785	5.18003	1.68227	2.43928	8.31996	15.1979
chr1_120077791_120077991	1.13295	2.01571	0.887978	4.13051	2.65759	4.55493	4.86213	5.44304	5.97418	1.84312	3.66661	2.79706	3.69261	5.86636	4.2526	6.9084	1.22828	3.53548	14.0897	5.08262	4.43151	0.845832	4.66314	2.87654	3.08074	1.10747	1.99498	2.59323	4.43495	2.96087	0.829463	1.48001	1.68227	2.43928	1.84888	3.5072
chr1_120421983_120422191	2.26591	2.01571	3.55191	4.13051	2.65759	1.82197	1.94485	5.44304	6.82764	2.76468	4.58326	1.86471	1.23087	0.977727	4.2526	2.96074	1.22828	2.65161	3.25146	3.04957	3.32363	3.38333	2.79788	0.958846	3.08074	4.42989	0.997489	2.59323	6.20893	3.94782	5.80624	5.18003	2.5234	1.62618	2.77332	15.1979
chr1_120499988_120500201	4.53182	8.06285	5.32787	0.826102	3.54345	1.82197	8.75184	0.907174	1.70691	5.52936	6.41656	0.932354	6.15435	1.95545	3.40208	2.96074	1.22828	5.30321	3.25146	6.09915	3.32363	3.38333	1.86526	4.79423	1.02691	2.21494	3.98995	5.18645	2.66097	13.8174	4.14732	3.70002	5.04681	4.06546	6.47108	4.67627
chr1_120584803_120585081	0	1.00786	0.887978	0	1.77172	1.82197	0.972427	1.81435	2.56036	0.92156	1.8333	0.932354	0	2.93318	0	0	1.22828	1.76774	1.08382	2.03305	2.21575	0.845832	0	0.958846	1.02691	1.10747	0	1.72882	1.77398	0.986956	2.48839	0	0	0	0	2.33813
chr1_121135026_121135268	4.53182	6.04714	7.10383	6.60881	6.20104	3.64395	5.83456	9.07174	9.388	3.68624	7.33321	4.66177	2.46174	2.93318	4.2526	6.9084	3.68483	7.07095	3.25146	8.1322	6.64726	6.76666	5.59577	5.75308	3.08074	6.64483	4.98744	6.05086	4.43495	6.90869	8.29463	2.96002	5.04681	9.75711	14.791	5.84534
chr1_121161462_121161674	2.26591	5.03928	5.32787	3.30441	4.42931	0.910987	15.5588	9.97891	1.70691	2.76468	6.41656	5.59413	7.38523	5.86636	5.95364	5.92149	3.68483	1.76774	5.4191	8.1322	5.53938	3.38333	2.79788	3.83538	3.08074	4.42989	5.98493	3.45763	1.77398	5.92174	2.48839	4.44003	8.41135	2.43928	3.69776	4.67627
chr1_142652985_142653185	5.66477	13.1021	5.32787	5.78271	5.31517	13.6648	7.77942	9.97891	5.97418	9.2156	5.49991	7.45883	4.92348	7.82182	5.95364	12.8299	12.2828	6.18708	6.50292	13.2148	8.86302	5.92083	8.39365	8.62962	7.18839	9.96725	5.98493	7.77968	11.5309	5.92174	9.95356	8.88006	5.88794	6.50474	7.39552	2.33813
chr1_142806547_142806902	26.058	39.3064	26.6393	30.5658	33.6628	28.2406	35.9798	26.308	31.5778	29.4899	34.8328	29.8353	34.4644	30.3095	29.7682	30.5944	29.4786	38.0064	40.1014	33.5453	31.0206	23.6833	30.7767	29.7242	25.6728	44.2989	28.9272	29.3899	31.9316	23.6869	29.8607	33.3002	32.8043	33.3368	41.5998	33.9029
chr1_142817383_142817583	6.79773	5.03928	3.55191	6.60881	6.20104	1.82197	4.86213	3.62869	2.56036	2.76468	5.49991	11.1883	6.15435	4.88863	1.70104	4.93457	14.7393	3.53548	2.16764	9.14872	6.64726	4.22916	3.73051	6.71192	6.16147	1.10747	1.99498	6.05086	6.20893	2.96087	5.80624	2.22001	6.72908	5.69165	2.77332	2.33813
chr1_142967377_142967596	6.79773	6.04714	7.10383	9.91322	8.85862	10.9318	7.77942	5.44304	3.41382	10.1372	4.58326	6.52648	12.3087	5.86636	11.0568	12.8299	4.91311	9.72256	7.58674	6.09915	6.64726	9.30416	5.59577	8.62962	8.2153	3.32242	5.98493	9.50849	7.9829	7.89565	4.97678	4.44003	9.25248	4.87855	6.47108	10.5216
chr1_143193889_143194105	2.26591	2.01571	1.77596	2.47831	4.42931	2.73296	2.91728	0.907174	1.70691	0	0.916652	2.79706	1.23087	0	0.85052	0	2.45655	2.65161	1.08382	2.03305	1.10788	1.69166	1.86526	0.958846	3.08074	3.32242	2.99247	0	0	0	2.48839	0	0.841135	1.62618	0.92444	1.16907
chr1_143243486_143243707	3.39886	4.03143	4.43989	6.60881	8.85862	5.46592	11.6691	3.62869	4.26727	5.52936	3.66661	2.79706	0	0.977727	4.2526	7.89532	4.91311	14.1419	3.25146	5.08262	7.75514	1.69166	5.59577	6.71192	4.10765	4.42989	5.98493	4.32204	3.54796	6.90869	6.6357	4.44003	6.72908	4.06546	3.69776	4.67627
chr1_143343159_143343400	0	3.02357	0.887978	1.6522	0	0	1.94485	1.81435	0	0.92156	1.8333	0	1.23087	0	0.85052	0.986915	3.68483	0	2.16764	1.01652	0	2.5375	0.932628	0.958846	1.02691	0	0	0.864408	0	0	2.48839	0.740005	1.68227	1.62618	0	0
chr1_143404330_143404530	10.1966	9.07071	8.87978	4.95661	5.31517	4.55493	7.77942	9.97891	11.9484	7.37248	8.24986	10.2559	3.69261	12.7104	9.35572	11.843	6.14139	7.95482	9.75439	6.09915	8.86302	11.8417	2.79788	2.87654	17.4575	14.3971	9.97489	0.864408	13.3048	14.8043	9.12409	8.14005	11.7759	8.94402	11.0933	12.8597
chr1_143484951_143485217	6.79773	5.03928	8.87978	4.13051	2.65759	3.64395	4.86213	7.25739	4.26727	3.68624	4.58326	7.45883	2.46174	5.86636	9.35572	4.93457	4.91311	3.53548	5.4191	5.08262	4.43151	3.38333	1.86526	1.91769	8.2153	4.42989	5.98493	2.59323	8.86989	3.94782	4.97678	6.66004	3.36454	3.25237	4.6222	2.33813
chr1_143516154_143516363	16.9943	14.11	9.76776	8.26102	13.2879	13.6648	9.72427	10.8861	7.68109	16.5881	10.9998	7.45883	16.0013	9.77727	9.35572	13.8168	13.511	9.72256	9.75439	13.2148	16.6182	8.45832	13.9894	17.2592	16.4306	13.2897	12.9674	22.4746	14.1918	8.88261	15.7598	13.3201	9.25248	14.6357	19.4132	15.1979
chr1_144542661_144542876	5.66477	0	0	0.826102	0.885862	2.73296	2.91728	0.907174	0.853455	3.68624	0.916652	3.72942	1.23087	0	3.40208	2.96074	3.68483	2.65161	3.25146	3.04957	1.10788	2.5375	0.932628	2.87654	2.05382	1.10747	0.997489	0.864408	3.54796	2.96087	1.65893	3.70002	1.68227	0.813092	0.92444	3.5072
chr1_145141661_145141861	4.53182	5.03928	2.66393	3.30441	3.54345	2.73296	5.83456	6.35022	4.26727	3.68624	3.66661	5.59413	8.6161	4.88863	5.10312	9.86915	2.45655	1.76774	3.25146	2.03305	4.43151	7.61249	7.46102	4.79423	10.2691	2.21494	3.98995	1.72882	5.32194	4.93478	3.31785	3.70002	5.04681	8.13092	5.54664	4.67627
chr1_145307201_145307405	10.1966	3.02357	2.66393	1.6522	2.65759	0	0.972427	3.62869	1.70691	5.52936	4.58326	4.66177	3.69261	2.93318	3.40208	4.93457	1.22828	1.76774	3.25146	2.03305	1.10788	1.69166	2.79788	1.91769	3.08074	4.42989	2.99247	3.45763	4.43495	0.986956	3.31785	7.40005	5.04681	0.813092	4.6222	0
chr1_145323524_145323794	11.3295	8.06285	15.0956	13.2176	17.7172	8.19888	8.75184	16.3291	7.68109	11.0587	12.8331	12.1206	6.15435	11.7327	13.6083	13.8168	7.36966	10.6064	13.0058	17.2809	8.86302	11.8417	10.2589	7.67077	3.08074	12.1822	13.9648	12.9661	13.3048	13.8174	17.4187	5.92004	10.9348	10.5702	7.39552	10.5216
chr1_146909017_146909363	12.4625	5.03928	7.10383	4.13051	0.885862	3.64395	20.421	7.25739	4.26727	7.37248	6.41656	6.52648	11.0778	5.86636	4.2526	2.96074	6.14139	2.65161	2.16764	4.0661	1.10788	4.22916	5.59577	6.71192	6.16147	8.85978	4.98744	6.91527	6.20893	1.97391	4.97678	3.70002	7.57021	8.13092	1.84888	7.0144
chr1_147597035_147597235	1.13295	2.01571	1.77596	1.6522	0	0	0.972427	1.81435	0.853455	0	0.916652	7.45883	0	2.93318	3.40208	1.97383	1.22828	0	1.08382	0	0	0	3.73051	0.958846	0	1.10747	5.98493	0	0.886989	0	0	0.740005	0	0	0.92444	0
chr1_147711126_147711328	1.13295	1.00786	0.887978	2.47831	3.54345	2.73296	2.91728	4.53587	2.56036	2.76468	4.58326	1.86471	2.46174	3.91091	1.70104	1.97383	4.91311	6.18708	6.50292	5.08262	1.10788	2.5375	5.59577	0.958846	2.05382	0	3.98995	5.18645	2.66097	5.92174	3.31785	5.18003	3.36454	3.25237	1.84888	1.16907
chr1_148180219_148180419	2.26591	5.03928	7.9918	4.95661	5.31517	1.82197	4.86213	3.62869	3.41382	3.68624	3.66661	7.45883	6.15435	5.86636	2.55156	2.96074	2.45655	2.65161	1.08382	5.08262	9.97089	5.92083	7.46102	2.87654	8.2153	4.42989	11.9699	6.05086	1.77398	4.93478	4.14732	1.48001	6.72908	5.69165	1.84888	8.18347
chr1_148220054_148220254	0	1.00786	3.55191	3.30441	1.77172	3.64395	0.972427	0	0.853455	2.76468	1.8333	1.86471	2.46174	1.95545	1.70104	0.986915	1.22828	0.883869	2.16764	2.03305	0	2.5375	1.86526	1.91769	1.02691	1.10747	1.99498	0.864408	5.32194	3.94782	2.48839	3.70002	1.68227	1.62618	4.6222	7.0144
chr1_148345132_148345332	2.26591	2.01571	0.887978	1.6522	2.65759	3.64395	0.972427	2.72152	0	1.84312	0.916652	3.72942	2.46174	3.91091	0.85052	0.986915	2.45655	1.76774	2.16764	3.04957	3.32363	1.69166	2.79788	0	2.05382	3.32242	0.997489	2.59323	0.886989	0	2.48839	2.96002	0.841135	2.43928	2.77332	5.84534
chr1_148598817_148599037	1.13295	2.01571	2.66393	4.13051	1.77172	2.73296	2.91728	4.53587	2.56036	2.76468	3.66661	0.932354	4.92348	0	2.55156	6.9084	2.45655	0.883869	1.08382	5.08262	6.64726	2.5375	3.73051	4.79423	3.08074	4.42989	1.99498	6.05086	1.77398	0.986956	4.97678	2.96002	1.68227	7.31783	0.92444	1.16907
chr1_148761641_148761841	1.13295	3.02357	0.887978	3.30441	0.885862	0	0.972427	0.907174	2.56036	1.84312	0.916652	0	2.46174	1.95545	0	0.986915	1.22828	0.883869	3.25146	0	0	1.69166	0	2.87654	1.02691	0	1.99498	0.864408	1.77398	0.986956	0	2.22001	0.841135	0	0	0
chr1_148922104_148922304	3.39886	4.03143	3.55191	5.78271	6.20104	5.46592	3.88971	8.16456	5.12073	6.45092	5.49991	4.66177	4.92348	5.86636	1.70104	7.89532	1.22828	6.18708	11.922	7.11567	3.32363	5.07499	5.59577	7.67077	10.2691	6.64483	1.99498	5.18645	7.9829	4.93478	4.97678	5.18003	6.72908	5.69165	5.54664	4.67627
chr1_149018447_149018665	5.66477	4.03143	1.77596	2.47831	4.42931	2.73296	4.86213	1.81435	0.853455	0	7.33321	2.79706	2.46174	4.88863	5.10312	2.96074	2.45655	0.883869	4.33528	2.03305	2.21575	4.22916	2.79788	8.62962	2.05382	4.42989	5.98493	2.59323	0.886989	1.97391	3.31785	2.96002	2.5234	4.87855	2.77332	2.33813
chr1_149302478_149302781	12.4625	10.0786	8.87978	7.43492	4.42931	10.0209	3.88971	8.16456	6.82764	3.68624	7.33321	5.59413	12.3087	10.755	5.95364	6.9084	12.2828	6.18708	11.922	11.1818	11.0788	9.30416	5.59577	8.62962	2.05382	11.0747	6.98242	6.05086	11.5309	13.8174	8.29463	8.88006	5.88794	8.94402	6.47108	5.84534
chr1_149691206_149691406	2.26591	5.03928	3.55191	4.95661	2.65759	2.73296	4.86213	2.72152	7.68109	1.84312	4.58326	1.86471	1.23087	2.93318	0.85052	3.94766	3.68483	1.76774	4.33528	3.04957	4.43151	7.61249	4.66314	3.83538	2.05382	3.32242	5.98493	5.18645	2.66097	3.94782	4.14732	3.70002	5.88794	2.43928	2.77332	4.67627
chr1_149816346_149816546	5.66477	3.02357	2.66393	3.30441	1.77172	6.37691	2.91728	0.907174	3.41382	3.68624	1.8333	5.59413	2.46174	0.977727	1.70104	2.96074	7.36966	3.53548	3.25146	6.09915	3.32363	10.15	4.66314	14.3827	2.05382	3.32242	5.98493	1.72882	3.54796	2.96087	2.48839	7.40005	6.72908	3.25237	0.92444	5.84534
chr1_149987533_149987733	2.26591	1.00786	7.10383	4.13051	3.54345	4.55493	2.91728	2.72152	5.12073	5.52936	1.8333	0.932354	6.15435	2.93318	11.9073	5.92149	6.14139	0.883869	2.16764	2.03305	1.10788	5.92083	4.66314	0.958846	3.08074	4.42989	1.99498	2.59323	2.66097	2.96087	4.97678	3.70002	2.5234	2.43928	2.77332	5.84534
chr1_151049990_151050190	3.39886	3.02357	0.887978	2.47831	5.31517	3.64395	3.88971	3.62869	3.41382	2.76468	5.49991	6.52648	2.46174	5.86636	5.10312	9.86915	3.68483	6.18708	14.0897	7.11567	8.86302	2.5375	2.79788	6.71192	4.10765	4.42989	3.98995	2.59323	1.77398	1.97391	2.48839	2.22001	2.5234	3.25237	2.77332	9.35254
chr1_152745751_152746018	4.53182	3.02357	0	0	1.77172	2.73296	1.94485	3.62869	5.12073	2.76468	4.58326	3.72942	0	1.95545	1.70104	1.97383	1.22828	1.76774	2.16764	2.03305	7.75514	5.07499	0.932628	0.958846	7.18839	2.21494	5.98493	3.45763	3.54796	1.97391	3.31785	4.44003	2.5234	5.69165	1.84888	1.16907
chr1_153748408_153748628	4.53182	6.04714	7.9918	6.60881	2.65759	2.73296	6.80699	6.35022	4.26727	7.37248	3.66661	4.66177	0	0.977727	0	0.986915	2.45655	2.65161	2.16764	6.09915	5.53938	5.92083	7.46102	3.83538	6.16147	5.53736	13.9648	6.05086	6.20893	3.94782	1.65893	1.48001	5.04681	4.87855	3.69776	2.33813
chr1_154061032_154061331	6.79773	3.02357	5.32787	5.78271	7.0869	17.3087	4.86213	2.72152	9.388	4.6078	5.49991	2.79706	3.69261	0.977727	5.95364	7.89532	6.14139	5.30321	2.16764	4.0661	6.64726	3.38333	2.79788	3.83538	4.10765	5.53736	0.997489	8.64408	7.09591	7.89565	3.31785	5.92004	4.20567	3.25237	8.31996	3.5072
chr1_154123658_154123896	5.66477	3.02357	5.32787	4.13051	5.31517	5.46592	5.83456	0.907174	3.41382	9.2156	4.58326	6.52648	3.69261	8.79954	5.95364	6.9084	3.68483	5.30321	5.4191	5.08262	7.75514	5.92083	3.73051	3.83538	3.08074	2.21494	4.98744	4.32204	2.66097	4.93478	5.80624	4.44003	5.88794	3.25237	4.6222	15.1979
chr1_154193212_154193412	9.06364	6.04714	6.21585	9.08712	4.42931	7.28789	2.91728	6.35022	8.53455	5.52936	10.0832	7.45883	3.69261	6.84409	5.95364	5.92149	3.68483	11.4903	4.33528	7.11567	3.32363	5.07499	4.66314	8.62962	13.3499	5.53736	3.98995	3.45763	4.43495	4.93478	3.31785	8.88006	5.88794	5.69165	4.6222	8.18347
chr1_154642227_154642427	6.79773	6.04714	3.55191	4.13051	1.77172	2.73296	1.94485	4.53587	7.68109	4.6078	2.74995	3.72942	3.69261	2.93318	2.55156	4.93457	0	5.30321	13.0058	6.09915	6.64726	5.92083	4.66314	4.79423	1.02691	4.42989	4.98744	3.45763	6.20893	2.96087	10.783	6.66004	9.25248	4.06546	2.77332	7.0144
chr1_154968456_154968683	3.39886	3.02357	9.76776	4.13051	4.42931	1.82197	3.88971	6.35022	3.41382	0.92156	3.66661	13.9853	8.6161	2.93318	4.2526	3.94766	6.14139	5.30321	8.67057	3.04957	4.43151	8.45832	4.66314	6.71192	4.10765	8.85978	7.97991	3.45763	2.66097	3.94782	5.80624	2.22001	4.20567	1.62618	4.6222	4.67627
chr1_155306221_155306422	2.26591	1.00786	5.32787	2.47831	1.77172	4.55493	2.91728	3.62869	2.56036	4.6078	5.49991	7.45883	1.23087	3.91091	3.40208	3.94766	6.14139	1.76774	3.25146	3.04957	4.43151	4.22916	2.79788	3.83538	14.3768	4.42989	2.99247	2.59323	3.54796	2.96087	4.97678	1.48001	5.04681	2.43928	4.6222	0
chr1_155548221_155548434	2.26591	3.02357	5.32787	0.826102	0.885862	2.73296	1.94485	1.81435	1.70691	4.6078	4.58326	3.72942	4.92348	2.93318	1.70104	0.986915	3.68483	0.883869	1.08382	5.08262	2.21575	4.22916	3.73051	0.958846	13.3499	4.42989	3.98995	0.864408	1.77398	4.93478	4.14732	2.22001	4.20567	4.87855	1.84888	0
chr1_155554789_155555051	3.39886	2.01571	3.55191	9.08712	4.42931	6.37691	0.972427	1.81435	1.70691	3.68624	2.74995	2.79706	1.23087	3.91091	3.40208	3.94766	8.59794	3.53548	3.25146	1.01652	5.53938	5.92083	3.73051	4.79423	2.05382	15.5046	4.98744	1.72882	3.54796	4.93478	7.46517	3.70002	1.68227	6.50474	1.84888	4.67627
chr1_155579918_155580118	4.53182	3.02357	6.21585	2.47831	0.885862	3.64395	5.83456	4.53587	4.26727	9.2156	4.58326	0.932354	3.69261	5.86636	3.40208	4.93457	6.14139	3.53548	8.67057	6.09915	3.32363	5.92083	4.66314	2.87654	4.10765	1.10747	1.99498	7.77968	0.886989	0.986956	6.6357	2.22001	4.20567	3.25237	0.92444	1.16907
chr1_156182227_156182427	5.66477	4.03143	3.55191	4.13051	6.20104	4.55493	5.83456	0.907174	3.41382	4.6078	4.58326	5.59413	1.23087	5.86636	3.40208	3.94766	1.22828	7.95482	1.08382	4.0661	4.43151	6.76666	0.932628	0	13.3499	5.53736	2.99247	5.18645	7.9829	3.94782	6.6357	5.18003	2.5234	3.25237	3.69776	4.67627
chr1_156265361_156265561	1.13295	4.03143	5.32787	4.95661	4.42931	2.73296	3.88971	9.07174	4.26727	6.45092	8.24986	8.39119	7.38523	4.88863	6.80416	6.9084	6.14139	6.18708	6.50292	2.03305	2.21575	1.69166	10.2589	3.83538	3.08074	1.10747	11.9699	9.50849	0	0.986956	4.14732	3.70002	2.5234	4.06546	0.92444	3.5072
chr1_158428966_158429166	4.53182	5.03928	3.55191	5.78271	1.77172	2.73296	1.94485	8.16456	1.70691	0.92156	5.49991	4.66177	3.69261	1.95545	5.10312	3.94766	3.68483	1.76774	6.50292	5.08262	14.4024	3.38333	1.86526	3.83538	4.10765	1.10747	4.98744	1.72882	3.54796	3.94782	3.31785	5.18003	5.04681	6.50474	5.54664	3.5072
chr1_159636460_159636685	3.39886	4.03143	7.10383	5.78271	6.20104	6.37691	4.86213	3.62869	3.41382	4.6078	5.49991	2.79706	1.23087	1.95545	5.10312	6.9084	0	7.07095	3.25146	4.0661	1.10788	5.92083	6.5284	3.83538	2.05382	1.10747	12.9674	6.91527	7.09591	4.93478	2.48839	3.70002	3.36454	4.87855	9.2444	1.16907
chr1_161237210_161237475	11.3295	4.03143	5.32787	3.30441	7.0869	5.46592	3.88971	8.16456	4.26727	5.52936	2.74995	6.52648	8.6161	0.977727	4.2526	6.9084	6.14139	4.41934	4.33528	3.04957	14.4024	5.07499	4.66314	0.958846	7.18839	8.85978	2.99247	6.05086	1.77398	1.97391	7.46517	6.66004	6.72908	3.25237	9.2444	2.33813
chr1_163233840_163234103	6.79773	8.06285	4.43989	3.30441	5.31517	5.46592	2.91728	3.62869	5.12073	1.84312	2.74995	9.32354	6.15435	3.91091	4.2526	0.986915	4.91311	6.18708	5.4191	9.14872	4.43151	5.92083	4.66314	6.71192	8.2153	3.32242	12.9674	1.72882	4.43495	2.96087	2.48839	2.96002	5.88794	4.87855	4.6222	2.33813
chr1_163279891_163280091	3.39886	3.02357	2.66393	1.6522	0.885862	2.73296	4.86213	3.62869	14.5087	2.76468	5.49991	5.59413	2.46174	4.88863	3.40208	7.89532	4.91311	0.883869	2.16764	3.04957	1.10788	2.5375	3.73051	4.79423	2.05382	2.21494	1.99498	2.59323	2.66097	2.96087	2.48839	7.40005	3.36454	3.25237	5.54664	2.33813
chr1_163698480_163698680	2.26591	5.03928	1.77596	5.78271	4.42931	4.55493	2.91728	3.62869	3.41382	2.76468	2.74995	13.9853	3.69261	0.977727	4.2526	5.92149	0	0.883869	1.08382	5.08262	3.32363	3.38333	2.79788	0.958846	5.13456	4.42989	1.99498	3.45763	2.66097	4.93478	4.97678	2.22001	4.20567	5.69165	3.69776	3.5072
chr1_166845510_166845710	3.39886	2.01571	6.21585	6.60881	0.885862	12.7538	4.86213	12.7004	8.53455	2.76468	3.66661	10.2559	1.23087	5.86636	6.80416	7.89532	7.36966	7.07095	5.4191	2.03305	6.64726	5.07499	5.59577	3.83538	2.05382	6.64483	3.98995	6.05086	6.20893	7.89565	4.97678	3.70002	4.20567	4.87855	2.77332	1.16907
chr1_167211194_167211417	2.26591	2.01571	3.55191	3.30441	5.31517	5.46592	4.86213	0.907174	3.41382	8.29404	5.49991	6.52648	6.15435	8.79954	4.2526	6.9084	7.36966	4.41934	8.67057	1.01652	7.75514	5.07499	3.73051	4.79423	8.2153	6.64483	13.9648	5.18645	7.09591	4.93478	2.48839	4.44003	2.5234	5.69165	5.54664	1.16907
chr1_167905226_167905467	4.53182	9.07071	7.10383	9.91322	4.42931	8.19888	5.83456	6.35022	11.0949	8.29404	5.49991	3.72942	2.46174	4.88863	11.0568	5.92149	6.14139	3.53548	4.33528	5.08262	15.5103	5.92083	8.39365	5.75308	8.2153	7.75231	8.9774	7.77968	7.09591	7.89565	7.46517	8.14005	5.04681	5.69165	4.6222	4.67627
chr1_168568659_168568863	2.26591	9.07071	1.77596	3.30441	3.54345	2.73296	1.94485	4.53587	3.41382	5.52936	6.41656	0.932354	3.69261	0.977727	0	4.93457	3.68483	0.883869	3.25146	4.0661	3.32363	5.07499	5.59577	1.91769	2.05382	2.21494	4.98744	4.32204	5.32194	15.7913	3.31785	5.18003	4.20567	3.25237	3.69776	2.33813
chr1_169467938_169468138	1.13295	5.03928	0.887978	1.6522	7.0869	2.73296	0.972427	2.72152	11.9484	1.84312	2.74995	8.39119	3.69261	3.91091	0	1.97383	3.68483	1.76774	10.8382	5.08262	3.32363	4.22916	3.73051	2.87654	3.08074	2.21494	1.99498	2.59323	0.886989	1.97391	4.14732	5.18003	1.68227	7.31783	3.69776	4.67627
chr1_171564418_171564654	3.39886	4.03143	4.43989	0.826102	4.42931	4.55493	13.614	2.72152	6.82764	5.52936	5.49991	7.45883	7.38523	3.91091	7.65468	3.94766	3.68483	4.41934	3.25146	3.04957	8.86302	6.76666	3.73051	8.62962	5.13456	5.53736	3.98995	5.18645	5.32194	3.94782	6.6357	5.92004	6.72908	3.25237	2.77332	2.33813
chr1_173870890_173871095	1.13295	3.02357	2.66393	4.13051	4.42931	2.73296	1.94485	3.62869	5.12073	4.6078	5.49991	2.79706	4.92348	2.93318	1.70104	0	2.45655	2.65161	3.25146	3.04957	4.43151	4.22916	1.86526	0.958846	6.16147	3.32242	3.98995	4.32204	2.66097	3.94782	2.48839	2.22001	3.36454	4.06546	4.6222	15.1979
chr1_175047036_175047291	2.26591	1.00786	15.0956	3.30441	1.77172	2.73296	3.88971	2.72152	1.70691	3.68624	3.66661	1.86471	3.69261	2.93318	3.40208	1.97383	3.68483	2.65161	7.58674	4.0661	6.64726	5.92083	3.73051	2.87654	2.05382	2.21494	3.98995	4.32204	3.54796	0.986956	3.31785	3.70002	2.5234	4.87855	4.6222	2.33813
chr1_176085436_176085636	0	3.02357	1.77596	4.13051	7.0869	0	1.94485	4.53587	1.70691	2.76468	1.8333	4.66177	6.15435	0.977727	2.55156	2.96074	1.22828	3.53548	6.50292	4.0661	3.32363	0	1.86526	1.91769	4.10765	3.32242	5.98493	3.45763	3.54796	2.96087	4.14732	6.66004	4.20567	1.62618	4.6222	12.8597
chr1_176513901_176514107	4.53182	7.055	7.9918	5.78271	2.65759	3.64395	5.83456	3.62869	3.41382	4.6078	0.916652	2.79706	3.69261	3.91091	2.55156	0.986915	4.91311	1.76774	2.16764	4.0661	2.21575	2.5375	3.73051	2.87654	13.3499	2.21494	1.99498	2.59323	2.66097	3.94782	4.14732	2.96002	5.04681	3.25237	1.84888	2.33813
chr1_177877829_177878029	1.13295	0	3.55191	2.47831	3.54345	12.7538	3.88971	5.44304	6.82764	0	6.41656	2.79706	3.69261	2.93318	2.55156	3.94766	0	2.65161	3.25146	5.08262	6.64726	1.69166	4.66314	0.958846	6.16147	1.10747	2.99247	4.32204	2.66097	3.94782	6.6357	3.70002	2.5234	1.62618	2.77332	3.5072
chr1_178216785_178217015	3.39886	5.03928	7.10383	4.95661	5.31517	1.82197	2.91728	4.53587	6.82764	8.29404	1.8333	1.86471	1.23087	7.82182	11.0568	0.986915	4.91311	7.07095	8.67057	5.08262	3.32363	8.45832	4.66314	5.75308	3.08074	5.53736	6.98242	3.45763	4.43495	4.93478	8.29463	3.70002	8.41135	4.06546	7.39552	2.33813
chr1_180637695_180637911	12.4625	2.01571	5.32787	0	2.65759	1.82197	4.86213	2.72152	4.26727	2.76468	5.49991	3.72942	4.92348	5.86636	5.10312	2.96074	2.45655	6.18708	3.25146	3.04957	4.43151	1.69166	3.73051	1.91769	3.08074	7.75231	4.98744	6.91527	0.886989	3.94782	5.80624	5.18003	4.20567	3.25237	5.54664	5.84534
chr1_181804447_181804744	2.26591	5.03928	3.55191	1.6522	3.54345	6.37691	2.91728	4.53587	7.68109	7.37248	4.58326	2.79706	3.69261	4.88863	2.55156	1.97383	7.36966	4.41934	16.2573	4.0661	2.21575	1.69166	6.5284	3.83538	7.18839	6.64483	3.98995	2.59323	5.32194	5.92174	4.14732	3.70002	2.5234	3.25237	1.84888	8.18347
chr1_181956343_181956543	3.39886	3.02357	0.887978	3.30441	3.54345	2.73296	1.94485	1.81435	1.70691	1.84312	4.58326	2.79706	0	3.91091	8.5052	7.89532	6.14139	4.41934	4.33528	3.04957	5.53938	4.22916	0.932628	1.91769	2.05382	3.32242	12.9674	2.59323	3.54796	4.93478	0.829463	2.96002	4.20567	2.43928	6.47108	3.5072
chr1_182573467_182573667	4.53182	9.07071	7.10383	4.13051	5.31517	8.19888	8.75184	9.07174	5.12073	4.6078	3.66661	6.52648	7.38523	3.91091	6.80416	4.93457	7.36966	7.07095	2.16764	6.09915	4.43151	10.15	5.59577	3.83538	14.3768	4.42989	7.97991	7.77968	2.66097	6.90869	5.80624	5.18003	5.88794	4.87855	10.1688	8.18347
chr1_182686888_182687088	4.53182	2.01571	4.43989	4.13051	5.31517	4.55493	1.94485	6.35022	3.41382	4.6078	1.8333	3.72942	1.23087	6.84409	1.70104	2.96074	1.22828	5.30321	2.16764	2.03305	0	4.22916	6.5284	0.958846	3.08074	0	11.9699	1.72882	5.32194	5.92174	0.829463	0.740005	0	3.25237	3.69776	4.67627
chr1_183135026_183135226	14.7284	4.03143	2.66393	3.30441	6.20104	5.46592	1.94485	0	4.26727	1.84312	7.33321	4.66177	1.23087	6.84409	2.55156	3.94766	7.36966	5.30321	3.25146	7.11567	2.21575	5.07499	2.79788	1.91769	0	4.42989	3.98995	1.72882	2.66097	1.97391	0.829463	1.48001	5.04681	2.43928	1.84888	5.84534
chr1_183673245_183673466	2.26591	3.02357	3.55191	4.95661	4.42931	4.55493	2.91728	6.35022	5.12073	6.45092	1.8333	8.39119	4.92348	2.93318	0	2.96074	1.22828	0.883869	5.4191	3.04957	5.53938	4.22916	4.66314	5.75308	3.08074	4.42989	3.98995	5.18645	1.77398	4.93478	3.31785	3.70002	3.36454	4.06546	0.92444	15.1979
chr1_185793483_185793683	5.66477	5.03928	5.32787	1.6522	4.42931	4.55493	12.6415	2.72152	4.26727	1.84312	4.58326	5.59413	2.46174	1.95545	0.85052	1.97383	6.14139	4.41934	3.25146	5.08262	7.75514	3.38333	2.79788	3.83538	3.08074	5.53736	0	4.32204	3.54796	1.97391	3.31785	3.70002	4.20567	4.06546	1.84888	5.84534
chr1_185981010_185981210	4.53182	1.00786	3.55191	1.6522	4.42931	1.82197	3.88971	1.81435	5.97418	5.52936	6.41656	3.72942	4.92348	4.88863	5.10312	3.94766	3.68483	1.76774	15.1735	5.08262	3.32363	2.5375	2.79788	1.91769	3.08074	1.10747	1.99498	6.05086	3.54796	6.90869	3.31785	0	3.36454	4.06546	8.31996	3.5072
chr1_187268051_187268259	4.53182	3.02357	5.32787	1.6522	5.31517	2.73296	7.77942	6.35022	4.26727	1.84312	0.916652	2.79706	6.15435	3.91091	12.7578	7.89532	2.45655	6.18708	4.33528	3.04957	2.21575	1.69166	5.59577	4.79423	3.08074	4.42989	6.98242	6.05086	2.66097	10.8565	3.31785	4.44003	1.68227	4.87855	0.92444	1.16907
chr1_188841209_188841409	3.39886	4.03143	6.21585	3.30441	4.42931	2.73296	3.88971	3.62869	5.97418	8.29404	4.58326	3.72942	2.46174	3.91091	0.85052	4.93457	2.45655	3.53548	2.16764	3.04957	2.21575	3.38333	0.932628	0	1.02691	5.53736	1.99498	4.32204	1.77398	12.8304	4.97678	2.22001	3.36454	4.87855	4.6222	4.67627
chr1_191520968_191521168	1.13295	3.02357	1.77596	2.47831	3.54345	2.73296	12.6415	4.53587	1.70691	0.92156	0	8.39119	2.46174	5.86636	3.40208	1.97383	6.14139	7.07095	2.16764	5.08262	7.75514	3.38333	1.86526	1.91769	4.10765	1.10747	0	3.45763	2.66097	5.92174	4.97678	2.22001	1.68227	4.06546	1.84888	5.84534
chr1_192490472_192490672	0	5.03928	4.43989	3.30441	3.54345	3.64395	4.86213	1.81435	2.56036	2.76468	2.74995	3.72942	3.69261	3.91091	3.40208	0.986915	3.68483	4.41934	4.33528	2.03305	4.43151	2.5375	4.66314	3.83538	2.05382	4.42989	11.9699	6.91527	5.32194	3.94782	3.31785	2.22001	3.36454	2.43928	3.69776	4.67627
chr1_202180636_202180851	5.66477	2.01571	6.21585	3.30441	4.42931	0.910987	0.972427	3.62869	2.56036	2.76468	3.66661	4.66177	1.23087	0.977727	2.55156	4.93457	2.45655	4.41934	3.25146	4.0661	3.32363	6.76666	3.73051	2.87654	15.4037	3.32242	4.98744	3.45763	0.886989	2.96087	3.31785	2.22001	1.68227	5.69165	3.69776	3.5072
chr1_203184124_203184345	3.39886	0	3.55191	8.26102	0.885862	5.46592	6.80699	2.72152	5.97418	5.52936	2.74995	0.932354	4.92348	5.86636	3.40208	1.97383	4.91311	2.65161	5.4191	5.08262	4.43151	3.38333	8.39365	5.75308	13.3499	3.32242	4.98744	6.91527	7.09591	0	4.14732	2.96002	3.36454	2.43928	6.47108	10.5216
chr1_203628003_203628203	3.39886	4.03143	2.66393	3.30441	2.65759	5.46592	6.80699	5.44304	11.9484	0.92156	3.66661	3.72942	2.46174	2.93318	10.2062	3.94766	6.14139	6.18708	1.08382	1.01652	2.21575	5.92083	3.73051	3.83538	3.08074	3.32242	1.99498	3.45763	4.43495	8.88261	2.48839	5.18003	0.841135	3.25237	2.77332	3.5072
chr1_204465542_204465742	1.13295	2.01571	0.887978	4.95661	7.97276	2.73296	11.6691	3.62869	2.56036	1.84312	4.58326	1.86471	2.46174	3.91091	1.70104	2.96074	2.45655	3.53548	1.08382	4.0661	3.32363	3.38333	3.73051	2.87654	5.13456	2.21494	1.99498	4.32204	6.20893	0.986956	0	3.70002	3.36454	5.69165	1.84888	4.67627
chr1_206783102_206783302	2.26591	1.00786	2.66393	3.30441	1.77172	6.37691	1.94485	4.53587	3.41382	5.52936	5.49991	4.66177	1.23087	4.88863	1.70104	3.94766	1.22828	3.53548	2.16764	3.04957	3.32363	4.22916	3.73051	3.83538	2.05382	13.2897	1.99498	1.72882	1.77398	1.97391	2.48839	2.22001	5.88794	4.87855	7.39552	3.5072
chr1_207140896_207141096	3.39886	3.02357	5.32787	9.91322	2.65759	4.55493	4.86213	5.44304	5.12073	1.84312	3.66661	4.66177	2.46174	5.86636	11.9073	1.97383	4.91311	3.53548	7.58674	2.03305	2.21575	5.07499	6.5284	3.83538	4.10765	4.42989	5.98493	4.32204	2.66097	4.93478	7.46517	4.44003	3.36454	5.69165	4.6222	1.16907
chr1_207444520_207444722	3.39886	5.03928	1.77596	4.13051	7.0869	1.82197	1.94485	0.907174	5.12073	10.1372	4.58326	12.1206	2.46174	0.977727	0.85052	2.96074	3.68483	4.41934	4.33528	2.03305	1.10788	2.5375	3.73051	1.91769	5.13456	1.10747	2.99247	5.18645	3.54796	1.97391	1.65893	1.48001	5.04681	0.813092	5.54664	3.5072
chr1_208048505_208048705	1.13295	2.01571	1.77596	5.78271	2.65759	2.73296	0.972427	1.81435	2.56036	8.29404	6.41656	1.86471	8.6161	1.95545	4.2526	0.986915	3.68483	2.65161	2.16764	8.1322	4.43151	3.38333	6.5284	1.91769	1.02691	6.64483	7.97991	2.59323	2.66097	3.94782	5.80624	2.22001	4.20567	4.87855	0.92444	15.1979
chr1_209840456_209840656	3.39886	5.03928	0.887978	4.95661	2.65759	0.910987	12.6415	6.35022	5.97418	5.52936	0.916652	0.932354	3.69261	1.95545	2.55156	0	1.22828	1.76774	3.25146	2.03305	5.53938	4.22916	1.86526	1.91769	2.05382	3.32242	1.99498	4.32204	3.54796	1.97391	2.48839	3.70002	2.5234	3.25237	8.31996	1.16907
chr1_209958011_209958221	5.66477	4.03143	10.6557	8.26102	7.0869	6.37691	12.6415	3.62869	2.56036	2.76468	7.33321	5.59413	4.92348	14.6659	8.5052	7.89532	6.14139	3.53548	4.33528	5.08262	2.21575	7.61249	3.73051	2.87654	3.08074	11.0747	5.98493	7.77968	3.54796	5.92174	6.6357	6.66004	5.04681	6.50474	6.47108	9.35254
chr1_210042694_210042894	2.26591	1.00786	4.43989	4.95661	3.54345	12.7538	5.83456	2.72152	3.41382	0.92156	1.8333	3.72942	4.92348	3.91091	4.2526	0.986915	8.59794	3.53548	0	5.08262	7.75514	3.38333	2.79788	5.75308	2.05382	5.53736	1.99498	0	6.20893	3.94782	2.48839	3.70002	5.04681	0.813092	4.6222	3.5072
chr1_210058044_210058244	5.66477	6.04714	3.55191	3.30441	2.65759	1.82197	6.80699	3.62869	2.56036	1.84312	5.49991	6.52648	14.7705	3.91091	4.2526	2.96074	2.45655	2.65161	4.33528	4.0661	2.21575	3.38333	0.932628	5.75308	9.24221	5.53736	4.98744	0	5.32194	3.94782	5.80624	7.40005	4.20567	4.87855	5.54664	1.16907
chr1_212102534_212102734	1.13295	3.02357	12.4317	6.60881	5.31517	1.82197	4.86213	5.44304	3.41382	4.6078	6.41656	1.86471	4.92348	3.91091	2.55156	0.986915	4.91311	7.95482	3.25146	5.08262	2.21575	2.5375	6.5284	3.83538	3.08074	1.10747	3.98995	6.91527	6.20893	1.97391	8.29463	5.92004	2.5234	0.813092	5.54664	4.67627
chr1_214009352_214009552	3.39886	2.01571	0.887978	5.78271	1.77172	4.55493	8.75184	0.907174	8.53455	1.84312	0	1.86471	2.46174	2.93318	11.9073	2.96074	2.45655	3.53548	5.4191	2.03305	1.10788	6.76666	1.86526	4.79423	7.18839	4.42989	1.99498	3.45763	5.32194	5.92174	3.31785	2.96002	3.36454	3.25237	3.69776	3.5072
chr1_215969552_215969752	4.53182	7.055	0	2.47831	2.65759	4.55493	2.91728	0.907174	1.70691	3.68624	4.58326	3.72942	1.23087	2.93318	1.70104	1.97383	3.68483	2.65161	1.08382	0	5.53938	4.22916	1.86526	2.87654	4.10765	3.32242	13.9648	4.32204	1.77398	2.96087	3.31785	1.48001	1.68227	5.69165	5.54664	7.0144
chr1_217706709_217706909	4.53182	4.03143	1.77596	0.826102	2.65759	0.910987	0.972427	0.907174	3.41382	2.76468	0.916652	3.72942	0	0	1.70104	2.96074	1.22828	4.41934	11.922	4.0661	5.53938	3.38333	6.5284	1.91769	5.13456	2.21494	5.98493	7.77968	4.43495	3.94782	3.31785	4.44003	4.20567	4.87855	0.92444	4.67627
chr1_218518915_218519163	3.39886	3.02357	4.43989	1.6522	5.31517	4.55493	13.614	6.35022	2.56036	6.45092	0.916652	6.52648	2.46174	3.91091	5.95364	2.96074	4.91311	0.883869	0	5.08262	4.43151	4.22916	5.59577	4.79423	1.02691	4.42989	5.98493	6.05086	7.09591	4.93478	4.14732	4.44003	4.20567	1.62618	1.84888	4.67627
chr1_218561582_218561834	5.66477	6.04714	3.55191	4.95661	7.97276	0.910987	1.94485	1.81435	3.41382	1.84312	5.49991	1.86471	4.92348	0.977727	2.55156	2.96074	1.22828	0	4.33528	4.0661	2.21575	2.5375	2.79788	0.958846	3.08074	15.5046	3.98995	2.59323	2.66097	7.89565	5.80624	3.70002	6.72908	2.43928	7.39552	3.5072
chr1_220743770_220744019	3.39886	4.03143	3.55191	2.47831	2.65759	2.73296	3.88971	2.72152	11.9484	5.52936	3.66661	0.932354	8.6161	2.93318	6.80416	4.93457	0	7.07095	3.25146	1.01652	2.21575	3.38333	4.66314	7.67077	0	3.32242	0.997489	9.50849	7.9829	2.96087	1.65893	5.18003	3.36454	5.69165	3.69776	5.84534
chr1_222053308_222053557	5.66477	3.02357	6.21585	4.95661	5.31517	1.82197	6.80699	2.72152	7.68109	0.92156	5.49991	3.72942	7.38523	8.79954	2.55156	3.94766	1.22828	3.53548	6.50292	4.0661	14.4024	3.38333	2.79788	2.87654	8.2153	5.53736	2.99247	7.77968	7.09591	1.97391	4.14732	2.96002	6.72908	3.25237	7.39552	2.33813
chr1_223928583_223928783	9.06364	2.01571	3.55191	4.13051	5.31517	2.73296	1.94485	4.53587	2.56036	5.52936	3.66661	2.79706	4.92348	4.88863	0.85052	2.96074	3.68483	2.65161	2.16764	3.04957	3.32363	3.38333	1.86526	7.67077	3.08074	4.42989	4.98744	3.45763	3.54796	2.96087	7.46517	6.66004	4.20567	3.25237	5.54664	15.1979
chr1_224311143_224311381	6.79773	4.03143	1.77596	3.30441	5.31517	1.82197	2.91728	2.72152	3.41382	0.92156	6.41656	0	1.23087	6.84409	5.95364	4.93457	2.45655	1.76774	1.08382	2.03305	2.21575	5.07499	4.66314	2.87654	13.3499	6.64483	5.98493	5.18645	5.32194	3.94782	4.14732	6.66004	5.88794	3.25237	2.77332	1.16907
chr1_226368080_226368280	5.66477	6.04714	1.77596	3.30441	3.54345	7.28789	3.88971	4.53587	3.41382	3.68624	3.66661	4.66177	6.15435	8.79954	2.55156	1.97383	3.68483	2.65161	3.25146	3.04957	1.10788	3.38333	2.79788	0.958846	5.13456	1.10747	10.9724	1.72882	0.886989	9.86956	4.97678	2.22001	5.88794	9.75711	3.69776	2.33813
chr1_228001140_228001340	1.13295	3.02357	1.77596	1.6522	1.77172	2.73296	1.94485	4.53587	5.97418	3.68624	4.58326	1.86471	4.92348	1.95545	6.80416	2.96074	1.22828	0.883869	1.08382	6.09915	2.21575	5.92083	5.59577	2.87654	4.10765	3.32242	11.9699	1.72882	3.54796	2.96087	4.14732	5.92004	2.5234	2.43928	1.84888	2.33813
chr1_228402531_228402739	4.53182	4.03143	1.77596	2.47831	3.54345	3.64395	2.91728	1.81435	5.12073	8.29404	0.916652	2.79706	0	2.93318	2.55156	4.93457	8.59794	4.41934	3.25146	3.04957	4.43151	4.22916	2.79788	1.91769	4.10765	15.5046	1.99498	4.32204	4.43495	4.93478	4.14732	0.740005	3.36454	8.13092	4.6222	1.16907
chr1_228782059_228782364	1.13295	1.00786	2.66393	0	0.885862	0.910987	1.94485	2.72152	0	0.92156	0.916652	0	0	0	0.85052	0	2.45655	0.883869	1.08382	1.01652	0	0.845832	0	1.91769	0	0	1.99498	1.72882	0.886989	0	0.829463	0	0.841135	2.43928	1.84888	0
chr1_228973690_228973890	3.39886	3.02357	1.77596	2.47831	5.31517	3.64395	3.88971	6.35022	4.26727	5.52936	0	6.52648	6.15435	4.88863	4.2526	0.986915	4.91311	4.41934	3.25146	1.01652	4.43151	5.07499	2.79788	0.958846	4.10765	4.42989	4.98744	6.91527	4.43495	14.8043	2.48839	2.22001	3.36454	3.25237	1.84888	2.33813
chr1_235449953_235450184	5.66477	7.055	4.43989	3.30441	2.65759	5.46592	2.91728	3.62869	2.56036	4.6078	4.58326	2.79706	1.23087	0.977727	1.70104	5.92149	1.22828	7.07095	15.1735	4.0661	4.43151	1.69166	6.5284	3.83538	6.16147	3.32242	2.99247	6.05086	6.20893	5.92174	5.80624	2.96002	2.5234	6.50474	5.54664	2.33813
chr1_236951796_236951996	4.53182	2.01571	4.43989	8.26102	3.54345	12.7538	3.88971	6.35022	2.56036	4.6078	2.74995	0.932354	6.15435	1.95545	5.95364	4.93457	2.45655	2.65161	4.33528	2.03305	3.32363	2.5375	5.59577	5.75308	4.10765	4.42989	2.99247	1.72882	3.54796	0.986956	2.48839	3.70002	7.57021	7.31783	2.77332	5.84534
chr1_238351002_238351202	5.66477	2.01571	4.43989	4.13051	3.54345	1.82197	3.88971	4.53587	2.56036	5.52936	5.49991	5.59413	1.23087	1.95545	6.80416	1.97383	4.91311	4.41934	6.50292	1.01652	3.32363	6.76666	2.79788	3.83538	2.05382	2.21494	12.9674	5.18645	3.54796	0.986956	3.31785	2.96002	4.20567	2.43928	0.92444	7.0144
chr1_239258566_239258766	1.13295	2.01571	3.55191	1.6522	4.42931	6.37691	3.88971	4.53587	1.70691	4.6078	2.74995	0.932354	4.92348	7.82182	5.10312	2.96074	2.45655	1.76774	3.25146	3.04957	1.10788	3.38333	2.79788	1.91769	3.08074	4.42989	2.99247	1.72882	5.32194	4.93478	2.48839	4.44003	3.36454	5.69165	2.77332	15.1979
chr1_240334489_240334689	2.26591	5.03928	2.66393	2.47831	4.42931	0.910987	10.6967	1.81435	9.388	5.52936	2.74995	1.86471	2.46174	6.84409	2.55156	1.97383	4.91311	4.41934	0	3.04957	1.10788	2.5375	4.66314	0.958846	3.08074	3.32242	1.99498	2.59323	4.43495	4.93478	3.31785	3.70002	0.841135	6.50474	3.69776	7.0144
chr1_240851438_240851638	1.13295	6.04714	4.43989	0	2.65759	3.64395	4.86213	3.62869	0.853455	1.84312	2.74995	3.72942	4.92348	3.91091	2.55156	2.96074	2.45655	3.53548	2.16764	1.01652	3.32363	4.22916	4.66314	6.71192	2.05382	4.42989	10.9724	2.59323	1.77398	0.986956	1.65893	3.70002	2.5234	2.43928	0.92444	3.5072
chr1_241011539_241011739	1.13295	3.02357	0	6.60881	3.54345	3.64395	12.6415	2.72152	3.41382	2.76468	5.49991	2.79706	2.46174	2.93318	1.70104	1.97383	2.45655	5.30321	6.50292	6.09915	5.53938	2.5375	6.5284	1.91769	2.05382	3.32242	2.99247	2.59323	0.886989	0.986956	2.48839	2.22001	5.04681	3.25237	5.54664	4.67627
chr1_241124354_241124554	3.39886	6.04714	4.43989	4.13051	3.54345	1.82197	1.94485	3.62869	2.56036	1.84312	8.24986	5.59413	4.92348	4.88863	5.10312	4.93457	6.14139	4.41934	3.25146	2.03305	4.43151	4.22916	5.59577	0.958846	13.3499	3.32242	5.98493	3.45763	4.43495	2.96087	0.829463	6.66004	5.04681	4.87855	4.6222	1.16907
chr1_243451099_243451404	3.39886	6.04714	12.4317	5.78271	4.42931	4.55493	3.88971	7.25739	8.53455	7.37248	10.9998	5.59413	7.38523	8.79954	5.10312	4.93457	7.36966	11.4903	1.08382	9.14872	16.6182	3.38333	4.66314	4.79423	7.18839	3.32242	7.97991	5.18645	2.66097	6.90869	7.46517	5.92004	2.5234	7.31783	3.69776	4.67627
chr1_245108703_245108958	1.13295	4.03143	9.76776	4.13051	2.65759	4.55493	13.614	2.72152	3.41382	3.68624	6.41656	6.52648	3.69261	11.7327	5.10312	7.89532	4.91311	5.30321	6.50292	2.03305	6.64726	6.76666	4.66314	2.87654	3.08074	4.42989	0.997489	6.91527	4.43495	2.96087	3.31785	5.18003	5.04681	3.25237	1.84888	5.84534
chr1_246017557_246017757	2.26591	2.01571	5.32787	1.6522	3.54345	2.73296	2.91728	3.62869	13.6553	0	0.916652	0.932354	1.23087	3.91091	10.2062	2.96074	1.22828	2.65161	5.4191	4.0661	1.10788	2.5375	7.46102	6.71192	5.13456	2.21494	4.98744	2.59323	0.886989	2.96087	4.14732	1.48001	4.20567	2.43928	3.69776	4.67627
chr1_246525917_246526117	0	2.01571	1.77596	4.13051	1.77172	0.910987	3.88971	2.72152	1.70691	0.92156	3.66661	3.72942	3.69261	0	2.55156	3.94766	0	5.30321	0	0	2.21575	0.845832	2.79788	4.79423	2.05382	0	7.97991	1.72882	2.66097	0.986956	0	2.96002	4.20567	2.43928	0.92444	2.33813
chr1_246526741_246526972	10.1966	3.02357	1.77596	7.43492	4.42931	2.73296	2.91728	3.62869	4.26727	3.68624	3.66661	1.86471	4.92348	4.88863	4.2526	4.93457	1.22828	2.65161	2.16764	3.04957	4.43151	4.22916	2.79788	2.87654	5.13456	2.21494	3.98995	2.59323	5.32194	0.986956	1.65893	4.44003	4.20567	4.06546	5.54664	10.5216
chr1_246728656_246728898	4.53182	5.03928	7.10383	4.95661	4.42931	4.55493	2.91728	6.35022	3.41382	2.76468	8.24986	8.39119	2.46174	4.88863	2.55156	4.93457	3.68483	5.30321	3.25146	6.09915	6.64726	3.38333	7.46102	10.5473	5.13456	3.32242	4.98744	6.05086	4.43495	3.94782	3.31785	5.18003	5.88794	4.06546	2.77332	16.3669
chr1_246766711_246767060	7.93068	1.00786	10.6557	5.78271	7.0869	9.10987	5.83456	4.53587	4.26727	6.45092	7.33321	4.66177	3.69261	9.77727	7.65468	2.96074	6.14139	4.41934	3.25146	8.1322	0	5.07499	6.5284	3.83538	8.2153	7.75231	17.9548	3.45763	7.9829	5.92174	10.783	7.40005	7.57021	0.813092	5.54664	4.67627
chr1_247073386_247073586	6.79773	4.03143	2.66393	3.30441	4.42931	11.8428	6.80699	6.35022	3.41382	5.52936	5.49991	4.66177	1.23087	3.91091	6.80416	5.92149	4.91311	3.53548	2.16764	2.03305	0	1.69166	3.73051	3.83538	4.10765	4.42989	8.9774	6.05086	5.32194	2.96087	3.31785	4.44003	7.57021	4.87855	4.6222	3.5072
chr1_247291138_247291363	13.5955	1.00786	3.55191	2.47831	5.31517	5.46592	1.94485	5.44304	4.26727	4.6078	4.58326	4.66177	14.7705	5.86636	4.2526	6.9084	2.45655	4.41934	5.4191	2.03305	4.43151	4.22916	3.73051	1.91769	9.24221	6.64483	3.98995	3.45763	2.66097	5.92174	4.14732	2.96002	5.04681	4.06546	4.6222	5.84534
chr10_79981_80181	2.26591	1.00786	0.887978	2.47831	0.885862	0	0	0	0.853455	0	0	0	0	0.977727	0	0	1.22828	0.883869	1.08382	0	1.10788	0.845832	0	0.958846	0	0	0	0	0.886989	0	0	2.22001	0	2.43928	3.69776	0
chr10_685049_685266	1.13295	3.02357	0.887978	4.95661	7.0869	4.55493	5.83456	2.72152	11.0949	3.68624	3.66661	3.72942	2.46174	2.93318	0.85052	2.96074	3.68483	4.41934	1.08382	4.0661	3.32363	1.69166	2.79788	3.83538	4.10765	4.42989	3.98995	5.18645	1.77398	5.92174	4.14732	1.48001	2.5234	6.50474	2.77332	2.33813
chr10_2661966_2662166	3.39886	5.03928	0.887978	4.13051	4.42931	1.82197	6.80699	2.72152	13.6553	1.84312	3.66661	2.79706	4.92348	3.91091	4.2526	2.96074	1.22828	1.76774	4.33528	3.04957	0	1.69166	6.5284	4.79423	3.08074	7.75231	3.98995	3.45763	0.886989	4.93478	3.31785	1.48001	4.20567	7.31783	1.84888	4.67627
chr10_3371850_3372050	4.53182	5.03928	0.887978	0.826102	4.42931	5.46592	2.91728	4.53587	2.56036	6.45092	4.58326	2.79706	1.23087	1.95545	4.2526	3.94766	4.91311	1.76774	4.33528	3.04957	17.726	6.76666	2.79788	7.67077	7.18839	2.21494	3.98995	5.18645	0.886989	3.94782	0.829463	6.66004	5.04681	2.43928	6.47108	7.0144
chr10_4383232_4383432	13.5955	2.01571	3.55191	0.826102	2.65759	2.73296	4.86213	0	2.56036	1.84312	0.916652	3.72942	2.46174	4.88863	5.95364	3.94766	4.91311	2.65161	3.25146	2.03305	2.21575	1.69166	1.86526	7.67077	5.13456	2.21494	4.98744	3.45763	2.66097	3.94782	4.97678	4.44003	0	2.43928	1.84888	3.5072
chr10_5642187_5642387	3.39886	3.02357	0.887978	0.826102	2.65759	1.82197	5.83456	2.72152	2.56036	1.84312	4.58326	4.66177	14.7705	3.91091	5.10312	2.96074	8.59794	1.76774	1.08382	2.03305	2.21575	3.38333	1.86526	3.83538	1.02691	1.10747	0	0.864408	3.54796	1.97391	4.14732	1.48001	0	4.06546	5.54664	4.67627
chr10_5713193_5713420	2.26591	4.03143	5.32787	4.13051	3.54345	3.64395	2.91728	1.81435	5.12073	3.68624	0.916652	7.45883	3.69261	2.93318	5.95364	1.97383	0	2.65161	4.33528	2.03305	2.21575	2.5375	2.79788	3.83538	4.10765	5.53736	3.98995	3.45763	7.09591	16.7783	3.31785	5.18003	4.20567	4.87855	2.77332	5.84534
chr10_5847610_5847810	3.39886	2.01571	4.43989	3.30441	3.54345	2.73296	6.80699	2.72152	2.56036	5.52936	5.49991	2.79706	1.23087	8.79954	7.65468	4.93457	1.22828	0.883869	14.0897	4.0661	1.10788	5.07499	4.66314	2.87654	5.13456	4.42989	3.98995	2.59323	6.20893	1.97391	4.97678	2.22001	2.5234	5.69165	5.54664	4.67627
chr10_6781747_6781957	2.26591	4.03143	1.77596	3.30441	6.20104	4.55493	3.88971	5.44304	3.41382	6.45092	2.74995	0.932354	4.92348	1.95545	2.55156	5.92149	2.45655	6.18708	3.25146	2.03305	6.64726	5.92083	5.59577	6.71192	4.10765	1.10747	1.99498	3.45763	4.43495	3.94782	4.97678	2.22001	6.72908	7.31783	3.69776	15.1979
chr10_7219509_7219720	3.39886	2.01571	5.32787	1.6522	1.77172	2.73296	6.80699	0	2.56036	1.84312	6.41656	12.1206	1.23087	0.977727	1.70104	5.92149	4.91311	5.30321	4.33528	3.04957	1.10788	0.845832	3.73051	0.958846	1.02691	0	3.98995	2.59323	2.66097	1.97391	2.48839	2.96002	3.36454	0.813092	3.69776	5.84534
chr10_7321801_7322077	7.93068	8.06285	3.55191	9.08712	3.54345	15.4868	6.80699	2.72152	5.12073	3.68624	0	3.72942	8.6161	3.91091	1.70104	4.93457	3.68483	1.76774	4.33528	5.08262	0	1.69166	6.5284	7.67077	4.10765	6.64483	6.98242	3.45763	7.09591	3.94782	5.80624	5.92004	3.36454	5.69165	0.92444	2.33813
chr10_8073044_8073274	2.26591	3.02357	2.66393	7.43492	5.31517	2.73296	4.86213	1.81435	2.56036	5.52936	4.58326	5.59413	4.92348	2.93318	4.2526	5.92149	4.91311	5.30321	3.25146	3.04957	1.10788	6.76666	4.66314	4.79423	12.3229	1.10747	4.98744	1.72882	2.66097	1.97391	5.80624	5.18003	4.20567	4.87855	4.6222	3.5072
chr10_8288895_8289095	5.66477	4.03143	7.10383	2.47831	3.54345	3.64395	2.91728	0.907174	6.82764	1.84312	2.74995	2.79706	1.23087	2.93318	2.55156	4.93457	1.22828	4.41934	2.16764	4.0661	3.32363	6.76666	1.86526	2.87654	12.3229	0	0.997489	4.32204	5.32194	5.92174	4.97678	4.44003	3.36454	3.25237	1.84888	3.5072
chr10_9215899_9216150	7.93068	5.03928	7.10383	3.30441	2.65759	14.5758	4.86213	2.72152	2.56036	1.84312	2.74995	5.59413	1.23087	0.977727	2.55156	3.94766	3.68483	3.53548	3.25146	4.0661	3.32363	2.5375	2.79788	3.83538	3.08074	3.32242	2.99247	5.18645	3.54796	1.97391	4.14732	5.92004	1.68227	2.43928	4.6222	7.0144
chr10_10322510_10322760	4.53182	0	3.55191	4.95661	3.54345	2.73296	0.972427	0	3.41382	2.76468	2.74995	1.86471	2.46174	1.95545	4.2526	0	3.68483	3.53548	0	5.08262	3.32363	4.22916	7.46102	3.83538	2.05382	14.3971	0.997489	2.59323	0.886989	2.96087	2.48839	6.66004	1.68227	2.43928	3.69776	7.0144
chr10_10528920_10529120	1.13295	4.03143	7.10383	0.826102	4.42931	4.55493	6.80699	1.81435	7.68109	4.6078	2.74995	3.72942	3.69261	3.91091	3.40208	2.96074	3.68483	7.95482	1.08382	3.04957	2.21575	2.5375	0.932628	3.83538	4.10765	13.2897	2.99247	6.05086	6.20893	3.94782	2.48839	3.70002	8.41135	5.69165	2.77332	7.0144
chr10_12110728_12110931	6.79773	7.055	11.5437	4.95661	1.77172	3.64395	6.80699	8.16456	7.68109	8.29404	6.41656	6.52648	11.0778	5.86636	4.2526	3.94766	7.36966	8.83869	4.33528	11.1818	2.21575	2.5375	7.46102	9.58846	5.13456	4.42989	12.9674	6.05086	6.20893	4.93478	9.12409	5.18003	11.7759	4.87855	3.69776	4.67627
chr10_13057016_13057216	0	3.02357	1.77596	3.30441	3.54345	2.73296	1.94485	5.44304	7.68109	4.6078	8.24986	7.45883	14.7705	0.977727	5.10312	0.986915	3.68483	5.30321	4.33528	7.11567	6.64726	0.845832	2.79788	2.87654	5.13456	6.64483	1.99498	6.05086	3.54796	8.88261	1.65893	3.70002	4.20567	4.06546	7.39552	2.33813
chr10_13693408_13693608	1.13295	5.03928	0.887978	3.30441	1.77172	6.37691	1.94485	3.62869	5.12073	5.52936	2.74995	2.79706	3.69261	3.91091	2.55156	3.94766	0	6.18708	14.0897	2.03305	3.32363	3.38333	3.73051	7.67077	4.10765	2.21494	4.98744	4.32204	5.32194	4.93478	1.65893	1.48001	5.88794	3.25237	1.84888	1.16907
chr10_13748787_13748987	13.5955	4.03143	2.66393	1.6522	2.65759	0.910987	3.88971	5.44304	3.41382	5.52936	7.33321	3.72942	3.69261	0.977727	6.80416	3.94766	0	2.65161	8.67057	7.11567	3.32363	3.38333	2.79788	1.91769	4.10765	1.10747	0	0.864408	2.66097	4.93478	1.65893	2.22001	2.5234	2.43928	3.69776	1.16907
chr10_14037021_14037221	4.53182	1.00786	2.66393	1.6522	5.31517	5.46592	4.86213	2.72152	1.70691	6.45092	5.49991	1.86471	1.23087	6.84409	4.2526	2.96074	3.68483	7.07095	14.0897	5.08262	2.21575	2.5375	3.73051	2.87654	5.13456	5.53736	3.98995	5.18645	2.66097	4.93478	4.14732	7.40005	2.5234	2.43928	3.69776	5.84534
chr10_14178349_14178549	2.26591	2.01571	4.43989	6.60881	3.54345	2.73296	0	1.81435	2.56036	5.52936	4.58326	3.72942	2.46174	1.95545	1.70104	2.96074	2.45655	1.76774	5.4191	7.11567	2.21575	5.92083	5.59577	0	2.05382	7.75231	13.9648	2.59323	0.886989	2.96087	0.829463	4.44003	0.841135	4.06546	0	2.33813
chr10_14650586_14650794	4.53182	4.03143	6.21585	4.13051	7.97276	2.73296	14.5864	4.53587	4.26727	4.6078	4.58326	1.86471	2.46174	2.93318	7.65468	4.93457	3.68483	4.41934	2.16764	10.1652	3.32363	7.61249	6.5284	4.79423	1.02691	3.32242	1.99498	4.32204	5.32194	2.96087	0.829463	4.44003	5.04681	4.06546	3.69776	5.84534
chr10_14974290_14974490	2.26591	5.03928	3.55191	7.43492	1.77172	1.82197	1.94485	4.53587	3.41382	2.76468	1.8333	1.86471	3.69261	0.977727	5.95364	2.96074	3.68483	3.53548	2.16764	5.08262	4.43151	5.92083	7.46102	2.87654	1.02691	15.5046	3.98995	4.32204	2.66097	4.93478	4.14732	3.70002	8.41135	7.31783	7.39552	1.16907
chr10_17532114_17532380	1.13295	6.04714	5.32787	3.30441	4.42931	3.64395	2.91728	0.907174	4.26727	2.76468	6.41656	4.66177	7.38523	4.88863	2.55156	1.97383	4.91311	1.76774	4.33528	2.03305	17.726	3.38333	5.59577	5.75308	2.05382	7.75231	0.997489	6.05086	0.886989	3.94782	5.80624	3.70002	0.841135	3.25237	9.2444	2.33813
chr10_17683764_17683964	7.93068	4.03143	4.43989	4.95661	2.65759	3.64395	4.86213	1.81435	5.97418	4.6078	2.74995	5.59413	1.23087	3.91091	5.10312	2.96074	3.68483	4.41934	5.4191	5.08262	14.4024	4.22916	3.73051	2.87654	3.08074	3.32242	3.98995	6.05086	0.886989	8.88261	4.14732	2.96002	3.36454	3.25237	4.6222	0
chr10_18326991_18327191	6.79773	0	2.66393	3.30441	1.77172	4.55493	2.91728	2.72152	1.70691	6.45092	4.58326	1.86471	6.15435	2.93318	1.70104	5.92149	3.68483	0.883869	2.16764	5.08262	5.53938	4.22916	3.73051	4.79423	3.08074	4.42989	1.99498	3.45763	2.66097	3.94782	2.48839	2.22001	1.68227	2.43928	2.77332	15.1979
chr10_18344123_18344323	3.39886	1.00786	4.43989	3.30441	2.65759	2.73296	1.94485	0	0.853455	4.6078	6.41656	3.72942	2.46174	3.91091	3.40208	9.86915	4.91311	0.883869	4.33528	5.08262	3.32363	1.69166	2.79788	4.79423	3.08074	6.64483	1.99498	3.45763	2.66097	0.986956	14.9303	1.48001	3.36454	0.813092	1.84888	7.0144
chr10_18631381_18631631	3.39886	6.04714	7.10383	2.47831	7.0869	3.64395	4.86213	4.53587	5.12073	0.92156	2.74995	6.52648	3.69261	1.95545	1.70104	6.9084	6.14139	7.07095	3.25146	1.01652	3.32363	2.5375	4.66314	2.87654	6.16147	16.6121	0.997489	4.32204	4.43495	4.93478	3.31785	2.96002	4.20567	3.25237	3.69776	9.35254
chr10_19202762_19202970	0	2.01571	0	4.13051	3.54345	5.46592	13.614	1.81435	5.12073	1.84312	3.66661	1.86471	3.69261	2.93318	0	2.96074	2.45655	2.65161	3.25146	3.04957	3.32363	1.69166	3.73051	0	5.13456	1.10747	1.99498	3.45763	0.886989	1.97391	2.48839	5.92004	5.04681	3.25237	2.77332	4.67627
chr10_19694423_19694825	7.93068	7.055	4.43989	4.95661	3.54345	6.37691	3.88971	4.53587	7.68109	9.2156	7.33321	7.45883	3.69261	4.88863	5.10312	4.93457	11.0545	8.83869	0	8.1322	5.53938	4.22916	5.59577	4.79423	4.10765	5.53736	17.9548	5.18645	3.54796	4.93478	1.65893	3.70002	10.0936	4.06546	1.84888	1.16907
chr10_20052329_20052529	1.13295	3.02357	0.887978	5.78271	0.885862	5.46592	1.94485	4.53587	3.41382	3.68624	2.74995	2.79706	3.69261	1.95545	5.95364	2.96074	4.91311	1.76774	4.33528	0	2.21575	1.69166	2.79788	3.83538	5.13456	5.53736	0.997489	6.05086	2.66097	13.8174	1.65893	2.22001	2.5234	4.87855	5.54664	2.33813
chr10_21805616_21805877	7.93068	3.02357	6.21585	4.95661	6.20104	10.0209	8.75184	6.35022	14.5087	4.6078	7.33321	2.79706	3.69261	1.95545	2.55156	3.94766	4.91311	2.65161	1.08382	8.1322	2.21575	4.22916	3.73051	5.75308	5.13456	4.42989	5.98493	6.91527	6.20893	4.93478	2.48839	4.44003	5.04681	6.50474	2.77332	7.0144
chr10_22431337_22431537	3.39886	5.03928	1.77596	1.6522	3.54345	3.64395	10.6967	2.72152	0	2.76468	3.66661	6.52648	1.23087	0.977727	0.85052	1.97383	2.45655	2.65161	3.25146	3.04957	4.43151	1.69166	3.73051	2.87654	4.10765	5.53736	5.98493	2.59323	0.886989	2.96087	2.48839	4.44003	4.20567	4.06546	3.69776	2.33813
chr10_23023542_23023789	3.39886	3.02357	5.32787	2.47831	2.65759	15.4868	6.80699	0.907174	4.26727	2.76468	3.66661	3.72942	2.46174	4.88863	3.40208	0.986915	3.68483	3.53548	2.16764	4.0661	0	5.92083	1.86526	0.958846	2.05382	6.64483	4.98744	3.45763	3.54796	1.97391	3.31785	4.44003	2.5234	1.62618	6.47108	4.67627
chr10_23384588_23384788	2.26591	3.02357	3.55191	4.95661	4.42931	2.73296	7.77942	4.53587	5.12073	3.68624	5.49991	3.72942	3.69261	3.91091	8.5052	3.94766	1.22828	7.07095	11.922	4.0661	3.32363	3.38333	6.5284	5.75308	2.05382	2.21494	5.98493	4.32204	2.66097	5.92174	4.97678	2.22001	6.72908	4.87855	2.77332	2.33813
chr10_23624642_23624865	2.26591	3.02357	2.66393	0.826102	4.42931	3.64395	1.94485	1.81435	0.853455	0.92156	7.33321	5.59413	1.23087	3.91091	3.40208	3.94766	2.45655	7.07095	1.08382	3.04957	7.75514	5.92083	5.59577	2.87654	14.3768	0	2.99247	4.32204	0	7.89565	2.48839	1.48001	2.5234	5.69165	2.77332	3.5072
chr10_23667409_23667672	9.06364	5.03928	7.10383	4.95661	4.42931	2.73296	13.614	4.53587	1.70691	4.6078	2.74995	5.59413	1.23087	9.77727	1.70104	2.96074	4.91311	4.41934	1.08382	4.0661	4.43151	7.61249	5.59577	2.87654	6.16147	2.21494	4.98744	1.72882	5.32194	1.97391	4.14732	2.96002	6.72908	4.87855	5.54664	1.16907
chr10_26395719_26395919	3.39886	2.01571	5.32787	5.78271	1.77172	6.37691	0.972427	4.53587	4.26727	1.84312	6.41656	9.32354	1.23087	5.86636	5.95364	3.94766	1.22828	5.30321	4.33528	5.08262	0	6.76666	6.5284	2.87654	1.02691	2.21494	0	4.32204	0.886989	1.97391	4.14732	4.44003	3.36454	1.62618	2.77332	12.8597
chr10_27097568_27097768	5.66477	1.00786	0.887978	7.43492	1.77172	6.37691	2.91728	4.53587	1.70691	5.52936	1.8333	3.72942	3.69261	0.977727	1.70104	4.93457	3.68483	3.53548	1.08382	5.08262	13.2945	1.69166	6.5284	3.83538	7.18839	1.10747	2.99247	1.72882	3.54796	1.97391	1.65893	3.70002	2.5234	5.69165	1.84888	0
chr10_27911727_27911927	4.53182	0	2.66393	4.95661	1.77172	3.64395	4.86213	3.62869	3.41382	3.68624	5.49991	3.72942	1.23087	7.82182	1.70104	3.94766	0	2.65161	10.8382	3.04957	4.43151	4.22916	5.59577	9.58846	2.05382	4.42989	1.99498	6.05086	2.66097	3.94782	5.80624	4.44003	4.20567	7.31783	0.92444	5.84534
chr10_28490243_28490443	6.79773	2.01571	0.887978	0	1.77172	5.46592	0	2.72152	4.26727	2.76468	3.66661	3.72942	4.92348	0.977727	4.2526	1.97383	2.45655	6.18708	4.33528	4.0661	13.2945	2.5375	2.79788	6.71192	2.05382	4.42989	2.99247	4.32204	2.66097	2.96087	1.65893	2.22001	0.841135	4.06546	1.84888	5.84534
chr10_28821247_28821520	10.1966	2.01571	6.21585	15.6959	10.6303	8.19888	10.6967	5.44304	5.97418	4.6078	7.33321	18.6471	6.15435	5.86636	5.10312	4.93457	8.59794	3.53548	5.4191	5.08262	6.64726	10.15	6.5284	7.67077	1.02691	3.32242	3.98995	5.18645	4.43495	8.88261	3.31785	4.44003	7.57021	6.50474	13.8666	7.0144
chr10_28872577_28872816	6.79773	3.02357	5.32787	4.95661	3.54345	4.55493	1.94485	3.62869	4.26727	3.68624	4.58326	0	0	5.86636	0.85052	1.97383	2.45655	1.76774	2.16764	3.04957	16.6182	0.845832	3.73051	4.79423	2.05382	1.10747	1.99498	0.864408	4.43495	3.94782	5.80624	8.14005	2.5234	2.43928	6.47108	0
chr10_28888976_28889194	3.39886	8.06285	3.55191	4.95661	2.65759	2.73296	4.86213	2.72152	13.6553	0.92156	4.58326	6.52648	2.46174	4.88863	4.2526	0.986915	3.68483	5.30321	2.16764	3.04957	4.43151	1.69166	4.66314	2.87654	4.10765	6.64483	0	3.45763	2.66097	1.97391	3.31785	2.96002	7.57021	1.62618	4.6222	3.5072
chr10_30004628_30004862	3.39886	3.02357	5.32787	4.13051	4.42931	4.55493	1.94485	5.44304	6.82764	4.6078	2.74995	6.52648	4.92348	4.88863	2.55156	3.94766	3.68483	2.65161	2.16764	4.0661	16.6182	4.22916	1.86526	4.79423	9.24221	4.42989	3.98995	3.45763	4.43495	1.97391	2.48839	2.22001	5.04681	2.43928	2.77332	5.84534
chr10_30326160_30326399	3.39886	5.03928	3.55191	2.47831	9.74449	4.55493	3.88971	6.35022	3.41382	2.76468	4.58326	1.86471	0	5.86636	2.55156	4.93457	4.91311	6.18708	5.4191	3.04957	3.32363	4.22916	5.59577	2.87654	13.3499	4.42989	4.98744	7.77968	6.20893	4.93478	3.31785	5.18003	1.68227	5.69165	7.39552	4.67627
chr10_31735243_31735443	1.13295	3.02357	2.66393	0.826102	1.77172	0.910987	2.91728	1.81435	0	0	2.74995	0.932354	3.69261	1.95545	2.55156	1.97383	1.22828	2.65161	1.08382	2.03305	1.10788	2.5375	0.932628	2.87654	5.13456	2.21494	2.99247	2.59323	1.77398	0.986956	2.48839	2.96002	0	4.06546	1.84888	1.16907
chr10_31919860_31920091	2.26591	3.02357	1.77596	3.30441	2.65759	2.73296	4.86213	5.44304	6.82764	0.92156	6.41656	16.7824	2.46174	3.91091	3.40208	3.94766	4.91311	4.41934	1.08382	12.1983	4.43151	4.22916	7.46102	2.87654	7.18839	4.42989	5.98493	4.32204	2.66097	2.96087	4.97678	3.70002	4.20567	2.43928	0	2.33813
chr10_32268504_32268704	2.26591	7.055	2.66393	2.47831	3.54345	6.37691	3.88971	4.53587	5.12073	2.76468	3.66661	0	4.92348	5.86636	3.40208	2.96074	1.22828	3.53548	14.0897	2.03305	8.86302	5.07499	1.86526	2.87654	2.05382	3.32242	1.99498	1.72882	6.20893	2.96087	9.12409	1.48001	2.5234	3.25237	2.77332	4.67627
chr10_32317698_32317926	5.66477	3.02357	6.21585	1.6522	2.65759	1.82197	3.88971	2.72152	6.82764	7.37248	5.49991	3.72942	2.46174	2.93318	2.55156	5.92149	4.91311	3.53548	5.4191	9.14872	2.21575	4.22916	3.73051	3.83538	5.13456	16.6121	4.98744	1.72882	3.54796	3.94782	4.97678	8.14005	2.5234	3.25237	2.77332	1.16907
chr10_33002021_33002251	5.66477	7.055	7.9918	5.78271	2.65759	0.910987	3.88971	2.72152	5.97418	4.6078	4.58326	2.79706	3.69261	2.93318	1.70104	3.94766	2.45655	0.883869	5.4191	5.08262	4.43151	3.38333	3.73051	5.75308	3.08074	6.64483	13.9648	0.864408	1.77398	1.97391	9.12409	1.48001	7.57021	2.43928	3.69776	9.35254
chr10_33981291_33981497	15.8614	2.01571	0.887978	4.95661	6.20104	6.37691	2.91728	6.35022	1.70691	2.76468	3.66661	3.72942	4.92348	1.95545	5.10312	3.94766	3.68483	1.76774	2.16764	3.04957	7.75514	3.38333	3.73051	2.87654	2.05382	6.64483	4.98744	2.59323	5.32194	3.94782	3.31785	2.96002	4.20567	4.06546	7.39552	5.84534
chr10_34082540_34082753	1.13295	2.01571	5.32787	4.95661	5.31517	2.73296	1.94485	2.72152	4.26727	3.68624	5.49991	3.72942	3.69261	1.95545	5.10312	2.96074	3.68483	5.30321	3.25146	2.03305	5.53938	2.5375	3.73051	3.83538	2.05382	7.75231	5.98493	3.45763	1.77398	6.90869	6.6357	6.66004	5.04681	4.06546	4.6222	16.3669
chr10_35547468_35547668	6.79773	1.00786	1.77596	5.78271	1.77172	1.82197	0.972427	0.907174	1.70691	1.84312	0.916652	5.59413	2.46174	6.84409	6.80416	3.94766	2.45655	3.53548	0	2.03305	6.64726	3.38333	3.73051	6.71192	10.2691	4.42989	2.99247	5.18645	4.43495	4.93478	4.14732	1.48001	5.04681	2.43928	2.77332	4.67627
chr10_38392412_38392612	5.66477	3.02357	1.77596	5.78271	7.97276	2.73296	8.75184	2.72152	2.56036	4.6078	3.66661	3.72942	1.23087	2.93318	0.85052	0.986915	3.68483	4.41934	5.4191	6.09915	4.43151	5.92083	5.59577	0.958846	13.3499	7.75231	3.98995	2.59323	5.32194	2.96087	3.31785	3.70002	2.5234	5.69165	5.54664	5.84534
chr10_38549054_38549297	13.5955	2.01571	1.77596	4.13051	0.885862	3.64395	2.91728	0.907174	3.41382	1.84312	5.49991	1.86471	6.15435	3.91091	2.55156	3.94766	1.22828	6.18708	4.33528	7.11567	2.21575	5.92083	2.79788	3.83538	4.10765	3.32242	5.98493	4.32204	4.43495	3.94782	4.14732	4.44003	2.5234	2.43928	3.69776	1.16907
chr10_38975882_38976111	5.66477	5.03928	9.76776	8.26102	8.85862	5.46592	3.88971	5.44304	6.82764	10.1372	9.16652	2.79706	6.15435	5.86636	6.80416	2.96074	9.82622	8.83869	8.67057	7.11567	9.97089	8.45832	6.5284	2.87654	8.2153	6.64483	9.97489	12.9661	8.86989	13.8174	9.95356	5.92004	11.7759	6.50474	7.39552	21.0432
chr10_39034962_39035176	5.66477	3.02357	3.55191	1.6522	3.54345	14.5758	4.86213	4.53587	4.26727	8.29404	3.66661	4.66177	3.69261	4.88863	3.40208	5.92149	0	3.53548	3.25146	5.08262	2.21575	3.38333	1.86526	2.87654	4.10765	1.10747	4.98744	3.45763	3.54796	3.94782	6.6357	2.96002	5.04681	3.25237	4.6222	5.84534
chr10_42609419_42609619	9.06364	17.1336	6.21585	7.43492	7.97276	9.10987	5.83456	6.35022	5.12073	10.1372	7.33321	5.59413	7.38523	12.7104	7.65468	12.8299	12.2828	12.3742	7.58674	10.1652	4.43151	10.15	4.66314	16.3004	7.18839	5.53736	11.9699	8.64408	5.32194	9.86956	6.6357	7.40005	9.25248	5.69165	7.39552	7.0144
chr10_45141297_45141554	1.13295	5.03928	4.43989	0.826102	3.54345	1.82197	3.88971	4.53587	3.41382	7.37248	1.8333	3.72942	6.15435	3.91091	3.40208	4.93457	2.45655	5.30321	5.4191	7.11567	1.10788	4.22916	2.79788	3.83538	2.05382	4.42989	14.9623	4.32204	5.32194	4.93478	4.97678	4.44003	4.20567	4.87855	1.84888	3.5072
chr10_46213707_46213907	0	4.03143	6.21585	4.13051	2.65759	10.0209	2.91728	4.53587	0	4.6078	3.66661	4.66177	4.92348	1.95545	3.40208	3.94766	2.45655	1.76774	4.33528	8.1322	5.53938	0.845832	3.73051	1.91769	3.08074	2.21494	2.99247	3.45763	3.54796	3.94782	2.48839	2.22001	2.5234	1.62618	4.6222	4.67627
chr10_47117250_47117450	9.06364	14.11	4.43989	9.08712	13.2879	7.28789	18.4761	4.53587	5.97418	11.9803	10.0832	8.39119	9.84697	12.7104	5.95364	6.9084	7.36966	12.3742	9.75439	5.08262	7.75514	10.15	6.5284	11.5062	6.16147	8.85978	8.9774	8.64408	6.20893	6.90869	13.2714	5.92004	13.4582	6.50474	13.8666	12.8597
chr10_51544687_51544887	3.39886	2.01571	13.3197	5.78271	2.65759	3.64395	4.86213	4.53587	5.12073	1.84312	1.8333	1.86471	0	2.93318	4.2526	3.94766	1.22828	6.18708	1.08382	4.0661	5.53938	2.5375	2.79788	5.75308	3.08074	3.32242	1.99498	3.45763	7.9829	3.94782	5.80624	1.48001	6.72908	1.62618	3.69776	4.67627
chr10_53712954_53713154	3.39886	4.03143	5.32787	2.47831	2.65759	5.46592	0.972427	1.81435	4.26727	2.76468	4.58326	1.86471	3.69261	2.93318	11.9073	2.96074	4.91311	2.65161	2.16764	1.01652	2.21575	2.5375	0.932628	3.83538	4.10765	4.42989	2.99247	1.72882	2.66097	0.986956	3.31785	0.740005	1.68227	5.69165	2.77332	4.67627
chr10_54651513_54651725	3.39886	8.06285	3.55191	10.7393	6.20104	3.64395	4.86213	9.97891	1.70691	4.6078	2.74995	14.9177	2.46174	2.93318	5.95364	2.96074	2.45655	9.72256	4.33528	3.04957	0	5.92083	0.932628	1.91769	5.13456	4.42989	4.98744	6.91527	4.43495	2.96087	3.31785	2.22001	4.20567	3.25237	2.77332	1.16907
chr10_59727596_59727796	5.66477	7.055	13.3197	2.47831	0.885862	3.64395	1.94485	4.53587	4.26727	0.92156	2.74995	10.2559	2.46174	2.93318	5.95364	1.97383	1.22828	5.30321	1.08382	6.09915	2.21575	4.22916	1.86526	0.958846	3.08074	2.21494	4.98744	5.18645	0.886989	0.986956	4.14732	3.70002	0.841135	3.25237	0	3.5072
chr10_60000727_60000927	2.26591	2.01571	4.43989	6.60881	3.54345	2.73296	2.91728	3.62869	12.8018	2.76468	4.58326	6.52648	4.92348	2.93318	2.55156	1.97383	4.91311	3.53548	3.25146	4.0661	4.43151	1.69166	0.932628	4.79423	1.02691	2.21494	2.99247	3.45763	0.886989	4.93478	3.31785	3.70002	3.36454	4.87855	4.6222	2.33813
chr10_60560961_60561245	3.39886	4.03143	0.887978	1.6522	2.65759	5.46592	1.94485	5.44304	16.2156	5.52936	5.49991	7.45883	2.46174	0.977727	8.5052	1.97383	6.14139	2.65161	1.08382	5.08262	5.53938	2.5375	1.86526	4.79423	5.13456	4.42989	2.99247	7.77968	3.54796	4.93478	4.97678	3.70002	4.20567	1.62618	3.69776	2.33813
chr10_63084562_63084812	5.66477	1.00786	3.55191	3.30441	6.20104	2.73296	3.88971	10.8861	4.26727	4.6078	1.8333	1.86471	2.46174	6.84409	1.70104	0.986915	12.2828	3.53548	8.67057	0	4.43151	5.92083	2.79788	4.79423	4.10765	4.42989	6.98242	3.45763	7.09591	2.96087	0.829463	2.96002	5.04681	4.06546	3.69776	16.3669
chr10_64349801_64350047	7.93068	2.01571	5.32787	6.60881	2.65759	6.37691	12.6415	7.25739	3.41382	4.6078	2.74995	4.66177	7.38523	4.88863	1.70104	3.94766	2.45655	5.30321	3.25146	5.08262	2.21575	7.61249	2.79788	4.79423	8.2153	2.21494	2.99247	3.45763	3.54796	7.89565	4.14732	4.44003	3.36454	3.25237	1.84888	4.67627
chr10_64384014_64384234	3.39886	3.02357	6.21585	4.13051	1.77172	1.82197	11.6691	5.44304	3.41382	7.37248	4.58326	1.86471	4.92348	2.93318	2.55156	3.94766	3.68483	4.41934	2.16764	7.11567	4.43151	5.07499	5.59577	5.75308	2.05382	4.42989	2.99247	6.05086	2.66097	7.89565	2.48839	4.44003	4.20567	5.69165	5.54664	3.5072
chr10_65370704_65371021	3.39886	4.03143	4.43989	4.13051	6.20104	2.73296	2.91728	6.35022	18.776	2.76468	7.33321	5.59413	4.92348	5.86636	9.35572	2.96074	2.45655	2.65161	7.58674	9.14872	5.53938	4.22916	1.86526	3.83538	5.13456	4.42989	6.98242	8.64408	3.54796	3.94782	0.829463	5.92004	3.36454	6.50474	5.54664	5.84534
chr10_65594688_65594888	2.26591	7.055	6.21585	8.26102	9.74449	6.37691	4.86213	6.35022	13.6553	5.52936	4.58326	3.72942	6.15435	4.88863	5.10312	4.93457	1.22828	4.41934	6.50292	4.0661	5.53938	5.07499	2.79788	3.83538	5.13456	6.64483	5.98493	7.77968	4.43495	9.86956	7.46517	5.92004	5.88794	4.87855	4.6222	3.5072
chr10_66092941_66093141	1.13295	5.03928	2.66393	3.30441	3.54345	2.73296	3.88971	2.72152	4.26727	5.52936	6.41656	0.932354	2.46174	3.91091	2.55156	0	1.22828	1.76774	3.25146	2.03305	2.21575	3.38333	1.86526	2.87654	12.3229	2.21494	1.99498	3.45763	1.77398	1.97391	3.31785	1.48001	2.5234	4.06546	4.6222	4.67627
chr10_67622097_67622297	1.13295	1.00786	2.66393	0.826102	3.54345	4.55493	1.94485	4.53587	5.12073	2.76468	3.66661	1.86471	3.69261	2.93318	0.85052	0.986915	2.45655	4.41934	5.4191	4.0661	3.32363	6.76666	3.73051	1.91769	1.02691	3.32242	11.9699	4.32204	5.32194	2.96087	4.97678	4.44003	2.5234	0.813092	3.69776	1.16907
chr10_70047313_70047513	4.53182	4.03143	4.43989	2.47831	8.85862	3.64395	1.94485	0.907174	6.82764	2.76468	1.8333	4.66177	14.7705	4.88863	2.55156	2.96074	2.45655	4.41934	3.25146	5.08262	2.21575	4.22916	3.73051	5.75308	2.05382	2.21494	0.997489	4.32204	1.77398	2.96087	5.80624	5.18003	2.5234	4.87855	4.6222	3.5072
chr10_70856094_70856319	5.66477	10.0786	6.21585	3.30441	2.65759	1.82197	3.88971	1.81435	2.56036	5.52936	2.74995	2.79706	2.46174	3.91091	8.5052	3.94766	4.91311	7.95482	5.4191	2.03305	4.43151	4.22916	5.59577	3.83538	5.13456	2.21494	0.997489	4.32204	3.54796	16.7783	4.97678	2.96002	5.88794	6.50474	2.77332	4.67627
chr10_71936520_71936720	4.53182	6.04714	4.43989	4.95661	2.65759	3.64395	11.6691	4.53587	4.26727	5.52936	1.8333	2.79706	3.69261	3.91091	5.10312	2.96074	1.22828	1.76774	1.08382	9.14872	1.10788	5.92083	1.86526	3.83538	10.2691	2.21494	3.98995	1.72882	1.77398	3.94782	3.31785	5.18003	5.04681	2.43928	1.84888	5.84534
chr10_72176045_72176254	3.39886	3.02357	3.55191	3.30441	3.54345	1.82197	5.83456	2.72152	3.41382	2.76468	3.66661	1.86471	2.46174	3.91091	3.40208	5.92149	4.91311	2.65161	5.4191	3.04957	5.53938	2.5375	2.79788	2.87654	5.13456	4.42989	13.9648	2.59323	2.66097	2.96087	5.80624	1.48001	2.5234	6.50474	3.69776	2.33813
chr10_72594924_72595124	1.13295	2.01571	4.43989	3.30441	3.54345	4.55493	0.972427	5.44304	5.12073	4.6078	5.49991	2.79706	2.46174	4.88863	2.55156	3.94766	0	6.18708	15.1735	3.04957	4.43151	0.845832	5.59577	4.79423	4.10765	9.96725	6.98242	2.59323	0.886989	2.96087	0.829463	2.22001	5.88794	8.94402	6.47108	2.33813
chr10_73052336_73052575	6.79773	4.03143	2.66393	1.6522	1.77172	4.55493	3.88971	4.53587	2.56036	7.37248	6.41656	2.79706	6.15435	3.91091	2.55156	3.94766	2.45655	3.53548	2.16764	3.04957	13.2945	5.07499	3.73051	3.83538	5.13456	0	3.98995	2.59323	6.20893	4.93478	4.97678	4.44003	5.04681	4.06546	5.54664	3.5072
chr10_73954005_73954222	1.13295	5.03928	3.55191	5.78271	2.65759	3.64395	2.91728	0.907174	3.41382	5.52936	6.41656	3.72942	4.92348	2.93318	3.40208	6.9084	4.91311	2.65161	2.16764	5.08262	3.32363	0.845832	4.66314	4.79423	5.13456	5.53736	15.9598	6.05086	7.09591	0.986956	2.48839	0.740005	2.5234	5.69165	2.77332	0
chr10_74204565_74204766	3.39886	7.055	4.43989	1.6522	2.65759	1.82197	0.972427	9.07174	3.41382	2.76468	7.33321	4.66177	2.46174	4.88863	2.55156	4.93457	2.45655	3.53548	15.1735	2.03305	5.53938	5.07499	4.66314	7.67077	3.08074	6.64483	0.997489	4.32204	5.32194	2.96087	4.97678	5.18003	7.57021	6.50474	4.6222	3.5072
chr10_75032980_75033180	5.66477	1.00786	1.77596	2.47831	5.31517	0	4.86213	4.53587	5.97418	5.52936	2.74995	0.932354	14.7705	3.91091	2.55156	4.93457	2.45655	5.30321	2.16764	5.08262	4.43151	5.07499	4.66314	4.79423	4.10765	3.32242	3.98995	2.59323	4.43495	2.96087	4.14732	2.22001	1.68227	5.69165	0.92444	3.5072
chr10_75203264_75203508	9.06364	3.02357	2.66393	3.30441	10.6303	7.28789	1.94485	0.907174	3.41382	0.92156	4.58326	3.72942	17.2322	1.95545	3.40208	5.92149	6.14139	3.53548	11.922	0	4.43151	1.69166	1.86526	3.83538	4.10765	0	4.98744	5.18645	4.43495	6.90869	5.80624	2.96002	1.68227	0.813092	3.69776	1.16907
chr10_75911562_75911833	5.66477	7.055	6.21585	4.13051	7.0869	6.37691	5.83456	2.72152	5.97418	7.37248	6.41656	11.1883	18.4631	1.95545	5.95364	11.843	4.91311	2.65161	5.4191	5.08262	4.43151	3.38333	5.59577	4.79423	4.10765	2.21494	6.98242	4.32204	3.54796	5.92174	4.97678	5.92004	4.20567	5.69165	7.39552	7.0144
chr10_76465600_76465877	4.53182	4.03143	2.66393	7.43492	4.42931	3.64395	4.86213	4.53587	4.26727	3.68624	3.66661	5.59413	7.38523	7.82182	1.70104	0.986915	8.59794	3.53548	5.4191	4.0661	6.64726	4.22916	0.932628	3.83538	5.13456	16.6121	4.98744	5.18645	3.54796	9.86956	3.31785	5.92004	4.20567	6.50474	5.54664	8.18347
chr10_78994820_78995100	14.7284	4.03143	7.10383	8.26102	6.20104	7.28789	7.77942	3.62869	4.26727	2.76468	4.58326	0.932354	1.23087	0.977727	5.10312	2.96074	8.59794	7.95482	5.4191	7.11567	3.32363	4.22916	5.59577	1.91769	4.10765	4.42989	2.99247	3.45763	0.886989	1.97391	2.48839	2.96002	6.72908	4.06546	2.77332	3.5072
chr10_79477982_79478182	3.39886	1.00786	6.21585	2.47831	1.77172	3.64395	2.91728	6.35022	1.70691	3.68624	2.74995	3.72942	1.23087	2.93318	12.7578	4.93457	4.91311	1.76774	3.25146	5.08262	5.53938	3.38333	5.59577	5.75308	6.16147	2.21494	3.98995	0.864408	4.43495	0	3.31785	5.18003	1.68227	2.43928	1.84888	0
chr10_81826304_81826504	3.39886	2.01571	1.77596	3.30441	1.77172	1.82197	10.6967	2.72152	2.56036	2.76468	4.58326	4.66177	4.92348	2.93318	1.70104	4.93457	1.22828	4.41934	2.16764	2.03305	6.64726	1.69166	4.66314	3.83538	7.18839	7.75231	2.99247	5.18645	0.886989	4.93478	0.829463	3.70002	4.20567	1.62618	3.69776	2.33813
chr10_82938984_82939184	6.79773	2.01571	3.55191	4.13051	5.31517	0.910987	6.80699	5.44304	5.12073	3.68624	3.66661	0.932354	0	5.86636	5.10312	1.97383	6.14139	7.07095	4.33528	4.0661	5.53938	3.38333	0.932628	3.83538	14.3768	1.10747	2.99247	3.45763	2.66097	5.92174	4.14732	5.18003	1.68227	3.25237	3.69776	5.84534
chr10_86417475_86417675	0	4.03143	0.887978	2.47831	5.31517	3.64395	1.94485	0	12.8018	0.92156	4.58326	5.59413	1.23087	0	4.2526	3.94766	6.14139	3.53548	1.08382	6.09915	4.43151	1.69166	1.86526	2.87654	3.08074	5.53736	0.997489	0.864408	2.66097	2.96087	1.65893	1.48001	5.88794	0.813092	3.69776	2.33813
chr10_87372123_87372323	1.13295	6.04714	2.66393	4.95661	5.31517	4.55493	11.6691	3.62869	4.26727	7.37248	5.49991	4.66177	3.69261	6.84409	5.10312	3.94766	1.22828	10.6064	2.16764	1.01652	3.32363	4.22916	3.73051	8.62962	4.10765	2.21494	3.98995	5.18645	2.66097	2.96087	4.97678	3.70002	4.20567	4.06546	4.6222	2.33813
chr10_87794467_87794667	2.26591	3.02357	2.66393	1.6522	4.42931	2.73296	3.88971	4.53587	12.8018	1.84312	7.33321	3.72942	3.69261	1.95545	1.70104	8.88223	4.91311	3.53548	3.25146	4.0661	1.10788	4.22916	4.66314	1.91769	3.08074	1.10747	3.98995	6.91527	5.32194	0.986956	3.31785	5.92004	2.5234	4.06546	2.77332	3.5072
chr10_88820994_88821194	4.53182	1.00786	3.55191	4.13051	2.65759	3.64395	12.6415	1.81435	3.41382	1.84312	2.74995	5.59413	1.23087	3.91091	5.95364	0	7.36966	3.53548	2.16764	4.0661	1.10788	10.15	5.59577	3.83538	2.05382	4.42989	4.98744	3.45763	4.43495	1.97391	0.829463	4.44003	5.88794	1.62618	2.77332	2.33813
chr10_89264501_89264704	2.26591	7.055	5.32787	4.13051	7.97276	2.73296	3.88971	4.53587	5.12073	4.6078	3.66661	5.59413	7.38523	4.88863	5.10312	6.9084	4.91311	7.95482	8.67057	4.0661	5.53938	5.07499	7.46102	4.79423	10.2691	11.0747	4.98744	1.72882	5.32194	4.93478	6.6357	2.22001	5.04681	2.43928	5.54664	2.33813
chr10_91060750_91060950	2.26591	0	5.32787	4.95661	6.20104	5.46592	8.75184	1.81435	3.41382	1.84312	7.33321	1.86471	4.92348	5.86636	3.40208	5.92149	3.68483	5.30321	4.33528	2.03305	12.1866	4.22916	3.73051	7.67077	2.05382	4.42989	7.97991	2.59323	0.886989	4.93478	3.31785	4.44003	4.20567	2.43928	0.92444	3.5072
chr10_92605209_92605409	0	5.03928	4.43989	2.47831	4.42931	5.46592	12.6415	4.53587	1.70691	5.52936	0.916652	4.66177	3.69261	0.977727	4.2526	4.93457	6.14139	1.76774	1.08382	3.04957	2.21575	3.38333	1.86526	5.75308	4.10765	3.32242	1.99498	6.91527	0.886989	5.92174	0	3.70002	2.5234	3.25237	3.69776	4.67627
chr10_93044211_93044416	3.39886	4.03143	2.66393	3.30441	1.77172	2.73296	13.614	1.81435	1.70691	1.84312	3.66661	4.66177	4.92348	3.91091	5.10312	0.986915	2.45655	0.883869	2.16764	9.14872	1.10788	3.38333	6.5284	2.87654	6.16147	3.32242	5.98493	3.45763	4.43495	0.986956	4.97678	4.44003	4.20567	4.06546	2.77332	4.67627
chr10_93514671_93514871	0	2.01571	0.887978	0	0	1.82197	0.972427	0	0	0.92156	1.8333	0.932354	0	0.977727	0.85052	1.97383	4.91311	1.76774	0	0	0	0.845832	0	0	1.02691	0	0.997489	1.72882	2.66097	0	0.829463	0.740005	2.5234	2.43928	0	2.33813
chr10_93660798_93660998	2.26591	1.00786	1.77596	8.26102	4.42931	0.910987	12.6415	2.72152	2.56036	5.52936	4.58326	4.66177	4.92348	1.95545	4.2526	3.94766	3.68483	3.53548	3.25146	8.1322	2.21575	0.845832	5.59577	3.83538	6.16147	4.42989	3.98995	1.72882	2.66097	1.97391	5.80624	2.96002	8.41135	4.06546	2.77332	8.18347
chr10_94451456_94451660	3.39886	4.03143	4.43989	7.43492	2.65759	10.9318	16.5313	6.35022	3.41382	5.52936	7.33321	1.86471	4.92348	4.88863	5.10312	4.93457	4.91311	3.53548	2.16764	4.0661	6.64726	3.38333	3.73051	4.79423	3.08074	4.42989	3.98995	3.45763	7.09591	2.96087	3.31785	5.92004	4.20567	4.06546	3.69776	2.33813
chr10_95025196_95025396	7.93068	5.03928	3.55191	4.13051	4.42931	4.55493	3.88971	7.25739	5.12073	5.52936	2.74995	3.72942	3.69261	2.93318	2.55156	2.96074	6.14139	2.65161	13.0058	3.04957	4.43151	1.69166	2.79788	3.83538	3.08074	0	3.98995	2.59323	4.43495	3.94782	4.14732	4.44003	3.36454	1.62618	3.69776	4.67627
chr10_95653160_95653530	2.26591	5.03928	6.21585	1.6522	5.31517	7.28789	6.80699	3.62869	0.853455	8.29404	3.66661	3.72942	6.15435	5.86636	7.65468	5.92149	7.36966	0.883869	13.0058	4.0661	19.9418	2.5375	5.59577	5.75308	10.2691	6.64483	3.98995	8.64408	3.54796	4.93478	5.80624	7.40005	5.88794	6.50474	7.39552	4.67627
chr10_96221053_96221262	2.26591	4.03143	0.887978	3.30441	5.31517	5.46592	3.88971	8.16456	5.12073	4.6078	5.49991	4.66177	3.69261	5.86636	5.10312	2.96074	1.22828	2.65161	2.16764	7.11567	3.32363	6.76666	2.79788	3.83538	2.05382	4.42989	12.9674	1.72882	1.77398	1.97391	3.31785	2.96002	3.36454	8.13092	3.69776	3.5072
chr10_96883910_96884110	1.13295	4.03143	2.66393	1.6522	2.65759	3.64395	1.94485	5.44304	2.56036	2.76468	1.8333	4.66177	14.7705	7.82182	3.40208	1.97383	2.45655	1.76774	4.33528	2.03305	3.32363	4.22916	1.86526	2.87654	5.13456	6.64483	8.9774	2.59323	4.43495	1.97391	1.65893	7.40005	1.68227	5.69165	1.84888	7.0144
chr10_102613481_102613739	5.66477	4.03143	4.43989	8.26102	6.20104	1.82197	1.94485	6.35022	5.12073	0	4.58326	5.59413	4.92348	1.95545	2.55156	2.96074	2.45655	8.83869	1.08382	3.04957	5.53938	6.76666	4.66314	2.87654	15.4037	1.10747	2.99247	10.3729	6.20893	3.94782	3.31785	1.48001	3.36454	2.43928	4.6222	1.16907
chr10_104532607_104532807	4.53182	3.02357	2.66393	4.13051	4.42931	1.82197	1.94485	8.16456	5.12073	3.68624	0.916652	5.59413	4.92348	3.91091	4.2526	1.97383	4.91311	6.18708	3.25146	5.08262	6.64726	5.07499	4.66314	8.62962	2.05382	2.21494	14.9623	3.45763	4.43495	1.97391	4.14732	6.66004	5.88794	4.87855	7.39552	7.0144
chr10_104616601_104616865	4.53182	3.02357	6.21585	4.13051	5.31517	4.55493	14.5864	6.35022	5.12073	7.37248	6.41656	7.45883	7.38523	3.91091	2.55156	5.92149	2.45655	3.53548	6.50292	6.09915	3.32363	5.92083	1.86526	4.79423	3.08074	7.75231	3.98995	5.18645	2.66097	3.94782	8.29463	2.22001	4.20567	4.06546	3.69776	0
chr10_104883976_104884216	1.13295	0	4.43989	3.30441	6.20104	1.82197	1.94485	2.72152	3.41382	1.84312	7.33321	3.72942	3.69261	4.88863	3.40208	2.96074	4.91311	5.30321	3.25146	5.08262	2.21575	3.38333	3.73051	2.87654	12.3229	5.53736	1.99498	0.864408	3.54796	1.97391	4.14732	2.96002	4.20567	1.62618	4.6222	1.16907
chr10_104974041_104974310	15.8614	5.03928	5.32787	3.30441	1.77172	4.55493	4.86213	4.53587	5.97418	4.6078	4.58326	3.72942	2.46174	4.88863	5.10312	3.94766	3.68483	1.76774	2.16764	3.04957	7.75514	2.5375	4.66314	4.79423	2.05382	5.53736	4.98744	1.72882	3.54796	2.96087	0.829463	6.66004	5.04681	7.31783	8.31996	2.33813
chr10_105010726_105010926	18.1273	15.1179	13.3197	13.2176	11.5162	12.7538	17.5037	15.422	11.0949	17.5096	17.4164	15.85	11.0778	14.6659	11.0568	17.7645	15.9676	13.258	17.3411	20.3305	6.64726	12.6875	21.4504	16.3004	16.4306	18.827	12.9674	3.45763	17.7398	8.88261	13.2714	20.7201	14.2993	15.4488	14.791	11.6907
chr10_107943657_107943857	5.66477	1.00786	2.66393	2.47831	0.885862	4.55493	4.86213	4.53587	1.70691	2.76468	1.8333	5.59413	2.46174	4.88863	13.6083	4.93457	3.68483	4.41934	5.4191	2.03305	4.43151	1.69166	4.66314	5.75308	2.05382	3.32242	3.98995	3.45763	6.20893	4.93478	0.829463	2.22001	3.36454	0.813092	1.84888	4.67627
chr10_108163095_108163295	6.79773	3.02357	1.77596	2.47831	5.31517	8.19888	2.91728	2.72152	0.853455	0.92156	3.66661	1.86471	3.69261	1.95545	2.55156	2.96074	4.91311	7.07095	3.25146	3.04957	11.0788	3.38333	1.86526	1.91769	5.13456	4.42989	3.98995	2.59323	0	2.96087	4.97678	2.96002	4.20567	4.87855	3.69776	3.5072
chr10_108211771_108211993	1.13295	3.02357	1.77596	4.95661	2.65759	14.5758	3.88971	2.72152	4.26727	1.84312	0.916652	3.72942	3.69261	0.977727	1.70104	1.97383	1.22828	5.30321	4.33528	2.03305	4.43151	10.15	2.79788	5.75308	2.05382	0	4.98744	2.59323	0.886989	0.986956	4.97678	2.22001	1.68227	2.43928	2.77332	3.5072
chr10_108291604_108291860	4.53182	4.03143	3.55191	5.78271	3.54345	4.55493	0.972427	3.62869	4.26727	3.68624	6.41656	1.86471	4.92348	5.86636	2.55156	4.93457	1.22828	4.41934	2.16764	7.11567	1.10788	4.22916	1.86526	3.83538	14.3768	5.53736	4.98744	3.45763	6.20893	5.92174	1.65893	3.70002	3.36454	1.62618	8.31996	3.5072
chr10_108630763_108631064	4.53182	4.03143	2.66393	4.13051	6.20104	9.10987	4.86213	4.53587	3.41382	6.45092	3.66661	2.79706	1.23087	7.82182	4.2526	3.94766	1.22828	7.07095	3.25146	7.11567	6.64726	4.22916	0.932628	4.79423	14.3768	2.21494	6.98242	2.59323	2.66097	7.89565	2.48839	4.44003	5.04681	3.25237	1.84888	3.5072
chr10_111048881_111049138	3.39886	4.03143	4.43989	4.13051	0.885862	7.28789	14.5864	2.72152	5.97418	1.84312	3.66661	0.932354	11.0778	4.88863	2.55156	4.93457	2.45655	8.83869	8.67057	1.01652	3.32363	2.5375	3.73051	0.958846	2.05382	2.21494	3.98995	5.18645	1.77398	4.93478	2.48839	2.96002	2.5234	4.87855	4.6222	1.16907
chr10_111259443_111259643	2.26591	1.00786	4.43989	4.13051	5.31517	0	5.83456	1.81435	11.9484	0.92156	2.74995	1.86471	1.23087	4.88863	5.10312	1.97383	6.14139	4.41934	3.25146	3.04957	0	3.38333	3.73051	4.79423	4.10765	1.10747	2.99247	0.864408	1.77398	3.94782	0	4.44003	3.36454	1.62618	2.77332	4.67627
chr10_111272655_111272855	3.39886	3.02357	4.43989	5.78271	1.77172	7.28789	3.88971	5.44304	5.12073	2.76468	3.66661	3.72942	7.38523	2.93318	0.85052	9.86915	2.45655	7.95482	8.67057	1.01652	3.32363	5.07499	5.59577	5.75308	3.08074	4.42989	4.98744	2.59323	2.66097	0.986956	1.65893	3.70002	3.36454	5.69165	2.77332	3.5072
chr10_111550016_111550216	3.39886	3.02357	1.77596	1.6522	2.65759	4.55493	5.83456	6.35022	5.12073	2.76468	6.41656	3.72942	7.38523	3.91091	0	0.986915	3.68483	3.53548	2.16764	1.01652	4.43151	2.5375	1.86526	3.83538	0	5.53736	3.98995	7.77968	4.43495	2.96087	1.65893	4.44003	1.68227	6.50474	5.54664	15.1979
chr10_111580860_111581060	3.39886	8.06285	0	2.47831	1.77172	4.55493	0.972427	7.25739	2.56036	5.52936	5.49991	7.45883	6.15435	3.91091	5.10312	2.96074	3.68483	4.41934	3.25146	3.04957	1.10788	0.845832	2.79788	4.79423	4.10765	2.21494	5.98493	4.32204	0.886989	3.94782	4.97678	0	1.68227	4.87855	2.77332	12.8597
chr10_111979517_111979717	9.06364	6.04714	2.66393	9.08712	1.77172	2.73296	3.88971	1.81435	2.56036	3.68624	4.58326	1.86471	1.23087	2.93318	1.70104	2.96074	4.91311	0.883869	1.08382	3.04957	3.32363	2.5375	1.86526	0.958846	13.3499	2.21494	1.99498	4.32204	5.32194	2.96087	1.65893	3.70002	2.5234	3.25237	3.69776	2.33813
chr10_114105544_114105900	2.26591	2.01571	3.55191	8.26102	0.885862	3.64395	4.86213	4.53587	1.70691	7.37248	6.41656	5.59413	4.92348	4.88863	5.95364	4.93457	1.22828	2.65161	5.4191	3.04957	1.10788	3.38333	3.73051	3.83538	2.05382	2.21494	15.9598	4.32204	7.09591	0.986956	2.48839	4.44003	5.88794	4.06546	3.69776	2.33813
chr10_115404222_115404422	9.06364	5.03928	2.66393	3.30441	7.0869	1.82197	6.80699	3.62869	7.68109	4.6078	2.74995	1.86471	0	2.93318	4.2526	0.986915	3.68483	5.30321	4.33528	2.03305	14.4024	1.69166	3.73051	5.75308	1.02691	2.21494	3.98995	3.45763	4.43495	2.96087	4.14732	1.48001	3.36454	7.31783	3.69776	5.84534
chr10_116893641_116893841	3.39886	1.00786	0	0.826102	1.77172	4.55493	1.94485	1.81435	1.70691	4.6078	0.916652	2.79706	1.23087	1.95545	4.2526	0	1.22828	2.65161	6.50292	2.03305	8.86302	0.845832	2.79788	1.91769	3.08074	1.10747	3.98995	1.72882	2.66097	1.97391	2.48839	1.48001	0.841135	4.87855	0.92444	2.33813
chr10_117511595_117511795	1.13295	3.02357	2.66393	2.47831	1.77172	14.5758	5.83456	3.62869	1.70691	3.68624	4.58326	4.66177	1.23087	3.91091	3.40208	2.96074	3.68483	2.65161	3.25146	2.03305	3.32363	4.22916	3.73051	3.83538	3.08074	3.32242	1.99498	3.45763	2.66097	3.94782	0.829463	1.48001	1.68227	3.25237	4.6222	2.33813
chr10_119830872_119831072	4.53182	8.06285	7.10383	3.30441	2.65759	6.37691	0.972427	1.81435	6.82764	6.45092	8.24986	3.72942	14.7705	0.977727	1.70104	2.96074	2.45655	1.76774	7.58674	3.04957	2.21575	5.92083	4.66314	2.87654	8.2153	3.32242	5.98493	4.32204	0.886989	4.93478	2.48839	3.70002	5.88794	1.62618	5.54664	1.16907
chr10_121312932_121313132	4.53182	3.02357	4.43989	6.60881	4.42931	4.55493	12.6415	6.35022	2.56036	3.68624	4.58326	4.66177	4.92348	2.93318	3.40208	2.96074	2.45655	2.65161	4.33528	4.0661	7.75514	4.22916	1.86526	5.75308	8.2153	4.42989	0.997489	2.59323	2.66097	4.93478	1.65893	1.48001	0.841135	1.62618	2.77332	4.67627
chr10_121833204_121833404	6.79773	6.04714	3.55191	4.13051	3.54345	3.64395	2.91728	5.44304	4.26727	3.68624	3.66661	0.932354	2.46174	5.86636	3.40208	4.93457	3.68483	1.76774	4.33528	4.0661	14.4024	4.22916	0.932628	2.87654	4.10765	6.64483	5.98493	4.32204	0.886989	1.97391	5.80624	6.66004	5.04681	5.69165	5.54664	5.84534
chr10_124537684_124537884	14.7284	3.02357	2.66393	3.30441	8.85862	2.73296	5.83456	4.53587	2.56036	4.6078	5.49991	1.86471	0	1.95545	3.40208	9.86915	3.68483	2.65161	2.16764	2.03305	2.21575	2.5375	6.5284	2.87654	3.08074	4.42989	2.99247	1.72882	6.20893	0.986956	0.829463	5.18003	2.5234	3.25237	4.6222	1.16907
chr10_124892719_124893056	5.66477	4.03143	7.10383	1.6522	7.0869	4.55493	17.5037	8.16456	5.97418	5.52936	6.41656	6.52648	6.15435	4.88863	3.40208	2.96074	8.59794	6.18708	5.4191	12.1983	7.75514	2.5375	12.1242	8.62962	5.13456	6.64483	5.98493	6.91527	5.32194	2.96087	3.31785	5.18003	9.25248	3.25237	6.47108	7.0144
chr10_124899710_124899916	4.53182	3.02357	3.55191	5.78271	2.65759	2.73296	4.86213	0.907174	2.56036	5.52936	3.66661	7.45883	3.69261	2.93318	2.55156	0.986915	4.91311	2.65161	1.08382	3.04957	2.21575	5.07499	10.2589	3.83538	2.05382	1.10747	0.997489	6.05086	0.886989	14.8043	4.97678	2.96002	1.68227	4.06546	3.69776	4.67627
chr10_125141789_125142018	3.39886	2.01571	4.43989	1.6522	5.31517	6.37691	2.91728	1.81435	3.41382	6.45092	4.58326	0.932354	1.23087	3.91091	2.55156	2.96074	3.68483	2.65161	5.4191	1.01652	7.75514	0.845832	3.73051	0.958846	3.08074	4.42989	11.9699	3.45763	5.32194	4.93478	3.31785	5.92004	5.04681	2.43928	3.69776	8.18347
chr10_125392637_125392837	2.26591	8.06285	2.66393	1.6522	5.31517	4.55493	4.86213	5.44304	0.853455	2.76468	5.49991	5.59413	0	3.91091	1.70104	0	4.91311	7.07095	7.58674	2.03305	6.64726	3.38333	2.79788	4.79423	6.16147	2.21494	12.9674	5.18645	6.20893	4.93478	4.97678	3.70002	2.5234	7.31783	3.69776	2.33813
chr10_125607893_125608154	2.26591	6.04714	7.10383	5.78271	4.42931	3.64395	3.88971	4.53587	6.82764	7.37248	1.8333	2.79706	3.69261	6.84409	3.40208	4.93457	4.91311	3.53548	7.58674	2.03305	3.32363	4.22916	1.86526	3.83538	4.10765	3.32242	3.98995	6.05086	7.09591	0.986956	4.97678	4.44003	1.68227	4.87855	3.69776	16.3669
chr10_125624505_125624830	4.53182	4.03143	3.55191	4.13051	7.0869	2.73296	3.88971	4.53587	2.56036	5.52936	6.41656	5.59413	4.92348	2.93318	5.10312	2.96074	7.36966	7.07095	1.08382	3.04957	3.32363	0.845832	0.932628	2.87654	4.10765	16.6121	4.98744	10.3729	7.09591	0.986956	2.48839	6.66004	2.5234	4.87855	7.39552	4.67627
chr10_126411138_126411338	12.4625	2.01571	0	4.13051	6.20104	5.46592	6.80699	1.81435	3.41382	2.76468	3.66661	3.72942	3.69261	3.91091	4.2526	0	6.14139	1.76774	5.4191	6.09915	1.10788	4.22916	1.86526	4.79423	4.10765	4.42989	2.99247	3.45763	3.54796	4.93478	2.48839	1.48001	3.36454	2.43928	2.77332	2.33813
chr10_126723815_126724079	5.66477	10.0786	1.77596	2.47831	5.31517	1.82197	4.86213	3.62869	3.41382	4.6078	1.8333	4.66177	6.15435	4.88863	14.4588	7.89532	7.36966	2.65161	5.4191	8.1322	2.21575	0	2.79788	6.71192	6.16147	3.32242	5.98493	1.72882	1.77398	3.94782	4.14732	7.40005	4.20567	4.87855	6.47108	2.33813
chr10_127578360_127578601	16.9943	16.1257	14.2077	20.6525	8.85862	21.8637	27.228	12.7004	18.776	17.5096	21.083	14.9177	25.8483	15.6436	13.6083	9.86915	17.1959	17.6774	19.5088	20.3305	27.6969	22.8375	18.6526	22.0535	18.4844	29.9018	17.9548	15.5594	15.9658	8.88261	16.5893	17.7601	16.8227	13.8226	23.111	17.536
chr10_129392305_129392505	6.79773	1.00786	7.9918	4.13051	1.77172	1.82197	0	1.81435	5.12073	0.92156	4.58326	13.9853	2.46174	2.93318	4.2526	0.986915	1.22828	2.65161	2.16764	4.0661	3.32363	0	4.66314	5.75308	2.05382	6.64483	1.99498	1.72882	3.54796	3.94782	4.14732	3.70002	2.5234	4.06546	2.77332	1.16907
chr10_130694994_130695194	3.39886	5.03928	4.43989	1.6522	4.42931	4.55493	3.88971	0.907174	5.12073	7.37248	3.66661	2.79706	1.23087	0.977727	2.55156	4.93457	4.91311	1.76774	3.25146	2.03305	2.21575	0.845832	6.5284	1.91769	5.13456	6.64483	3.98995	2.59323	3.54796	6.90869	7.46517	5.18003	5.88794	1.62618	5.54664	15.1979
chr10_132263778_132263978	2.26591	2.01571	2.66393	4.13051	1.77172	2.73296	1.94485	4.53587	2.56036	4.6078	0.916652	4.66177	2.46174	0.977727	6.80416	0.986915	2.45655	1.76774	4.33528	1.01652	12.1866	2.5375	1.86526	2.87654	3.08074	4.42989	1.99498	4.32204	5.32194	5.92174	3.31785	2.22001	1.68227	3.25237	2.77332	3.5072
chr10_133655562_133655768	5.66477	3.02357	7.10383	5.78271	7.97276	4.55493	3.88971	2.72152	2.56036	1.84312	3.66661	1.86471	3.69261	3.91091	9.35572	2.96074	8.59794	2.65161	3.25146	4.0661	4.43151	0.845832	2.79788	2.87654	3.08074	6.64483	0.997489	3.45763	1.77398	5.92174	2.48839	4.44003	5.88794	4.06546	0.92444	8.18347
chr10_135478282_135478537	0	0	0	0	1.77172	0	0	0.907174	0	0	0.916652	0	0	0	0	2.96074	0	0.883869	0	0	2.21575	0	0	0	0	0	2.99247	0	0	0	0.829463	0.740005	0.841135	0	0	1.16907
chr11_264414_264614	0	3.02357	4.43989	4.13051	3.54345	5.46592	2.91728	3.62869	6.82764	1.84312	5.49991	2.79706	2.46174	1.95545	2.55156	5.92149	3.68483	4.41934	8.67057	3.04957	2.21575	5.92083	3.73051	4.79423	1.02691	0	9.97489	2.59323	2.66097	4.93478	5.80624	5.18003	0.841135	4.06546	3.69776	2.33813
chr11_431226_431480	5.66477	3.02357	0	8.26102	6.20104	4.55493	2.91728	4.53587	6.82764	2.76468	2.74995	3.72942	6.15435	5.86636	6.80416	8.88223	4.91311	2.65161	6.50292	4.0661	2.21575	2.5375	4.66314	5.75308	3.08074	3.32242	5.98493	4.32204	7.09591	2.96087	5.80624	2.22001	10.0936	6.50474	1.84888	3.5072
chr11_587851_588051	9.06364	6.04714	3.55191	4.13051	3.54345	4.55493	2.91728	4.53587	7.68109	6.45092	9.16652	0.932354	3.69261	0.977727	4.2526	1.97383	4.91311	0.883869	2.16764	5.08262	5.53938	3.38333	5.59577	2.87654	3.08074	5.53736	12.9674	1.72882	4.43495	4.93478	8.29463	8.14005	4.20567	2.43928	3.69776	5.84534
chr11_819484_819733	6.79773	7.055	7.9918	3.30441	9.74449	9.10987	6.80699	19.0506	7.68109	6.45092	9.16652	4.66177	1.23087	8.79954	5.95364	8.88223	11.0545	8.83869	10.8382	7.11567	9.97089	9.30416	3.73051	8.62962	10.2691	11.0747	8.9774	12.9661	7.9829	5.92174	6.6357	3.70002	7.57021	4.06546	8.31996	5.84534
chr11_934415_934647	3.39886	2.01571	4.43989	2.47831	2.65759	0.910987	1.94485	4.53587	7.68109	3.68624	1.8333	5.59413	3.69261	5.86636	5.10312	3.94766	3.68483	6.18708	3.25146	4.0661	5.53938	5.92083	3.73051	6.71192	6.16147	3.32242	14.9623	4.32204	5.32194	0.986956	7.46517	2.22001	5.88794	5.69165	5.54664	3.5072
chr11_975373_975633	3.39886	8.06285	7.10383	10.7393	7.0869	8.19888	1.94485	11.7933	7.68109	8.29404	11.9165	5.59413	3.69261	7.82182	5.10312	9.86915	6.14139	4.41934	5.4191	7.11567	13.2945	7.61249	6.5284	3.83538	4.10765	7.75231	7.97991	6.05086	14.1918	4.93478	7.46517	4.44003	5.88794	4.06546	6.47108	5.84534
chr11_2320068_2320284	1.13295	5.03928	6.21585	4.95661	4.42931	3.64395	3.88971	15.422	3.41382	5.52936	2.74995	4.66177	2.46174	2.93318	3.40208	1.97383	1.22828	3.53548	7.58674	4.0661	4.43151	5.07499	4.66314	4.79423	0	4.42989	1.99498	1.72882	1.77398	3.94782	6.6357	2.96002	2.5234	4.06546	2.77332	2.33813
chr11_3013582_3013782	4.53182	7.055	4.43989	9.08712	8.85862	4.55493	4.86213	9.07174	7.68109	5.52936	5.49991	16.7824	4.92348	6.84409	10.2062	2.96074	2.45655	9.72256	4.33528	10.1652	6.64726	6.76666	9.32628	7.67077	8.2153	11.0747	12.9674	6.05086	5.32194	2.96087	9.95356	8.14005	4.20567	8.94402	6.47108	8.18347
chr11_3470021_3470232	3.39886	6.04714	11.5437	9.91322	4.42931	4.55493	12.6415	9.97891	7.68109	6.45092	9.16652	2.79706	7.38523	3.91091	7.65468	8.88223	2.45655	3.53548	8.67057	8.1322	5.53938	7.61249	6.5284	8.62962	7.18839	19.9345	5.98493	7.77968	3.54796	7.89565	4.97678	10.3601	9.25248	8.94402	11.0933	4.67627
chr11_4365422_4365622	2.26591	7.055	2.66393	6.60881	7.0869	5.46592	2.91728	5.44304	10.2415	5.52936	8.24986	4.66177	3.69261	3.91091	4.2526	3.94766	7.36966	1.76774	2.16764	4.0661	3.32363	6.76666	3.73051	4.79423	6.16147	2.21494	0.997489	4.32204	5.32194	3.94782	9.95356	2.96002	10.0936	6.50474	2.77332	5.84534
chr11_6162290_6162512	4.53182	6.04714	0.887978	3.30441	3.54345	3.64395	2.91728	3.62869	3.41382	2.76468	2.74995	2.79706	3.69261	6.84409	3.40208	0.986915	4.91311	1.76774	4.33528	3.04957	14.4024	3.38333	0.932628	3.83538	3.08074	5.53736	0.997489	7.77968	2.66097	2.96087	5.80624	2.22001	2.5234	3.25237	5.54664	3.5072
chr11_7725603_7725803	2.26591	4.03143	2.66393	4.13051	4.42931	3.64395	3.88971	3.62869	1.70691	5.52936	0.916652	1.86471	7.38523	1.95545	9.35572	2.96074	6.14139	1.76774	0	4.0661	12.1866	4.22916	8.39365	3.83538	1.02691	3.32242	0	2.59323	3.54796	0.986956	2.48839	4.44003	5.88794	3.25237	4.6222	4.67627
chr11_8446074_8446274	2.26591	1.00786	0.887978	2.47831	1.77172	0.910987	1.94485	0.907174	3.41382	3.68624	3.66661	7.45883	1.23087	4.88863	2.55156	2.96074	2.45655	1.76774	1.08382	0	3.32363	4.22916	3.73051	1.91769	1.02691	3.32242	4.98744	0.864408	4.43495	0.986956	2.48839	1.48001	3.36454	5.69165	0	1.16907
chr11_9036511_9036769	4.53182	4.03143	0	2.47831	9.74449	3.64395	2.91728	7.25739	2.56036	7.37248	7.33321	0.932354	1.23087	1.95545	3.40208	3.94766	3.68483	6.18708	3.25146	2.03305	18.8339	5.92083	4.66314	6.71192	4.10765	3.32242	6.98242	3.45763	0.886989	1.97391	5.80624	4.44003	5.04681	5.69165	4.6222	5.84534
chr11_10116264_10116464	6.79773	1.00786	4.43989	3.30441	3.54345	2.73296	0.972427	1.81435	5.12073	5.52936	0.916652	2.79706	6.15435	1.95545	4.2526	2.96074	11.0545	4.41934	14.0897	2.03305	1.10788	2.5375	2.79788	3.83538	2.05382	3.32242	0.997489	2.59323	3.54796	4.93478	4.97678	3.70002	3.36454	2.43928	3.69776	2.33813
chr11_11844374_11844574	1.13295	2.01571	7.9918	4.95661	1.77172	1.82197	3.88971	1.81435	5.97418	4.6078	1.8333	1.86471	7.38523	1.95545	4.2526	5.92149	4.91311	4.41934	4.33528	5.08262	13.2945	5.07499	3.73051	0.958846	1.02691	4.42989	3.98995	4.32204	5.32194	9.86956	4.14732	2.96002	1.68227	1.62618	1.84888	1.16907
chr11_12111028_12111228	3.39886	2.01571	2.66393	3.30441	3.54345	1.82197	0.972427	3.62869	1.70691	1.84312	6.41656	5.59413	2.46174	0	2.55156	4.93457	2.45655	1.76774	6.50292	5.08262	1.10788	2.5375	1.86526	2.87654	2.05382	11.0747	1.99498	1.72882	5.32194	1.97391	4.97678	4.44003	3.36454	0	0	7.0144
chr11_12520685_12520938	2.26591	3.02357	1.77596	3.30441	0.885862	1.82197	12.6415	0.907174	8.53455	0.92156	5.49991	2.79706	1.23087	2.93318	5.95364	3.94766	4.91311	4.41934	2.16764	4.0661	2.21575	0.845832	4.66314	3.83538	4.10765	1.10747	2.99247	1.72882	4.43495	7.89565	4.14732	2.96002	4.20567	1.62618	2.77332	5.84534
chr11_15821846_15822058	6.79773	6.04714	2.66393	0.826102	8.85862	4.55493	5.83456	5.44304	3.41382	5.52936	4.58326	0.932354	4.92348	2.93318	11.9073	2.96074	4.91311	2.65161	7.58674	3.04957	3.32363	2.5375	4.66314	6.71192	4.10765	4.42989	10.9724	2.59323	7.9829	1.97391	3.31785	2.96002	5.04681	6.50474	6.47108	2.33813
chr11_16056913_16057118	1.13295	5.03928	0.887978	1.6522	3.54345	6.37691	4.86213	3.62869	3.41382	5.52936	7.33321	2.79706	6.15435	4.88863	4.2526	1.97383	3.68483	4.41934	2.16764	3.04957	2.21575	2.5375	2.79788	7.67077	6.16147	6.64483	2.99247	4.32204	4.43495	15.7913	5.80624	2.22001	1.68227	8.13092	6.47108	1.16907
chr11_17145314_17145514	5.66477	4.03143	1.77596	2.47831	5.31517	2.73296	4.86213	3.62869	1.70691	0.92156	3.66661	3.72942	2.46174	2.93318	3.40208	2.96074	8.59794	3.53548	2.16764	2.03305	2.21575	5.07499	3.73051	2.87654	6.16147	1.10747	11.9699	4.32204	7.09591	3.94782	5.80624	4.44003	4.20567	1.62618	4.6222	2.33813
chr11_18666326_18666526	3.39886	2.01571	4.43989	3.30441	0.885862	4.55493	6.80699	3.62869	4.26727	6.45092	5.49991	2.79706	3.69261	5.86636	2.55156	1.97383	3.68483	4.41934	3.25146	5.08262	2.21575	5.07499	1.86526	2.87654	5.13456	3.32242	2.99247	2.59323	5.32194	1.97391	4.14732	3.70002	5.04681	4.87855	0.92444	16.3669
chr11_24307139_24307339	2.26591	1.00786	2.66393	5.78271	6.20104	4.55493	1.94485	3.62869	12.8018	2.76468	4.58326	5.59413	2.46174	1.95545	1.70104	1.97383	2.45655	4.41934	0	5.08262	2.21575	0.845832	2.79788	4.79423	3.08074	7.75231	1.99498	4.32204	3.54796	2.96087	4.14732	0.740005	2.5234	2.43928	2.77332	1.16907
chr11_25425660_25425860	2.26591	7.055	4.43989	3.30441	2.65759	0.910987	1.94485	1.81435	5.12073	1.84312	4.58326	2.79706	0	2.93318	1.70104	2.96074	6.14139	1.76774	2.16764	4.0661	5.53938	3.38333	2.79788	3.83538	2.05382	1.10747	12.9674	3.45763	8.86989	1.97391	3.31785	2.22001	4.20567	3.25237	2.77332	0
chr11_29003486_29003688	3.39886	5.03928	5.32787	1.6522	1.77172	5.46592	2.91728	6.35022	14.5087	2.76468	5.49991	1.86471	3.69261	2.93318	1.70104	1.97383	2.45655	0.883869	3.25146	2.03305	2.21575	2.5375	2.79788	2.87654	1.02691	0	5.98493	6.91527	1.77398	0.986956	4.97678	2.22001	0.841135	4.06546	2.77332	3.5072
chr11_29150628_29150853	1.13295	3.02357	6.21585	7.43492	1.77172	4.55493	4.86213	6.35022	3.41382	2.76468	6.41656	5.59413	2.46174	6.84409	3.40208	1.97383	6.14139	1.76774	2.16764	8.1322	14.4024	2.5375	3.73051	3.83538	4.10765	3.32242	4.98744	6.05086	2.66097	4.93478	2.48839	2.22001	3.36454	4.87855	3.69776	3.5072
chr11_30887939_30888139	4.53182	2.01571	0.887978	0.826102	5.31517	6.37691	2.91728	3.62869	5.12073	2.76468	3.66661	7.45883	1.23087	2.93318	5.10312	4.93457	4.91311	3.53548	15.1735	2.03305	1.10788	4.22916	0.932628	3.83538	1.02691	2.21494	1.99498	4.32204	5.32194	2.96087	2.48839	6.66004	1.68227	2.43928	8.31996	1.16907
chr11_33000424_33000674	4.53182	4.03143	4.43989	3.30441	5.31517	5.46592	14.5864	7.25739	2.56036	3.68624	2.74995	6.52648	3.69261	0	1.70104	2.96074	2.45655	3.53548	5.4191	6.09915	6.64726	3.38333	3.73051	0.958846	1.02691	1.10747	1.99498	6.05086	6.20893	3.94782	4.97678	1.48001	2.5234	4.87855	4.6222	2.33813
chr11_34350261_34350461	3.39886	2.01571	14.2077	4.13051	7.0869	3.64395	2.91728	1.81435	8.53455	1.84312	2.74995	2.79706	3.69261	3.91091	3.40208	4.93457	2.45655	1.76774	0	4.0661	3.32363	3.38333	3.73051	2.87654	6.16147	5.53736	0.997489	2.59323	4.43495	3.94782	4.97678	4.44003	4.20567	2.43928	3.69776	1.16907
chr11_34484654_34484854	7.93068	4.03143	4.43989	7.43492	3.54345	3.64395	4.86213	5.44304	2.56036	1.84312	2.74995	13.053	6.15435	2.93318	1.70104	2.96074	4.91311	1.76774	1.08382	8.1322	7.75514	7.61249	4.66314	6.71192	1.02691	7.75231	7.97991	1.72882	0.886989	4.93478	6.6357	2.96002	5.04681	4.06546	4.6222	4.67627
chr11_35270139_35270339	1.13295	4.03143	5.32787	4.95661	3.54345	2.73296	3.88971	3.62869	5.97418	2.76468	1.8333	2.79706	2.46174	4.88863	5.10312	3.94766	4.91311	0.883869	7.58674	5.08262	4.43151	4.22916	2.79788	2.87654	1.02691	5.53736	4.98744	2.59323	4.43495	2.96087	4.14732	2.22001	2.5234	2.43928	2.77332	5.84534
chr11_35329834_35330045	5.66477	4.03143	4.43989	7.43492	4.42931	1.82197	1.94485	2.72152	2.56036	4.6078	3.66661	3.72942	2.46174	3.91091	12.7578	6.9084	7.36966	2.65161	3.25146	7.11567	1.10788	4.22916	4.66314	3.83538	8.2153	2.21494	5.98493	4.32204	6.20893	6.90869	9.95356	2.96002	5.04681	3.25237	4.6222	8.18347
chr11_35659475_35659675	1.13295	3.02357	2.66393	2.47831	8.85862	4.55493	3.88971	3.62869	2.56036	1.84312	5.49991	3.72942	3.69261	3.91091	5.10312	2.96074	6.14139	2.65161	11.922	11.1818	5.53938	3.38333	1.86526	2.87654	7.18839	3.32242	5.98493	2.59323	9.75688	4.93478	2.48839	2.22001	5.04681	1.62618	2.77332	3.5072
chr11_36175084_36175284	13.5955	5.03928	3.55191	2.47831	2.65759	4.55493	1.94485	3.62869	2.56036	4.6078	4.58326	0.932354	3.69261	5.86636	2.55156	4.93457	1.22828	3.53548	1.08382	3.04957	0	3.38333	2.79788	6.71192	2.05382	5.53736	3.98995	4.32204	4.43495	1.97391	2.48839	5.18003	0	1.62618	7.39552	3.5072
chr11_36974868_36975068	1.13295	2.01571	5.32787	0	4.42931	4.55493	1.94485	1.81435	3.41382	1.84312	1.8333	1.86471	1.23087	5.86636	1.70104	2.96074	6.14139	0.883869	3.25146	4.0661	3.32363	2.5375	4.66314	1.91769	2.05382	4.42989	11.9699	4.32204	2.66097	2.96087	4.14732	2.96002	4.20567	4.87855	4.6222	3.5072
chr11_40131528_40131728	5.66477	3.02357	0.887978	2.47831	3.54345	4.55493	1.94485	9.07174	5.12073	1.84312	5.49991	3.72942	0	1.95545	13.6083	2.96074	6.14139	1.76774	1.08382	3.04957	2.21575	0.845832	7.46102	1.91769	3.08074	3.32242	5.98493	3.45763	2.66097	5.92174	4.97678	2.22001	4.20567	3.25237	3.69776	2.33813
chr11_41612454_41612654	6.79773	6.04714	2.66393	2.47831	2.65759	1.82197	1.94485	5.44304	3.41382	4.6078	3.66661	4.66177	3.69261	3.91091	11.9073	1.97383	3.68483	2.65161	2.16764	6.09915	1.10788	3.38333	2.79788	4.79423	1.02691	1.10747	1.99498	2.59323	1.77398	0.986956	6.6357	3.70002	5.04681	2.43928	4.6222	2.33813
chr11_46252085_46252290	6.79773	3.02357	3.55191	4.13051	4.42931	3.64395	1.94485	5.44304	7.68109	1.84312	7.33321	1.86471	4.92348	5.86636	5.10312	2.96074	1.22828	2.65161	1.08382	1.01652	5.53938	5.07499	7.46102	0.958846	3.08074	3.32242	13.9648	9.50849	4.43495	4.93478	6.6357	2.22001	4.20567	2.43928	5.54664	3.5072
chr11_48475651_48475955	6.79773	2.01571	5.32787	6.60881	5.31517	3.64395	6.80699	2.72152	4.26727	3.68624	4.58326	2.79706	0	5.86636	5.95364	1.97383	7.36966	7.95482	6.50292	4.0661	4.43151	4.22916	4.66314	6.71192	5.13456	2.21494	14.9623	5.18645	7.9829	7.89565	4.14732	4.44003	9.25248	6.50474	5.54664	1.16907
chr11_59052309_59052509	7.93068	4.03143	3.55191	4.13051	9.74449	13.6648	2.91728	2.72152	2.56036	2.76468	5.49991	4.66177	4.92348	1.95545	5.10312	3.94766	7.36966	6.18708	1.08382	1.01652	8.86302	6.76666	2.79788	10.5473	6.16147	5.53736	2.99247	4.32204	4.43495	3.94782	6.6357	2.96002	1.68227	0.813092	4.6222	5.84534
chr11_61786939_61787139	4.53182	7.055	3.55191	4.13051	5.31517	2.73296	2.91728	1.81435	4.26727	3.68624	4.58326	3.72942	0	0.977727	2.55156	1.97383	1.22828	6.18708	4.33528	3.04957	2.21575	3.38333	2.79788	4.79423	3.08074	2.21494	3.98995	0.864408	3.54796	5.92174	3.31785	1.48001	2.5234	1.62618	6.47108	14.0288
chr11_62130422_62130622	4.53182	4.03143	5.32787	3.30441	5.31517	5.46592	1.94485	7.25739	10.2415	2.76468	5.49991	3.72942	4.92348	1.95545	5.10312	5.92149	3.68483	1.76774	5.4191	3.04957	3.32363	5.07499	2.79788	2.87654	5.13456	7.75231	5.98493	3.45763	7.09591	1.97391	4.14732	5.92004	5.88794	5.69165	3.69776	2.33813
chr11_62494856_62495088	9.06364	6.04714	6.21585	14.8698	13.2879	10.0209	3.88971	9.97891	5.97418	8.29404	7.33321	4.66177	7.38523	4.88863	8.5052	7.89532	4.91311	5.30321	9.75439	8.1322	3.32363	4.22916	5.59577	7.67077	8.2153	8.85978	7.97991	6.05086	1.77398	6.90869	4.14732	11.8401	5.04681	5.69165	12.9422	7.0144
chr11_63894552_63894752	4.53182	6.04714	0.887978	6.60881	1.77172	10.9318	1.94485	1.81435	2.56036	5.52936	2.74995	3.72942	6.15435	2.93318	2.55156	1.97383	4.91311	4.41934	1.08382	3.04957	2.21575	3.38333	8.39365	2.87654	6.16147	3.32242	4.98744	0	2.66097	6.90869	1.65893	6.66004	5.88794	4.87855	3.69776	2.33813
chr11_65341892_65342137	10.1966	6.04714	4.43989	7.43492	8.85862	6.37691	9.72427	5.44304	5.12073	7.37248	8.24986	3.72942	22.1557	3.91091	5.10312	5.92149	4.91311	4.41934	7.58674	7.11567	3.32363	8.45832	5.59577	4.79423	7.18839	13.2897	1.99498	8.64408	7.9829	4.93478	7.46517	8.14005	10.0936	7.31783	4.6222	7.0144
chr11_65625801_65626001	4.53182	8.06285	9.76776	5.78271	9.74449	4.55493	8.75184	4.53587	5.97418	3.68624	6.41656	9.32354	9.84697	5.86636	10.2062	4.93457	6.14139	2.65161	2.16764	8.1322	3.32363	4.22916	3.73051	3.83538	4.10765	7.75231	13.9648	5.18645	5.32194	5.92174	4.97678	9.62006	3.36454	7.31783	6.47108	4.67627
chr11_65657918_65658118	5.66477	3.02357	7.10383	7.43492	6.20104	11.8428	7.77942	2.72152	6.82764	1.84312	8.24986	1.86471	7.38523	11.7327	1.70104	7.89532	7.36966	1.76774	4.33528	2.03305	4.43151	8.45832	5.59577	2.87654	5.13456	6.64483	4.98744	2.59323	7.9829	5.92174	4.97678	2.96002	8.41135	4.06546	5.54664	4.67627
chr11_65844192_65844392	4.53182	4.03143	2.66393	3.30441	3.54345	13.6648	5.83456	5.44304	5.97418	2.76468	1.8333	4.66177	7.38523	3.91091	2.55156	1.97383	1.22828	7.07095	6.50292	4.0661	3.32363	7.61249	0	2.87654	5.13456	3.32242	3.98995	3.45763	4.43495	2.96087	2.48839	5.92004	5.04681	4.87855	6.47108	1.16907
chr11_66623897_66624097	5.66477	6.04714	6.21585	6.60881	6.20104	6.37691	3.88971	6.35022	11.9484	1.84312	7.33321	3.72942	9.84697	7.82182	6.80416	1.97383	3.68483	6.18708	5.4191	6.09915	2.21575	3.38333	3.73051	4.79423	8.2153	6.64483	4.98744	7.77968	2.66097	5.92174	4.14732	6.66004	6.72908	4.06546	4.6222	9.35254
chr11_66666281_66666481	4.53182	4.03143	7.9918	3.30441	5.31517	3.64395	3.88971	0.907174	2.56036	3.68624	1.8333	1.86471	9.84697	2.93318	3.40208	5.92149	4.91311	3.53548	14.0897	3.04957	4.43151	4.22916	0.932628	2.87654	4.10765	0	4.98744	4.32204	2.66097	1.97391	4.14732	5.92004	2.5234	2.43928	4.6222	0
chr11_67420656_67420856	3.39886	6.04714	3.55191	3.30441	4.42931	0	4.86213	1.81435	3.41382	6.45092	0.916652	4.66177	2.46174	0.977727	5.10312	2.96074	3.68483	7.95482	4.33528	7.11567	14.4024	6.76666	1.86526	5.75308	4.10765	4.42989	1.99498	3.45763	3.54796	3.94782	4.14732	1.48001	2.5234	2.43928	3.69776	5.84534
chr11_67653332_67653603	3.39886	5.03928	4.43989	7.43492	6.20104	3.64395	3.88971	2.72152	4.26727	2.76468	3.66661	1.86471	2.46174	6.84409	3.40208	0.986915	6.14139	6.18708	14.0897	2.03305	2.21575	8.45832	1.86526	1.91769	3.08074	3.32242	0.997489	2.59323	3.54796	2.96087	8.29463	2.22001	2.5234	8.94402	2.77332	2.33813
chr11_67779460_67779660	7.93068	4.03143	1.77596	6.60881	2.65759	13.6648	2.91728	2.72152	5.97418	3.68624	0.916652	5.59413	2.46174	3.91091	3.40208	2.96074	3.68483	2.65161	6.50292	2.03305	2.21575	5.92083	1.86526	2.87654	3.08074	5.53736	3.98995	2.59323	7.09591	4.93478	1.65893	8.88006	4.20567	5.69165	3.69776	1.16907
chr11_67919854_67920146	19.2602	4.03143	5.32787	7.43492	6.20104	1.82197	4.86213	0	0.853455	2.76468	5.49991	8.39119	3.69261	6.84409	2.55156	0.986915	6.14139	3.53548	3.25146	8.1322	3.32363	4.22916	1.86526	7.67077	5.13456	3.32242	3.98995	6.05086	7.09591	4.93478	4.97678	2.22001	5.88794	4.87855	2.77332	5.84534
chr11_68287475_68287675	7.93068	6.04714	3.55191	3.30441	4.42931	2.73296	12.6415	3.62869	6.82764	4.6078	4.58326	6.52648	1.23087	2.93318	5.95364	6.9084	3.68483	1.76774	6.50292	2.03305	4.43151	3.38333	2.79788	6.71192	4.10765	1.10747	1.99498	2.59323	3.54796	3.94782	3.31785	2.22001	5.04681	2.43928	2.77332	2.33813
chr11_68446701_68446901	2.26591	7.055	1.77596	3.30441	4.42931	0.910987	10.6967	6.35022	2.56036	3.68624	3.66661	3.72942	2.46174	2.93318	2.55156	2.96074	4.91311	0.883869	3.25146	4.0661	4.43151	5.92083	2.79788	1.91769	7.18839	2.21494	1.99498	4.32204	2.66097	3.94782	3.31785	0.740005	3.36454	1.62618	3.69776	4.67627
chr11_68632424_68632632	0	3.02357	1.77596	1.6522	2.65759	2.73296	1.94485	1.81435	6.82764	1.84312	4.58326	1.86471	18.4631	4.88863	6.80416	3.94766	1.22828	5.30321	3.25146	3.04957	2.21575	5.07499	4.66314	2.87654	2.05382	2.21494	4.98744	3.45763	2.66097	4.93478	1.65893	2.22001	5.88794	0	0.92444	1.16907
chr11_69319436_69319636	2.26591	2.01571	4.43989	2.47831	1.77172	2.73296	4.86213	0.907174	3.41382	2.76468	3.66661	4.66177	4.92348	1.95545	1.70104	4.93457	1.22828	7.95482	5.4191	4.0661	6.64726	0.845832	4.66314	3.83538	4.10765	4.42989	0	2.59323	3.54796	5.92174	2.48839	2.96002	5.04681	4.87855	3.69776	15.1979
chr11_71433851_71434051	9.06364	7.055	0	0	2.65759	9.10987	10.6967	4.53587	3.41382	4.6078	6.41656	2.79706	2.46174	1.95545	3.40208	3.94766	9.82622	2.65161	4.33528	4.0661	5.53938	6.76666	2.79788	3.83538	3.08074	4.42989	5.98493	6.91527	2.66097	4.93478	5.80624	4.44003	5.88794	7.31783	5.54664	5.84534
chr11_71781354_71781554	4.53182	5.03928	4.43989	4.95661	2.65759	1.82197	1.94485	9.07174	2.56036	5.52936	4.58326	0.932354	3.69261	3.91091	11.9073	4.93457	3.68483	3.53548	4.33528	3.04957	5.53938	1.69166	3.73051	2.87654	5.13456	1.10747	2.99247	3.45763	2.66097	4.93478	4.14732	3.70002	3.36454	3.25237	5.54664	5.84534
chr11_72122399_72122672	2.26591	6.04714	7.9918	2.47831	2.65759	3.64395	4.86213	3.62869	3.41382	3.68624	5.49991	3.72942	3.69261	7.82182	1.70104	5.92149	1.22828	7.07095	3.25146	4.0661	6.64726	7.61249	5.59577	7.67077	3.08074	6.64483	13.9648	6.91527	2.66097	0	14.1009	3.70002	1.68227	8.13092	3.69776	5.84534
chr11_72425989_72426189	4.53182	2.01571	5.32787	1.6522	3.54345	5.46592	1.94485	1.81435	5.12073	1.84312	1.8333	5.59413	3.69261	3.91091	2.55156	7.89532	2.45655	5.30321	4.33528	3.04957	3.32363	2.5375	4.66314	1.91769	2.05382	0	3.98995	5.18645	5.32194	4.93478	1.65893	14.8001	2.5234	3.25237	1.84888	5.84534
chr11_72612568_72612768	3.39886	1.00786	12.4317	1.6522	2.65759	1.82197	4.86213	2.72152	3.41382	3.68624	1.8333	1.86471	7.38523	3.91091	2.55156	1.97383	9.82622	7.07095	4.33528	2.03305	4.43151	3.38333	2.79788	4.79423	1.02691	2.21494	5.98493	7.77968	5.32194	7.89565	3.31785	2.96002	3.36454	2.43928	4.6222	5.84534
chr11_73087262_73087562	6.79773	7.055	10.6557	7.43492	3.54345	9.10987	8.75184	9.07174	10.2415	4.6078	12.8331	6.52648	22.1557	9.77727	6.80416	5.92149	4.91311	5.30321	3.25146	8.1322	5.53938	10.15	8.39365	5.75308	4.10765	7.75231	1.99498	4.32204	7.9829	5.92174	6.6357	6.66004	3.36454	4.87855	4.6222	11.6907
chr11_73639594_73639810	6.79773	8.06285	10.6557	1.6522	5.31517	4.55493	0.972427	3.62869	5.12073	5.52936	2.74995	4.66177	1.23087	2.93318	5.10312	3.94766	1.22828	4.41934	15.1735	5.08262	2.21575	4.22916	3.73051	5.75308	5.13456	5.53736	4.98744	2.59323	3.54796	3.94782	4.97678	3.70002	0.841135	3.25237	1.84888	4.67627
chr11_73703476_73703676	5.66477	4.03143	2.66393	4.13051	1.77172	0.910987	2.91728	2.72152	3.41382	3.68624	5.49991	1.86471	7.38523	5.86636	7.65468	0.986915	4.91311	14.1419	6.50292	2.03305	7.75514	1.69166	0.932628	2.87654	0	5.53736	0.997489	7.77968	3.54796	5.92174	2.48839	3.70002	4.20567	3.25237	5.54664	3.5072
chr11_74145210_74145410	12.4625	8.06285	17.7596	9.08712	12.4021	8.19888	7.77942	7.25739	11.0949	11.9803	9.16652	16.7824	12.3087	11.7327	11.0568	9.86915	6.14139	13.258	7.58674	19.314	13.2945	15.225	9.32628	7.67077	13.3499	23.2569	10.9724	15.5594	7.09591	5.92174	11.6125	14.8001	12.617	8.94402	9.2444	11.6907
chr11_74317720_74317920	4.53182	3.02357	2.66393	4.13051	3.54345	2.73296	3.88971	3.62869	12.8018	4.6078	2.74995	4.66177	1.23087	3.91091	5.10312	4.93457	2.45655	2.65161	3.25146	3.04957	9.97089	2.5375	5.59577	3.83538	0	0	3.98995	4.32204	6.20893	4.93478	1.65893	4.44003	0.841135	8.94402	7.39552	8.18347
chr11_75926329_75926529	2.26591	9.07071	4.43989	3.30441	6.20104	6.37691	11.6691	0.907174	2.56036	2.76468	3.66661	4.66177	2.46174	5.86636	5.95364	3.94766	1.22828	4.41934	6.50292	10.1652	5.53938	5.92083	0	5.75308	5.13456	1.10747	1.99498	2.59323	2.66097	1.97391	4.14732	2.96002	3.36454	7.31783	3.69776	2.33813
chr11_77185339_77185539	7.93068	4.03143	3.55191	4.95661	4.42931	2.73296	12.6415	4.53587	6.82764	3.68624	4.58326	4.66177	6.15435	4.88863	8.5052	6.9084	7.36966	4.41934	2.16764	10.1652	3.32363	7.61249	6.5284	5.75308	5.13456	6.64483	4.98744	7.77968	3.54796	8.88261	4.14732	6.66004	4.20567	2.43928	4.6222	4.67627
chr11_77617755_77617955	1.13295	5.03928	6.21585	7.43492	4.42931	2.73296	4.86213	5.44304	2.56036	2.76468	3.66661	1.86471	4.92348	7.82182	11.9073	5.92149	7.36966	3.53548	3.25146	1.01652	4.43151	5.92083	1.86526	2.87654	1.02691	3.32242	6.98242	0	2.66097	2.96087	0	2.22001	3.36454	5.69165	0.92444	7.0144
chr11_80389462_80389794	2.26591	4.03143	2.66393	3.30441	7.97276	5.46592	0.972427	7.25739	16.2156	9.2156	9.16652	3.72942	6.15435	1.95545	0.85052	9.86915	12.2828	3.53548	3.25146	5.08262	5.53938	8.45832	4.66314	0.958846	9.24221	8.85978	2.99247	0.864408	2.66097	0.986956	9.12409	3.70002	5.88794	6.50474	2.77332	2.33813
chr11_80476379_80476590	2.26591	7.055	4.43989	5.78271	7.97276	2.73296	2.91728	1.81435	2.56036	3.68624	1.8333	5.59413	1.23087	1.95545	5.10312	4.93457	3.68483	3.53548	3.25146	1.01652	4.43151	3.38333	3.73051	0.958846	4.10765	3.32242	1.99498	1.72882	2.66097	4.93478	1.65893	3.70002	1.68227	4.87855	1.84888	15.1979
chr11_81284911_81285111	2.26591	3.02357	1.77596	2.47831	1.77172	3.64395	5.83456	2.72152	3.41382	4.6078	3.66661	4.66177	1.23087	6.84409	1.70104	1.97383	7.36966	2.65161	2.16764	4.0661	7.75514	5.92083	4.66314	2.87654	3.08074	1.10747	12.9674	0.864408	2.66097	3.94782	3.31785	1.48001	2.5234	4.06546	1.84888	5.84534
chr11_84451460_84451660	1.13295	1.00786	2.66393	1.6522	0.885862	1.82197	0.972427	3.62869	2.56036	2.76468	0.916652	2.79706	4.92348	2.93318	3.40208	2.96074	2.45655	2.65161	4.33528	4.0661	1.10788	6.76666	2.79788	0.958846	12.3229	5.53736	1.99498	3.45763	3.54796	3.94782	2.48839	2.96002	5.04681	3.25237	3.69776	8.18347
chr11_85917460_85917682	2.26591	4.03143	4.43989	1.6522	4.42931	14.5758	1.94485	2.72152	3.41382	1.84312	1.8333	2.79706	2.46174	3.91091	5.10312	4.93457	2.45655	3.53548	3.25146	2.03305	5.53938	6.76666	4.66314	1.91769	2.05382	3.32242	5.98493	5.18645	0.886989	7.89565	2.48839	3.70002	2.5234	5.69165	3.69776	3.5072
chr11_86075263_86075518	6.79773	4.03143	2.66393	4.13051	3.54345	4.55493	1.94485	0.907174	12.8018	3.68624	3.66661	3.72942	7.38523	3.91091	5.95364	5.92149	2.45655	4.41934	4.33528	3.04957	2.21575	3.38333	3.73051	5.75308	4.10765	3.32242	4.98744	2.59323	6.20893	2.96087	2.48839	1.48001	5.04681	3.25237	8.31996	2.33813
chr11_86400602_86400802	4.53182	2.01571	2.66393	4.95661	5.31517	3.64395	4.86213	4.53587	2.56036	6.45092	3.66661	13.9853	2.46174	0.977727	3.40208	4.93457	3.68483	4.41934	6.50292	3.04957	2.21575	1.69166	3.73051	3.83538	2.05382	6.64483	0.997489	3.45763	2.66097	1.97391	1.65893	1.48001	5.88794	4.06546	4.6222	1.16907
chr11_92438592_92439046	16.9943	10.0786	6.21585	11.5654	8.85862	4.55493	10.6967	9.07174	7.68109	13.8234	10.9998	12.1206	8.6161	7.82182	9.35572	9.86915	19.6524	11.4903	6.50292	12.1983	6.64726	6.76666	10.2589	7.67077	10.2691	5.53736	10.9724	6.91527	10.6439	15.7913	4.14732	10.3601	9.25248	13.0095	11.0933	9.35254
chr11_96953838_96954038	9.06364	16.1257	12.4317	19.0003	18.6031	9.10987	13.614	11.7933	15.3622	11.9803	11.9165	9.32354	8.6161	14.6659	14.4588	10.8561	11.0545	7.07095	11.922	14.2313	11.0788	13.5333	14.922	17.2592	13.3499	13.2897	12.9674	15.5594	10.6439	18.7522	10.783	13.3201	16.8227	13.8226	18.4888	12.8597
chr11_101529426_101529638	4.53182	1.00786	2.66393	4.95661	4.42931	4.55493	3.88971	6.35022	1.70691	5.52936	2.74995	4.66177	7.38523	2.93318	5.10312	2.96074	7.36966	2.65161	5.4191	6.09915	3.32363	4.22916	4.66314	1.91769	5.13456	1.10747	3.98995	2.59323	2.66097	4.93478	4.14732	3.70002	14.2993	4.87855	4.6222	1.16907
chr11_104474580_104474780	6.79773	3.02357	5.32787	4.95661	2.65759	1.82197	3.88971	3.62869	3.41382	3.68624	2.74995	1.86471	7.38523	1.95545	6.80416	1.97383	4.91311	6.18708	3.25146	1.01652	13.2945	6.76666	2.79788	2.87654	7.18839	3.32242	1.99498	3.45763	4.43495	2.96087	2.48839	2.96002	2.5234	3.25237	6.47108	4.67627
chr11_105088657_105088857	3.39886	4.03143	2.66393	3.30441	3.54345	3.64395	2.91728	4.53587	2.56036	1.84312	2.74995	1.86471	8.6161	3.91091	4.2526	2.96074	0	4.41934	5.4191	0	3.32363	2.5375	3.73051	2.87654	4.10765	4.42989	3.98995	6.05086	3.54796	13.8174	8.29463	2.96002	3.36454	2.43928	2.77332	1.16907
chr11_107407291_107407491	13.5955	5.03928	8.87978	4.13051	5.31517	5.46592	2.91728	1.81435	4.26727	2.76468	4.58326	2.79706	3.69261	1.95545	1.70104	4.93457	4.91311	2.65161	2.16764	1.01652	4.43151	1.69166	4.66314	6.71192	2.05382	3.32242	3.98995	6.91527	4.43495	0.986956	4.97678	2.96002	5.04681	3.25237	6.47108	1.16907
chr11_107708836_107709053	3.39886	2.01571	3.55191	3.30441	4.42931	0.910987	1.94485	3.62869	3.41382	2.76468	2.74995	6.52648	4.92348	2.93318	4.2526	6.9084	3.68483	1.76774	4.33528	4.0661	2.21575	5.07499	5.59577	4.79423	0	15.5046	3.98995	4.32204	1.77398	3.94782	5.80624	3.70002	1.68227	1.62618	5.54664	8.18347
chr11_107714711_107714911	13.5955	1.00786	4.43989	1.6522	2.65759	5.46592	1.94485	4.53587	2.56036	3.68624	3.66661	5.59413	0	4.88863	1.70104	3.94766	1.22828	1.76774	3.25146	2.03305	2.21575	5.07499	2.79788	2.87654	5.13456	0	0.997489	4.32204	4.43495	3.94782	4.14732	3.70002	4.20567	2.43928	5.54664	1.16907
chr11_108990289_108990489	6.79773	3.02357	2.66393	1.6522	2.65759	1.82197	11.6691	3.62869	2.56036	6.45092	3.66661	4.66177	2.46174	8.79954	5.10312	5.92149	6.14139	2.65161	4.33528	4.0661	3.32363	0	4.66314	6.71192	3.08074	2.21494	3.98995	3.45763	6.20893	2.96087	4.14732	1.48001	3.36454	0.813092	1.84888	1.16907
chr11_110223714_110223914	3.39886	1.00786	2.66393	2.47831	2.65759	3.64395	4.86213	4.53587	4.26727	0.92156	1.8333	1.86471	1.23087	2.93318	12.7578	4.93457	8.59794	0.883869	2.16764	2.03305	4.43151	0.845832	3.73051	3.83538	3.08074	5.53736	2.99247	5.18645	3.54796	0.986956	5.80624	3.70002	4.20567	4.87855	4.6222	4.67627
chr11_110521958_110522186	3.39886	4.03143	7.9918	1.6522	5.31517	3.64395	4.86213	1.81435	3.41382	2.76468	0.916652	2.79706	1.23087	3.91091	4.2526	0.986915	3.68483	8.83869	14.0897	3.04957	1.10788	5.07499	7.46102	4.79423	5.13456	4.42989	5.98493	5.18645	6.20893	2.96087	4.97678	5.92004	2.5234	3.25237	1.84888	1.16907
chr11_110581005_110581205	4.53182	3.02357	2.66393	1.6522	4.42931	1.82197	1.94485	0.907174	4.26727	1.84312	5.49991	3.72942	1.23087	2.93318	2.55156	4.93457	2.45655	5.30321	2.16764	1.01652	2.21575	0	2.79788	3.83538	9.24221	0	0	6.91527	1.77398	2.96087	0	6.66004	2.5234	2.43928	2.77332	3.5072
chr11_110863633_110863836	4.53182	3.02357	1.77596	2.47831	0.885862	1.82197	0.972427	2.72152	13.6553	4.6078	2.74995	0.932354	3.69261	1.95545	3.40208	7.89532	3.68483	1.76774	2.16764	7.11567	3.32363	5.07499	5.59577	2.87654	3.08074	4.42989	0	2.59323	5.32194	2.96087	3.31785	2.22001	2.5234	4.87855	3.69776	3.5072
chr11_111871750_111871950	4.53182	7.055	5.32787	3.30441	2.65759	5.46592	1.94485	2.72152	10.2415	1.84312	2.74995	4.66177	1.23087	2.93318	1.70104	3.94766	2.45655	3.53548	3.25146	3.04957	6.64726	6.76666	4.66314	3.83538	5.13456	2.21494	4.98744	6.91527	0.886989	0	4.14732	1.48001	2.5234	0.813092	1.84888	2.33813
chr11_112286963_112287163	3.39886	3.02357	3.55191	3.30441	4.42931	1.82197	1.94485	3.62869	11.9484	6.45092	1.8333	3.72942	1.23087	1.95545	3.40208	7.89532	6.14139	4.41934	1.08382	1.01652	3.32363	4.22916	2.79788	3.83538	3.08074	3.32242	2.99247	5.18645	2.66097	2.96087	0.829463	4.44003	4.20567	4.87855	4.6222	2.33813
chr11_112776887_112777087	4.53182	1.00786	2.66393	3.30441	7.0869	1.82197	3.88971	3.62869	4.26727	3.68624	3.66661	2.79706	1.23087	3.91091	2.55156	1.97383	4.91311	3.53548	4.33528	3.04957	13.2945	4.22916	3.73051	4.79423	3.08074	2.21494	0.997489	1.72882	2.66097	3.94782	1.65893	2.22001	1.68227	7.31783	1.84888	1.16907
chr11_113898888_113899110	0	7.055	3.55191	5.78271	4.42931	4.55493	1.94485	2.72152	4.26727	4.6078	6.41656	2.79706	2.46174	3.91091	0.85052	7.89532	3.68483	5.30321	2.16764	2.03305	4.43151	2.5375	3.73051	4.79423	3.08074	15.5046	0	5.18645	2.66097	1.97391	4.97678	3.70002	3.36454	4.87855	4.6222	2.33813
chr11_114711224_114711424	1.13295	0	0.887978	1.6522	0	0.910987	0	0	0.853455	0.92156	0.916652	0	0	0	0	0	0	0.883869	0	0	0	0	0	0	0	1.10747	0	0	0	0	0	0.740005	2.5234	0	0.92444	0
chr11_117262008_117262208	3.39886	3.02357	2.66393	2.47831	4.42931	0.910987	1.94485	5.44304	2.56036	0.92156	0.916652	13.053	3.69261	3.91091	4.2526	3.94766	1.22828	1.76774	1.08382	5.08262	2.21575	2.5375	1.86526	0.958846	9.24221	3.32242	2.99247	4.32204	2.66097	1.97391	2.48839	2.96002	4.20567	5.69165	0	1.16907
chr11_117330718_117330990	4.53182	4.03143	4.43989	9.08712	6.20104	3.64395	3.88971	12.7004	4.26727	5.52936	3.66661	2.79706	2.46174	4.88863	4.2526	1.97383	7.36966	8.83869	5.4191	5.08262	3.32363	5.92083	6.5284	4.79423	0	3.32242	15.9598	5.18645	6.20893	2.96087	5.80624	3.70002	3.36454	6.50474	3.69776	3.5072
chr11_117626282_117626482	4.53182	3.02357	1.77596	3.30441	4.42931	4.55493	0.972427	1.81435	2.56036	2.76468	0.916652	1.86471	3.69261	2.93318	4.2526	3.94766	3.68483	4.41934	3.25146	2.03305	2.21575	2.5375	0.932628	1.91769	6.16147	3.32242	0.997489	4.32204	4.43495	12.8304	0.829463	2.22001	5.04681	1.62618	3.69776	4.67627
chr11_118000803_118001003	5.66477	4.03143	3.55191	4.13051	6.20104	5.46592	3.88971	3.62869	11.0949	6.45092	1.8333	1.86471	4.92348	2.93318	6.80416	1.97383	1.22828	7.95482	0	6.09915	6.64726	1.69166	1.86526	2.87654	4.10765	4.42989	3.98995	3.45763	4.43495	1.97391	4.14732	2.22001	5.04681	4.87855	2.77332	3.5072
chr11_118938216_118938416	10.1966	7.055	3.55191	4.13051	2.65759	6.37691	3.88971	6.35022	14.5087	7.37248	7.33321	8.39119	8.6161	7.82182	2.55156	6.9084	8.59794	7.07095	4.33528	5.08262	4.43151	6.76666	3.73051	3.83538	3.08074	2.21494	0.997489	4.32204	5.32194	6.90869	8.29463	8.88006	5.04681	4.06546	8.31996	3.5072
chr11_120193011_120193211	3.39886	3.02357	3.55191	5.78271	2.65759	2.73296	2.91728	1.81435	5.12073	1.84312	4.58326	0.932354	4.92348	2.93318	4.2526	5.92149	2.45655	4.41934	2.16764	4.0661	1.10788	1.69166	4.66314	3.83538	1.02691	2.21494	2.99247	6.05086	4.43495	9.86956	2.48839	2.22001	5.04681	4.06546	1.84888	14.0288
chr11_124452971_124453191	3.39886	5.03928	3.55191	4.95661	3.54345	0.910987	5.83456	4.53587	5.12073	6.45092	3.66661	3.72942	2.46174	4.88863	3.40208	4.93457	2.45655	3.53548	2.16764	4.0661	2.21575	1.69166	3.73051	1.91769	14.3768	1.10747	0.997489	1.72882	1.77398	2.96087	4.97678	2.22001	4.20567	1.62618	2.77332	3.5072
chr11_124887209_124887409	2.26591	0	3.55191	2.47831	4.42931	5.46592	2.91728	3.62869	5.97418	1.84312	1.8333	1.86471	1.23087	4.88863	5.95364	5.92149	2.45655	4.41934	3.25146	4.0661	14.4024	2.5375	3.73051	1.91769	3.08074	5.53736	4.98744	4.32204	2.66097	4.93478	5.80624	3.70002	5.04681	4.06546	0.92444	0
chr11_127625125_127625325	2.26591	1.00786	5.32787	1.6522	3.54345	4.55493	3.88971	1.81435	10.2415	4.6078	5.49991	0.932354	3.69261	3.91091	3.40208	2.96074	2.45655	2.65161	2.16764	1.01652	2.21575	5.07499	4.66314	3.83538	3.08074	5.53736	0.997489	4.32204	2.66097	0	2.48839	2.96002	4.20567	0.813092	3.69776	2.33813
chr11_128012848_128013048	1.13295	1.00786	5.32787	1.6522	2.65759	1.82197	0.972427	1.81435	2.56036	0.92156	1.8333	1.86471	2.46174	1.95545	2.55156	0	3.68483	0.883869	0	3.04957	2.21575	1.69166	2.79788	1.91769	1.02691	1.10747	2.99247	1.72882	1.77398	0	0.829463	2.22001	0	0	3.69776	2.33813
chr11_129249090_129249290	4.53182	3.02357	3.55191	1.6522	4.42931	4.55493	12.6415	1.81435	4.26727	0.92156	3.66661	3.72942	7.38523	2.93318	3.40208	5.92149	3.68483	4.41934	1.08382	6.09915	3.32363	3.38333	5.59577	0.958846	5.13456	4.42989	0.997489	2.59323	2.66097	2.96087	2.48839	3.70002	3.36454	4.87855	3.69776	1.16907
chr11_133033711_133033927	14.7284	3.02357	3.55191	4.95661	4.42931	3.64395	3.88971	1.81435	4.26727	0.92156	5.49991	5.59413	2.46174	3.91091	3.40208	3.94766	2.45655	6.18708	3.25146	7.11567	2.21575	2.5375	0.932628	1.91769	2.05382	2.21494	1.99498	4.32204	1.77398	2.96087	0.829463	3.70002	1.68227	5.69165	5.54664	2.33813
chr11_134893102_134893302	2.26591	2.01571	4.43989	8.26102	0.885862	0.910987	0	0.907174	5.97418	2.76468	1.8333	2.79706	4.92348	4.88863	7.65468	2.96074	6.14139	2.65161	3.25146	4.0661	2.21575	3.38333	1.86526	4.79423	0	2.21494	11.9699	1.72882	4.43495	2.96087	2.48839	2.22001	3.36454	2.43928	1.84888	2.33813
chr12_95328_95665	7.93068	4.03143	8.87978	4.95661	3.54345	6.37691	7.77942	7.25739	5.97418	13.8234	6.41656	5.59413	1.23087	11.7327	8.5052	6.9084	9.82622	6.18708	8.67057	8.1322	4.43151	5.92083	10.2589	4.79423	7.18839	5.53736	4.98744	4.32204	9.75688	4.93478	7.46517	6.66004	8.41135	14.6357	10.1688	11.6907
chr12_147033_147320	7.93068	12.0943	7.9918	10.7393	9.74449	6.37691	7.77942	4.53587	4.26727	4.6078	9.16652	16.7824	11.0778	8.79954	8.5052	4.93457	6.14139	10.6064	15.1735	10.1652	5.53938	10.9958	13.0568	7.67077	8.2153	5.53736	6.98242	6.91527	12.4179	12.8304	9.95356	10.3601	8.41135	8.94402	7.39552	11.6907
chr12_628861_629111	5.66477	7.055	2.66393	5.78271	7.0869	3.64395	3.88971	6.35022	3.41382	1.84312	3.66661	4.66177	3.69261	0.977727	3.40208	2.96074	4.91311	6.18708	4.33528	5.08262	17.726	2.5375	3.73051	4.79423	4.10765	4.42989	2.99247	6.91527	3.54796	2.96087	3.31785	2.96002	0.841135	1.62618	3.69776	4.67627
chr12_993058_993376	2.26591	4.03143	2.66393	5.78271	1.77172	5.46592	6.80699	1.81435	15.3622	3.68624	5.49991	3.72942	2.46174	7.82182	3.40208	6.9084	6.14139	2.65161	3.25146	5.08262	6.64726	2.5375	5.59577	4.79423	5.13456	2.21494	4.98744	6.91527	1.77398	7.89565	3.31785	5.18003	5.04681	2.43928	4.6222	3.5072
chr12_2384183_2384383	1.13295	3.02357	1.77596	7.43492	3.54345	0.910987	2.91728	3.62869	2.56036	2.76468	0.916652	2.79706	6.15435	2.93318	0.85052	0.986915	0	5.30321	1.08382	5.08262	2.21575	0.845832	7.46102	2.87654	7.18839	1.10747	2.99247	0.864408	6.20893	13.8174	3.31785	2.22001	2.5234	4.87855	5.54664	4.67627
chr12_2404038_2404238	1.13295	10.0786	6.21585	4.13051	5.31517	2.73296	3.88971	4.53587	5.12073	2.76468	4.58326	2.79706	1.23087	6.84409	5.10312	4.93457	2.45655	3.53548	5.4191	4.0661	4.43151	2.5375	4.66314	6.71192	7.18839	4.42989	12.9674	4.32204	5.32194	4.93478	2.48839	8.88006	1.68227	3.25237	4.6222	10.5216
chr12_2895542_2895742	3.39886	2.01571	4.43989	2.47831	3.54345	1.82197	1.94485	4.53587	12.8018	3.68624	5.49991	2.79706	1.23087	0.977727	2.55156	5.92149	2.45655	4.41934	4.33528	3.04957	2.21575	6.76666	4.66314	4.79423	0	1.10747	0.997489	7.77968	3.54796	4.93478	2.48839	2.22001	3.36454	0	2.77332	3.5072
chr12_4352962_4353162	5.66477	3.02357	1.77596	4.95661	5.31517	5.46592	5.83456	1.81435	2.56036	6.45092	2.74995	1.86471	11.0778	4.88863	6.80416	1.97383	6.14139	7.07095	11.922	1.01652	8.86302	4.22916	4.66314	2.87654	4.10765	3.32242	4.98744	3.45763	6.20893	1.97391	2.48839	5.18003	2.5234	2.43928	3.69776	7.0144
chr12_4911124_4911324	1.13295	1.00786	3.55191	3.30441	4.42931	5.46592	2.91728	5.44304	1.70691	4.6078	0.916652	3.72942	16.0013	5.86636	5.10312	0.986915	3.68483	4.41934	3.25146	4.0661	3.32363	2.5375	1.86526	1.91769	4.10765	2.21494	4.98744	4.32204	6.20893	2.96087	8.29463	3.70002	3.36454	1.62618	2.77332	2.33813
chr12_5429663_5429898	5.66477	4.03143	14.2077	5.78271	5.31517	8.19888	2.91728	1.81435	4.26727	4.6078	1.8333	3.72942	6.15435	6.84409	4.2526	5.92149	6.14139	3.53548	3.25146	4.0661	4.43151	4.22916	1.86526	1.91769	7.18839	7.75231	5.98493	2.59323	6.20893	3.94782	2.48839	5.92004	1.68227	4.87855	1.84888	10.5216
chr12_6772318_6772612	6.79773	7.055	5.32787	8.26102	5.31517	3.64395	11.6691	5.44304	21.3364	3.68624	5.49991	5.59413	7.38523	5.86636	2.55156	1.97383	7.36966	6.18708	8.67057	6.09915	7.75514	9.30416	7.46102	3.83538	9.24221	5.53736	5.98493	9.50849	2.66097	4.93478	8.29463	8.14005	4.20567	8.13092	5.54664	7.0144
chr12_6982420_6982623	4.53182	7.055	1.77596	9.91322	2.65759	4.55493	6.80699	7.25739	6.82764	5.52936	12.8331	6.52648	7.38523	4.88863	3.40208	6.9084	7.36966	1.76774	4.33528	7.11567	6.64726	6.76666	8.39365	5.75308	5.13456	8.85978	10.9724	9.50849	5.32194	5.92174	9.95356	5.18003	5.04681	4.06546	3.69776	12.8597
chr12_11105173_11105373	1.13295	3.02357	4.43989	4.13051	8.85862	4.55493	1.94485	3.62869	3.41382	4.6078	1.8333	1.86471	6.15435	3.91091	4.2526	1.97383	7.36966	2.65161	4.33528	1.01652	1.10788	3.38333	5.59577	1.91769	1.02691	5.53736	4.98744	0	2.66097	14.8043	2.48839	2.22001	4.20567	1.62618	1.84888	2.33813
chr12_11910418_11910618	3.39886	3.02357	6.21585	0.826102	4.42931	4.55493	2.91728	1.81435	1.70691	4.6078	5.49991	1.86471	3.69261	6.84409	4.2526	5.92149	4.91311	3.53548	15.1735	3.04957	4.43151	2.5375	6.5284	2.87654	5.13456	4.42989	7.97991	1.72882	2.66097	3.94782	5.80624	1.48001	2.5234	8.94402	0.92444	4.67627
chr12_12712202_12712402	4.53182	5.03928	1.77596	2.47831	1.77172	4.55493	5.83456	6.35022	2.56036	2.76468	1.8333	1.86471	2.46174	3.91091	7.65468	4.93457	6.14139	1.76774	5.4191	6.09915	2.21575	1.69166	2.79788	5.75308	4.10765	3.32242	3.98995	5.18645	3.54796	6.90869	3.31785	4.44003	13.4582	6.50474	4.6222	2.33813
chr12_14705302_14705502	1.13295	3.02357	5.32787	1.6522	3.54345	3.64395	9.72427	2.72152	3.41382	5.52936	5.49991	3.72942	12.3087	2.93318	1.70104	4.93457	7.36966	2.65161	14.0897	2.03305	3.32363	4.22916	4.66314	1.91769	3.08074	6.64483	0.997489	3.45763	1.77398	5.92174	1.65893	2.96002	3.36454	2.43928	7.39552	0
chr12_14908173_14908373	3.39886	5.03928	3.55191	5.78271	3.54345	1.82197	2.91728	2.72152	1.70691	2.76468	2.74995	1.86471	3.69261	0	3.40208	1.97383	2.45655	3.53548	1.08382	5.08262	2.21575	5.07499	1.86526	1.91769	3.08074	3.32242	11.9699	4.32204	5.32194	2.96087	3.31785	1.48001	2.5234	1.62618	3.69776	2.33813
chr12_15628719_15628963	4.53182	7.055	0.887978	5.78271	3.54345	3.64395	2.91728	2.72152	4.26727	3.68624	2.74995	0.932354	0	5.86636	1.70104	2.96074	3.68483	1.76774	2.16764	2.03305	2.21575	1.69166	3.73051	2.87654	16.4306	7.75231	2.99247	4.32204	3.54796	3.94782	0.829463	4.44003	5.04681	1.62618	2.77332	5.84534
chr12_18801768_18801968	3.39886	6.04714	3.55191	4.13051	4.42931	1.82197	3.88971	2.72152	2.56036	2.76468	4.58326	3.72942	0	4.88863	4.2526	2.96074	4.91311	6.18708	5.4191	0	11.0788	1.69166	5.59577	3.83538	2.05382	6.64483	1.99498	2.59323	7.09591	1.97391	4.14732	4.44003	2.5234	1.62618	4.6222	4.67627
chr12_19344054_19344259	4.53182	7.055	2.66393	4.95661	1.77172	2.73296	3.88971	7.25739	2.56036	6.45092	0.916652	3.72942	11.0778	2.93318	8.5052	0.986915	0	5.30321	4.33528	4.0661	4.43151	3.38333	3.73051	4.79423	13.3499	4.42989	0.997489	4.32204	3.54796	0.986956	1.65893	4.44003	1.68227	3.25237	3.69776	1.16907
chr12_19403083_19403283	13.5955	5.03928	1.77596	4.13051	1.77172	1.82197	1.94485	2.72152	3.41382	4.6078	6.41656	2.79706	4.92348	1.95545	2.55156	2.96074	2.45655	4.41934	4.33528	3.04957	1.10788	2.5375	0	4.79423	1.02691	0	6.98242	6.91527	4.43495	2.96087	0.829463	5.92004	7.57021	1.62618	4.6222	9.35254
chr12_20281957_20282157	13.5955	8.06285	4.43989	4.13051	0.885862	6.37691	5.83456	2.72152	5.97418	1.84312	3.66661	1.86471	6.15435	2.93318	0.85052	2.96074	3.68483	6.18708	8.67057	5.08262	5.53938	5.92083	5.59577	3.83538	2.05382	1.10747	3.98995	5.18645	0	1.97391	2.48839	3.70002	2.5234	2.43928	3.69776	4.67627
chr12_25234598_25234798	4.53182	5.03928	5.32787	1.6522	2.65759	4.55493	3.88971	5.44304	3.41382	1.84312	4.58326	1.86471	6.15435	4.88863	12.7578	3.94766	2.45655	4.41934	5.4191	5.08262	1.10788	3.38333	2.79788	2.87654	4.10765	4.42989	4.98744	1.72882	2.66097	2.96087	4.14732	7.40005	2.5234	3.25237	3.69776	3.5072
chr12_25778351_25778551	1.13295	4.03143	4.43989	4.95661	3.54345	2.73296	4.86213	2.72152	5.12073	1.84312	4.58326	2.79706	1.23087	1.95545	7.65468	3.94766	3.68483	4.41934	3.25146	3.04957	2.21575	3.38333	5.59577	4.79423	5.13456	3.32242	0.997489	5.18645	4.43495	5.92174	5.80624	2.22001	2.5234	2.43928	7.39552	15.1979
chr12_25870863_25871181	5.66477	4.03143	4.43989	1.6522	0	4.55493	1.94485	5.44304	4.26727	7.37248	0.916652	2.79706	2.46174	4.88863	4.2526	4.93457	7.36966	5.30321	6.50292	6.09915	5.53938	4.22916	6.5284	4.79423	5.13456	19.9345	11.9699	6.91527	5.32194	0.986956	4.14732	5.92004	7.57021	3.25237	4.6222	2.33813
chr12_26730483_26730683	1.13295	3.02357	6.21585	1.6522	5.31517	5.46592	6.80699	1.81435	4.26727	2.76468	1.8333	3.72942	2.46174	3.91091	6.80416	2.96074	4.91311	5.30321	1.08382	6.09915	2.21575	2.5375	3.73051	7.67077	9.24221	3.32242	9.97489	3.45763	3.54796	3.94782	3.31785	2.96002	6.72908	2.43928	3.69776	3.5072
chr12_27342985_27343185	4.53182	2.01571	5.32787	1.6522	1.77172	4.55493	2.91728	2.72152	1.70691	1.84312	2.74995	2.79706	2.46174	2.93318	3.40208	2.96074	2.45655	7.07095	4.33528	4.0661	3.32363	4.22916	0.932628	4.79423	6.16147	14.3971	3.98995	1.72882	1.77398	5.92174	3.31785	7.40005	2.5234	3.25237	4.6222	2.33813
chr12_27715022_27715222	2.26591	5.03928	1.77596	4.13051	4.42931	4.55493	7.77942	3.62869	5.12073	7.37248	3.66661	0.932354	3.69261	0	5.10312	5.92149	2.45655	5.30321	4.33528	5.08262	3.32363	3.38333	2.79788	5.75308	3.08074	4.42989	10.9724	5.18645	0.886989	4.93478	3.31785	5.18003	4.20567	3.25237	5.54664	3.5072
chr12_29592671_29592871	5.66477	2.01571	5.32787	4.13051	4.42931	0.910987	13.614	2.72152	6.82764	2.76468	4.58326	6.52648	0	5.86636	5.10312	3.94766	4.91311	2.65161	4.33528	1.01652	1.10788	1.69166	2.79788	6.71192	5.13456	4.42989	3.98995	4.32204	4.43495	2.96087	4.14732	4.44003	2.5234	2.43928	0.92444	4.67627
chr12_30636049_30636416	19.2602	6.04714	7.10383	2.47831	2.65759	3.64395	5.83456	9.07174	5.12073	8.29404	6.41656	10.2559	6.15435	1.95545	4.2526	4.93457	1.22828	8.83869	5.4191	3.04957	4.43151	5.92083	1.86526	4.79423	9.24221	4.42989	5.98493	8.64408	3.54796	6.90869	2.48839	7.40005	4.20567	7.31783	3.69776	8.18347
chr12_32470311_32470511	1.13295	3.02357	4.43989	0.826102	4.42931	1.82197	1.94485	5.44304	3.41382	3.68624	3.66661	5.59413	14.7705	5.86636	2.55156	1.97383	1.22828	3.53548	2.16764	1.01652	3.32363	5.92083	1.86526	2.87654	3.08074	1.10747	0.997489	4.32204	2.66097	1.97391	2.48839	0	0.841135	3.25237	4.6222	2.33813
chr12_39817966_39818166	0	4.03143	0.887978	2.47831	4.42931	1.82197	3.88971	1.81435	5.97418	1.84312	6.41656	6.52648	4.92348	2.93318	4.2526	2.96074	1.22828	2.65161	13.0058	3.04957	1.10788	1.69166	0.932628	4.79423	3.08074	3.32242	4.98744	4.32204	1.77398	4.93478	3.31785	2.22001	4.20567	5.69165	0.92444	0
chr12_40028519_40028719	11.3295	4.03143	2.66393	3.30441	4.42931	1.82197	2.91728	4.53587	1.70691	0.92156	0.916652	2.79706	3.69261	3.91091	8.5052	1.97383	8.59794	4.41934	11.922	6.09915	2.21575	5.07499	1.86526	2.87654	6.16147	4.42989	2.99247	1.72882	2.66097	2.96087	3.31785	4.44003	3.36454	2.43928	4.6222	3.5072
chr12_40549175_40549375	3.39886	3.02357	0.887978	4.95661	6.20104	5.46592	3.88971	1.81435	3.41382	3.68624	4.58326	1.86471	1.23087	0.977727	2.55156	3.94766	6.14139	6.18708	2.16764	9.14872	4.43151	4.22916	2.79788	4.79423	4.10765	4.42989	2.99247	2.59323	2.66097	0.986956	4.14732	5.18003	5.88794	6.50474	2.77332	16.3669
chr12_40553276_40553476	5.66477	2.01571	7.10383	5.78271	1.77172	4.55493	2.91728	4.53587	3.41382	1.84312	6.41656	2.79706	12.3087	2.93318	12.7578	4.93457	7.36966	2.65161	3.25146	7.11567	3.32363	4.22916	1.86526	3.83538	3.08074	4.42989	0.997489	4.32204	2.66097	3.94782	7.46517	2.96002	2.5234	0.813092	2.77332	8.18347
chr12_41139758_41139958	14.7284	2.01571	7.10383	4.95661	3.54345	0.910987	1.94485	4.53587	2.56036	2.76468	4.58326	2.79706	2.46174	5.86636	2.55156	2.96074	2.45655	5.30321	1.08382	7.11567	4.43151	2.5375	3.73051	3.83538	3.08074	2.21494	3.98995	1.72882	1.77398	4.93478	1.65893	4.44003	4.20567	2.43928	4.6222	4.67627
chr12_41601896_41602096	2.26591	1.00786	0.887978	2.47831	3.54345	2.73296	0.972427	2.72152	5.12073	4.6078	1.8333	0.932354	1.23087	0.977727	13.6083	1.97383	2.45655	3.53548	2.16764	1.01652	2.21575	1.69166	2.79788	0.958846	6.16147	2.21494	5.98493	7.77968	1.77398	2.96087	5.80624	5.18003	5.88794	4.06546	5.54664	0
chr12_43499709_43499909	4.53182	6.04714	2.66393	3.30441	3.54345	2.73296	5.83456	1.81435	1.70691	3.68624	4.58326	4.66177	7.38523	3.91091	3.40208	2.96074	7.36966	1.76774	5.4191	2.03305	1.10788	3.38333	2.79788	0.958846	1.02691	3.32242	12.9674	4.32204	4.43495	2.96087	4.14732	5.18003	0.841135	0.813092	5.54664	5.84534
chr12_43526105_43526376	15.8614	4.03143	5.32787	3.30441	5.31517	5.46592	2.91728	3.62869	4.26727	4.6078	6.41656	3.72942	2.46174	2.93318	5.95364	2.96074	6.14139	1.76774	3.25146	6.09915	1.10788	2.5375	3.73051	7.67077	5.13456	5.53736	2.99247	6.91527	2.66097	2.96087	5.80624	2.22001	6.72908	4.87855	7.39552	4.67627
chr12_44098567_44098767	2.26591	4.03143	7.10383	5.78271	2.65759	6.37691	8.75184	1.81435	11.0949	5.52936	1.8333	1.86471	4.92348	3.91091	2.55156	4.93457	3.68483	0.883869	0	2.03305	7.75514	0	0.932628	3.83538	3.08074	3.32242	1.99498	1.72882	0	3.94782	3.31785	8.88006	4.20567	4.06546	1.84888	2.33813
chr12_46443679_46443879	5.66477	1.00786	2.66393	3.30441	2.65759	3.64395	1.94485	2.72152	2.56036	3.68624	2.74995	1.86471	1.23087	2.93318	2.55156	0	3.68483	5.30321	3.25146	3.04957	13.2945	1.69166	1.86526	1.91769	4.10765	2.21494	2.99247	3.45763	4.43495	3.94782	4.14732	3.70002	8.41135	2.43928	3.69776	5.84534
chr12_47103967_47104209	2.26591	2.01571	6.21585	4.13051	0.885862	3.64395	2.91728	4.53587	2.56036	0.92156	2.74995	2.79706	2.46174	3.91091	4.2526	4.93457	2.45655	3.53548	4.33528	4.0661	1.10788	1.69166	1.86526	4.79423	3.08074	1.10747	12.9674	4.32204	2.66097	4.93478	6.6357	4.44003	3.36454	4.87855	1.84888	3.5072
chr12_49709006_49709284	5.66477	6.04714	3.55191	3.30441	5.31517	7.28789	3.88971	7.25739	5.97418	0.92156	3.66661	3.72942	4.92348	2.93318	0.85052	4.93457	4.91311	5.30321	4.33528	4.0661	0	4.22916	1.86526	1.91769	6.16147	6.64483	3.98995	2.59323	4.43495	6.90869	3.31785	3.70002	5.04681	4.87855	4.6222	16.3669
chr12_51623761_51623961	4.53182	6.04714	3.55191	1.6522	3.54345	2.73296	2.91728	6.35022	3.41382	4.6078	3.66661	2.79706	14.7705	2.93318	2.55156	0	3.68483	7.95482	4.33528	3.04957	1.10788	2.5375	7.46102	3.83538	5.13456	4.42989	3.98995	2.59323	4.43495	3.94782	1.65893	7.40005	4.20567	4.87855	2.77332	4.67627
chr12_57312301_57312563	1.13295	2.01571	1.77596	1.6522	3.54345	2.73296	2.91728	1.81435	4.26727	3.68624	0.916652	0.932354	3.69261	0.977727	1.70104	0.986915	1.22828	4.41934	1.08382	3.04957	3.32363	2.5375	1.86526	4.79423	3.08074	4.42989	2.99247	2.59323	2.66097	9.86956	2.48839	5.18003	3.36454	3.25237	3.69776	4.67627
chr12_58240802_58241002	2.26591	4.03143	6.21585	4.95661	2.65759	1.82197	5.83456	4.53587	9.388	4.6078	6.41656	2.79706	2.46174	3.91091	7.65468	3.94766	0	2.65161	4.33528	3.04957	13.2945	5.92083	7.46102	8.62962	3.08074	7.75231	1.99498	6.05086	2.66097	2.96087	4.14732	5.18003	3.36454	5.69165	6.47108	3.5072
chr12_58962132_58962332	2.26591	2.01571	2.66393	1.6522	2.65759	0.910987	12.6415	5.44304	4.26727	3.68624	2.74995	2.79706	3.69261	4.88863	4.2526	5.92149	2.45655	3.53548	9.75439	2.03305	1.10788	4.22916	0.932628	3.83538	3.08074	3.32242	3.98995	3.45763	6.20893	2.96087	2.48839	1.48001	3.36454	5.69165	6.47108	2.33813
chr12_59007428_59007628	2.26591	5.03928	0.887978	4.95661	7.0869	6.37691	2.91728	3.62869	2.56036	9.2156	6.41656	5.59413	2.46174	5.86636	1.70104	3.94766	3.68483	3.53548	3.25146	8.1322	3.32363	2.5375	2.79788	8.62962	11.296	3.32242	5.98493	2.59323	0	3.94782	3.31785	5.92004	5.04681	6.50474	5.54664	3.5072
chr12_59374901_59375101	0	1.00786	1.77596	0.826102	3.54345	3.64395	11.6691	3.62869	2.56036	3.68624	2.74995	7.45883	2.46174	3.91091	2.55156	5.92149	2.45655	6.18708	4.33528	3.04957	3.32363	1.69166	3.73051	5.75308	7.18839	3.32242	3.98995	1.72882	7.09591	2.96087	4.97678	5.18003	3.36454	3.25237	4.6222	4.67627
chr12_60027134_60027334	5.66477	8.06285	1.77596	4.95661	2.65759	1.82197	2.91728	5.44304	1.70691	1.84312	2.74995	4.66177	3.69261	0.977727	1.70104	1.97383	2.45655	2.65161	6.50292	3.04957	13.2945	5.92083	0	3.83538	4.10765	1.10747	3.98995	1.72882	1.77398	0.986956	0.829463	0.740005	2.5234	3.25237	5.54664	4.67627
chr12_60335121_60335321	7.93068	5.03928	4.43989	3.30441	3.54345	12.7538	2.91728	2.72152	3.41382	2.76468	2.74995	2.79706	2.46174	1.95545	0	4.93457	4.91311	7.07095	3.25146	0	2.21575	3.38333	2.79788	3.83538	2.05382	5.53736	0.997489	1.72882	5.32194	0.986956	3.31785	5.18003	0	3.25237	2.77332	2.33813
chr12_61223958_61224158	4.53182	4.03143	4.43989	2.47831	3.54345	3.64395	1.94485	4.53587	0.853455	4.6078	2.74995	5.59413	2.46174	4.88863	2.55156	3.94766	2.45655	3.53548	4.33528	1.01652	3.32363	2.5375	2.79788	1.91769	13.3499	6.64483	1.99498	7.77968	2.66097	2.96087	8.29463	3.70002	1.68227	1.62618	4.6222	7.0144
chr12_63938859_63939112	2.26591	5.03928	6.21585	3.30441	4.42931	6.37691	2.91728	4.53587	1.70691	5.52936	7.33321	6.52648	4.92348	8.79954	5.10312	2.96074	2.45655	4.41934	0	3.04957	15.5103	8.45832	4.66314	2.87654	9.24221	3.32242	1.99498	5.18645	4.43495	3.94782	3.31785	6.66004	8.41135	7.31783	12.0177	4.67627
chr12_64178554_64178754	4.53182	5.03928	2.66393	2.47831	3.54345	3.64395	11.6691	4.53587	3.41382	4.6078	4.58326	0.932354	1.23087	4.88863	5.95364	0.986915	1.22828	4.41934	4.33528	4.0661	4.43151	4.22916	7.46102	2.87654	3.08074	4.42989	1.99498	6.91527	5.32194	6.90869	8.29463	2.96002	5.04681	4.87855	6.47108	0
chr12_65071638_65071838	4.53182	5.03928	3.55191	5.78271	5.31517	1.82197	2.91728	3.62869	2.56036	5.52936	4.58326	0	4.92348	1.95545	0.85052	0.986915	4.91311	6.18708	5.4191	4.0661	5.53938	4.22916	4.66314	4.79423	13.3499	3.32242	2.99247	2.59323	5.32194	7.89565	4.14732	4.44003	1.68227	4.87855	4.6222	4.67627
chr12_66295169_66295369	3.39886	4.03143	3.55191	4.13051	2.65759	2.73296	5.83456	1.81435	4.26727	2.76468	2.74995	1.86471	3.69261	2.93318	11.0568	2.96074	0	4.41934	0	5.08262	8.86302	4.22916	2.79788	5.75308	3.08074	4.42989	3.98995	5.18645	5.32194	4.93478	5.80624	3.70002	3.36454	4.06546	1.84888	2.33813
chr12_66451404_66451604	32.8557	36.2828	34.6312	44.6095	43.4073	37.3505	44.7316	38.1013	36.6985	46.9995	44.9159	34.4971	45.5422	45.9532	39.1239	30.5944	31.9352	39.7741	40.1014	43.7106	31.0206	48.2124	33.5746	34.5185	33.8881	36.5466	53.8644	34.5763	31.0446	37.5043	53.0856	34.0402	47.1036	41.4677	43.4487	35.072
chr12_66546252_66546452	3.39886	2.01571	0.887978	5.78271	3.54345	7.28789	2.91728	3.62869	12.8018	2.76468	0.916652	1.86471	3.69261	5.86636	4.2526	0.986915	1.22828	2.65161	0	4.0661	5.53938	5.07499	2.79788	4.79423	3.08074	4.42989	4.98744	6.05086	5.32194	0	5.80624	2.22001	4.20567	3.25237	2.77332	5.84534
chr12_66736647_66736847	5.66477	2.01571	13.3197	5.78271	1.77172	0.910987	2.91728	3.62869	3.41382	5.52936	4.58326	0	1.23087	3.91091	1.70104	4.93457	4.91311	2.65161	4.33528	3.04957	1.10788	3.38333	6.5284	5.75308	3.08074	5.53736	3.98995	6.05086	7.09591	6.90869	2.48839	2.96002	2.5234	2.43928	4.6222	10.5216
chr12_66805680_66805880	1.13295	8.06285	1.77596	3.30441	2.65759	2.73296	4.86213	2.72152	2.56036	5.52936	6.41656	3.72942	4.92348	3.91091	5.10312	5.92149	2.45655	3.53548	2.16764	4.0661	2.21575	5.92083	4.66314	3.83538	1.02691	14.3971	8.9774	1.72882	2.66097	4.93478	6.6357	4.44003	2.5234	5.69165	1.84888	1.16907
chr12_69526963_69527191	3.39886	2.01571	3.55191	2.47831	0.885862	2.73296	2.91728	6.35022	1.70691	4.6078	4.58326	3.72942	7.38523	0.977727	1.70104	3.94766	4.91311	3.53548	5.4191	5.08262	3.32363	0	1.86526	9.58846	14.3768	3.32242	2.99247	3.45763	3.54796	2.96087	4.14732	3.70002	5.04681	2.43928	6.47108	3.5072
chr12_72564777_72564977	2.26591	5.03928	2.66393	2.47831	3.54345	11.8428	3.88971	7.25739	3.41382	4.6078	3.66661	0	4.92348	0.977727	1.70104	7.89532	2.45655	6.18708	2.16764	3.04957	0	1.69166	2.79788	3.83538	4.10765	2.21494	2.99247	2.59323	2.66097	0.986956	0.829463	2.22001	6.72908	2.43928	0.92444	5.84534
chr12_72853600_72853800	3.39886	2.01571	2.66393	2.47831	3.54345	4.55493	1.94485	2.72152	11.0949	3.68624	5.49991	1.86471	3.69261	0.977727	3.40208	0	1.22828	5.30321	4.33528	3.04957	2.21575	4.22916	4.66314	5.75308	3.08074	3.32242	2.99247	2.59323	6.20893	6.90869	3.31785	4.44003	5.04681	4.87855	3.69776	4.67627
chr12_73029400_73029600	1.13295	3.02357	2.66393	0.826102	0	0.910987	0	1.81435	3.41382	1.84312	1.8333	0.932354	2.46174	3.91091	0.85052	4.93457	1.22828	0.883869	1.08382	0	4.43151	1.69166	0	0.958846	0	1.10747	0	3.45763	1.77398	1.97391	1.65893	2.22001	1.68227	0.813092	0.92444	1.16907
chr12_75949664_75949879	2.26591	6.04714	14.2077	2.47831	3.54345	0.910987	3.88971	1.81435	1.70691	6.45092	4.58326	3.72942	0	0.977727	3.40208	1.97383	2.45655	3.53548	0	5.08262	9.97089	5.92083	5.59577	4.79423	1.02691	2.21494	3.98995	3.45763	5.32194	3.94782	4.14732	5.18003	2.5234	7.31783	3.69776	5.84534
chr12_76368270_76368541	9.06364	7.055	5.32787	7.43492	1.77172	1.82197	2.91728	5.44304	5.12073	4.6078	7.33321	4.66177	2.46174	4.88863	3.40208	9.86915	8.59794	5.30321	7.58674	5.08262	6.64726	5.92083	7.46102	18.2181	1.02691	5.53736	6.98242	4.32204	4.43495	5.92174	6.6357	2.22001	7.57021	7.31783	1.84888	5.84534
chr12_76664421_76664621	1.13295	5.03928	2.66393	2.47831	2.65759	2.73296	5.83456	3.62869	5.12073	1.84312	4.58326	1.86471	2.46174	7.82182	12.7578	6.9084	3.68483	4.41934	5.4191	6.09915	5.53938	5.07499	3.73051	6.71192	3.08074	3.32242	0.997489	6.05086	5.32194	1.97391	4.97678	2.22001	6.72908	4.06546	3.69776	9.35254
chr12_77455747_77455956	4.53182	4.03143	1.77596	7.43492	4.42931	4.55493	2.91728	3.62869	5.12073	2.76468	6.41656	0.932354	2.46174	3.91091	11.0568	3.94766	4.91311	0.883869	4.33528	4.0661	3.32363	3.38333	3.73051	0.958846	10.2691	7.75231	2.99247	6.05086	2.66097	5.92174	3.31785	2.96002	4.20567	4.87855	2.77332	3.5072
chr12_78428662_78428862	3.39886	4.03143	4.43989	6.60881	3.54345	10.0209	4.86213	2.72152	1.70691	2.76468	2.74995	0.932354	3.69261	4.88863	5.10312	7.89532	2.45655	2.65161	13.0058	1.01652	3.32363	2.5375	3.73051	3.83538	7.18839	5.53736	5.98493	2.59323	3.54796	1.97391	2.48839	2.22001	7.57021	4.06546	5.54664	2.33813
chr12_82668798_82669022	1.13295	6.04714	3.55191	3.30441	3.54345	7.28789	0	2.72152	5.97418	1.84312	5.49991	3.72942	3.69261	4.88863	5.10312	2.96074	3.68483	3.53548	18.425	5.08262	6.64726	3.38333	7.46102	3.83538	2.05382	4.42989	5.98493	2.59323	4.43495	2.96087	4.97678	4.44003	7.57021	3.25237	3.69776	3.5072
chr12_83683167_83683367	7.93068	5.03928	4.43989	1.6522	3.54345	3.64395	1.94485	2.72152	0	0.92156	1.8333	4.66177	3.69261	4.88863	1.70104	1.97383	4.91311	0.883869	3.25146	7.11567	2.21575	5.92083	2.79788	7.67077	12.3229	1.10747	0.997489	1.72882	5.32194	1.97391	4.14732	4.44003	2.5234	7.31783	2.77332	0
chr12_84416931_84417131	1.13295	1.00786	1.77596	4.13051	4.42931	1.82197	3.88971	2.72152	3.41382	0	1.8333	2.79706	6.15435	3.91091	4.2526	2.96074	2.45655	4.41934	2.16764	2.03305	3.32363	2.5375	0	3.83538	10.2691	4.42989	3.98995	0.864408	2.66097	0	2.48839	2.96002	1.68227	2.43928	2.77332	3.5072
chr12_85545123_85545323	2.26591	4.03143	3.55191	2.47831	1.77172	3.64395	5.83456	1.81435	1.70691	2.76468	2.74995	6.52648	2.46174	1.95545	2.55156	1.97383	3.68483	3.53548	3.25146	3.04957	2.21575	3.38333	5.59577	1.91769	3.08074	9.96725	11.9699	0.864408	2.66097	2.96087	3.31785	1.48001	3.36454	5.69165	3.69776	4.67627
chr12_87064150_87064350	1.13295	3.02357	2.66393	2.47831	1.77172	1.82197	12.6415	3.62869	5.12073	3.68624	4.58326	4.66177	8.6161	1.95545	4.2526	2.96074	6.14139	5.30321	2.16764	4.0661	5.53938	5.07499	1.86526	2.87654	2.05382	2.21494	4.98744	3.45763	6.20893	1.97391	4.14732	2.96002	2.5234	3.25237	3.69776	5.84534
chr12_90548708_90548929	4.53182	2.01571	4.43989	1.6522	2.65759	2.73296	4.86213	1.81435	3.41382	3.68624	2.74995	3.72942	2.46174	2.93318	5.10312	2.96074	6.14139	3.53548	4.33528	3.04957	16.6182	2.5375	0.932628	4.79423	5.13456	1.10747	2.99247	5.18645	4.43495	0	4.14732	2.22001	3.36454	5.69165	9.2444	10.5216
chr12_93059005_93059240	2.26591	1.00786	3.55191	12.3915	1.77172	6.37691	13.614	4.53587	5.97418	4.6078	2.74995	2.79706	6.15435	1.95545	2.55156	0.986915	8.59794	3.53548	2.16764	2.03305	1.10788	0.845832	2.79788	3.83538	4.10765	4.42989	3.98995	3.45763	3.54796	6.90869	2.48839	2.22001	1.68227	4.87855	4.6222	7.0144
chr12_93621238_93621438	3.39886	6.04714	7.10383	3.30441	4.42931	2.73296	3.88971	4.53587	5.12073	1.84312	3.66661	2.79706	7.38523	3.91091	2.55156	6.9084	4.91311	7.07095	14.0897	3.04957	4.43151	3.38333	3.73051	2.87654	6.16147	3.32242	4.98744	4.32204	2.66097	3.94782	0.829463	0.740005	1.68227	4.06546	5.54664	1.16907
chr12_95537767_95537967	2.26591	3.02357	6.21585	1.6522	3.54345	7.28789	1.94485	5.44304	3.41382	3.68624	3.66661	9.32354	1.23087	1.95545	2.55156	2.96074	1.22828	3.53548	2.16764	4.0661	6.64726	3.38333	5.59577	4.79423	11.296	2.21494	2.99247	2.59323	0.886989	2.96087	3.31785	5.18003	5.04681	2.43928	1.84888	2.33813
chr12_95663298_95663498	1.13295	3.02357	2.66393	3.30441	0.885862	0.910987	6.80699	6.35022	7.68109	0.92156	2.74995	0.932354	2.46174	4.88863	0.85052	1.97383	3.68483	1.76774	5.4191	2.03305	2.21575	2.5375	7.46102	4.79423	5.13456	4.42989	12.9674	1.72882	3.54796	1.97391	2.48839	6.66004	0	3.25237	1.84888	5.84534
chr12_98701257_98701490	14.7284	6.04714	1.77596	1.6522	4.42931	3.64395	5.83456	7.25739	1.70691	1.84312	3.66661	2.79706	3.69261	3.91091	3.40208	4.93457	3.68483	4.41934	4.33528	1.01652	3.32363	3.38333	1.86526	4.79423	4.10765	1.10747	3.98995	6.05086	6.20893	0.986956	2.48839	1.48001	3.36454	3.25237	4.6222	1.16907
chr12_98792939_98793139	3.39886	6.04714	4.43989	4.95661	4.42931	1.82197	2.91728	3.62869	2.56036	4.6078	0.916652	3.72942	3.69261	4.88863	11.9073	0.986915	3.68483	1.76774	4.33528	2.03305	4.43151	7.61249	5.59577	4.79423	2.05382	3.32242	0.997489	5.18645	7.09591	3.94782	1.65893	2.96002	3.36454	3.25237	1.84888	4.67627
chr12_102211821_102212030	14.7284	5.03928	3.55191	2.47831	2.65759	5.46592	3.88971	3.62869	3.41382	2.76468	3.66661	2.79706	2.46174	4.88863	5.10312	2.96074	7.36966	4.41934	1.08382	5.08262	5.53938	5.07499	0	2.87654	5.13456	3.32242	0.997489	6.05086	2.66097	4.93478	1.65893	4.44003	10.9348	3.25237	1.84888	3.5072
chr12_104253589_104253797	5.66477	5.03928	7.10383	2.47831	2.65759	1.82197	3.88971	3.62869	2.56036	2.76468	1.8333	2.79706	17.2322	3.91091	4.2526	4.93457	2.45655	1.76774	6.50292	7.11567	4.43151	4.22916	1.86526	4.79423	4.10765	3.32242	3.98995	2.59323	6.20893	6.90869	5.80624	4.44003	4.20567	2.43928	4.6222	7.0144
chr12_105464580_105464780	4.53182	6.04714	2.66393	4.95661	1.77172	2.73296	3.88971	2.72152	5.12073	1.84312	2.74995	2.79706	3.69261	5.86636	0.85052	5.92149	2.45655	4.41934	2.16764	2.03305	15.5103	5.92083	2.79788	5.75308	2.05382	4.42989	3.98995	3.45763	4.43495	5.92174	4.97678	2.96002	3.36454	6.50474	1.84888	7.0144
chr12_106794463_106794663	1.13295	3.02357	3.55191	4.95661	0.885862	6.37691	3.88971	2.72152	2.56036	1.84312	3.66661	0	6.15435	0.977727	2.55156	0.986915	2.45655	0	1.08382	1.01652	1.10788	3.38333	1.86526	1.91769	2.05382	2.21494	1.99498	1.72882	2.66097	5.92174	6.6357	3.70002	5.04681	2.43928	0.92444	9.35254
chr12_108079414_108079614	3.39886	10.0786	8.87978	6.60881	2.65759	10.0209	3.88971	8.16456	0.853455	5.52936	5.49991	9.32354	7.38523	7.82182	3.40208	4.93457	6.14139	3.53548	3.25146	3.04957	8.86302	3.38333	3.73051	4.79423	4.10765	6.64483	10.9724	6.05086	8.86989	3.94782	2.48839	5.18003	6.72908	6.50474	10.1688	2.33813
chr12_109020495_109020695	4.53182	6.04714	0.887978	4.95661	3.54345	6.37691	5.83456	2.72152	7.68109	5.52936	1.8333	0	2.46174	2.93318	2.55156	3.94766	2.45655	3.53548	13.0058	2.03305	2.21575	0.845832	4.66314	3.83538	0	2.21494	4.98744	4.32204	4.43495	0.986956	0.829463	7.40005	2.5234	3.25237	7.39552	4.67627
chr12_109819804_109820083	2.26591	1.00786	3.55191	1.6522	9.74449	7.28789	0.972427	4.53587	3.41382	6.45092	4.58326	3.72942	2.46174	3.91091	17.8609	6.9084	2.45655	2.65161	3.25146	2.03305	2.21575	3.38333	2.79788	5.75308	7.18839	1.10747	3.98995	0	7.09591	3.94782	3.31785	7.40005	0	5.69165	3.69776	5.84534
chr12_110146799_110146999	13.5955	1.00786	0.887978	5.78271	4.42931	0	0.972427	2.72152	0.853455	1.84312	2.74995	3.72942	3.69261	5.86636	4.2526	1.97383	2.45655	2.65161	4.33528	4.0661	6.64726	4.22916	2.79788	4.79423	5.13456	3.32242	4.98744	2.59323	0.886989	3.94782	4.97678	5.18003	2.5234	4.87855	5.54664	3.5072
chr12_110596326_110596526	3.39886	3.02357	5.32787	2.47831	2.65759	3.64395	1.94485	6.35022	4.26727	1.84312	4.58326	5.59413	3.69261	5.86636	11.0568	6.9084	2.45655	1.76774	5.4191	2.03305	7.75514	6.76666	1.86526	2.87654	3.08074	5.53736	4.98744	3.45763	7.9829	0.986956	4.14732	4.44003	2.5234	4.87855	2.77332	1.16907
chr12_111021157_111021357	2.26591	6.04714	6.21585	4.95661	7.97276	7.28789	5.83456	3.62869	5.97418	7.37248	3.66661	6.52648	11.0778	4.88863	5.10312	4.93457	1.22828	13.258	4.33528	8.1322	4.43151	7.61249	9.32628	7.67077	4.10765	7.75231	3.98995	3.45763	2.66097	1.97391	9.95356	5.92004	7.57021	1.62618	3.69776	8.18347
chr12_111299100_111299307	3.39886	4.03143	1.77596	6.60881	5.31517	3.64395	2.91728	1.81435	3.41382	2.76468	3.66661	7.45883	6.15435	1.95545	3.40208	7.89532	2.45655	2.65161	14.0897	4.0661	6.64726	2.5375	4.66314	5.75308	3.08074	4.42989	4.98744	3.45763	2.66097	5.92174	4.14732	3.70002	4.20567	1.62618	3.69776	4.67627
chr12_113468838_113469038	4.53182	8.06285	5.32787	3.30441	3.54345	2.73296	11.6691	3.62869	5.12073	4.6078	3.66661	2.79706	2.46174	2.93318	5.95364	2.96074	3.68483	3.53548	3.25146	4.0661	2.21575	4.22916	3.73051	4.79423	0	0	2.99247	4.32204	0.886989	1.97391	3.31785	3.70002	1.68227	2.43928	6.47108	0
chr12_114159569_114159769	1.13295	2.01571	1.77596	4.13051	2.65759	3.64395	6.80699	2.72152	5.97418	2.76468	4.58326	2.79706	1.23087	4.88863	2.55156	4.93457	1.22828	2.65161	13.0058	8.1322	4.43151	4.22916	2.79788	2.87654	5.13456	2.21494	2.99247	5.18645	3.54796	0.986956	1.65893	4.44003	2.5234	4.87855	1.84888	2.33813
chr12_116715425_116715625	5.66477	5.03928	6.21585	5.78271	7.97276	5.46592	10.6967	7.25739	4.26727	12.9018	6.41656	9.32354	7.38523	6.84409	6.80416	7.89532	1.22828	5.30321	7.58674	8.1322	8.86302	6.76666	3.73051	5.75308	4.10765	3.32242	11.9699	1.72882	10.6439	3.94782	3.31785	6.66004	8.41135	4.87855	2.77332	4.67627
chr12_117080447_117080670	6.79773	10.0786	4.43989	10.7393	5.31517	4.55493	14.5864	2.72152	7.68109	3.68624	2.74995	3.72942	6.15435	6.84409	3.40208	5.92149	1.22828	7.95482	3.25146	3.04957	2.21575	7.61249	7.46102	1.91769	4.10765	2.21494	3.98995	6.91527	1.77398	4.93478	4.14732	2.96002	5.04681	2.43928	3.69776	2.33813
chr12_118314948_118315201	4.53182	3.02357	3.55191	3.30441	7.97276	3.64395	2.91728	1.81435	7.68109	1.84312	1.8333	3.72942	18.4631	4.88863	4.2526	6.9084	4.91311	6.18708	5.4191	4.0661	3.32363	1.69166	5.59577	4.79423	4.10765	3.32242	5.98493	1.72882	1.77398	7.89565	7.46517	6.66004	5.88794	3.25237	6.47108	2.33813
chr12_119145582_119145910	6.79773	6.04714	9.76776	7.43492	7.97276	10.0209	15.5588	10.8861	16.2156	9.2156	6.41656	8.39119	11.0778	6.84409	5.95364	11.843	3.68483	9.72256	2.16764	7.11567	5.53938	5.92083	12.1242	6.71192	5.13456	5.53736	9.97489	8.64408	5.32194	6.90869	3.31785	11.8401	12.617	4.87855	9.2444	9.35254
chr12_120759972_120760172	6.79773	5.03928	2.66393	2.47831	5.31517	2.73296	3.88971	3.62869	3.41382	6.45092	5.49991	5.59413	2.46174	3.91091	5.95364	1.97383	4.91311	3.53548	13.0058	3.04957	6.64726	2.5375	6.5284	4.79423	1.02691	1.10747	3.98995	1.72882	2.66097	2.96087	6.6357	4.44003	2.5234	4.87855	2.77332	2.33813
chr12_120856015_120856265	6.79773	4.03143	2.66393	5.78271	3.54345	7.28789	12.6415	3.62869	6.82764	1.84312	2.74995	4.66177	1.23087	1.95545	5.10312	6.9084	2.45655	3.53548	3.25146	3.04957	2.21575	1.69166	0.932628	4.79423	4.10765	6.64483	2.99247	2.59323	2.66097	5.92174	4.14732	4.44003	9.25248	4.87855	1.84888	4.67627
chr12_122432009_122432263	3.39886	0	0.887978	0.826102	1.77172	0.910987	0	1.81435	1.70691	1.84312	0	0	1.23087	0.977727	0	1.97383	1.22828	1.76774	0	1.01652	0	0.845832	2.79788	2.87654	1.02691	0	0.997489	0	0.886989	0.986956	0.829463	0	0	0	0	2.33813
chr12_122434025_122434263	6.79773	7.055	4.43989	3.30441	0.885862	5.46592	12.6415	3.62869	3.41382	4.6078	4.58326	5.59413	2.46174	1.95545	3.40208	2.96074	3.68483	5.30321	3.25146	6.09915	7.75514	5.92083	6.5284	3.83538	6.16147	0	4.98744	4.32204	3.54796	3.94782	2.48839	0.740005	6.72908	6.50474	1.84888	5.84534
chr12_122784847_122785066	3.39886	1.00786	6.21585	4.13051	2.65759	4.55493	14.5864	4.53587	4.26727	2.76468	0	2.79706	0	1.95545	2.55156	1.97383	3.68483	1.76774	4.33528	2.03305	1.10788	4.22916	4.66314	3.83538	6.16147	3.32242	3.98995	0	4.43495	2.96087	2.48839	2.96002	3.36454	7.31783	1.84888	1.16907
chr12_124007124_124007324	4.53182	2.01571	2.66393	2.47831	7.97276	3.64395	11.6691	4.53587	2.56036	3.68624	7.33321	1.86471	1.23087	2.93318	3.40208	2.96074	8.59794	0.883869	7.58674	4.0661	1.10788	1.69166	0	3.83538	3.08074	5.53736	5.98493	3.45763	3.54796	2.96087	2.48839	2.22001	3.36454	2.43928	2.77332	4.67627
chr12_124247195_124247395	5.66477	6.04714	4.43989	4.95661	3.54345	0.910987	8.75184	6.35022	4.26727	4.6078	4.58326	3.72942	2.46174	2.93318	4.2526	0.986915	4.91311	3.53548	5.4191	2.03305	3.32363	3.38333	0	5.75308	2.05382	3.32242	8.9774	5.18645	1.77398	3.94782	1.65893	4.44003	4.20567	4.06546	3.69776	5.84534
chr12_124577799_124577999	1.13295	4.03143	4.43989	2.47831	1.77172	6.37691	0.972427	3.62869	6.82764	5.52936	5.49991	2.79706	7.38523	2.93318	9.35572	3.94766	1.22828	4.41934	3.25146	2.03305	2.21575	4.22916	2.79788	3.83538	3.08074	4.42989	0.997489	6.91527	7.9829	4.93478	5.80624	2.96002	5.04681	3.25237	3.69776	4.67627
chr12_126024474_126024682	6.79773	1.00786	4.43989	6.60881	3.54345	1.82197	0.972427	6.35022	2.56036	2.76468	0.916652	7.45883	2.46174	3.91091	3.40208	4.93457	6.14139	3.53548	15.1735	6.09915	1.10788	5.92083	2.79788	3.83538	4.10765	3.32242	3.98995	0.864408	3.54796	2.96087	5.80624	3.70002	8.41135	5.69165	1.84888	2.33813
chr12_131658768_131658968	3.39886	3.02357	4.43989	7.43492	6.20104	3.64395	5.83456	1.81435	3.41382	2.76468	4.58326	5.59413	14.7705	2.93318	5.10312	1.97383	2.45655	3.53548	3.25146	2.03305	2.21575	3.38333	2.79788	1.91769	3.08074	2.21494	5.98493	0	1.77398	3.94782	4.97678	5.92004	6.72908	4.87855	3.69776	4.67627
chr12_131704615_131704815	2.26591	3.02357	2.66393	1.6522	7.0869	4.55493	12.6415	2.72152	4.26727	6.45092	0	0.932354	2.46174	3.91091	0	3.94766	3.68483	0.883869	1.08382	3.04957	2.21575	5.07499	3.73051	4.79423	2.05382	2.21494	4.98744	0.864408	5.32194	5.92174	4.97678	2.96002	0.841135	3.25237	4.6222	3.5072
chr12_131848676_131848913	7.93068	10.0786	9.76776	9.08712	11.5162	3.64395	9.72427	9.07174	8.53455	8.29404	12.8331	5.59413	9.84697	7.82182	10.2062	7.89532	8.59794	6.18708	5.4191	4.0661	3.32363	6.76666	6.5284	13.4238	9.24221	11.0747	12.9674	9.50849	10.6439	6.90869	7.46517	14.0601	5.88794	6.50474	8.31996	11.6907
chr12_131971087_131971288	0	2.01571	13.3197	4.95661	5.31517	2.73296	2.91728	0.907174	2.56036	3.68624	3.66661	2.79706	1.23087	3.91091	3.40208	3.94766	3.68483	6.18708	3.25146	0	1.10788	3.38333	4.66314	3.83538	6.16147	4.42989	0.997489	5.18645	7.09591	1.97391	4.14732	5.18003	4.20567	1.62618	5.54664	4.67627
chr12_133040874_133041165	4.53182	5.03928	7.9918	4.13051	4.42931	4.55493	5.83456	10.8861	5.12073	3.68624	8.24986	6.52648	7.38523	10.755	5.10312	4.93457	7.36966	8.83869	9.75439	7.11567	6.64726	3.38333	2.79788	4.79423	4.10765	12.1822	1.99498	6.91527	1.77398	8.88261	5.80624	5.92004	7.57021	3.25237	13.8666	7.0144
chr13_19320439_19320659	4.53182	3.02357	3.55191	3.30441	7.0869	1.82197	1.94485	3.62869	2.56036	2.76468	1.8333	10.2559	4.92348	3.91091	5.10312	4.93457	4.91311	1.76774	3.25146	6.09915	2.21575	3.38333	1.86526	6.71192	5.13456	7.75231	1.99498	0.864408	2.66097	8.88261	2.48839	8.14005	6.72908	3.25237	5.54664	5.84534
chr13_20942822_20943022	3.39886	2.01571	4.43989	3.30441	2.65759	2.73296	0.972427	4.53587	2.56036	3.68624	4.58326	1.86471	3.69261	4.88863	8.5052	0.986915	3.68483	4.41934	1.08382	1.01652	2.21575	5.07499	5.59577	2.87654	14.3768	1.10747	0.997489	5.18645	1.77398	2.96087	4.14732	1.48001	2.5234	2.43928	5.54664	3.5072
chr13_20967532_20967883	2.26591	8.06285	7.10383	8.26102	2.65759	8.19888	16.5313	4.53587	2.56036	1.84312	10.0832	9.32354	7.38523	9.77727	4.2526	6.9084	1.22828	2.65161	2.16764	4.0661	6.64726	2.5375	9.32628	5.75308	4.10765	4.42989	5.98493	0.864408	6.20893	4.93478	2.48839	4.44003	4.20567	4.06546	8.31996	3.5072
chr13_21816909_21817125	21.5261	20.1571	15.9836	10.7393	14.1738	20.9527	12.6415	21.7722	17.9225	15.6665	19.2497	15.85	13.5396	14.6659	20.4125	18.7514	14.7393	14.1419	13.0058	23.3801	11.0788	16.0708	8.39365	14.3827	17.4575	21.042	13.9648	12.9661	19.5138	16.7783	14.9303	13.3201	15.1404	20.3273	19.4132	18.7051
chr13_22706552_22706781	4.53182	8.06285	7.10383	3.30441	5.31517	4.55493	13.614	1.81435	1.70691	2.76468	2.74995	3.72942	1.23087	4.88863	5.95364	4.93457	7.36966	2.65161	3.25146	4.0661	5.53938	5.07499	2.79788	9.58846	2.05382	7.75231	2.99247	3.45763	3.54796	3.94782	3.31785	5.92004	2.5234	4.06546	4.6222	7.0144
chr13_23600009_23600217	3.39886	1.00786	0.887978	3.30441	3.54345	1.82197	14.5864	2.72152	5.97418	3.68624	3.66661	3.72942	2.46174	1.95545	3.40208	8.88223	1.22828	0.883869	1.08382	2.03305	1.10788	3.38333	2.79788	3.83538	1.02691	6.64483	3.98995	1.72882	1.77398	3.94782	3.31785	5.18003	3.36454	6.50474	2.77332	2.33813
chr13_25060051_25060251	2.26591	4.03143	5.32787	5.78271	5.31517	2.73296	6.80699	5.44304	11.9484	4.6078	6.41656	1.86471	3.69261	9.77727	2.55156	3.94766	1.22828	4.41934	4.33528	4.0661	3.32363	4.22916	0.932628	0.958846	6.16147	3.32242	3.98995	6.05086	7.09591	4.93478	4.14732	4.44003	5.04681	2.43928	0.92444	1.16907
chr13_25941724_25941924	2.26591	3.02357	1.77596	1.6522	3.54345	4.55493	0.972427	2.72152	0.853455	2.76468	3.66661	5.59413	3.69261	2.93318	0.85052	0	3.68483	1.76774	5.4191	3.04957	3.32363	3.38333	2.79788	6.71192	12.3229	2.21494	1.99498	5.18645	1.77398	4.93478	1.65893	2.96002	5.04681	3.25237	3.69776	1.16907
chr13_26556663_26556882	7.93068	2.01571	13.3197	2.47831	3.54345	6.37691	7.77942	0.907174	3.41382	2.76468	3.66661	2.79706	6.15435	4.88863	5.95364	2.96074	6.14139	2.65161	16.2573	3.04957	5.53938	5.07499	0.932628	1.91769	4.10765	6.64483	2.99247	2.59323	6.20893	4.93478	4.14732	4.44003	4.20567	4.87855	3.69776	8.18347
chr13_27414743_27414943	2.26591	5.03928	4.43989	1.6522	1.77172	4.55493	3.88971	4.53587	5.97418	5.52936	4.58326	3.72942	3.69261	3.91091	11.0568	0.986915	3.68483	7.95482	2.16764	10.1652	4.43151	2.5375	3.73051	2.87654	4.10765	5.53736	6.98242	2.59323	5.32194	3.94782	2.48839	2.22001	4.20567	5.69165	4.6222	2.33813
chr13_28652824_28653024	3.39886	2.01571	0.887978	3.30441	4.42931	0	0.972427	5.44304	1.70691	0	4.58326	11.1883	4.92348	0	6.80416	1.97383	3.68483	4.41934	2.16764	3.04957	3.32363	4.22916	2.79788	0.958846	4.10765	3.32242	0.997489	0.864408	1.77398	0.986956	2.48839	3.70002	2.5234	3.25237	1.84888	4.67627
chr13_29049222_29049433	1.13295	3.02357	2.66393	6.60881	2.65759	4.55493	2.91728	1.81435	2.56036	4.6078	2.74995	0.932354	4.92348	0.977727	5.95364	0.986915	2.45655	15.0258	5.4191	3.04957	1.10788	0.845832	4.66314	4.79423	2.05382	2.21494	3.98995	3.45763	3.54796	11.8435	4.97678	4.44003	1.68227	2.43928	3.69776	2.33813
chr13_29882777_29882977	3.39886	2.01571	2.66393	3.30441	1.77172	2.73296	1.94485	3.62869	3.41382	0.92156	2.74995	4.66177	3.69261	2.93318	3.40208	0.986915	4.91311	4.41934	6.50292	5.08262	15.5103	3.38333	5.59577	4.79423	4.10765	3.32242	1.99498	0	4.43495	0.986956	3.31785	2.22001	2.5234	2.43928	3.69776	3.5072
chr13_30152090_30152294	5.66477	2.01571	2.66393	6.60881	4.42931	3.64395	0	2.72152	0.853455	3.68624	4.58326	1.86471	6.15435	1.95545	1.70104	1.97383	3.68483	1.76774	4.33528	3.04957	5.53938	4.22916	1.86526	5.75308	14.3768	0	2.99247	4.32204	5.32194	4.93478	4.14732	2.96002	4.20567	2.43928	1.84888	1.16907
chr13_31522887_31523087	2.26591	1.00786	2.66393	2.47831	4.42931	0	1.94485	1.81435	3.41382	3.68624	2.74995	0.932354	3.69261	3.91091	1.70104	1.97383	6.14139	1.76774	4.33528	2.03305	9.97089	2.5375	1.86526	2.87654	0	6.64483	0.997489	1.72882	3.54796	3.94782	4.14732	1.48001	3.36454	1.62618	4.6222	3.5072
chr13_33123254_33123454	5.66477	1.00786	3.55191	3.30441	5.31517	5.46592	1.94485	3.62869	2.56036	5.52936	2.74995	5.59413	0	4.88863	13.6083	2.96074	9.82622	1.76774	1.08382	3.04957	0	5.92083	1.86526	6.71192	1.02691	1.10747	11.9699	2.59323	3.54796	2.96087	2.48839	2.96002	3.36454	4.06546	2.77332	3.5072
chr13_33160414_33160668	11.3295	11.0864	7.10383	4.95661	5.31517	4.55493	6.80699	6.35022	1.70691	8.29404	7.33321	8.39119	7.38523	5.86636	5.10312	9.86915	3.68483	6.18708	15.1735	6.09915	5.53938	11.8417	4.66314	11.5062	6.16147	9.96725	8.9774	12.1017	4.43495	3.94782	5.80624	8.88006	8.41135	8.94402	9.2444	4.67627
chr13_33377044_33377244	4.53182	5.03928	1.77596	6.60881	5.31517	4.55493	3.88971	2.72152	5.97418	4.6078	3.66661	4.66177	3.69261	1.95545	6.80416	6.9084	2.45655	3.53548	5.4191	3.04957	3.32363	4.22916	2.79788	4.79423	3.08074	2.21494	11.9699	5.18645	5.32194	3.94782	4.14732	5.18003	7.57021	4.06546	5.54664	3.5072
chr13_35290444_35290644	1.13295	12.0943	3.55191	3.30441	4.42931	2.73296	0.972427	1.81435	12.8018	0.92156	0.916652	4.66177	2.46174	0.977727	5.95364	5.92149	2.45655	4.41934	3.25146	0	3.32363	5.07499	5.59577	2.87654	0	4.42989	4.98744	5.18645	5.32194	5.92174	4.97678	2.22001	3.36454	2.43928	4.6222	3.5072
chr13_36532144_36532434	31.7227	34.2671	31.9672	32.218	24.8041	36.4395	22.3658	29.9367	26.4571	35.9408	22.9163	24.2412	24.6174	26.3986	22.964	29.6074	24.5655	28.2838	28.1793	29.4792	22.1575	25.375	24.2483	26.8477	34.915	39.869	18.9523	23.339	28.3837	31.5826	31.5196	31.8202	26.0752	26.832	29.5821	28.0576
chr13_36681019_36681219	14.7284	3.02357	4.43989	4.13051	3.54345	0	5.83456	7.25739	6.82764	3.68624	3.66661	2.79706	4.92348	1.95545	2.55156	0.986915	3.68483	7.07095	2.16764	1.01652	4.43151	4.22916	1.86526	5.75308	4.10765	0	2.99247	4.32204	3.54796	4.93478	6.6357	4.44003	5.88794	4.06546	4.6222	4.67627
chr13_39091641_39091844	3.39886	3.02357	1.77596	1.6522	2.65759	3.64395	3.88971	0.907174	2.56036	6.45092	5.49991	1.86471	1.23087	3.91091	4.2526	5.92149	1.22828	0.883869	5.4191	1.01652	3.32363	0.845832	3.73051	4.79423	2.05382	2.21494	3.98995	2.59323	2.66097	3.94782	8.29463	2.96002	5.04681	4.06546	3.69776	14.0288
chr13_40147051_40147261	4.53182	8.06285	4.43989	3.30441	2.65759	3.64395	2.91728	5.44304	3.41382	7.37248	0.916652	3.72942	3.69261	3.91091	8.5052	5.92149	7.36966	4.41934	2.16764	5.08262	5.53938	2.5375	6.5284	1.91769	2.05382	1.10747	15.9598	5.18645	5.32194	1.97391	4.97678	3.70002	4.20567	5.69165	2.77332	1.16907
chr13_40230430_40230630	4.53182	5.03928	0	4.95661	7.0869	4.55493	2.91728	3.62869	10.2415	3.68624	5.49991	0.932354	1.23087	4.88863	5.95364	4.93457	2.45655	3.53548	4.33528	3.04957	0	4.22916	2.79788	5.75308	3.08074	2.21494	5.98493	2.59323	3.54796	2.96087	4.97678	2.22001	0.841135	2.43928	7.39552	3.5072
chr13_40535527_40535727	1.13295	4.03143	5.32787	4.13051	7.0869	4.55493	4.86213	0.907174	3.41382	1.84312	3.66661	5.59413	3.69261	2.93318	2.55156	2.96074	3.68483	4.41934	11.922	3.04957	3.32363	2.5375	6.5284	2.87654	6.16147	3.32242	2.99247	2.59323	3.54796	2.96087	4.97678	4.44003	3.36454	7.31783	0.92444	2.33813
chr13_40555105_40555341	15.8614	8.06285	5.32787	7.43492	0.885862	7.28789	2.91728	4.53587	5.12073	6.45092	2.74995	1.86471	2.46174	3.91091	1.70104	6.9084	6.14139	2.65161	3.25146	3.04957	5.53938	4.22916	5.59577	3.83538	3.08074	1.10747	0.997489	7.77968	7.9829	7.89565	4.14732	8.14005	5.88794	4.06546	6.47108	4.67627
chr13_41411479_41411679	1.13295	4.03143	2.66393	4.95661	1.77172	3.64395	4.86213	2.72152	2.56036	4.6078	0.916652	0	0	3.91091	3.40208	4.93457	3.68483	2.65161	13.0058	9.14872	2.21575	2.5375	3.73051	1.91769	2.05382	1.10747	8.9774	1.72882	1.77398	1.97391	3.31785	4.44003	1.68227	3.25237	2.77332	1.16907
chr13_41556209_41556440	2.26591	6.04714	3.55191	0.826102	2.65759	4.55493	1.94485	2.72152	5.12073	4.6078	9.16652	2.79706	6.15435	8.79954	1.70104	4.93457	2.45655	4.41934	16.2573	2.03305	4.43151	8.45832	3.73051	0.958846	7.18839	2.21494	1.99498	1.72882	5.32194	0.986956	3.31785	3.70002	6.72908	3.25237	4.6222	4.67627
chr13_42231018_42231284	3.39886	2.01571	2.66393	2.47831	0.885862	3.64395	6.80699	8.16456	7.68109	1.84312	2.74995	4.66177	1.23087	7.82182	3.40208	3.94766	4.91311	0	2.16764	3.04957	5.53938	6.76666	3.73051	6.71192	14.3768	6.64483	2.99247	5.18645	6.20893	3.94782	7.46517	3.70002	3.36454	4.87855	3.69776	9.35254
chr13_43487049_43487390	4.53182	4.03143	3.55191	3.30441	7.0869	1.82197	2.91728	7.25739	3.41382	2.76468	5.49991	0.932354	18.4631	4.88863	8.5052	2.96074	6.14139	6.18708	4.33528	11.1818	8.86302	4.22916	4.66314	4.79423	3.08074	5.53736	6.98242	3.45763	6.20893	0.986956	4.97678	5.18003	8.41135	6.50474	4.6222	3.5072
chr13_43867428_43867662	2.26591	6.04714	1.77596	4.95661	2.65759	2.73296	15.5588	1.81435	5.97418	2.76468	3.66661	4.66177	2.46174	2.93318	5.95364	1.97383	2.45655	2.65161	4.33528	5.08262	0	4.22916	3.73051	5.75308	5.13456	6.64483	0.997489	2.59323	0.886989	2.96087	4.97678	2.96002	3.36454	5.69165	1.84888	3.5072
chr13_45322390_45322599	3.39886	2.01571	2.66393	3.30441	5.31517	1.82197	2.91728	0.907174	12.8018	6.45092	1.8333	2.79706	2.46174	2.93318	1.70104	5.92149	8.59794	2.65161	0	7.11567	1.10788	2.5375	3.73051	1.91769	4.10765	2.21494	0.997489	3.45763	5.32194	2.96087	1.65893	2.96002	3.36454	3.25237	2.77332	3.5072
chr13_45598134_45598334	11.3295	2.01571	1.77596	4.13051	0	4.55493	0.972427	2.72152	0	3.68624	2.74995	1.86471	2.46174	1.95545	0.85052	1.97383	2.45655	5.30321	0	1.01652	2.21575	3.38333	0.932628	3.83538	2.05382	1.10747	0	3.45763	3.54796	1.97391	1.65893	4.44003	0.841135	0.813092	1.84888	1.16907
chr13_46208776_46208976	3.39886	2.01571	4.43989	4.13051	1.77172	0	4.86213	4.53587	5.97418	2.76468	5.49991	2.79706	4.92348	2.93318	4.2526	4.93457	4.91311	2.65161	2.16764	4.0661	2.21575	4.22916	3.73051	2.87654	12.3229	4.42989	3.98995	4.32204	2.66097	3.94782	4.97678	4.44003	1.68227	1.62618	1.84888	3.5072
chr13_46910868_46911068	5.66477	2.01571	3.55191	4.13051	2.65759	2.73296	6.80699	3.62869	2.56036	5.52936	4.58326	0	4.92348	4.88863	4.2526	1.97383	1.22828	1.76774	3.25146	3.04957	15.5103	2.5375	2.79788	0.958846	6.16147	2.21494	3.98995	3.45763	3.54796	3.94782	2.48839	3.70002	4.20567	3.25237	2.77332	5.84534
chr13_47595890_47596109	4.53182	2.01571	1.77596	4.13051	2.65759	5.46592	3.88971	2.72152	1.70691	3.68624	6.41656	3.72942	2.46174	2.93318	1.70104	7.89532	6.14139	4.41934	6.50292	5.08262	1.10788	3.38333	4.66314	2.87654	6.16147	4.42989	6.98242	4.32204	3.54796	2.96087	1.65893	2.96002	8.41135	8.94402	5.54664	16.3669
chr13_48833034_48833266	5.66477	2.01571	2.66393	7.43492	3.54345	1.82197	4.86213	3.62869	3.41382	3.68624	3.66661	8.39119	4.92348	1.95545	3.40208	6.9084	1.22828	4.41934	7.58674	11.1818	4.43151	3.38333	8.39365	0.958846	15.4037	5.53736	2.99247	1.72882	4.43495	3.94782	5.80624	4.44003	5.04681	4.06546	6.47108	2.33813
chr13_49308083_49308283	4.53182	6.04714	4.43989	4.13051	1.77172	5.46592	11.6691	4.53587	3.41382	3.68624	10.9998	1.86471	4.92348	5.86636	1.70104	2.96074	3.68483	3.53548	4.33528	2.03305	5.53938	4.22916	1.86526	1.91769	5.13456	2.21494	1.99498	0.864408	3.54796	3.94782	5.80624	5.92004	0.841135	4.06546	5.54664	2.33813
chr13_49666985_49667220	3.39886	5.03928	3.55191	4.95661	1.77172	7.28789	6.80699	7.25739	1.70691	2.76468	3.66661	2.79706	7.38523	0.977727	1.70104	3.94766	2.45655	1.76774	16.2573	1.01652	7.75514	4.22916	3.73051	6.71192	2.05382	2.21494	5.98493	2.59323	1.77398	2.96087	2.48839	1.48001	5.04681	3.25237	3.69776	3.5072
chr13_50024341_50024541	1.13295	7.055	3.55191	3.30441	3.54345	2.73296	6.80699	5.44304	5.12073	8.29404	0.916652	2.79706	2.46174	6.84409	6.80416	2.96074	4.91311	3.53548	2.16764	3.04957	13.2945	4.22916	3.73051	1.91769	4.10765	2.21494	6.98242	4.32204	7.9829	1.97391	1.65893	2.96002	4.20567	4.06546	3.69776	1.16907
chr13_50699653_50699853	1.13295	7.055	4.43989	9.08712	2.65759	7.28789	8.75184	2.72152	7.68109	4.6078	6.41656	2.79706	2.46174	4.88863	5.95364	6.9084	12.2828	6.18708	5.4191	5.08262	8.86302	5.92083	2.79788	1.91769	5.13456	13.2897	6.98242	2.59323	6.20893	4.93478	4.97678	8.88006	3.36454	7.31783	3.69776	4.67627
chr13_50832466_50832666	2.26591	5.03928	5.32787	0	5.31517	1.82197	3.88971	3.62869	5.97418	4.6078	2.74995	2.79706	3.69261	5.86636	4.2526	3.94766	4.91311	3.53548	4.33528	6.09915	1.10788	1.69166	3.73051	8.62962	4.10765	14.3971	4.98744	6.91527	6.20893	3.94782	7.46517	4.44003	3.36454	7.31783	2.77332	3.5072
chr13_51092427_51092633	16.9943	6.04714	4.43989	5.78271	6.20104	1.82197	1.94485	2.72152	7.68109	1.84312	6.41656	2.79706	4.92348	1.95545	5.10312	5.92149	2.45655	0.883869	3.25146	5.08262	4.43151	5.07499	2.79788	0.958846	4.10765	2.21494	0	7.77968	3.54796	3.94782	4.14732	5.18003	5.04681	0.813092	2.77332	1.16907
chr13_54123702_54123902	3.39886	3.02357	0.887978	2.47831	2.65759	1.82197	2.91728	7.25739	2.56036	0	6.41656	4.66177	1.23087	2.93318	3.40208	1.97383	4.91311	5.30321	1.08382	1.01652	3.32363	0.845832	2.79788	1.91769	3.08074	6.64483	11.9699	2.59323	0.886989	2.96087	2.48839	1.48001	3.36454	3.25237	3.69776	4.67627
chr13_59611237_59611437	3.39886	3.02357	2.66393	4.13051	2.65759	4.55493	1.94485	3.62869	2.56036	4.6078	5.49991	0	2.46174	1.95545	4.2526	4.93457	4.91311	3.53548	13.0058	2.03305	3.32363	4.22916	4.66314	1.91769	5.13456	2.21494	2.99247	4.32204	4.43495	2.96087	2.48839	5.18003	5.04681	4.06546	2.77332	3.5072
chr13_61001028_61001228	5.66477	3.02357	5.32787	3.30441	0	5.46592	4.86213	3.62869	2.56036	3.68624	4.58326	0	1.23087	0	0.85052	0.986915	3.68483	2.65161	3.25146	3.04957	4.43151	4.22916	0.932628	2.87654	5.13456	14.3971	1.99498	3.45763	1.77398	3.94782	2.48839	0.740005	4.20567	3.25237	1.84888	7.0144
chr13_62238663_62238863	3.39886	3.02357	4.43989	3.30441	0	10.0209	3.88971	0	4.26727	2.76468	4.58326	1.86471	3.69261	1.95545	0.85052	2.96074	3.68483	4.41934	6.50292	4.0661	3.32363	2.5375	1.86526	5.75308	3.08074	1.10747	0.997489	3.45763	0.886989	2.96087	2.48839	2.96002	4.20567	4.06546	5.54664	14.0288
chr13_62392436_62392636	1.13295	5.03928	4.43989	3.30441	0.885862	1.82197	4.86213	3.62869	2.56036	0.92156	1.8333	2.79706	2.46174	4.88863	4.2526	2.96074	2.45655	6.18708	1.08382	8.1322	3.32363	1.69166	2.79788	0	11.296	12.1822	1.99498	3.45763	4.43495	1.97391	1.65893	2.22001	5.88794	4.06546	1.84888	2.33813
chr13_63378723_63378923	5.66477	1.00786	5.32787	2.47831	3.54345	0.910987	3.88971	3.62869	11.9484	4.6078	2.74995	0	6.15435	4.88863	5.95364	2.96074	3.68483	1.76774	2.16764	3.04957	5.53938	3.38333	0	3.83538	5.13456	3.32242	3.98995	1.72882	1.77398	0	4.14732	2.22001	2.5234	5.69165	2.77332	1.16907
chr13_65167652_65167865	1.13295	8.06285	4.43989	0.826102	1.77172	1.82197	4.86213	5.44304	0.853455	2.76468	1.8333	6.52648	2.46174	3.91091	4.2526	1.97383	2.45655	2.65161	2.16764	7.11567	1.10788	4.22916	5.59577	0.958846	5.13456	12.1822	4.98744	5.18645	1.77398	5.92174	4.97678	5.92004	2.5234	1.62618	0.92444	4.67627
chr13_66176639_66176839	1.13295	5.03928	3.55191	2.47831	5.31517	2.73296	3.88971	3.62869	4.26727	4.6078	4.58326	2.79706	11.0778	0.977727	11.9073	1.97383	1.22828	4.41934	4.33528	7.11567	3.32363	1.69166	5.59577	4.79423	2.05382	1.10747	6.98242	3.45763	1.77398	7.89565	0.829463	2.22001	1.68227	4.06546	0	2.33813
chr13_67342361_67342597	5.66477	0	14.2077	3.30441	2.65759	4.55493	2.91728	5.44304	5.12073	2.76468	1.8333	3.72942	6.15435	6.84409	2.55156	5.92149	2.45655	3.53548	4.33528	3.04957	1.10788	2.5375	2.79788	1.91769	5.13456	3.32242	4.98744	2.59323	4.43495	4.93478	4.97678	3.70002	4.20567	1.62618	1.84888	3.5072
chr13_67617191_67617391	5.66477	3.02357	12.4317	7.43492	6.20104	0.910987	0	3.62869	5.97418	6.45092	4.58326	2.79706	1.23087	0.977727	4.2526	0.986915	1.22828	5.30321	1.08382	1.01652	2.21575	2.5375	4.66314	4.79423	1.02691	3.32242	3.98995	4.32204	7.09591	4.93478	2.48839	2.96002	5.88794	3.25237	3.69776	3.5072
chr13_68301044_68301258	2.26591	6.04714	5.32787	4.95661	3.54345	5.46592	0.972427	6.35022	4.26727	8.29404	4.58326	3.72942	2.46174	1.95545	2.55156	3.94766	4.91311	5.30321	2.16764	4.0661	1.10788	2.5375	1.86526	5.75308	6.16147	2.21494	13.9648	5.18645	1.77398	2.96087	2.48839	3.70002	3.36454	4.87855	3.69776	2.33813
chr13_68718933_68719133	5.66477	4.03143	3.55191	3.30441	5.31517	3.64395	1.94485	3.62869	8.53455	1.84312	3.66661	1.86471	3.69261	1.95545	3.40208	3.94766	2.45655	0.883869	1.08382	7.11567	5.53938	5.92083	1.86526	4.79423	3.08074	0	12.9674	2.59323	3.54796	2.96087	5.80624	4.44003	0.841135	3.25237	3.69776	4.67627
chr13_70100739_70100939	1.13295	2.01571	2.66393	4.13051	2.65759	2.73296	2.91728	3.62869	11.9484	1.84312	5.49991	1.86471	2.46174	0	5.10312	3.94766	4.91311	3.53548	7.58674	6.09915	3.32363	3.38333	0.932628	0.958846	3.08074	4.42989	1.99498	4.32204	5.32194	7.89565	5.80624	4.44003	4.20567	2.43928	5.54664	3.5072
chr13_73168369_73168569	2.26591	1.00786	0	4.13051	4.42931	2.73296	2.91728	4.53587	3.41382	5.52936	3.66661	3.72942	2.46174	9.77727	1.70104	0.986915	2.45655	7.95482	11.922	6.09915	1.10788	2.5375	3.73051	4.79423	4.10765	6.64483	2.99247	1.72882	3.54796	0	0.829463	8.14005	1.68227	5.69165	4.6222	3.5072
chr13_77157739_77157939	4.53182	4.03143	2.66393	7.43492	2.65759	3.64395	4.86213	3.62869	11.9484	1.84312	2.74995	3.72942	3.69261	3.91091	6.80416	5.92149	1.22828	3.53548	5.4191	1.01652	3.32363	4.22916	3.73051	1.91769	3.08074	1.10747	3.98995	5.18645	2.66097	1.97391	1.65893	3.70002	2.5234	6.50474	3.69776	3.5072
chr13_77990733_77990974	4.53182	10.0786	4.43989	3.30441	2.65759	7.28789	6.80699	3.62869	0	4.6078	4.58326	5.59413	6.15435	3.91091	5.95364	2.96074	0	1.76774	14.0897	10.1652	2.21575	7.61249	7.46102	8.62962	10.2691	4.42989	2.99247	5.18645	5.32194	4.93478	5.80624	2.96002	4.20567	3.25237	4.6222	4.67627
chr13_78258222_78258422	3.39886	3.02357	2.66393	0	3.54345	0.910987	2.91728	1.81435	1.70691	0.92156	0	7.45883	2.46174	0.977727	0	3.94766	1.22828	1.76774	2.16764	2.03305	3.32363	3.38333	0	3.83538	2.05382	1.10747	1.99498	1.72882	1.77398	2.96087	1.65893	2.22001	0.841135	5.69165	0	0
chr13_80747918_80748162	6.79773	1.00786	3.55191	5.78271	3.54345	4.55493	14.5864	3.62869	3.41382	2.76468	8.24986	3.72942	3.69261	3.91091	2.55156	3.94766	3.68483	6.18708	5.4191	4.0661	5.53938	4.22916	6.5284	5.75308	4.10765	5.53736	4.98744	1.72882	7.9829	6.90869	3.31785	8.14005	2.5234	3.25237	2.77332	5.84534
chr13_80882087_80882287	3.39886	1.00786	6.21585	4.13051	4.42931	11.8428	1.94485	3.62869	3.41382	1.84312	1.8333	5.59413	4.92348	1.95545	11.9073	1.97383	3.68483	2.65161	1.08382	5.08262	3.32363	1.69166	2.79788	7.67077	1.02691	1.10747	2.99247	5.18645	3.54796	1.97391	4.14732	8.14005	1.68227	1.62618	3.69776	2.33813
chr13_82806565_82806765	2.26591	1.00786	1.77596	4.95661	0.885862	3.64395	3.88971	2.72152	1.70691	1.84312	3.66661	0.932354	1.23087	2.93318	1.70104	4.93457	3.68483	0.883869	3.25146	0	3.32363	1.69166	2.79788	3.83538	4.10765	1.10747	0.997489	2.59323	0.886989	0.986956	3.31785	1.48001	2.5234	0.813092	4.6222	2.33813
chr13_82983452_82983652	1.13295	4.03143	2.66393	2.47831	4.42931	2.73296	3.88971	3.62869	3.41382	3.68624	1.8333	4.66177	1.23087	3.91091	5.95364	2.96074	6.14139	4.41934	3.25146	3.04957	3.32363	3.38333	3.73051	4.79423	13.3499	5.53736	3.98995	3.45763	6.20893	2.96087	4.97678	3.70002	3.36454	4.87855	3.69776	3.5072
chr13_84211589_84211789	3.39886	5.03928	4.43989	0.826102	3.54345	4.55493	12.6415	2.72152	5.12073	4.6078	1.8333	5.59413	1.23087	2.93318	3.40208	1.97383	6.14139	0	2.16764	5.08262	2.21575	0.845832	0	0.958846	4.10765	6.64483	2.99247	4.32204	6.20893	1.97391	3.31785	0	2.5234	2.43928	2.77332	3.5072
chr13_84897158_84897365	3.39886	3.02357	4.43989	3.30441	4.42931	2.73296	13.614	1.81435	3.41382	3.68624	1.8333	4.66177	7.38523	2.93318	1.70104	3.94766	2.45655	4.41934	3.25146	6.09915	0	1.69166	1.86526	3.83538	5.13456	3.32242	4.98744	2.59323	1.77398	5.92174	1.65893	0.740005	2.5234	3.25237	3.69776	3.5072
chr13_86066635_86066920	5.66477	5.03928	7.9918	3.30441	1.77172	3.64395	1.94485	3.62869	5.97418	1.84312	4.58326	2.79706	3.69261	1.95545	14.4588	5.92149	3.68483	6.18708	3.25146	6.09915	7.75514	2.5375	4.66314	4.79423	7.18839	6.64483	4.98744	4.32204	3.54796	5.92174	4.97678	4.44003	6.72908	1.62618	1.84888	5.84534
chr13_86120423_86120623	2.26591	2.01571	3.55191	1.6522	4.42931	3.64395	2.91728	3.62869	4.26727	6.45092	7.33321	1.86471	13.5396	3.91091	1.70104	1.97383	2.45655	4.41934	1.08382	5.08262	4.43151	5.07499	0.932628	7.67077	3.08074	3.32242	3.98995	1.72882	3.54796	3.94782	1.65893	1.48001	2.5234	4.06546	1.84888	1.16907
chr13_86954216_86954498	5.66477	5.03928	4.43989	5.78271	6.20104	1.82197	5.83456	0.907174	4.26727	7.37248	2.74995	4.66177	4.92348	2.93318	5.10312	4.93457	3.68483	4.41934	2.16764	5.08262	5.53938	5.92083	0.932628	4.79423	3.08074	1.10747	2.99247	2.59323	5.32194	16.7783	4.14732	4.44003	2.5234	4.06546	5.54664	0
chr13_87451792_87452036	1.13295	3.02357	6.21585	2.47831	4.42931	5.46592	1.94485	3.62869	3.41382	1.84312	4.58326	3.72942	2.46174	2.93318	1.70104	4.93457	6.14139	5.30321	1.08382	5.08262	5.53938	7.61249	1.86526	4.79423	14.3768	1.10747	6.98242	3.45763	7.09591	2.96087	6.6357	2.96002	2.5234	3.25237	1.84888	2.33813
chr13_87779177_87779377	1.13295	1.00786	0.887978	3.30441	6.20104	4.55493	0.972427	2.72152	4.26727	3.68624	5.49991	6.52648	3.69261	1.95545	3.40208	5.92149	4.91311	4.41934	3.25146	1.01652	3.32363	3.38333	4.66314	4.79423	13.3499	4.42989	5.98493	1.72882	3.54796	2.96087	1.65893	5.92004	1.68227	3.25237	2.77332	3.5072
chr13_89834219_89834419	3.39886	5.03928	1.77596	3.30441	4.42931	0.910987	2.91728	0.907174	5.12073	4.6078	1.8333	2.79706	2.46174	2.93318	12.7578	1.97383	4.91311	5.30321	4.33528	1.01652	7.75514	4.22916	2.79788	3.83538	5.13456	1.10747	2.99247	8.64408	0.886989	4.93478	4.14732	2.22001	3.36454	3.25237	5.54664	4.67627
chr13_89876589_89876789	2.26591	0	4.43989	4.13051	2.65759	13.6648	6.80699	3.62869	3.41382	0.92156	3.66661	1.86471	1.23087	3.91091	2.55156	2.96074	2.45655	1.76774	3.25146	2.03305	3.32363	2.5375	3.73051	4.79423	3.08074	2.21494	1.99498	2.59323	2.66097	3.94782	3.31785	5.18003	3.36454	3.25237	1.84888	2.33813
chr13_92642294_92642494	2.26591	5.03928	3.55191	4.13051	3.54345	3.64395	0.972427	3.62869	1.70691	3.68624	1.8333	0.932354	0	3.91091	1.70104	0.986915	3.68483	2.65161	11.922	4.0661	2.21575	3.38333	2.79788	1.91769	3.08074	4.42989	0.997489	2.59323	0.886989	3.94782	4.14732	3.70002	6.72908	0	5.54664	2.33813
chr13_92746200_92746425	3.39886	3.02357	6.21585	4.95661	0.885862	3.64395	3.88971	4.53587	5.12073	0	2.74995	2.79706	2.46174	3.91091	2.55156	3.94766	3.68483	1.76774	3.25146	4.0661	1.10788	4.22916	2.79788	7.67077	2.05382	7.75231	14.9623	3.45763	5.32194	4.93478	3.31785	2.22001	2.5234	2.43928	2.77332	7.0144
chr13_94565171_94565371	2.26591	3.02357	6.21585	3.30441	5.31517	1.82197	1.94485	3.62869	2.56036	4.6078	2.74995	2.79706	2.46174	1.95545	1.70104	1.97383	2.45655	6.18708	1.08382	2.03305	3.32363	3.38333	1.86526	2.87654	3.08074	5.53736	11.9699	1.72882	4.43495	3.94782	3.31785	5.18003	4.20567	1.62618	4.6222	2.33813
chr13_95822722_95822928	4.53182	4.03143	6.21585	5.78271	7.0869	3.64395	5.83456	3.62869	4.26727	1.84312	5.49991	6.52648	16.0013	4.88863	2.55156	5.92149	7.36966	2.65161	2.16764	1.01652	6.64726	4.22916	3.73051	6.71192	3.08074	3.32242	1.99498	4.32204	4.43495	2.96087	4.97678	2.96002	5.04681	4.06546	4.6222	0
chr13_96488736_96488936	9.06364	4.03143	1.77596	5.78271	2.65759	7.28789	1.94485	4.53587	3.41382	0.92156	2.74995	1.86471	1.23087	3.91091	2.55156	3.94766	2.45655	2.65161	5.4191	0	3.32363	5.07499	2.79788	3.83538	14.3768	2.21494	3.98995	6.05086	3.54796	1.97391	6.6357	3.70002	5.88794	2.43928	0.92444	3.5072
chr13_98713252_98713452	3.39886	4.03143	2.66393	8.26102	2.65759	6.37691	0.972427	0.907174	4.26727	2.76468	3.66661	2.79706	3.69261	4.88863	2.55156	0	9.82622	3.53548	5.4191	6.09915	3.32363	5.07499	4.66314	3.83538	2.05382	1.10747	2.99247	5.18645	4.43495	0	5.80624	2.22001	3.36454	4.06546	4.6222	14.0288
chr13_99287810_99288010	2.26591	3.02357	5.32787	4.13051	6.20104	2.73296	1.94485	3.62869	3.41382	6.45092	5.49991	4.66177	8.6161	5.86636	0	2.96074	3.68483	1.76774	2.16764	2.03305	2.21575	5.92083	3.73051	0	2.05382	2.21494	11.9699	5.18645	5.32194	2.96087	4.14732	6.66004	5.04681	4.06546	0	5.84534
chr13_99296937_99297184	5.66477	4.03143	6.21585	7.43492	6.20104	2.73296	5.83456	2.72152	5.97418	3.68624	1.8333	0.932354	8.6161	5.86636	3.40208	3.94766	6.14139	3.53548	15.1735	5.08262	4.43151	2.5375	2.79788	4.79423	5.13456	2.21494	6.98242	2.59323	1.77398	2.96087	4.97678	2.96002	5.88794	1.62618	3.69776	5.84534
chr13_99461995_99462219	3.39886	4.03143	2.66393	5.78271	5.31517	5.46592	5.83456	3.62869	2.56036	1.84312	1.8333	5.59413	2.46174	1.95545	3.40208	5.92149	3.68483	4.41934	4.33528	7.11567	11.0788	2.5375	5.59577	2.87654	15.4037	3.32242	1.99498	4.32204	4.43495	3.94782	2.48839	6.66004	2.5234	6.50474	2.77332	5.84534
chr13_99613112_99613312	3.39886	5.03928	0.887978	3.30441	0.885862	0	4.86213	0.907174	3.41382	4.6078	6.41656	2.79706	1.23087	5.86636	2.55156	2.96074	6.14139	0	14.0897	7.11567	4.43151	4.22916	5.59577	1.91769	3.08074	7.75231	4.98744	3.45763	3.54796	5.92174	2.48839	4.44003	3.36454	5.69165	6.47108	4.67627
chr13_100741574_100741774	5.66477	5.03928	1.77596	3.30441	4.42931	3.64395	0.972427	10.8861	5.12073	2.76468	5.49991	5.59413	4.92348	3.91091	5.10312	3.94766	4.91311	6.18708	4.33528	7.11567	4.43151	2.5375	3.73051	3.83538	4.10765	13.2897	0.997489	6.05086	3.54796	4.93478	3.31785	0.740005	2.5234	3.25237	6.47108	3.5072
chr13_100964345_100964595	1.13295	6.04714	14.2077	5.78271	5.31517	3.64395	2.91728	0.907174	4.26727	1.84312	2.74995	6.52648	2.46174	3.91091	3.40208	4.93457	4.91311	4.41934	3.25146	5.08262	1.10788	5.07499	7.46102	3.83538	6.16147	0	2.99247	5.18645	3.54796	3.94782	4.97678	5.92004	2.5234	3.25237	5.54664	9.35254
chr13_103046663_103046935	5.66477	7.055	3.55191	10.7393	7.97276	10.0209	5.83456	10.8861	9.388	4.6078	5.49991	8.39119	6.15435	2.93318	15.3094	6.9084	7.36966	2.65161	6.50292	7.11567	6.64726	5.07499	7.46102	5.75308	7.18839	2.21494	0.997489	5.18645	6.20893	3.94782	4.97678	5.18003	7.57021	8.94402	12.9422	2.33813
chr13_103488478_103488678	4.53182	6.04714	0.887978	1.6522	6.20104	12.7538	2.91728	3.62869	4.26727	5.52936	9.16652	2.79706	1.23087	5.86636	4.2526	4.93457	2.45655	3.53548	4.33528	2.03305	2.21575	3.38333	3.73051	4.79423	5.13456	3.32242	3.98995	3.45763	4.43495	3.94782	3.31785	5.92004	2.5234	4.87855	5.54664	3.5072
chr13_104994435_104994635	1.13295	2.01571	3.55191	2.47831	0.885862	1.82197	1.94485	2.72152	2.56036	0.92156	1.8333	3.72942	3.69261	2.93318	4.2526	3.94766	2.45655	3.53548	2.16764	3.04957	3.32363	2.5375	0.932628	2.87654	7.18839	3.32242	7.97991	0.864408	0.886989	0.986956	2.48839	2.22001	2.5234	0.813092	1.84888	1.16907
chr13_106019551_106019751	3.39886	2.01571	3.55191	3.30441	4.42931	3.64395	3.88971	5.44304	2.56036	2.76468	2.74995	3.72942	4.92348	4.88863	0.85052	1.97383	2.45655	2.65161	2.16764	3.04957	3.32363	3.38333	0.932628	3.83538	12.3229	3.32242	5.98493	3.45763	8.86989	4.93478	2.48839	2.22001	3.36454	0.813092	2.77332	5.84534
chr13_106236653_106236853	1.13295	2.01571	6.21585	4.13051	1.77172	0	2.91728	3.62869	11.9484	4.6078	3.66661	1.86471	3.69261	6.84409	0.85052	2.96074	3.68483	4.41934	3.25146	5.08262	2.21575	2.5375	0.932628	2.87654	1.02691	2.21494	4.98744	4.32204	3.54796	5.92174	0.829463	2.96002	4.20567	6.50474	5.54664	5.84534
chr13_108406739_108406939	1.13295	6.04714	2.66393	2.47831	4.42931	4.55493	1.94485	2.72152	2.56036	4.6078	3.66661	3.72942	3.69261	2.93318	5.10312	4.93457	1.22828	3.53548	5.4191	4.0661	3.32363	0.845832	4.66314	2.87654	5.13456	3.32242	12.9674	0.864408	3.54796	3.94782	1.65893	5.18003	2.5234	3.25237	0.92444	3.5072
chr13_108449243_108449495	3.39886	3.02357	2.66393	2.47831	7.0869	3.64395	3.88971	4.53587	0	3.68624	6.41656	4.66177	6.15435	1.95545	3.40208	2.96074	7.36966	3.53548	4.33528	2.03305	3.32363	4.22916	0.932628	0	4.10765	16.6121	5.98493	6.91527	4.43495	6.90869	3.31785	2.96002	2.5234	4.06546	4.6222	2.33813
chr13_108489068_108489268	5.66477	7.055	4.43989	2.47831	2.65759	2.73296	2.91728	0	1.70691	6.45092	2.74995	4.66177	3.69261	2.93318	0	2.96074	3.68483	5.30321	3.25146	8.1322	0	1.69166	0.932628	7.67077	3.08074	12.1822	2.99247	4.32204	3.54796	3.94782	2.48839	5.18003	3.36454	1.62618	0	3.5072
chr13_111754238_111754511	2.26591	5.03928	2.66393	3.30441	2.65759	2.73296	3.88971	4.53587	3.41382	6.45092	3.66661	4.66177	3.69261	4.88863	5.95364	4.93457	6.14139	2.65161	5.4191	1.01652	4.43151	0.845832	5.59577	4.79423	5.13456	4.42989	2.99247	7.77968	7.9829	6.90869	2.48839	1.48001	5.88794	4.06546	2.77332	17.536
chr13_112283397_112283615	2.26591	1.00786	3.55191	2.47831	4.42931	2.73296	2.91728	1.81435	0	1.84312	2.74995	5.59413	6.15435	0.977727	1.70104	6.9084	3.68483	1.76774	2.16764	5.08262	1.10788	4.22916	1.86526	6.71192	3.08074	1.10747	6.98242	2.59323	0.886989	9.86956	4.97678	3.70002	2.5234	3.25237	1.84888	2.33813
chr13_113527379_113527620	6.79773	6.04714	7.10383	5.78271	8.85862	7.28789	2.91728	7.25739	5.97418	6.45092	7.33321	6.52648	8.6161	6.84409	5.10312	7.89532	3.68483	4.41934	2.16764	9.14872	6.64726	6.76666	7.46102	9.58846	2.05382	7.75231	2.99247	6.05086	3.54796	7.89565	6.6357	7.40005	10.0936	9.75711	12.0177	12.8597
chr13_114470052_114470297	2.26591	4.03143	1.77596	3.30441	3.54345	3.64395	2.91728	2.72152	6.82764	9.2156	4.58326	3.72942	2.46174	2.93318	12.7578	3.94766	3.68483	2.65161	3.25146	5.08262	5.53938	2.5375	0.932628	4.79423	1.02691	4.42989	1.99498	6.05086	3.54796	2.96087	4.97678	2.96002	2.5234	2.43928	8.31996	5.84534
chr13_114520196_114520447	2.26591	3.02357	10.6557	4.13051	3.54345	5.46592	3.88971	4.53587	5.97418	4.6078	3.66661	3.72942	11.0778	5.86636	3.40208	6.9084	4.91311	4.41934	8.67057	6.09915	2.21575	3.38333	3.73051	7.67077	5.13456	4.42989	8.9774	6.05086	6.20893	5.92174	7.46517	3.70002	3.36454	8.13092	0.92444	10.5216
chr13_114521566_114521766	2.26591	2.01571	2.66393	1.6522	3.54345	1.82197	12.6415	6.35022	2.56036	5.52936	1.8333	6.52648	8.6161	3.91091	5.10312	0.986915	4.91311	3.53548	3.25146	7.11567	2.21575	5.07499	2.79788	0.958846	4.10765	4.42989	0.997489	0.864408	5.32194	4.93478	5.80624	6.66004	4.20567	4.87855	5.54664	3.5072
chr13_114579302_114579516	3.39886	9.07071	6.21585	7.43492	9.74449	5.46592	1.94485	9.97891	3.41382	11.0587	11.9165	2.79706	6.15435	4.88863	11.0568	4.93457	3.68483	4.41934	6.50292	8.1322	4.43151	10.9958	7.46102	5.75308	9.24221	6.64483	6.98242	6.05086	6.20893	7.89565	12.4419	7.40005	6.72908	4.06546	11.0933	5.84534
chr13_115109317_115109545	16.9943	6.04714	3.55191	7.43492	4.42931	9.10987	3.88971	6.35022	7.68109	5.52936	8.24986	8.39119	8.6161	0	10.2062	4.93457	9.82622	8.83869	6.50292	4.0661	5.53938	7.61249	2.79788	6.71192	5.13456	3.32242	7.97991	8.64408	7.9829	5.92174	4.14732	8.88006	7.57021	8.13092	4.6222	5.84534
chr14_19225983_19226183	1.13295	5.03928	1.77596	3.30441	0.885862	2.73296	2.91728	0	1.70691	0	4.58326	2.79706	2.46174	0.977727	0	0	0	0	0	1.01652	1.10788	2.5375	1.86526	2.87654	2.05382	0	0.997489	0	2.66097	0	0	0.740005	2.5234	0.813092	0.92444	1.16907
chr14_19349824_19350103	5.66477	5.03928	5.32787	4.13051	4.42931	3.64395	3.88971	1.81435	4.26727	3.68624	6.41656	2.79706	4.92348	4.88863	7.65468	4.93457	4.91311	2.65161	7.58674	4.0661	14.4024	8.45832	8.39365	7.67077	2.05382	5.53736	9.97489	6.05086	1.77398	6.90869	2.48839	3.70002	5.04681	7.31783	3.69776	8.18347
chr14_19702896_19703096	4.53182	3.02357	2.66393	2.47831	10.6303	2.73296	1.94485	7.25739	1.70691	0.92156	1.8333	0.932354	2.46174	2.93318	2.55156	3.94766	1.22828	5.30321	1.08382	4.0661	2.21575	3.38333	3.73051	2.87654	1.02691	1.10747	1.99498	0.864408	0.886989	3.94782	2.48839	4.44003	4.20567	4.87855	1.84888	2.33813
chr14_19973154_19973363	1.13295	1.00786	0	0	1.77172	0.910987	0	0	0.853455	0.92156	0.916652	3.72942	1.23087	0	1.70104	0.986915	1.22828	0.883869	1.08382	0	1.10788	0	0	0.958846	3.08074	0	1.99498	0.864408	2.66097	0.986956	0	0	0	0.813092	0	0
chr14_20876613_20876813	12.4625	4.03143	3.55191	4.13051	5.31517	3.64395	2.91728	2.72152	4.26727	3.68624	3.66661	1.86471	1.23087	4.88863	2.55156	0.986915	7.36966	3.53548	2.16764	1.01652	4.43151	5.92083	5.59577	6.71192	5.13456	3.32242	1.99498	3.45763	1.77398	2.96087	1.65893	2.22001	3.36454	2.43928	4.6222	3.5072
chr14_21143705_21143906	2.26591	9.07071	5.32787	6.60881	4.42931	6.37691	2.91728	1.81435	1.70691	6.45092	3.66661	5.59413	4.92348	3.91091	5.95364	0	3.68483	5.30321	0	6.09915	3.32363	3.38333	2.79788	5.75308	5.13456	4.42989	11.9699	0.864408	4.43495	1.97391	3.31785	3.70002	3.36454	4.06546	4.6222	3.5072
chr14_21331690_21331890	2.26591	3.02357	4.43989	4.13051	2.65759	6.37691	0.972427	4.53587	6.82764	2.76468	4.58326	0.932354	1.23087	3.91091	4.2526	4.93457	3.68483	2.65161	4.33528	2.03305	5.53938	3.38333	4.66314	2.87654	2.05382	5.53736	13.9648	4.32204	4.43495	2.96087	1.65893	7.40005	5.04681	4.06546	5.54664	3.5072
chr14_21761699_21761926	3.39886	2.01571	2.66393	2.47831	4.42931	4.55493	2.91728	0.907174	4.26727	2.76468	1.8333	3.72942	3.69261	2.93318	7.65468	1.97383	8.59794	5.30321	1.08382	5.08262	0	2.5375	1.86526	2.87654	13.3499	4.42989	0.997489	3.45763	5.32194	2.96087	5.80624	2.96002	2.5234	2.43928	3.69776	5.84534
chr14_21875519_21875799	11.3295	5.03928	5.32787	0.826102	4.42931	7.28789	2.91728	1.81435	3.41382	10.1372	3.66661	4.66177	2.46174	3.91091	3.40208	8.88223	4.91311	3.53548	11.922	5.08262	1.10788	4.22916	7.46102	6.71192	18.4844	3.32242	5.98493	10.3729	5.32194	7.89565	2.48839	3.70002	8.41135	3.25237	6.47108	1.16907
chr14_22718174_22718374	6.79773	1.00786	4.43989	1.6522	6.20104	4.55493	3.88971	1.81435	3.41382	4.6078	7.33321	2.79706	6.15435	1.95545	3.40208	3.94766	4.91311	5.30321	2.16764	5.08262	2.21575	8.45832	3.73051	4.79423	4.10765	1.10747	11.9699	5.18645	2.66097	0.986956	1.65893	2.96002	4.20567	3.25237	5.54664	3.5072
chr14_23470059_23470259	6.79773	1.00786	4.43989	1.6522	2.65759	3.64395	4.86213	4.53587	12.8018	2.76468	3.66661	1.86471	4.92348	0.977727	3.40208	1.97383	3.68483	2.65161	3.25146	1.01652	1.10788	5.07499	3.73051	3.83538	4.10765	2.21494	6.98242	4.32204	4.43495	3.94782	7.46517	2.96002	3.36454	7.31783	5.54664	1.16907
chr14_24190321_24190521	5.66477	2.01571	7.10383	1.6522	0.885862	3.64395	3.88971	4.53587	0.853455	1.84312	6.41656	4.66177	8.6161	3.91091	11.0568	1.97383	2.45655	3.53548	3.25146	3.04957	4.43151	6.76666	4.66314	3.83538	3.08074	2.21494	0.997489	2.59323	1.77398	2.96087	5.80624	2.22001	5.88794	3.25237	1.84888	5.84534
chr14_24466544_24466831	1.13295	0	1.77596	0	0	0	0.972427	1.81435	0.853455	2.76468	0	0	1.23087	1.95545	0	5.92149	1.22828	0	2.16764	1.01652	0	1.69166	0.932628	1.91769	2.05382	1.10747	0	1.72882	2.66097	2.96087	3.31785	0	0	2.43928	0	2.33813
chr14_24966933_24967241	6.79773	7.055	2.66393	4.95661	2.65759	4.55493	6.80699	4.53587	4.26727	4.6078	2.74995	6.52648	7.38523	2.93318	3.40208	4.93457	2.45655	7.07095	7.58674	5.08262	3.32363	4.22916	0.932628	7.67077	5.13456	5.53736	13.9648	6.91527	8.86989	1.97391	4.97678	5.92004	5.04681	4.06546	4.6222	1.16907
chr14_31993865_31994065	2.26591	3.02357	5.32787	3.30441	6.20104	2.73296	2.91728	8.16456	3.41382	0.92156	6.41656	2.79706	2.46174	3.91091	1.70104	5.92149	1.22828	0.883869	5.4191	3.04957	4.43151	6.76666	1.86526	2.87654	7.18839	6.64483	12.9674	0.864408	4.43495	5.92174	3.31785	6.66004	3.36454	2.43928	5.54664	9.35254
chr14_32665578_32665803	5.66477	5.03928	6.21585	4.13051	1.77172	2.73296	1.94485	0.907174	0.853455	4.6078	0.916652	5.59413	6.15435	2.93318	3.40208	5.92149	1.22828	1.76774	1.08382	5.08262	4.43151	5.07499	3.73051	8.62962	10.2691	5.53736	11.9699	2.59323	5.32194	4.93478	3.31785	5.18003	2.5234	5.69165	6.47108	8.18347
chr14_34150301_34150501	3.39886	4.03143	4.43989	3.30441	2.65759	1.82197	6.80699	3.62869	2.56036	3.68624	7.33321	2.79706	3.69261	2.93318	2.55156	6.9084	2.45655	3.53548	2.16764	4.0661	3.32363	2.5375	2.79788	2.87654	2.05382	6.64483	2.99247	0	7.9829	3.94782	1.65893	3.70002	0.841135	4.06546	3.69776	15.1979
chr14_34308450_34308650	13.5955	7.055	0.887978	0.826102	1.77172	4.55493	0.972427	2.72152	5.12073	1.84312	7.33321	1.86471	3.69261	2.93318	5.10312	0	3.68483	0.883869	1.08382	5.08262	4.43151	2.5375	4.66314	6.71192	3.08074	4.42989	3.98995	2.59323	0.886989	2.96087	4.14732	1.48001	1.68227	1.62618	1.84888	3.5072
chr14_34454764_34454964	4.53182	2.01571	5.32787	4.13051	3.54345	2.73296	3.88971	6.35022	2.56036	3.68624	0.916652	1.86471	3.69261	1.95545	12.7578	5.92149	4.91311	1.76774	7.58674	2.03305	2.21575	2.5375	5.59577	4.79423	4.10765	5.53736	5.98493	4.32204	1.77398	5.92174	5.80624	2.96002	0.841135	1.62618	4.6222	1.16907
chr14_34931076_34931323	5.66477	5.03928	3.55191	2.47831	1.77172	6.37691	6.80699	1.81435	14.5087	7.37248	5.49991	6.52648	3.69261	4.88863	5.10312	9.86915	4.91311	7.95482	6.50292	3.04957	6.64726	8.45832	5.59577	4.79423	4.10765	5.53736	2.99247	6.91527	3.54796	9.86956	4.97678	2.96002	5.04681	3.25237	5.54664	5.84534
chr14_36231461_36231735	2.26591	5.03928	6.21585	1.6522	5.31517	13.6648	4.86213	6.35022	4.26727	2.76468	6.41656	3.72942	2.46174	5.86636	5.95364	1.97383	4.91311	1.76774	2.16764	4.0661	8.86302	5.92083	2.79788	3.83538	3.08074	4.42989	1.99498	3.45763	6.20893	1.97391	4.14732	2.22001	2.5234	6.50474	2.77332	2.33813
chr14_36626780_36626980	5.66477	4.03143	0.887978	2.47831	0.885862	6.37691	12.6415	3.62869	1.70691	4.6078	3.66661	6.52648	4.92348	2.93318	5.10312	2.96074	9.82622	1.76774	2.16764	4.0661	5.53938	5.92083	0.932628	2.87654	5.13456	4.42989	1.99498	4.32204	4.43495	0	1.65893	3.70002	3.36454	2.43928	0.92444	3.5072
chr14_39430283_39430483	4.53182	3.02357	2.66393	2.47831	1.77172	5.46592	0.972427	1.81435	2.56036	0.92156	1.8333	5.59413	4.92348	1.95545	0.85052	4.93457	4.91311	3.53548	5.4191	3.04957	4.43151	5.07499	2.79788	6.71192	12.3229	3.32242	1.99498	4.32204	7.09591	0	0.829463	2.96002	3.36454	3.25237	5.54664	2.33813
chr14_40107202_40107442	5.66477	1.00786	2.66393	0.826102	2.65759	2.73296	1.94485	4.53587	4.26727	3.68624	2.74995	0.932354	2.46174	2.93318	3.40208	0	1.22828	4.41934	0	2.03305	0	2.5375	2.79788	0.958846	11.296	0	1.99498	5.18645	1.77398	2.96087	1.65893	4.44003	1.68227	3.25237	6.47108	4.67627
chr14_41951637_41951865	1.13295	2.01571	1.77596	0.826102	4.42931	6.37691	5.83456	7.25739	3.41382	2.76468	2.74995	3.72942	0	2.93318	13.6083	0	3.68483	0.883869	4.33528	2.03305	3.32363	0	0.932628	1.91769	5.13456	1.10747	2.99247	2.59323	3.54796	3.94782	4.97678	1.48001	5.04681	1.62618	4.6222	3.5072
chr14_42934737_42934937	2.26591	3.02357	0.887978	4.13051	1.77172	0.910987	2.91728	5.44304	2.56036	4.6078	5.49991	3.72942	3.69261	1.95545	1.70104	2.96074	6.14139	4.41934	5.4191	4.0661	4.43151	1.69166	1.86526	4.79423	1.02691	4.42989	12.9674	0	2.66097	5.92174	3.31785	2.22001	4.20567	6.50474	1.84888	4.67627
chr14_43074685_43074888	2.26591	7.055	3.55191	4.13051	7.0869	4.55493	12.6415	4.53587	1.70691	5.52936	3.66661	0.932354	4.92348	6.84409	1.70104	3.94766	0	3.53548	4.33528	5.08262	5.53938	4.22916	4.66314	2.87654	4.10765	1.10747	1.99498	2.59323	3.54796	7.89565	3.31785	6.66004	2.5234	2.43928	0.92444	3.5072
chr14_44737129_44737408	5.66477	8.06285	4.43989	9.08712	6.20104	5.46592	2.91728	1.81435	4.26727	1.84312	0.916652	6.52648	2.46174	1.95545	1.70104	2.96074	4.91311	4.41934	14.0897	1.01652	3.32363	6.76666	1.86526	6.71192	6.16147	3.32242	2.99247	7.77968	2.66097	2.96087	1.65893	6.66004	3.36454	4.06546	2.77332	2.33813
chr14_45773843_45774079	13.5955	0	1.77596	4.13051	1.77172	0.910987	0.972427	4.53587	5.12073	1.84312	5.49991	4.66177	4.92348	1.95545	6.80416	2.96074	6.14139	4.41934	6.50292	5.08262	3.32363	5.92083	3.73051	3.83538	6.16147	6.64483	3.98995	4.32204	3.54796	0.986956	5.80624	5.92004	4.20567	2.43928	3.69776	4.67627
chr14_47378972_47379172	2.26591	5.03928	3.55191	2.47831	2.65759	2.73296	3.88971	6.35022	5.12073	9.2156	0.916652	2.79706	6.15435	2.93318	1.70104	3.94766	2.45655	4.41934	7.58674	3.04957	1.10788	3.38333	2.79788	3.83538	3.08074	14.3971	3.98995	4.32204	3.54796	5.92174	3.31785	2.22001	5.04681	0.813092	4.6222	4.67627
chr14_47592014_47592214	2.26591	2.01571	11.5437	4.13051	5.31517	3.64395	0	4.53587	3.41382	3.68624	3.66661	1.86471	2.46174	3.91091	1.70104	2.96074	2.45655	1.76774	5.4191	4.0661	3.32363	2.5375	0.932628	6.71192	7.18839	0	6.98242	4.32204	2.66097	1.97391	4.97678	2.96002	1.68227	4.87855	1.84888	3.5072
chr14_50065479_50065749	10.1966	13.1021	8.87978	10.7393	13.2879	14.5758	6.80699	12.7004	7.68109	11.0587	7.33321	18.6471	3.69261	5.86636	5.95364	10.8561	6.14139	7.07095	10.8382	8.1322	8.86302	8.45832	13.0568	7.67077	6.16147	7.75231	8.9774	5.18645	9.75688	6.90869	10.783	6.66004	6.72908	10.5702	8.31996	5.84534
chr14_50345548_50345795	4.53182	4.03143	4.43989	2.47831	7.0869	5.46592	2.91728	7.25739	4.26727	4.6078	2.74995	4.66177	7.38523	7.82182	6.80416	4.93457	1.22828	2.65161	2.16764	3.04957	6.64726	1.69166	7.46102	0.958846	5.13456	4.42989	13.9648	5.18645	3.54796	5.92174	4.97678	2.96002	5.04681	1.62618	1.84888	7.0144
chr14_50657189_50657393	1.13295	2.01571	15.0956	1.6522	0.885862	4.55493	0.972427	4.53587	2.56036	0	5.49991	3.72942	6.15435	2.93318	3.40208	2.96074	2.45655	5.30321	3.25146	2.03305	3.32363	2.5375	0.932628	9.58846	2.05382	6.64483	5.98493	6.91527	5.32194	6.90869	0.829463	2.96002	6.72908	3.25237	1.84888	2.33813
chr14_51366577_51366777	0	3.02357	3.55191	1.6522	4.42931	4.55493	0	2.72152	7.68109	4.6078	1.8333	2.79706	4.92348	2.93318	12.7578	5.92149	9.82622	3.53548	3.25146	0	4.43151	4.22916	4.66314	9.58846	1.02691	2.21494	4.98744	6.05086	6.20893	3.94782	5.80624	2.96002	1.68227	4.06546	1.84888	3.5072
chr14_53715422_53715706	2.26591	4.03143	3.55191	4.95661	7.0869	5.46592	3.88971	6.35022	5.97418	2.76468	6.41656	4.66177	2.46174	4.88863	3.40208	3.94766	4.91311	4.41934	17.3411	4.0661	4.43151	2.5375	6.5284	2.87654	3.08074	2.21494	4.98744	5.18645	9.75688	5.92174	4.14732	2.96002	2.5234	5.69165	5.54664	5.84534
chr14_54586380_54586580	0	5.03928	2.66393	0	4.42931	3.64395	3.88971	3.62869	12.8018	1.84312	1.8333	1.86471	3.69261	1.95545	3.40208	0	3.68483	2.65161	3.25146	3.04957	0	4.22916	4.66314	8.62962	2.05382	3.32242	5.98493	1.72882	2.66097	5.92174	2.48839	5.92004	5.88794	3.25237	2.77332	3.5072
chr14_54907462_54907662	7.93068	8.06285	3.55191	2.47831	6.20104	1.82197	6.80699	4.53587	9.388	1.84312	4.58326	4.66177	4.92348	5.86636	5.95364	4.93457	3.68483	0.883869	4.33528	6.09915	2.21575	5.92083	4.66314	2.87654	6.16147	15.5046	3.98995	4.32204	6.20893	3.94782	8.29463	2.22001	0.841135	5.69165	5.54664	2.33813
chr14_59577284_59577484	1.13295	4.03143	2.66393	3.30441	5.31517	3.64395	2.91728	1.81435	0	3.68624	4.58326	6.52648	3.69261	1.95545	11.9073	5.92149	3.68483	1.76774	1.08382	1.01652	3.32363	5.92083	4.66314	4.79423	3.08074	2.21494	2.99247	1.72882	5.32194	1.97391	2.48839	2.96002	4.20567	6.50474	0.92444	7.0144
chr14_61934516_61934716	1.13295	5.03928	2.66393	4.13051	0	7.28789	7.77942	5.44304	2.56036	0.92156	2.74995	2.79706	16.0013	2.93318	2.55156	5.92149	3.68483	2.65161	2.16764	7.11567	4.43151	1.69166	5.59577	1.91769	4.10765	3.32242	0.997489	1.72882	3.54796	2.96087	0.829463	2.96002	3.36454	4.06546	5.54664	4.67627
chr14_63290153_63290377	6.79773	3.02357	3.55191	0.826102	1.77172	2.73296	2.91728	0	12.8018	0	2.74995	2.79706	1.23087	1.95545	5.10312	5.92149	3.68483	3.53548	2.16764	1.01652	4.43151	2.5375	4.66314	4.79423	5.13456	0	1.99498	3.45763	3.54796	2.96087	4.97678	2.22001	0.841135	3.25237	5.54664	1.16907
chr14_63601371_63601571	2.26591	3.02357	1.77596	0.826102	2.65759	1.82197	2.91728	0	3.41382	0.92156	5.49991	2.79706	2.46174	4.88863	1.70104	4.93457	6.14139	5.30321	4.33528	7.11567	2.21575	6.76666	3.73051	2.87654	5.13456	1.10747	11.9699	0.864408	6.20893	4.93478	4.97678	2.22001	1.68227	5.69165	2.77332	5.84534
chr14_64951253_64951464	2.26591	1.00786	4.43989	3.30441	7.0869	3.64395	3.88971	0.907174	5.12073	1.84312	3.66661	5.59413	4.92348	3.91091	1.70104	3.94766	3.68483	4.41934	6.50292	3.04957	1.10788	2.5375	3.73051	2.87654	5.13456	4.42989	2.99247	3.45763	0.886989	1.97391	3.31785	3.70002	2.5234	4.06546	3.69776	15.1979
chr14_65040261_65040483	2.26591	6.04714	3.55191	2.47831	7.0869	1.82197	7.77942	2.72152	2.56036	5.52936	4.58326	1.86471	0	2.93318	5.10312	1.97383	4.91311	4.41934	3.25146	4.0661	3.32363	1.69166	4.66314	2.87654	15.4037	3.32242	3.98995	5.18645	2.66097	1.97391	4.97678	2.96002	5.04681	2.43928	5.54664	4.67627
chr14_71147933_71148198	3.39886	5.03928	4.43989	4.13051	2.65759	6.37691	4.86213	18.1435	1.70691	1.84312	2.74995	4.66177	2.46174	3.91091	3.40208	1.97383	7.36966	7.07095	4.33528	2.03305	3.32363	6.76666	0.932628	6.71192	2.05382	4.42989	2.99247	4.32204	4.43495	4.93478	5.80624	8.14005	3.36454	3.25237	5.54664	3.5072
chr14_71332908_71333108	2.26591	2.01571	3.55191	3.30441	4.42931	3.64395	3.88971	0.907174	5.97418	2.76468	4.58326	4.66177	0	2.93318	5.95364	3.94766	13.511	4.41934	13.0058	8.1322	3.32363	2.5375	3.73051	4.79423	5.13456	6.64483	4.98744	7.77968	2.66097	2.96087	3.31785	3.70002	3.36454	2.43928	4.6222	4.67627
chr14_71635460_71635680	5.66477	2.01571	4.43989	1.6522	2.65759	1.82197	4.86213	8.16456	3.41382	1.84312	5.49991	3.72942	3.69261	1.95545	3.40208	0.986915	6.14139	2.65161	5.4191	3.04957	1.10788	3.38333	4.66314	4.79423	4.10765	1.10747	13.9648	8.64408	3.54796	0.986956	2.48839	2.22001	0.841135	4.87855	0.92444	3.5072
chr14_74260408_74260682	2.26591	3.02357	0.887978	3.30441	5.31517	1.82197	3.88971	2.72152	4.26727	4.6078	4.58326	2.79706	3.69261	3.91091	3.40208	3.94766	1.22828	3.53548	5.4191	7.11567	5.53938	4.22916	6.5284	3.83538	2.05382	4.42989	5.98493	4.32204	9.75688	2.96087	3.31785	4.44003	3.36454	3.25237	5.54664	17.536
chr14_74342717_74343048	4.53182	6.04714	3.55191	4.95661	2.65759	4.55493	6.80699	9.07174	6.82764	2.76468	2.74995	4.66177	7.38523	9.77727	5.95364	4.93457	3.68483	8.83869	2.16764	6.09915	5.53938	5.92083	0	7.67077	5.13456	3.32242	15.9598	6.91527	3.54796	2.96087	4.97678	2.96002	2.5234	4.06546	7.39552	3.5072
chr14_75419892_75420092	2.26591	1.00786	0	4.13051	6.20104	5.46592	1.94485	2.72152	3.41382	5.52936	2.74995	2.79706	0	4.88863	1.70104	1.97383	2.45655	4.41934	3.25146	4.0661	1.10788	4.22916	2.79788	3.83538	2.05382	3.32242	12.9674	0.864408	2.66097	1.97391	4.14732	2.96002	4.20567	3.25237	4.6222	4.67627
chr14_76026798_76026998	3.39886	1.00786	3.55191	4.13051	2.65759	12.7538	0.972427	4.53587	1.70691	0.92156	3.66661	4.66177	3.69261	1.95545	4.2526	6.9084	3.68483	6.18708	1.08382	2.03305	2.21575	6.76666	6.5284	1.91769	4.10765	5.53736	3.98995	0	1.77398	2.96087	4.14732	5.92004	1.68227	6.50474	0.92444	1.16907
chr14_76305640_76305866	5.66477	0	1.77596	6.60881	3.54345	3.64395	2.91728	2.72152	3.41382	3.68624	3.66661	5.59413	2.46174	5.86636	7.65468	2.96074	1.22828	6.18708	6.50292	1.01652	13.2945	5.07499	2.79788	6.71192	6.16147	3.32242	2.99247	2.59323	4.43495	5.92174	4.97678	3.70002	5.04681	3.25237	4.6222	2.33813
chr14_80966803_80967003	5.66477	1.00786	0.887978	5.78271	6.20104	2.73296	3.88971	2.72152	4.26727	5.52936	5.49991	4.66177	2.46174	5.86636	1.70104	6.9084	3.68483	1.76774	6.50292	4.0661	1.10788	6.76666	4.66314	5.75308	13.3499	0	2.99247	2.59323	7.09591	0.986956	0	0.740005	8.41135	3.25237	6.47108	5.84534
chr14_81135888_81136107	2.26591	5.03928	7.9918	9.08712	3.54345	4.55493	0	1.81435	5.12073	7.37248	5.49991	4.66177	2.46174	4.88863	3.40208	1.97383	4.91311	7.07095	4.33528	2.03305	15.5103	5.92083	2.79788	0.958846	5.13456	3.32242	3.98995	6.05086	1.77398	5.92174	4.14732	2.96002	0	4.87855	4.6222	5.84534
chr14_82380124_82380324	3.39886	2.01571	4.43989	3.30441	5.31517	4.55493	2.91728	6.35022	2.56036	1.84312	4.58326	3.72942	7.38523	0.977727	3.40208	1.97383	1.22828	1.76774	3.25146	3.04957	13.2945	3.38333	8.39365	5.75308	2.05382	2.21494	0.997489	4.32204	2.66097	7.89565	3.31785	3.70002	3.36454	4.87855	0.92444	2.33813
chr14_83555674_83555913	1.13295	3.02357	7.9918	4.13051	5.31517	4.55493	4.86213	4.53587	0.853455	2.76468	6.41656	3.72942	2.46174	4.88863	5.95364	2.96074	6.14139	2.65161	4.33528	6.09915	15.5103	4.22916	4.66314	5.75308	3.08074	4.42989	2.99247	5.18645	1.77398	5.92174	6.6357	3.70002	3.36454	3.25237	8.31996	2.33813
chr14_84262063_84262304	2.26591	5.03928	2.66393	4.13051	0.885862	5.46592	4.86213	3.62869	5.97418	2.76468	2.74995	5.59413	2.46174	1.95545	2.55156	3.94766	2.45655	3.53548	4.33528	2.03305	0	5.07499	6.5284	4.79423	13.3499	5.53736	8.9774	5.18645	6.20893	3.94782	4.97678	5.92004	3.36454	1.62618	1.84888	4.67627
chr14_88077299_88077499	1.13295	5.03928	3.55191	4.13051	3.54345	0.910987	4.86213	2.72152	2.56036	1.84312	3.66661	11.1883	1.23087	3.91091	4.2526	1.97383	4.91311	3.53548	4.33528	2.03305	4.43151	2.5375	2.79788	3.83538	3.08074	3.32242	3.98995	6.05086	7.09591	6.90869	2.48839	5.18003	5.88794	1.62618	1.84888	5.84534
chr14_89191000_89191232	3.39886	5.03928	1.77596	3.30441	6.20104	4.55493	2.91728	3.62869	4.26727	7.37248	4.58326	5.59413	16.0013	2.93318	8.5052	6.9084	2.45655	3.53548	2.16764	2.03305	1.10788	4.22916	2.79788	3.83538	5.13456	1.10747	5.98493	6.05086	4.43495	5.92174	5.80624	6.66004	1.68227	4.06546	4.6222	5.84534
chr14_89481080_89481280	3.39886	3.02357	9.76776	3.30441	3.54345	1.82197	0	4.53587	5.97418	2.76468	8.24986	5.59413	3.69261	1.95545	2.55156	1.97383	1.22828	5.30321	6.50292	3.04957	1.10788	0	2.79788	4.79423	5.13456	6.64483	12.9674	5.18645	0	6.90869	2.48839	5.92004	8.41135	4.06546	4.6222	3.5072
chr14_89676810_89677011	2.26591	1.00786	4.43989	3.30441	1.77172	6.37691	13.614	2.72152	2.56036	6.45092	0.916652	1.86471	4.92348	0.977727	4.2526	4.93457	2.45655	0.883869	3.25146	2.03305	2.21575	2.5375	3.73051	1.91769	4.10765	4.42989	5.98493	1.72882	4.43495	7.89565	4.14732	1.48001	3.36454	4.87855	4.6222	2.33813
chr14_90682934_90683134	3.39886	6.04714	7.9918	4.95661	4.42931	2.73296	3.88971	0	0.853455	3.68624	1.8333	2.79706	4.92348	3.91091	3.40208	2.96074	7.36966	4.41934	11.922	2.03305	2.21575	5.92083	1.86526	3.83538	4.10765	3.32242	2.99247	1.72882	4.43495	5.92174	5.80624	2.96002	2.5234	4.87855	1.84888	4.67627
chr14_90850497_90850731	4.53182	9.07071	4.43989	6.60881	7.0869	2.73296	2.91728	1.81435	0.853455	2.76468	6.41656	8.39119	2.46174	4.88863	2.55156	4.93457	3.68483	4.41934	5.4191	3.04957	5.53938	6.76666	1.86526	5.75308	3.08074	16.6121	2.99247	4.32204	6.20893	1.97391	3.31785	2.22001	5.88794	1.62618	6.47108	4.67627
chr14_97175357_97175626	4.53182	1.00786	0	1.6522	3.54345	1.82197	1.94485	3.62869	1.70691	11.0587	2.74995	1.86471	0	1.95545	0.85052	2.96074	4.91311	1.76774	3.25146	1.01652	2.21575	5.92083	2.79788	3.83538	3.08074	2.21494	2.99247	2.59323	2.66097	4.93478	3.31785	3.70002	2.5234	1.62618	5.54664	3.5072
chr14_99732863_99733084	2.26591	6.04714	7.10383	3.30441	7.0869	5.46592	3.88971	3.62869	8.53455	5.52936	3.66661	4.66177	6.15435	4.88863	10.2062	1.97383	6.14139	3.53548	17.3411	9.14872	1.10788	6.76666	3.73051	5.75308	5.13456	3.32242	5.98493	2.59323	3.54796	6.90869	4.97678	3.70002	7.57021	4.87855	2.77332	3.5072
chr14_101061530_101061730	4.53182	3.02357	4.43989	3.30441	6.20104	4.55493	3.88971	4.53587	4.26727	4.6078	10.0832	0.932354	0	3.91091	2.55156	1.97383	2.45655	2.65161	3.25146	3.04957	2.21575	5.92083	4.66314	5.75308	0	2.21494	11.9699	6.05086	1.77398	2.96087	2.48839	2.96002	4.20567	4.06546	4.6222	2.33813
chr14_101952506_101952722	4.53182	2.01571	1.77596	0.826102	5.31517	2.73296	3.88971	5.44304	2.56036	6.45092	4.58326	14.9177	4.92348	2.93318	3.40208	3.94766	7.36966	3.53548	4.33528	6.09915	5.53938	5.07499	2.79788	2.87654	7.18839	3.32242	1.99498	4.32204	4.43495	2.96087	4.14732	0.740005	3.36454	3.25237	4.6222	4.67627
chr14_102449021_102449221	3.39886	4.03143	4.43989	2.47831	6.20104	3.64395	1.94485	1.81435	5.12073	4.6078	5.49991	13.9853	3.69261	7.82182	2.55156	3.94766	2.45655	3.53548	8.67057	4.0661	3.32363	2.5375	2.79788	2.87654	2.05382	1.10747	3.98995	1.72882	5.32194	1.97391	4.97678	5.18003	4.20567	4.06546	6.47108	1.16907
chr14_102829252_102829516	2.26591	10.0786	7.10383	6.60881	3.54345	7.28789	5.83456	3.62869	5.12073	9.2156	11.9165	7.45883	3.69261	8.79954	16.1599	8.88223	14.7393	7.95482	8.67057	6.09915	5.53938	4.22916	3.73051	4.79423	5.13456	12.1822	5.98493	4.32204	2.66097	5.92174	9.12409	9.62006	6.72908	4.87855	5.54664	7.0144
chr14_105292289_105292570	5.66477	1.00786	2.66393	4.13051	7.0869	5.46592	3.88971	7.25739	0.853455	9.2156	5.49991	16.7824	4.92348	5.86636	3.40208	15.7906	7.36966	2.65161	6.50292	4.0661	3.32363	4.22916	2.79788	6.71192	4.10765	5.53736	0.997489	6.05086	4.43495	1.97391	3.31785	4.44003	2.5234	5.69165	1.84888	5.84534
chr14_105487519_105487844	5.66477	9.07071	5.32787	26.4353	13.2879	7.28789	11.6691	12.7004	12.8018	18.4312	13.7498	11.1883	8.6161	8.79954	11.9073	10.8561	15.9676	8.83869	7.58674	11.1818	11.0788	5.92083	7.46102	5.75308	14.3768	12.1822	6.98242	6.05086	14.1918	7.89565	7.46517	14.0601	14.2993	4.06546	10.1688	4.67627
chr14_106663028_106663298	1.13295	0	0	0	0	0	0.972427	0	1.70691	0.92156	1.8333	0.932354	1.23087	2.93318	1.70104	0.986915	1.22828	0	0	0	0	0.845832	0.932628	0	0	1.10747	0	0	0	0	0	0.740005	0	0	0	1.16907
chr14_107172219_107172462	6.79773	8.06285	3.55191	8.26102	7.0869	7.28789	5.83456	6.35022	2.56036	7.37248	7.33321	2.79706	2.46174	4.88863	1.70104	3.94766	4.91311	6.18708	5.4191	8.1322	4.43151	4.22916	4.66314	2.87654	15.4037	4.42989	4.98744	6.05086	3.54796	1.97391	4.97678	5.92004	9.25248	6.50474	4.6222	8.18347
chr15_22831398_22831640	5.66477	2.01571	3.55191	1.6522	5.31517	6.37691	10.6967	1.81435	6.82764	4.6078	4.58326	2.79706	0	4.88863	1.70104	4.93457	7.36966	2.65161	2.16764	6.09915	4.43151	4.22916	5.59577	0.958846	4.10765	6.64483	3.98995	7.77968	3.54796	5.92174	2.48839	6.66004	6.72908	5.69165	2.77332	2.33813
chr15_24451040_24451279	2.26591	5.03928	3.55191	3.30441	2.65759	7.28789	3.88971	2.72152	2.56036	2.76468	1.8333	3.72942	4.92348	2.93318	0.85052	7.89532	3.68483	6.18708	15.1735	6.09915	5.53938	6.76666	1.86526	3.83538	4.10765	2.21494	2.99247	3.45763	6.20893	4.93478	4.14732	2.96002	5.04681	2.43928	2.77332	1.16907
chr15_25142408_25142635	3.39886	3.02357	4.43989	0	4.42931	5.46592	3.88971	2.72152	2.56036	5.52936	1.8333	1.86471	4.92348	2.93318	4.2526	2.96074	1.22828	3.53548	5.4191	2.03305	3.32363	5.07499	4.66314	2.87654	15.4037	2.21494	3.98995	4.32204	3.54796	2.96087	4.97678	2.22001	0	1.62618	5.54664	2.33813
chr15_26467606_26467806	14.7284	5.03928	1.77596	0.826102	2.65759	3.64395	3.88971	0	4.26727	5.52936	3.66661	2.79706	2.46174	0.977727	1.70104	5.92149	1.22828	0.883869	0	4.0661	2.21575	5.92083	5.59577	2.87654	1.02691	1.10747	4.98744	6.91527	3.54796	1.97391	3.31785	2.96002	2.5234	2.43928	1.84888	4.67627
chr15_26781939_26782139	5.66477	6.04714	0.887978	2.47831	3.54345	5.46592	1.94485	2.72152	2.56036	1.84312	3.66661	1.86471	4.92348	3.91091	11.9073	2.96074	4.91311	4.41934	5.4191	7.11567	1.10788	5.07499	1.86526	3.83538	6.16147	7.75231	4.98744	5.18645	3.54796	6.90869	4.97678	3.70002	5.88794	4.06546	2.77332	3.5072
chr15_26893368_26893568	3.39886	3.02357	7.10383	1.6522	1.77172	2.73296	3.88971	2.72152	5.12073	5.52936	0.916652	2.79706	2.46174	4.88863	5.10312	2.96074	2.45655	3.53548	3.25146	4.0661	14.4024	1.69166	1.86526	4.79423	2.05382	4.42989	3.98995	1.72882	0.886989	3.94782	3.31785	1.48001	3.36454	4.87855	1.84888	2.33813
chr15_28085104_28085304	13.5955	4.03143	1.77596	4.13051	1.77172	0.910987	5.83456	1.81435	4.26727	1.84312	2.74995	3.72942	3.69261	3.91091	2.55156	4.93457	2.45655	4.41934	2.16764	5.08262	4.43151	2.5375	8.39365	3.83538	4.10765	4.42989	0.997489	1.72882	1.77398	0.986956	3.31785	2.22001	5.88794	5.69165	7.39552	1.16907
chr15_32078223_32078423	2.26591	9.07071	2.66393	2.47831	4.42931	4.55493	3.88971	1.81435	3.41382	4.6078	2.74995	5.59413	17.2322	1.95545	3.40208	1.97383	3.68483	4.41934	3.25146	6.09915	3.32363	4.22916	4.66314	2.87654	3.08074	3.32242	0.997489	1.72882	6.20893	0	2.48839	2.22001	1.68227	1.62618	4.6222	4.67627
chr15_36411860_36412060	2.26591	4.03143	4.43989	1.6522	3.54345	3.64395	0.972427	1.81435	2.56036	1.84312	3.66661	1.86471	1.23087	1.95545	3.40208	2.96074	2.45655	1.76774	1.08382	2.03305	2.21575	3.38333	0.932628	1.91769	1.02691	4.42989	1.99498	0	0.886989	1.97391	3.31785	1.48001	2.5234	2.43928	2.77332	3.5072
chr15_37095188_37095388	0	1.00786	2.66393	1.6522	2.65759	6.37691	2.91728	2.72152	3.41382	1.84312	5.49991	4.66177	4.92348	4.88863	5.10312	4.93457	2.45655	3.53548	2.16764	1.01652	3.32363	3.38333	0.932628	0.958846	4.10765	1.10747	11.9699	4.32204	6.20893	0	1.65893	2.96002	2.5234	2.43928	1.84888	5.84534
chr15_37251042_37251242	1.13295	2.01571	3.55191	3.30441	2.65759	6.37691	4.86213	3.62869	2.56036	7.37248	2.74995	7.45883	13.5396	0.977727	1.70104	1.97383	2.45655	5.30321	2.16764	4.0661	5.53938	7.61249	5.59577	0	6.16147	1.10747	4.98744	6.05086	3.54796	8.88261	3.31785	1.48001	5.04681	7.31783	1.84888	2.33813
chr15_39773010_39773222	1.13295	3.02357	2.66393	5.78271	2.65759	5.46592	2.91728	4.53587	1.70691	3.68624	1.8333	4.66177	0	9.77727	5.95364	2.96074	0	0.883869	2.16764	3.04957	17.726	5.92083	1.86526	5.75308	4.10765	2.21494	0	4.32204	6.20893	3.94782	4.14732	6.66004	2.5234	3.25237	1.84888	4.67627
chr15_41047374_41047574	4.53182	4.03143	5.32787	1.6522	5.31517	6.37691	9.72427	5.44304	7.68109	4.6078	7.33321	4.66177	3.69261	7.82182	12.7578	5.92149	4.91311	6.18708	3.25146	4.0661	3.32363	5.92083	6.5284	7.67077	8.2153	6.64483	4.98744	3.45763	7.09591	6.90869	7.46517	6.66004	3.36454	7.31783	7.39552	4.67627
chr15_42121076_42121276	3.39886	3.02357	1.77596	0	7.0869	3.64395	7.77942	3.62869	10.2415	0.92156	5.49991	7.45883	3.69261	2.93318	2.55156	2.96074	6.14139	5.30321	3.25146	9.14872	3.32363	2.5375	2.79788	4.79423	5.13456	3.32242	4.98744	3.45763	1.77398	3.94782	4.14732	7.40005	5.04681	2.43928	4.6222	4.67627
chr15_42185560_42185762	3.39886	4.03143	3.55191	7.43492	3.54345	2.73296	1.94485	2.72152	4.26727	6.45092	4.58326	2.79706	0	1.95545	5.95364	1.97383	3.68483	5.30321	1.08382	3.04957	2.21575	2.5375	5.59577	1.91769	3.08074	0	6.98242	3.45763	1.77398	1.97391	1.65893	1.48001	4.20567	4.87855	4.6222	16.3669
chr15_42186972_42187172	13.5955	7.055	4.43989	3.30441	5.31517	2.73296	1.94485	7.25739	5.97418	10.1372	5.49991	10.2559	7.38523	6.84409	2.55156	4.93457	4.91311	2.65161	3.25146	3.04957	6.64726	5.92083	2.79788	2.87654	5.13456	1.10747	0.997489	2.59323	2.66097	0.986956	5.80624	2.96002	3.36454	5.69165	4.6222	2.33813
chr15_43438157_43438445	2.26591	5.03928	4.43989	6.60881	6.20104	4.55493	2.91728	3.62869	5.12073	6.45092	3.66661	9.32354	9.84697	2.93318	3.40208	2.96074	2.45655	6.18708	7.58674	4.0661	5.53938	6.76666	6.5284	5.75308	1.02691	6.64483	15.9598	4.32204	8.86989	0.986956	6.6357	4.44003	5.88794	7.31783	4.6222	7.0144
chr15_44958739_44958966	5.66477	5.03928	2.66393	4.95661	1.77172	2.73296	13.614	2.72152	3.41382	5.52936	4.58326	1.86471	6.15435	1.95545	6.80416	0.986915	6.14139	4.41934	3.25146	3.04957	3.32363	5.92083	0	0	3.08074	4.42989	1.99498	6.05086	0.886989	5.92174	2.48839	5.92004	2.5234	2.43928	5.54664	8.18347
chr15_45147608_45147808	3.39886	0	0.887978	0	1.77172	1.82197	0	0.907174	1.70691	1.84312	0	0.932354	4.92348	2.93318	0.85052	0.986915	2.45655	1.76774	0	1.01652	1.10788	2.5375	0.932628	1.91769	3.08074	3.32242	0.997489	2.59323	2.66097	1.97391	0.829463	0	2.5234	2.43928	2.77332	0
chr15_45315419_45315715	7.93068	6.04714	6.21585	4.13051	3.54345	6.37691	13.614	6.35022	5.97418	6.45092	3.66661	0.932354	4.92348	2.93318	3.40208	9.86915	2.45655	7.07095	9.75439	5.08262	8.86302	7.61249	4.66314	1.91769	7.18839	1.10747	3.98995	6.05086	3.54796	0.986956	7.46517	4.44003	8.41135	4.87855	5.54664	8.18347
chr15_46687636_46687897	5.66477	4.03143	6.21585	2.47831	2.65759	7.28789	1.94485	1.81435	5.12073	6.45092	3.66661	2.79706	1.23087	7.82182	3.40208	18.7514	2.45655	5.30321	4.33528	5.08262	7.75514	6.76666	2.79788	2.87654	1.02691	3.32242	4.98744	4.32204	7.9829	1.97391	2.48839	1.48001	4.20567	1.62618	7.39552	7.0144
chr15_47626025_47626243	4.53182	6.04714	7.10383	1.6522	5.31517	3.64395	13.614	2.72152	3.41382	1.84312	7.33321	0.932354	6.15435	4.88863	2.55156	5.92149	3.68483	3.53548	1.08382	4.0661	2.21575	5.92083	2.79788	4.79423	3.08074	2.21494	4.98744	1.72882	3.54796	3.94782	0.829463	3.70002	3.36454	2.43928	4.6222	0
chr15_48078201_48078469	5.66477	2.01571	1.77596	2.47831	3.54345	5.46592	1.94485	5.44304	5.97418	4.6078	1.8333	2.79706	6.15435	1.95545	1.70104	8.88223	7.36966	4.41934	1.08382	5.08262	3.32363	4.22916	3.73051	5.75308	5.13456	18.827	3.98995	5.18645	5.32194	6.90869	6.6357	2.96002	1.68227	6.50474	2.77332	5.84534
chr15_48947454_48947682	3.39886	7.055	3.55191	1.6522	4.42931	7.28789	2.91728	3.62869	15.3622	5.52936	6.41656	0.932354	4.92348	0.977727	2.55156	2.96074	7.36966	2.65161	1.08382	7.11567	6.64726	5.07499	2.79788	2.87654	3.08074	1.10747	3.98995	4.32204	3.54796	0.986956	4.97678	4.44003	3.36454	2.43928	4.6222	5.84534
chr15_48960690_48960914	2.26591	2.01571	2.66393	1.6522	6.20104	4.55493	1.94485	2.72152	6.82764	1.84312	2.74995	7.45883	3.69261	0.977727	5.95364	2.96074	6.14139	0	4.33528	7.11567	0	1.69166	3.73051	5.75308	5.13456	3.32242	11.9699	0.864408	6.20893	2.96087	4.97678	6.66004	3.36454	4.87855	0	4.67627
chr15_50089962_50090162	1.13295	4.03143	7.10383	4.13051	7.0869	2.73296	11.6691	2.72152	2.56036	6.45092	5.49991	4.66177	3.69261	3.91091	2.55156	3.94766	4.91311	3.53548	1.08382	0	2.21575	4.22916	0.932628	2.87654	5.13456	4.42989	4.98744	2.59323	0.886989	4.93478	1.65893	3.70002	2.5234	4.06546	3.69776	2.33813
chr15_52377772_52377972	4.53182	5.03928	2.66393	6.60881	2.65759	4.55493	8.75184	5.44304	1.70691	6.45092	4.58326	3.72942	2.46174	5.86636	4.2526	2.96074	2.45655	9.72256	4.33528	4.0661	4.43151	0.845832	4.66314	2.87654	4.10765	4.42989	12.9674	0.864408	3.54796	4.93478	3.31785	5.18003	3.36454	1.62618	4.6222	5.84534
chr15_53827150_53827380	4.53182	2.01571	2.66393	4.13051	4.42931	3.64395	1.94485	0	5.12073	2.76468	1.8333	3.72942	4.92348	3.91091	3.40208	5.92149	1.22828	5.30321	14.0897	4.0661	4.43151	1.69166	8.39365	4.79423	5.13456	0	3.98995	5.18645	3.54796	0.986956	4.14732	2.96002	5.88794	6.50474	3.69776	3.5072
chr15_56869853_56870053	2.26591	3.02357	0	4.13051	7.0869	6.37691	7.77942	2.72152	2.56036	0.92156	4.58326	4.66177	6.15435	4.88863	5.10312	0	4.91311	5.30321	5.4191	1.01652	3.32363	4.22916	3.73051	5.75308	3.08074	6.64483	1.99498	4.32204	4.43495	3.94782	2.48839	5.18003	3.36454	4.87855	4.6222	15.1979
chr15_57105318_57105579	6.79773	2.01571	1.77596	0.826102	5.31517	6.37691	10.6967	4.53587	5.97418	9.2156	3.66661	4.66177	6.15435	0.977727	2.55156	5.92149	6.14139	7.07095	16.2573	3.04957	4.43151	4.22916	2.79788	5.75308	3.08074	2.21494	4.98744	6.05086	2.66097	7.89565	2.48839	4.44003	2.5234	3.25237	5.54664	2.33813
chr15_57301987_57302187	2.26591	6.04714	7.10383	4.13051	2.65759	2.73296	0.972427	7.25739	3.41382	2.76468	4.58326	6.52648	3.69261	8.79954	1.70104	2.96074	4.91311	4.41934	4.33528	4.0661	14.4024	4.22916	5.59577	4.79423	6.16147	2.21494	0.997489	2.59323	3.54796	5.92174	1.65893	1.48001	4.20567	8.13092	3.69776	4.67627
chr15_57783588_57783788	7.93068	2.01571	2.66393	1.6522	4.42931	1.82197	12.6415	0.907174	0.853455	7.37248	2.74995	5.59413	2.46174	1.95545	3.40208	1.97383	2.45655	1.76774	1.08382	4.0661	4.43151	3.38333	4.66314	3.83538	4.10765	1.10747	1.99498	0.864408	2.66097	3.94782	2.48839	4.44003	3.36454	2.43928	1.84888	2.33813
chr15_62405808_62406018	3.39886	3.02357	2.66393	4.13051	2.65759	1.82197	3.88971	2.72152	2.56036	2.76468	5.49991	6.52648	1.23087	5.86636	14.4588	1.97383	2.45655	3.53548	4.33528	1.01652	2.21575	3.38333	0.932628	3.83538	3.08074	3.32242	3.98995	0.864408	4.43495	0.986956	4.14732	4.44003	3.36454	1.62618	2.77332	2.33813
chr15_62939849_62940049	7.93068	4.03143	3.55191	4.13051	3.54345	6.37691	3.88971	5.44304	0.853455	4.6078	2.74995	0.932354	6.15435	5.86636	2.55156	7.89532	6.14139	3.53548	1.08382	0	14.4024	3.38333	5.59577	4.79423	4.10765	3.32242	1.99498	2.59323	1.77398	1.97391	3.31785	3.70002	2.5234	3.25237	4.6222	3.5072
chr15_64188620_64188820	4.53182	4.03143	3.55191	1.6522	2.65759	4.55493	3.88971	7.25739	5.12073	3.68624	2.74995	4.66177	2.46174	6.84409	2.55156	2.96074	1.22828	3.53548	14.0897	6.09915	4.43151	5.92083	4.66314	1.91769	2.05382	5.53736	5.98493	4.32204	5.32194	7.89565	5.80624	5.18003	8.41135	1.62618	2.77332	4.67627
chr15_64799849_64800092	7.93068	4.03143	0.887978	1.6522	5.31517	4.55493	1.94485	5.44304	5.97418	3.68624	2.74995	3.72942	0	5.86636	14.4588	0.986915	3.68483	4.41934	2.16764	4.0661	4.43151	5.07499	3.73051	4.79423	11.296	4.42989	1.99498	5.18645	4.43495	6.90869	4.14732	5.18003	2.5234	5.69165	6.47108	8.18347
chr15_65787214_65787414	3.39886	5.03928	0.887978	4.13051	4.42931	5.46592	3.88971	2.72152	5.12073	3.68624	3.66661	2.79706	2.46174	2.93318	5.10312	2.96074	3.68483	6.18708	4.33528	2.03305	1.10788	4.22916	3.73051	5.75308	13.3499	1.10747	1.99498	3.45763	3.54796	6.90869	4.14732	0.740005	4.20567	7.31783	2.77332	2.33813
chr15_68266718_68266962	4.53182	3.02357	4.43989	4.13051	4.42931	4.55493	4.86213	3.62869	1.70691	0.92156	4.58326	5.59413	3.69261	5.86636	1.70104	7.89532	0	4.41934	2.16764	2.03305	2.21575	3.38333	5.59577	17.2592	4.10765	4.42989	0.997489	4.32204	2.66097	1.97391	4.14732	2.22001	4.20567	8.94402	7.39552	3.5072
chr15_68547544_68547744	5.66477	2.01571	2.66393	4.95661	6.20104	1.82197	1.94485	1.81435	3.41382	2.76468	4.58326	5.59413	2.46174	2.93318	4.2526	8.88223	9.82622	13.258	7.58674	5.08262	2.21575	3.38333	4.66314	1.91769	7.18839	5.53736	5.98493	3.45763	2.66097	1.97391	2.48839	5.92004	3.36454	5.69165	5.54664	2.33813
chr15_68721159_68721359	4.53182	5.03928	2.66393	2.47831	6.20104	0.910987	0.972427	3.62869	4.26727	0.92156	0.916652	0.932354	2.46174	1.95545	1.70104	4.93457	2.45655	2.65161	4.33528	3.04957	14.4024	5.07499	5.59577	2.87654	1.02691	3.32242	2.99247	6.05086	2.66097	3.94782	4.97678	8.88006	4.20567	6.50474	2.77332	1.16907
chr15_69473079_69473279	1.13295	3.02357	5.32787	3.30441	4.42931	1.82197	3.88971	2.72152	5.12073	3.68624	6.41656	1.86471	4.92348	4.88863	0	4.93457	1.22828	2.65161	3.25146	5.08262	15.5103	1.69166	2.79788	4.79423	8.2153	0	5.98493	6.91527	4.43495	3.94782	2.48839	1.48001	5.88794	6.50474	2.77332	2.33813
chr15_70585918_70586167	1.13295	4.03143	1.77596	4.13051	3.54345	1.82197	1.94485	5.44304	3.41382	3.68624	6.41656	3.72942	4.92348	8.79954	5.10312	4.93457	3.68483	7.07095	3.25146	3.04957	1.10788	5.92083	3.73051	5.75308	14.3768	3.32242	2.99247	4.32204	2.66097	1.97391	2.48839	5.18003	2.5234	2.43928	8.31996	3.5072
chr15_70811646_70811846	6.79773	3.02357	4.43989	5.78271	3.54345	3.64395	2.91728	3.62869	12.8018	3.68624	4.58326	1.86471	4.92348	9.77727	5.10312	3.94766	2.45655	3.53548	3.25146	2.03305	3.32363	1.69166	5.59577	5.75308	3.08074	1.10747	4.98744	4.32204	4.43495	4.93478	6.6357	2.22001	0.841135	3.25237	6.47108	5.84534
chr15_71621691_71621891	2.26591	4.03143	2.66393	0	0.885862	7.28789	2.91728	5.44304	3.41382	5.52936	2.74995	13.053	0	1.95545	2.55156	6.9084	2.45655	3.53548	4.33528	1.01652	2.21575	1.69166	7.46102	3.83538	2.05382	1.10747	4.98744	6.05086	3.54796	3.94782	4.14732	5.18003	2.5234	1.62618	4.6222	9.35254
chr15_73046803_73047021	6.79773	3.02357	1.77596	3.30441	4.42931	8.19888	13.614	6.35022	4.26727	4.6078	4.58326	4.66177	4.92348	0.977727	1.70104	2.96074	3.68483	2.65161	4.33528	3.04957	3.32363	4.22916	4.66314	3.83538	2.05382	1.10747	1.99498	0	2.66097	2.96087	6.6357	2.22001	1.68227	2.43928	0.92444	3.5072
chr15_74910391_74910591	7.93068	7.055	5.32787	5.78271	1.77172	2.73296	3.88971	4.53587	0	7.37248	2.74995	2.79706	2.46174	2.93318	2.55156	1.97383	7.36966	2.65161	0	7.11567	6.64726	3.38333	1.86526	2.87654	1.02691	12.1822	1.99498	4.32204	5.32194	1.97391	4.14732	5.18003	5.04681	3.25237	4.6222	3.5072
chr15_75335385_75335692	5.66477	7.055	0.887978	9.91322	4.42931	8.19888	17.5037	6.35022	11.9484	5.52936	2.74995	7.45883	6.15435	4.88863	9.35572	11.843	6.14139	4.41934	8.67057	8.1322	7.75514	3.38333	4.66314	10.5473	4.10765	4.42989	10.9724	11.2373	7.9829	8.88261	8.29463	6.66004	5.04681	8.13092	5.54664	3.5072
chr15_75870936_75871136	6.79773	2.01571	5.32787	7.43492	2.65759	0.910987	10.6967	4.53587	4.26727	2.76468	5.49991	3.72942	3.69261	5.86636	2.55156	3.94766	8.59794	6.18708	5.4191	6.09915	1.10788	5.07499	4.66314	4.79423	2.05382	4.42989	1.99498	7.77968	4.43495	13.8174	2.48839	5.18003	2.5234	6.50474	3.69776	5.84534
chr15_76418986_76419186	4.53182	4.03143	3.55191	7.43492	5.31517	2.73296	0.972427	7.25739	1.70691	1.84312	5.49991	5.59413	4.92348	2.93318	0.85052	0.986915	4.91311	3.53548	1.08382	1.01652	3.32363	3.38333	0.932628	1.91769	3.08074	14.3971	3.98995	5.18645	3.54796	1.97391	2.48839	2.96002	4.20567	0.813092	5.54664	3.5072
chr15_76976317_76976522	0	3.02357	7.10383	7.43492	7.97276	4.55493	2.91728	6.35022	3.41382	5.52936	4.58326	3.72942	3.69261	5.86636	12.7578	2.96074	2.45655	7.07095	1.08382	6.09915	2.21575	7.61249	6.5284	0	5.13456	3.32242	2.99247	4.32204	3.54796	3.94782	4.97678	2.22001	3.36454	1.62618	3.69776	3.5072
chr15_77044148_77044396	3.39886	5.03928	5.32787	4.13051	4.42931	5.46592	7.77942	1.81435	5.12073	5.52936	5.49991	0.932354	4.92348	4.88863	17.0104	4.93457	6.14139	0.883869	2.16764	2.03305	3.32363	2.5375	1.86526	5.75308	4.10765	4.42989	5.98493	2.59323	1.77398	0.986956	5.80624	3.70002	5.04681	4.87855	7.39552	4.67627
chr15_77614583_77614783	4.53182	3.02357	4.43989	4.13051	0.885862	0.910987	5.83456	3.62869	1.70691	1.84312	7.33321	0.932354	2.46174	4.88863	1.70104	3.94766	1.22828	3.53548	2.16764	3.04957	3.32363	1.69166	0.932628	3.83538	3.08074	5.53736	2.99247	3.45763	0	1.97391	3.31785	3.70002	0.841135	0.813092	2.77332	2.33813
chr15_78740783_78740993	5.66477	2.01571	1.77596	3.30441	4.42931	9.10987	0.972427	4.53587	4.26727	2.76468	6.41656	4.66177	4.92348	4.88863	4.2526	6.9084	6.14139	3.53548	4.33528	4.0661	3.32363	3.38333	5.59577	0.958846	12.3229	4.42989	2.99247	6.05086	2.66097	5.92174	0.829463	1.48001	1.68227	4.87855	5.54664	5.84534
chr15_79164406_79164606	2.26591	1.00786	1.77596	2.47831	0.885862	6.37691	12.6415	4.53587	4.26727	4.6078	3.66661	3.72942	7.38523	0	0.85052	8.88223	3.68483	1.76774	5.4191	2.03305	3.32363	3.38333	2.79788	3.83538	1.02691	2.21494	4.98744	0	2.66097	2.96087	3.31785	2.96002	1.68227	3.25237	3.69776	4.67627
chr15_79670284_79670484	5.66477	6.04714	2.66393	4.95661	2.65759	5.46592	11.6691	0.907174	5.97418	3.68624	2.74995	6.52648	4.92348	7.82182	2.55156	1.97383	1.22828	6.18708	2.16764	2.03305	5.53938	6.76666	5.59577	5.75308	5.13456	2.21494	4.98744	1.72882	2.66097	3.94782	0.829463	3.70002	3.36454	3.25237	1.84888	2.33813
chr15_79778830_79779030	6.79773	1.00786	0.887978	2.47831	0.885862	1.82197	1.94485	1.81435	0.853455	2.76468	1.8333	2.79706	6.15435	1.95545	1.70104	0.986915	9.82622	1.76774	3.25146	4.0661	1.10788	3.38333	0.932628	1.91769	2.05382	0	0.997489	2.59323	1.77398	0	1.65893	1.48001	3.36454	4.06546	3.69776	3.5072
chr15_80351615_80351818	3.39886	5.03928	15.9836	8.26102	4.42931	5.46592	2.91728	4.53587	7.68109	6.45092	5.49991	6.52648	2.46174	3.91091	6.80416	0.986915	1.22828	4.41934	3.25146	2.03305	6.64726	4.22916	4.66314	3.83538	6.16147	6.64483	1.99498	1.72882	4.43495	2.96087	9.95356	5.18003	4.20567	4.87855	4.6222	4.67627
chr15_80843077_80843277	14.7284	5.03928	3.55191	4.13051	0.885862	3.64395	0.972427	1.81435	6.82764	3.68624	4.58326	2.79706	3.69261	0.977727	5.10312	4.93457	2.45655	6.18708	2.16764	2.03305	2.21575	5.07499	4.66314	3.83538	4.10765	2.21494	1.99498	1.72882	1.77398	0.986956	3.31785	2.96002	0.841135	2.43928	0	3.5072
chr15_80860074_80860298	2.26591	5.03928	2.66393	5.78271	5.31517	8.19888	0.972427	5.44304	4.26727	5.52936	2.74995	4.66177	6.15435	3.91091	5.10312	0.986915	8.59794	3.53548	3.25146	5.08262	5.53938	5.07499	5.59577	4.79423	4.10765	5.53736	15.9598	2.59323	2.66097	6.90869	7.46517	6.66004	2.5234	4.06546	3.69776	2.33813
chr15_81604164_81604387	3.39886	4.03143	3.55191	5.78271	4.42931	4.55493	7.77942	5.44304	5.12073	4.6078	4.58326	4.66177	4.92348	5.86636	4.2526	6.9084	2.45655	5.30321	6.50292	5.08262	3.32363	4.22916	0.932628	2.87654	2.05382	1.10747	4.98744	3.45763	3.54796	2.96087	5.80624	3.70002	6.72908	4.87855	2.77332	14.0288
chr15_81619233_81619433	3.39886	2.01571	4.43989	2.47831	4.42931	0.910987	11.6691	4.53587	4.26727	1.84312	1.8333	0.932354	3.69261	2.93318	5.95364	3.94766	6.14139	6.18708	4.33528	5.08262	4.43151	3.38333	5.59577	3.83538	5.13456	2.21494	0.997489	1.72882	5.32194	2.96087	4.97678	3.70002	3.36454	2.43928	6.47108	1.16907
chr15_82010426_82010626	1.13295	2.01571	6.21585	0.826102	1.77172	13.6648	4.86213	1.81435	0.853455	0.92156	0.916652	1.86471	7.38523	2.93318	3.40208	2.96074	3.68483	5.30321	2.16764	1.01652	3.32363	4.22916	3.73051	2.87654	3.08074	2.21494	1.99498	6.05086	6.20893	3.94782	4.97678	4.44003	2.5234	4.06546	3.69776	2.33813
chr15_83861179_83861379	5.66477	5.03928	3.55191	4.95661	0	4.55493	2.91728	5.44304	1.70691	3.68624	2.74995	1.86471	7.38523	2.93318	13.6083	7.89532	9.82622	1.76774	5.4191	6.09915	3.32363	4.22916	4.66314	2.87654	4.10765	2.21494	8.9774	6.91527	2.66097	1.97391	0.829463	6.66004	2.5234	4.87855	7.39552	5.84534
chr15_84409461_84409691	3.39886	5.03928	5.32787	5.78271	6.20104	3.64395	2.91728	6.35022	6.82764	6.45092	8.24986	0	4.92348	1.95545	3.40208	3.94766	2.45655	2.65161	5.4191	3.04957	3.32363	5.07499	1.86526	4.79423	4.10765	3.32242	5.98493	3.45763	1.77398	16.7783	4.97678	3.70002	2.5234	4.06546	1.84888	2.33813
chr15_85243671_85243875	12.4625	7.055	9.76776	4.95661	7.97276	9.10987	8.75184	3.62869	6.82764	11.0587	7.33321	6.52648	11.0778	9.77727	6.80416	6.9084	11.0545	8.83869	3.25146	1.01652	11.0788	12.6875	8.39365	6.71192	5.13456	13.2897	21.9447	6.91527	7.09591	12.8304	9.95356	8.88006	13.4582	11.3833	10.1688	7.0144
chr15_85448620_85448868	0	5.03928	13.3197	4.95661	7.97276	5.46592	2.91728	2.72152	0.853455	4.6078	0.916652	6.52648	1.23087	5.86636	4.2526	2.96074	3.68483	3.53548	5.4191	6.09915	5.53938	3.38333	1.86526	4.79423	1.02691	5.53736	5.98493	4.32204	2.66097	8.88261	4.97678	3.70002	4.20567	4.06546	1.84888	3.5072
chr15_85935690_85935922	3.39886	4.03143	4.43989	3.30441	7.0869	2.73296	4.86213	2.72152	3.41382	3.68624	9.16652	4.66177	4.92348	2.93318	2.55156	8.88223	1.22828	2.65161	4.33528	4.0661	6.64726	0.845832	8.39365	0.958846	6.16147	1.10747	1.99498	4.32204	3.54796	2.96087	0.829463	6.66004	4.20567	4.06546	6.47108	15.1979
chr15_86601460_86601697	1.13295	7.055	4.43989	3.30441	1.77172	3.64395	0.972427	4.53587	2.56036	2.76468	2.74995	0	2.46174	2.93318	0	5.92149	6.14139	7.95482	1.08382	1.01652	7.75514	5.07499	2.79788	0.958846	4.10765	3.32242	2.99247	4.32204	2.66097	3.94782	1.65893	2.22001	2.5234	6.50474	1.84888	16.3669
chr15_90931194_90931401	9.06364	11.0864	8.87978	5.78271	7.0869	7.28789	8.75184	5.44304	9.388	6.45092	9.16652	11.1883	3.69261	8.79954	8.5052	5.92149	3.68483	6.18708	7.58674	5.08262	7.75514	4.22916	7.46102	6.71192	8.2153	16.6121	8.9774	7.77968	7.09591	4.93478	3.31785	4.44003	1.68227	6.50474	5.54664	7.0144
chr15_92803321_92803521	3.39886	5.03928	4.43989	1.6522	1.77172	12.7538	3.88971	1.81435	3.41382	2.76468	1.8333	3.72942	3.69261	8.79954	4.2526	5.92149	1.22828	5.30321	1.08382	5.08262	2.21575	6.76666	2.79788	5.75308	5.13456	4.42989	2.99247	5.18645	5.32194	3.94782	5.80624	4.44003	0.841135	3.25237	1.84888	3.5072
chr15_93156008_93156231	2.26591	1.00786	5.32787	0.826102	4.42931	1.82197	6.80699	2.72152	2.56036	3.68624	2.74995	2.79706	3.69261	3.91091	3.40208	3.94766	2.45655	3.53548	3.25146	2.03305	4.43151	2.5375	3.73051	2.87654	16.4306	1.10747	3.98995	6.05086	7.09591	2.96087	3.31785	6.66004	5.04681	0.813092	1.84888	0
chr15_93577991_93578191	1.13295	10.0786	3.55191	3.30441	4.42931	3.64395	2.91728	2.72152	0	7.37248	2.74995	5.59413	6.15435	1.95545	2.55156	8.88223	4.91311	0	5.4191	4.0661	3.32363	3.38333	2.79788	3.83538	0	14.3971	2.99247	1.72882	3.54796	0.986956	0.829463	4.44003	5.88794	1.62618	7.39552	1.16907
chr15_101670867_101671123	2.26591	4.03143	5.32787	1.6522	6.20104	4.55493	2.91728	4.53587	6.82764	2.76468	4.58326	0.932354	4.92348	2.93318	3.40208	2.96074	1.22828	0	3.25146	3.04957	0	4.22916	2.79788	2.87654	5.13456	2.21494	1.99498	4.32204	9.75688	3.94782	2.48839	2.22001	2.5234	3.25237	3.69776	2.33813
chr15_102292882_102293082	1.13295	0	0	0	0.885862	0.910987	0	0	0	0	0.916652	0.932354	1.23087	0.977727	0.85052	0	0	0	1.08382	3.04957	0	1.69166	0	0	3.08074	0	0.997489	0	0	0	0.829463	1.48001	0	0	0.92444	1.16907
chr15_102433314_102433580	0	1.00786	0	0	0.885862	0	0.972427	0	0.853455	0	0.916652	0	1.23087	0	0.85052	0	2.45655	0	0	0	0	0	0.932628	0	0	0	2.99247	0	0.886989	0	0.829463	0	0.841135	0	0.92444	0
chr15_102434262_102434480	1.13295	2.01571	6.21585	9.91322	1.77172	4.55493	5.83456	3.62869	3.41382	4.6078	7.33321	4.66177	1.23087	0.977727	1.70104	4.93457	4.91311	4.41934	3.25146	1.01652	5.53938	2.5375	1.86526	5.75308	3.08074	0	0.997489	5.18645	2.66097	4.93478	5.80624	1.48001	5.88794	4.87855	0	3.5072
chr15_102486084_102486303	2.26591	9.07071	3.55191	9.08712	11.5162	5.46592	7.77942	9.97891	9.388	7.37248	6.41656	6.52648	1.23087	8.79954	10.2062	12.8299	6.14139	11.4903	4.33528	0	5.53938	6.76666	10.2589	7.67077	8.2153	5.53736	6.98242	5.18645	5.32194	5.92174	9.95356	11.1001	4.20567	9.75711	8.31996	17.536
chr15_102501751_102502049	1.13295	2.01571	0	0	0.885862	3.64395	2.91728	5.44304	3.41382	0.92156	4.58326	1.86471	0	0.977727	1.70104	2.96074	2.45655	0.883869	2.16764	0	1.10788	0	1.86526	1.91769	2.05382	2.21494	1.99498	2.59323	0.886989	1.97391	2.48839	0.740005	3.36454	2.43928	0.92444	1.16907
chr15_102516986_102517186	0	1.00786	1.77596	1.6522	0	0.910987	0	0	0	0.92156	0.916652	0.932354	0	0	1.70104	0	1.22828	1.76774	1.08382	0	0	2.5375	4.66314	2.87654	0	0	0.997489	0.864408	1.77398	0.986956	0	2.96002	1.68227	0	1.84888	1.16907
chr16_420417_420639	9.06364	6.04714	3.55191	4.13051	7.97276	3.64395	9.72427	4.53587	5.12073	7.37248	1.8333	3.72942	7.38523	4.88863	8.5052	2.96074	4.91311	5.30321	1.08382	8.1322	6.64726	6.76666	2.79788	4.79423	6.16147	5.53736	3.98995	6.05086	3.54796	3.94782	5.80624	6.66004	2.5234	1.62618	7.39552	1.16907
chr16_2209053_2209253	2.26591	6.04714	5.32787	4.13051	3.54345	7.28789	2.91728	3.62869	0	7.37248	5.49991	13.9853	1.23087	0.977727	4.2526	5.92149	1.22828	5.30321	3.25146	6.09915	3.32363	4.22916	1.86526	3.83538	4.10765	3.32242	2.99247	4.32204	4.43495	2.96087	6.6357	4.44003	6.72908	6.50474	3.69776	1.16907
chr16_2479131_2479434	7.93068	5.03928	5.32787	10.7393	6.20104	9.10987	5.83456	8.16456	8.53455	7.37248	13.7498	12.1206	11.0778	8.79954	9.35572	5.92149	9.82622	7.95482	13.0058	8.1322	11.0788	10.15	6.5284	4.79423	5.13456	6.64483	6.98242	6.05086	4.43495	0.986956	11.6125	11.1001	5.88794	9.75711	4.6222	21.0432
chr16_3009479_3009679	0	4.03143	5.32787	0.826102	3.54345	3.64395	3.88971	2.72152	7.68109	5.52936	2.74995	3.72942	4.92348	3.91091	2.55156	3.94766	8.59794	3.53548	6.50292	3.04957	15.5103	0.845832	1.86526	6.71192	5.13456	1.10747	2.99247	6.91527	3.54796	4.93478	4.97678	1.48001	0.841135	4.06546	1.84888	2.33813
chr16_3450944_3451144	2.26591	8.06285	4.43989	5.78271	4.42931	7.28789	7.77942	7.25739	14.5087	7.37248	5.49991	7.45883	3.69261	1.95545	6.80416	3.94766	8.59794	4.41934	4.33528	4.0661	4.43151	5.07499	3.73051	7.67077	5.13456	5.53736	3.98995	4.32204	6.20893	3.94782	9.12409	5.92004	5.88794	4.87855	7.39552	1.16907
chr16_5203146_5203346	5.66477	3.02357	0.887978	2.47831	1.77172	1.82197	1.94485	1.81435	0.853455	5.52936	3.66661	1.86471	1.23087	0.977727	5.10312	0.986915	3.68483	4.41934	3.25146	5.08262	2.21575	5.07499	2.79788	2.87654	12.3229	4.42989	4.98744	2.59323	0.886989	2.96087	2.48839	3.70002	0.841135	6.50474	2.77332	1.16907
chr16_11036271_11036473	7.93068	8.06285	12.4317	4.13051	7.97276	3.64395	5.83456	7.25739	6.82764	4.6078	8.24986	6.52648	8.6161	2.93318	4.2526	4.93457	8.59794	3.53548	8.67057	15.2479	9.97089	3.38333	8.39365	7.67077	7.18839	8.85978	6.98242	9.50849	2.66097	6.90869	13.2714	5.92004	5.88794	4.87855	6.47108	12.8597
chr16_12266980_12267208	7.93068	5.03928	1.77596	3.30441	1.77172	15.4868	2.91728	7.25739	3.41382	1.84312	5.49991	6.52648	4.92348	4.88863	0.85052	3.94766	1.22828	5.30321	6.50292	1.01652	4.43151	10.9958	2.79788	7.67077	3.08074	4.42989	6.98242	2.59323	0.886989	4.93478	0.829463	5.92004	0.841135	2.43928	1.84888	1.16907
chr16_12389588_12389893	4.53182	7.055	1.77596	6.60881	4.42931	3.64395	16.5313	4.53587	7.68109	3.68624	5.49991	4.66177	3.69261	1.95545	1.70104	2.96074	6.14139	5.30321	9.75439	2.03305	3.32363	5.07499	5.59577	7.67077	4.10765	3.32242	4.98744	6.05086	5.32194	2.96087	3.31785	8.14005	5.04681	2.43928	3.69776	11.6907
chr16_14156973_14157230	7.93068	3.02357	3.55191	4.13051	3.54345	1.82197	12.6415	1.81435	3.41382	2.76468	1.8333	7.45883	4.92348	1.95545	2.55156	2.96074	6.14139	7.95482	4.33528	1.01652	8.86302	3.38333	5.59577	4.79423	4.10765	4.42989	1.99498	4.32204	4.43495	3.94782	3.31785	7.40005	5.04681	6.50474	2.77332	1.16907
chr16_14158478_14158678	2.26591	1.00786	1.77596	4.95661	2.65759	3.64395	0	4.53587	5.97418	0.92156	8.24986	6.52648	2.46174	2.93318	2.55156	4.93457	6.14139	6.18708	1.08382	3.04957	1.10788	5.92083	5.59577	6.71192	12.3229	4.42989	3.98995	0.864408	4.43495	7.89565	4.97678	1.48001	1.68227	3.25237	3.69776	1.16907
chr16_15029313_15029513	6.79773	1.00786	2.66393	5.78271	6.20104	4.55493	0.972427	2.72152	2.56036	1.84312	0.916652	3.72942	0	3.91091	1.70104	1.97383	1.22828	3.53548	3.25146	1.01652	2.21575	1.69166	1.86526	0	1.02691	6.64483	2.99247	1.72882	2.66097	1.97391	2.48839	2.22001	2.5234	3.25237	5.54664	8.18347
chr16_15064133_15064371	2.26591	8.06285	19.5355	5.78271	8.85862	6.37691	9.72427	9.07174	11.0949	5.52936	7.33321	4.66177	4.92348	5.86636	7.65468	8.88223	4.91311	1.76774	11.922	6.09915	8.86302	5.07499	8.39365	6.71192	10.2691	6.64483	4.98744	6.91527	6.20893	3.94782	8.29463	4.44003	5.88794	13.0095	1.84888	5.84534
chr16_16603215_16603426	1.13295	3.02357	0.887978	2.47831	0	2.73296	1.94485	3.62869	1.70691	0	0.916652	3.72942	1.23087	2.93318	1.70104	1.97383	2.45655	1.76774	1.08382	3.04957	0	2.5375	1.86526	0.958846	0	4.42989	3.98995	2.59323	0	0	2.48839	2.96002	1.68227	2.43928	0.92444	0
chr16_17551260_17551460	4.53182	5.03928	7.10383	3.30441	5.31517	2.73296	4.86213	1.81435	2.56036	4.6078	2.74995	2.79706	4.92348	7.82182	1.70104	3.94766	0	4.41934	5.4191	2.03305	3.32363	2.5375	8.39365	2.87654	13.3499	3.32242	6.98242	5.18645	2.66097	0.986956	1.65893	5.18003	4.20567	3.25237	2.77332	4.67627
chr16_19654152_19654370	5.66477	6.04714	4.43989	4.13051	7.0869	4.55493	13.614	0.907174	7.68109	1.84312	1.8333	1.86471	4.92348	5.86636	3.40208	6.9084	1.22828	2.65161	5.4191	2.03305	1.10788	2.5375	3.73051	2.87654	8.2153	5.53736	3.98995	8.64408	2.66097	0.986956	2.48839	6.66004	3.36454	4.06546	3.69776	4.67627
chr16_21858851_21859051	1.13295	1.00786	0.887978	0	0.885862	1.82197	1.94485	0	0.853455	0.92156	1.8333	1.86471	0	0	1.70104	0	0	0	1.08382	1.01652	0	0	0.932628	0.958846	0	0	0	0	1.77398	0	0.829463	1.48001	0	1.62618	1.84888	1.16907
chr16_21881703_21881903	0	0	0	0.826102	0	0	0	0	0.853455	1.84312	0	0	0	0	0	0.986915	1.22828	0	1.08382	0	0	0	0	0	0	0	0.997489	0	0	0	0	0	0	0	0.92444	0
chr16_22587169_22587369	3.39886	6.04714	8.87978	4.13051	7.97276	3.64395	3.88971	5.44304	4.26727	9.2156	7.33321	8.39119	6.15435	5.86636	7.65468	6.9084	6.14139	7.95482	4.33528	5.08262	3.32363	8.45832	3.73051	6.71192	5.13456	17.7196	4.98744	0.864408	7.09591	10.8565	7.46517	5.18003	3.36454	4.06546	9.2444	2.33813
chr16_22703715_22703917	6.79773	8.06285	5.32787	9.08712	6.20104	19.1307	2.91728	8.16456	6.82764	7.37248	7.33321	7.45883	4.92348	9.77727	9.35572	7.89532	6.14139	5.30321	9.75439	6.09915	9.97089	12.6875	10.2589	7.67077	4.10765	4.42989	4.98744	6.91527	0.886989	5.92174	9.12409	8.14005	6.72908	7.31783	2.77332	10.5216
chr16_24297465_24297693	2.26591	5.03928	2.66393	1.6522	0	4.55493	13.614	3.62869	5.97418	1.84312	2.74995	2.79706	3.69261	1.95545	5.95364	4.93457	1.22828	3.53548	3.25146	4.0661	5.53938	2.5375	2.79788	1.91769	1.02691	7.75231	5.98493	2.59323	4.43495	4.93478	1.65893	3.70002	2.5234	4.06546	0.92444	4.67627
chr16_25767743_25767943	0	1.00786	5.32787	3.30441	4.42931	3.64395	0	1.81435	1.70691	1.84312	2.74995	13.9853	1.23087	1.95545	6.80416	4.93457	2.45655	2.65161	5.4191	4.0661	1.10788	5.07499	1.86526	3.83538	3.08074	3.32242	3.98995	1.72882	0.886989	1.97391	2.48839	4.44003	4.20567	5.69165	5.54664	3.5072
chr16_26174444_26174644	6.79773	4.03143	2.66393	4.13051	2.65759	0.910987	3.88971	8.16456	2.56036	6.45092	0.916652	3.72942	8.6161	2.93318	5.10312	5.92149	0	1.76774	13.0058	4.0661	2.21575	5.92083	4.66314	4.79423	4.10765	5.53736	0.997489	2.59323	1.77398	2.96087	2.48839	4.44003	0.841135	5.69165	3.69776	2.33813
chr16_26474891_26475101	5.66477	5.03928	7.9918	8.26102	2.65759	1.82197	6.80699	8.16456	2.56036	1.84312	6.41656	0.932354	4.92348	1.95545	4.2526	1.97383	4.91311	3.53548	3.25146	6.09915	2.21575	1.69166	4.66314	0.958846	1.02691	2.21494	2.99247	4.32204	3.54796	2.96087	3.31785	2.22001	1.68227	4.06546	0.92444	15.1979
chr16_27479293_27479493	1.13295	2.01571	7.9918	4.13051	3.54345	3.64395	11.6691	4.53587	5.12073	6.45092	7.33321	1.86471	4.92348	7.82182	5.10312	2.96074	4.91311	3.53548	3.25146	5.08262	3.32363	1.69166	2.79788	5.75308	6.16147	2.21494	1.99498	4.32204	5.32194	4.93478	4.14732	2.96002	2.5234	2.43928	4.6222	3.5072
chr16_27616530_27616733	2.26591	8.06285	2.66393	4.13051	3.54345	2.73296	4.86213	2.72152	11.9484	0.92156	4.58326	2.79706	1.23087	5.86636	3.40208	2.96074	7.36966	4.41934	0	2.03305	1.10788	1.69166	5.59577	0.958846	5.13456	3.32242	2.99247	2.59323	4.43495	0.986956	2.48839	5.18003	4.20567	3.25237	3.69776	5.84534
chr16_28674478_28674789	1.13295	0	0.887978	0.826102	3.54345	0.910987	0.972427	2.72152	0.853455	0	1.8333	0.932354	0	2.93318	0.85052	0	2.45655	0	2.16764	0	1.10788	0	0.932628	0.958846	1.02691	0	0.997489	1.72882	0	0.986956	0	1.48001	0.841135	0.813092	2.77332	0
chr16_28757291_28757491	4.53182	3.02357	0	0.826102	2.65759	3.64395	7.77942	4.53587	1.70691	2.76468	2.74995	3.72942	0	3.91091	3.40208	2.96074	3.68483	1.76774	9.75439	0	0	2.5375	3.73051	3.83538	2.05382	2.21494	0.997489	0.864408	1.77398	1.97391	0.829463	1.48001	2.5234	4.06546	1.84888	0
chr16_28823627_28823827	0	4.03143	6.21585	1.6522	3.54345	2.73296	0.972427	4.53587	1.70691	1.84312	4.58326	1.86471	1.23087	7.82182	5.10312	2.96074	4.91311	5.30321	5.4191	2.03305	3.32363	2.5375	5.59577	0.958846	4.10765	5.53736	11.9699	0.864408	1.77398	4.93478	3.31785	3.70002	7.57021	6.50474	3.69776	2.33813
chr16_28834612_28834812	9.06364	2.01571	2.66393	6.60881	7.0869	2.73296	1.94485	3.62869	5.97418	5.52936	2.74995	6.52648	4.92348	6.84409	7.65468	4.93457	12.2828	5.30321	4.33528	4.0661	13.2945	5.07499	5.59577	1.91769	10.2691	5.53736	1.99498	6.05086	4.43495	4.93478	9.95356	4.44003	4.20567	4.06546	6.47108	10.5216
chr16_29367136_29367354	4.53182	2.01571	0	1.6522	1.77172	1.82197	3.88971	1.81435	0.853455	10.1372	2.74995	0.932354	4.92348	0.977727	4.2526	5.92149	1.22828	8.83869	3.25146	4.0661	4.43151	8.45832	1.86526	0.958846	4.10765	3.32242	2.99247	2.59323	1.77398	2.96087	2.48839	6.66004	4.20567	3.25237	2.77332	3.5072
chr16_29379431_29379631	1.13295	1.00786	0	0.826102	1.77172	0.910987	1.94485	0.907174	0	0.92156	0.916652	0.932354	0	0	1.70104	0.986915	2.45655	1.76774	1.08382	1.01652	0	0.845832	0	0.958846	1.02691	1.10747	0.997489	0	0.886989	0	0.829463	1.48001	0	0.813092	0.92444	1.16907
chr16_30589817_30590070	2.26591	4.03143	6.21585	0.826102	4.42931	2.73296	3.88971	3.62869	4.26727	5.52936	2.74995	7.45883	9.84697	9.77727	3.40208	1.97383	7.36966	0.883869	3.25146	8.1322	7.75514	5.07499	10.2589	0	14.3768	3.32242	4.98744	2.59323	5.32194	2.96087	8.29463	2.22001	1.68227	5.69165	4.6222	8.18347
chr16_31646326_31646590	2.26591	1.00786	0.887978	1.6522	2.65759	2.73296	2.91728	0.907174	8.53455	0.92156	2.74995	4.66177	1.23087	5.86636	2.55156	3.94766	4.91311	1.76774	2.16764	3.04957	0	1.69166	2.79788	4.79423	2.05382	2.21494	1.99498	0.864408	3.54796	3.94782	1.65893	4.44003	2.5234	5.69165	2.77332	3.5072
chr16_32103018_32103349	16.9943	23.1807	23.0874	32.218	22.1466	22.7747	20.421	20.865	20.4829	22.1174	19.2497	21.4441	32.0026	24.4432	20.4125	25.6598	22.109	27.3999	30.347	24.3966	29.9127	23.6833	26.1136	22.0535	26.6997	24.3644	21.9447	31.1187	26.6097	24.6739	38.1553	19.9801	22.7106	29.2713	22.1866	24.5504
chr16_32211973_32212215	1.13295	5.03928	7.9918	2.47831	2.65759	1.82197	1.94485	1.81435	1.70691	4.6078	1.8333	2.79706	1.23087	0.977727	0	2.96074	2.45655	0.883869	2.16764	3.04957	1.10788	1.69166	0.932628	1.91769	2.05382	2.21494	0.997489	1.72882	1.77398	2.96087	1.65893	3.70002	2.5234	1.62618	1.84888	2.33813
chr16_32637494_32637694	4.53182	4.03143	6.21585	1.6522	4.42931	4.55493	3.88971	5.44304	4.26727	4.6078	6.41656	5.59413	1.23087	4.88863	4.2526	3.94766	2.45655	9.72256	5.4191	7.11567	8.86302	9.30416	4.66314	5.75308	15.4037	7.75231	5.98493	7.77968	3.54796	8.88261	1.65893	0	7.57021	7.31783	4.6222	1.16907
chr16_32661248_32661448	2.26591	0	3.55191	0	3.54345	2.73296	0.972427	0	2.56036	0	0	0	1.23087	1.95545	0.85052	1.97383	2.45655	1.76774	1.08382	3.04957	1.10788	4.22916	0.932628	2.87654	1.02691	2.21494	1.99498	2.59323	0.886989	2.96087	2.48839	2.96002	4.20567	0.813092	1.84888	2.33813
chr16_32947837_32948060	0	0	0	1.6522	0	0.910987	0	0	1.70691	0.92156	0	1.86471	1.23087	0.977727	0	0	0	0.883869	1.08382	1.01652	1.10788	0.845832	0	0	2.05382	0	1.99498	0	1.77398	0.986956	1.65893	0.740005	0.841135	0	0.92444	0
chr16_33040729_33041155	24.925	7.055	17.7596	15.6959	11.5162	18.2197	14.5864	9.07174	11.9484	9.2156	10.0832	20.5118	9.84697	16.6214	8.5052	14.8037	12.2828	20.329	17.3411	22.3635	24.3733	16.9166	13.0568	13.4238	17.4575	14.3971	12.9674	19.8814	15.9658	21.713	21.566	17.7601	20.1872	21.1404	17.5644	12.8597
chr16_33053282_33053529	19.2602	21.165	9.76776	17.3481	15.0597	15.4868	9.72427	18.1435	16.2156	21.1959	15.5831	15.85	19.6939	12.7104	20.4125	16.7776	17.1959	19.4451	18.425	11.1818	11.0788	12.6875	15.8547	26.8477	28.7535	15.5046	19.9498	20.7458	17.7398	14.8043	14.1009	20.7201	20.1872	21.1404	13.8666	17.536
chr16_33066705_33066906	0	1.00786	0.887978	1.6522	1.77172	0	2.91728	1.81435	0.853455	2.76468	0.916652	0	0	0	1.70104	0	1.22828	0.883869	1.08382	3.04957	1.10788	2.5375	0	0	2.05382	2.21494	1.99498	0	1.77398	1.97391	0.829463	1.48001	0.841135	1.62618	0	1.16907
chr16_33381256_33381530	7.93068	9.07071	8.87978	6.60881	6.20104	10.0209	4.86213	12.7004	9.388	6.45092	6.41656	13.053	6.15435	8.79954	6.80416	11.843	6.14139	7.95482	21.6764	4.0661	11.0788	3.38333	11.1915	12.465	5.13456	7.75231	8.9774	7.77968	7.9829	11.8435	9.12409	5.92004	8.41135	9.75711	18.4888	7.0144
chr16_35168628_35168918	5.66477	7.055	7.9918	4.13051	2.65759	3.64395	8.75184	9.07174	4.26727	3.68624	6.41656	3.72942	1.23087	3.91091	2.55156	4.93457	2.45655	7.07095	6.50292	7.11567	6.64726	1.69166	5.59577	5.75308	3.08074	6.64483	15.9598	6.91527	1.77398	4.93478	6.6357	4.44003	5.04681	5.69165	3.69776	3.5072
chr16_46492254_46492478	21.5261	13.1021	14.2077	15.6959	15.0597	11.8428	13.614	14.5148	24.7502	15.6665	8.24986	20.5118	11.0778	17.5991	8.5052	19.7383	11.0545	13.258	13.0058	16.2644	19.9418	13.5333	14.922	16.3004	17.4575	18.827	13.9648	14.6949	13.3048	25.6609	18.2482	14.0601	16.8227	23.5797	16.6399	26.8885
chr16_50809673_50809873	1.13295	2.01571	1.77596	4.13051	0.885862	2.73296	0.972427	5.44304	4.26727	0.92156	6.41656	2.79706	4.92348	1.95545	1.70104	6.9084	3.68483	5.30321	5.4191	5.08262	14.4024	2.5375	2.79788	4.79423	7.18839	2.21494	2.99247	5.18645	1.77398	4.93478	3.31785	2.22001	5.04681	4.87855	4.6222	4.67627
chr16_50818424_50818624	5.66477	3.02357	1.77596	3.30441	7.97276	4.55493	5.83456	0.907174	3.41382	1.84312	8.24986	2.79706	2.46174	3.91091	3.40208	2.96074	6.14139	7.07095	6.50292	6.09915	7.75514	3.38333	1.86526	2.87654	4.10765	13.2897	7.97991	9.50849	4.43495	7.89565	1.65893	2.22001	3.36454	3.25237	2.77332	4.67627
chr16_53913149_53913417	1.13295	3.02357	3.55191	6.60881	1.77172	3.64395	4.86213	4.53587	4.26727	7.37248	7.33321	3.72942	2.46174	4.88863	1.70104	3.94766	1.22828	3.53548	6.50292	6.09915	1.10788	3.38333	1.86526	0.958846	13.3499	2.21494	1.99498	2.59323	0.886989	3.94782	2.48839	2.22001	4.20567	6.50474	6.47108	0
chr16_54063183_54063383	2.26591	5.03928	4.43989	5.78271	2.65759	3.64395	12.6415	5.44304	3.41382	6.45092	4.58326	2.79706	6.15435	2.93318	5.95364	4.93457	1.22828	2.65161	0	5.08262	2.21575	4.22916	4.66314	1.91769	1.02691	4.42989	2.99247	2.59323	3.54796	0.986956	4.97678	5.18003	5.04681	0.813092	1.84888	2.33813
chr16_54102203_54102403	3.39886	2.01571	6.21585	3.30441	4.42931	15.4868	1.94485	4.53587	3.41382	0.92156	3.66661	5.59413	2.46174	4.88863	2.55156	4.93457	7.36966	3.53548	5.4191	5.08262	5.53938	5.92083	0	3.83538	2.05382	4.42989	2.99247	4.32204	9.75688	3.94782	4.14732	3.70002	5.88794	4.87855	2.77332	5.84534
chr16_54512260_54512460	3.39886	5.03928	3.55191	0.826102	3.54345	6.37691	13.614	3.62869	2.56036	1.84312	8.24986	3.72942	3.69261	2.93318	0.85052	0.986915	6.14139	7.07095	7.58674	1.01652	3.32363	4.22916	3.73051	3.83538	3.08074	2.21494	4.98744	6.05086	4.43495	2.96087	0.829463	6.66004	5.88794	2.43928	3.69776	1.16907
chr16_55384791_55384991	4.53182	5.03928	6.21585	4.13051	4.42931	4.55493	0	1.81435	1.70691	4.6078	3.66661	1.86471	7.38523	2.93318	1.70104	4.93457	4.91311	3.53548	13.0058	7.11567	4.43151	5.07499	2.79788	5.75308	0	1.10747	7.97991	3.45763	4.43495	1.97391	4.14732	5.18003	5.04681	2.43928	3.69776	5.84534
chr16_55702991_55703191	3.39886	3.02357	0	4.95661	4.42931	3.64395	0.972427	4.53587	1.70691	6.45092	0.916652	3.72942	2.46174	0.977727	4.2526	0.986915	9.82622	5.30321	5.4191	6.09915	3.32363	3.38333	2.79788	4.79423	2.05382	9.96725	1.99498	1.72882	2.66097	3.94782	1.65893	3.70002	3.36454	2.43928	0.92444	3.5072
chr16_55861588_55861848	5.66477	8.06285	5.32787	4.95661	4.42931	3.64395	4.86213	5.44304	7.68109	5.52936	4.58326	9.32354	18.4631	5.86636	4.2526	2.96074	2.45655	8.83869	5.4191	6.09915	9.97089	5.92083	7.46102	9.58846	4.10765	7.75231	4.98744	4.32204	7.09591	7.89565	4.14732	8.14005	6.72908	5.69165	9.2444	12.8597
chr16_56773478_56773711	4.53182	3.02357	0.887978	4.13051	0	2.73296	2.91728	5.44304	4.26727	2.76468	3.66661	2.79706	2.46174	5.86636	2.55156	3.94766	3.68483	1.76774	1.08382	6.09915	4.43151	3.38333	3.73051	0.958846	2.05382	3.32242	5.98493	1.72882	0.886989	4.93478	1.65893	1.48001	5.04681	4.06546	2.77332	3.5072
chr16_57569843_57570043	4.53182	9.07071	7.9918	5.78271	6.20104	1.82197	7.77942	5.44304	5.12073	13.8234	8.24986	6.52648	2.46174	3.91091	3.40208	5.92149	8.59794	6.18708	3.25146	3.04957	3.32363	1.69166	3.73051	8.62962	6.16147	12.1822	5.98493	1.72882	7.09591	13.8174	4.97678	8.14005	1.68227	5.69165	7.39552	4.67627
chr16_58157787_58157987	2.26591	6.04714	4.43989	3.30441	5.31517	0.910987	3.88971	1.81435	11.9484	0.92156	0.916652	5.59413	2.46174	2.93318	4.2526	1.97383	6.14139	2.65161	3.25146	6.09915	4.43151	5.92083	2.79788	5.75308	2.05382	2.21494	0.997489	5.18645	2.66097	2.96087	5.80624	2.22001	1.68227	6.50474	3.69776	5.84534
chr16_58788857_58789057	0	2.01571	3.55191	4.95661	2.65759	4.55493	12.6415	2.72152	5.12073	2.76468	3.66661	3.72942	7.38523	4.88863	3.40208	1.97383	4.91311	2.65161	4.33528	5.08262	3.32363	3.38333	6.5284	2.87654	3.08074	2.21494	2.99247	7.77968	0.886989	5.92174	3.31785	2.22001	4.20567	3.25237	4.6222	3.5072
chr16_58906629_58906829	1.13295	5.03928	0.887978	2.47831	4.42931	4.55493	3.88971	2.72152	3.41382	2.76468	3.66661	3.72942	6.15435	1.95545	1.70104	4.93457	2.45655	7.95482	7.58674	7.11567	4.43151	3.38333	3.73051	2.87654	2.05382	5.53736	12.9674	8.64408	9.75688	2.96087	4.14732	7.40005	3.36454	2.43928	3.69776	1.16907
chr16_64612699_64612903	5.66477	1.00786	7.9918	9.91322	2.65759	1.82197	5.83456	5.44304	1.70691	4.6078	1.8333	1.86471	2.46174	2.93318	2.55156	2.96074	3.68483	2.65161	2.16764	2.03305	15.5103	5.07499	2.79788	2.87654	3.08074	2.21494	3.98995	2.59323	5.32194	0.986956	4.97678	3.70002	2.5234	1.62618	4.6222	4.67627
chr16_65970041_65970254	3.39886	2.01571	8.87978	5.78271	4.42931	3.64395	3.88971	0	3.41382	2.76468	1.8333	1.86471	16.0013	3.91091	2.55156	0.986915	0	5.30321	5.4191	6.09915	5.53938	4.22916	0	0.958846	3.08074	3.32242	2.99247	4.32204	4.43495	0.986956	4.97678	3.70002	5.88794	4.06546	2.77332	4.67627
chr16_66730737_66730937	4.53182	8.06285	6.21585	4.95661	4.42931	1.82197	2.91728	7.25739	8.53455	7.37248	5.49991	9.32354	1.23087	6.84409	8.5052	2.96074	8.59794	4.41934	7.58674	4.0661	5.53938	5.07499	8.39365	5.75308	5.13456	7.75231	12.9674	6.05086	5.32194	11.8435	6.6357	5.92004	2.5234	9.75711	3.69776	5.84534
chr16_66912161_66912361	4.53182	2.01571	3.55191	4.13051	3.54345	3.64395	5.83456	3.62869	5.12073	4.6078	6.41656	5.59413	2.46174	6.84409	4.2526	5.92149	2.45655	3.53548	2.16764	3.04957	5.53938	3.38333	5.59577	6.71192	6.16147	3.32242	5.98493	0.864408	5.32194	3.94782	7.46517	5.18003	14.2993	5.69165	2.77332	4.67627
chr16_67048039_67048239	1.13295	3.02357	13.3197	4.13051	6.20104	7.28789	5.83456	6.35022	6.82764	6.45092	4.58326	8.39119	3.69261	5.86636	0.85052	5.92149	2.45655	2.65161	7.58674	8.1322	5.53938	5.07499	7.46102	1.91769	7.18839	3.32242	6.98242	2.59323	6.20893	3.94782	6.6357	6.66004	4.20567	1.62618	0.92444	4.67627
chr16_67669190_67669390	3.39886	5.03928	7.10383	3.30441	6.20104	3.64395	10.6967	7.25739	4.26727	9.2156	2.74995	5.59413	1.23087	2.93318	1.70104	4.93457	4.91311	7.07095	4.33528	3.04957	2.21575	6.76666	4.66314	1.91769	7.18839	5.53736	3.98995	3.45763	5.32194	2.96087	2.48839	3.70002	6.72908	4.06546	3.69776	4.67627
chr16_67867493_67867923	5.66477	7.055	7.9918	5.78271	8.85862	3.64395	3.88971	5.44304	5.97418	4.6078	7.33321	3.72942	6.15435	8.79954	10.2062	5.92149	7.36966	4.41934	10.8382	9.14872	3.32363	7.61249	7.46102	9.58846	5.13456	23.2569	7.97991	11.2373	9.75688	6.90869	8.29463	8.14005	8.41135	7.31783	8.31996	4.67627
chr16_67957840_67958067	1.13295	5.03928	2.66393	4.95661	5.31517	2.73296	3.88971	5.44304	5.12073	4.6078	9.16652	2.79706	2.46174	4.88863	2.55156	6.9084	6.14139	7.07095	15.1735	3.04957	1.10788	5.92083	1.86526	2.87654	4.10765	1.10747	3.98995	4.32204	4.43495	0.986956	4.97678	5.92004	0	4.87855	7.39552	1.16907
chr16_68144991_68145268	1.13295	5.03928	6.21585	5.78271	6.20104	4.55493	0.972427	3.62869	3.41382	2.76468	6.41656	5.59413	1.23087	1.95545	6.80416	7.89532	8.59794	1.76774	4.33528	6.09915	4.43151	5.92083	3.73051	6.71192	6.16147	6.64483	15.9598	5.18645	2.66097	2.96087	4.97678	3.70002	2.5234	7.31783	2.77332	4.67627
chr16_69551843_69552043	1.13295	2.01571	1.77596	2.47831	1.77172	3.64395	3.88971	0.907174	10.2415	3.68624	2.74995	5.59413	4.92348	2.93318	2.55156	0.986915	1.22828	1.76774	5.4191	3.04957	4.43151	0.845832	2.79788	3.83538	2.05382	4.42989	1.99498	1.72882	0.886989	0.986956	3.31785	3.70002	2.5234	4.06546	1.84888	7.0144
chr16_70121061_70121261	3.39886	3.02357	2.66393	4.13051	4.42931	3.64395	7.77942	6.35022	1.70691	0.92156	6.41656	0.932354	3.69261	3.91091	0.85052	1.97383	0	5.30321	2.16764	4.0661	3.32363	2.5375	4.66314	1.91769	3.08074	2.21494	0.997489	4.32204	2.66097	5.92174	7.46517	6.66004	1.68227	4.06546	8.31996	1.16907
chr16_70261954_70262164	3.39886	11.0864	2.66393	2.47831	0	1.82197	3.88971	5.44304	2.56036	4.6078	2.74995	3.72942	1.23087	1.95545	4.2526	3.94766	2.45655	6.18708	3.25146	3.04957	3.32363	2.5375	4.66314	2.87654	6.16147	1.10747	1.99498	6.05086	8.86989	1.97391	0.829463	2.96002	2.5234	4.06546	1.84888	3.5072
chr16_70353708_70353923	3.39886	5.03928	5.32787	3.30441	2.65759	3.64395	0	2.72152	1.70691	7.37248	0.916652	2.79706	2.46174	2.93318	3.40208	2.96074	3.68483	1.76774	4.33528	4.0661	1.10788	4.22916	8.39365	1.91769	4.10765	2.21494	12.9674	1.72882	4.43495	0	4.97678	3.70002	5.88794	4.06546	0.92444	2.33813
chr16_73216594_73216794	4.53182	6.04714	3.55191	3.30441	1.77172	0.910987	3.88971	3.62869	3.41382	3.68624	0.916652	6.52648	17.2322	4.88863	2.55156	6.9084	4.91311	3.53548	5.4191	4.0661	4.43151	4.22916	2.79788	4.79423	2.05382	5.53736	3.98995	4.32204	2.66097	1.97391	0	0.740005	5.04681	1.62618	2.77332	1.16907
chr16_75181808_75182008	2.26591	5.03928	10.6557	5.78271	2.65759	5.46592	0	5.44304	1.70691	8.29404	0	6.52648	0	4.88863	2.55156	6.9084	4.91311	4.41934	0	3.04957	3.32363	3.38333	3.73051	1.91769	4.10765	1.10747	2.99247	0.864408	2.66097	3.94782	4.97678	2.96002	2.5234	3.25237	4.6222	2.33813
chr16_76413292_76413492	1.13295	6.04714	1.77596	2.47831	3.54345	3.64395	0	0.907174	5.97418	1.84312	2.74995	1.86471	4.92348	2.93318	5.10312	2.96074	2.45655	7.07095	4.33528	4.0661	2.21575	5.07499	3.73051	4.79423	4.10765	13.2897	4.98744	3.45763	4.43495	2.96087	3.31785	5.18003	5.04681	1.62618	0	7.0144
chr16_78155130_78155330	1.13295	3.02357	7.10383	2.47831	0.885862	3.64395	11.6691	1.81435	6.82764	0	1.8333	4.66177	2.46174	3.91091	1.70104	0	4.91311	4.41934	3.25146	5.08262	8.86302	4.22916	5.59577	3.83538	4.10765	3.32242	2.99247	6.91527	2.66097	4.93478	3.31785	0.740005	4.20567	1.62618	5.54664	0
chr16_78428513_78428784	2.26591	1.00786	7.9918	5.78271	4.42931	6.37691	3.88971	3.62869	6.82764	3.68624	2.74995	2.79706	2.46174	2.93318	0	3.94766	1.22828	2.65161	19.5088	4.0661	2.21575	4.22916	2.79788	2.87654	7.18839	5.53736	1.99498	10.3729	1.77398	3.94782	1.65893	4.44003	4.20567	3.25237	1.84888	3.5072
chr16_80276088_80276302	3.39886	4.03143	1.77596	3.30441	3.54345	2.73296	2.91728	1.81435	4.26727	0.92156	1.8333	2.79706	2.46174	1.95545	3.40208	0.986915	1.22828	5.30321	14.0897	3.04957	2.21575	5.07499	3.73051	6.71192	3.08074	3.32242	3.98995	3.45763	2.66097	8.88261	4.97678	5.92004	3.36454	2.43928	7.39552	3.5072
chr16_81126930_81127159	1.13295	6.04714	4.43989	5.78271	4.42931	1.82197	1.94485	3.62869	2.56036	1.84312	3.66661	6.52648	2.46174	2.93318	2.55156	1.97383	6.14139	6.18708	5.4191	2.03305	1.10788	6.76666	1.86526	2.87654	2.05382	2.21494	10.9724	5.18645	7.9829	6.90869	3.31785	2.22001	2.5234	3.25237	5.54664	2.33813
chr16_83878225_83878435	3.39886	5.03928	2.66393	3.30441	2.65759	1.82197	1.94485	3.62869	2.56036	1.84312	2.74995	14.9177	2.46174	4.88863	0	1.97383	3.68483	0.883869	3.25146	2.03305	1.10788	2.5375	5.59577	6.71192	2.05382	1.10747	1.99498	5.18645	1.77398	2.96087	2.48839	2.96002	5.04681	3.25237	0.92444	4.67627
chr16_87812734_87813008	9.06364	7.055	4.43989	7.43492	4.42931	6.37691	10.6967	10.8861	2.56036	8.29404	8.24986	10.2559	2.46174	9.77727	5.10312	4.93457	9.82622	5.30321	4.33528	9.14872	8.86302	5.92083	4.66314	4.79423	4.10765	6.64483	7.97991	6.05086	11.5309	5.92174	6.6357	5.18003	9.25248	4.06546	8.31996	19.8741
chr16_88298315_88298515	4.53182	2.01571	2.66393	4.13051	3.54345	5.46592	3.88971	3.62869	5.97418	3.68624	4.58326	13.9853	3.69261	3.91091	5.10312	1.97383	4.91311	1.76774	6.50292	3.04957	3.32363	1.69166	4.66314	3.83538	5.13456	5.53736	4.98744	3.45763	2.66097	3.94782	1.65893	2.96002	2.5234	2.43928	0.92444	2.33813
chr16_89627772_89627972	4.53182	7.055	2.66393	3.30441	3.54345	4.55493	5.83456	5.44304	1.70691	0	3.66661	6.52648	4.92348	3.91091	12.7578	4.93457	2.45655	3.53548	2.16764	4.0661	3.32363	9.30416	4.66314	2.87654	7.18839	7.75231	2.99247	4.32204	6.20893	2.96087	5.80624	4.44003	1.68227	1.62618	3.69776	3.5072
chr16_89788492_89788701	4.53182	6.04714	1.77596	4.13051	9.74449	4.55493	4.86213	9.07174	6.82764	4.6078	4.58326	5.59413	4.92348	9.77727	7.65468	2.96074	7.36966	7.07095	3.25146	3.04957	3.32363	4.22916	6.5284	3.83538	2.05382	6.64483	13.9648	2.59323	9.75688	3.94782	3.31785	7.40005	5.88794	6.50474	5.54664	3.5072
chr16_90183466_90183720	1.13295	1.00786	0.887978	0	0	0	2.91728	0	0	0.92156	1.8333	1.86471	0	0.977727	0.85052	0.986915	0	0	0	1.01652	0	0	0	1.91769	0	1.10747	0	1.72882	0.886989	0	0	0.740005	0	0.813092	0	0
chr17_744558_744887	11.3295	18.1414	16.8716	21.4786	15.9455	12.7538	12.6415	9.07174	14.5087	12.9018	17.4164	8.39119	11.0778	12.7104	12.7578	15.7906	12.2828	9.72256	6.50292	10.1652	14.4024	14.3791	10.2589	8.62962	4.10765	13.2897	10.9724	11.2373	11.5309	7.89565	13.2714	7.40005	14.2993	11.3833	11.0933	7.0144
chr17_1993071_1993358	4.53182	4.03143	1.77596	2.47831	3.54345	2.73296	1.94485	3.62869	4.26727	3.68624	6.41656	0.932354	4.92348	1.95545	15.3094	7.89532	2.45655	3.53548	6.50292	2.03305	2.21575	5.07499	2.79788	5.75308	2.05382	4.42989	4.98744	1.72882	4.43495	1.97391	4.97678	2.96002	8.41135	5.69165	5.54664	4.67627
chr17_3183006_3183206	5.66477	1.00786	4.43989	4.13051	5.31517	13.6648	3.88971	1.81435	5.12073	3.68624	4.58326	3.72942	7.38523	2.93318	5.10312	5.92149	4.91311	2.65161	7.58674	3.04957	2.21575	4.22916	1.86526	1.91769	4.10765	1.10747	2.99247	2.59323	7.09591	1.97391	3.31785	1.48001	3.36454	4.06546	6.47108	1.16907
chr17_4332306_4332506	1.13295	4.03143	2.66393	7.43492	8.85862	3.64395	12.6415	2.72152	5.97418	2.76468	0.916652	1.86471	7.38523	4.88863	1.70104	7.89532	3.68483	0.883869	1.08382	6.09915	2.21575	4.22916	3.73051	5.75308	1.02691	5.53736	3.98995	3.45763	8.86989	3.94782	3.31785	5.18003	7.57021	8.13092	3.69776	4.67627
chr17_4851830_4852030	7.93068	11.0864	1.77596	4.95661	3.54345	7.28789	5.83456	2.72152	7.68109	2.76468	2.74995	5.59413	7.38523	4.88863	13.6083	4.93457	1.22828	3.53548	4.33528	4.0661	11.0788	5.07499	9.32628	2.87654	13.3499	3.32242	5.98493	4.32204	4.43495	2.96087	7.46517	5.92004	6.72908	7.31783	5.54664	4.67627
chr17_7307528_7307831	10.1966	2.01571	18.6475	13.2176	7.0869	7.28789	10.6967	7.25739	3.41382	7.37248	5.49991	2.79706	8.6161	6.84409	2.55156	8.88223	2.45655	1.76774	3.25146	4.0661	7.75514	4.22916	3.73051	8.62962	8.2153	7.75231	5.98493	4.32204	3.54796	3.94782	0.829463	11.1001	6.72908	10.5702	9.2444	4.67627
chr17_9245622_9245957	5.66477	7.055	5.32787	5.78271	6.20104	5.46592	0.972427	5.44304	4.26727	6.45092	9.16652	3.72942	6.15435	3.91091	4.2526	3.94766	3.68483	5.30321	2.16764	6.09915	3.32363	4.22916	6.5284	6.71192	3.08074	3.32242	14.9623	3.45763	4.43495	2.96087	3.31785	1.48001	2.5234	2.43928	4.6222	5.84534
chr17_9300691_9300891	2.26591	8.06285	2.66393	3.30441	3.54345	0.910987	1.94485	3.62869	8.53455	5.52936	1.8333	6.52648	2.46174	3.91091	3.40208	3.94766	3.68483	3.53548	4.33528	1.01652	14.4024	5.07499	3.73051	0.958846	1.02691	0	2.99247	4.32204	3.54796	4.93478	4.14732	4.44003	0.841135	3.25237	4.6222	2.33813
chr17_10974960_10975160	1.13295	6.04714	2.66393	1.6522	2.65759	1.82197	2.91728	2.72152	0.853455	1.84312	1.8333	1.86471	3.69261	2.93318	4.2526	2.96074	4.91311	0.883869	3.25146	2.03305	6.64726	3.38333	6.5284	5.75308	2.05382	1.10747	1.99498	4.32204	2.66097	4.93478	1.65893	3.70002	1.68227	4.06546	2.77332	14.0288
chr17_11891478_11891731	2.26591	2.01571	0.887978	2.47831	3.54345	2.73296	2.91728	4.53587	15.3622	2.76468	6.41656	4.66177	1.23087	3.91091	2.55156	1.97383	1.22828	7.07095	2.16764	8.1322	5.53938	3.38333	3.73051	4.79423	2.05382	4.42989	4.98744	6.91527	4.43495	2.96087	5.80624	5.18003	5.04681	3.25237	2.77332	10.5216
chr17_13967813_13968013	4.53182	2.01571	7.10383	3.30441	3.54345	1.82197	4.86213	7.25739	3.41382	4.6078	8.24986	1.86471	4.92348	4.88863	5.10312	11.843	1.22828	2.65161	3.25146	2.03305	14.4024	5.07499	1.86526	5.75308	4.10765	2.21494	2.99247	3.45763	2.66097	3.94782	5.80624	4.44003	2.5234	4.87855	4.6222	1.16907
chr17_15481849_15482049	2.26591	3.02357	3.55191	3.30441	2.65759	3.64395	2.91728	0	2.56036	4.6078	2.74995	3.72942	2.46174	0.977727	2.55156	2.96074	3.68483	1.76774	3.25146	1.01652	2.21575	2.5375	1.86526	0	2.05382	12.1822	3.98995	6.91527	1.77398	6.90869	4.14732	4.44003	0.841135	2.43928	5.54664	2.33813
chr17_15872971_15873191	6.79773	5.03928	1.77596	4.13051	3.54345	6.37691	0.972427	2.72152	2.56036	8.29404	5.49991	5.59413	0	3.91091	2.55156	2.96074	1.22828	6.18708	2.16764	4.0661	4.43151	0.845832	2.79788	2.87654	4.10765	7.75231	3.98995	3.45763	3.54796	2.96087	2.48839	2.96002	0.841135	5.69165	6.47108	12.8597
chr17_15970634_15970919	7.93068	3.02357	4.43989	4.95661	3.54345	6.37691	3.88971	2.72152	3.41382	1.84312	6.41656	2.79706	1.23087	6.84409	2.55156	4.93457	4.91311	6.18708	4.33528	10.1652	6.64726	4.22916	6.5284	5.75308	14.3768	9.96725	5.98493	6.05086	3.54796	5.92174	2.48839	5.18003	4.20567	2.43928	3.69776	8.18347
chr17_16713909_16714275	2.26591	2.01571	2.66393	7.43492	4.42931	5.46592	2.91728	6.35022	1.70691	5.52936	1.8333	3.72942	3.69261	1.95545	6.80416	3.94766	4.91311	6.18708	4.33528	7.11567	4.43151	5.07499	1.86526	6.71192	3.08074	0	1.99498	3.45763	3.54796	4.93478	4.14732	2.22001	3.36454	4.06546	4.6222	16.3669
chr17_17524083_17524283	13.5955	6.04714	2.66393	4.13051	7.0869	7.28789	2.91728	5.44304	2.56036	1.84312	2.74995	0	4.92348	6.84409	5.95364	4.93457	1.22828	6.18708	6.50292	4.0661	5.53938	3.38333	0	1.91769	5.13456	2.21494	4.98744	3.45763	0.886989	3.94782	3.31785	3.70002	1.68227	4.87855	2.77332	3.5072
chr17_18534333_18534533	0	0	1.77596	4.95661	3.54345	4.55493	2.91728	3.62869	2.56036	2.76468	1.8333	2.79706	2.46174	3.91091	4.2526	0	1.22828	0.883869	3.25146	3.04957	9.97089	5.92083	3.73051	1.91769	3.08074	2.21494	2.99247	1.72882	7.09591	0.986956	1.65893	0.740005	3.36454	4.06546	5.54664	1.16907
chr17_20705970_20706221	2.26591	4.03143	14.2077	9.08712	6.20104	4.55493	2.91728	7.25739	3.41382	2.76468	3.66661	6.52648	0	3.91091	4.2526	4.93457	4.91311	4.41934	4.33528	3.04957	4.43151	5.92083	2.79788	3.83538	4.10765	4.42989	5.98493	4.32204	5.32194	6.90869	4.97678	2.96002	4.20567	1.62618	1.84888	2.33813
chr17_21409758_21409958	5.66477	6.04714	5.32787	1.6522	3.54345	7.28789	3.88971	6.35022	2.56036	4.6078	1.8333	4.66177	4.92348	1.95545	3.40208	9.86915	4.91311	4.41934	1.08382	5.08262	2.21575	1.69166	2.79788	5.75308	13.3499	3.32242	2.99247	2.59323	3.54796	4.93478	2.48839	2.96002	5.88794	2.43928	3.69776	7.0144
chr17_25332868_25333068	5.66477	7.055	7.9918	2.47831	6.20104	4.55493	0.972427	13.6076	10.2415	7.37248	7.33321	4.66177	17.2322	4.88863	4.2526	1.97383	7.36966	4.41934	6.50292	7.11567	6.64726	10.9958	7.46102	3.83538	5.13456	9.96725	4.98744	8.64408	1.77398	2.96087	5.80624	5.18003	4.20567	5.69165	3.69776	4.67627
chr17_25338024_25338242	1.13295	1.00786	2.66393	1.6522	6.20104	2.73296	8.75184	1.81435	3.41382	3.68624	2.74995	4.66177	1.23087	2.93318	1.70104	0.986915	1.22828	2.65161	3.25146	2.03305	1.10788	0	3.73051	1.91769	5.13456	4.42989	3.98995	3.45763	1.77398	1.97391	0.829463	0.740005	2.5234	0.813092	0.92444	2.33813
chr17_25735489_25735689	1.13295	5.03928	1.77596	3.30441	1.77172	12.7538	4.86213	4.53587	5.12073	3.68624	3.66661	4.66177	2.46174	0.977727	4.2526	0.986915	2.45655	6.18708	0	1.01652	7.75514	3.38333	5.59577	2.87654	13.3499	2.21494	2.99247	1.72882	0	6.90869	1.65893	4.44003	3.36454	4.87855	2.77332	2.33813
chr17_26423101_26423301	4.53182	6.04714	5.32787	5.78271	2.65759	3.64395	2.91728	1.81435	3.41382	5.52936	3.66661	0.932354	3.69261	0.977727	2.55156	3.94766	4.91311	0	14.0897	7.11567	3.32363	8.45832	0.932628	5.75308	7.18839	2.21494	5.98493	4.32204	2.66097	4.93478	0.829463	6.66004	1.68227	4.87855	2.77332	2.33813
chr17_27619891_27620110	6.79773	6.04714	7.9918	7.43492	7.0869	4.55493	10.6967	4.53587	12.8018	1.84312	4.58326	5.59413	4.92348	6.84409	2.55156	7.89532	3.68483	4.41934	1.08382	3.04957	7.75514	3.38333	4.66314	6.71192	6.16147	5.53736	1.99498	4.32204	6.20893	7.89565	8.29463	8.14005	5.88794	5.69165	6.47108	4.67627
chr17_27942614_27942814	1.13295	8.06285	4.43989	4.13051	6.20104	7.28789	13.614	9.07174	7.68109	7.37248	7.33321	2.79706	3.69261	3.91091	5.95364	5.92149	3.68483	2.65161	2.16764	9.14872	4.43151	8.45832	7.46102	3.83538	7.18839	3.32242	9.97489	2.59323	1.77398	6.90869	6.6357	7.40005	4.20567	4.87855	3.69776	8.18347
chr17_28843025_28843293	4.53182	4.03143	1.77596	1.6522	3.54345	7.28789	1.94485	3.62869	4.26727	2.76468	3.66661	4.66177	3.69261	1.95545	5.95364	4.93457	4.91311	4.41934	2.16764	3.04957	5.53938	3.38333	1.86526	2.87654	5.13456	2.21494	14.9623	5.18645	5.32194	0.986956	4.14732	2.22001	5.88794	0.813092	8.31996	4.67627
chr17_29113637_29113837	0	3.02357	3.55191	5.78271	4.42931	0.910987	0	1.81435	2.56036	3.68624	3.66661	3.72942	1.23087	4.88863	1.70104	5.92149	4.91311	4.41934	2.16764	3.04957	0	4.22916	1.86526	4.79423	4.10765	5.53736	1.99498	3.45763	2.66097	0.986956	2.48839	0.740005	2.5234	1.62618	2.77332	12.8597
chr17_29148490_29148690	2.26591	1.00786	2.66393	1.6522	5.31517	0.910987	2.91728	3.62869	3.41382	0.92156	3.66661	3.72942	0	4.88863	0.85052	2.96074	2.45655	3.53548	3.25146	7.11567	3.32363	2.5375	4.66314	4.79423	3.08074	0	13.9648	3.45763	2.66097	3.94782	2.48839	3.70002	5.88794	4.06546	4.6222	3.5072
chr17_29398351_29398551	1.13295	6.04714	3.55191	3.30441	3.54345	4.55493	13.614	1.81435	1.70691	2.76468	2.74995	6.52648	2.46174	6.84409	5.10312	7.89532	6.14139	4.41934	3.25146	4.0661	5.53938	7.61249	5.59577	2.87654	5.13456	3.32242	2.99247	1.72882	3.54796	2.96087	3.31785	2.96002	0.841135	5.69165	1.84888	3.5072
chr17_29439655_29439855	1.13295	2.01571	3.55191	4.13051	5.31517	3.64395	1.94485	0	11.0949	2.76468	2.74995	6.52648	2.46174	6.84409	5.10312	3.94766	2.45655	6.18708	2.16764	1.01652	4.43151	1.69166	2.79788	3.83538	8.2153	3.32242	1.99498	4.32204	3.54796	0.986956	3.31785	1.48001	5.04681	3.25237	3.69776	3.5072
chr17_29519716_29519934	15.8614	1.00786	1.77596	0.826102	0.885862	2.73296	1.94485	7.25739	4.26727	7.37248	2.74995	0	6.15435	2.93318	6.80416	1.97383	3.68483	7.95482	4.33528	3.04957	4.43151	7.61249	3.73051	8.62962	7.18839	2.21494	3.98995	4.32204	2.66097	3.94782	2.48839	0.740005	7.57021	4.06546	3.69776	4.67627
chr17_29702734_29702948	2.26591	5.03928	3.55191	3.30441	7.0869	1.82197	4.86213	1.81435	3.41382	5.52936	1.8333	13.053	6.15435	4.88863	0.85052	3.94766	4.91311	6.18708	5.4191	3.04957	4.43151	3.38333	8.39365	4.79423	3.08074	2.21494	2.99247	2.59323	0.886989	3.94782	3.31785	1.48001	5.88794	2.43928	4.6222	3.5072
chr17_30349105_30349339	2.26591	7.055	7.10383	2.47831	8.85862	5.46592	4.86213	1.81435	2.56036	6.45092	4.58326	2.79706	17.2322	2.93318	3.40208	4.93457	4.91311	4.41934	7.58674	3.04957	4.43151	1.69166	6.5284	4.79423	1.02691	5.53736	2.99247	6.05086	3.54796	3.94782	5.80624	3.70002	2.5234	4.87855	0.92444	2.33813
chr17_33529936_33530136	3.39886	1.00786	1.77596	2.47831	3.54345	0	1.94485	1.81435	0.853455	2.76468	1.8333	1.86471	3.69261	0	1.70104	1.97383	0	2.65161	2.16764	0	0	4.22916	2.79788	0	1.02691	2.21494	2.99247	0.864408	4.43495	0.986956	1.65893	0.740005	1.68227	1.62618	1.84888	7.0144
chr17_34042792_34042992	7.93068	5.03928	4.43989	6.60881	3.54345	1.82197	11.6691	3.62869	4.26727	1.84312	3.66661	3.72942	4.92348	3.91091	1.70104	6.9084	7.36966	3.53548	2.16764	5.08262	0	4.22916	2.79788	7.67077	5.13456	3.32242	3.98995	1.72882	5.32194	5.92174	2.48839	5.18003	4.20567	0.813092	5.54664	3.5072
chr17_34437331_34437531	1.13295	4.03143	2.66393	3.30441	1.77172	0.910987	10.6967	10.8861	0.853455	2.76468	2.74995	3.72942	1.23087	3.91091	6.80416	0.986915	4.91311	7.07095	3.25146	2.03305	4.43151	0.845832	5.59577	2.87654	5.13456	4.42989	0	7.77968	0.886989	3.94782	2.48839	7.40005	5.04681	4.06546	0.92444	0
chr17_35094405_35094657	14.7284	1.00786	1.77596	2.47831	0.885862	4.55493	7.77942	2.72152	4.26727	6.45092	2.74995	4.66177	6.15435	2.93318	1.70104	2.96074	3.68483	9.72256	5.4191	5.08262	5.53938	2.5375	5.59577	6.71192	6.16147	0	3.98995	5.18645	7.9829	3.94782	7.46517	2.22001	2.5234	3.25237	2.77332	5.84534
chr17_35866723_35866923	2.26591	5.03928	4.43989	3.30441	4.42931	3.64395	5.83456	3.62869	3.41382	4.6078	4.58326	3.72942	9.84697	0.977727	4.2526	5.92149	2.45655	0.883869	4.33528	3.04957	3.32363	1.69166	5.59577	3.83538	12.3229	3.32242	4.98744	0.864408	1.77398	2.96087	4.97678	4.44003	5.04681	5.69165	4.6222	4.67627
chr17_35910162_35910442	6.79773	3.02357	3.55191	6.60881	3.54345	1.82197	14.5864	6.35022	5.12073	3.68624	3.66661	1.86471	0	1.95545	4.2526	3.94766	6.14139	7.95482	4.33528	6.09915	4.43151	2.5375	0.932628	6.71192	3.08074	1.10747	3.98995	4.32204	8.86989	3.94782	2.48839	6.66004	2.5234	4.06546	0.92444	5.84534
chr17_37514839_37515039	3.39886	6.04714	1.77596	4.95661	3.54345	12.7538	2.91728	0.907174	3.41382	2.76468	4.58326	4.66177	3.69261	5.86636	1.70104	4.93457	4.91311	4.41934	0	2.03305	4.43151	5.92083	5.59577	1.91769	4.10765	4.42989	1.99498	7.77968	5.32194	4.93478	3.31785	2.22001	6.72908	7.31783	1.84888	5.84534
chr17_38253327_38253547	5.66477	1.00786	6.21585	4.13051	0	1.82197	6.80699	5.44304	1.70691	5.52936	7.33321	6.52648	7.38523	7.82182	13.6083	0.986915	2.45655	2.65161	6.50292	3.04957	4.43151	2.5375	5.59577	1.91769	4.10765	5.53736	4.98744	5.18645	5.32194	0.986956	4.14732	1.48001	5.04681	2.43928	3.69776	7.0144
chr17_40177639_40177859	15.8614	3.02357	0.887978	1.6522	6.20104	5.46592	4.86213	6.35022	2.56036	5.52936	3.66661	2.79706	3.69261	3.91091	7.65468	3.94766	3.68483	2.65161	1.08382	3.04957	9.97089	2.5375	13.0568	5.75308	2.05382	3.32242	6.98242	5.18645	1.77398	1.97391	1.65893	3.70002	2.5234	1.62618	2.77332	3.5072
chr17_40536432_40536632	0	6.04714	2.66393	1.6522	3.54345	1.82197	11.6691	0.907174	1.70691	1.84312	2.74995	5.59413	3.69261	4.88863	6.80416	3.94766	3.68483	3.53548	2.16764	7.11567	3.32363	4.22916	4.66314	1.91769	5.13456	2.21494	3.98995	2.59323	7.09591	3.94782	4.14732	4.44003	3.36454	3.25237	0.92444	4.67627
chr17_41475336_41475536	9.06364	5.03928	2.66393	3.30441	5.31517	2.73296	0	4.53587	0.853455	2.76468	4.58326	2.79706	2.46174	0.977727	1.70104	0.986915	1.22828	5.30321	13.0058	2.03305	0	3.38333	0.932628	1.91769	2.05382	4.42989	3.98995	2.59323	0.886989	2.96087	4.97678	2.22001	2.5234	4.87855	3.69776	4.67627
chr17_41781125_41781412	4.53182	5.03928	3.55191	4.95661	5.31517	5.46592	3.88971	4.53587	2.56036	0.92156	1.8333	3.72942	6.15435	0.977727	17.0104	3.94766	1.22828	0.883869	4.33528	5.08262	6.64726	5.07499	5.59577	3.83538	7.18839	6.64483	2.99247	4.32204	3.54796	2.96087	7.46517	5.92004	5.04681	2.43928	4.6222	2.33813
chr17_42259693_42259927	6.79773	3.02357	1.77596	2.47831	2.65759	2.73296	5.83456	3.62869	5.97418	4.6078	2.74995	1.86471	7.38523	0.977727	12.7578	4.93457	1.22828	6.18708	7.58674	3.04957	4.43151	4.22916	5.59577	4.79423	7.18839	6.64483	2.99247	5.18645	4.43495	4.93478	5.80624	4.44003	0.841135	4.87855	2.77332	2.33813
chr17_42358940_42359140	2.26591	4.03143	3.55191	3.30441	3.54345	4.55493	3.88971	0.907174	3.41382	4.6078	5.49991	8.39119	6.15435	2.93318	4.2526	0.986915	4.91311	7.95482	4.33528	4.0661	4.43151	2.5375	4.66314	0.958846	5.13456	7.75231	0	0.864408	2.66097	3.94782	1.65893	8.88006	0.841135	1.62618	4.6222	15.1979
chr17_43508364_43508564	3.39886	1.00786	2.66393	4.95661	2.65759	3.64395	0.972427	10.8861	3.41382	3.68624	6.41656	1.86471	4.92348	3.91091	3.40208	2.96074	7.36966	2.65161	5.4191	4.0661	2.21575	4.22916	0.932628	5.75308	5.13456	13.2897	2.99247	6.05086	5.32194	2.96087	1.65893	5.92004	4.20567	4.06546	6.47108	2.33813
chr17_44248306_44248525	5.66477	7.055	10.6557	4.95661	7.97276	4.55493	5.83456	19.0506	8.53455	9.2156	8.24986	9.32354	3.69261	3.91091	3.40208	7.89532	11.0545	5.30321	7.58674	3.04957	4.43151	5.07499	7.46102	0.958846	10.2691	5.53736	7.97991	6.91527	4.43495	9.86956	4.14732	8.14005	8.41135	8.13092	5.54664	2.33813
chr17_44577871_44578092	6.79773	8.06285	6.21585	6.60881	2.65759	1.82197	6.80699	6.35022	6.82764	4.6078	10.0832	2.79706	6.15435	4.88863	5.10312	8.88223	9.82622	5.30321	15.1735	7.11567	7.75514	4.22916	5.59577	9.58846	5.13456	5.53736	6.98242	6.91527	7.09591	8.88261	3.31785	5.18003	8.41135	6.50474	4.6222	12.8597
chr17_46165749_46165999	14.7284	3.02357	6.21585	6.60881	1.77172	5.46592	1.94485	3.62869	4.26727	8.29404	2.74995	4.66177	2.46174	3.91091	5.10312	3.94766	3.68483	0.883869	2.16764	4.0661	3.32363	2.5375	7.46102	1.91769	9.24221	4.42989	7.97991	5.18645	3.54796	2.96087	0.829463	2.22001	4.20567	7.31783	8.31996	2.33813
chr17_46794546_46794746	6.79773	5.03928	1.77596	4.95661	3.54345	2.73296	4.86213	1.81435	1.70691	2.76468	4.58326	1.86471	2.46174	7.82182	2.55156	4.93457	4.91311	4.41934	4.33528	2.03305	3.32363	2.5375	4.66314	5.75308	5.13456	4.42989	4.98744	5.18645	0.886989	12.8304	1.65893	5.92004	2.5234	4.06546	3.69776	7.0144
chr17_47903884_47904139	5.66477	7.055	4.43989	11.5654	2.65759	6.37691	5.83456	7.25739	1.70691	3.68624	4.58326	3.72942	6.15435	4.88863	3.40208	6.9084	4.91311	7.07095	2.16764	4.0661	1.10788	4.22916	3.73051	7.67077	3.08074	7.75231	2.99247	8.64408	5.32194	4.93478	4.14732	2.96002	2.5234	7.31783	3.69776	16.3669
chr17_48231262_48231505	2.26591	6.04714	4.43989	3.30441	4.42931	0.910987	1.94485	2.72152	5.97418	3.68624	9.16652	2.79706	3.69261	5.86636	2.55156	4.93457	2.45655	2.65161	5.4191	3.04957	5.53938	3.38333	5.59577	1.91769	3.08074	5.53736	15.9598	0	5.32194	0.986956	5.80624	2.22001	5.04681	4.06546	3.69776	3.5072
chr17_48946278_48946478	3.39886	4.03143	0.887978	3.30441	5.31517	2.73296	0.972427	3.62869	2.56036	2.76468	1.8333	3.72942	1.23087	4.88863	1.70104	2.96074	11.0545	7.95482	13.0058	4.0661	6.64726	3.38333	7.46102	6.71192	9.24221	0	9.97489	3.45763	2.66097	4.93478	5.80624	3.70002	4.20567	5.69165	3.69776	8.18347
chr17_49232688_49232936	4.53182	3.02357	4.43989	4.95661	4.42931	5.46592	1.94485	2.72152	5.12073	6.45092	7.33321	3.72942	6.15435	4.88863	1.70104	1.97383	6.14139	3.53548	6.50292	2.03305	7.75514	6.76666	5.59577	5.75308	15.4037	4.42989	1.99498	5.18645	0.886989	2.96087	5.80624	3.70002	5.04681	4.87855	3.69776	3.5072
chr17_53018272_53018503	9.06364	1.00786	7.10383	5.78271	3.54345	3.64395	12.6415	4.53587	3.41382	4.6078	1.8333	0.932354	4.92348	2.93318	0.85052	3.94766	2.45655	2.65161	2.16764	6.09915	5.53938	1.69166	5.59577	2.87654	3.08074	3.32242	7.97991	4.32204	4.43495	1.97391	4.14732	4.44003	4.20567	0.813092	2.77332	3.5072
chr17_54768260_54768498	4.53182	3.02357	2.66393	2.47831	2.65759	1.82197	4.86213	4.53587	0.853455	5.52936	3.66661	2.79706	3.69261	2.93318	1.70104	2.96074	4.91311	4.41934	4.33528	4.0661	3.32363	5.07499	6.5284	3.83538	13.3499	4.42989	2.99247	1.72882	0.886989	4.93478	3.31785	2.96002	5.88794	4.87855	0.92444	2.33813
chr17_54962973_54963179	4.53182	3.02357	1.77596	3.30441	1.77172	2.73296	4.86213	0.907174	3.41382	4.6078	5.49991	1.86471	1.23087	4.88863	4.2526	1.97383	2.45655	4.41934	1.08382	4.0661	16.6182	5.07499	2.79788	1.91769	2.05382	3.32242	2.99247	3.45763	4.43495	1.97391	1.65893	1.48001	3.36454	3.25237	2.77332	4.67627
chr17_55038764_55039000	4.53182	7.055	4.43989	4.95661	3.54345	4.55493	4.86213	2.72152	7.68109	2.76468	6.41656	4.66177	4.92348	5.86636	12.7578	7.89532	4.91311	7.07095	2.16764	8.1322	7.75514	1.69166	5.59577	6.71192	6.16147	2.21494	5.98493	2.59323	3.54796	5.92174	2.48839	3.70002	5.04681	4.87855	3.69776	3.5072
chr17_55927405_55927605	13.5955	7.055	6.21585	7.43492	7.0869	7.28789	3.88971	5.44304	5.97418	4.6078	4.58326	5.59413	2.46174	5.86636	1.70104	6.9084	9.82622	2.65161	3.25146	3.04957	3.32363	6.76666	4.66314	5.75308	4.10765	4.42989	5.98493	3.45763	4.43495	3.94782	4.14732	4.44003	1.68227	4.87855	4.6222	4.67627
chr17_56203578_56203778	3.39886	4.03143	3.55191	4.13051	3.54345	3.64395	3.88971	3.62869	4.26727	4.6078	3.66661	5.59413	4.92348	2.93318	5.10312	5.92149	2.45655	2.65161	13.0058	3.04957	3.32363	2.5375	5.59577	1.91769	4.10765	1.10747	2.99247	6.05086	6.20893	0.986956	0	0.740005	7.57021	2.43928	1.84888	2.33813
chr17_56885588_56885788	3.39886	8.06285	3.55191	3.30441	1.77172	12.7538	7.77942	4.53587	2.56036	6.45092	4.58326	3.72942	2.46174	4.88863	3.40208	3.94766	1.22828	3.53548	3.25146	3.04957	3.32363	6.76666	0.932628	0	2.05382	4.42989	5.98493	3.45763	1.77398	3.94782	7.46517	1.48001	3.36454	3.25237	6.47108	4.67627
chr17_58172885_58173085	2.26591	5.03928	1.77596	3.30441	6.20104	4.55493	0	2.72152	2.56036	7.37248	4.58326	2.79706	2.46174	1.95545	3.40208	4.93457	1.22828	4.41934	7.58674	3.04957	3.32363	5.92083	3.73051	1.91769	13.3499	4.42989	2.99247	0.864408	6.20893	2.96087	2.48839	3.70002	4.20567	4.06546	4.6222	1.16907
chr17_58469604_58469845	7.93068	6.04714	10.6557	6.60881	5.31517	11.8428	7.77942	9.97891	6.82764	16.5881	11.9165	7.45883	6.15435	4.88863	5.10312	7.89532	6.14139	7.07095	3.25146	3.04957	9.97089	6.76666	8.39365	6.71192	6.16147	7.75231	6.98242	9.50849	4.43495	6.90869	7.46517	7.40005	10.9348	6.50474	9.2444	8.18347
chr17_60056041_60056241	13.5955	2.01571	1.77596	2.47831	3.54345	4.55493	7.77942	3.62869	5.12073	3.68624	1.8333	3.72942	6.15435	1.95545	1.70104	2.96074	3.68483	3.53548	3.25146	5.08262	2.21575	2.5375	1.86526	3.83538	3.08074	5.53736	2.99247	5.18645	3.54796	3.94782	0.829463	2.22001	5.88794	2.43928	7.39552	2.33813
chr17_61945911_61946122	2.26591	2.01571	0	1.6522	4.42931	3.64395	4.86213	3.62869	2.56036	8.29404	2.74995	2.79706	3.69261	0.977727	0.85052	3.94766	3.68483	0	4.33528	7.11567	1.10788	0.845832	2.79788	0.958846	3.08074	2.21494	6.98242	1.72882	1.77398	12.8304	2.48839	5.18003	4.20567	4.06546	6.47108	2.33813
chr17_62098477_62098677	11.3295	3.02357	0.887978	5.78271	2.65759	2.73296	1.94485	6.35022	1.70691	6.45092	3.66661	1.86471	0	1.95545	0.85052	2.96074	2.45655	3.53548	5.4191	3.04957	0	2.5375	1.86526	7.67077	2.05382	3.32242	4.98744	1.72882	2.66097	1.97391	4.97678	2.22001	1.68227	10.5702	5.54664	2.33813
chr17_63036431_63036636	0	3.02357	7.9918	2.47831	6.20104	1.82197	1.94485	4.53587	2.56036	3.68624	3.66661	3.72942	0	4.88863	14.4588	6.9084	3.68483	6.18708	3.25146	4.0661	3.32363	6.76666	2.79788	2.87654	4.10765	5.53736	0.997489	4.32204	3.54796	5.92174	5.80624	2.22001	5.04681	5.69165	3.69776	4.67627
chr17_64069525_64069725	1.13295	3.02357	2.66393	3.30441	0.885862	1.82197	3.88971	2.72152	1.70691	4.6078	2.74995	1.86471	2.46174	4.88863	1.70104	2.96074	0	3.53548	14.0897	2.03305	3.32363	2.5375	1.86526	4.79423	2.05382	4.42989	1.99498	6.05086	8.86989	0	3.31785	2.96002	2.5234	1.62618	1.84888	4.67627
chr17_65796739_65796954	0	3.02357	2.66393	4.13051	6.20104	3.64395	13.614	1.81435	3.41382	4.6078	4.58326	6.52648	8.6161	3.91091	3.40208	0	4.91311	3.53548	4.33528	8.1322	2.21575	3.38333	4.66314	9.58846	5.13456	7.75231	3.98995	6.91527	1.77398	6.90869	4.14732	2.96002	0.841135	3.25237	4.6222	2.33813
chr17_66276710_66276910	2.26591	3.02357	6.21585	3.30441	4.42931	3.64395	2.91728	4.53587	4.26727	6.45092	4.58326	1.86471	2.46174	3.91091	11.9073	3.94766	4.91311	6.18708	2.16764	3.04957	6.64726	2.5375	0.932628	0.958846	4.10765	3.32242	4.98744	2.59323	3.54796	4.93478	2.48839	4.44003	3.36454	2.43928	5.54664	4.67627
chr17_66865096_66865296	2.26591	6.04714	3.55191	2.47831	5.31517	4.55493	4.86213	12.7004	2.56036	4.6078	2.74995	2.79706	1.23087	2.93318	4.2526	0	6.14139	4.41934	3.25146	4.0661	2.21575	2.5375	1.86526	5.75308	2.05382	5.53736	5.98493	1.72882	2.66097	3.94782	4.97678	2.22001	5.04681	6.50474	1.84888	8.18347
chr17_68641235_68641435	3.39886	5.03928	4.43989	5.78271	4.42931	3.64395	3.88971	2.72152	2.56036	2.76468	4.58326	5.59413	6.15435	3.91091	2.55156	0.986915	2.45655	2.65161	2.16764	2.03305	1.10788	1.69166	2.79788	2.87654	3.08074	4.42989	3.98995	3.45763	3.54796	14.8043	5.80624	3.70002	3.36454	6.50474	5.54664	5.84534
chr17_68928822_68929025	2.26591	5.03928	4.43989	4.95661	4.42931	2.73296	0.972427	2.72152	0.853455	6.45092	4.58326	1.86471	0	1.95545	5.95364	1.97383	2.45655	2.65161	3.25146	3.04957	2.21575	1.69166	3.73051	4.79423	3.08074	3.32242	12.9674	1.72882	1.77398	1.97391	3.31785	2.96002	3.36454	2.43928	5.54664	2.33813
chr17_69974895_69975095	4.53182	1.00786	3.55191	0.826102	7.97276	2.73296	1.94485	3.62869	5.97418	4.6078	0.916652	4.66177	1.23087	2.93318	3.40208	1.97383	3.68483	3.53548	2.16764	2.03305	5.53938	1.69166	0.932628	1.91769	13.3499	3.32242	1.99498	3.45763	4.43495	1.97391	4.14732	0.740005	4.20567	2.43928	3.69776	1.16907
chr17_70793757_70793961	4.53182	2.01571	13.3197	4.13051	6.20104	2.73296	0	2.72152	2.56036	4.6078	1.8333	4.66177	2.46174	1.95545	2.55156	3.94766	3.68483	5.30321	6.50292	1.01652	4.43151	4.22916	3.73051	1.91769	4.10765	2.21494	1.99498	5.18645	2.66097	2.96087	5.80624	0.740005	2.5234	1.62618	0	1.16907
chr17_71586158_71586358	0	2.01571	3.55191	2.47831	2.65759	1.82197	3.88971	2.72152	2.56036	3.68624	5.49991	3.72942	0	2.93318	5.10312	1.97383	2.45655	1.76774	13.0058	4.0661	2.21575	2.5375	12.1242	1.91769	2.05382	4.42989	2.99247	1.72882	5.32194	6.90869	3.31785	2.96002	3.36454	6.50474	3.69776	0
chr17_71640847_71641086	5.66477	4.03143	3.55191	4.95661	4.42931	2.73296	5.83456	3.62869	2.56036	7.37248	10.0832	4.66177	4.92348	2.93318	10.2062	4.93457	3.68483	5.30321	4.33528	3.04957	2.21575	2.5375	3.73051	3.83538	3.08074	3.32242	13.9648	6.05086	5.32194	5.92174	4.14732	2.96002	5.04681	8.13092	3.69776	7.0144
chr17_72483188_72483391	4.53182	3.02357	3.55191	2.47831	3.54345	2.73296	1.94485	1.81435	3.41382	6.45092	0.916652	1.86471	3.69261	1.95545	1.70104	0.986915	6.14139	1.76774	2.16764	4.0661	5.53938	5.07499	4.66314	3.83538	1.02691	3.32242	1.99498	5.18645	3.54796	1.97391	4.14732	2.96002	2.5234	4.87855	1.84888	14.0288
chr17_73042426_73042644	2.26591	5.03928	6.21585	4.13051	4.42931	6.37691	4.86213	2.72152	3.41382	3.68624	1.8333	8.39119	4.92348	3.91091	1.70104	2.96074	2.45655	6.18708	3.25146	5.08262	13.2945	1.69166	2.79788	3.83538	1.02691	2.21494	4.98744	4.32204	8.86989	4.93478	7.46517	9.62006	5.88794	5.69165	4.6222	5.84534
chr17_73470026_73470226	1.13295	4.03143	4.43989	4.13051	2.65759	4.55493	12.6415	5.44304	4.26727	2.76468	3.66661	2.79706	7.38523	3.91091	3.40208	1.97383	4.91311	3.53548	2.16764	4.0661	6.64726	3.38333	2.79788	6.71192	2.05382	4.42989	0	5.18645	4.43495	1.97391	5.80624	1.48001	1.68227	5.69165	3.69776	2.33813
chr17_74141123_74141323	0	4.03143	2.66393	4.13051	2.65759	4.55493	1.94485	2.72152	1.70691	7.37248	4.58326	3.72942	6.15435	2.93318	8.5052	2.96074	2.45655	5.30321	13.0058	3.04957	2.21575	2.5375	4.66314	4.79423	6.16147	5.53736	6.98242	4.32204	4.43495	5.92174	4.14732	1.48001	4.20567	2.43928	3.69776	3.5072
chr17_74380501_74380707	6.79773	4.03143	3.55191	8.26102	9.74449	9.10987	6.80699	5.44304	11.9484	4.6078	9.16652	5.59413	8.6161	3.91091	4.2526	6.9084	8.59794	4.41934	9.75439	9.14872	12.1866	5.07499	5.59577	7.67077	4.10765	9.96725	4.98744	6.05086	9.75688	6.90869	6.6357	8.88006	7.57021	7.31783	8.31996	5.84534
chr17_74694965_74695165	7.93068	5.03928	6.21585	5.78271	4.42931	1.82197	2.91728	0.907174	0	5.52936	0	4.66177	0	0	2.55156	2.96074	7.36966	7.95482	15.1735	7.11567	5.53938	3.38333	3.73051	4.79423	1.02691	4.42989	2.99247	2.59323	2.66097	2.96087	2.48839	5.92004	3.36454	1.62618	1.84888	0
chr17_76126709_76126936	2.26591	3.02357	6.21585	2.47831	7.0869	7.28789	3.88971	5.44304	5.12073	9.2156	1.8333	4.66177	2.46174	4.88863	7.65468	3.94766	6.14139	6.18708	4.33528	9.14872	3.32363	4.22916	2.79788	3.83538	3.08074	2.21494	3.98995	3.45763	4.43495	7.89565	4.97678	2.96002	5.04681	3.25237	2.77332	15.1979
chr17_76691419_76691619	2.26591	4.03143	2.66393	4.13051	1.77172	13.6648	4.86213	3.62869	5.97418	5.52936	3.66661	3.72942	3.69261	3.91091	5.10312	3.94766	6.14139	4.41934	2.16764	0	3.32363	3.38333	3.73051	3.83538	7.18839	2.21494	2.99247	3.45763	0	4.93478	3.31785	5.18003	3.36454	7.31783	5.54664	2.33813
chr17_76706147_76706395	14.7284	0	1.77596	3.30441	1.77172	1.82197	5.83456	3.62869	0.853455	4.6078	1.8333	2.79706	4.92348	7.82182	5.95364	2.96074	6.14139	7.95482	4.33528	2.03305	5.53938	5.07499	4.66314	6.71192	3.08074	2.21494	3.98995	4.32204	5.32194	3.94782	4.14732	2.96002	4.20567	4.87855	6.47108	3.5072
chr17_78122029_78122264	7.93068	5.03928	3.55191	5.78271	6.20104	4.55493	0.972427	0	3.41382	6.45092	2.74995	10.2559	1.23087	3.91091	2.55156	3.94766	4.91311	3.53548	2.16764	5.08262	5.53938	4.22916	2.79788	8.62962	3.08074	15.5046	2.99247	4.32204	3.54796	1.97391	6.6357	1.48001	5.04681	4.06546	0	5.84534
chr17_79829349_79829551	4.53182	5.03928	5.32787	9.91322	5.31517	5.46592	4.86213	6.35022	9.388	4.6078	10.9998	13.9853	18.4631	3.91091	3.40208	10.8561	6.14139	4.41934	4.33528	9.14872	4.43151	5.92083	3.73051	3.83538	6.16147	2.21494	4.98744	9.50849	7.09591	7.89565	3.31785	3.70002	10.0936	4.06546	1.84888	3.5072
chr17_79899623_79899823	4.53182	3.02357	4.43989	6.60881	3.54345	2.73296	5.83456	2.72152	3.41382	8.29404	8.24986	1.86471	6.15435	4.88863	3.40208	1.97383	4.91311	1.76774	5.4191	3.04957	4.43151	5.07499	7.46102	4.79423	4.10765	12.1822	4.98744	3.45763	0	4.93478	3.31785	8.14005	3.36454	5.69165	3.69776	3.5072
chr17_80653902_80654102	0	3.02357	1.77596	4.13051	7.0869	0.910987	12.6415	7.25739	1.70691	6.45092	3.66661	3.72942	3.69261	7.82182	1.70104	3.94766	1.22828	6.18708	1.08382	1.01652	2.21575	0.845832	4.66314	6.71192	5.13456	2.21494	0.997489	2.59323	2.66097	3.94782	2.48839	2.96002	0.841135	1.62618	5.54664	5.84534
chr17_81006566_81006766	4.53182	8.06285	7.10383	3.30441	0.885862	5.46592	5.83456	2.72152	5.12073	4.6078	5.49991	6.52648	8.6161	2.93318	4.2526	8.88223	4.91311	7.07095	8.67057	3.04957	13.2945	9.30416	0	1.91769	5.13456	2.21494	6.98242	0	2.66097	6.90869	2.48839	4.44003	3.36454	6.50474	6.47108	4.67627
chr18_437066_437266	2.26591	2.01571	2.66393	5.78271	1.77172	5.46592	2.91728	2.72152	2.56036	5.52936	6.41656	2.79706	2.46174	3.91091	3.40208	1.97383	4.91311	3.53548	1.08382	7.11567	2.21575	4.22916	0.932628	7.67077	11.296	2.21494	3.98995	3.45763	1.77398	3.94782	3.31785	1.48001	4.20567	6.50474	1.84888	1.16907
chr18_748004_748232	4.53182	3.02357	8.87978	1.6522	4.42931	5.46592	3.88971	8.16456	3.41382	5.52936	5.49991	6.52648	3.69261	3.91091	3.40208	4.93457	6.14139	3.53548	4.33528	4.0661	3.32363	7.61249	4.66314	4.79423	12.3229	7.75231	0	5.18645	3.54796	2.96087	2.48839	2.22001	4.20567	0.813092	6.47108	8.18347
chr18_1077430_1077630	0	3.02357	14.2077	2.47831	3.54345	1.82197	1.94485	5.44304	4.26727	2.76468	0.916652	2.79706	2.46174	1.95545	2.55156	9.86915	4.91311	1.76774	2.16764	3.04957	3.32363	3.38333	5.59577	1.91769	3.08074	2.21494	0	0.864408	3.54796	6.90869	7.46517	3.70002	0.841135	3.25237	2.77332	1.16907
chr18_2206494_2206694	1.13295	4.03143	4.43989	7.43492	3.54345	3.64395	11.6691	4.53587	4.26727	5.52936	6.41656	4.66177	4.92348	3.91091	3.40208	1.97383	6.14139	2.65161	5.4191	7.11567	3.32363	4.22916	1.86526	5.75308	3.08074	0	0.997489	2.59323	5.32194	1.97391	3.31785	3.70002	1.68227	3.25237	1.84888	0
chr18_3061644_3061962	9.06364	9.07071	2.66393	2.47831	5.31517	10.0209	1.94485	3.62869	3.41382	7.37248	2.74995	5.59413	2.46174	5.86636	6.80416	4.93457	3.68483	8.83869	4.33528	8.1322	4.43151	1.69166	4.66314	5.75308	3.08074	5.53736	16.9573	6.05086	7.09591	3.94782	3.31785	2.96002	2.5234	6.50474	4.6222	5.84534
chr18_3141225_3141425	2.26591	3.02357	1.77596	2.47831	4.42931	2.73296	3.88971	4.53587	2.56036	2.76468	3.66661	4.66177	3.69261	1.95545	2.55156	3.94766	2.45655	6.18708	11.922	6.09915	3.32363	3.38333	3.73051	0	8.2153	3.32242	1.99498	3.45763	1.77398	3.94782	0.829463	5.92004	1.68227	4.87855	2.77332	5.84534
chr18_3157190_3157390	0	5.03928	2.66393	5.78271	2.65759	0.910987	3.88971	4.53587	2.56036	6.45092	1.8333	5.59413	3.69261	2.93318	12.7578	0	2.45655	2.65161	7.58674	3.04957	2.21575	2.5375	2.79788	0.958846	2.05382	4.42989	3.98995	2.59323	4.43495	4.93478	4.14732	4.44003	4.20567	1.62618	5.54664	1.16907
chr18_4510811_4511032	4.53182	4.03143	10.6557	5.78271	6.20104	8.19888	10.6967	10.8861	11.0949	7.37248	3.66661	7.45883	7.38523	3.91091	4.2526	17.7645	8.59794	7.95482	10.8382	15.2479	11.0788	5.07499	5.59577	10.5473	8.2153	8.85978	4.98744	13.8305	7.9829	8.88261	10.783	7.40005	6.72908	8.13092	14.791	7.0144
chr18_4852334_4852551	1.13295	3.02357	2.66393	3.30441	2.65759	3.64395	1.94485	0.907174	1.70691	1.84312	3.66661	5.59413	3.69261	3.91091	1.70104	4.93457	1.22828	4.41934	4.33528	1.01652	2.21575	3.38333	2.79788	4.79423	14.3768	3.32242	3.98995	4.32204	5.32194	0.986956	5.80624	2.96002	4.20567	2.43928	4.6222	1.16907
chr18_5737064_5737294	3.39886	3.02357	4.43989	2.47831	1.77172	3.64395	3.88971	1.81435	2.56036	1.84312	0.916652	2.79706	2.46174	1.95545	1.70104	4.93457	4.91311	1.76774	3.25146	3.04957	5.53938	4.22916	1.86526	6.71192	2.05382	14.3971	1.99498	1.72882	5.32194	1.97391	2.48839	5.18003	1.68227	3.25237	0.92444	7.0144
chr18_9218348_9218548	12.4625	7.055	7.10383	3.30441	3.54345	5.46592	3.88971	3.62869	0.853455	0.92156	0.916652	6.52648	1.23087	3.91091	3.40208	0.986915	6.14139	3.53548	6.50292	2.03305	5.53938	7.61249	1.86526	1.91769	5.13456	2.21494	5.98493	5.18645	7.09591	1.97391	2.48839	4.44003	4.20567	4.87855	1.84888	3.5072
chr18_11576058_11576292	1.13295	9.07071	1.77596	4.95661	7.97276	4.55493	2.91728	5.44304	0	6.45092	2.74995	6.52648	3.69261	5.86636	5.95364	2.96074	4.91311	3.53548	11.922	7.11567	1.10788	2.5375	5.59577	3.83538	3.08074	2.21494	1.99498	2.59323	5.32194	4.93478	2.48839	4.44003	2.5234	1.62618	3.69776	7.0144
chr18_11908205_11908405	9.06364	6.04714	8.87978	5.78271	8.85862	6.37691	5.83456	6.35022	6.82764	4.6078	7.33321	6.52648	3.69261	1.95545	7.65468	3.94766	2.45655	6.18708	5.4191	11.1818	7.75514	5.07499	3.73051	7.67077	4.10765	11.0747	4.98744	4.32204	4.43495	6.90869	6.6357	4.44003	4.20567	9.75711	5.54664	15.1979
chr18_13680667_13680869	14.7284	4.03143	1.77596	2.47831	1.77172	1.82197	3.88971	1.81435	2.56036	2.76468	6.41656	5.59413	3.69261	6.84409	2.55156	2.96074	3.68483	2.65161	3.25146	4.0661	5.53938	3.38333	7.46102	3.83538	4.10765	3.32242	5.98493	6.05086	4.43495	1.97391	3.31785	6.66004	4.20567	5.69165	1.84888	5.84534
chr18_15382026_15382252	7.93068	10.0786	14.2077	6.60881	11.5162	9.10987	13.614	11.7933	5.97418	8.29404	11.9165	10.2559	1.23087	10.755	14.4588	11.843	7.36966	11.4903	8.67057	13.2148	13.2945	2.5375	12.1242	9.58846	11.296	6.64483	13.9648	6.91527	8.86989	8.88261	20.7366	11.1001	12.617	7.31783	8.31996	17.536
chr18_15390242_15390470	18.1273	18.1414	18.6475	17.3481	17.7172	23.6857	23.3382	22.6793	17.9225	14.745	15.5831	12.1206	20.9248	18.5768	22.1135	24.6729	15.9676	17.6774	21.6764	23.3801	27.6969	21.9916	18.6526	22.0535	19.5113	18.827	23.9397	25.9323	25.7227	14.8043	29.8607	17.0201	20.1872	18.7011	24.9599	16.3669
chr18_18885573_18885828	1.13295	4.03143	4.43989	0.826102	7.97276	3.64395	13.614	4.53587	4.26727	5.52936	3.66661	2.79706	4.92348	4.88863	3.40208	4.93457	4.91311	2.65161	0	5.08262	4.43151	4.22916	5.59577	3.83538	7.18839	2.21494	3.98995	0.864408	2.66097	7.89565	2.48839	2.96002	4.20567	4.87855	4.6222	1.16907
chr18_18966733_18966933	4.53182	5.03928	2.66393	4.95661	5.31517	3.64395	2.91728	4.53587	3.41382	5.52936	10.9998	2.79706	4.92348	6.84409	5.95364	4.93457	7.36966	3.53548	7.58674	3.04957	15.5103	2.5375	1.86526	0	4.10765	1.10747	4.98744	5.18645	1.77398	4.93478	3.31785	2.22001	0.841135	3.25237	5.54664	4.67627
chr18_20118594_20118826	4.53182	3.02357	3.55191	5.78271	2.65759	0.910987	1.94485	4.53587	12.8018	1.84312	4.58326	4.66177	4.92348	2.93318	1.70104	6.9084	6.14139	1.76774	1.08382	6.09915	3.32363	4.22916	5.59577	1.91769	1.02691	3.32242	6.98242	3.45763	3.54796	3.94782	6.6357	3.70002	0.841135	1.62618	5.54664	2.33813
chr18_20644319_20644519	4.53182	5.03928	0.887978	4.95661	7.0869	9.10987	1.94485	3.62869	1.70691	3.68624	4.58326	7.45883	0	5.86636	2.55156	3.94766	2.45655	6.18708	4.33528	3.04957	13.2945	3.38333	4.66314	1.91769	4.10765	6.64483	5.98493	9.50849	2.66097	2.96087	1.65893	1.48001	5.88794	4.87855	6.47108	1.16907
chr18_21006248_21006448	2.26591	4.03143	5.32787	4.13051	3.54345	4.55493	10.6967	2.72152	2.56036	5.52936	2.74995	5.59413	6.15435	3.91091	5.10312	7.89532	3.68483	1.76774	1.08382	4.0661	7.75514	0	1.86526	4.79423	3.08074	2.21494	3.98995	5.18645	1.77398	2.96087	5.80624	2.96002	4.20567	0.813092	3.69776	5.84534
chr18_24225628_24225828	3.39886	5.03928	4.43989	4.95661	0.885862	0.910987	0.972427	3.62869	2.56036	4.6078	6.41656	13.9853	2.46174	3.91091	0.85052	0.986915	3.68483	0.883869	6.50292	6.09915	5.53938	4.22916	3.73051	2.87654	5.13456	2.21494	3.98995	6.91527	2.66097	6.90869	2.48839	2.22001	2.5234	2.43928	3.69776	0
chr18_28030046_28030253	1.13295	6.04714	1.77596	0.826102	2.65759	3.64395	6.80699	4.53587	4.26727	5.52936	1.8333	3.72942	3.69261	6.84409	4.2526	3.94766	6.14139	2.65161	14.0897	8.1322	3.32363	3.38333	4.66314	5.75308	8.2153	2.21494	3.98995	3.45763	3.54796	3.94782	6.6357	1.48001	1.68227	5.69165	2.77332	2.33813
chr18_29354030_29354230	1.13295	9.07071	3.55191	4.95661	2.65759	6.37691	2.91728	1.81435	6.82764	1.84312	1.8333	1.86471	0	3.91091	12.7578	8.88223	2.45655	1.76774	2.16764	6.09915	4.43151	0.845832	2.79788	2.87654	6.16147	3.32242	0.997489	5.18645	4.43495	4.93478	5.80624	5.92004	6.72908	4.87855	6.47108	2.33813
chr18_29415843_29416048	14.7284	6.04714	3.55191	3.30441	3.54345	2.73296	6.80699	3.62869	3.41382	7.37248	6.41656	4.66177	7.38523	2.93318	3.40208	3.94766	2.45655	5.30321	2.16764	7.11567	3.32363	4.22916	7.46102	0.958846	3.08074	4.42989	3.98995	4.32204	6.20893	1.97391	4.14732	5.18003	2.5234	0.813092	5.54664	3.5072
chr18_29678340_29678540	2.26591	3.02357	2.66393	6.60881	4.42931	2.73296	5.83456	3.62869	2.56036	4.6078	4.58326	2.79706	6.15435	1.95545	4.2526	4.93457	4.91311	6.18708	3.25146	4.0661	0	4.22916	5.59577	3.83538	6.16147	2.21494	12.9674	2.59323	2.66097	4.93478	1.65893	2.22001	3.36454	1.62618	1.84888	3.5072
chr18_29811205_29811441	4.53182	4.03143	0.887978	0	0	2.73296	5.83456	0	2.56036	4.6078	1.8333	4.66177	1.23087	1.95545	0	1.97383	4.91311	0.883869	2.16764	1.01652	2.21575	1.69166	1.86526	0.958846	3.08074	3.32242	0	1.72882	1.77398	1.97391	4.14732	0.740005	2.5234	0.813092	0.92444	1.16907
chr18_29969754_29969962	5.66477	2.01571	0	1.6522	1.77172	3.64395	3.88971	2.72152	14.5087	1.84312	0.916652	3.72942	3.69261	1.95545	0	2.96074	1.22828	4.41934	3.25146	4.0661	2.21575	3.38333	2.79788	1.91769	4.10765	4.42989	0	3.45763	4.43495	0.986956	3.31785	2.22001	3.36454	0.813092	1.84888	5.84534
chr18_32091093_32091293	5.66477	5.03928	4.43989	4.13051	2.65759	2.73296	4.86213	4.53587	0.853455	4.6078	1.8333	3.72942	2.46174	1.95545	11.9073	2.96074	4.91311	2.65161	4.33528	1.01652	2.21575	1.69166	5.59577	0.958846	5.13456	0	0.997489	3.45763	2.66097	0.986956	2.48839	5.18003	4.20567	4.06546	2.77332	1.16907
chr18_32446197_32446397	1.13295	1.00786	2.66393	4.95661	1.77172	0.910987	3.88971	8.16456	1.70691	1.84312	0.916652	13.053	4.92348	3.91091	3.40208	2.96074	3.68483	5.30321	8.67057	6.09915	2.21575	7.61249	2.79788	4.79423	5.13456	5.53736	2.99247	2.59323	5.32194	2.96087	4.97678	3.70002	5.04681	3.25237	3.69776	3.5072
chr18_37821650_37821872	2.26591	0	1.77596	1.6522	4.42931	4.55493	2.91728	0	5.12073	1.84312	4.58326	6.52648	7.38523	1.95545	2.55156	3.94766	3.68483	6.18708	14.0897	5.08262	0	4.22916	3.73051	3.83538	4.10765	2.21494	0.997489	4.32204	0.886989	5.92174	3.31785	4.44003	1.68227	3.25237	7.39552	1.16907
chr18_42398534_42398734	2.26591	4.03143	7.10383	3.30441	5.31517	2.73296	5.83456	2.72152	4.26727	3.68624	1.8333	4.66177	4.92348	0.977727	3.40208	2.96074	3.68483	5.30321	3.25146	2.03305	13.2945	5.07499	6.5284	2.87654	3.08074	1.10747	1.99498	6.91527	1.77398	4.93478	6.6357	2.22001	5.88794	2.43928	2.77332	3.5072
chr18_42525247_42525447	5.66477	4.03143	13.3197	1.6522	4.42931	2.73296	4.86213	3.62869	1.70691	3.68624	4.58326	5.59413	3.69261	3.91091	3.40208	1.97383	3.68483	6.18708	4.33528	5.08262	3.32363	7.61249	1.86526	4.79423	3.08074	4.42989	1.99498	1.72882	4.43495	2.96087	2.48839	2.96002	4.20567	5.69165	0.92444	2.33813
chr18_42730982_42731182	2.26591	1.00786	4.43989	2.47831	5.31517	0.910987	11.6691	4.53587	1.70691	4.6078	3.66661	4.66177	2.46174	7.82182	0	5.92149	4.91311	1.76774	0	3.04957	0	5.92083	2.79788	2.87654	1.02691	2.21494	0.997489	1.72882	1.77398	2.96087	3.31785	5.92004	3.36454	4.06546	3.69776	3.5072
chr18_43278558_43278800	5.66477	3.02357	0.887978	3.30441	2.65759	1.82197	2.91728	6.35022	1.70691	3.68624	4.58326	8.39119	1.23087	3.91091	3.40208	0.986915	0	2.65161	2.16764	2.03305	2.21575	5.92083	1.86526	1.91769	3.08074	2.21494	0.997489	1.72882	1.77398	6.90869	4.14732	1.48001	5.04681	2.43928	0.92444	9.35254
chr18_44928666_44928866	3.39886	4.03143	0	0.826102	5.31517	3.64395	6.80699	4.53587	1.70691	2.76468	4.58326	1.86471	4.92348	0.977727	2.55156	0.986915	1.22828	2.65161	4.33528	1.01652	1.10788	0.845832	1.86526	0.958846	2.05382	0	0.997489	2.59323	9.75688	4.93478	2.48839	2.22001	5.88794	4.06546	0.92444	4.67627
chr18_46582266_46582466	2.26591	3.02357	8.87978	6.60881	5.31517	1.82197	8.75184	9.07174	5.97418	5.52936	6.41656	7.45883	2.46174	6.84409	4.2526	6.9084	2.45655	5.30321	13.0058	4.0661	4.43151	5.92083	6.5284	2.87654	5.13456	3.32242	4.98744	5.18645	5.32194	3.94782	4.97678	6.66004	3.36454	2.43928	3.69776	7.0144
chr18_47599502_47599702	3.39886	2.01571	3.55191	4.95661	1.77172	2.73296	2.91728	0.907174	3.41382	1.84312	0.916652	0.932354	3.69261	3.91091	0	0	4.91311	5.30321	1.08382	2.03305	5.53938	5.07499	4.66314	0.958846	3.08074	2.21494	12.9674	5.18645	1.77398	4.93478	4.14732	2.96002	3.36454	1.62618	4.6222	7.0144
chr18_47807802_47808170	13.5955	14.11	11.5437	11.5654	7.97276	10.0209	8.75184	8.16456	9.388	8.29404	9.16652	6.52648	22.1557	13.6882	9.35572	7.89532	11.0545	5.30321	13.0058	8.1322	8.86302	8.45832	15.8547	10.5473	7.18839	3.32242	8.9774	5.18645	6.20893	8.88261	9.95356	11.1001	7.57021	11.3833	6.47108	3.5072
chr18_53400019_53400245	3.39886	9.07071	0.887978	2.47831	2.65759	2.73296	3.88971	1.81435	5.97418	9.2156	3.66661	15.85	2.46174	4.88863	2.55156	4.93457	8.59794	7.07095	5.4191	8.1322	5.53938	1.69166	4.66314	1.91769	6.16147	5.53736	0.997489	5.18645	1.77398	4.93478	5.80624	3.70002	5.04681	2.43928	0.92444	2.33813
chr18_53950047_53950265	5.66477	4.03143	2.66393	2.47831	3.54345	8.19888	3.88971	7.25739	5.12073	0.92156	3.66661	2.79706	2.46174	0.977727	3.40208	2.96074	3.68483	0	1.08382	0	3.32363	2.5375	4.66314	2.87654	4.10765	3.32242	9.97489	5.18645	3.54796	2.96087	4.14732	4.44003	1.68227	1.62618	2.77332	4.67627
chr18_56338568_56338821	5.66477	9.07071	8.87978	8.26102	10.6303	5.46592	6.80699	4.53587	11.9484	6.45092	7.33321	7.45883	7.38523	4.88863	5.95364	8.88223	12.2828	6.18708	17.3411	11.1818	4.43151	10.15	8.39365	4.79423	5.13456	12.1822	4.98744	6.05086	4.43495	9.86956	10.783	6.66004	2.5234	5.69165	2.77332	9.35254
chr18_57028418_57028654	2.26591	3.02357	5.32787	2.47831	4.42931	5.46592	1.94485	6.35022	5.97418	4.6078	2.74995	2.79706	8.6161	5.86636	0	1.97383	3.68483	6.18708	3.25146	6.09915	12.1866	5.07499	3.73051	0.958846	4.10765	1.10747	2.99247	2.59323	3.54796	3.94782	8.29463	5.92004	13.4582	2.43928	5.54664	5.84534
chr18_58545872_58546073	2.26591	1.00786	1.77596	1.6522	4.42931	3.64395	0.972427	2.72152	1.70691	3.68624	4.58326	1.86471	3.69261	2.93318	1.70104	5.92149	3.68483	7.07095	0	5.08262	2.21575	2.5375	3.73051	1.91769	3.08074	4.42989	2.99247	0.864408	1.77398	3.94782	3.31785	2.96002	1.68227	1.62618	4.6222	15.1979
chr18_60079929_60080225	2.26591	6.04714	3.55191	4.95661	6.20104	3.64395	6.80699	1.81435	5.97418	2.76468	2.74995	1.86471	2.46174	5.86636	16.1599	2.96074	7.36966	11.4903	1.08382	4.0661	2.21575	1.69166	2.79788	0	2.05382	4.42989	1.99498	4.32204	5.32194	6.90869	6.6357	5.18003	1.68227	9.75711	2.77332	4.67627
chr18_61611972_61612172	2.26591	4.03143	1.77596	2.47831	6.20104	2.73296	2.91728	0.907174	3.41382	2.76468	1.8333	1.86471	14.7705	1.95545	2.55156	0.986915	1.22828	2.65161	4.33528	1.01652	5.53938	4.22916	3.73051	1.91769	2.05382	1.10747	1.99498	1.72882	1.77398	1.97391	2.48839	4.44003	3.36454	2.43928	5.54664	3.5072
chr18_61827660_61827860	2.26591	6.04714	2.66393	5.78271	3.54345	3.64395	2.91728	6.35022	0.853455	3.68624	0.916652	2.79706	2.46174	9.77727	2.55156	3.94766	2.45655	2.65161	15.1735	4.0661	1.10788	3.38333	3.73051	3.83538	3.08074	6.64483	1.99498	6.05086	2.66097	4.93478	4.14732	2.22001	2.5234	5.69165	3.69776	2.33813
chr18_66780673_66780873	5.66477	2.01571	6.21585	3.30441	1.77172	3.64395	5.83456	0.907174	3.41382	3.68624	1.8333	8.39119	1.23087	2.93318	4.2526	16.7776	1.22828	2.65161	4.33528	6.09915	6.64726	5.07499	6.5284	3.83538	4.10765	7.75231	4.98744	1.72882	5.32194	3.94782	4.97678	1.48001	2.5234	6.50474	5.54664	5.84534
chr18_67048963_67049169	2.26591	0	0.887978	4.95661	5.31517	2.73296	2.91728	4.53587	3.41382	0.92156	3.66661	2.79706	4.92348	0	3.40208	2.96074	1.22828	1.76774	3.25146	8.1322	14.4024	2.5375	4.66314	0.958846	2.05382	4.42989	0	4.32204	1.77398	5.92174	2.48839	2.96002	4.20567	6.50474	1.84888	4.67627
chr18_67731589_67731789	4.53182	3.02357	6.21585	1.6522	3.54345	4.55493	5.83456	0.907174	5.12073	5.52936	1.8333	5.59413	3.69261	3.91091	5.10312	1.97383	3.68483	2.65161	2.16764	3.04957	4.43151	4.22916	2.79788	3.83538	11.296	0	3.98995	5.18645	5.32194	2.96087	3.31785	5.18003	1.68227	2.43928	3.69776	4.67627
chr18_67825624_67825855	1.13295	3.02357	5.32787	2.47831	2.65759	5.46592	2.91728	2.72152	0	6.45092	3.66661	4.66177	3.69261	4.88863	2.55156	1.97383	4.91311	7.07095	7.58674	4.0661	14.4024	3.38333	1.86526	1.91769	2.05382	4.42989	2.99247	4.32204	1.77398	4.93478	5.80624	5.18003	3.36454	4.06546	12.0177	2.33813
chr18_67892152_67892352	5.66477	5.03928	12.4317	0.826102	6.20104	3.64395	3.88971	2.72152	1.70691	3.68624	3.66661	2.79706	4.92348	2.93318	3.40208	5.92149	4.91311	0.883869	4.33528	3.04957	1.10788	1.69166	7.46102	4.79423	5.13456	4.42989	1.99498	3.45763	4.43495	0.986956	4.14732	3.70002	4.20567	5.69165	4.6222	2.33813
chr18_68253555_68253819	3.39886	4.03143	4.43989	5.78271	5.31517	4.55493	8.75184	3.62869	2.56036	2.76468	6.41656	3.72942	6.15435	4.88863	5.10312	7.89532	6.14139	2.65161	2.16764	3.04957	15.5103	5.92083	2.79788	5.75308	7.18839	1.10747	2.99247	10.3729	7.09591	3.94782	3.31785	3.70002	3.36454	4.87855	3.69776	3.5072
chr18_71757423_71757623	14.7284	3.02357	6.21585	3.30441	6.20104	5.46592	3.88971	3.62869	3.41382	2.76468	6.41656	0.932354	3.69261	6.84409	1.70104	2.96074	3.68483	2.65161	2.16764	2.03305	1.10788	3.38333	3.73051	3.83538	3.08074	2.21494	5.98493	2.59323	0.886989	0.986956	3.31785	3.70002	5.04681	4.87855	5.54664	2.33813
chr18_71806463_71806734	3.39886	5.03928	4.43989	2.47831	7.0869	6.37691	5.83456	3.62869	3.41382	4.6078	2.74995	6.52648	3.69261	5.86636	6.80416	1.97383	6.14139	7.07095	16.2573	4.0661	5.53938	2.5375	7.46102	3.83538	1.02691	1.10747	5.98493	4.32204	6.20893	3.94782	1.65893	6.66004	7.57021	4.06546	3.69776	5.84534
chr18_72928337_72928573	2.26591	5.03928	2.66393	3.30441	6.20104	7.28789	2.91728	4.53587	3.41382	7.37248	5.49991	1.86471	4.92348	1.95545	4.2526	8.88223	8.59794	0.883869	3.25146	6.09915	16.6182	7.61249	0.932628	8.62962	6.16147	3.32242	4.98744	6.05086	1.77398	3.94782	3.31785	4.44003	5.04681	3.25237	2.77332	2.33813
chr18_73184224_73184469	16.9943	4.03143	4.43989	2.47831	2.65759	7.28789	7.77942	6.35022	4.26727	4.6078	4.58326	4.66177	4.92348	2.93318	5.95364	3.94766	2.45655	2.65161	6.50292	1.01652	4.43151	4.22916	5.59577	5.75308	2.05382	2.21494	1.99498	3.45763	2.66097	5.92174	4.97678	2.22001	3.36454	5.69165	2.77332	2.33813
chr18_73192012_73192226	4.53182	5.03928	13.3197	0.826102	3.54345	1.82197	1.94485	1.81435	2.56036	5.52936	2.74995	3.72942	1.23087	3.91091	5.10312	6.9084	0	5.30321	6.50292	1.01652	2.21575	6.76666	2.79788	4.79423	5.13456	5.53736	1.99498	3.45763	1.77398	5.92174	4.14732	3.70002	4.20567	5.69165	3.69776	3.5072
chr18_76599179_76599379	1.13295	0	0.887978	0	1.77172	0	0.972427	3.62869	1.70691	1.84312	3.66661	0	2.46174	0	2.55156	2.96074	1.22828	0.883869	3.25146	1.01652	0	0.845832	0.932628	1.91769	0	1.10747	0.997489	0.864408	1.77398	1.97391	0.829463	1.48001	1.68227	1.62618	0.92444	0
chr18_77254461_77254696	1.13295	0	0.887978	0.826102	0.885862	0.910987	0.972427	0.907174	3.41382	2.76468	1.8333	2.79706	1.23087	0.977727	0.85052	0.986915	0	0	0	0	0	0	0	0	1.02691	0	0	1.72882	0.886989	0	1.65893	1.48001	2.5234	0	0.92444	1.16907
chr18_77709873_77710092	6.79773	3.02357	6.21585	2.47831	6.20104	3.64395	6.80699	2.72152	6.82764	3.68624	3.66661	4.66177	4.92348	5.86636	5.95364	4.93457	8.59794	1.76774	17.3411	4.0661	5.53938	6.76666	10.2589	7.67077	5.13456	2.21494	2.99247	1.72882	9.75688	5.92174	9.12409	5.92004	2.5234	5.69165	4.6222	5.84534
chr18_77831523_77831756	2.26591	6.04714	7.10383	9.91322	6.20104	1.82197	3.88971	8.16456	5.12073	5.52936	5.49991	8.39119	6.15435	8.79954	2.55156	5.92149	8.59794	7.07095	7.58674	3.04957	6.64726	4.22916	6.5284	8.62962	5.13456	6.64483	3.98995	6.05086	7.9829	7.89565	7.46517	10.3601	8.41135	8.94402	6.47108	5.84534
chr18_77970266_77970486	1.13295	5.03928	3.55191	0	4.42931	17.3087	12.6415	9.07174	3.41382	2.76468	2.74995	10.2559	2.46174	1.95545	1.70104	1.97383	6.14139	3.53548	7.58674	4.0661	5.53938	1.69166	9.32628	0.958846	5.13456	4.42989	4.98744	6.91527	3.54796	2.96087	3.31785	3.70002	2.5234	3.25237	4.6222	3.5072
chr19_381374_381574	3.39886	1.00786	2.66393	1.6522	2.65759	3.64395	0.972427	2.72152	0	1.84312	5.49991	2.79706	0	3.91091	3.40208	4.93457	4.91311	2.65161	1.08382	1.01652	4.43151	1.69166	0.932628	0.958846	2.05382	3.32242	1.99498	1.72882	0.886989	1.97391	2.48839	0.740005	2.5234	2.43928	2.77332	3.5072
chr19_434227_434442	6.79773	10.0786	10.6557	11.5654	12.4021	10.0209	9.72427	16.3291	13.6553	7.37248	8.24986	12.1206	13.5396	9.77727	6.80416	13.8168	18.4242	9.72256	6.50292	8.1322	6.64726	11.8417	2.79788	13.4238	9.24221	13.2897	6.98242	9.50849	13.3048	10.8565	9.95356	11.1001	11.7759	11.3833	9.2444	5.84534
chr19_452227_452437	1.13295	1.00786	0.887978	0.826102	0.885862	0.910987	3.88971	0	2.56036	0	0.916652	1.86471	0	0.977727	0.85052	0.986915	0	2.65161	1.08382	3.04957	2.21575	1.69166	0.932628	1.91769	3.08074	2.21494	0	0.864408	0.886989	1.97391	0.829463	0	0.841135	0.813092	0.92444	2.33813
chr19_628078_628278	4.53182	6.04714	6.21585	4.13051	5.31517	4.55493	2.91728	10.8861	5.97418	5.52936	6.41656	15.85	6.15435	2.93318	9.35572	4.93457	4.91311	6.18708	6.50292	5.08262	3.32363	4.22916	4.66314	3.83538	0	5.53736	6.98242	5.18645	4.43495	1.97391	7.46517	5.92004	5.04681	4.06546	7.39552	3.5072
chr19_796717_796934	5.66477	9.07071	4.43989	6.60881	7.0869	10.0209	11.6691	9.07174	10.2415	6.45092	6.41656	10.2559	12.3087	8.79954	5.10312	1.97383	6.14139	10.6064	5.4191	7.11567	5.53938	9.30416	8.39365	16.3004	7.18839	8.85978	7.97991	6.91527	7.9829	4.93478	4.14732	7.40005	4.20567	8.13092	3.69776	17.536
chr19_835339_835547	16.9943	13.1021	15.0956	9.91322	11.5162	11.8428	7.77942	14.5148	15.3622	14.745	8.24986	10.2559	6.15435	17.5991	10.2062	10.8561	8.59794	11.4903	8.67057	8.1322	11.0788	14.3791	11.1915	18.2181	7.18839	7.75231	10.9724	10.3729	11.5309	9.86956	12.4419	13.3201	13.4582	17.0749	14.791	15.1979
chr19_909081_909294	7.93068	8.06285	7.10383	5.78271	4.42931	3.64395	8.75184	6.35022	14.5087	7.37248	7.33321	10.2559	9.84697	5.86636	2.55156	2.96074	3.68483	5.30321	2.16764	6.09915	5.53938	4.22916	7.46102	5.75308	4.10765	4.42989	7.97991	5.18645	4.43495	10.8565	9.12409	8.88006	6.72908	6.50474	5.54664	5.84534
chr19_1087818_1088018	1.13295	8.06285	7.10383	7.43492	4.42931	7.28789	6.80699	5.44304	5.97418	3.68624	3.66661	11.1883	8.6161	3.91091	8.5052	6.9084	4.91311	5.30321	9.75439	5.08262	7.75514	7.61249	8.39365	18.2181	8.2153	11.0747	7.97991	6.91527	3.54796	12.8304	3.31785	8.88006	6.72908	5.69165	8.31996	2.33813
chr19_1361090_1361290	6.79773	6.04714	4.43989	4.13051	5.31517	16.3978	4.86213	9.07174	8.53455	8.29404	5.49991	6.52648	3.69261	6.84409	1.70104	9.86915	9.82622	7.95482	4.33528	7.11567	8.86302	4.22916	4.66314	5.75308	5.13456	4.42989	5.98493	9.50849	5.32194	5.92174	4.97678	9.62006	8.41135	6.50474	10.1688	14.0288
chr19_1775278_1775532	2.26591	6.04714	5.32787	4.95661	5.31517	9.10987	4.86213	10.8861	5.12073	7.37248	7.33321	9.32354	3.69261	9.77727	8.5052	5.92149	6.14139	5.30321	15.1735	6.09915	11.0788	6.76666	6.5284	6.71192	10.2691	7.75231	5.98493	7.77968	7.9829	11.8435	6.6357	2.96002	7.57021	8.94402	2.77332	9.35254
chr19_1837293_1837516	4.53182	4.03143	5.32787	5.78271	2.65759	7.28789	1.94485	7.25739	5.97418	4.6078	5.49991	5.59413	6.15435	10.755	4.2526	2.96074	3.68483	4.41934	9.75439	6.09915	4.43151	2.5375	2.79788	8.62962	18.4844	8.85978	3.98995	2.59323	3.54796	1.97391	4.14732	2.96002	6.72908	4.06546	4.6222	8.18347
chr19_1941034_1941244	5.66477	12.0943	14.2077	7.43492	14.1738	4.55493	2.91728	10.8861	8.53455	7.37248	8.24986	7.45883	16.0013	8.79954	12.7578	5.92149	12.2828	13.258	6.50292	10.1652	11.0788	11.8417	9.32628	8.62962	9.24221	7.75231	9.97489	8.64408	8.86989	7.89565	6.6357	5.92004	11.7759	9.75711	12.9422	9.35254
chr19_2009799_2010006	14.7284	7.055	7.10383	4.13051	7.0869	3.64395	4.86213	8.16456	4.26727	5.52936	1.8333	2.79706	4.92348	3.91091	6.80416	4.93457	14.7393	5.30321	9.75439	2.03305	5.53938	5.92083	3.73051	6.71192	6.16147	2.21494	6.98242	4.32204	5.32194	6.90869	5.80624	6.66004	5.88794	8.13092	3.69776	4.67627
chr19_2030707_2030907	3.39886	6.04714	3.55191	4.13051	5.31517	4.55493	0	7.25739	1.70691	4.6078	7.33321	16.7824	3.69261	6.84409	3.40208	3.94766	0	4.41934	3.25146	2.03305	9.97089	5.92083	5.59577	7.67077	1.02691	4.42989	4.98744	1.72882	3.54796	5.92174	4.97678	6.66004	7.57021	8.13092	4.6222	3.5072
chr19_2051281_2051482	7.93068	16.1257	7.10383	9.91322	14.1738	10.0209	13.614	5.44304	15.3622	6.45092	11.9165	8.39119	2.46174	6.84409	9.35572	8.88223	11.0545	9.72256	7.58674	12.1983	12.1866	9.30416	9.32628	11.5062	7.18839	9.96725	6.98242	12.9661	7.09591	4.93478	10.783	5.92004	7.57021	8.94402	10.1688	8.18347
chr19_2081905_2082105	10.1966	10.0786	7.9918	9.08712	8.85862	6.37691	3.88971	4.53587	14.5087	2.76468	1.8333	6.52648	8.6161	3.91091	5.10312	10.8561	6.14139	13.258	4.33528	6.09915	5.53938	6.76666	6.5284	3.83538	4.10765	4.42989	3.98995	6.91527	7.9829	3.94782	10.783	3.70002	5.88794	8.94402	5.54664	5.84534
chr19_2206288_2206488	5.66477	10.0786	6.21585	3.30441	4.42931	4.55493	2.91728	0.907174	5.97418	6.45092	2.74995	13.9853	3.69261	2.93318	6.80416	1.97383	6.14139	5.30321	10.8382	7.11567	6.64726	4.22916	4.66314	2.87654	3.08074	4.42989	4.98744	5.18645	9.75688	3.94782	5.80624	3.70002	5.88794	8.94402	3.69776	5.84534
chr19_2294104_2294304	3.39886	8.06285	6.21585	4.13051	8.85862	5.46592	3.88971	2.72152	5.12073	2.76468	8.24986	3.72942	3.69261	6.84409	6.80416	5.92149	3.68483	6.18708	14.0897	6.09915	5.53938	4.22916	7.46102	6.71192	7.18839	6.64483	1.99498	4.32204	3.54796	4.93478	4.14732	10.3601	4.20567	8.94402	3.69776	3.5072
chr19_2610112_2610312	5.66477	7.055	2.66393	4.95661	2.65759	8.19888	4.86213	6.35022	7.68109	4.6078	6.41656	5.59413	7.38523	8.79954	5.95364	2.96074	7.36966	7.95482	3.25146	3.04957	6.64726	5.92083	2.79788	10.5473	5.13456	8.85978	6.98242	6.05086	8.86989	11.8435	2.48839	9.62006	2.5234	8.94402	4.6222	15.1979
chr19_2679505_2679705	5.66477	7.055	3.55191	4.95661	5.31517	10.0209	3.88971	6.35022	4.26727	5.52936	7.33321	6.52648	7.38523	6.84409	15.3094	2.96074	11.0545	5.30321	2.16764	12.1983	5.53938	4.22916	10.2589	8.62962	5.13456	2.21494	6.98242	6.91527	6.20893	4.93478	6.6357	5.18003	5.04681	10.5702	4.6222	4.67627
chr19_2833856_2834056	3.39886	6.04714	7.9918	4.13051	3.54345	3.64395	7.77942	2.72152	4.26727	3.68624	9.16652	4.66177	0	6.84409	3.40208	5.92149	8.59794	3.53548	1.08382	9.14872	3.32363	5.07499	4.66314	6.71192	6.16147	9.96725	14.9623	4.32204	6.20893	5.92174	9.12409	6.66004	5.88794	4.87855	2.77332	0
chr19_2887350_2887550	13.5955	7.055	1.77596	6.60881	7.97276	4.55493	6.80699	9.07174	6.82764	6.45092	10.0832	13.053	7.38523	1.95545	3.40208	6.9084	4.91311	4.41934	8.67057	3.04957	6.64726	3.38333	7.46102	6.71192	5.13456	5.53736	9.97489	2.59323	4.43495	9.86956	4.14732	11.8401	9.25248	4.06546	6.47108	5.84534
chr19_2927164_2927365	3.39886	3.02357	6.21585	3.30441	3.54345	3.64395	6.80699	2.72152	6.82764	8.29404	5.49991	4.66177	6.15435	5.86636	5.10312	3.94766	4.91311	7.07095	6.50292	6.09915	5.53938	6.76666	4.66314	4.79423	4.10765	7.75231	3.98995	5.18645	1.77398	16.7783	4.97678	5.18003	3.36454	6.50474	7.39552	7.0144
chr19_3035633_3035893	10.1966	9.07071	8.87978	15.6959	6.20104	10.0209	7.77942	9.07174	13.6553	5.52936	10.9998	6.52648	6.15435	12.7104	7.65468	8.88223	7.36966	3.53548	18.425	15.2479	6.64726	13.5333	7.46102	7.67077	6.16147	6.64483	8.9774	5.18645	3.54796	12.8304	5.80624	7.40005	9.25248	6.50474	4.6222	9.35254
chr19_3235532_3235855	4.53182	7.055	3.55191	4.13051	8.85862	10.0209	5.83456	7.25739	6.82764	21.1959	7.33321	8.39119	8.6161	6.84409	8.5052	9.86915	4.91311	12.3742	15.1735	4.0661	8.86302	5.92083	9.32628	7.67077	6.16147	6.64483	4.98744	8.64408	13.3048	8.88261	2.48839	8.88006	7.57021	5.69165	4.6222	9.35254
chr19_3317029_3317259	14.7284	7.055	3.55191	5.78271	4.42931	3.64395	4.86213	6.35022	2.56036	4.6078	9.16652	5.59413	3.69261	3.91091	4.2526	5.92149	8.59794	2.65161	4.33528	8.1322	7.75514	4.22916	4.66314	5.75308	5.13456	15.5046	9.97489	4.32204	4.43495	4.93478	2.48839	6.66004	8.41135	1.62618	4.6222	3.5072
chr19_3506061_3506284	12.4625	10.0786	13.3197	13.2176	13.2879	19.1307	11.6691	12.7004	7.68109	9.2156	9.16652	10.2559	16.0013	6.84409	8.5052	10.8561	13.511	8.83869	6.50292	5.08262	12.1866	10.9958	9.32628	10.5473	11.296	7.75231	4.98744	13.8305	7.9829	8.88261	11.6125	13.3201	20.1872	15.4488	12.9422	9.35254
chr19_3572809_3573009	15.8614	15.1179	9.76776	17.3481	11.5162	7.28789	11.6691	5.44304	21.3364	10.1372	14.6664	11.1883	12.3087	8.79954	9.35572	4.93457	9.82622	5.30321	7.58674	12.1983	3.32363	5.07499	7.46102	5.75308	11.296	5.53736	12.9674	13.8305	10.6439	6.90869	9.12409	11.1001	8.41135	11.3833	6.47108	12.8597
chr19_3649520_3649806	0	0	0	0.826102	1.77172	0	0	0	0	0	0	1.86471	1.23087	0	0	0	0	0	0	1.01652	0	0.845832	0	1.91769	0	0	0.997489	0	0	0	0	0.740005	0	0	0.92444	1.16907
chr19_3855307_3855507	11.3295	7.055	5.32787	2.47831	9.74449	13.6648	5.83456	5.44304	8.53455	4.6078	3.66661	3.72942	2.46174	8.79954	10.2062	3.94766	6.14139	3.53548	5.4191	5.08262	5.53938	7.61249	4.66314	5.75308	5.13456	6.64483	14.9623	7.77968	6.20893	5.92174	7.46517	6.66004	5.88794	3.25237	1.84888	5.84534
chr19_4067145_4067345	9.06364	8.06285	10.6557	3.30441	10.6303	3.64395	3.88971	9.07174	4.26727	3.68624	10.0832	4.66177	8.6161	7.82182	14.4588	4.93457	14.7393	7.95482	4.33528	4.0661	3.32363	11.8417	13.0568	14.3827	7.18839	8.85978	10.9724	4.32204	5.32194	7.89565	10.783	5.92004	7.57021	7.31783	7.39552	10.5216
chr19_4369418_4369618	7.93068	2.01571	4.43989	3.30441	7.0869	5.46592	3.88971	9.07174	5.12073	11.9803	7.33321	13.9853	3.69261	6.84409	11.9073	3.94766	8.59794	3.53548	6.50292	6.09915	6.64726	7.61249	6.5284	5.75308	10.2691	4.42989	6.98242	4.32204	7.09591	4.93478	6.6357	5.92004	9.25248	2.43928	7.39552	9.35254
chr19_4981912_4982112	7.93068	2.01571	6.21585	7.43492	9.74449	4.55493	4.86213	1.81435	1.70691	5.52936	4.58326	6.52648	3.69261	6.84409	13.6083	9.86915	1.22828	1.76774	9.75439	6.09915	7.75514	8.45832	1.86526	8.62962	4.10765	6.64483	1.99498	4.32204	6.20893	3.94782	4.97678	8.14005	3.36454	5.69165	5.54664	7.0144
chr19_5086896_5087105	4.53182	2.01571	11.5437	7.43492	7.97276	3.64395	2.91728	10.8861	5.12073	7.37248	5.49991	14.9177	4.92348	2.93318	3.40208	7.89532	4.91311	5.30321	5.4191	10.1652	9.97089	2.5375	5.59577	2.87654	4.10765	2.21494	4.98744	6.05086	4.43495	3.94782	2.48839	9.62006	5.88794	4.87855	6.47108	4.67627
chr19_5128291_5128506	2.26591	5.03928	13.3197	5.78271	9.74449	3.64395	4.86213	9.07174	4.26727	1.84312	2.74995	5.59413	1.23087	2.93318	5.10312	7.89532	3.68483	7.95482	4.33528	7.11567	7.75514	6.76666	1.86526	8.62962	11.296	5.53736	2.99247	9.50849	2.66097	4.93478	5.80624	8.14005	5.88794	4.87855	4.6222	4.67627
chr19_5905422_5905624	3.39886	5.03928	2.66393	6.60881	2.65759	7.28789	9.72427	7.25739	5.12073	7.37248	5.49991	2.79706	1.23087	5.86636	3.40208	5.92149	6.14139	5.30321	4.33528	4.0661	3.32363	2.5375	9.32628	2.87654	3.08074	1.10747	5.98493	5.18645	7.09591	16.7783	10.783	2.22001	3.36454	4.06546	6.47108	3.5072
chr19_6667679_6667879	3.39886	4.03143	6.21585	4.95661	2.65759	4.55493	6.80699	8.16456	5.12073	7.37248	3.66661	0	3.69261	7.82182	10.2062	3.94766	8.59794	6.18708	15.1735	5.08262	3.32363	3.38333	3.73051	6.71192	9.24221	6.64483	2.99247	6.05086	7.09591	5.92174	9.95356	7.40005	5.04681	4.06546	3.69776	10.5216
chr19_6737619_6737864	10.1966	7.055	4.43989	14.0437	13.2879	12.7538	14.5864	13.6076	9.388	10.1372	10.9998	14.9177	8.6161	10.755	12.7578	8.88223	13.511	7.95482	9.75439	9.14872	18.8339	7.61249	13.0568	8.62962	10.2691	7.75231	8.9774	6.91527	12.4179	13.8174	14.9303	9.62006	8.41135	8.13092	14.791	9.35254
chr19_7129253_7129506	3.39886	7.055	8.87978	4.95661	8.85862	4.55493	10.6967	6.35022	6.82764	9.2156	4.58326	7.45883	2.46174	7.82182	17.0104	2.96074	9.82622	6.18708	3.25146	4.0661	6.64726	3.38333	5.59577	2.87654	5.13456	5.53736	6.98242	6.91527	9.75688	3.94782	6.6357	4.44003	5.04681	7.31783	5.54664	4.67627
chr19_7177192_7177403	4.53182	6.04714	2.66393	1.6522	7.0869	5.46592	2.91728	4.53587	9.388	6.45092	5.49991	6.52648	6.15435	3.91091	6.80416	4.93457	4.91311	5.30321	11.922	7.11567	4.43151	7.61249	5.59577	3.83538	6.16147	11.0747	5.98493	5.18645	8.86989	7.89565	4.14732	7.40005	5.04681	1.62618	9.2444	16.3669
chr19_7515377_7515582	31.7227	46.3614	37.2951	32.218	30.1193	30.0626	27.228	32.6583	27.3105	41.4702	40.3327	27.9706	33.2335	33.2427	20.4125	30.5944	29.4786	29.1677	32.5146	24.3966	24.3733	25.375	17.7199	25.8888	41.0765	18.827	32.9171	31.9831	29.2706	27.6348	26.5428	24.4202	33.6454	38.2153	37.9021	38.5792
chr19_7545029_7545229	6.79773	8.06285	2.66393	6.60881	7.0869	10.9318	0.972427	6.35022	5.97418	7.37248	3.66661	7.45883	3.69261	5.86636	14.4588	5.92149	1.22828	4.41934	2.16764	7.11567	3.32363	4.22916	5.59577	5.75308	8.2153	5.53736	6.98242	4.32204	7.09591	7.89565	6.6357	2.96002	6.72908	6.50474	6.47108	1.16907
chr19_8108569_8108869	6.79773	10.0786	6.21585	11.5654	9.74449	7.28789	20.421	9.97891	6.82764	9.2156	8.24986	4.66177	4.92348	4.88863	8.5052	6.9084	6.14139	6.18708	2.16764	10.1652	6.64726	5.07499	5.59577	9.58846	5.13456	5.53736	6.98242	6.05086	5.32194	13.8174	9.12409	7.40005	5.04681	8.13092	1.84888	4.67627
chr19_8261020_8261254	5.66477	5.03928	3.55191	7.43492	9.74449	7.28789	6.80699	11.7933	3.41382	7.37248	8.24986	8.39119	9.84697	5.86636	5.95364	5.92149	7.36966	7.07095	6.50292	8.1322	13.2945	6.76666	4.66314	4.79423	9.24221	6.64483	4.98744	7.77968	7.09591	17.7652	8.29463	8.14005	5.04681	7.31783	11.0933	7.0144
chr19_9731428_9731638	2.26591	8.06285	5.32787	4.95661	2.65759	10.0209	1.94485	7.25739	7.68109	6.45092	2.74995	6.52648	7.38523	8.79954	5.95364	2.96074	6.14139	2.65161	4.33528	6.09915	7.75514	4.22916	5.59577	9.58846	8.2153	3.32242	6.98242	1.72882	6.20893	15.7913	6.6357	4.44003	3.36454	9.75711	3.69776	8.18347
chr19_9844089_9844289	6.79773	7.055	1.77596	4.13051	4.42931	2.73296	15.5588	6.35022	5.97418	7.37248	6.41656	0	8.6161	4.88863	4.2526	3.94766	0	2.65161	9.75439	6.09915	2.21575	4.22916	2.79788	9.58846	2.05382	8.85978	10.9724	3.45763	2.66097	3.94782	1.65893	2.96002	6.72908	6.50474	3.69776	3.5072
chr19_9856754_9856954	0	4.03143	5.32787	0.826102	5.31517	3.64395	13.614	5.44304	6.82764	5.52936	2.74995	8.39119	7.38523	6.84409	5.95364	3.94766	4.91311	8.83869	6.50292	5.08262	7.75514	7.61249	3.73051	1.91769	1.02691	2.21494	2.99247	5.18645	7.9829	4.93478	4.14732	5.18003	5.88794	4.06546	9.2444	8.18347
chr19_10671119_10671319	4.53182	6.04714	1.77596	4.95661	7.0869	7.28789	1.94485	9.97891	13.6553	6.45092	3.66661	0.932354	4.92348	6.84409	6.80416	3.94766	7.36966	2.65161	4.33528	4.0661	3.32363	3.38333	9.32628	4.79423	7.18839	6.64483	4.98744	5.18645	8.86989	6.90869	7.46517	5.92004	6.72908	7.31783	4.6222	11.6907
chr19_10712766_10713074	7.93068	4.03143	12.4317	14.0437	6.20104	6.37691	6.80699	4.53587	5.97418	8.29404	5.49991	13.9853	20.9248	12.7104	6.80416	5.92149	3.68483	14.1419	13.0058	16.2644	13.2945	15.225	6.5284	7.67077	12.3229	5.53736	5.98493	10.3729	7.9829	6.90869	5.80624	8.88006	12.617	13.8226	11.0933	10.5216
chr19_10806400_10806641	7.93068	10.0786	12.4317	10.7393	9.74449	18.2197	4.86213	7.25739	12.8018	2.76468	9.16652	7.45883	11.0778	7.82182	9.35572	6.9084	14.7393	6.18708	4.33528	13.2148	7.75514	9.30416	4.66314	8.62962	8.2153	5.53736	11.9699	6.91527	7.9829	5.92174	5.80624	3.70002	7.57021	2.43928	11.0933	9.35254
chr19_10947893_10948093	7.93068	6.04714	4.43989	4.95661	6.20104	2.73296	6.80699	1.81435	6.82764	9.2156	2.74995	4.66177	1.23087	11.7327	4.2526	2.96074	8.59794	5.30321	8.67057	5.08262	17.726	4.22916	5.59577	3.83538	4.10765	7.75231	4.98744	9.50849	7.9829	2.96087	4.14732	5.92004	4.20567	7.31783	7.39552	5.84534
chr19_11423794_11424024	2.26591	5.03928	6.21585	5.78271	6.20104	7.28789	4.86213	3.62869	6.82764	5.52936	12.8331	4.66177	2.46174	8.79954	2.55156	11.843	7.36966	3.53548	4.33528	7.11567	3.32363	6.76666	7.46102	8.62962	4.10765	17.7196	5.98493	6.05086	5.32194	4.93478	5.80624	2.22001	7.57021	11.3833	1.84888	5.84534
chr19_11456968_11457281	1.13295	15.1179	9.76776	14.0437	13.2879	10.9318	22.3658	9.07174	11.9484	11.0587	13.7498	15.85	11.0778	8.79954	9.35572	9.86915	7.36966	13.258	15.1735	10.1652	6.64726	6.76666	13.0568	14.3827	11.296	4.42989	7.97991	8.64408	6.20893	7.89565	12.4419	7.40005	14.2993	10.5702	12.0177	14.0288
chr19_11563069_11563367	5.66477	6.04714	7.9918	4.13051	11.5162	10.9318	2.91728	8.16456	5.12073	6.45092	7.33321	9.32354	4.92348	1.95545	8.5052	5.92149	9.82622	7.07095	5.4191	11.1818	3.32363	4.22916	8.39365	6.71192	21.5652	3.32242	7.97991	8.64408	7.9829	6.90869	11.6125	5.92004	11.7759	7.31783	8.31996	7.0144
chr19_11810950_11811150	3.39886	6.04714	7.9918	6.60881	3.54345	3.64395	6.80699	8.16456	5.12073	8.29404	8.24986	10.2559	2.46174	5.86636	5.10312	6.9084	6.14139	7.95482	6.50292	7.11567	5.53938	5.92083	5.59577	7.67077	14.3768	4.42989	4.98744	3.45763	4.43495	2.96087	5.80624	6.66004	7.57021	4.06546	4.6222	0
chr19_11908632_11908839	11.3295	2.01571	5.32787	4.13051	5.31517	10.0209	3.88971	5.44304	5.12073	5.52936	8.24986	10.2559	4.92348	2.93318	1.70104	4.93457	2.45655	8.83869	2.16764	6.09915	8.86302	5.92083	6.5284	5.75308	13.3499	3.32242	6.98242	5.18645	7.09591	5.92174	4.14732	5.92004	9.25248	9.75711	6.47108	16.3669
chr19_12463416_12463625	1.13295	6.04714	4.43989	8.26102	4.42931	4.55493	4.86213	4.53587	4.26727	3.68624	9.16652	8.39119	11.0778	4.88863	5.10312	8.88223	2.45655	3.53548	17.3411	8.1322	1.10788	3.38333	9.32628	4.79423	1.02691	6.64483	5.98493	2.59323	2.66097	7.89565	2.48839	5.92004	7.57021	4.06546	2.77332	7.0144
chr19_12779538_12779745	4.53182	4.03143	15.0956	4.13051	4.42931	7.28789	9.72427	6.35022	6.82764	3.68624	6.41656	6.52648	6.15435	4.88863	4.2526	4.93457	2.45655	4.41934	5.4191	7.11567	6.64726	5.92083	5.59577	4.79423	2.05382	4.42989	8.9774	6.91527	6.20893	1.97391	3.31785	7.40005	7.57021	4.87855	6.47108	9.35254
chr19_13043317_13043613	10.1966	6.04714	4.43989	7.43492	8.85862	2.73296	3.88971	4.53587	9.388	5.52936	6.41656	17.7147	6.15435	4.88863	3.40208	8.88223	4.91311	6.18708	9.75439	8.1322	7.75514	5.07499	11.1915	7.67077	8.2153	1.10747	5.98493	4.32204	7.9829	8.88261	4.14732	2.22001	10.9348	11.3833	5.54664	9.35254
chr19_13586291_13586498	5.66477	9.07071	7.10383	6.60881	6.20104	4.55493	4.86213	0.907174	1.70691	5.52936	0.916652	6.52648	6.15435	9.77727	2.55156	9.86915	4.91311	3.53548	16.2573	8.1322	3.32363	4.22916	3.73051	2.87654	6.16147	8.85978	3.98995	3.45763	4.43495	6.90869	4.97678	4.44003	2.5234	4.06546	7.39552	1.16907
chr19_14090818_14091018	5.66477	2.01571	6.21585	7.43492	4.42931	2.73296	6.80699	5.44304	2.56036	3.68624	4.58326	9.32354	3.69261	3.91091	4.2526	4.93457	7.36966	4.41934	3.25146	3.04957	4.43151	5.07499	5.59577	4.79423	3.08074	4.42989	2.99247	6.91527	5.32194	8.88261	3.31785	4.44003	5.04681	8.94402	2.77332	17.536
chr19_14311993_14312197	5.66477	0	3.55191	1.6522	6.20104	3.64395	3.88971	4.53587	3.41382	1.84312	3.66661	5.59413	3.69261	3.91091	3.40208	8.88223	3.68483	15.0258	4.33528	5.08262	3.32363	6.76666	3.73051	3.83538	5.13456	5.53736	3.98995	3.45763	3.54796	8.88261	4.14732	2.96002	3.36454	2.43928	3.69776	5.84534
chr19_14388461_14388661	5.66477	4.03143	7.9918	5.78271	5.31517	8.19888	4.86213	5.44304	15.3622	6.45092	5.49991	4.66177	7.38523	5.86636	6.80416	7.89532	3.68483	2.65161	3.25146	3.04957	4.43151	4.22916	3.73051	7.67077	4.10765	7.75231	3.98995	3.45763	7.09591	6.90869	6.6357	2.96002	10.9348	5.69165	8.31996	7.0144
chr19_14569771_14569971	14.7284	6.04714	2.66393	2.47831	7.0869	4.55493	8.75184	5.44304	5.97418	6.45092	2.74995	4.66177	6.15435	6.84409	6.80416	5.92149	8.59794	3.53548	9.75439	4.0661	1.10788	6.76666	9.32628	5.75308	5.13456	3.32242	3.98995	2.59323	7.09591	4.93478	6.6357	5.18003	1.68227	5.69165	3.69776	7.0144
chr19_14586170_14586370	16.9943	3.02357	8.87978	7.43492	11.5162	10.0209	10.6967	8.16456	1.70691	7.37248	2.74995	6.52648	7.38523	5.86636	6.80416	11.843	1.22828	3.53548	14.0897	9.14872	3.32363	2.5375	3.73051	8.62962	4.10765	3.32242	8.9774	4.32204	6.20893	9.86956	9.12409	4.44003	4.20567	5.69165	5.54664	4.67627
chr19_15136173_15136373	2.26591	4.03143	2.66393	5.78271	9.74449	7.28789	6.80699	5.44304	7.68109	4.6078	9.16652	4.66177	6.15435	3.91091	14.4588	9.86915	3.68483	5.30321	4.33528	7.11567	3.32363	6.76666	5.59577	2.87654	4.10765	9.96725	3.98995	4.32204	2.66097	3.94782	4.97678	4.44003	5.88794	5.69165	4.6222	2.33813
chr19_15457289_15457507	4.53182	10.0786	13.3197	5.78271	3.54345	2.73296	6.80699	7.25739	7.68109	11.0587	8.24986	17.7147	4.92348	9.77727	4.2526	5.92149	9.82622	5.30321	4.33528	6.09915	6.64726	5.92083	5.59577	4.79423	6.16147	2.21494	10.9724	6.05086	5.32194	4.93478	9.12409	3.70002	9.25248	5.69165	4.6222	7.0144
chr19_15841222_15841447	7.93068	7.055	8.87978	6.60881	2.65759	5.46592	2.91728	4.53587	5.12073	7.37248	1.8333	6.52648	18.4631	7.82182	8.5052	5.92149	6.14139	7.95482	6.50292	4.0661	5.53938	4.22916	2.79788	4.79423	7.18839	8.85978	3.98995	4.32204	5.32194	7.89565	11.6125	5.92004	4.20567	4.06546	4.6222	2.33813
chr19_16739101_16739301	6.79773	9.07071	11.5437	14.0437	12.4021	12.7538	11.6691	8.16456	9.388	9.2156	4.58326	13.9853	13.5396	13.6882	17.8609	12.8299	9.82622	7.07095	8.67057	18.2974	6.64726	19.4541	8.39365	12.465	12.3229	17.7196	10.9724	10.3729	6.20893	11.8435	9.12409	9.62006	9.25248	8.13092	11.0933	10.5216
chr19_17208961_17209170	5.66477	6.04714	3.55191	9.91322	8.85862	7.28789	7.77942	4.53587	5.12073	5.52936	5.49991	12.1206	4.92348	6.84409	1.70104	4.93457	9.82622	4.41934	9.75439	3.04957	5.53938	5.92083	5.59577	7.67077	4.10765	7.75231	14.9623	6.91527	7.09591	2.96087	3.31785	6.66004	9.25248	6.50474	1.84888	3.5072
chr19_18029365_18029596	4.53182	3.02357	5.32787	8.26102	5.31517	9.10987	4.86213	6.35022	9.388	4.6078	10.0832	9.32354	2.46174	4.88863	2.55156	3.94766	8.59794	5.30321	3.25146	2.03305	3.32363	5.07499	8.39365	2.87654	2.05382	6.64483	5.98493	4.32204	6.20893	8.88261	4.14732	5.18003	3.36454	4.87855	3.69776	3.5072
chr19_18202046_18202264	4.53182	9.07071	5.32787	7.43492	3.54345	6.37691	0.972427	6.35022	6.82764	7.37248	9.16652	17.7147	2.46174	8.79954	4.2526	0.986915	3.68483	5.30321	5.4191	10.1652	5.53938	7.61249	4.66314	5.75308	7.18839	9.96725	2.99247	6.91527	7.9829	3.94782	7.46517	9.62006	7.57021	7.31783	6.47108	8.18347
chr19_18390979_18391179	6.79773	3.02357	6.21585	4.13051	5.31517	6.37691	9.72427	6.35022	5.12073	6.45092	10.0832	9.32354	4.92348	5.86636	3.40208	9.86915	7.36966	9.72256	4.33528	12.1983	9.97089	6.76666	5.59577	6.71192	7.18839	15.5046	10.9724	6.05086	8.86989	1.97391	7.46517	11.1001	4.20567	11.3833	11.0933	4.67627
chr19_18529972_18530257	10.1966	10.0786	9.76776	15.6959	8.85862	9.10987	16.5313	10.8861	11.9484	11.9803	9.16652	9.32354	13.5396	12.7104	14.4588	9.86915	9.82622	10.6064	4.33528	13.2148	24.3733	10.15	8.39365	10.5473	9.24221	13.2897	9.97489	11.2373	7.09591	8.88261	9.12409	10.3601	13.4582	17.0749	14.791	8.18347
chr19_18788926_18789185	11.3295	9.07071	8.87978	14.8698	4.42931	16.3978	9.72427	8.16456	11.0949	11.9803	7.33321	8.39119	2.46174	5.86636	5.10312	5.92149	9.82622	7.95482	10.8382	8.1322	5.53938	7.61249	9.32628	10.5473	6.16147	9.96725	8.9774	11.2373	7.9829	6.90869	15.7598	5.92004	10.0936	7.31783	10.1688	3.5072
chr19_19431807_19432040	6.79773	5.03928	5.32787	7.43492	7.97276	19.1307	1.94485	12.7004	11.0949	5.52936	3.66661	7.45883	4.92348	8.79954	11.0568	2.96074	6.14139	6.18708	6.50292	7.11567	7.75514	3.38333	10.2589	5.75308	5.13456	6.64483	7.97991	7.77968	2.66097	3.94782	9.12409	4.44003	5.04681	6.50474	8.31996	3.5072
chr19_19774757_19774988	4.53182	8.06285	20.4235	11.5654	7.97276	8.19888	12.6415	11.7933	9.388	10.1372	9.16652	18.6471	8.6161	6.84409	11.0568	3.94766	1.22828	12.3742	7.58674	11.1818	13.2945	11.8417	10.2589	4.79423	13.3499	11.0747	14.9623	4.32204	4.43495	12.8304	10.783	7.40005	15.9816	10.5702	5.54664	9.35254
chr19_20341945_20342157	6.79773	4.03143	7.10383	4.13051	7.0869	8.19888	5.83456	5.44304	7.68109	7.37248	1.8333	2.79706	2.46174	1.95545	4.2526	4.93457	4.91311	6.18708	2.16764	5.08262	5.53938	5.07499	7.46102	2.87654	5.13456	14.3971	7.97991	6.05086	4.43495	4.93478	7.46517	4.44003	7.57021	4.87855	9.2444	2.33813
chr19_21065622_21065858	5.66477	6.04714	5.32787	4.13051	5.31517	7.28789	4.86213	9.97891	5.12073	5.52936	1.8333	2.79706	1.23087	10.755	5.10312	7.89532	6.14139	8.83869	5.4191	7.11567	7.75514	4.22916	4.66314	1.91769	6.16147	5.53736	3.98995	1.72882	6.20893	14.8043	4.14732	8.14005	5.04681	5.69165	6.47108	5.84534
chr19_21163183_21163455	4.53182	8.06285	4.43989	0.826102	6.20104	2.73296	6.80699	6.35022	6.82764	8.29404	9.16652	8.39119	8.6161	6.84409	8.5052	9.86915	9.82622	7.07095	16.2573	11.1818	1.10788	14.3791	5.59577	9.58846	6.16147	7.75231	11.9699	7.77968	6.20893	4.93478	4.97678	3.70002	5.88794	9.75711	5.54664	1.16907
chr19_22086350_22086550	3.39886	5.03928	4.43989	4.13051	7.0869	4.55493	4.86213	3.62869	2.56036	11.9803	3.66661	4.66177	6.15435	6.84409	4.2526	7.89532	3.68483	15.0258	4.33528	9.14872	5.53938	3.38333	6.5284	3.83538	3.08074	2.21494	7.97991	4.32204	6.20893	5.92174	6.6357	4.44003	5.04681	4.87855	6.47108	9.35254
chr19_22701247_22701453	3.39886	4.03143	6.21585	9.08712	6.20104	4.55493	5.83456	1.81435	3.41382	4.6078	0.916652	2.79706	3.69261	0.977727	4.2526	5.92149	1.22828	5.30321	6.50292	8.1322	8.86302	4.22916	4.66314	6.71192	6.16147	7.75231	1.99498	3.45763	2.66097	1.97391	1.65893	4.44003	14.2993	7.31783	1.84888	2.33813
chr19_23101785_23101999	5.66477	7.055	2.66393	7.43492	4.42931	14.5758	1.94485	2.72152	4.26727	5.52936	3.66661	5.59413	4.92348	1.95545	7.65468	5.92149	1.22828	6.18708	4.33528	6.09915	2.21575	4.22916	4.66314	8.62962	4.10765	6.64483	1.99498	4.32204	5.32194	2.96087	4.14732	1.48001	6.72908	6.50474	1.84888	7.0144
chr19_23457765_23457993	11.3295	14.11	2.66393	13.2176	14.1738	8.19888	12.6415	19.0506	11.0949	17.5096	13.7498	13.053	4.92348	7.82182	5.95364	15.7906	9.82622	16.7935	8.67057	12.1983	8.86302	15.225	13.9894	5.75308	16.4306	11.0747	17.9548	6.91527	15.9658	10.8565	12.4419	14.0601	12.617	12.1964	16.6399	30.3957
chr19_23469671_23469893	4.53182	6.04714	4.43989	8.26102	3.54345	2.73296	4.86213	3.62869	5.97418	1.84312	6.41656	1.86471	8.6161	3.91091	6.80416	5.92149	2.45655	6.18708	5.4191	3.04957	7.75514	5.07499	7.46102	4.79423	9.24221	4.42989	9.97489	5.18645	7.09591	15.7913	9.12409	2.96002	4.20567	7.31783	5.54664	5.84534
chr19_23509919_23510214	5.66477	8.06285	2.66393	5.78271	7.97276	5.46592	4.86213	4.53587	6.82764	3.68624	5.49991	5.59413	3.69261	3.91091	1.70104	4.93457	4.91311	4.41934	8.67057	4.0661	3.32363	3.38333	8.39365	12.465	19.5113	2.21494	3.98995	2.59323	11.5309	9.86956	8.29463	5.92004	10.9348	12.1964	6.47108	7.0144
chr19_23709982_23710188	1.13295	3.02357	6.21585	4.95661	3.54345	5.46592	4.86213	7.25739	2.56036	7.37248	5.49991	8.39119	1.23087	5.86636	6.80416	8.88223	4.91311	4.41934	6.50292	5.08262	15.5103	5.92083	3.73051	2.87654	6.16147	4.42989	3.98995	1.72882	6.20893	5.92174	7.46517	6.66004	5.88794	6.50474	4.6222	4.67627
chr19_23969307_23969515	2.26591	4.03143	3.55191	3.30441	3.54345	3.64395	7.77942	8.16456	14.5087	4.6078	7.33321	6.52648	2.46174	2.93318	5.95364	5.92149	7.36966	5.30321	0	1.01652	3.32363	2.5375	3.73051	4.79423	3.08074	2.21494	5.98493	4.32204	3.54796	8.88261	5.80624	8.88006	4.20567	3.25237	4.6222	2.33813
chr19_28499329_28499550	18.1273	6.04714	2.66393	12.3915	10.6303	1.82197	5.83456	7.25739	5.12073	5.52936	4.58326	5.59413	4.92348	3.91091	5.95364	5.92149	3.68483	5.30321	7.58674	4.0661	6.64726	2.5375	4.66314	5.75308	7.18839	7.75231	3.98995	3.45763	6.20893	2.96087	4.14732	5.92004	6.72908	6.50474	3.69776	5.84534
chr19_28728920_28729120	1.13295	8.06285	4.43989	1.6522	4.42931	5.46592	7.77942	5.44304	1.70691	5.52936	3.66661	4.66177	4.92348	3.91091	11.0568	4.93457	2.45655	8.83869	1.08382	3.04957	3.32363	7.61249	2.79788	6.71192	2.05382	4.42989	4.98744	10.3729	5.32194	5.92174	5.80624	5.18003	3.36454	6.50474	5.54664	16.3669
chr19_29028179_29028379	2.26591	9.07071	4.43989	4.13051	2.65759	5.46592	7.77942	6.35022	4.26727	3.68624	3.66661	3.72942	6.15435	4.88863	10.2062	5.92149	11.0545	7.07095	3.25146	5.08262	7.75514	5.92083	4.66314	2.87654	4.10765	2.21494	4.98744	6.91527	7.09591	5.92174	2.48839	5.92004	4.20567	4.87855	3.69776	14.0288
chr19_29478399_29478599	3.39886	10.0786	6.21585	4.95661	9.74449	1.82197	1.94485	4.53587	4.26727	5.52936	5.49991	3.72942	3.69261	2.93318	4.2526	1.97383	4.91311	8.83869	3.25146	3.04957	4.43151	4.22916	6.5284	4.79423	6.16147	15.5046	3.98995	7.77968	7.09591	8.88261	4.14732	7.40005	3.36454	4.06546	4.6222	4.67627
chr19_29703672_29703892	6.79773	10.0786	8.87978	7.43492	5.31517	4.55493	13.614	8.16456	6.82764	2.76468	8.24986	1.86471	8.6161	6.84409	14.4588	5.92149	1.22828	4.41934	7.58674	9.14872	8.86302	6.76666	4.66314	7.67077	9.24221	7.75231	5.98493	6.05086	5.32194	8.88261	5.80624	5.92004	10.9348	9.75711	6.47108	2.33813
chr19_30027587_30027787	6.79773	5.03928	3.55191	2.47831	3.54345	3.64395	12.6415	3.62869	4.26727	5.52936	3.66661	2.79706	3.69261	4.88863	3.40208	5.92149	3.68483	2.65161	4.33528	5.08262	0	5.07499	6.5284	5.75308	2.05382	3.32242	2.99247	6.05086	2.66097	4.93478	2.48839	5.18003	5.04681	4.06546	5.54664	5.84534
chr19_31491181_31491385	3.39886	2.01571	5.32787	3.30441	1.77172	2.73296	4.86213	6.35022	13.6553	3.68624	7.33321	5.59413	3.69261	1.95545	5.10312	5.92149	8.59794	1.76774	5.4191	4.0661	6.64726	6.76666	4.66314	3.83538	5.13456	3.32242	7.97991	8.64408	9.75688	2.96087	3.31785	3.70002	5.88794	8.13092	6.47108	8.18347
chr19_32742739_32742939	3.39886	4.03143	4.43989	4.95661	4.42931	8.19888	6.80699	6.35022	2.56036	2.76468	7.33321	2.79706	7.38523	7.82182	7.65468	6.9084	3.68483	5.30321	13.0058	8.1322	1.10788	5.92083	7.46102	8.62962	3.08074	3.32242	3.98995	7.77968	1.77398	3.94782	7.46517	5.92004	4.20567	6.50474	5.54664	3.5072
chr19_33241578_33241857	9.06364	11.0864	6.21585	5.78271	9.74449	11.8428	8.75184	5.44304	4.26727	6.45092	10.0832	5.59413	8.6161	10.755	6.80416	4.93457	7.36966	11.4903	8.67057	14.2313	12.1866	11.8417	1.86526	7.67077	7.18839	11.0747	24.9372	11.2373	7.9829	2.96087	4.14732	7.40005	6.72908	11.3833	10.1688	10.5216
chr19_33435351_33435609	7.93068	2.01571	5.32787	4.13051	3.54345	2.73296	18.4761	4.53587	5.12073	2.76468	9.16652	1.86471	3.69261	9.77727	8.5052	7.89532	6.14139	7.07095	2.16764	9.14872	7.75514	5.07499	8.39365	3.83538	7.18839	4.42989	9.97489	5.18645	7.09591	7.89565	3.31785	5.18003	6.72908	7.31783	4.6222	2.33813
chr19_33820737_33820960	5.66477	2.01571	7.9918	2.47831	9.74449	7.28789	6.80699	1.81435	6.82764	6.45092	5.49991	6.52648	4.92348	4.88863	7.65468	3.94766	11.0545	1.76774	8.67057	5.08262	2.21575	5.92083	3.73051	13.4238	4.10765	4.42989	5.98493	6.05086	7.9829	3.94782	6.6357	5.18003	15.9816	9.75711	5.54664	3.5072
chr19_34643662_34643862	4.53182	6.04714	4.43989	5.78271	3.54345	1.82197	7.77942	6.35022	8.53455	6.45092	0.916652	4.66177	2.46174	7.82182	6.80416	4.93457	2.45655	7.07095	5.4191	11.1818	14.4024	2.5375	2.79788	3.83538	4.10765	3.32242	8.9774	4.32204	5.32194	8.88261	2.48839	3.70002	5.88794	5.69165	9.2444	8.18347
chr19_35509380_35509620	3.39886	4.03143	4.43989	4.13051	8.85862	5.46592	7.77942	6.35022	4.26727	7.37248	7.33321	2.79706	4.92348	5.86636	9.35572	7.89532	6.14139	5.30321	4.33528	4.0661	0	8.45832	4.66314	2.87654	6.16147	4.42989	14.9623	6.05086	4.43495	8.88261	8.29463	8.14005	4.20567	5.69165	4.6222	5.84534
chr19_35540311_35540511	14.7284	4.03143	6.21585	2.47831	9.74449	7.28789	7.77942	3.62869	6.82764	1.84312	5.49991	3.72942	6.15435	2.93318	4.2526	5.92149	4.91311	3.53548	3.25146	9.14872	3.32363	6.76666	1.86526	2.87654	11.296	6.64483	2.99247	4.32204	8.86989	0.986956	6.6357	1.48001	8.41135	6.50474	6.47108	2.33813
chr19_35645662_35645903	3.39886	5.03928	9.76776	5.78271	10.6303	6.37691	8.75184	5.44304	7.68109	4.6078	9.16652	10.2559	20.9248	8.79954	5.95364	7.89532	4.91311	6.18708	4.33528	5.08262	5.53938	6.76666	5.59577	7.67077	3.08074	3.32242	8.9774	10.3729	7.9829	5.92174	10.783	5.92004	4.20567	6.50474	4.6222	3.5072
chr19_35938396_35938606	2.26591	5.03928	2.66393	2.47831	7.0869	5.46592	6.80699	3.62869	5.97418	11.0587	4.58326	6.52648	3.69261	8.79954	3.40208	5.92149	8.59794	4.41934	5.4191	4.0661	6.64726	6.76666	8.39365	4.79423	8.2153	3.32242	4.98744	8.64408	7.09591	16.7783	6.6357	5.18003	7.57021	5.69165	7.39552	4.67627
chr19_35941434_35941638	4.53182	7.055	6.21585	0.826102	7.0869	5.46592	1.94485	1.81435	2.56036	4.6078	5.49991	4.66177	2.46174	4.88863	12.7578	9.86915	6.14139	7.95482	4.33528	6.09915	6.64726	6.76666	1.86526	5.75308	2.05382	1.10747	5.98493	3.45763	3.54796	6.90869	3.31785	4.44003	5.88794	5.69165	8.31996	2.33813
chr19_36063889_36064089	4.53182	3.02357	5.32787	3.30441	7.0869	5.46592	5.83456	5.44304	5.97418	6.45092	9.16652	12.1206	13.5396	7.82182	5.10312	11.843	2.45655	8.83869	5.4191	4.0661	4.43151	5.07499	4.66314	3.83538	3.08074	2.21494	6.98242	4.32204	4.43495	3.94782	10.783	6.66004	6.72908	5.69165	7.39552	4.67627
chr19_36351819_36352019	3.39886	4.03143	6.21585	4.95661	5.31517	4.55493	7.77942	3.62869	4.26727	0	3.66661	5.59413	2.46174	3.91091	13.6083	5.92149	2.45655	5.30321	4.33528	7.11567	6.64726	5.92083	6.5284	8.62962	3.08074	3.32242	1.99498	4.32204	3.54796	4.93478	5.80624	5.92004	5.88794	8.94402	6.47108	8.18347
chr19_36401722_36401922	13.5955	6.04714	14.2077	4.95661	8.85862	8.19888	2.91728	7.25739	6.82764	3.68624	2.74995	5.59413	6.15435	3.91091	10.2062	3.94766	8.59794	5.30321	8.67057	6.09915	4.43151	6.76666	5.59577	3.83538	4.10765	3.32242	3.98995	4.32204	6.20893	3.94782	7.46517	7.40005	5.88794	4.87855	5.54664	3.5072
chr19_36449969_36450234	4.53182	8.06285	6.21585	4.13051	7.97276	7.28789	6.80699	4.53587	16.2156	12.9018	4.58326	4.66177	6.15435	3.91091	5.95364	6.9084	6.14139	11.4903	5.4191	7.11567	5.53938	12.6875	4.66314	5.75308	6.16147	8.85978	8.9774	4.32204	7.09591	0.986956	9.12409	5.92004	4.20567	11.3833	7.39552	9.35254
chr19_36606189_36606424	10.1966	4.03143	9.76776	14.8698	8.85862	19.1307	5.83456	5.44304	9.388	11.9803	5.49991	10.2559	9.84697	8.79954	6.80416	10.8561	9.82622	6.18708	5.4191	6.09915	11.0788	12.6875	13.0568	7.67077	11.296	5.53736	5.98493	16.4238	15.0788	13.8174	12.4419	8.88006	10.0936	4.06546	10.1688	11.6907
chr19_36733188_36733394	9.06364	4.03143	1.77596	3.30441	1.77172	5.46592	4.86213	2.72152	2.56036	5.52936	6.41656	3.72942	0	4.88863	14.4588	6.9084	7.36966	4.41934	5.4191	5.08262	4.43151	2.5375	4.66314	11.5062	4.10765	3.32242	3.98995	7.77968	6.20893	6.90869	4.97678	4.44003	2.5234	4.87855	2.77332	8.18347
chr19_37048379_37048579	10.1966	7.055	4.43989	6.60881	5.31517	5.46592	4.86213	7.25739	10.2415	8.29404	9.16652	2.79706	6.15435	5.86636	0	3.94766	4.91311	5.30321	15.1735	1.01652	3.32363	2.5375	5.59577	5.75308	5.13456	1.10747	3.98995	5.18645	6.20893	7.89565	3.31785	7.40005	5.88794	5.69165	7.39552	3.5072
chr19_37096788_37097088	9.06364	8.06285	4.43989	8.26102	4.42931	8.19888	1.94485	3.62869	8.53455	6.45092	9.16652	8.39119	11.0778	9.77727	17.0104	3.94766	6.14139	3.53548	7.58674	6.09915	6.64726	7.61249	2.79788	9.58846	7.18839	12.1822	5.98493	4.32204	4.43495	8.88261	7.46517	4.44003	5.88794	3.25237	6.47108	10.5216
chr19_37156216_37156426	4.53182	3.02357	7.9918	9.08712	9.74449	8.19888	5.83456	8.16456	2.56036	5.52936	5.49991	10.2559	4.92348	10.755	5.10312	2.96074	1.22828	2.65161	17.3411	11.1818	6.64726	8.45832	3.73051	5.75308	5.13456	5.53736	7.97991	4.32204	5.32194	6.90869	4.14732	6.66004	5.88794	6.50474	4.6222	9.35254
chr19_37425456_37425662	7.93068	5.03928	3.55191	3.30441	4.42931	6.37691	2.91728	5.44304	2.56036	3.68624	3.66661	7.45883	11.0778	2.93318	5.95364	6.9084	7.36966	10.6064	17.3411	6.09915	8.86302	9.30416	3.73051	4.79423	5.13456	1.10747	2.99247	3.45763	5.32194	2.96087	7.46517	5.92004	4.20567	1.62618	3.69776	8.18347
chr19_37861863_37862071	9.06364	9.07071	5.32787	4.13051	2.65759	6.37691	10.6967	13.6076	6.82764	10.1372	5.49991	6.52648	6.15435	9.77727	8.5052	7.89532	11.0545	8.83869	11.922	9.14872	11.0788	7.61249	7.46102	5.75308	4.10765	18.827	6.98242	6.05086	9.75688	7.89565	10.783	5.92004	14.2993	3.25237	7.39552	4.67627
chr19_38310560_38310808	5.66477	2.01571	0	6.60881	7.0869	3.64395	7.77942	4.53587	5.12073	6.45092	4.58326	6.52648	4.92348	2.93318	5.10312	6.9084	8.59794	17.6774	3.25146	7.11567	5.53938	8.45832	6.5284	4.79423	2.05382	7.75231	5.98493	8.64408	5.32194	1.97391	7.46517	4.44003	3.36454	7.31783	3.69776	5.84534
chr19_38343992_38344192	4.53182	3.02357	7.9918	3.30441	4.42931	3.64395	10.6967	1.81435	7.68109	4.6078	1.8333	6.52648	2.46174	5.86636	5.95364	1.97383	3.68483	3.53548	15.1735	3.04957	5.53938	1.69166	0	4.79423	2.05382	7.75231	5.98493	6.91527	3.54796	1.97391	5.80624	1.48001	4.20567	6.50474	4.6222	3.5072
chr19_39552922_39553158	3.39886	5.03928	5.32787	4.95661	3.54345	5.46592	1.94485	4.53587	3.41382	3.68624	1.8333	6.52648	4.92348	3.91091	5.10312	8.88223	7.36966	2.65161	7.58674	7.11567	17.726	6.76666	3.73051	8.62962	7.18839	2.21494	4.98744	4.32204	5.32194	3.94782	3.31785	4.44003	5.04681	6.50474	4.6222	4.67627
chr19_39731227_39731429	5.66477	5.03928	6.21585	15.6959	5.31517	10.0209	5.83456	6.35022	7.68109	6.45092	8.24986	4.66177	8.6161	2.93318	7.65468	10.8561	7.36966	5.30321	1.08382	3.04957	7.75514	5.07499	7.46102	1.91769	2.05382	5.53736	0.997489	5.18645	2.66097	5.92174	4.14732	5.92004	8.41135	4.87855	5.54664	5.84534
chr19_39900233_39900524	10.1966	10.0786	9.76776	14.0437	6.20104	7.28789	7.77942	9.97891	10.2415	9.2156	9.16652	13.053	16.0013	5.86636	5.95364	5.92149	13.511	7.95482	9.75439	5.08262	18.8339	5.92083	12.1242	10.5473	7.18839	6.64483	9.97489	7.77968	12.4179	12.8304	9.12409	5.92004	12.617	10.5702	9.2444	11.6907
chr19_40268577_40268800	5.66477	7.055	6.21585	5.78271	4.42931	3.64395	7.77942	5.44304	1.70691	3.68624	3.66661	2.79706	2.46174	3.91091	8.5052	3.94766	6.14139	7.95482	2.16764	6.09915	15.5103	8.45832	9.32628	2.87654	3.08074	4.42989	7.97991	6.05086	7.09591	2.96087	8.29463	1.48001	5.88794	4.87855	4.6222	4.67627
chr19_40336889_40337107	11.3295	9.07071	9.76776	13.2176	5.31517	18.2197	8.75184	9.07174	6.82764	11.0587	13.7498	9.32354	6.15435	8.79954	8.5052	10.8561	6.14139	15.9096	6.50292	11.1818	6.64726	10.9958	11.1915	9.58846	8.2153	8.85978	1.99498	6.91527	2.66097	8.88261	4.97678	11.1001	5.04681	11.3833	7.39552	5.84534
chr19_40389508_40389723	2.26591	3.02357	3.55191	4.95661	6.20104	6.37691	3.88971	6.35022	7.68109	4.6078	2.74995	4.66177	7.38523	3.91091	5.10312	6.9084	3.68483	1.76774	4.33528	6.09915	16.6182	5.92083	5.59577	11.5062	1.02691	3.32242	3.98995	3.45763	6.20893	2.96087	6.6357	9.62006	4.20567	2.43928	6.47108	2.33813
chr19_40606265_40606484	2.26591	6.04714	2.66393	5.78271	4.42931	0	8.75184	3.62869	5.12073	1.84312	0.916652	1.86471	1.23087	0.977727	5.10312	3.94766	6.14139	1.76774	2.16764	2.03305	2.21575	5.07499	0	4.79423	2.05382	7.75231	0.997489	4.32204	2.66097	3.94782	1.65893	2.22001	3.36454	4.06546	2.77332	1.16907
chr19_40644536_40644736	5.66477	6.04714	5.32787	5.78271	4.42931	4.55493	2.91728	6.35022	5.97418	5.52936	4.58326	8.39119	0	2.93318	4.2526	6.9084	3.68483	4.41934	2.16764	8.1322	6.64726	2.5375	2.79788	4.79423	7.18839	5.53736	6.98242	6.91527	2.66097	16.7783	4.14732	2.96002	7.57021	9.75711	5.54664	7.0144
chr19_40939746_40939946	6.79773	7.055	9.76776	8.26102	7.0869	6.37691	9.72427	9.97891	5.12073	8.29404	4.58326	8.39119	16.0013	9.77727	9.35572	5.92149	14.7393	6.18708	5.4191	8.1322	15.5103	7.61249	7.46102	6.71192	6.16147	11.0747	8.9774	5.18645	8.86989	14.8043	8.29463	5.92004	7.57021	12.1964	9.2444	8.18347
chr19_41006393_41006612	3.39886	5.03928	1.77596	9.08712	6.20104	3.64395	0.972427	4.53587	4.26727	5.52936	0	2.79706	4.92348	6.84409	5.10312	6.9084	6.14139	8.83869	3.25146	5.08262	3.32363	9.30416	4.66314	6.71192	4.10765	4.42989	3.98995	12.1017	3.54796	17.7652	8.29463	5.18003	5.04681	8.13092	3.69776	5.84534
chr19_41679441_41679646	3.39886	3.02357	3.55191	4.13051	7.0869	4.55493	4.86213	5.44304	7.68109	4.6078	10.0832	18.6471	8.6161	3.91091	4.2526	6.9084	2.45655	2.65161	4.33528	4.0661	5.53938	5.92083	8.39365	1.91769	7.18839	4.42989	6.98242	0.864408	5.32194	7.89565	4.14732	3.70002	5.04681	4.87855	5.54664	7.0144
chr19_41681973_41682332	7.93068	13.1021	11.5437	12.3915	9.74449	9.10987	2.91728	8.16456	11.9484	3.68624	10.0832	7.45883	8.6161	4.88863	7.65468	9.86915	9.82622	7.07095	7.58674	7.11567	3.32363	10.9958	9.32628	7.67077	10.2691	9.96725	8.9774	5.18645	7.09591	11.8435	6.6357	8.88006	19.3461	4.87855	9.2444	8.18347
chr19_41790289_41790491	5.66477	7.055	2.66393	4.13051	6.20104	14.5758	5.83456	6.35022	5.12073	10.1372	4.58326	7.45883	2.46174	5.86636	3.40208	3.94766	4.91311	8.83869	10.8382	4.0661	1.10788	8.45832	1.86526	6.71192	10.2691	7.75231	4.98744	3.45763	6.20893	6.90869	5.80624	10.3601	7.57021	6.50474	4.6222	2.33813
chr19_42230377_42230577	5.66477	2.01571	5.32787	6.60881	4.42931	3.64395	4.86213	2.72152	6.82764	4.6078	6.41656	2.79706	9.84697	5.86636	8.5052	8.88223	3.68483	5.30321	9.75439	5.08262	6.64726	5.07499	4.66314	1.91769	2.05382	2.21494	0	4.32204	2.66097	15.7913	4.97678	4.44003	5.88794	2.43928	4.6222	4.67627
chr19_42314444_42314644	7.93068	3.02357	3.55191	3.30441	8.85862	6.37691	7.77942	1.81435	12.8018	5.52936	6.41656	7.45883	7.38523	5.86636	10.2062	5.92149	3.68483	7.07095	1.08382	3.04957	8.86302	7.61249	4.66314	2.87654	4.10765	2.21494	7.97991	5.18645	0.886989	7.89565	7.46517	5.92004	5.88794	8.94402	2.77332	3.5072
chr19_42543306_42543586	18.1273	6.04714	1.77596	4.95661	5.31517	11.8428	7.77942	3.62869	5.12073	8.29404	4.58326	9.32354	7.38523	1.95545	6.80416	3.94766	4.91311	9.72256	7.58674	6.09915	8.86302	9.30416	5.59577	2.87654	5.13456	2.21494	2.99247	5.18645	7.9829	4.93478	6.6357	7.40005	4.20567	4.87855	6.47108	3.5072
chr19_42622213_42622460	3.39886	6.04714	9.76776	4.95661	8.85862	15.4868	6.80699	8.16456	9.388	5.52936	4.58326	5.59413	4.92348	1.95545	1.70104	8.88223	1.22828	7.07095	8.67057	4.0661	5.53938	9.30416	2.79788	4.79423	6.16147	6.64483	8.9774	6.91527	6.20893	6.90869	7.46517	6.66004	5.88794	8.94402	6.47108	10.5216
chr19_42626224_42626424	3.39886	7.055	7.10383	2.47831	1.77172	6.37691	2.91728	8.16456	6.82764	5.52936	3.66661	6.52648	4.92348	5.86636	13.6083	0.986915	7.36966	9.72256	6.50292	3.04957	4.43151	5.92083	3.73051	3.83538	8.2153	4.42989	6.98242	1.72882	4.43495	6.90869	6.6357	6.66004	6.72908	4.06546	5.54664	7.0144
chr19_42817844_42818056	5.66477	10.0786	4.43989	12.3915	8.85862	5.46592	12.6415	3.62869	5.12073	8.29404	6.41656	10.2559	1.23087	3.91091	7.65468	0.986915	2.45655	8.83869	7.58674	10.1652	0	7.61249	1.86526	8.62962	8.2153	6.64483	7.97991	6.05086	5.32194	7.89565	6.6357	4.44003	6.72908	4.87855	3.69776	2.33813
chr19_43311531_43311731	6.79773	2.01571	4.43989	4.13051	2.65759	3.64395	4.86213	2.72152	3.41382	1.84312	5.49991	1.86471	3.69261	5.86636	3.40208	2.96074	1.22828	2.65161	8.67057	3.04957	2.21575	2.5375	0.932628	0	5.13456	8.85978	6.98242	4.32204	0.886989	1.97391	7.46517	1.48001	2.5234	3.25237	4.6222	4.67627
chr19_44282241_44282452	5.66477	10.0786	8.87978	6.60881	6.20104	3.64395	4.86213	9.07174	17.0691	3.68624	4.58326	5.59413	6.15435	7.82182	5.95364	5.92149	8.59794	4.41934	7.58674	1.01652	4.43151	5.07499	7.46102	6.71192	4.10765	4.42989	4.98744	6.91527	7.09591	6.90869	5.80624	2.96002	7.57021	4.06546	3.69776	4.67627
chr19_44745626_44745826	11.3295	3.02357	7.10383	5.78271	7.97276	6.37691	6.80699	2.72152	8.53455	7.37248	3.66661	6.52648	3.69261	4.88863	16.1599	1.97383	4.91311	5.30321	6.50292	5.08262	5.53938	4.22916	7.46102	2.87654	1.02691	4.42989	3.98995	6.91527	3.54796	2.96087	1.65893	6.66004	6.72908	4.06546	10.1688	3.5072
chr19_44779953_44780153	2.26591	4.03143	0.887978	4.95661	6.20104	3.64395	7.77942	6.35022	7.68109	11.0587	0.916652	2.79706	4.92348	3.91091	4.2526	7.89532	3.68483	6.18708	2.16764	6.09915	1.10788	2.5375	14.922	5.75308	2.05382	3.32242	2.99247	4.32204	3.54796	6.90869	5.80624	5.92004	5.04681	6.50474	2.77332	4.67627
chr19_44834762_44834962	3.39886	6.04714	3.55191	8.26102	3.54345	4.55493	15.5588	1.81435	6.82764	3.68624	4.58326	8.39119	8.6161	7.82182	1.70104	6.9084	3.68483	6.18708	0	7.11567	4.43151	5.92083	1.86526	7.67077	6.16147	4.42989	3.98995	4.32204	5.32194	6.90869	4.14732	5.18003	6.72908	5.69165	5.54664	3.5072
chr19_45104655_45104881	5.66477	8.06285	15.9836	3.30441	7.0869	10.9318	5.83456	6.35022	11.0949	4.6078	7.33321	3.72942	6.15435	7.82182	2.55156	7.89532	4.91311	3.53548	1.08382	7.11567	3.32363	5.07499	6.5284	7.67077	7.18839	3.32242	8.9774	6.05086	7.09591	4.93478	7.46517	5.92004	5.88794	5.69165	2.77332	1.16907
chr19_45298057_45298312	16.9943	3.02357	7.9918	4.13051	4.42931	7.28789	2.91728	6.35022	5.97418	7.37248	7.33321	3.72942	6.15435	9.77727	5.10312	5.92149	11.0545	8.83869	4.33528	3.04957	5.53938	5.92083	4.66314	6.71192	5.13456	4.42989	5.98493	6.91527	7.9829	6.90869	7.46517	7.40005	4.20567	2.43928	3.69776	5.84534
chr19_45922621_45922857	3.39886	6.04714	8.87978	9.08712	7.0869	10.9318	6.80699	6.35022	6.82764	5.52936	5.49991	5.59413	6.15435	15.6436	7.65468	9.86915	4.91311	6.18708	6.50292	4.0661	18.8339	5.92083	6.5284	8.62962	5.13456	8.85978	6.98242	3.45763	4.43495	7.89565	8.29463	13.3201	6.72908	4.06546	8.31996	8.18347
chr19_45944655_45944870	6.79773	9.07071	7.10383	12.3915	4.42931	6.37691	2.91728	4.53587	0.853455	9.2156	5.49991	6.52648	7.38523	5.86636	15.3094	7.89532	7.36966	10.6064	4.33528	9.14872	1.10788	3.38333	5.59577	10.5473	3.08074	3.32242	3.98995	0.864408	5.32194	6.90869	4.97678	3.70002	9.25248	3.25237	4.6222	7.0144
chr19_46830086_46830286	5.66477	1.00786	2.66393	4.13051	2.65759	3.64395	6.80699	2.72152	1.70691	3.68624	4.58326	12.1206	8.6161	8.79954	2.55156	6.9084	7.36966	4.41934	4.33528	5.08262	8.86302	4.22916	4.66314	8.62962	6.16147	5.53736	7.97991	5.18645	5.32194	6.90869	4.14732	6.66004	5.04681	3.25237	4.6222	5.84534
chr19_46838030_46838230	6.79773	11.0864	5.32787	7.43492	1.77172	2.73296	1.94485	7.25739	5.97418	3.68624	4.58326	6.52648	4.92348	4.88863	2.55156	4.93457	3.68483	7.07095	7.58674	7.11567	1.10788	5.92083	1.86526	8.62962	7.18839	2.21494	2.99247	5.18645	3.54796	8.88261	4.97678	4.44003	5.04681	4.87855	1.84888	12.8597
chr19_47283871_47284185	5.66477	10.0786	6.21585	7.43492	7.0869	10.0209	17.5037	9.07174	6.82764	7.37248	7.33321	6.52648	6.15435	7.82182	9.35572	5.92149	6.14139	10.6064	5.4191	5.08262	7.75514	14.3791	9.32628	6.71192	4.10765	11.0747	4.98744	7.77968	8.86989	9.86956	8.29463	7.40005	11.7759	5.69165	10.1688	9.35254
chr19_47363376_47363576	13.5955	7.055	10.6557	8.26102	9.74449	14.5758	4.86213	8.16456	9.388	10.1372	7.33321	4.66177	9.84697	2.93318	16.1599	7.89532	6.14139	13.258	6.50292	6.09915	7.75514	4.22916	12.1242	6.71192	8.2153	9.96725	7.97991	9.50849	8.86989	4.93478	4.97678	8.88006	4.20567	5.69165	6.47108	9.35254
chr19_47890469_47890669	6.79773	5.03928	6.21585	6.60881	9.74449	8.19888	7.77942	5.44304	1.70691	4.6078	9.16652	8.39119	8.6161	8.79954	1.70104	4.93457	6.14139	2.65161	7.58674	2.03305	3.32363	9.30416	5.59577	4.79423	9.24221	5.53736	1.99498	9.50849	7.09591	3.94782	2.48839	3.70002	6.72908	2.43928	6.47108	18.7051
chr19_48013301_48013501	4.53182	6.04714	3.55191	2.47831	4.42931	3.64395	3.88971	5.44304	13.6553	11.9803	4.58326	7.45883	2.46174	4.88863	6.80416	4.93457	3.68483	8.83869	3.25146	3.04957	5.53938	2.5375	7.46102	4.79423	4.10765	5.53736	2.99247	5.18645	7.09591	6.90869	0.829463	4.44003	10.0936	7.31783	1.84888	3.5072
chr19_48193557_48193784	4.53182	5.03928	14.2077	9.08712	12.4021	3.64395	5.83456	5.44304	11.9484	2.76468	4.58326	5.59413	4.92348	0	6.80416	5.92149	6.14139	5.30321	4.33528	8.1322	2.21575	5.07499	6.5284	6.71192	8.2153	5.53736	2.99247	3.45763	5.32194	4.93478	7.46517	1.48001	5.88794	8.13092	7.39552	9.35254
chr19_48333598_48333818	10.1966	7.055	3.55191	3.30441	4.42931	5.46592	5.83456	6.35022	3.41382	1.84312	7.33321	8.39119	2.46174	4.88863	7.65468	6.9084	6.14139	15.9096	3.25146	5.08262	6.64726	4.22916	4.66314	4.79423	5.13456	5.53736	5.98493	5.18645	5.32194	4.93478	6.6357	6.66004	5.88794	6.50474	5.54664	3.5072
chr19_48406913_48407113	0	2.01571	0	0	0	0	0.972427	1.81435	0.853455	0	2.74995	0	0	0.977727	0.85052	0.986915	2.45655	0	0	1.01652	1.10788	0.845832	2.79788	0.958846	1.02691	0	0	0	0	2.96087	1.65893	1.48001	2.5234	0	0.92444	0
chr19_48620667_48620867	3.39886	5.03928	6.21585	1.6522	8.85862	10.0209	14.5864	3.62869	5.12073	4.6078	7.33321	3.72942	11.0778	3.91091	8.5052	4.93457	3.68483	1.76774	6.50292	10.1652	6.64726	1.69166	6.5284	13.4238	4.10765	8.85978	3.98995	5.18645	3.54796	4.93478	4.14732	10.3601	2.5234	10.5702	4.6222	1.16907
chr19_48622185_48622385	4.53182	6.04714	2.66393	7.43492	2.65759	9.10987	10.6967	0.907174	5.97418	3.68624	5.49991	6.52648	11.0778	5.86636	5.95364	1.97383	2.45655	2.65161	2.16764	3.04957	2.21575	3.38333	2.79788	5.75308	2.05382	4.42989	5.98493	7.77968	4.43495	6.90869	2.48839	8.88006	2.5234	7.31783	7.39552	3.5072
chr19_49099127_49099333	5.66477	8.06285	8.87978	6.60881	7.97276	7.28789	5.83456	2.72152	3.41382	6.45092	4.58326	6.52648	1.23087	5.86636	2.55156	4.93457	7.36966	6.18708	4.33528	4.0661	11.0788	6.76666	9.32628	10.5473	5.13456	4.42989	7.97991	2.59323	7.09591	3.94782	2.48839	5.92004	15.9816	5.69165	9.2444	7.0144
chr19_49236238_49236470	7.93068	5.03928	3.55191	9.08712	10.6303	2.73296	4.86213	6.35022	14.5087	4.6078	5.49991	7.45883	2.46174	5.86636	5.10312	4.93457	8.59794	14.1419	3.25146	6.09915	8.86302	9.30416	1.86526	8.62962	7.18839	3.32242	2.99247	0.864408	4.43495	2.96087	4.97678	8.14005	9.25248	4.87855	5.54664	2.33813
chr19_49241500_49241700	5.66477	4.03143	7.10383	3.30441	7.0869	14.5758	2.91728	7.25739	6.82764	4.6078	0.916652	6.52648	2.46174	4.88863	7.65468	3.94766	2.45655	3.53548	10.8382	3.04957	1.10788	1.69166	5.59577	5.75308	10.2691	7.75231	5.98493	2.59323	7.09591	1.97391	4.97678	5.18003	3.36454	3.25237	3.69776	4.67627
chr19_49693824_49694061	16.9943	11.0864	3.55191	5.78271	3.54345	5.46592	2.91728	3.62869	5.12073	3.68624	1.8333	5.59413	8.6161	5.86636	2.55156	8.88223	2.45655	6.18708	10.8382	4.0661	6.64726	8.45832	5.59577	4.79423	8.2153	3.32242	6.98242	4.32204	7.09591	2.96087	4.14732	5.92004	6.72908	4.87855	3.69776	3.5072
chr19_49941429_49941629	3.39886	3.02357	3.55191	6.60881	7.0869	3.64395	3.88971	7.25739	1.70691	3.68624	4.58326	1.86471	8.6161	2.93318	3.40208	4.93457	4.91311	5.30321	7.58674	5.08262	7.75514	2.5375	5.59577	1.91769	4.10765	5.53736	9.97489	5.18645	1.77398	2.96087	4.97678	3.70002	5.88794	2.43928	1.84888	2.33813
chr19_49964402_49964789	6.79773	15.1179	12.4317	12.3915	7.97276	9.10987	12.6415	17.2363	12.8018	18.4312	18.333	9.32354	4.92348	10.755	7.65468	11.843	18.4242	14.1419	13.0058	11.1818	12.1866	9.30416	13.0568	12.465	13.3499	7.75231	13.9648	9.50849	9.75688	6.90869	19.9071	12.5801	11.7759	7.31783	6.47108	11.6907
chr19_50109549_50109753	6.79773	6.04714	7.10383	4.95661	7.0869	4.55493	2.91728	8.16456	5.97418	8.29404	5.49991	3.72942	18.4631	5.86636	5.95364	10.8561	6.14139	7.07095	7.58674	3.04957	4.43151	2.5375	4.66314	4.79423	5.13456	8.85978	6.98242	7.77968	2.66097	2.96087	9.95356	2.96002	5.04681	4.06546	3.69776	2.33813
chr19_50241225_50241451	6.79773	12.0943	3.55191	4.95661	11.5162	2.73296	4.86213	5.44304	3.41382	7.37248	7.33321	3.72942	6.15435	6.84409	5.95364	8.88223	8.59794	6.18708	2.16764	7.11567	7.75514	8.45832	6.5284	6.71192	5.13456	4.42989	3.98995	4.32204	7.9829	15.7913	4.97678	7.40005	10.0936	6.50474	9.2444	8.18347
chr19_51317248_51317451	1.13295	5.03928	2.66393	4.13051	4.42931	4.55493	7.77942	6.35022	2.56036	5.52936	8.24986	3.72942	6.15435	3.91091	1.70104	5.92149	8.59794	3.53548	6.50292	9.14872	3.32363	8.45832	1.86526	6.71192	4.10765	8.85978	5.98493	6.05086	7.09591	8.88261	2.48839	2.22001	5.04681	4.87855	0.92444	21.0432
chr19_51339041_51339494	13.5955	9.07071	11.5437	9.91322	7.97276	10.9318	9.72427	6.35022	13.6553	14.745	15.5831	13.053	9.84697	12.7104	6.80416	8.88223	7.36966	8.83869	15.1735	8.1322	9.97089	10.9958	6.5284	9.58846	20.5382	11.0747	6.98242	8.64408	17.7398	5.92174	9.95356	5.92004	11.7759	8.13092	4.6222	24.5504
chr19_51411318_51411518	3.39886	6.04714	3.55191	4.95661	5.31517	10.0209	3.88971	3.62869	4.26727	4.6078	6.41656	5.59413	1.23087	6.84409	5.10312	5.92149	4.91311	2.65161	5.4191	9.14872	7.75514	6.76666	2.79788	3.83538	6.16147	2.21494	6.98242	2.59323	8.86989	4.93478	3.31785	2.22001	4.20567	5.69165	4.6222	15.1979
chr19_51715388_51715588	2.26591	9.07071	3.55191	6.60881	3.54345	5.46592	4.86213	2.72152	3.41382	9.2156	6.41656	5.59413	1.23087	1.95545	6.80416	7.89532	6.14139	1.76774	3.25146	5.08262	5.53938	6.76666	3.73051	4.79423	5.13456	5.53736	15.9598	8.64408	3.54796	3.94782	8.29463	6.66004	5.04681	3.25237	5.54664	10.5216
chr19_52198584_52198784	3.39886	6.04714	4.43989	5.78271	6.20104	0	2.91728	4.53587	2.56036	2.76468	2.74995	3.72942	4.92348	3.91091	4.2526	9.86915	1.22828	5.30321	16.2573	5.08262	5.53938	7.61249	4.66314	4.79423	4.10765	2.21494	5.98493	5.18645	5.32194	2.96087	4.14732	5.92004	7.57021	4.06546	0	9.35254
chr19_52410824_52411084	5.66477	6.04714	5.32787	5.78271	6.20104	3.64395	0.972427	6.35022	0.853455	11.9803	4.58326	7.45883	7.38523	9.77727	10.2062	6.9084	8.59794	7.95482	7.58674	4.0661	14.4024	13.5333	6.5284	5.75308	5.13456	3.32242	3.98995	3.45763	8.86989	7.89565	9.12409	6.66004	7.57021	8.94402	8.31996	2.33813
chr19_52557695_52558018	7.93068	6.04714	8.87978	5.78271	4.42931	5.46592	6.80699	5.44304	3.41382	7.37248	5.49991	4.66177	16.0013	3.91091	6.80416	5.92149	6.14139	7.95482	5.4191	6.09915	7.75514	3.38333	9.32628	4.79423	4.10765	8.85978	6.98242	3.45763	6.20893	5.92174	7.46517	5.92004	5.04681	5.69165	5.54664	9.35254
chr19_52719285_52719485	4.53182	5.03928	4.43989	3.30441	6.20104	7.28789	4.86213	5.44304	13.6553	11.0587	5.49991	4.66177	3.69261	3.91091	5.95364	7.89532	7.36966	6.18708	5.4191	8.1322	1.10788	4.22916	3.73051	9.58846	2.05382	8.85978	3.98995	4.32204	7.09591	3.94782	8.29463	3.70002	8.41135	1.62618	2.77332	3.5072
chr19_52790523_52790723	0	6.04714	7.10383	3.30441	5.31517	2.73296	3.88971	7.25739	3.41382	7.37248	7.33321	3.72942	4.92348	5.86636	2.55156	6.9084	4.91311	8.83869	14.0897	12.1983	3.32363	5.92083	5.59577	7.67077	5.13456	8.85978	7.97991	4.32204	8.86989	7.89565	4.14732	5.92004	3.36454	2.43928	2.77332	7.0144
chr19_53419538_53419738	6.79773	6.04714	4.43989	4.13051	5.31517	6.37691	15.5588	5.44304	7.68109	4.6078	5.49991	8.39119	7.38523	4.88863	2.55156	3.94766	4.91311	2.65161	7.58674	5.08262	4.43151	5.07499	8.39365	3.83538	3.08074	5.53736	4.98744	2.59323	7.09591	5.92174	4.97678	4.44003	6.72908	6.50474	8.31996	4.67627
chr19_53597775_53598071	4.53182	3.02357	4.43989	6.60881	7.97276	10.0209	11.6691	7.25739	6.82764	5.52936	2.74995	6.52648	7.38523	2.93318	3.40208	6.9084	4.91311	5.30321	5.4191	6.09915	6.64726	5.07499	3.73051	8.62962	10.2691	12.1822	9.97489	6.05086	5.32194	22.7	6.6357	5.92004	9.25248	7.31783	7.39552	7.0144
chr19_53730409_53730613	13.5955	14.11	12.4317	14.8698	7.97276	8.19888	14.5864	12.7004	13.6553	15.6665	18.333	25.1736	13.5396	11.7327	10.2062	10.8561	12.2828	14.1419	9.75439	20.3305	14.4024	17.7625	11.1915	12.465	9.24221	15.5046	15.9598	17.2882	14.1918	15.7913	18.2482	16.2801	16.8227	12.1964	10.1688	22.2123
chr19_54046930_54047165	14.7284	3.02357	2.66393	9.08712	7.0869	5.46592	5.83456	2.72152	7.68109	7.37248	10.0832	5.59413	8.6161	6.84409	2.55156	6.9084	11.0545	7.95482	1.08382	6.09915	4.43151	10.15	2.79788	13.4238	5.13456	3.32242	7.97991	4.32204	4.43495	8.88261	5.80624	4.44003	5.04681	4.06546	10.1688	5.84534
chr19_54327494_54327694	9.06364	9.07071	6.21585	6.60881	6.20104	2.73296	6.80699	8.16456	9.388	6.45092	2.74995	2.79706	4.92348	5.86636	10.2062	5.92149	13.511	7.95482	4.33528	6.09915	2.21575	5.92083	1.86526	7.67077	14.3768	2.21494	9.97489	8.64408	4.43495	0.986956	7.46517	4.44003	15.1404	2.43928	4.6222	4.67627
chr19_54885347_54885547	6.79773	1.00786	7.9918	3.30441	1.77172	4.55493	10.6967	4.53587	10.2415	6.45092	9.16652	2.79706	14.7705	7.82182	5.95364	4.93457	6.14139	5.30321	14.0897	10.1652	7.75514	5.07499	8.39365	2.87654	5.13456	5.53736	6.98242	12.1017	7.9829	4.93478	7.46517	5.18003	2.5234	7.31783	6.47108	4.67627
chr19_55629095_55629295	7.93068	8.06285	12.4317	9.91322	4.42931	7.28789	6.80699	10.8861	13.6553	9.2156	2.74995	12.1206	11.0778	5.86636	8.5052	5.92149	13.511	7.95482	4.33528	10.1652	9.97089	8.45832	13.0568	6.71192	8.2153	7.75231	12.9674	10.3729	9.75688	6.90869	6.6357	4.44003	10.0936	4.87855	7.39552	8.18347
chr19_55945394_55945594	12.4625	7.055	6.21585	6.60881	4.42931	6.37691	7.77942	3.62869	6.82764	6.45092	2.74995	5.59413	7.38523	2.93318	2.55156	9.86915	3.68483	5.30321	8.67057	2.03305	5.53938	5.92083	8.39365	2.87654	5.13456	8.85978	1.99498	9.50849	9.75688	7.89565	4.97678	7.40005	5.88794	6.50474	6.47108	3.5072
chr19_55973156_55973356	5.66477	20.1571	14.2077	9.91322	13.2879	7.28789	11.6691	8.16456	11.0949	6.45092	5.49991	7.45883	14.7705	12.7104	4.2526	7.89532	6.14139	10.6064	7.58674	8.1322	2.21575	8.45832	7.46102	11.5062	10.2691	8.85978	4.98744	12.9661	11.5309	7.89565	4.97678	8.14005	5.88794	13.8226	15.7155	8.18347
chr19_56105380_56105580	3.39886	6.04714	5.32787	5.78271	3.54345	9.10987	6.80699	2.72152	5.12073	8.29404	3.66661	1.86471	2.46174	4.88863	5.10312	3.94766	8.59794	5.30321	2.16764	4.0661	15.5103	5.92083	5.59577	5.75308	1.02691	4.42989	3.98995	6.05086	5.32194	3.94782	4.97678	4.44003	1.68227	8.94402	6.47108	2.33813
chr19_56407244_56407444	4.53182	6.04714	7.10383	5.78271	2.65759	10.0209	2.91728	6.35022	5.12073	7.37248	3.66661	5.59413	3.69261	8.79954	5.10312	5.92149	2.45655	7.07095	16.2573	2.03305	8.86302	5.07499	5.59577	3.83538	3.08074	3.32242	0.997489	6.91527	4.43495	2.96087	4.97678	7.40005	7.57021	4.06546	7.39552	7.0144
chr19_56468367_56468567	4.53182	7.055	4.43989	0.826102	11.5162	10.0209	3.88971	7.25739	5.97418	3.68624	2.74995	3.72942	6.15435	0.977727	2.55156	8.88223	4.91311	4.41934	4.33528	4.0661	6.64726	3.38333	3.73051	0.958846	13.3499	3.32242	0	2.59323	4.43495	2.96087	4.14732	6.66004	3.36454	10.5702	3.69776	5.84534
chr19_56571570_56571795	3.39886	6.04714	5.32787	9.91322	3.54345	8.19888	2.91728	7.25739	5.12073	10.1372	10.0832	13.9853	1.23087	6.84409	5.10312	8.88223	9.82622	7.07095	8.67057	4.0661	1.10788	5.07499	8.39365	7.67077	2.05382	2.21494	6.98242	6.91527	7.9829	4.93478	1.65893	7.40005	4.20567	4.87855	4.6222	4.67627
chr19_57037160_57037375	2.26591	9.07071	2.66393	6.60881	9.74449	15.4868	3.88971	6.35022	6.82764	6.45092	5.49991	8.39119	3.69261	6.84409	9.35572	1.97383	4.91311	7.07095	2.16764	6.09915	2.21575	3.38333	6.5284	7.67077	4.10765	5.53736	7.97991	7.77968	6.20893	4.93478	5.80624	5.92004	5.88794	3.25237	1.84888	4.67627
chr19_57113522_57113722	3.39886	3.02357	5.32787	6.60881	3.54345	5.46592	1.94485	1.81435	1.70691	6.45092	1.8333	8.39119	6.15435	3.91091	3.40208	2.96074	8.59794	7.07095	3.25146	8.1322	7.75514	3.38333	1.86526	3.83538	8.2153	15.5046	3.98995	8.64408	2.66097	8.88261	5.80624	8.14005	3.36454	3.25237	8.31996	5.84534
chr19_57292681_57292881	9.06364	9.07071	3.55191	7.43492	5.31517	14.5758	7.77942	5.44304	5.12073	7.37248	3.66661	8.39119	1.23087	7.82182	5.10312	6.9084	3.68483	3.53548	2.16764	4.0661	4.43151	5.07499	2.79788	4.79423	4.10765	5.53736	8.9774	5.18645	2.66097	9.86956	4.97678	2.96002	6.72908	4.06546	3.69776	3.5072
chr19_57955966_57956201	3.39886	5.03928	6.21585	8.26102	10.6303	5.46592	7.77942	4.53587	5.12073	5.52936	4.58326	9.32354	6.15435	3.91091	15.3094	5.92149	3.68483	4.41934	4.33528	5.08262	4.43151	1.69166	5.59577	3.83538	6.16147	7.75231	1.99498	3.45763	7.09591	10.8565	4.97678	6.66004	2.5234	4.06546	5.54664	8.18347
chr19_58090314_58090514	21.5261	13.1021	4.43989	9.08712	7.0869	6.37691	8.75184	6.35022	10.2415	3.68624	5.49991	9.32354	8.6161	8.79954	11.0568	8.88223	7.36966	8.83869	2.16764	7.11567	1.10788	5.07499	9.32628	11.5062	10.2691	11.0747	7.97991	8.64408	10.6439	3.94782	10.783	5.92004	14.2993	8.94402	10.1688	5.84534
[truncated: 1,560 more rows]
