# Supplementary material for: Convergent organization of aberrant MYB complex controls oncogenic gene expression in acute myeloid leukemia
Source: eLife. 2021 Feb 2;10:e65905. doi: 10.7554/eLife.65905 (PMC7886351; doi:10.7554/eLife.65905)
Supplement: Supplementary file 1. — 1a. Peptide list. List of retro-inverso peptides with extinction coefficients. 1b. AML Cell line sequencing. Mutational landscape of human AML cell lines determined by whole genome sequencing 1 c. sgRNA sequence list. [file elife-65905-supp1.xlsx]

## Sheet: Supplementary_file_1a
Peptide	Sequence	Extinction Coefficient (M-1cm-1)
MYBMIM	[Ac]-KLENETSMLLLELEKIRKGGRRRQRRKKRGY-[NH2]	1490
CREBMIM	[Ac]-GPADSSLDNLIKRYpSPRRSLIERRGGRRRQRRKKRGY-[NH2]	2980
CRYBMIM	[Ac]-KLENETSMLLLELKRYpSPRRSLIERRGGRRRQRRKKRGY-[NH2]	2980
CG3	[Ac]-KLGNETSMGLLELKRYGPRRSLIERRGGRRRQRRKKRGY-[NH2]	2980
TG3	[Ac]-KLGNETSMGLLELEKIGKGGRRRQRRKKRGY-[NH2]	1490
MLLMIM	[Ac]-TNKLVFDMIDSPLINGGRRRQRRKKRGY-[NH2]	1490
Bio-CREBMIM	[Ac]-GPADSSLDNLIKRYpSPRRSLIERRGGRRRQRRKKRGY-[K-Biotin]-[NH2]	2980
Bio-CRYBMIM	[Ac]-KLENETSMLLLELKRYpSPRRSLIERRGGRRRQRRKKRGY-[K-Biotin]-[NH2]	2980
FITC-CREBMIM	[Ac]-GPADSSLDNLIKRYpSPRRSLIERRGGRRRQRRKKRGY-[K-FITC]-[NH2]	75000 (FITC)
FITC-CRYBMIM	[Ac]-KLENETSMLLLELKRYpSPRRSLIERRGGRRRQRRKKRGY-[K-FITC]-[NH2]	75000 (FITC)
RI-TAT	[Ac]-RRRQRRKKRGY	1490

## Sheet: Supplementary_file_1b
AML cell line	KNOWN SOMATIC SHORT-VARIANTS (PERCENT-READS,COVERAGE)	LIKELY SOMATIC SHORT-VARIANTS (PERCENT-READS, COVERAGE)	HIGH-LEVEL (CN>8) AND FOCAL (CN>5) AMPLIFICATIONS OF GENES KNOWN TO BE RECURRENTLY AMPLIFIED IN CANCER (COPY-NUMBER,EXONS)	HOMOZYGOUS DELETIONS OF GENES KNOWN TO BE RECURRENTLY DELETED IN CANCER (0,EXONS)	KNOWN FUNCTIONAL REARRANGEMENTS (e.g., GENE FUSIONS) (GENE1_GENE2_GENOMIC EVENT DESCRIPTION_SUPPORTING-READS)	LIKELY FUNCTIONAL REARRANGEMENTS (e.g., GENE FUSIONS) (GENE1_GENE2_GENOMIC EVENT DESCRIPTION_SUPPORTING-READS)
HL-60	NRAS_c.182A>T_p.Q61L(0.49,308),CDKN2A_c.238C>T_p.R80*(1.0,223)	TLL2_c.661C>T_p.R221*(0.52,434)	MYC_amplification(23,5 of 5)	TP53_loss(0,14 of 14)
Kasumi-1	ASXL1_c.1934_1935insG_p.G646fs*12(0.35,555),TP53_c.743G>A_p.R248Q(1.0,320),KIT_c.2466T>A_p.N822K(0.82,1215),CDKN2A_c.172C>T_p.R58*(1.0,273)	SMARCA4_c.4109_4109delG_p.G1370fs*14(0.52,628),NCOR1_c.6011-1G>T_p.splice site 6011-1G>T(1.0,194),CREBBP_c.1676+1_1676+10del10_p.splice site 1676+1_1676+10del10(0.99,186)	KIT_amplification(12,21 of 21),KDR_amplification(12,30 of 30),PDGFRA_amplification(12,22 of 22)
THP1	NRAS_c.35G>A_p.G12D(0.72,845)	TP53_c.518_543delTGAGGCGCTGCCCCCACCATGAGCGC_p.R174fs*3(0.96,337)	MYCL1_amplification(25,5 of 5)	CDKN2A_loss(0,5 of 5),PTEN_loss(0,6 of 9),CDKN2B_loss(0,5 of 5)	KMT2A_MLLT3_fusion_525	KMT2A_SNAPC3_rearrangement_230
OCI-AML2	DNMT3A_c.1903C>T_p.R635W(1.0,521),TP53_c.659A>G_p.Y220C(0.01,592),FLT3_c.2039C>T_p.A680V(0.49,449)	SPEN_c.4798A>T_p.K1600*(0.5,581),SPEN_c.8675_8676delCA_p.T2892fs*2(0.49,804),ZRSR2_c.1343_1344insGAGCCG_p.R448_R449insSR(0.49,267)
MV411	POT1_c.115A>G_p.K39E(0.37,394)	FLT3_c.1771_1772insACGTTGATTTCAGAGAATATGAATATGATC_p.Y591_V592insVDFREYEYDH(0.56,947)			KMT2A_AFF1_fusion_2799
MOLM13		FLT3_c.1774_1775insTTGATTTCAGAGAATATGAAT_p.V592_D593insDFREYEF(0.49,942)		CDKN2A_loss(0,5 of 5),CDKN2B_loss(0,5 of 5)	MLL_MLLT3_fusion_78
HEL	JAK2_c.1849G>T_p.V617F(1.0,1448),TP53_c.398T>A_p.M133K(1.0,400)	PASK_c.3909_3910insG_p.E1305fs*4(0.61,456)	CD274_amplification(9,7 of 7),PDCD1LG2_amplification(15,6 of 6),JAK2_amplification(15,23 of 23)	CDKN2A_loss(0,5 of 5),CDKN2B_loss(0,5 of 5)		KEAP1_NOTCH3_rearrangement_603
K562	TP53_c.404_405insC_p.Q136fs*13(0.91,386)	ASXL1_c.1773C>A_p.Y591*(0.33,593)	MAPK1_amplification(19,8 of 8),CRKL_amplification(16,5 of 5)	CDKN2A_loss(0,5 of 5),CDKN2B_loss(0,5 of 5)	BCR_ABL1_fusion_1295
U937	WT1_c.1105C>T_p.R369*(0.53,204),PTPN11_c.178G>C_p.G60R(0.53,319),JAK3_c.1533G>A_p.M511I(0.66,486)	MAP3K6_c.1731_1736+5del11_p.splice site 1731_1736+5del11(0.27,753),PTEN_c.389_390insCCCG_p.T131fs*50(0.86,165),TP53_c.559+1G>A_p.splice site 559+1G>A(1.0,432)		HDAC4_loss(0,2 of 26)		ETV6_ETV6_deletion_62
NB-4	FGFR3_c.746C>T_p.S249F(0.39,1063),TP53_c.743G>A_p.R248Q(1.0,427)	KRAS_c.53C>A_p.A18D(0.74,918)	CD274_amplification(7,7 of 7),KDM4C_amplification(7,25 of 25),KRAS_amplification(7,5 of 5),MYC_amplification(13,5 of 5),PDCD1LG2_amplification(7,6 of 6)	CDKN2A_loss(0,5 of 5),CDKN2B_loss(0,5 of 5)	RARA_PML_fusion_287
OCI-AML3	NRAS_c.182A>T_p.Q61L(1.0,361),NPM1_c.863_864insTCTG_p.W288fs*10+(0.38,245),DNMT3A_c.2644C>T_p.R882C(0.46,482)					ETV6_ETV6_truncation_159
SKM1	KRAS_c.351A>C_p.K117N,TP53_c.743G>A_p.R248Q,TET2_c.4253_4254insTT_p.P1419fs*30,STAG2_c775C>T_p.R259*,SPTAN1_c.351A>C_p.Q959*,EZH2_c.1937A>G_p.Y646C,BCOR_c4977-1G>A_p?,ASXL1_c.1773C>A_pY591*
a (Brown et al., 2017) , b (van der Meer et al., 2019)

## Sheet: Supplementary file 1c
sgRNA lists
target	sgRNA sequences	Backbone
sgCBP-1	CATGGTAAACGGCTGTGCGG	LRC2.1
sgCBP-2	ACAGAGCTTTGGTTCGATAT	LRC2.1
sgEP300-1	AAGAGGGCTTTGGTTCGGTA	LRG2.1
sgEP300-2	ACCCAAGCCCAAGCGACTGC	LRG2.1
sgCDK1	ACACAATCCCCTGTAGGATT	LRC2.1
sgNEG1	AGTCGCTTCTCGATTATGGG	LRC2.1
sgNEG2	CAGAGTCTCCTATGCCACAC	LRC2.1
