# Supplementary material for: Convergent organization of aberrant MYB complex controls oncogenic gene expression in acute myeloid leukemia
Source: eLife. 2021 Feb 2;10:e65905. doi: 10.7554/eLife.65905 (PMC7886351; doi:10.7554/eLife.65905)
Supplement: Supplementary file 2. — 2a. MYBMIM GeCKO CRISPR screen gene summary. Top 50 genes are shown. The complete tables are listed in Figure 1—source data 1 and Zenodo (DOI:10.5281/zenodo.4321824) 2b-e. Differentially expressed genes measured by RNA-seq in CRYBMIM, CREBMIM vs PBS-treated MV411 cells (1 hr and 4 hr). Top 50 differentially expressed genes in response to CRYBMIM are shown. The complete tables are listed in Figure 5—source data 1 and Zenodo (DOI:10.5281/zenodo.4321824). 2 f. Gene set enrichment analysis (GSEA) for differentially expressed genes measured by RNA-seq in CRYBMIM, CREBMIM vs PBS-treated MV411 cells. Summary of GSEA on CRYBMIM-induced differentially expressed genes are shown. The complete tables are listed in Zenodo (DOI:10.5281/zenodo.4321824). [file elife-65905-supp2.xlsx]

## Sheet: Supplementary_file_2a
Genome-wide CRISPR screen, Top 50 genes
MYBMIM_screen					PBS_screen
Gene	pos|p-value	pos|rank	pos|lfc		Gene	pos|p-value	pos|rank	pos|lfc
KCNN4	2.39e-07	1	2.7958		PTPN1	2.39e-07	1	1.2392
CREBBP	2.39e-07	2	1.9854		TP53	7.17e-07	2	1.0734
PTPN2	3.59e-06	3	1.8832		MGA	2.15e-06	3	0.98114
AMBRA1	7.41e-06	4	1.7169		DNAJB11	1.17e-05	4	0.93521
SMS	9.81e-06	5	1.1936		hsa-mir-1827	8.73e-05	5	0.91493
BIRC6	9.81e-06	6	0.88		XPC	0.00014038	6	0.24223
CHD1	1.12e-05	7	1.0958		CCNJ	0.00014325	7	0.64224
NFIL3	3.8e-05	8	0.98372		UAP1	0.00019874	8	0.58614
PHLPP1	3.95e-05	9	1.2172		ARMCX5	0.00019922	9	0.73449
MGA	3.95e-05	10	1.5143		hsa-mir-34a	0.00016382	10	0.67648
UAP1	4.71e-05	11	1.6376		PTPN2	0.00024035	11	0.7601
PCGF1	5.14e-05	12	1.6905		SLC16A1	0.00028435	12	0.54394
RELT	5.19e-05	13	1.0644		NFIL3	0.00030397	13	0.60878
INO80D	5.57e-05	14	1.4509		ZDHHC12	0.00039221	14	0.4177
ARL15	9.59e-05	15	0.97843		FAM132A	0.0004025	15	0.38165
SLC30A1	0.00010882	16	1.2352		ADI1	0.00041493	16	0.75134
ZNF229	0.00012221	17	1.1386		UACA	0.00043933	17	0.45495
TIMM17A	0.00012364	18	1.3526		SHROOM3	0.00044124	18	0.80045
EIF1	0.00013201	19	1.3047		TIMD4	0.00046946	19	0.62418
RABGAP1L	0.00013369	20	0.83592		KIAA0195	0.00050677	20	0.76208
TP53	0.00013943	21	1.3915		TARP	0.00055603	21	1.0652
SETD5	0.00014038	22	-0.19588		CT45A1	0.00060769	22	0.42733
hsa-mir-3618	0.00011934	23	1.4205		SPNS3	0.00061247	23	0.05533
ST3GAL4	0.00017865	24	1.1579		CKAP4	0.00063352	24	0.76216
C16orf13	0.00018487	25	1.0301		LYSMD1	0.00063974	25	0.73621
hsa-mir-7847	0.00014517	26	1.3808		ZNF280C	0.00067465	26	0.17303
KCNJ1	0.00025757	27	1.2035		hsa-mir-153-2	0.00041111	27	1.178
NXPH3	0.00030157	28	0.598		USP34	0.00081671	28	0.48443
TPST2	0.00037332	29	1.5178		COL5A2	0.00083728	29	0.52643
TRAF4	0.00037906	30	0.7263		ACCSL	0.0009382	30	0.74549
hsa-mir-4772	0.00029536	31	1.6698		OR8I2	0.0009382	31	0.57063
DNAJC4	0.00039197	32	0.33493		PGA3	0.00095829	32	-0.27573
CELA3A	0.00039676	33	0.84509		SOX9	0.0010286	33	0.76598
ACOX3	0.00040967	34	1.0004		RAB39B	0.0010401	34	0.69226
hsa-mir-4425	0.00033314	35	1.734		TGOLN2	0.0010444	35	0.61625
PTPN1	0.00051586	36	0.86338		OR1L6	0.0010951	36	0.564
CMIP	0.00055747	37	1.0779		PRSS58	0.0011037	37	0.90621
CYP1A2	0.00056417	38	0.82599		MIEF2	0.0011147	38	0.73374
PPP1CC	0.00059047	39	1.0527		G3BP1	0.001131	39	0.57001
hsa-mir-3117	0.00046229	40	1.0383		CNOT6L	0.0011501	40	0.80833
LMTK2	0.00066796	41	0.88064		KANSL1L	0.0012037	41	0.59862
TEF	0.00075358	42	0.92864		C9orf173	0.0012151	42	0.21497
hsa-mir-8057	0.00061104	43	1.7268		C16orf90	0.0012338	43	0.65568
TRAPPC12	0.00095805	44	0.67135		C2orf83	0.0012362	44	0.61677
hsa-mir-6715a	0.00074401	45	0.95884		DNTT	0.0012453	45	0.45802
JAZF1	0.0011185	46	0.26376		LY6G6C	0.0012467	46	0.62337
IHH	0.0012137	47	0.82319		TAF9	0.0012845	47	0.73973
KDM6A	0.0012147	48	0.71666		CDKN1B	0.0013032	48	0.41039
GALNT5	0.0014801	49	0.1218		PCDP1	0.0013065	49	0.47898
UGCG	0.0015332	50	1.1731		hsa-mir-4473	0.00094562	50	0.67532

## Sheet: 2b
RNA-seq, CRYBMIM vs PBS, 1hr (MV411), Top 50 genes
downregulated				upregulated
Gene	log2FC	-log(adjp)		Gene	log2FC	-log(adjp)
FAM46B	-2.20348	16.9567		RP11-489E7.4	5.60845	5.64418
SOCS1	-2.02275	9.14746		DUSP1	5.54536	277.467
HES1	-2.01345	6.95917		IL8	5.42161	277.467
PRDM1	-1.99242	19.2517		EGR2	4.92257	189.414
CTB-31O20.8	-1.95127	3.74418		RNU4ATAC	4.91021	3.16103
MIR3176	-1.93874	1.88986		CCL4	4.75927	60.2267
RP3-402G11.28	-1.91717	3.98353		FOS	4.68262	277.467
MASP2	-1.84282	11.9428		HCAR3	4.42724	19.2194
ID2	-1.74347	143.962		JUN	4.32795	277.467
FAM212A	-1.65743	5.39665		RGS2	4.15465	72.1048
RP11-498C9.12	-1.64277	3.69556		RP11-61L19.2	3.88769	8.75014
HPS6	-1.52456	52.8337		HCAR2	3.79402	50.3233
KLF10	-1.49968	126.04		EGR1	3.7452	277.467
C15orf39	-1.45215	19.5911		RNU1-60P	3.65544	1.69324
RP11-1212A22.1	-1.44973	2.66225		RPL29P14	3.33861	2.75739
RIMBP3	-1.44047	2.28934		SGK1	3.19977	47.511
PDXP	-1.40663	1.94168		PTGS2	3.12966	21.1197
MIR22HG	-1.40224	10.0524		RP6-99M1.3	3.03477	4.1518
ADM5	-1.37796	6.49702		PMAIP1	2.97362	277.467
ZBTB9	-1.37073	45.8773		RP11-160H22.3	2.87836	1.89557
PSMD6-AS2	-1.36474	3.10526		SOCS3	2.86374	277.467
SLC34A3	-1.36242	2.30828		TRIB1	2.72978	277.467
DBF4P1	-1.36002	1.72835		FOSB	2.71182	277.467
RP11-448G15.3	-1.34981	3.74472		SERPINE1	2.63716	277.467
HES4	-1.34103	1.42687		KLF6	2.56171	277.467
CAMKV	-1.33304	11.0252		CCDC173	2.47886	21.5171
RELL1	-1.3225	12.2621		SNORD14E	2.44417	5.49171
ACTL10	-1.27669	3.28065		RP11-386I14.4	2.39342	10.9355
ZNF296	-1.25263	3.90481		NR4A2	2.28659	277.467
MYC	-1.23491	75.9592		ATF3	2.23764	199.877
ZNHIT2	-1.21992	4.83054		RGS1	2.2118	9.34149
CTC-429L19.3	-1.21483	1.77498		HIST1H2BE	2.17623	2.96881
CTB-31O20.4	-1.20967	6.25575		EGR3	2.15651	277.467
RP5-997D16.2	-1.20243	2.57693		KLF4	2.08795	158.991
RPUSD2	-1.19288	28.7174		RP11-16E23.4	2.06829	1.48716
MIR142	-1.19067	11.5329		CCL3	2.01903	34.8116
RTN4R	-1.18612	1.47846		CTD-2313J17.1	1.99739	1.54872
RP11-1055B8.4	-1.1825	2.36791		PNRC1	1.97148	209.907
ZNF469	-1.18073	11.2089		TSC22D3	1.95188	277.467
AC009133.14	-1.17044	2.83407		PPP1R15A	1.87479	277.467
CTD-2517M14.5	-1.16585	1.34976		DFNB31	1.81936	1.81118
PARS2	-1.15252	12.129		HIST1H2BM	1.81881	1.96532
AP001053.11	-1.14611	3.9783		CSRNP1	1.81468	101.068
AC144831.1	-1.1451	1.4711		RP11-665G4.1	1.76331	3.86083
FOXO6	-1.14409	1.82654		CHMP4BP1	1.75462	2.33494
PRDM13	-1.13314	1.3034		ZFP36	1.7286	77.2881
AC069278.4	-1.12855	2.97781		CD83	1.66925	143.611
RP11-958N24.2	-1.12366	1.60575		MIR24-2	1.63858	129.316
GPM6B	-1.116	2.68787		CLK1	1.63109	157.519
SHH	-1.11551	1.41257		KLF2	1.62346	30.8221

## Sheet: 2c
RNA-seq, CRYBMIM vs PBS, 4hr (MV411), Top 50 genes
downregulated				upregulated
Gene	log2FC	-log(adjp)		Gene	log2FC	-log(adjp)
HRH4	-4.88702	3.23592		HCAR3	11.2304	26.1453
AC105344.2	-4.20677	1.84811		HCAR2	11.0055	49.8322
CHST3	-4.18166	1.54526		RRAD	11.0002	24.6947
AC105020.1	-3.98594	1.90857		RP11-489E7.4	10.4069	16.3896
CTD-3064M3.4	-3.76428	1.75579		FOSB	10.0106	304.97
RTN4RL1	-3.68598	2.45824		PTGS2	9.93511	247.102
SDC1	-3.62645	1.63482		RGS2	9.74272	229.812
RNU6-195P	-3.60341	1.47654		SERPINE1	9.68498	304.97
RP11-431J24.2	-3.48473	1.34073		RASGEF1B	9.66351	19.3068
TLR3	-3.33176	1.57952		IL8	9.64937	304.97
ALG1L8P	-3.32524	1.46234		MMP10	9.39058	26.8881
GPR88	-3.31013	23.0593		CCL4	9.28691	77.9616
RP11-831H9.3	-3.24143	1.35884		SGK1	9.19514	304.97
TMED10P2	-3.23014	1.39659		EGR2	9.07603	156.822
MCCC1-AS1	-3.13799	1.30974		RGCC	8.77459	297.686
MIR106B	-3.0698	1.63892		XIRP1	8.5908	11.1516
PRR15L	-3.04878	1.5768		MMP1	8.54118	10.2825
RP11-1293J14.1	-3.02044	1.54897		GEM	8.49046	71.0059
MESP1	-2.99314	2.20421		NEU4	8.33452	9.41006
SIX2	-2.89942	1.43318		RP11-158I3.3	8.33347	9.5684
CHST4	-2.87517	2.52465		SNORD3B-2	8.30215	9.59029
RP11-187C18.3	-2.81572	3.25468		RPL29P14	8.14386	19.4068
RPL7AP64	-2.66859	1.66345		RP11-160H22.3	8.1174	9.7946
CX3CR1	-2.58674	33.809		DUSP1	8.09973	304.97
FBXL22	-2.56013	3.09034		RNU2-61P	7.8847	8.3952
DDN	-2.5407	46.2003		RP11-293M10.2	7.78976	7.89713
TMEM200A	-2.52429	1.42846		ZCCHC12	7.77547	7.88466
RP11-549B18.1	-2.5045	4.12087		RP11-16E23.4	7.76599	11.896
KCNK13	-2.45029	4.33954		NEUROD4	7.73577	7.97508
Z83851.4	-2.44656	1.48091		JUN	7.61127	304.97
GPR27	-2.43605	1.95238		RP11-211G3.2	7.58186	7.34389
RP11-359J14.2	-2.42943	1.43049		TET2-AS1	7.53258	7.27371
RTN4R	-2.42765	6.34816		AC073934.6	7.44964	6.92192
P2RY2	-2.41498	214.713		RP11-864I4.3	7.44964	6.86327
RP11-259N19.1	-2.40232	14.0387		RNU5A-1	7.43607	6.93741
TMEM121	-2.36696	2.20066		GPRC5A	7.42845	7.20958
AC078942.1	-2.35884	1.72145		OTUD1	7.404	304.97
TLCD1	-2.35349	25.5247		RNU4ATAC	7.35444	10.6339
TRIM58	-2.31862	5.03997		NR4A2	7.3402	304.97
RP11-800A3.4	-2.3043	288.626		RND3	7.31688	10.3765
ANKRD55	-2.29837	7.25254		DFNB31	7.31601	34.4258
SERF1B	-2.2963	1.64608		RNVU1-18	7.28752	6.52352
PRR19	-2.29084	5.11183		MIR3687	7.17199	7.2873
PDF	-2.26507	2.12315		CXCL2	7.15453	14.7278
APLN	-2.24706	12.0494		SLC44A4	7.11889	7.03584
POMGNT2	-2.24265	29.4884		RNU1-60P	7.05412	14.049
CXCR2	-2.23234	47.9727		CXCL3	7.0321	5.55373
KIAA1161	-2.20533	4.61492		GCNT1P3	7.02355	6.23334
CBX2	-2.18339	84.9758		MUC5AC	7.00563	5.39972
ZNF114	-2.17063	30.5568		CCL3	7.00359	83.8403

## Sheet: 2d
RNA-seq, CREBMIM vs PBS, 1hr (MV411), Top 50 genes
downregulated				upregulated
Gene	log2FC	-log(adjp)		Gene	log2FC	-log(adjp)
-	-	-		FOS	1.35975	108.974
				RMRP	1.07723	3.70917
				EGR1	0.883087	28.3128
				RN7SK	0.835774	5.79413
				DUSP1	0.741661	7.63787

## Sheet: 2e
RNA-seq, CREBMIM vs PBS, 4hr (MV411), Top 50 genes
downregulated				upregulated
Gene	log2FC	-log(adjp)		Gene	log2FC	-log(adjp)
-	-	-		EGR1	1.15812	36.0627
				FOS	0.611195	16.9002

## Sheet: 2f
RNA-seq, GSEA
1 HOUR CRYBMIM
Up-regulated	NES	FDR q-val
HALLMARK_TNFA_SIGNALING_VIA_NFKB	2.80247	0
GSE9988_ANTI_TREM1_VS_CTRL_TREATED_MONOCYTES_UP	2.53097	0
GSE9988_LPS_VS_VEHICLE_TREATED_MONOCYTE_UP	2.47259	0
PID_AP1_PATHWAY	2.42064	0
HESS_TARGETS_OF_HOXA9_AND_MEIS1_DN	2.38658	0
MORF_JUND	2.32079	1.78063e-05
PID_ATF2_PATHWAY	2.30891	3.42758e-05
GO_CHROMATIN_SILENCING	2.27876	7.47649e-05
GNF2_FOS	2.24531	0.000170467
GO_NEGATIVE_REGULATION_OF_GENE_EXPRESSION_EPIGENETIC	2.17196	0.000647611
REACTOME_ACTIVATION_OF_THE_AP1_FAMILY_OF_TRANSCRIPTION_FACTORS	2.03864	0.00455826
WANG_LSD1_TARGETS_DN	2.00965	0.00650276
ONO_AML1_TARGETS_UP	1.98747	0.00869785
TAVOR_CEBPA_TARGETS_UP	1.97626	0.00981913
GERY_CEBP_TARGETS	1.97477	0.0100051
BIOCARTA_ETS_PATHWAY	1.95104	0.0129956
PID_P53_DOWNSTREAM_PATHWAY	1.91547	0.018464
HALMOS_CEBPA_TARGETS_UP	1.89361	0.0223967
Down-regulated	NES	FDR q-val
MYB_Q6	-1.62795	0.402704
4 HOUR CRYBMIM
Up-regulated	NES	FDR q-val
HALLMARK_TNFA_SIGNALING_VIA_NFKB	2.66726	0
GSE9988_ANTI_TREM1_AND_LPS_VS_CTRL_TREATED_MONOCYTES_UP	2.58618	0
GSE9988_LPS_VS_VEHICLE_TREATED_MONOCYTE_UP	2.56132	0
HALMOS_CEBPA_TARGETS_UP	2.29745	0
GO_MONOCYTE_CHEMOTAXIS	2.23371	0
GO_GRANULOCYTE_MIGRATION	2.22332	0
GO_LEUKOCYTE_CHEMOTAXIS	2.2228	0
PID_AP1_PATHWAY	2.20881	0
DASU_IL6_SIGNALING_UP	2.20574	0
HESS_TARGETS_OF_HOXA9_AND_MEIS1_DN	2.19678	0
GO_MYELOID_LEUKOCYTE_MIGRATION	2.19607	0
GO_CHROMATIN_SILENCING	2.17619	0
GERY_CEBP_TARGETS	2.15152	0
ONO_AML1_TARGETS_UP	2.04207	3.16315e-05
HALLMARK_APOPTOSIS	2.01646	9.41189e-05
HALLMARK_P53_PATHWAY	1.95411	0.000419771
MORF_JUND	1.95323	0.000424438
BIOCARTA_ETS_PATHWAY	1.91007	0.00106343
GNF2_FOS	1.9015	0.00122554
Down-regulated	NES	FDR q-val
HALLMARK_E2F_TARGETS	-2.73191	0
HALLMARK_MYC_TARGETS_V2	-2.36755	6.23917e-05
SCHUHMACHER_MYC_TARGETS_UP	-2.22554	0.000327752
KAMMINGA_EZH2_TARGETS	-2.0196	0.00488289
IVANOVA_HEMATOPOIESIS_INTERMEDIATE_PROGENITOR	-1.91721	0.0131332
