# Supplementary material for: Convergent organization of aberrant MYB complex controls oncogenic gene expression in acute myeloid leukemia
Source: eLife. 2021 Feb 2;10:e65905. doi: 10.7554/eLife.65905 (PMC7886351; doi:10.7554/eLife.65905)
Supplement: Supplementary file 3. — 3a. Protein lists identified by IP-MS of MYB and CBP complex purification from MV411 cell nuclei. Summary of identified proteins is shown. The complete tables are listed in Figure 7—source data 1 and Zenodo (DOI:10.5281/zenodo.4321824). 3b. MYB complex functional groups. 3 c. Pathway analysis for 9 clusters of transcription factor-remodeled genes in response to CRYBMIM measured by ChIP-seq. Top 20 pathways in each cluster are shown. The complete tables are listed in Zenodo (DOI:10.5281/zenodo.4321824). [file elife-65905-supp3.xlsx]

## Sheet: Supplementary_file_3a
MYB IP-MS protein lists	CBP IP-MS protein lists
RBMX	TRA2B
ACIN1	RPL3
MYO1G	THRAP3
SRSF7	SRRM2
SRSF2	SRSF6
CBFB	SRSF7
SRRM2	RPL5
MYB	DDX17
SRSF5	SRSF9
SRSF1	SRRM1
SRSF6	RBMX
SRSF10	RPL4
RPL21	SRSF10
RPL26	RPL7
PGAM5	RPL17
ARHGEF6	RPL21
TRA2B	RPL13
TCF3	RPL6
GIT2	SRSF5
SRRM1	RPS11
THRAP3	RPL15
RPA1	RPL26
TFAM	RPL18
SRSF9	CREBBP
EIF4A3	HNRNPU
BCLAF1	PNN
NCBP1	RPL31
PML	SAP18
WTAP	RPL10A
ZC3H18	RPL14
XRCC1	MYH9
MTA2	RPL18A
RPL37A	PRPF19
RPL3	RPL37A
RFC4	RPL27
SSBP1	RPL32
RFC2	WTAP
TRA2A	ERH
RBBP4	RPL7A
RFC3	RPL10
RPA2	CKAP5
RPL10	RPL35
RPL18A	EIF4A3
DDX17	RPL8
ARHGEF7	RPL28
RALY	RPS9
SNRPD3	RPL29
RFC5	LACTB
RPL30	RPL34
SSBP3	RPL22
SKIV2L2	RPL36
RPL9	RPL35A
TCF12	DDX21
XAB2	TRA2A
CTBP1	MYL12A;MYL12B;MYL9
SNRNP40	ACIN1
MYH9	SNRNP40
RPL13A	MAGOHB
HOXA10	RPL9
LMO2	RPS19
LDB1	CDC5L
RBM8A	RPS2
ATF2	MYL6
LIG3	RPSA
NELFB	RPS18
U2SURP	BCLAF1
NO66	SNRPD3
DDX5	THOC1
SNRNP200	SRSF4
SRSF4	RPL30
PLRG1	ZC3H18
HNRNPUL1	RNPS1
CREB1	ZC3H13
SNRPA	SNRNP200
CBFB	SRRT
NMNAT1	THOC2
VRK3	RPL19
RPL10A	PLRG1
PBX3	SRSF3
THOC6	RBM8A
THOC2	SRSF1
KDM1A	NMNAT1
CHTOP	YEATS2
SLC12A4	PHGDH
SNRPA1	CHTOP
GIT1	LCP1
ZCCHC8	RPS12
LACTB	CRNKL1
PRPF6	RPLP1
CLTC	THOC6
THOC1	RPL23A
SRSF3	PHF5A
CLK3	NCBP1
HDAC1	DDX5
SATB2	RPS5
ARPC4	YBX1
NELFA	RALY
RCOR1	HSP90AB1
RNPS1	NO66
RPA3	RPS23
NCBP2	RSL1D1
HAX1	AQR
CLK2	CLK3
LUC7L2	RPLP0;RPLP0P6
CAPZB	PRPF40A
SATB1	TOP1
SMU1	FMR1
NELFE	RPS6
FMR1	U2AF2
TLN1	DDX18
SNRPE	RPS15A
SAP18	CTSG
SNRPD1	SNRPA1
CDC40	RPL39P5;RPL39
SRRT	CLK2
PPIL1	BCAS2
CBLL1	MBIP
ATAD3B	CDK11B;CDK11A
CTSG	CBLL1
HNRNPF	FXR2
GPATCH8	ALYREF
DDX39B	CAPZA1
SNW1	RPS7
CDK11B;CDK11A	RBM27
RPL17	PABPN1
U2AF2	HNRNPF
TECR	PRPF6
PCBP2;PCBP3	HIST2H3A;HIST3H3;H3F3A;HIST1H3A;H3F3C
MYO18A	SNRPD1
RUVBL1	SKIV2L2
NOP2	RPL36AL
RUVBL2	SNRPE
ISY1	SAP30BP
RBM22	NOP2
BANF1	PCBP1
RBM14	RPS25
SAP30BP	LUC7L2
BCAS2	CDC40
RPL27	MATR3
RPL34	FAU
ARPC1B	WDR5
TFCP2	TCOF1
SUN2	TAF15
SSFA2	THOC3
SLC25A11	SRP72
PRPF8	SNRPA
PNKP	YWHAE
DNAJC9	THOC5
DDX18	PPIL1
RPL36AL	U2SURP
FXR2	TUBB4B;TUBB4A
RPL4	SF3A2
RUNX2	RPS28
RBMXL1	ZC3H14
RPLP0;RPLP0P6	WIZ
PRPF19	MYBBP1A
FOSL2	SF3B2
DDX41	RBMXL1
RPL7	NOP56
SLC25A10	HP1BP3
IKZF1	NHP2L1
LYL1	ACTR3
NELFCD	NOP58
PPP1CA	SUN2
SLC25A1	RRBP1
WDR5	RPL27A
CSE1L	EBNA1BP2
MECP2	RPS14
PAK2	RNH1
PPIE	RPS17
RPL13	HNRNPR
DPM1	CLTC
NOP58	FXR1
DOCK8	RPS13
ILF2	DDX39B
CCDC12	DNAJC13
MAFG;MAFK	ISY1
NOP56	RPS8
CWC15	SRPK1
MYO1C	ACTN4
ERH	ARPC4
RBM7	HNRNPUL2
GATAD2B	ACTR2
ARPC5	RTCB
THOC5	RBM14
UBP1	RBM25
ATP5C1	RFC3
SRPK1	HNRNPD
BAG2	SLTM
SF3B4	YTHDC1
FXR1	SF3B1
MYBBP1A	LYAR
TAF15	THOC7
MRPS22	PPIE
DHX8	CCT3
SSBP2	CCT8
RPS11	TFAM
CWC22	ZZZ3
ATAD3A	RPS3
SNRPF	RPS24
VEZF1	HNRNPK
ARPC2	SNRPB2
ATF7	HNRNPC
AHSA1	NCBP2
MYO1F	RFC5
PHB	RFC2
PABPN1	SF3A3
EIF4A1	H1FX
ZC3H14	RPS4X
LYAR	SF3A1
HNRNPUL2	ZCCHC8
PHB2	PABPC1
RPL12	PTDSS1
MYL12A;MYL12B;MYL9	SON
SNRPB;SNRPN	SAFB
CCT7	RPA2
EBNA1BP2	RPL13A
YLPM1	CWC15
FERMT3	PRPF4B
SON	SF3B6
RPS3A	SYNCRIP
LUC7L3	EIF4A1
THOC7	SUGP2
PNN	ARHGAP1
H1FX	CCDC12
YWHAG	NOP16
HNRNPR	CBFB
HNRNPA1;HNRNPA1L2	DHX8
RPS15A	LUC7L3
P4HA1	SF3B4
QPCTL	KIAA0020
PPIG	SNRPF
SF3B6	U2AF1
DDX50	SF3B5
YTHDC1	TUBB;TUBB2B
THOC3	CCT4
SF3B2	DDX50
RPL32	RBM15
CACYBP	DHX30
PRPF4B	SRP68
DDX21	SDAD1
GFI1	PPP1CA
CRNKL1	ZNF830
PPP2R1A	DDX3X;DDX3Y
SAFB	RPS21
RPS7	TLN1
LONP1	PPIG
MRPS18B	SNRPD2
RPL11	CSRP2BP
ARPC3	RPL11
CCT6A	GPATCH8
RPS17	CWC22
JUND	RUVBL1
HNRNPK	CFAP20
RPL8	YWHAZ
DAP3	MRTO4
RBM15	ZCCHC3
CCT8	WBP11
RPL18	RPL12
NUP93	CCT2
POLB	EIF6
POLDIP3	NPM1
SF3A1	CSE1L
MRPS27	SLC25A11
MEIS1;MEIS2	MRPS22
WBP11	USP39
PUF60	YLPM1
XRCC6	C7orf50
RPL15	ARPC1B
SLTM	SRSF2
RPL31	GTPBP4
PPHLN1	POLDIP3
SRP72	CTNNBL1
DIAPH1	BRIX1
LEMD2	ILF2
SF3B5	BAG2
ZNF830	CWC27
RPL28	RPS20
RPL6	RBBP4
ATXN10	DNAJC9
SF3B1	DDX24
PTDSS1	RPA1
MRTO4	BUD31
ZEB2	HMGA1
SUGP2	HAX1
NUDC	BCLAF1
BUD31	ATAD3B
ARHGAP4	TECR
SF3A3	CCNK
RBM39	DKC1
SDE2	SRP14
EXOSC10	MFAP1
CLASRP	SF3B3
TCOF1	SSFA2
C1QBP	DHX16
RPS3	SLAIN2
BRIX1	HADHA
TMEM33	PLEC
PTCD3	MRPS27
RPL5	MYO1C
CFAP20	SNRPB;SNRPN
TAF9;TAF9B	MYO1F
ZNF326	FYTTD1
ARHGEF1	RRS1
RPL7A	RPS4Y1
CUX1	PHRF1
HDAC2	BUD13
MBD2	ZNF326
FAU	CAPG
CDC5L	KAT2A
MRPS2	RPS10
FIP1L1	RRP8
RPS9	PTCD3
PPIL3	FERMT3
RRS1	SNRNP70
CTNNBL1	MTDH
SEC61A1	CFL1
MRPS34	GPKOW
SSR1	TCP1
SYNCRIP	ARPC3
RBM27	RPS15
TOP2B	SNW1
PPIL2	RPL24
USP39	RBM34
ATF1	ARPC2
RPL36	PRMT1
BUD13	PAXBP1
ESYT2	PPIL2
RPL14	PRPF8
CCT3	SART1
CWC27	YWHAB
RBM34	RUVBL2
TIMM50	CCT7
ACTN1	SRP9
RFC1	CLASRP
CXXC5	DAP3
SKP1	FBL
SFXN3	PDCD6IP
DNAJC13	RPL23
CCT2	PHB2
SQRDL	CACTIN
CALR	PPHLN1
MAGOHB	SAMM50
CDK6	PRPF4
RUNX1	NHP2
RPL22	DIMT1
RBM25	ARHGEF1
SRSF8	KPNB1
HADHA	HSPA1A;HSPA1B
DHX16	TRIM28
RPL23A	AHSA1
TRRAP	TADA2A
CACTIN	HNRNPM
DNTTIP1	C14orf166
KPNB1	ILF3
DKC1	TBK1
CDK12	CCNL2
POLRMT	DOCK8
LRCH4	TFIP11
TMCO1	APOBEC3B
NUP35	CCDC9
PAXBP1	RPS3A
CCNK	FLNB
NHP2	FNBP4
XRCC5	RPS29
MRPS23	RPA3
KIAA0020	CCT6A
DYNC1H1	PTPN6
GPKOW	CDK12
THEM6	HNRNPDL
SAMHD1	FASN
HNRNPH1	RPS26;RPS26P11
DIMT1	POLRMT
YME1L1	CCT5
DHX30	IK
DGCR14	EXOSC10
TBK1	C11orf98
KDM2B	MRPS2
AIFM1	SSBP1
EPRS	PPIL3
SLU7	MYO1G
PRMT1	CHD1
U2AF1	MRPS18B
DHX15	LIG3
TFIP11	MRPS9
ZNF384	SAFB2
UBE2M	RPF2
SRP68	GFI1
FLOT1	RNF113A
FYTTD1	MRPS34
NUP205	HADHB
SF3B3	CCNL1
RPL35A	DHX15
JUNB	C9orf78
IMPDH2	RBM7
GTPBP4	DDX55
PHRF1	PRPF31
SART1	MRPS17
CEBPA	FIP1L1
PRPF4	HNRNPAB
MBD3	DIAPH1
LCP1	CCDC101
C7orf50	DDX23
CXorf56	CACYBP
TAF12	TBKBP1
PRPF31	C1QBP
PRPF40A	YWHAG
CEBPD	LONP1
PIK3AP1	ATXN2L
MRPS25	RFC1
MRPS15	MRPS25
RNF113A	HDAC1
ARHGAP17	LRCH4
MRPS28	DGCR14
EFTUD2	ATAD3A
ARHGAP1	MYADM
PRPF38A	DHX9
PTBP1	PML
HCLS1	RRP1
NOP10	IQGAP1
C9orf78	PGAM5
RPS2	SNIP1
HMHA1	SCAF11
MTA1	CXorf56
HACD3	TIMM50
CAND1	BANF1
SNRPD2	ACTN1
CTBP2	UBE2N
SPI1	PRPF38A
RPS4X	NUDC
APOBEC3B	SDCBP
DNM1L	RBM22
IK	ARHGAP4
NUP88	EFTUD2
VARS	HNRNPH1
SSR4	PPIA
RPS20	HSP90AA1
YKT6	PPWD1
RPS21	PUF60
MRPS26	ARPC5
EIF3L	NAT10
MRPS35	RBM28
RBM12B	RPS16
RBM17	RNPC3
RPS13	SMU1
RPN2	ATXN10
MRPS9	PPP2R1A
YWHAQ	HNRNPH2
CHD1	AKAP8
ARF4	SDE2
TUBB;TUBB2B	SLU7
NDUFA13	TMEM33
RPLP1	ARHGAP17
RPL24	XRCC6
RPF2	SQRDL
CAPZA1	ZFR
MRPS17	SFXN3
RRP8	MAP2K2
RANGAP1	PHB
RPL29	AP2B1;AP1B1
TRAP1	MRPS26
ACSL1	NUP93
DDX6	NIFK
SRP14	DYNC1H1
HNRNPM	NCL
PHGDH	SRPK2
ZC3H13	MRPS28
NDUFA4	VRK3
MRPS10	UBN2
DNAJA3	MRPS23
CBFA2T3	QPCTL
AP2A1	TAF9;TAF9B
PPIH	ARL6IP4
PPWD1	BCCIP
FNBP4	RRP12
RPL27A	FAM98A
ATP5O	AZU1
GMFG	P4HA1
DDX23	RPLP2
NCOA5	NCOA5
CCNL2	MRPS15
CORO1A	LARP1
H2AFY	MRPS35
RPS15	UBA52
ACTR3	PAK1IP1
CEBPB	FRG1
STK26;STK25	XRCC5
SUPT7L	RBBP6
SLC25A3	ILF3
KIAA1429	RBM4B
MRPS6	EXOSC3
AZU1	NKTR
SDAD1	PEO1
ZNF362	MRPS7
ILF3	XRN2
FLOT2	PPIH
HNRNPU	EDC4
BLM	SSR4
RPL23	AP2A1
SAFB2	ERLIN2
STXBP2	RAB11FIP1
RPL19	YWHAQ
ACTR2	LSM2
PYCR2	CYC1
RPS24	SNRPG;SNRPGP15
ARL6IP4	PAK2
RSL1D1	PFN1
PEO1	RBM12B
KPNA1;KPNA5	ZRANB2
ARHGEF2	BRI3BP
DLAT	FLOT1
MAP2K2	DNAJA3
RBM4B	MECP2
DDX24	YME1L1
PRPF3	TFCP2
RPS10	RPN2
RPS4Y1	PRPF3
HSP90AA1	HACD3
RBBP6	CAP1
EMD	EIF3L
RPS28	SEC61A1
FRG1	XAB2
USO1	PIK3AP1
AP2B1;AP1B1	IKZF1
UMPS	MRPS10
SNX2	LSM3
HNRNPDL	ARHGEF2
RPS14	CALM1
KAT2A	CAPZB
PPP1CC	SRSF8
OXSR1	PTBP1
RPS5	CHMP4B
RPS8	DNM1L
LYPLA1	MSH6
DDX1	SYF2
DDX55	TBL2
ZCCHC3	DDX1
APOBEC3C	ESYT2
PCBP1	DDX6
DDX19B;DDX19A	CTBP1
TAF10	RBM17
PPP1R9B	TOP2B
XPO1	SPI1
HNRNPC	MRPS11
LRPPRC	HSPA8
CCNL1	GNB2L1
HNRNPH2	RUNX2
RTCB	XRCC1
MRPL38	APOBEC3C
AIP	HMHA1
NOP16	HSP90AB2P
CEBPG	FUS
TUBA1B	ZNF766;ZNF765;ZNF789;ZNF30;ZNF695;ZNF195;ZNF56;ZNF333;ZNF679;ZNF506;ZNF735;ZNF610;ZNF713;ZNF486;ZNF701;ZNF141;ZNF718;ZNF716;ZNF253;ZNF888;ZNF320;ZNF286A;ZNF468;ZNF479;ZNF257;ZNF480;ZNF519;ZNF891;ZNF92;ZNF66;ZNF527;ZNF677;ZNF732;ZNF90;ZNF354A;ZNF354B;ZNF813;ZNF528;ZNF595;ZNF534;ZNF573;ZNF761;ZNF28;ZNF616;ZNF347;ZNF624;ZNF845;ZNF445;ZNF729
NUP62	GNL3
PFKL	NIP7
HADHB	SKP1
MRPS7	HSPA5
MRPS11	AIFM1
CCT4	KIAA1429
FBL	PCBP2;PCBP3
LSM2	RBM39
SLC25A5	H2AFY
RRP1	NKRF
SRPK2	LSM4
HNRNPA0	TADA3
ILF3	HSP90B1
AQR	TUBA1C
MYL6	XPO1
NAT10	C12orf43
LMNB2	CPSF1
DDOST	UBE2M
RNH1	THEM6
HSD17B11	KHDRBS1
DHX9	STXBP2
RPL39P5;RPL39	CLIC1
ELAVL1	DARS
RPS19	ATP5O
BRI3BP	ACTA1;ACTC1;ACTG2;ACTA2
IDH2	HCLS1
VASP	MRPS31
C17orf85	GNL2
SDCBP	SMNDC1
THAP11	DNTTIP1
TCP1	NOSIP
PSME3	SAMHD1
SNRPB2	STAU1
ZBTB7B	MRPL11
FEN1	ZNF638
SSR3	PRPF38B
PKN1	C17orf85
NUP85	HNRNPH3
SF3A2	CAND1
MAP2K1	GNAI2
COPB1	RRP1B
MYADM	RANGAP1
CCAR2	CLK4;CLK1
RPS23	EPRS
CAD	CALR
ACTA1;ACTC1;ACTG2;ACTA2	HNRNPUL1
ARPC5L	CDK6
ALYREF	DDX31
TBL2	KPNA1;KPNA5
TOMM22	UQCRQ
NHP2L1	THAP11
RBM28	RPL7L1
XRN2	MT-CO2
RPS16	TUBA1B
KEAP1	CMSS1
NKRF	RAC2;RAC1;RAC3
RPS18	SRBD1
HSPD1	MRPL38
PARP1	DDX41
TRIM27	KEAP1
VIM	ACTB
MAGT1	MNDA
SLC25A13	UMPS
HSP90AB1	TRMT10C
YARS	UTP23
SLC25A6;SLC25A4	NUP205
HAT1	TRMT1L
RPSA	ARF4
RPL7L1	AIP
SLC25A22	PRSS57
ARCN1	PFKL
RPS25	HNRNPA3
ZBTB7A	NUP35
TAF4	HSD17B11
LIN37	SNX2
DCTN2	SURF4
CREBBP	DPM1
MRPS33	CBFB
RPL35	SUPT7L
ITGAL	CPSF4
NUP54	MRPS33
DLST	PELP1
PTPN6	LRRC59
HMGA1	TRAM1
CPSF4	MED23
HP1BP3	ARF1;ARF3
PSMD3	PYCR2
TRMT10C	TAF4
MRPS31	DHX35
MT-CO2	HNRNPL
PDCD6IP	SLC25A10
MBOAT7	ARHGEF6
FUS	TOMM22
NUP155	CREB1
PYCARD	PPP1CC
ARGLU1	YKT6
PRPF38B	TUBA4A
ATP5J2	NKAP;NKAPL
CCT5	SLC25A22
MARS	NUDT21
CYC1	GMFG
UTP23	NUP62
TBC1D15	LGALS9
NKAP;NKAPL	TAF6
SEC13	CD3EAP
LMNB1	IMMT
ATP2A2;ATP2A1;ATP2A3	CHAMP1
CPT1A	HNRNPA2B1
EIF6	EXOSC8
NUP133	TRRAP
SURF4	MED16
RPS26;RPS26P11	HIST1H2AJ;HIST1H2AH;H2AFJ;HIST2H2AC;HIST1H2AC;HIST2H2AA3;HIST1H2AG;HIST3H2A;HIST1H2AD;HIST1H2AB;HIST1H2AA;H2AFX
ERLIN2	SLC25A1
PPP2CA;PPP2CB	ATF2
SNRNP70	HNRNPA0
ACTB	TMCO1
RPLP2	DDX19B;DDX19A
DHRS7B	EXOSC9
RAC2;RAC1;RAC3	SLC25A3
IPO4	RARS
RPS12	PTPN7
LRRC59	EWSR1
PSMD5	ELAVL1
LSM3	FKBP15
EEF1E1	KPNA2
RRBP1	RFX1
RCOR3	USO1
HSPA9	COPG1
TMOD3	CAD
HNRNPD	TIMM44
IMMT	DHRS7B
RPS6	GRWD1
HIST1H2BH;HIST2H2BF;HIST1H2BL;HIST1H2BM;HIST1H2BN;HIST1H2BC;HIST1H2BD;HIST1H2BK;H2BFS	ZC3H4
EIF3E	TXNL4A
MATR3	ATP5J2
ATP5B	TPM3
HSPA8	TMOD3
UBE2N	PAG1
CKAP5	IDH2
TBKBP1	MAP2K1
MTDH	COPB1
PELP1	SMARCC2
HSP90B1	P4HB
EXOSC7	AIMP2
TRAM1	HIST1H2BH;HIST2H2BF;HIST1H2BL;HIST1H2BM;HIST1H2BN;HIST1H2BC;HIST1H2BD;HIST1H2BK;H2BFS
YWHAB	SLC25A6;SLC25A4
TIMM44	GAR1
SRP9	IPO4
ESYT1	GIT2
HCFC1	CDK13
YBX1	ADAR
PABPC1	KDM1A
ACTN4	SATB2
CAP1	EEF1A1;EEF1A1P5
SAMM50	YARS
HIST1H1B	ZEB2
KHDRBS1	TOP2A
RRP12	HNRNPA1;HNRNPA1L2
DDX3X;DDX3Y	ZC3HAV1
CHCHD3	COIL
TUFM	FMR1
PDIA6	EHD1
SNRPG;SNRPGP15	RCOR1
PRKDC	VIM
CAPG	EIF3E
GAR1	DDOST
C14orf166	PSMD5
TUBA4A	MRPS5
HIST1H1C	EXOSC7
YWHAE	CHERP
PLEC	TEX10
TRIM28	STAU2
PES1	HIST1H1B
RPS27	ATP5C1
HNRNPAB	DLAT
FASN	G3BP1
HIST1H2AJ;HIST1H2AH;H2AFJ;HIST2H2AC;HIST1H2AC;HIST2H2AA3;HIST1H2AG;HIST3H2A;HIST1H2AD;HIST1H2AB;HIST1H2AA;H2AFX	ACTR1A
ANXA1	ABCD3
YWHAZ	HIST1H4A
HNRNPA3	IARS
TMPO	CWC25
HIST1H4A	IQGAP2
IQGAP1	EEF1E1
HNRNPA2B1	LSM5
TMPO	HSPD1
HIST2H3A;HIST3H3;H3F3A;HIST1H3A;H3F3C	ARHGEF7
EEF1A1;EEF1A1P5	RAVER1
GRN	ESYT1
CALM1	DDX39A
TRIM21	HIST1H1C
ATP5A1	VAT1
RPN1	MED24
H2AFV;H2AFZ	HIRA
TPM3	PGK1
PGK1	IMMT
NCL	SSR1
HSPA5	FLNA
HNRNPL	SUPT3H
TOP1	ITGAL
EEF2	HCFC1
CFL1	SLC25A5
FCGR1A;FCGR1B;FCGR1C	MED27
ARG1	PDIA3
VCL	IMPDH2
PHF5A	SSRP1
TGM1	SERBP1
XP32	EXOSC2
PKM	RPN1
CAT	TUFM
SPRR1B	ACSL1
SERPINB12	EIF3G
FLNB	RPS27
HSPA1A;HSPA1B	CNOT1
ANXA2;ANXA2P2	RBM42
VDAC2	PRKRA
UBA1	ENO1
VDAC3	EIF3A
P4HB	PKM
PIP	LMNB1
GSDMA	CHCHD3
PRDX2	HSPA9
GAPDH	CPSF2
SPRR2A;SPRR2B;SPRR2D;SPRR2E;SPRR2G	EEF2
SERBP1	SUPT20H
JUP	GPATCH1
LOR	ATP5B
GGCT	ELP3
LMNA	PIP
PKP1	H2AFV;H2AFZ
TGM3	ARGLU1
DSP	MTA2
DSG1	RPS27A;UBB;UBC
BLMH	S100A8
PRDX1	FCGR1A;FCGR1B;FCGR1C
PPIA	PRKDC
LYZ	RFC4
RPS27A;UBB;UBC	AZGP1
FLNA	LMNA
EEF1G	ATP5A1
SFPQ	LGALS7
NPM1	TMPO
AZGP1	VDAC2
CTSD	MINA
TFRC	BLMH
LTF	CAT
S100A8	S100A7;S100A7A
MDH2	CSTA
AMY1A;AMY2B;AMY2A	GAPDH
AHNAK	AHNAK
PDIA3	ANXA2;ANXA2P2
S100A9	VCL
EEF1B2	AMY1A;AMY2B;AMY2A
STMN1;STMN2	IGHG1
PRDX6	PRDX2
DSC1	S100A9
ASAH1	SERPINB3
DEFA3;DEFA1	SERPINB12
PKP3	KRT2
CSTA	ARG1
CRYAB	DSG1
SFN	SBSN
ENO1	DLST
IGHG1	KRT1
TMED3	KPRP
SERPINA12	DSC1
CASP14	DSP
SERPINB3	GRN
HSPE1	FABP5
S100A7;S100A7A	JUP
SBSN	LCN1;LCN1P1
EZR	CASP14
ECM1	TFRC
ALDOA	PKP1
LCN1;LCN1P1	KRTAP16-1
DSC3	A2M
IGKC	CTSD
FABP5	VDAC3
HSPB1	PRDX1
APOD	KRTAP10-1;KRTAP10-5;KRTAP10-7
SOD1	XP32
CALML5
IGHA1;IGHA2
CDSN
IGLC6;IGLC7
LGALS7

## Sheet: Supplemental_file_3b
Chromatin-related	RNA-related (including splicing)	DNA-related (replication, repair, etc)	Ribosomal-related	Mitochondrial	Other/Misc/Unknown
CBFB	ACIN1	RPA1	RPL26	MRPS22	ZC3H18
MYB	SRSF7	RFC2	RPL37A	PHB	MYH9
TCF3	SRSF2	RFC3	RPL3	PHB2	CAPZB
HOXA10	SRRM2	RPA2	RPL10	LONP1	DNAJC9
RCOR1	SRSF1	RFC5	RPL18A	MRPS18B	CSE1L
SAP18	SRRM1	LIG3	RPL30	DAP3	ARPC2
RUVBL1	EIF4A3	NELFB	RPL9	MRPS27	CCT7
RUVBL2	WTAP	SMU1	RPL13A	MRPS34	PPP2R1A
IKZF1	DDX17	PNKP	RPL10A	POLRMT	CCT6A
WDR5	SNRPD3	SON	RPL17	MRPS23	NUP93
GFI1	SKIV2L2	ZNF830	RPL27	YME1L1	ATXN10
MEIS1;MEIS2	XAB2	NUDC	RPL34	AIFM1	SEC61A1
CDK6	RBM8A	CDC5L	RPL36AL	MRPS25	PPIL2
TRRAP	U2SURP	RFC1	RPL4	MRPS26	CCT3
PRMT1	SNRNP200	FEN1	RPLP0;RPLP0P6	NDUFA13	CCT2
CEBPA	THOC2	XRCC1	RPL7	MRPS6	KPNB1
SPI1	PRPF6	RFC4	RPL13	MRPL38	DKC1
HIST1H2BH;HIST2H2BF;HIST1H2BL;HIST1H2BM;HIST1H2BN;HIST1H2BC;HIST1H2BD;HIST1H2BK;H2BFS	SRSF3	SSBP1	NOP58	CYC1	DYNC1H1
HCFC1	CLK3	SSBP3	NOP56	HSPA9	UBE2M
RUNX1	NCBP2	NELFA	RPS11	SAMM50	IMPDH2
KAT2A	SNRPE	RPA3	RPL12	TUFM	GTPBP4
ZBTB7A	SNRPD1	NELFE	RPS3A	MRPS35	RNF113A
NKAP;NKAPL	SRRT	BANF1	RPS15A	MRPS11	HMHA1
PML	U2AF2	NELFCD	RPL32	TOMM22	NUP88
RBBP4	NOP2	TAF15	RPS7	TRMT10C	TUBB;TUBB2B
TCF12	RBM22	SAFB	RPL11	TIMM44	RANGAP1
CTBP1	RBM14	XRCC6	RPS17	TFAM	SRP14
LMO2	PRPF8	TAF10	RPL8	SLC25A10	DNAJA3
LDB1	DDX18	PARP1	RPL18	SLC25A1	PPWD1
CREB1	PRPF19	TAF4	RPL15	MRPS33	ACTR3
PBX3	MYBBP1A	HMGA1	RPL31	MRPS9	USO1
KDM1A	DHX8	PAXBP1	RPL28	TIMM50	UMPS
SATB2	SNRPF	XRCC5	RPL6	MRPS10	XPO1
SATB1	EIF4A1	EEF1E1	RPS3	MRPS7	LRPPRC
RUNX2	SNRPB;SNRPN	PRKDC	BRIX1	NDUFA4	CCT4
FOSL2	LUC7L3	TOP2B	RPL5	MRPS15	FBL
LYL1	THOC7	THAP11	RPL7A	MRPS28	COPB1
MAFG;MAFK	YTHDC1	BLM	RPS9	MRPS2	CAD
ATF7	THOC3		RRS1	DLST	ARCN1
JUND	SF3B2		RPL36	PTCD3	CCT5
KDM2B	DDX21		RPL14	SLC25A22	PPP2CA;PPP2CB
JUNB	HNRNPK		RPL23A	MRPS31	IPO4
CEBPD	SF3A1		NHP2	CPT1A	CKAP5
MTA1	PUF60		HNRNPH1	CHCHD3	NUP62
CHD1	SF3B1		DIMT1	IMMT	DDOST
CEBPB	BUD31		RPL35A	SLC25A6;SLC25A4	NUP85
CEBPG	SF3A3		RPS2	ATP5J2	KEAP1
HAT1	RBM39		RPS4X	SLC25A3	PSMD3
CREBBP	EXOSC10		EIF3L	HADHA	NUP155
ZEB2	FIP1L1		RPS13	SQRDL	SEC13
ZBTB7B	USP39		RPL24	SFXN3	ATP2A2;ATP2A1;ATP2A3
NKRF	DHX16		RPL27A		ATP5B
PELP1	DHX30		SDAD1		EXOSC7
CBFA2T3	EPRS		RPL23		MYO1G
CUX1	U2AF1		RPL19		BCLAF1
MTDH	DHX15		RPS10		GIT1
MBD2	SF3B3		RPS28		LACTB
H2AFY	SART1		RPS14		CLTC
MBD3	PRPF31		RPS5		ARPC4
	EFTUD2		RPS8		PPIL1
	PRPF38A		RRP1		ATAD3B
	PTBP1		RPS19		CTSG
	SNRPD2		RPS23		CDK11B;CDK11A
	VARS		NHP2L1		TECR
	RBM17		RPS16		PCBP2;PCBP3
	DDX23		RPS18		MYO18A
	HNRNPU		RPSA		SAP30BP
	PRPF3		RPL7L1		ARPC1B
	DDX1		RPS25		SUN2
	PCBP1		RPL35		PPP1CA
	HNRNPC		RPLP2		PAK2
	NOP16		RPS12		DOCK8
	LSM2		RPS6		CCDC12
	AQR		RPS15		MYO1C
	NAT10		UTP23		ATP5C1
	DHX9		EIF6		BAG2
	SF3A2		EIF3E		VEZF1
	RBM28		RRP12		MYO1F
	YARS		LYAR		MYL12A;MYL12B;MYL9
	MARS		EBNA1BP2		YLPM1
	SF3B5		RPS4Y1		FERMT3
	PRPF4		RPL29		PNN
	C17orf85		RPS21		YWHAG
	CPSF4		MRTO4		QPCTL
	PRPF38B		RPS20		ACTN1
	SNRPG;SNRPGP15		TCOF1		MYADM
	RBMX		FAU		ARHGEF2
	SRSF5		RPF2		NUP54
	SRSF6		RRBP1		ARHGAP1
	SRSF10		RSL1D1		ARHGAP17
	TRA2B		RPL22		NUP35
	NCBP1				ACTN4
	RALY				CCT8
	SNRNP40				LEMD2
	DDX5				SDE2
	SRSF4				RPN2
	PLRG1				ARF4
	HNRNPUL1				LMNB2
	SNRPA				CDK12
	THOC6				PFKL
	CHTOP				TUBA1B
	SNRPA1				AIP
	ZCCHC8				ACTA1;ACTC1;ACTG2;ACTA2
	THOC1				LRCH4
	RNPS1				HSPD1
	CLK2				HSP90AB1
	FMR1				CACTIN
	CDC40				VASP
	HNRNPF				DCTN2
	DDX39B				PTPN6
	SNW1				PSME3
	ISY1				C1QBP
	BCAS2				ARHGEF1
	FXR2				SAFB2
	DDX41				TBL2
	PPIE				AP2A1
	CWC15				MAGT1
	ERH				ESYT1
	THOC5				CAND1
	SRPK1				MBOAT7
	SF3B4				YWHAB
	CWC22				PPIH
	PABPN1				DNM1L
	ZC3H14				YKT6
	HNRNPUL2				UBE2N
	HNRNPR				ARPC3
	HNRNPA1;HNRNPA1L2				HAX1
	HNRNPM				YWHAE
	RBM4B				C9orf78
	DDX6				SSR1
	RBM34				ZCCHC3
	HNRNPDL				TBKBP1
	DDX55				HSPA8
	DDX19B;DDX19A				MATR3
	HNRNPH2				CAPZA1
	HNRNPA0				HP1BP3
	RBM25				PSMD5
	RBM12B				LRRC59
	RBBP6				RAC2;RAC1;RAC3
	SYNCRIP				ACTB
	RBM15				ESYT2
	PRPF4B				ERLIN2
	CRNKL1				PHGDH
	WBP11				ARGLU1
	SRP72				PDCD6IP
	SUGP2				SKP1
	CLASRP				PKN1
	HNRNPD				TCP1
	DDX24				PPP1R9B
	GAR1				AP2B1;AP1B1
	SRPK2				HSP90AA1
	ALYREF				ACTR2
	RTCB				STXBP2
	SLU7				FLOT2
	ELAVL1				AZU1
	GPKOW				CORO1A
	TFIP11				NCOA5
	FUS				GMFG
	IK				FNBP4
	DGCR14				HCLS1
	CTNNBL1				CXorf56
	LSM3				C7orf50
	CCAR2				LCP1
	SRP68				PHRF1
	PABPC1				NUP205
	YBX1				FLOT1
	RBM27				CCNK
	BUD13				CALR
	SNRNP70
	RNH1
	FRG1
	ARL6IP4
	KIAA1429
	CCNL2
	ZC3H13
	PRPF40A
	SRSF8
	MAGOHB
	ILF2
	ILF3

## Sheet: Supplementary_file_3c
GSEA in 9 Clusters
Cluster 1
TermID	Enrichment	logP
DACOSTA_UV_RESPONSE_VIA_ERCC3_DN	4.01223e-78	-178.212
DACOSTA_UV_RESPONSE_VIA_ERCC3_COMMON_DN	1.53895e-53	-121.606
ZHENG_BOUND_BY_FOXP3	1.31271e-46	-105.647
AACTTT_UNKNOWN	7.98207e-42	-94.6314
CUI_TCF21_TARGETS_2_DN	1.26014e-36	-82.6618
TTGTTT_FOXO4_01	6.13249e-29	-64.9614
GRYDER_PAX3FOXO1_ENHANCERS_IN_TADS	2.11791e-27	-61.4194
PILON_KLF1_TARGETS_DN	8.0557e-27	-60.0834
TGGAAA_NFAT_Q4_01	6.57089e-25	-55.682
DAZARD_RESPONSE_TO_UV_NHEK_DN	3.23877e-23	-51.7843
ZHENG_FOXP3_TARGETS_IN_THYMUS_UP	3.98175e-22	-49.2752
KRIGE_RESPONSE_TO_TOSEDOSTAT_24HR_UP	2.25622e-20	-45.238
GSE29618_MONOCYTE_VS_MDC_DAY7_FLU_VACCINE_UP	3.50825e-20	-44.7966
GSE4590_LARGE_PRE_BCELL_VS_VPREB_POS_LARGE_PRE_BCELL_UP	3.65083e-20	-44.7567
RODRIGUES_THYROID_CARCINOMA_POORLY_DIFFERENTIATED_DN	5.97475e-20	-44.2642
FOSTER_TOLERANT_MACROPHAGE_DN	6.62187e-20	-44.1613
GSE29618_MONOCYTE_VS_MDC_UP	3.18042e-19	-42.5921
GRAESSMANN_APOPTOSIS_BY_DOXORUBICIN_DN	5.44261e-19	-42.0549
CREIGHTON_ENDOCRINE_THERAPY_RESISTANCE_3	1.60419e-18	-40.9739
GO_ENZYME_BINDING	2.23682e-18	-40.6415
Cluster 2
TermID	Enrichment	logP
GGGCGGR_SP1_Q6	8.41871e-74	-168.261
RCGCANGCGY_NRF1_Q6	4.4343e-51	-115.942
KRIGE_RESPONSE_TO_TOSEDOSTAT_24HR_DN	1.43075e-41	-94.0478
SCGGAAGY_ELK1_02	3.72221e-40	-90.7891
GO_RNA_BINDING	3.90322e-40	-90.7416
GTGACGY_E4F1_Q6	1.28774e-38	-87.2453
GO_POLY_A_RNA_BINDING	1.37906e-38	-87.1768
PILON_KLF1_TARGETS_DN	1.36184e-35	-80.2816
FISCHER_DREAM_TARGETS	5.77534e-35	-78.8369
CAIRO_HEPATOBLASTOMA_CLASSES_UP	4.25745e-34	-76.8392
GRAESSMANN_APOPTOSIS_BY_DOXORUBICIN_DN	7.74397e-32	-71.6358
KRIGE_RESPONSE_TO_TOSEDOSTAT_6HR_DN	8.84645e-32	-71.5027
DANG_BOUND_BY_MYC	3.44121e-31	-70.1443
BENPORATH_MYC_MAX_TARGETS	3.59629e-31	-70.1002
GO_CATALYTIC_COMPLEX	2.31497e-30	-68.2382
KINSEY_TARGETS_OF_EWSR1_FLII_FUSION_UP	1.26315e-29	-66.5414
DIAZ_CHRONIC_MEYLOGENOUS_LEUKEMIA_UP	4.72281e-29	-65.2226
GRADE_COLON_CANCER_UP	5.14459e-28	-62.8344
PUJANA_BRCA1_PCC_NETWORK	2.69117e-27	-61.1798
ACEVEDO_LIVER_TUMOR_VS_NORMAL_ADJACENT_TISSUE_UP	1.21792e-25	-57.3675
Cluster 3
TermID	Enrichment	logP
DACOSTA_UV_RESPONSE_VIA_ERCC3_DN	1.26369e-57	-131.013
AACTTT_UNKNOWN	2.96706e-36	-81.8055
DACOSTA_UV_RESPONSE_VIA_ERCC3_COMMON_DN	4.88139e-33	-74.3999
CUI_TCF21_TARGETS_2_DN	9.01857e-23	-50.7602
ZHENG_BOUND_BY_FOXP3	1.39332e-22	-50.3252
GO_CELL_PROJECTION	5.81196e-22	-48.897
GO_NEURON_PART	5.9707e-21	-46.5674
GO_SYNAPSE	4.79447e-20	-44.4842
GRYDER_PAX3FOXO1_ENHANCERS_IN_TADS	6.91484e-20	-44.118
TGGAAA_NFAT_Q4_01	1.01095e-19	-43.7382
DACOSTA_UV_RESPONSE_VIA_ERCC3_TTD_DN	9.72122e-19	-41.4748
MEISSNER_BRAIN_HCP_WITH_H3K4ME3_AND_H3K27ME3	1.35271e-18	-41.1444
GO_CELL_DEVELOPMENT	6.23597e-18	-39.6162
GO_CELL_JUNCTION	8.29685e-18	-39.3307
TGTTTAC_MIR30A5P_MIR30C_MIR30D_MIR30B_MIR30E5P	9.46568e-18	-39.1989
GO_SYNAPSE_PART	5.01772e-17	-37.531
GOZGIT_ESR1_TARGETS_DN	1.86922e-16	-36.2158
TTGTTT_FOXO4_01	3.14846e-16	-35.6944
GSE16450_CTRL_VS_IFNA_12H_STIM_IMMATURE_NEURON_CELL_LINE_UP	3.18139e-16	-35.684
GO_NEURON_PROJECTION	4.7436e-16	-35.2846
Cluster 4
TermID	Enrichment	logP
DACOSTA_UV_RESPONSE_VIA_ERCC3_DN	1.43791e-84	-193.054
DACOSTA_UV_RESPONSE_VIA_ERCC3_COMMON_DN	1.95319e-55	-125.973
GRYDER_PAX3FOXO1_ENHANCERS_IN_TADS	1.40139e-39	-89.4634
AACTTT_UNKNOWN	6.37838e-39	-87.9479
ZHENG_BOUND_BY_FOXP3	1.41861e-28	-64.1227
PILON_KLF1_TARGETS_DN	3.09166e-26	-58.7385
CUI_TCF21_TARGETS_2_DN	2.21517e-25	-56.7693
TTGTTT_FOXO4_01	4.56551e-24	-53.7435
DAZARD_RESPONSE_TO_UV_NHEK_DN	8.03433e-24	-53.1783
ZHENG_FOXP3_TARGETS_IN_THYMUS_UP	5.09333e-21	-46.7264
TGTTTAC_MIR30A5P_MIR30C_MIR30D_MIR30B_MIR30E5P	1.42038e-20	-45.7008
RODRIGUES_THYROID_CARCINOMA_POORLY_DIFFERENTIATED_DN	1.48429e-20	-45.6568
GRAESSMANN_APOPTOSIS_BY_DOXORUBICIN_DN	2.24877e-20	-45.2413
GRYDER_PAX3FOXO1_ENHANCERS_KO_DOWN	1.1409e-18	-41.3147
GSE16450_CTRL_VS_IFNA_12H_STIM_IMMATURE_NEURON_CELL_LINE_UP	1.86135e-18	-40.8252
RODRIGUES_THYROID_CARCINOMA_ANAPLASTIC_DN	4.66537e-18	-39.9064
TTTGCAC_MIR19A_MIR19B	8.94783e-18	-39.2551
NIKOLSKY_BREAST_CANCER_8Q12_Q22_AMPLICON	1.85664e-17	-38.5252
ATGTACA_MIR493	4.30615e-17	-37.6839
TGAATGT_MIR181A_MIR181B_MIR181C_MIR181D	5.96112e-17	-37.3587
Cluster 5
TermID	Enrichment	logP
DACOSTA_UV_RESPONSE_VIA_ERCC3_DN	2.59451e-29	-65.8216
AACTTT_UNKNOWN	9.47426e-27	-59.9212
CHEN_METABOLIC_SYNDROM_NETWORK	1.96909e-24	-54.5845
CAGGTG_E12_Q6	3.57949e-24	-53.9868
GO_CELL_PROJECTION	1.02125e-23	-52.9384
GRYDER_PAX3FOXO1_ENHANCERS_IN_TADS	2.43223e-23	-52.0706
GO_MOVEMENT_OF_CELL_OR_SUBCELLULAR_COMPONENT	9.02416e-23	-50.7596
GO_POSITIVE_REGULATION_OF_MOLECULAR_FUNCTION	1.04913e-22	-50.6089
CUI_TCF21_TARGETS_2_DN	1.84113e-22	-50.0465
GO_LOCOMOTION	3.48026e-22	-49.4098
MARTENS_BOUND_BY_PML_RARA_FUSION	6.20266e-22	-48.8319
GO_MEMBRANE_REGION	7.4443e-22	-48.6494
GO_IMMUNE_SYSTEM_PROCESS	3.03829e-21	-47.243
GO_INTRACELLULAR_SIGNAL_TRANSDUCTION	5.46221e-21	-46.6564
DACOSTA_UV_RESPONSE_VIA_ERCC3_COMMON_DN	7.92632e-21	-46.2841
GSE9988_ANTI_TREM1_VS_VEHICLE_TREATED_MONOCYTES_DN	2.94633e-20	-44.9711
GO_CELL_JUNCTION	9.79805e-20	-43.7695
GO_POSITIVE_REGULATION_OF_CATALYTIC_ACTIVITY	1.24273e-19	-43.5318
GSE10325_LUPUS_CD4_TCELL_VS_LUPUS_BCELL_DN	2.1715e-19	-42.9737
TTGTTT_FOXO4_01	2.37914e-19	-42.8824
Cluster 6
TermID	Enrichment	logP
SCGGAAGY_ELK1_02	3.77236e-20	-44.724
NRSF_01	2.05645e-16	-36.1204
PILON_KLF1_TARGETS_DN	2.69097e-16	-35.8515
PUJANA_BRCA1_PCC_NETWORK	8.73506e-14	-30.0688
GO_RNA_BINDING	2.82225e-13	-28.8961
CAGNWMCNNNGAC_UNKNOWN	1.05577e-12	-27.5767
MIKKELSEN_MEF_HCP_WITH_H3K27ME3	1.66755e-12	-27.1197
GO_POLY_A_RNA_BINDING	1.00993e-11	-25.3186
AACTTT_UNKNOWN	6.61456e-11	-23.4392
MARTENS_TRETINOIN_RESPONSE_DN	6.5361e-10	-21.1485
GO_RIBONUCLEOPROTEIN_COMPLEX	6.64654e-10	-21.1318
MGGAAGTG_GABP_B	1.39652e-09	-20.3893
PUJANA_ATM_PCC_NETWORK	2.46796e-09	-19.8199
GO_NEURON_PART	4.52861e-08	-16.9103
GRADE_COLON_CANCER_UP	5.12396e-08	-16.7868
GABP_B	8.13394e-08	-16.3246
GO_MODULATION_OF_SYNAPTIC_TRANSMISSION	8.86464e-08	-16.2386
GO_CHROMATIN_ORGANIZATION	9.51401e-08	-16.1679
REACTOME_NEURONAL_SYSTEM	1.04072e-07	-16.0782
OISHI_CHOLANGIOMA_STEM_CELL_LIKE_UP	1.39355e-07	-15.7862
Cluster 7
TermID	Enrichment	logP
MEISSNER_BRAIN_HCP_WITH_H3K4ME3_AND_H3K27ME3	9.81498e-31	-69.0962
PEREZ_TP63_TARGETS	2.64709e-28	-63.4989
PEREZ_TP53_TARGETS	1.09838e-26	-59.7734
MARTENS_BOUND_BY_PML_RARA_FUSION	1.91535e-22	-50.007
PEREZ_TP53_AND_TP63_TARGETS	1.13676e-21	-48.2261
GO_NEUROGENESIS	8.88119e-21	-46.1704
AACTTT_UNKNOWN	2.25337e-20	-45.2393
GO_CELL_DEVELOPMENT	1.53075e-19	-43.3234
BENPORATH_ES_WITH_H3K27ME3	4.26021e-19	-42.2998
GO_REGULATION_OF_ANATOMICAL_STRUCTURE_MORPHOGENESIS	7.67299e-18	-39.4088
BENPORATH_SUZ12_TARGETS	9.79637e-18	-39.1645
GO_LOCOMOTION	1.43111e-17	-38.7855
TGCCTTA_MIR124A	2.81727e-17	-38.1082
GO_NEURON_DIFFERENTIATION	6.61486e-17	-37.2546
GO_MOVEMENT_OF_CELL_OR_SUBCELLULAR_COMPONENT	1.48386e-16	-36.4467
MEISSNER_NPC_HCP_WITH_H3K4ME2	4.58052e-16	-35.3195
SENESE_HDAC3_TARGETS_DN	1.98831e-15	-33.8515
CAGGTG_E12_Q6	3.3609e-15	-33.3266
GO_REGULATION_OF_TRANSPORT	3.92431e-15	-33.1716
GO_REGULATION_OF_CELL_DIFFERENTIATION	4.02747e-15	-33.1456
Cluster 8
TermID	Enrichment	logP
DACOSTA_UV_RESPONSE_VIA_ERCC3_DN	5.84187e-40	-90.3384
AACTTT_UNKNOWN	2.75936e-30	-68.0626
GSE29618_MONOCYTE_VS_PDC_DAY7_FLU_VACCINE_UP	9.81153e-30	-66.794
GSE22886_NAIVE_CD8_TCELL_VS_MONOCYTE_DN	5.34439e-29	-65.0989
ZHENG_BOUND_BY_FOXP3	3.53075e-28	-63.2109
GSE10325_LUPUS_BCELL_VS_LUPUS_MYELOID_DN	1.51505e-27	-61.7544
CUI_TCF21_TARGETS_2_DN	1.03935e-26	-59.8286
DACOSTA_UV_RESPONSE_VIA_ERCC3_COMMON_DN	1.01788e-25	-57.5469
GSE10325_LUPUS_CD4_TCELL_VS_LUPUS_MYELOID_DN	1.095e-25	-57.4739
CHEN_METABOLIC_SYNDROM_NETWORK	1.6515e-25	-57.0629
GSE22886_NAIVE_TCELL_VS_MONOCYTE_DN	5.3729e-25	-55.8833
MARTENS_BOUND_BY_PML_RARA_FUSION	2.38216e-23	-52.0914
GSE22886_NAIVE_CD4_TCELL_VS_MONOCYTE_DN	2.41964e-22	-49.7733
GSE10325_CD4_TCELL_VS_MYELOID_DN	4.37317e-22	-49.1814
RUTELLA_RESPONSE_TO_HGF_VS_CSF2RB_AND_IL4_UP	6.44275e-22	-48.7939
GSE11057_CD4_CENT_MEM_VS_PBMC_DN	2.17432e-21	-47.5776
KRIGE_RESPONSE_TO_TOSEDOSTAT_24HR_UP	3.00897e-21	-47.2527
GSE29618_PDC_VS_MDC_DAY7_FLU_VACCINE_DN	3.07694e-21	-47.2304
TTGTTT_FOXO4_01	1.258e-20	-45.8222
GSE11057_CD4_EFF_MEM_VS_PBMC_DN	1.41904e-20	-45.7017
Cluster 9
TermID	Enrichment	logP
DACOSTA_UV_RESPONSE_VIA_ERCC3_DN	1.40634e-51	-117.091
ZHENG_BOUND_BY_FOXP3	2.44248e-38	-86.6052
MARTENS_BOUND_BY_PML_RARA_FUSION	9.60886e-38	-85.2355
CUI_TCF21_TARGETS_2_DN	1.45494e-33	-75.6103
NUYTTEN_EZH2_TARGETS_UP	2.93189e-31	-70.3045
DACOSTA_UV_RESPONSE_VIA_ERCC3_COMMON_DN	1.13851e-30	-68.9478
GRYDER_PAX3FOXO1_ENHANCERS_IN_TADS	1.54356e-27	-61.7357
GSE9988_ANTI_TREM1_VS_CTRL_TREATED_MONOCYTES_UP	8.6785e-27	-60.0089
GO_INTRACELLULAR_SIGNAL_TRANSDUCTION	3.1899e-26	-58.7072
GSE9988_ANTI_TREM1_VS_VEHICLE_TREATED_MONOCYTES_UP	8.15036e-26	-57.7692
TGGAAA_NFAT_Q4_01	4.08594e-25	-56.1571
PILON_KLF1_TARGETS_DN	1.06282e-24	-55.2011
KOINUMA_TARGETS_OF_SMAD2_OR_SMAD3	1.08626e-24	-55.1793
BUYTAERT_PHOTODYNAMIC_THERAPY_STRESS_UP	6.05687e-24	-53.4608
CHARAFE_BREAST_CANCER_LUMINAL_VS_BASAL_DN	1.26053e-23	-52.7279
HALLMARK_TNFA_SIGNALING_VIA_NFKB	6.49377e-23	-51.0886
RUTELLA_RESPONSE_TO_HGF_UP	1.36165e-22	-50.3482
FOSTER_TOLERANT_MACROPHAGE_DN	7.34465e-22	-48.6629
ZWANG_CLASS_3_TRANSIENTLY_INDUCED_BY_EGF	9.27554e-22	-48.4295
AACTTT_UNKNOWN	3.33046e-21	-47.1512
